# Supplementary material for: Single-cell analysis of mosquito hemocytes identifies signatures of immune cell subtypes and cell differentiation
Source: eLife. 2021 Jul 28;10:e66192. doi: 10.7554/eLife.66192 (PMC8376254; doi:10.7554/eLife.66192)
Supplement: Figure 3—source data 1. [file elife-66192-fig3-data1.xlsx]

## Sheet: Figure 3D
Figure 3E
% of adherent cells
NimB2+	LRIM15+	SCRB9+
54	87	45	Exp.1
23	98	39
45	64	51
100	84.2105	1.63934
96.2963	53.8462	1.38889
84.2105	87.5	12.5
95.9184	72.3404	0
		2.38095
100	39.6226	3.7037	Exp. 2
85.1852	36.0656	2.7027
100	35.8491	8.69565
89.1892	46.6667	0
	78.1818	0
100	55.7377	6.06061	Exp.3
100	43.0556	0
100	33.3333	0
100	17.3913	0
100	66.6667	10
100	85.1852	0	Exp.4
100	77.7778	0
100	62.5	0
100	69.2308	0
100	57.1429	0
		0	Exp.5
		0
		0
		0
		0
		0	Exp.6
		0
		0
		0
		0

## Sheet: Figure 3E
Figure 3E
% of phagocytic cells
LRIM15+	SCRB9+
91.8033	0	Exp.1
100	0
100	0
100	0
83.3333	0
68.75	0	Exp.2
85.7143	0
88.8889	0
	0
	0

## Sheet: Figure 3F
Figure 3F
Phagocytic index (# beads/phagocytic cell)
LRIM15+	LRIM15-
6	1
1	4
9	3
1	6
7	1
6
1
2
3
4
3
5
10
3
1
1
1
1	1
1	1
1
1
1
1
4
1
1
5
3
1
1
1
1	1
1	1
1	1
6	1
1	1
6	1
4	7
1	1
8	2
3	1
4	1
1	1
1	1
3	3
2	1
3	3
1	1
8	5
2	1
7	1
3	2
2	1
3
2
2
1
3
3
3
4
1
13
2
5
2
5
2
3
2
2	1
2	2
1	3
1	1
3	2
5	2
2
3
1
7
2
2
1
1
3
10
3
7
6
2
1
5
1
1
2
1
2	1
5	4
10	3
1
2
3
5
3
12
11
1
3
5
2
15
14
5
2
1
4
2
1
3
25
3
4
1	1
2
1
1
1
1
1
1
3
1
2
1
1

## Sheet: Figure 3G
Figure 3G
% of NimB2+/LRIM15+ cells
LP	CLD
83.3333	32.7586	Exp.1
57.4074	16.6667
79.5918	9.09091
74.5455	16.6667
76	0
64.8148	0	Exp.2
53.8462	16.6667
84.2105	7.69231
74.5098	0
53.7037

## Sheet: Figure 3H
Figure 3H
Relative gene expression
LP	NimB2	LRIM15	LRIM16A	SCRB9	SCRB3	PPO1
1	0.184	0.304	0.262	1.082	1.071	1.01776
1	0.288	0.55	0.45	0.921	1.087	1.36
1	0.1932		0.27	1.363	1.226	0.14
1	0.338		0.16	0.993	0.903	3.18
	0.28					0.97
	0.24					0.37
	0.184					0.47
