# Supplementary material for: Single-cell analysis of mosquito hemocytes identifies signatures of immune cell subtypes and cell differentiation
Source: eLife. 2021 Jul 28;10:e66192. doi: 10.7554/eLife.66192 (PMC8376254; doi:10.7554/eLife.66192)
Supplement: Figure 5—source data 1. [file elife-66192-fig5-data1.xlsx]

## Sheet: Figure 6B
Figure 5B
% of adherent cells
Lz+/NimB2+	Lz-/NimB2+
23.5955	76.4045
19.1626	80.8374
9.41177	90.5882
22.932	77.068
13.8889	86.1111
10.8696	89.1304
11.1111	88.8889
5.12821	94.8718
21.6667	78.3333

## Sheet: Figure 6C
Figure 5C
% of adherent cells
SCRB9+/Lz-	SCRB9-/Lz+	SCRB9+/Lz+	SCRB9-/Lz-
2.22222	17.7778	6.66667	73.3333
1.72414	17.2414	8.62069	72.4138
8	6	10	76
8.47458	8.47458	15.2542	67.7966
0	11.5385	1.92308	86.5385
9.09091	0	0	90.9091
0	14.0625	0	85.9375
0	6.66667	13.3333	80
1.88679	28.3019	5.66038	64.1509
0	17.8571	1.78571	80.3571
0	24.3243	10.8108	64.8649
1.81818	12.7273	10.9091	74.5455
0	13.0435	2.17391	84.7826
0	8	0	92
0	20.3125	1.5625	78.125
0	13.4615	1.92308	84.6154
0	10.6061	1.51515	87.8788
0	15.2542	0	84.7458

## Sheet: Figure 6D
Figure 5D
LRIM15+/SCRB9-			LRIM15-/SCRB9+
% of adherent cells			% of adherent cells
dsGFP	dsLz		dsGFP	dsLz
18.75	9.09091		0	0
48.2759	25.5319		0	2.12766
35.1351	46.3415		2.7027	2.43902
31.3726	75		1.96078	0
28.5714	50		0	0
45.4545	40		3.0303	0
33.3333			9.09091
55			5
11.1111			2.22222
32.6923			3.84615
52.5	61.9048		0	0
37.7049	34.1463		3.27869	2.43902
25.5814	15.3846		0	0
38.8889	8.82353		0	0
38.1818			1.81818
36.3636	70.1754		0	0
50	35.8491		0	0
48.2143	25.4546		0	0
40.3846	23.0769		1.92308	0
	39.2857			0
	71.4286			0

## Sheet: Figure 6E
Figure 5E
Relative gene expression
PPOs	PPO1	PPO2	PPO3	PPO4	PPO5	PPO6	PPO8	PPO9
1	0.43	0.91	0.487	1.414	1.16	0.74	0.39	1.27
1	0.231	0.53	0.157	1.08	0.95	0.679	0.249	0.897
1	0.354	0.3627	0.332	0.806	0.744	0.7711	0.395	1.361
