# Supplementary material for: Single-cell analysis of mosquito hemocytes identifies signatures of immune cell subtypes and cell differentiation
Source: eLife journal article supplement (doi:10.7554/elife.66192), 2021-07-28
Supplement: supp3 [file elife-66192-supp3-v2.xlsx]

## Sheet: DEG_clusters
Gene	Gene Name	Annotation	p_val	avg_logFC	pct.1	pct.2	p_val_adj	cluster
AGAP004634		Unknown	3.51763e-09	1.84067	0.538	0.063	4.61899e-05	C_1
AGAP005742		semaphorin [Source:VB Community Annotation]	5.58261e-10	1.83134	0.538	0.054	7.33053e-06	C_1
AGAP003289		carbonic anhydrase [Source:VB Community Annotation]	1.65399e-13	1.79122	0.615	0.046	2.17185e-09	C_1
AGAP001169	Gr49	gustatory receptor 49 [Source:VB Community Annotation]	1.21647e-08	1.58451	0.615	0.088	0.000159734	C_1
AGAP003386		Unknown	1.46014e-07	1.56707	0.538	0.075	0.00191732	C_1
AGAP011968	IR76b	ionotropic receptor IR76b [Source:VB Community Annotation]	6.26034e-09	1.55846	0.538	0.063	8.22046e-05	C_1
AGAP008766			7.92766e-11	1.53334	0.538	0.046	1.04098e-06	C_1
AGAP006878		mitochondrial complex I protein Fmp36 [Source:VB Community Annotation]	4.93279e-07	1.46629	0.538	0.084	0.00647724	C_1
AGAP010795		Unknown	9.31485e-08	1.44989	0.538	0.071	0.00122313	C_1
AGAP003606		Fatty acyl-CoA reductase [Source:UniProtKB/TrEMBL%3BAcc:Q7QAN6]	1.7465e-06	1.44141	0.538	0.092	0.0229333	C_1
AGAP010360		Unknown	1.50615e-07	1.43815	0.692	0.13	0.00197772	C_1
AGAP003349		Unknown	9.48013e-09	1.42058	0.615	0.084	0.000124484	C_1
AGAP010628		Unknown	1.51728e-06	1.35814	0.615	0.113	0.0199234	C_1
AGAP013469		Unknown	2.48802e-07	1.33609	0.538	0.079	0.00326702	C_1
AGAP006222		glucosyl/glucuronosyl transferases [Source:VB Community Annotation]	5.32121e-07	1.32912	0.538	0.084	0.00698728	C_1
AGAP000844		Progestin and adipoQ receptor family member 4 [Source:VB Community Annotation]	1.65476e-06	1.31038	0.615	0.126	0.0217287	C_1
AGAP011348		arylsulfatase b [Source:VB Community Annotation]	1.73956e-07	1.30846	0.538	0.079	0.00228422	C_1
AGAP001123	Gr36	gustatory receptor 36 [Source:VB Community Annotation]	5.246e-07	1.30817	0.615	0.109	0.00688853	C_1
AGAP002276		Unknown	1.58893e-09	1.30423	0.538	0.054	2.08642e-05	C_1
AGAP004323		Unknown	1.46014e-07	1.30034	0.538	0.075	0.00191732	C_1
AGAP007066		tRNA-specific adenosine deaminase 3 [Source:VB Community Annotation]	6.23123e-07	1.28941	0.692	0.142	0.00818222	C_1
AGAP002257		tetraspanin 14 [Source:VB Community Annotation]	4.14897e-06	1.28695	0.615	0.134	0.0544802	C_1
AGAP008258		lactosylceramide 4-alpha-galactosyltransferase [Source:VB Community Annotation]	8.20225e-08	1.26657	0.538	0.071	0.00107704	C_1
AGAP004841		Unknown	6.19237e-08	1.21886	0.692	0.126	0.00081312	C_1
AGAP013533		Unknown	9.32196e-06	1.21807	0.615	0.13	0.122407	C_1
AGAP010073		type II pantothenate kinase [Source:VB Community Annotation]	5.95965e-07	1.20439	0.538	0.084	0.00782561	C_1
AGAP003263		CDC42 small effector protein-like protein [Source:VB Community Annotation]	5.18025e-08	1.20262	0.692	0.113	0.000680218	C_1
AGAP002274		Unknown	7.02401e-06	1.19612	0.615	0.138	0.0922323	C_1
AGAP002205	CYP325C2	cytochrome P450 [Source:VB Community Annotation]	1.16226e-08	1.18535	0.692	0.1	0.000152617	C_1
AGAP007198		Unknown	6.02927e-06	1.18414	0.538	0.105	0.0791703	C_1
AGAP009385		cellular retinaldehyde-binding protein [Source:VB Community Annotation]	1.51126e-08	1.17645	0.769	0.126	0.000198443	C_1
AGAP010545		Trypsin-like serine protease	9.72204e-08	1.17085	0.615	0.092	0.0012766	C_1
AGAP005146		Unknown	1.50005e-07	1.17081	0.615	0.096	0.00196971	C_1
AGAP007783		Unknown	8.33915e-08	1.16664	0.615	0.092	0.00109501	C_1
AGAP007877		Unknown	2.88824e-06	1.13225	0.615	0.126	0.0379255	C_1
AGAP028716		Unknown	7.5363e-09	1.12081	0.615	0.079	9.89591e-05	C_1
AGAP011087		Unknown	2.89376e-08	1.12022	0.692	0.113	0.000379979	C_1
AGAP008559		Unknown	3.79924e-07	1.09538	0.769	0.163	0.00498878	C_1
AGAP011737		A disintegrin and metalloproteinase with thrombospondin motifs 16 [Source:VB Community Annotation]	3.25857e-06	1.09195	0.692	0.146	0.0427883	C_1
AGAP006045		protein yorkie [Source:VB Community Annotation]	2.38214e-06	1.09145	0.615	0.113	0.0312799	C_1
AGAP009317		adenylate kinase [Source:VB Community Annotation]	6.62555e-07	1.09051	0.615	0.105	0.00870001	C_1
AGAP005714		Unknown	9.89283e-06	1.08383	0.615	0.134	0.129903	C_1
AGAP009683		sidestep protein [Source:VB Community Annotation]	1.33737e-06	1.0759	0.692	0.13	0.0175609	C_1
AGAP006370		Unknown	6.57303e-07	1.06351	0.538	0.079	0.00863105	C_1
AGAP002482		lysophosphatidylglycerol acyltransferase 1 [Source:VB Community Annotation]	3.25843e-06	1.06192	0.538	0.092	0.0427865	C_1
AGAP010272	IR25a	ionotropic receptor IR25a [Source:VB Community Annotation]	5.85304e-06	1.06079	0.615	0.121	0.0768563	C_1
AGAP013391		Unknown	7.43522e-06	1.04162	0.538	0.096	0.0976319	C_1
AGAP013144		Unknown	8.41986e-07	1.03782	0.615	0.105	0.0110561	C_1
AGAP000163	GSTMS2	glutathione transferase microsomal 2 [Source:VB Community Annotation]	6.03148e-06	1.03402	0.615	0.121	0.0791994	C_1
AGAP005955		E3 ubiquitin-protein ligase MUL1 [Source:VB Community Annotation]	9.97356e-07	1.02621	0.538	0.079	0.0130963	C_1
AGAP002998		Unknown	2.36666e-06	1.02196	0.538	0.088	0.0310766	C_1
AGAP012399		maltase [Source:VB Community Annotation]	2.82791e-06	1.01786	0.846	0.213	0.0371332	C_1
AGAP002199		Unknown	1.79064e-07	1.00889	0.538	0.075	0.00235129	C_1
AGAP004478		ATP synthase subunit s%2C mitochondrial precursor [Source:VB Community Annotation]	8.14856e-18	1.94025	0.667	0.052	1.06999e-13	C_2
AGAP000454		Unknown	2.3398e-12	1.6995	0.571	0.065	3.07239e-08	C_2
AGAP007002		transcription initiation factor TFIIF subunit beta [Source:VB Community Annotation]	6.87781e-13	1.68042	0.571	0.061	9.03125e-09	C_2
AGAP010220		Proliferating cell nuclear antigen [Source:UniProtKB/TrEMBL%3BAcc:Q7Q0Q0]	4.06945e-12	1.53477	0.667	0.095	5.34359e-08	C_2
AGAP002541		UPF0528 family	7.49792e-11	1.4528	0.524	0.061	9.84551e-07	C_2
AGAP003732		Unknown	1.20461e-12	1.45252	0.571	0.061	1.58177e-08	C_2
AGAP002257		tetraspanin 14 [Source:VB Community Annotation]	1.09001e-09	1.43772	0.619	0.117	1.43129e-05	C_2
AGAP000339		E3 ubiquitin-protein ligase Hakai [Source:VB Community Annotation]	2.82233e-11	1.42983	0.524	0.056	3.706e-07	C_2
AGAP002764		DUF1487	1.00975e-11	1.39355	0.762	0.126	1.3259e-07	C_2
AGAP010440		small nuclear ribonucleoprotein E [Source:VB Community Annotation]	2.27264e-12	1.38974	0.762	0.113	2.9842e-08	C_2
AGAP001421		replication factor A1 [Source:VB Community Annotation]	2.26564e-11	1.38139	0.762	0.139	2.97502e-07	C_2
AGAP011729		Nonspecific nucleoside hydrolase [Source:VB Community Annotation]	1.75762e-10	1.37848	0.667	0.104	2.30794e-06	C_2
AGAP007872		Mps one binder kinase activator-like 3 [Source:VB Community Annotation]	4.11573e-10	1.36759	0.524	0.069	5.40437e-06	C_2
AGAP011448	fen1	Flap endonuclease 1 [Source:UniProtKB/Swiss-Prot%3BAcc:Q7Q323]	6.9816e-10	1.3636	0.619	0.1	9.16754e-06	C_2
AGAP007813		ankyrin repeat domain-containing protein 49 [Source:VB Community Annotation]	4.29936e-13	1.35486	0.619	0.069	5.64549e-09	C_2
AGAP006119		ODR-4 family	1.21466e-11	1.35121	0.619	0.082	1.59496e-07	C_2
AGAP003613		palmitoyltransferase ZDHHC3 [Source:VB Community Annotation]	5.96289e-07	1.34027	0.524	0.117	0.00782987	C_2
AGAP028740		Unknown	4.02952e-12	1.33965	0.714	0.1	5.29116e-08	C_2
AGAP010698		U3 small nucleolar RNA-associated protein 5 [Source:VB Community Annotation]	6.67899e-09	1.33906	0.524	0.082	8.77018e-05	C_2
AGAP007522		Adaptor-related protein complex 3%2C sigma 1 subunit [Source:VB Community Annotation]	2.44864e-14	1.33562	0.857	0.121	3.21531e-10	C_2
AGAP007809	AP7862	Leucine aminopeptidase/peptidase B	6.42127e-13	1.3231	0.905	0.156	8.43176e-09	C_2
AGAP011132		GINS complex subunit 3 [Source:VB Community Annotation]	2.15823e-10	1.32035	0.524	0.065	2.83397e-06	C_2
AGAP010217		protein disulfide-isomerase [Source:VB Community Annotation]	5.31416e-12	1.3173	0.714	0.108	6.97803e-08	C_2
AGAP011364		Unknown	4.9652e-10	1.3072	0.619	0.095	6.51981e-06	C_2
AGAP002829	SPN-E	ATP-dependent RNA helicase spindle-E [Source:VB Community Annotation]	1.08268e-09	1.30559	0.571	0.091	1.42167e-05	C_2
AGAP002097		beta-1%2C3-galactosyltransferase brn [Source:VB Community Annotation]	2.98426e-11	1.29395	0.667	0.104	3.91863e-07	C_2
AGAP004723		chromobox protein homolog 1 [Source:VB Community Annotation]	3.99096e-09	1.29137	0.571	0.095	5.24053e-05	C_2
AGAP012933		Unknown	3.15551e-10	1.28948	0.714	0.126	4.1435e-06	C_2
AGAP007891		methionyl-tRNA synthetase [Source:VB Community Annotation]	5.87236e-09	1.28911	0.619	0.117	7.711e-05	C_2
AGAP005801		Unknown	3.32385e-07	1.28873	0.571	0.126	0.00436455	C_2
AGAP028194		Unknown	9.60015e-09	1.28511	0.524	0.082	0.00012606	C_2
AGAP001719		Unknown	1.43982e-08	1.28101	0.619	0.113	0.000189063	C_2
AGAP008774		Unknown	1.17591e-09	1.27982	0.571	0.082	1.54409e-05	C_2
AGAP009188		solute carrier family 39 (zinc transporter)%2C member 9 [Source:VB Community Annotation]	2.65631e-08	1.27556	0.571	0.104	0.000348799	C_2
AGAP005934		Tumor susceptibility 101 protein [Source:VB Community Annotation]	2.93393e-09	1.27553	0.667	0.126	3.85254e-05	C_2
AGAP013475		Peptidyl-prolyl cis-trans isomerase NIMA-interacting 1 [Source:VB Community Annotation]	5.30525e-10	1.27544	0.619	0.095	6.96632e-06	C_2
AGAP002627		S-formylglutathione hydrolase [Source:UniProtKB/TrEMBL%3BAcc:Q7QCH6]	1.35871e-11	1.2604	0.81	0.143	1.78412e-07	C_2
AGAP028632	hay	haywire protein DNA repair helicase [Source:VB Community Annotation]	1.42904e-09	1.25935	0.619	0.108	1.87648e-05	C_2
AGAP008499		mitochondrial transcription factor A [Source:VB Community Annotation]	5.85832e-10	1.2576	0.619	0.095	7.69256e-06	C_2
AGAP010177		replication factor A3 [Source:VB Community Annotation]	4.56203e-13	1.25559	0.905	0.152	5.9904e-09	C_2
AGAP005825		acylglycerol kinase [Source:VB Community Annotation]	6.25061e-10	1.25169	0.524	0.074	8.20768e-06	C_2
AGAP007784		enoyl-CoA hydratase / long-chain 3-hydroxyacyl-CoA dehydrogenase [Source:VB Community Annotation]	2.60683e-11	1.25018	0.857	0.169	3.42302e-07	C_2
AGAP001036		G protein beta subunit-like [Source:VB Community Annotation]	3.78681e-11	1.24481	0.667	0.104	4.97246e-07	C_2
AGAP010770		Tubulin-specific chaperone E	8.56108e-09	1.2416	0.714	0.16	0.000112416	C_2
AGAP004191	Med22	Mediator of RNA polymerase II transcription subunit 22 [Source:UniProtKB/Swiss-Prot%3BAcc:Q7QB45]	1.89975e-08	1.24101	0.524	0.082	0.000249456	C_2
AGAP005191		exosome complex exonuclease DIS3/RRP44 [Source:VB Community Annotation]	2.59153e-08	1.2358	0.571	0.108	0.000340293	C_2
AGAP001888		Alpha-(1%2C6)-fucosyltransferase [Source:UniProtKB/TrEMBL%3BAcc:Q7PYD8]	1.66986e-08	1.22949	0.524	0.082	0.000219269	C_2
AGAP006372		U3 small nucleolar ribonucleoprotein protein IMP3 [Source:VB Community Annotation]	1.96461e-09	1.22732	0.571	0.091	2.57972e-05	C_2
AGAP011837		U6 snRNA-associated Sm-like protein LSm8 [Source:VB Community Annotation]	7.93581e-11	1.22646	0.81	0.143	1.04205e-06	C_2
AGAP001745		26S proteasome regulatory subunit RPN2 [Source:VB Community Annotation]	9.68959e-11	1.22338	0.857	0.177	1.27234e-06	C_2
AGAP002831		ribosomal RNA small subunit methyltransferase H [Source:VB Community Annotation]	3.73788e-11	1.22247	0.619	0.087	4.90821e-07	C_2
AGAP008405	mRpL24	39S ribosomal protein L24%2C mitochondrial [Source:VB Community Annotation]	9.04892e-09	1.21899	0.571	0.095	0.000118821	C_2
AGAP008332		replication factor A2 [Source:VB Community Annotation]	2.46725e-10	1.20669	0.81	0.156	3.23975e-06	C_2
AGAP010978		nuclear pore complex protein Nup62 [Source:VB Community Annotation]	3.80827e-09	1.20666	0.667	0.126	5.00064e-05	C_2
AGAP007610		Unknown	5.71966e-11	1.20519	0.762	0.139	7.51048e-07	C_2
AGAP007381		Unknown	1.36714e-09	1.20211	0.667	0.126	1.79519e-05	C_2
AGAP002405		Unknown	1.07578e-10	1.19916	0.667	0.1	1.41261e-06	C_2
AGAP009222		DNA ligase 1 [Source:VB Community Annotation]	3.56657e-08	1.19868	0.619	0.134	0.000468327	C_2
AGAP001585		deoxynucleoside kinase [Source:VB Community Annotation]	1.45253e-09	1.19746	0.619	0.104	1.90731e-05	C_2
AGAP002333		Domain of unknown function (DUF947)	8.51112e-09	1.19641	0.619	0.113	0.000111759	C_2
AGAP028076		Unknown	1.0921e-08	1.19283	0.667	0.147	0.000143403	C_2
AGAP008946		Alpha-1%2C3-glucosyltransferase [Source:UniProtKB/TrEMBL%3BAcc:Q5TNL1]	5.36765e-09	1.18482	0.571	0.091	7.04826e-05	C_2
AGAP002183		Signal recognition particle subunit SRP68 [Source:UniProtKB/TrEMBL%3BAcc:Q7QK73]	7.33034e-07	1.18435	0.524	0.113	0.00962547	C_2
AGAP011818		Unknown	1.64162e-09	1.18134	0.571	0.087	2.15562e-05	C_2
AGAP001976		Archease [Source:VB Community Annotation]	4.35333e-10	1.18027	0.571	0.078	5.71636e-06	C_2
AGAP008375		mannose-P-dolichol utilization defect 1 [Source:VB Community Annotation]	1.75672e-09	1.17237	0.667	0.117	2.30675e-05	C_2
AGAP008852		Unknown	1.37854e-09	1.1629	0.667	0.121	1.81015e-05	C_2
AGAP000479		pre-rRNA-processing protein IPI3 [Source:VB Community Annotation]	9.54938e-12	1.16074	0.762	0.117	1.25393e-07	C_2
AGAP005080		Ribulose-phosphate 3-epimerase [Source:UniProtKB/TrEMBL%3BAcc:Q7Q9R5]	1.36709e-09	1.155	0.762	0.152	1.79512e-05	C_2
AGAP006193		E3 ligase	4.23749e-08	1.15343	0.571	0.108	0.000556425	C_2
AGAP011375		Selenophosphate synthetase 2 [Source:VB Community Annotation]	4.18236e-07	1.14311	0.524	0.1	0.00549185	C_2
AGAP009445		Unknown	1.71246e-10	1.14236	0.762	0.13	2.24863e-06	C_2
AGAP009547		torsin A [Source:VB Community Annotation]	1.60664e-09	1.1411	0.857	0.199	2.10968e-05	C_2
AGAP006616		Presequence protease%2C mitochondrial [Source:VB Community Annotation]	1.95724e-07	1.13956	0.619	0.139	0.00257005	C_2
AGAP001589		Methylthioribose-1-phosphate isomerase [Source:UniProtKB/Swiss-Prot%3BAcc:Q7PKS9]	3.07684e-08	1.12969	0.571	0.104	0.000404019	C_2
AGAP003614		DUF788, TMEM208	1.36709e-10	1.12697	0.952	0.203	1.79513e-06	C_2
AGAP002348		exosome complex component RRP45 [Source:VB Community Annotation]	2.52966e-09	1.12571	0.571	0.087	3.32169e-05	C_2
AGAP011353		phosphomannomutase [Source:VB Community Annotation]	1.82862e-09	1.1247	0.619	0.1	2.40116e-05	C_2
AGAP004145		RNA-binding protein PNO1 [Source:VB Community Annotation]	3.92173e-09	1.12338	0.762	0.156	5.14962e-05	C_2
AGAP012283		cysteinyl-tRNA synthetase [Source:VB Community Annotation]	2.25081e-07	1.12241	0.619	0.147	0.00295554	C_2
AGAP008124		chitinase domain-containing protein 1 [Source:VB Community Annotation]	2.8468e-06	1.12089	0.571	0.139	0.0373814	C_2
AGAP001818		homeobox prox 1 [Source:VB Community Annotation]	9.99452e-11	1.12075	0.571	0.074	1.31238e-06	C_2
AGAP005522		transcription initiation factor TFIID subunit 11 [Source:VB Community Annotation]	2.99669e-07	1.12029	0.524	0.1	0.00393496	C_2
AGAP004174		Unknown	1.46941e-10	1.11897	0.619	0.091	1.92948e-06	C_2
AGAP007066		tRNA-specific adenosine deaminase 3 [Source:VB Community Annotation]	9.5874e-07	1.11694	0.571	0.134	0.0125892	C_2
AGAP011801		Coiled-coil domain-containing protein 22 homolog [Source:UniProtKB/Swiss-Prot%3BAcc:Q7PZ96]	1.84644e-06	1.1161	0.524	0.113	0.0242456	C_2
AGAP007111		uracil phosphoribosyltransferase [Source:VB Community Annotation]	8.82285e-07	1.10442	0.571	0.13	0.0115853	C_2
AGAP008637	APG7A	autophagy related gene [Source:VB Community Annotation]	1.36732e-08	1.10144	0.714	0.16	0.000179543	C_2
AGAP013112		mRNA binding protein [Source:VB Community Annotation]	8.15931e-08	1.10135	0.667	0.152	0.0010714	C_2
AGAP001724	Sply	sphingosine-1-phosphate lyase [Source:VB Community Annotation]	1.05635e-06	1.09731	0.571	0.134	0.013871	C_2
AGAP008297		leucyl-tRNA synthetase [Source:VB Community Annotation]	9.02322e-12	1.09676	0.905	0.186	1.18484e-07	C_2
AGAP011346		ER membrane protein complex subunit 10	9.3816e-09	1.09447	0.762	0.156	0.00012319	C_2
AGAP011422		carboxy-terminal domain RNA polymerase II polypeptide A small phosphatase [Source:VB Community Annotation]	9.99275e-09	1.09166	0.667	0.13	0.000131215	C_2
AGAP003593		Protein arginine methyltransferase RmtB [Source:VB Community Annotation]	7.67397e-07	1.09099	0.524	0.108	0.0100767	C_2
AGAP005260		dTMP kinase [Source:VB Community Annotation]	7.78102e-10	1.08944	0.762	0.147	1.02173e-05	C_2
AGAP002504		tRNA (cytosine34-C5)-methyltransferase [Source:VB Community Annotation]	1.20148e-10	1.08914	0.857	0.173	1.57767e-06	C_2
AGAP004029		DNA excision repair protein ERCC-1 [Source:VB Community Annotation]	1.35326e-08	1.08673	0.571	0.095	0.000177697	C_2
AGAP005778		iduronate 2-sulfatase [Source:VB Community Annotation]	2.90896e-09	1.08371	0.619	0.108	3.81976e-05	C_2
AGAP011723		mannose-1-phosphate guanylyltransferase [Source:VB Community Annotation]	1.01202e-07	1.08031	0.619	0.13	0.00132889	C_2
AGAP008540		phosphatidylinositol glycan%2C class T [Source:VB Community Annotation]	2.04695e-08	1.07912	0.714	0.147	0.000268785	C_2
AGAP002472		DNA damage-binding protein 1 [Source:VB Community Annotation]	1.14126e-08	1.07735	0.714	0.169	0.000149859	C_2
AGAP006916	mRpL54	39S ribosomal protein L54%2C mitochondrial [Source:VB Community Annotation]	6.44819e-07	1.07669	0.571	0.121	0.00846712	C_2
AGAP009949		oxidoreductase GLYR1 homolog [Source:VB Community Annotation]	2.74585e-08	1.07494	0.81	0.203	0.000360557	C_2
AGAP002301		bud site selection protein 31 [Source:VB Community Annotation]	4.94652e-08	1.07237	0.524	0.087	0.000649528	C_2
AGAP001491		Leucine-rich repeat-containing protein 57 [Source:VB Community Annotation]	4.42052e-09	1.06673	0.571	0.087	5.80458e-05	C_2
AGAP008803		Vesicle coat complex COPII	2.12123e-09	1.06425	0.714	0.134	2.78539e-05	C_2
AGAP004933		ankyrin repeat and MYND domain-containing protein 2 [Source:VB Community Annotation]	1.12243e-08	1.06346	0.667	0.121	0.000147386	C_2
AGAP009459	cdk1	cyclin-dependent kinase 1 [Source:VB Community Annotation]	1.35236e-08	1.0626	0.571	0.1	0.000177579	C_2
AGAP000757		peptide-O-fucosyltransferase [Source:VB Community Annotation]	7.01067e-09	1.06	0.81	0.186	9.20571e-05	C_2
AGAP003041		Unknown	9.85797e-08	1.05819	0.619	0.13	0.00129445	C_2
AGAP003560		UDP-glucose:glycoprotein glucosyltransferase [Source:VB Community Annotation]	1.28676e-10	1.05391	0.952	0.238	1.68965e-06	C_2
AGAP002387		acid phosphatase [Source:VB Community Annotation]	5.95728e-07	1.05391	0.619	0.139	0.0078225	C_2
AGAP012364		Unknown	6.86203e-10	1.0508	0.762	0.143	9.01054e-06	C_2
AGAP000402		Nogo-B receptor precursor [Source:VB Community Annotation]	1.07648e-07	1.05036	0.619	0.121	0.00141352	C_2
AGAP008857		COP9 signalosome complex subunit 8 [Source:VB Community Annotation]	1.22851e-06	1.05015	0.524	0.108	0.0161315	C_2
AGAP005744	LRIM26	leucine-rich immune protein (Coil-less) [Source:VB Community Annotation]	1.82602e-09	1.05006	0.857	0.19	2.39775e-05	C_2
AGAP001939		maltase [Source:VB Community Annotation]	3.02213e-08	1.04925	0.619	0.117	0.000396836	C_2
AGAP010852		Unknown	4.86513e-06	1.04889	0.524	0.117	0.063884	C_2
AGAP010029		transmembrane 9 superfamily member 2/4 [Source:VB Community Annotation]	9.74981e-07	1.04881	0.619	0.152	0.0128025	C_2
AGAP005240		Unknown	2.09386e-07	1.04876	0.571	0.113	0.00274944	C_2
AGAP006280		nuclear pore complex protein Nup210 [Source:VB Community Annotation]	9.41441e-07	1.04816	0.524	0.121	0.0123621	C_2
AGAP006949		AFG3 family protein [Source:VB Community Annotation]	2.28738e-06	1.04788	0.524	0.117	0.0300355	C_2
AGAP009687		U6 snRNA-associated Sm-like protein LSm4 [Source:VB Community Annotation]	2.02374e-08	1.04465	0.762	0.173	0.000265737	C_2
AGAP006951		YIP1 family member 1 [Source:VB Community Annotation]	3.38664e-06	1.04404	0.524	0.117	0.0444699	C_2
AGAP001549		3'-5' exonuclease	3.8267e-07	1.04007	0.571	0.117	0.00502484	C_2
AGAP009816		anterior pharynx defective 1 [Source:VB Community Annotation]	1.47908e-10	1.03962	0.81	0.143	1.94217e-06	C_2
AGAP000394		facilitated glucose transporter (solute carrier family 2) [Source:VB Community Annotation]	3.34133e-08	1.03752	0.619	0.121	0.000438749	C_2
AGAP010691		TNF receptor-associated protein 1 [Source:VB Community Annotation]	3.42389e-08	1.03708	0.714	0.16	0.000449591	C_2
AGAP004321		peptidyl-prolyl cis-trans isomerase NIMA-interacting 1 [Source:VB Community Annotation]	8.04944e-08	1.03678	0.667	0.143	0.00105697	C_2
AGAP003154		Transcription elongation factor B polypeptide 2 [Source:VB Community Annotation]	1.93893e-09	1.03455	0.905	0.216	2.546e-05	C_2
AGAP002118		zinc finger protein 622 [Source:VB Community Annotation]	2.44534e-07	1.03366	0.571	0.117	0.00321098	C_2
AGAP001484		AP-3 complex subunit mu [Source:VB Community Annotation]	2.5134e-08	1.03255	0.714	0.152	0.000330034	C_2
AGAP011964		Integrin alpha N-terminal domain superfamily	2.85532e-10	1.03188	1	0.229	3.74932e-06	C_2
AGAP005560		microspherule protein 1 [Source:VB Community Annotation]	5.65798e-08	1.02953	0.619	0.126	0.00074295	C_2
AGAP008263		pre-mRNA-processing factor 40 [Source:VB Community Annotation]	9.76499e-11	1.02725	0.714	0.126	1.28224e-06	C_2
AGAP004481	mRpS26	28S ribosomal protein S26%2C mitochondrial [Source:VB Community Annotation]	6.52913e-08	1.02688	0.571	0.1	0.000857341	C_2
AGAP003002		AdoMet-dependent rRNA methyltransferase [Source:VB Community Annotation]	4.90285e-08	1.0242	0.857	0.251	0.000643794	C_2
AGAP007244		Ribosome biogenesis protein WDR12 homolog [Source:UniProtKB/Swiss-Prot%3BAcc:Q7QJ33]	2.10527e-08	1.02355	0.857	0.203	0.000276443	C_2
AGAP002130		tubulin-specific chaperone A [Source:VB Community Annotation]	3.57543e-09	1.02344	0.81	0.177	4.6949e-05	C_2
AGAP002127		alpha-centractin [Source:VB Community Annotation]	1.53681e-06	1.02259	0.667	0.182	0.0201799	C_2
AGAP001975		Protein SYS1 homolog [Source:VB Community Annotation]	3.27264e-10	1.02223	0.571	0.078	4.2973e-06	C_2
AGAP004709	mRpL18	39S ribosomal protein L18%2C mitochondrial [Source:VB Community Annotation]	5.37735e-09	1.02194	0.714	0.134	7.06099e-05	C_2
AGAP006688		signal recognition particle receptor subunit beta [Source:VB Community Annotation]	6.18155e-09	1.02123	0.905	0.216	8.11699e-05	C_2
AGAP003296		LETM1 and EF-hand domain-containing protein 1%2C mitochondrial precursor [Source:VB Community Annotation]	3.54632e-06	1.01867	0.619	0.177	0.0465667	C_2
AGAP000809		Proteasome 26S non-ATPase subunit 10 [Source:VB Community Annotation]	2.4968e-07	1.01859	0.524	0.095	0.00327855	C_2
AGAP003179		E3 ubiquitin-protein ligase synoviolin [Source:VB Community Annotation]	7.42202e-06	1.01637	0.524	0.121	0.0974585	C_2
AGAP010420		valyl-tRNA synthetase [Source:VB Community Annotation]	8.72713e-06	1.01633	0.524	0.134	0.114596	C_2
AGAP002800		gephyrin [Source:VB Community Annotation]	1.87299e-07	1.00911	0.571	0.117	0.00245942	C_2
AGAP000433		Ras-related protein Rab-39B [Source:VB Community Annotation]	1.25707e-06	1.00904	0.619	0.152	0.0165066	C_2
AGAP006097		target of Myb-like protein 2 [Source:VB Community Annotation]	1.49192e-07	1.0086	0.81	0.221	0.00195904	C_2
AGAP009507		ubiquitin thioesterase protein OTUB1 [Source:VB Community Annotation]	9.12694e-10	1.00809	0.762	0.143	1.19846e-05	C_2
AGAP011084		ATP-dependent RNA helicase DDX27 [Source:VB Community Annotation]	2.19992e-07	1.00729	0.667	0.16	0.00288871	C_2
AGAP001302		RNA polymerase II-associated factor 1 [Source:VB Community Annotation]	1.7031e-07	1.00561	0.619	0.13	0.00223634	C_2
AGAP011286		optic atrophy protein 1 [Source:VB Community Annotation]	3.28759e-08	1.00546	0.714	0.173	0.000431694	C_2
AGAP012106		F-type H+-transporting ATPase subunit beta [Source:VB Community Annotation]	3.96696e-09	1.00496	0.905	0.221	5.20901e-05	C_2
AGAP004640		Zinc finger, RING-type	2.4032e-06	1.00275	0.524	0.117	0.0315564	C_2
AGAP002073		E3 ubiquitin-protein ligase RNF1/2 [Source:VB Community Annotation]	2.70185e-08	1.0013	0.524	0.082	0.00035478	C_2
AGAP012228		NGG1 interacting factor 3-like protein [Source:VB Community Annotation]	1.51026e-06	1.00069	0.524	0.108	0.0198312	C_2
AGAP028941	LSU_rRNA_eukarya	Eukaryotic large subunit ribosomal RNA [Source:RFAM%3BAcc:RF02543]	3.86087e-08	-1.00795	1	0.991	0.00050697	C_2
AGAP028382	ND4	NADH dehydrogenase subunit 4 [Source:European Nucleotide Archive%3BAcc:ND4]	2.76494e-06	-1.23405	1	0.944	0.0363064	C_2
AGAP028389	ND1	NADH dehydrogenase subunit 1 [Source:European Nucleotide Archive%3BAcc:ND1]	4.48622e-06	-1.2367	1	0.944	0.0589085	C_2
AGAP028364	COX1	cytochrome c oxidase subunit I [Source:European Nucleotide Archive%3BAcc:COX1]	3.28639e-07	-1.24705	1	0.996	0.00431535	C_2
AGAP028371	COX3	cytochrome c oxidase subunit III [Source:European Nucleotide Archive%3BAcc:COX3]	2.64841e-07	-1.26984	1	0.987	0.00347762	C_2
AGAP028387	CYTB	cytochrome b [Source:European Nucleotide Archive%3BAcc:CYTB]	2.83072e-07	-1.28752	1	0.987	0.00371702	C_2
AGAP028366	COX2	cytochrome c oxidase subunit II [Source:European Nucleotide Archive%3BAcc:COX2]	3.28545e-07	-1.29047	1	0.97	0.00431413	C_2
AGAP028370	ATP6	adenosine triphosphatase subunit 6 [Source:European Nucleotide Archive%3BAcc:ATP6]	6.42305e-07	-1.30829	1	0.983	0.00843411	C_2
AGAP028391	lsu rRNA	lsu rRNA	2.39603e-07	-1.32583	1	0.987	0.00314623	C_2
AGAP028380	ND5	NADH dehydrogenase subunit 5 [Source:European Nucleotide Archive%3BAcc:ND5]	3.68669e-07	-1.35455	1	0.961	0.00484099	C_2
AGAP028373	ND3	NADH dehydrogenase subunit 3 [Source:European Nucleotide Archive%3BAcc:ND3]	7.27871e-07	-1.42974	1	0.926	0.00955767	C_2
AGAP028369	ATP8	adenosine triphosphatase subunit 8 [Source:European Nucleotide Archive%3BAcc:ATP8]	8.33202e-06	-1.48608	0.905	0.879	0.109408	C_2
AGAP012291	CYP9J3	cytochrome P450 [Source:VB Community Annotation]	9.60807e-12	1.72982	0.679	0.183	1.26164e-07	C_3
AGAP006327	LRIM6	leucine-rich immune protein (Short) [Source:VB Community Annotation]	1.85664e-12	1.61052	0.75	0.223	2.43795e-08	C_3
AGAP011517		Unknown	1.41038e-07	1.57926	0.571	0.188	0.00185197	C_3
AGAP013128	CYP6AA2	cytochrome P450 [Source:VB Community Annotation]	1.01905e-09	1.45835	0.679	0.188	1.33812e-05	C_3
AGAP012813		Unknown	8.45417e-13	1.39955	0.821	0.29	1.11012e-08	C_3
AGAP012292	CYP9J4	cytochrome P450 [Source:VB Community Annotation]	1.12114e-09	1.3904	0.679	0.219	1.47216e-05	C_3
AGAP000091		methylsterol monooxygenase [Source:VB Community Annotation]	4.44801e-07	1.37409	0.571	0.201	0.00584068	C_3
AGAP003521		alpha-2-macroglobulin receptor-associated protein [Source:VB Community Annotation]	2.52185e-08	1.37304	0.643	0.237	0.000331144	C_3
AGAP009621		alpha-N-acetylgalactosaminidase [Source:VB Community Annotation]	6.28347e-16	1.33766	0.964	0.344	8.25083e-12	C_3
AGAP002419	CYP4D22	cytochrome P450 [Source:VB Community Annotation]	1.88693e-07	1.32384	0.607	0.219	0.00247773	C_3
AGAP009842		ribonuclease T2 [Source:VB Community Annotation]	1.53363e-06	1.30331	0.536	0.188	0.020138	C_3
AGAP009033	HPX2	heme peroxidase 2 [Source:VB Community Annotation]	7.99304e-08	1.29772	0.571	0.165	0.00104957	C_3
AGAP007418		proteasome inhibitor subunit 1 (PI31) [Source:VB Community Annotation]	4.43776e-08	1.29183	0.643	0.241	0.000582722	C_3
AGAP028038		Tetratricopeptide repeat domain	6.9075e-12	1.29031	0.821	0.29	9.07024e-08	C_3
AGAP001873		Unknown	3.24529e-06	1.28134	0.607	0.286	0.0426139	C_3
AGAP008387		Unknown	4.13656e-06	1.25002	0.607	0.268	0.0543172	C_3
AGAP002061		26S proteasome regulatory subunit N7 [Source:VB Community Annotation]	1.07801e-09	1.24487	0.75	0.295	1.41553e-05	C_3
AGAP006100		syntaxin 8 [Source:VB Community Annotation]	8.31022e-07	1.2363	0.571	0.201	0.0109122	C_3
AGAP028045		Tob (transducer of ErbB2)/antiproliferative gene family	2.54885e-06	1.23036	0.571	0.219	0.0334689	C_3
AGAP006209		carboxypeptidase B [Source:VB Community Annotation]	1.33088e-07	1.21184	0.643	0.25	0.00174757	C_3
AGAP004948		duplex-specific nuclease [Source:VB Community Annotation]	2.22541e-07	1.20566	0.679	0.317	0.00292219	C_3
AGAP002862	CYP6AA1	cytochrome P450 [Source:VB Community Annotation]	1.00478e-09	1.19947	0.821	0.357	1.31938e-05	C_3
AGAP012357		Vanin-like protein 1 [Source:VB Community Annotation]	8.1858e-07	1.19021	0.643	0.254	0.0107488	C_3
AGAP000290	CLIPA27	CLIP-domain serine protease [Source:VB Community Annotation]	1.13032e-12	1.18993	0.893	0.379	1.48423e-08	C_3
AGAP001942		2-keto-4-pentenoate hydratase/2-oxohepta-3-ene-1	1.40516e-06	1.18867	0.607	0.237	0.0184511	C_3
AGAP010052		carbonic anhydrase [Source:VB Community Annotation]	3.15104e-06	1.18669	0.571	0.232	0.0413764	C_3
AGAP000975		Angiotensin II, type I receptor-associated	6.5721e-10	1.18372	0.75	0.281	8.62982e-06	C_3
AGAP005674		Miple [Source:VB Community Annotation]	7.34211e-15	1.17024	1	0.469	9.64093e-11	C_3
AGAP011984		UDP-N-acetyl-alpha-D-galactosamine:polypeptide N-acetylgalactosaminyltransferase 20 [Source:VB Community Annotation]	1.08157e-10	1.16633	0.857	0.362	1.42021e-06	C_3
AGAP005914	SP11644	serine-type carboxypeptidase activity	9.2758e-09	1.15244	0.75	0.326	0.000121801	C_3
AGAP004428		Midline fasciclin [Source:VB Community Annotation]	3.97613e-09	1.13165	0.821	0.397	5.22105e-05	C_3
AGAP006243		phosphatidylinositol-4%2C5-bisphosphate 4-phosphatase [Source:VB Community Annotation]	3.14797e-09	1.12886	0.786	0.371	4.1336e-05	C_3
AGAP003304		CREG/Cellular Repressor of E1A- and JH-stimulated Genes	1.82597e-14	1.1267	0.964	0.397	2.39768e-10	C_3
AGAP000092		methylsterol monooxygenase [Source:VB Community Annotation]	3.18888e-15	1.12148	1	0.424	4.18732e-11	C_3
AGAP003720		annexin A4 [Source:VB Community Annotation]	1.80678e-08	1.11978	0.75	0.29	0.000237249	C_3
AGAP001242		defective proboscis extension response [Source:VB Community Annotation]	3.83989e-08	1.10913	0.75	0.304	0.000504216	C_3
AGAP003722	ANXB10C	annexin B10C [Source:VB Community Annotation]	2.77044e-07	1.09778	0.714	0.277	0.00363786	C_3
AGAP002414		carboxypeptidase D [Source:VB Community Annotation]	8.41629e-07	1.09436	0.714	0.348	0.0110514	C_3
AGAP002016		iron/zinc purple acid phosphatase-like protein precursor [Source:VB Community Annotation]	5.49101e-08	1.08515	0.75	0.335	0.000721025	C_3
AGAP011833		enoyl-CoA hydratase [Source:VB Community Annotation]	1.01407e-07	1.07857	0.714	0.308	0.00133158	C_3
AGAP004210		7TM GPCR, serpentine receptor class h (Srh)	6.36348e-08	1.07433	0.75	0.29	0.000835588	C_3
AGAP004426		midline fasciclin	1.13348e-06	1.0684	0.679	0.33	0.0148837	C_3
AGAP009672		Unknown	6.71483e-07	1.06557	0.714	0.335	0.00881724	C_3
AGAP003408		aldose reductase [Source:VB Community Annotation]	8.51328e-12	1.06162	0.929	0.424	1.11788e-07	C_3
AGAP001613		protein disulfide isomerase activity	8.99165e-06	1.05772	0.607	0.304	0.118069	C_3
AGAP005528		Bax inhibitor 1-related	1.21769e-08	1.04216	0.786	0.384	0.000159895	C_3
AGAP005662		acyl-CoA dehydrogenase [Source:VB Community Annotation]	1.65425e-06	1.03019	0.679	0.326	0.0217219	C_3
AGAP003721	ANXB10B	annexin B10B [Source:VB Community Annotation]	5.60108e-11	1.02567	0.893	0.406	7.35478e-07	C_3
AGAP000167		Lipid storage droplets surface-binding protein 2 [Source:VB Community Annotation]	2.74115e-11	1.02114	0.929	0.442	3.5994e-07	C_3
AGAP009493	alpha9	nicotinic acetylcholine receptor subunit alpha 9 [Source:VB Community Annotation]	3.4218e-13	1.01406	0.964	0.455	4.49317e-09	C_3
AGAP009510		Malate dehydrogenase (Fragment) [Source:UniProtKB/TrEMBL%3BAcc:Q7PSB4]	2.85982e-08	1.00954	0.786	0.362	0.000375523	C_3
AGAP003652		aldehyde dehydrogenase (NAD+) [Source:VB Community Annotation]	1.67038e-06	1.00836	0.714	0.353	0.0219338	C_3
AGAP008502		L-xylulose reductase [Source:VB Community Annotation]	3.85721e-09	1.00593	0.786	0.317	5.06491e-05	C_3
AGAP028120	D7L3	D7 long form salivary protein [Source:VB Community Annotation]	6.86074e-08	1.00418	0.75	0.393	0.000900884	C_3
AGAP009623	GAPDH	glyceraldehyde 3-phosphate dehydrogenase [Source:VB Community Annotation]	1.4664e-07	1.00188	0.714	0.339	0.00192552	C_3
AGAP001616		Unknown	1.94206e-06	1.00122	0.679	0.308	0.0255012	C_3
AGAP003162		Unc-13 ortholog 4B	5.51893e-07	1.00047	0.714	0.335	0.0072469	C_3
AGAP003155		UPF0483 protein AGAP003155 [Source:VB Community Annotation]	1.49442e-12	1.34938	0.638	0.166	1.96232e-08	C_4
AGAP001745		26S proteasome regulatory subunit RPN2 [Source:VB Community Annotation]	7.51626e-09	1.29481	0.532	0.166	9.8696e-05	C_4
AGAP009179		nucleolar protein 6 [Source:VB Community Annotation]	1.68618e-09	1.24364	0.511	0.137	2.21412e-05	C_4
AGAP004158		UDP-sugar diphosphatase [Source:VB Community Annotation]	4.49051e-09	1.19913	0.574	0.19	5.89649e-05	C_4
AGAP012705		NADH dehydrogenase (ubiquinone) 1 alpha subcomplex 7 [Source:VB Community Annotation]	2.60106e-10	1.19088	0.574	0.146	3.41545e-06	C_4
AGAP011581	mRpL12	39S ribosomal protein L12%2C mitochondrial [Source:VB Community Annotation]	9.85226e-13	1.18688	0.745	0.215	1.2937e-08	C_4
AGAP003220		CHK kinase-like	6.63601e-09	1.17083	0.617	0.239	8.71375e-05	C_4
AGAP007967		selenide%2C water dikinase [Source:VB Community Annotation]	7.38754e-09	1.15756	0.574	0.185	9.70058e-05	C_4
AGAP012111		sphingolipid delta-4 desaturase [Source:VB Community Annotation]	6.17393e-08	1.14115	0.511	0.156	0.000810699	C_4
AGAP007941		serine palmitoyltransferase [Source:VB Community Annotation]	6.88441e-13	1.13941	0.809	0.268	9.03992e-09	C_4
AGAP002071	ABCD1	ATP-binding cassette transporter (ABC transporter) family D member 1 [Source:VB Community Annotation]	8.30843e-08	1.13819	0.511	0.166	0.00109098	C_4
AGAP006383		oligosaccharyltransferase complex subunit beta [Source:VB Community Annotation]	3.09224e-12	1.1249	0.787	0.288	4.06043e-08	C_4
AGAP002390		Unknown	7.82149e-11	1.09897	0.66	0.2	1.02704e-06	C_4
AGAP000270		nucleolar protein 53 [Source:VB Community Annotation]	2.47214e-08	1.09254	0.574	0.19	0.000324617	C_4
AGAP004786		Pyruvate dehydrogenase E1 component subunit alpha [Source:UniProtKB/TrEMBL%3BAcc:Q7Q2S3]	3.68952e-08	1.0917	0.511	0.146	0.000484471	C_4
AGAP007202		poly(A) RNA binding	4.1567e-13	1.08381	0.83	0.293	5.45817e-09	C_4
AGAP006946		Prefoldin subunit 4 [Source:UniProtKB/TrEMBL%3BAcc:Q7QIM0]	2.18122e-12	1.07984	0.702	0.2	2.86415e-08	C_4
AGAP012177		Aveugle [Source:VB Community Annotation]	4.411e-09	1.07792	0.617	0.2	5.79208e-05	C_4
AGAP004441		Ribosome biogenesis protein Nop16	8.05814e-10	1.07752	0.617	0.19	1.05811e-05	C_4
AGAP009336		RNA recognition motif domain	6.81405e-14	1.076	0.83	0.254	8.94753e-10	C_4
AGAP012113		ubiquitin carboxyl-terminal hydrolase L3 [Source:VB Community Annotation]	8.42545e-12	1.07347	0.702	0.21	1.10635e-07	C_4
AGAP000618		succinate dehydrogenase (ubiquinone) membrane anchor subunit [Source:VB Community Annotation]	1.25355e-13	1.07284	0.851	0.263	1.64604e-09	C_4
AGAP012647		sulfotransferase [Source:VB Community Annotation]	2.15086e-12	1.07166	0.745	0.21	2.8243e-08	C_4
AGAP011423		20S proteasome subunit beta 2 [Source:VB Community Annotation]	2.77426e-09	1.07134	0.638	0.229	3.64289e-05	C_4
AGAP009979		glycoprotein-N-acetylgalactosamine 3-beta-galactosyltransferase [Source:VB Community Annotation]	5.63651e-09	1.06591	0.66	0.239	7.4013e-05	C_4
AGAP009323		prohibitin 1 [Source:VB Community Annotation]	2.31691e-09	1.06251	0.617	0.195	3.04233e-05	C_4
AGAP012281	eIF3m	Eukaryotic translation initiation factor 3 subunit M [Source:UniProtKB/Swiss-Prot%3BAcc:Q7Q068]	8.86267e-13	1.06133	0.83	0.293	1.16376e-08	C_4
AGAP006996		mitochondrial translation elongation factor TU [Source:VB Community Annotation]	8.2763e-09	1.06038	0.617	0.229	0.000108676	C_4
AGAP009604		Farnesoic acid 0-methyl transferase	4.83941e-11	1.05634	0.681	0.2	6.35463e-07	C_4
AGAP005129		5'-methylthioadenosine phosphorylase [Source:VB Community Annotation]	3.93474e-08	1.05442	0.553	0.185	0.000516671	C_4
AGAP011244		rRNA 2'-O-methyltransferase fibrillarin [Source:VB Community Annotation]	3.98025e-08	1.05352	0.532	0.18	0.000522646	C_4
AGAP005569		casein kinase II subunit alpha [Source:VB Community Annotation]	5.76284e-11	1.04515	0.723	0.239	7.56719e-07	C_4
AGAP001136		tetratricopeptide repeat protein 35 [Source:VB Community Annotation]	2.1992e-10	1.0445	0.596	0.171	2.88777e-06	C_4
AGAP002606		26S proteasome regulatory subunit N12 [Source:VB Community Annotation]	9.47119e-10	1.04442	0.681	0.244	1.24366e-05	C_4
AGAP013252		Unknown	4.06334e-09	1.04007	0.638	0.224	5.33558e-05	C_4
AGAP012301		N4-(beta-N-acetylglucosaminyl)-L-asparaginase [Source:VB Community Annotation]	6.21761e-08	1.03661	0.596	0.22	0.000816435	C_4
AGAP000325		lysyl-tRNA synthetase%2C class II [Source:VB Community Annotation]	1.88272e-08	1.03431	0.574	0.195	0.00024722	C_4
AGAP002568		Nat13 protein [Source:VB Community Annotation]	1.99421e-10	1.03383	0.617	0.176	2.61859e-06	C_4
AGAP000396	TPX1	thioredoxin peroxidase 1 [Source:VB Community Annotation]	3.84969e-11	1.0318	0.66	0.2	5.05503e-07	C_4
AGAP010308		nucleolar complex protein 3 [Source:VB Community Annotation]	6.6051e-11	1.03035	0.596	0.151	8.67315e-07	C_4
AGAP011535		transcription elongation factor B%2C polypeptide 1 [Source:VB Community Annotation]	1.64609e-09	1.02847	0.681	0.263	2.16148e-05	C_4
AGAP011315		fatty-acid amide hydrolase 2 [Source:VB Community Annotation]	1.46519e-10	1.02459	0.681	0.215	1.92394e-06	C_4
AGAP012648		Sulfotransferase	1.08803e-10	1.02255	0.723	0.239	1.42869e-06	C_4
AGAP001257		UTP--glucose-1-phosphate uridylyltransferase [Source:VB Community Annotation]	5.31e-07	1.02055	0.511	0.185	0.00697256	C_4
AGAP009119		suppressor of tumorigenicity protein 13 [Source:VB Community Annotation]	5.95029e-11	1.01958	0.702	0.234	7.81333e-07	C_4
AGAP000375		Coiled-coil-helix-coiled-coil-helix domain-containing protein 3, mitochondrial	2.91849e-12	1.019	0.809	0.273	3.83226e-08	C_4
AGAP011444		20S proteasome subunit beta 7 [Source:VB Community Annotation]	4.06145e-11	1.01864	0.745	0.229	5.33309e-07	C_4
AGAP003614		DUF788, TMEM208	4.86247e-07	1.01542	0.532	0.205	0.00638491	C_4
AGAP028604		Unknown	2.62257e-09	1.00786	0.681	0.239	3.44369e-05	C_4
AGAP012261		UDP-glucose 4-epimerase [Source:VB Community Annotation]	1.42427e-07	1.00478	0.574	0.205	0.00187021	C_4
AGAP006688		signal recognition particle receptor subunit beta [Source:VB Community Annotation]	1.41432e-08	1.00364	0.596	0.2	0.000185715	C_4
AGAP012813		Unknown	5.71066e-11	1.00199	0.787	0.249	7.49867e-07	C_4
AGAP009687		U6 snRNA-associated Sm-like protein LSm4 [Source:VB Community Annotation]	1.50386e-07	1.00143	0.511	0.156	0.00197472	C_4
AGAP028386	ND6	NADH dehydrogenase subunit 6 [Source:European Nucleotide Archive%3BAcc:ND6]	6.64071e-06	-1.45232	0.872	0.893	0.0871992	C_4
AGAP004203	Vg	vitellogenin [Source:VB Community Annotation]	2.80866e-07	-2.42329	0.128	0.507	0.00368806	C_4
AGAP028377	tRNA-Ser	Unknown	6.27582e-09	2.29746	0.658	0.369	8.24078e-05	C_5
AGAP028376	tRNA-Asn	Unknown	1.34237e-08	2.21273	0.605	0.29	0.000176266	C_5
AGAP028360	ND2	NADH dehydrogenase subunit 2 [Source:European Nucleotide Archive%3BAcc:ND2]	3.04293e-20	2.18789	0.974	0.874	3.99567e-16	C_5
AGAP028386	ND6	NADH dehydrogenase subunit 6 [Source:European Nucleotide Archive%3BAcc:ND6]	4.21565e-22	2.18223	1	0.869	5.53557e-18	C_5
AGAP028393	ssu rRNA	ssu rRNA	2.59164e-20	2.15925	0.974	0.813	3.40309e-16	C_5
AGAP028369	ATP8	adenosine triphosphatase subunit 8 [Source:European Nucleotide Archive%3BAcc:ATP8]	3.054e-22	2.13018	1	0.86	4.0102e-18	C_5
AGAP028373	ND3	NADH dehydrogenase subunit 3 [Source:European Nucleotide Archive%3BAcc:ND3]	5.51952e-20	2.03158	0.974	0.925	7.24768e-16	C_5
AGAP028375	tRNA-Ala	Unknown	8.79631e-09	2.01134	0.658	0.369	0.000115504	C_5
AGAP028374	tRNA-Arg	Unknown	1.57336e-10	1.99783	0.763	0.523	2.06598e-06	C_5
AGAP028380	ND5	NADH dehydrogenase subunit 5 [Source:European Nucleotide Archive%3BAcc:ND5]	5.10315e-20	1.99606	0.974	0.963	6.70094e-16	C_5
AGAP028370	ATP6	adenosine triphosphatase subunit 6 [Source:European Nucleotide Archive%3BAcc:ATP6]	2.87018e-22	1.98906	1	0.981	3.76884e-18	C_5
AGAP028391	lsu rRNA	lsu rRNA	3.63648e-22	1.98828	1	0.986	4.77506e-18	C_5
AGAP028366	COX2	cytochrome c oxidase subunit II [Source:European Nucleotide Archive%3BAcc:COX2]	3.22811e-22	1.98656	1	0.967	4.23883e-18	C_5
AGAP028387	CYTB	cytochrome b [Source:European Nucleotide Archive%3BAcc:CYTB]	3.15556e-22	1.98467	1	0.986	4.14356e-18	C_5
AGAP028372	tRNA-Gly	Unknown	3.6405e-06	1.97748	0.605	0.425	0.0478034	C_5
AGAP028371	COX3	cytochrome c oxidase subunit III [Source:European Nucleotide Archive%3BAcc:COX3]	2.93927e-22	1.9706	1	0.986	3.85956e-18	C_5
AGAP028364	COX1	cytochrome c oxidase subunit I [Source:European Nucleotide Archive%3BAcc:COX1]	3.63674e-22	1.95508	1	0.995	4.7754e-18	C_5
AGAP028389	ND1	NADH dehydrogenase subunit 1 [Source:European Nucleotide Archive%3BAcc:ND1]	4.52728e-18	1.867	0.947	0.949	5.94477e-14	C_5
AGAP028383	ND4L	NADH dehydrogenase subunit 4L [Source:European Nucleotide Archive%3BAcc:ND4L]	3.15419e-16	1.86369	0.921	0.907	4.14177e-12	C_5
AGAP028382	ND4	NADH dehydrogenase subunit 4 [Source:European Nucleotide Archive%3BAcc:ND4]	4.62426e-18	1.83885	0.947	0.949	6.07212e-14	C_5
AGAP028941	LSU_rRNA_eukarya	Eukaryotic large subunit ribosomal RNA [Source:RFAM%3BAcc:RF02543]	1.17435e-17	1.49377	0.947	1	1.54203e-13	C_5
AGAP028825	LSU_rRNA_eukarya	Eukaryotic large subunit ribosomal RNA [Source:RFAM%3BAcc:RF02543]	4.98061e-15	1.40285	0.921	0.977	6.54004e-11	C_5
AGAP007406		Elongation factor 1-alpha [Source:UniProtKB/TrEMBL%3BAcc:Q7PT29]	3.10107e-09	1.29488	0.842	0.953	4.07202e-05	C_5
AGAP028918	LSU_rRNA_eukarya	Eukaryotic large subunit ribosomal RNA [Source:RFAM%3BAcc:RF02543]	9.48054e-12	1.2025	0.868	1	1.24489e-07	C_5
AGAP011197	FBN9	FBN9	9.18281e-07	1.1127	0.842	0.883	0.012058	C_5
AGAP029054	NimB2	nimrod B2 [Source:VB Community Annotation]	6.16112e-10	1.07802	0.974	0.981	8.09016e-06	C_5
AGAP002076		heat shock 70kDa protein 1/8 [Source:VB Community Annotation]	1.42748e-07	1.06198	0.816	0.874	0.00187443	C_5
AGAP004936		EGF repeats	1.58017e-08	1.02834	0.868	0.981	0.000207492	C_5
AGAP007668	eIF3g	Eukaryotic translation initiation factor 3 subunit G [Source:UniProtKB/Swiss-Prot%3BAcc:Q7QJV0]	6.82824e-06	-1.00039	0.079	0.542	0.0896617	C_5
AGAP007237	HPX4	heme peroxidase 4 [Source:VB Community Annotation]	1.57283e-06	-1.00123	0.211	0.692	0.0206529	C_5
AGAP005558		peptidase (mitochondrial processing) beta [Source:VB Community Annotation]	1.73652e-07	-1.01062	0.053	0.575	0.00228022	C_5
AGAP000969		tropomodulin [Source:VB Community Annotation]	6.27139e-06	-1.01234	0.105	0.575	0.0823496	C_5
AGAP005611		Unknown	5.66469e-10	-1.02946	0.053	0.701	7.43831e-06	C_5
AGAP003711		V-type H+-transporting ATPase subunit I [Source:VB Community Annotation]	1.53958e-07	-1.03077	0.132	0.706	0.00202162	C_5
AGAP006068		DUF229	9.37224e-08	-1.03121	0.105	0.701	0.00123067	C_5
AGAP003439		Zinc finger, FLYWCH-type	1.95763e-08	-1.03353	0.079	0.664	0.000257056	C_5
AGAP012374		NADH dehydrogenase (ubiquinone) 1 beta subcomplex 3 [Source:VB Community Annotation]	1.84586e-06	-1.04671	0.053	0.523	0.024238	C_5
AGAP000268		Unknown	3.68766e-06	-1.06485	0.079	0.556	0.0484227	C_5
AGAP011629		dihydrolipoamide dehydrogenase [Source:VB Community Annotation]	5.03984e-07	-1.0713	0.079	0.579	0.00661781	C_5
AGAP006745		Ninjurin	7.52077e-06	-1.08347	0.105	0.556	0.0987552	C_5
AGAP004775		Xaa-Pro dipeptidase [Source:VB Community Annotation]	8.65448e-06	-1.08756	0.105	0.584	0.113642	C_5
AGAP008408		Unknown	8.62814e-06	-1.09243	0.079	0.514	0.113296	C_5
AGAP028439		Unknown	3.5433e-07	-1.10911	0.132	0.692	0.00465271	C_5
AGAP005625	SCRASP1	Class A Scavenger Receptor (SRCR domain) with Serine Protease domain. [Source:VB Community Annotation]	8.41626e-08	-1.11797	0.079	0.626	0.00110514	C_5
AGAP007103		calsyntenin-1 [Source:VB Community Annotation]	2.80057e-06	-1.12072	0.105	0.589	0.0367743	C_5
AGAP005134		F-type H+-transporting ATPase subunit alpha [Source:VB Community Annotation]	2.56306e-07	-1.12816	0.132	0.696	0.00336556	C_5
AGAP002878		Cystatin-like protein [Source:VB Community Annotation]	1.61517e-06	-1.13206	0.053	0.528	0.0212088	C_5
AGAP000005		high mobility group protein B1 [Source:VB Community Annotation]	2.59698e-07	-1.13213	0.079	0.621	0.00341009	C_5
AGAP000804	GPXH2	glutathione peroxidase 2 [Source:VB Community Annotation]	6.76626e-08	-1.13422	0.053	0.603	0.000888478	C_5
AGAP000849		NADH dehydrogenase (ubiquinone) 1 beta subcomplex 1 [Source:VB Community Annotation]	1.27023e-06	-1.15788	0.053	0.533	0.0166794	C_5
AGAP000964		3TM protein	2.39852e-09	-1.15965	0.053	0.673	3.1495e-05	C_5
AGAP010589		guanine nucleotide-binding protein subunit gamma [Source:VB Community Annotation]	3.47416e-07	-1.16309	0.079	0.589	0.00456192	C_5
AGAP000526		translation initiation factor 4B [Source:VB Community Annotation]	2.41254e-07	-1.19546	0.105	0.654	0.00316791	C_5
AGAP010010		oligosaccharyltransferase complex subunit gamma [Source:VB Community Annotation]	7.9022e-06	-1.19855	0.105	0.561	0.103764	C_5
AGAP006360		glutamate synthase (NADPH/NADH) [Source:VB Community Annotation]	7.53845e-07	-1.22475	0.053	0.533	0.00989874	C_5
AGAP003069		signal peptidase%2C endoplasmic reticulum-type [Source:VB Community Annotation]	2.54477e-07	-1.23403	0.053	0.57	0.00334154	C_5
AGAP011082		heat shock transcription factor%2C invertebrate [Source:VB Community Annotation]	1.19308e-06	-1.2355	0.053	0.523	0.0156664	C_5
AGAP009602		NADH dehydrogenase (ubiquinone) 1 beta subcomplex 6 [Source:VB Community Annotation]	2.42775e-07	-1.23665	0.026	0.519	0.00318787	C_5
AGAP008632		alpha-aminoadipic semialdehyde synthase [Source:VB Community Annotation]	8.3195e-07	-1.23959	0.079	0.584	0.0109243	C_5
AGAP002931	Arf2	ADP-ribosylation factor 2 [Source:VB Community Annotation]	3.73404e-08	-1.24285	0.026	0.561	0.000490317	C_5
AGAP001545		ribosomal biogenesis protein RLP24 [Source:VB Community Annotation]	3.45836e-06	-1.24798	0.053	0.505	0.0454117	C_5
AGAP003864		Unknown	2.42775e-07	-1.26336	0.026	0.519	0.00318787	C_5
AGAP009443		excitatory amino acid transporter 3 [Source:VB Community Annotation]	1.29939e-08	-1.26432	0.105	0.715	0.000170623	C_5
AGAP006607	eIF3i	Eukaryotic translation initiation factor 3 subunit I [Source:UniProtKB/Swiss-Prot%3BAcc:Q7PP77]	2.99957e-06	-1.27652	0.053	0.505	0.0393873	C_5
AGAP000044		thioredoxin domain-containing protein [Source:VB Community Annotation]	2.62082e-07	-1.2907	0.079	0.598	0.0034414	C_5
AGAP012755		ER lumen protein retaining receptor [Source:VB Community Annotation]	6.47074e-07	-1.33472	0.079	0.584	0.00849672	C_5
AGAP007583		golgi-associated plant pathogenesis-related protein 1 [Source:VB Community Annotation]	4.41435e-07	-1.34702	0.053	0.542	0.00579648	C_5
AGAP010552		mimitin%2C mitochondrial [Source:VB Community Annotation]	2.60037e-06	-1.35372	0.053	0.509	0.0341455	C_5
AGAP004916		FREP11	2.56548e-06	-1.35742	0.053	0.514	0.0336873	C_5
AGAP004739		H/ACA ribonucleoprotein complex subunit 4 [Source:VB Community Annotation]	6.51331e-07	-1.35793	0.105	0.607	0.00855263	C_5
AGAP007218		eukaryotic translation initiation factor 2%2C subunit 2 beta [Source:VB Community Annotation]	5.74795e-06	-1.37093	0.079	0.523	0.0754763	C_5
AGAP011940		sphingomyelin phosphodiesterase [Source:VB Community Annotation]	4.09577e-11	-1.37104	0.053	0.734	5.37815e-07	C_5
AGAP011504		protein transport protein SEC61 subunit beta [Source:VB Community Annotation]	1.97101e-08	-1.38239	0.053	0.626	0.000258813	C_5
AGAP009824		NADH dehydrogenase (ubiquinone) Fe-S protein 5 [Source:VB Community Annotation]	4.61686e-09	-1.38616	0.053	0.654	6.06239e-05	C_5
AGAP007172		translation initiation factor 4E [Source:VB Community Annotation]	2.40383e-06	-1.42933	0.053	0.514	0.0315647	C_5
AGAP007596		septin 7 [Source:VB Community Annotation]	5.11475e-07	-1.43143	0.053	0.547	0.00671617	C_5
AGAP007362		SH3 domain-binding glutamic acid-rich-like protein 3 [Source:VB Community Annotation]	2.52785e-06	-1.44376	0.079	0.551	0.0331932	C_5
AGAP001069		SURF-4	4.54578e-11	-1.45101	0.053	0.738	5.96907e-07	C_5
AGAP003304		CREG/Cellular Repressor of E1A- and JH-stimulated Genes	1.07286e-07	-1.45662	0.026	0.537	0.00140878	C_5
AGAP007609		DAZ associated protein 2	8.72227e-09	-1.45694	0.053	0.645	0.000114532	C_5
AGAP010225		ER lumen protein retaining receptor [Source:VB Community Annotation]	9.62793e-08	-1.48181	0.079	0.621	0.00126424	C_5
AGAP000321		Nucleoside phosphorylase	2.28954e-07	-1.51381	0.079	0.607	0.00300639	C_5
AGAP010623		X box-binding protein 1 [Source:VB Community Annotation]	6.40643e-06	-1.51712	0.079	0.514	0.0841228	C_5
AGAP012053		alpha%2Calpha-trehalase [Source:VB Community Annotation]	7.99071e-09	-1.52984	0.079	0.668	0.000104926	C_5
AGAP003277		cathepsin D [Source:VB Community Annotation]	3.1496e-07	-1.5403	0.053	0.565	0.00413573	C_5
AGAP028120	D7L3	D7 long form salivary protein [Source:VB Community Annotation]	4.40944e-07	-1.54508	0.026	0.505	0.00579004	C_5
AGAP003477		T-complex protein 1 subunit zeta [Source:VB Community Annotation]	3.35084e-07	-1.63608	0.053	0.542	0.00439998	C_5
AGAP004428		Midline fasciclin [Source:VB Community Annotation]	3.95045e-06	-1.67169	0.079	0.509	0.0518734	C_5
AGAP000290	CLIPA27	CLIP-domain serine protease [Source:VB Community Annotation]	3.61934e-07	-1.67343	0.026	0.509	0.00475256	C_5
AGAP000832		Derlin-2/3 [Source:VB Community Annotation]	7.93816e-07	-1.7204	0.053	0.537	0.0104236	C_5
AGAP009154	ARC-P34	actin-related protein 2/3 complex subunit 2 [Source:VB Community Annotation]	3.98412e-07	-1.72066	0.053	0.551	0.00523155	C_5
AGAP006216	GPRMTH2	methuselah receptor 2 [Source:VB Community Annotation]	8.83848e-07	-1.73129	0.053	0.537	0.0116058	C_5
AGAP028015		LRR	2.08963e-07	-1.75408	0.053	0.561	0.0027439	C_5
AGAP003878		LRR TM	6.5492e-09	-1.7544	0.053	0.65	8.59976e-05	C_5
AGAP001256		3'-phosphoadenosine 5'-phosphosulfate synthase [Source:VB Community Annotation]	4.00816e-09	-1.75667	0.026	0.607	5.26311e-05	C_5
AGAP004098		GTP-binding protein SAR1 [Source:VB Community Annotation]	8.18113e-08	-1.79992	0.079	0.607	0.00107426	C_5
AGAP012524		Unknown	5.4761e-08	-1.87657	0.026	0.551	0.000719067	C_5
AGAP006246		Sorcin [Source:VB Community Annotation]	2.80345e-07	-1.88127	0.026	0.514	0.00368122	C_5
AGAP004626		actin binding	5.89461e-07	-1.88339	0.053	0.537	0.00774021	C_5
AGAP010816	TEP3	thioester-containing protein 3 [Source:VB Community Annotation]	3.12629e-09	-1.93412	0.079	0.664	4.10513e-05	C_5
AGAP004559		Ras-related protein [Source:VB Community Annotation]	2.79363e-08	-2.04281	0.026	0.565	0.000366831	C_5
AGAP005813		FeS cluster assembly scaffold IscU [Source:VB Community Annotation]	1.80434e-08	-2.07065	0.026	0.575	0.000236927	C_5
AGAP012533		NADH dehydrogenase (ubiquinone) 1 alpha subcomplex 6 [Source:VB Community Annotation]	1.82116e-07	-2.07397	0.026	0.523	0.00239136	C_5
AGAP009850		ATP-binding cassette transporter (ABC transporter) family G member 7 [Source:VB Community Annotation]	2.13628e-07	-2.16864	0.026	0.519	0.00280515	C_5
AGAP000385		Unknown	5.01524e-10	-2.18745	0.053	0.664	6.58551e-06	C_5
AGAP004000		myosin IX [Source:VB Community Annotation]	2.04082e-08	-2.23037	0.026	0.565	0.000267981	C_5
AGAP005820		Unknown	5.4761e-08	-2.2383	0.026	0.551	0.000719067	C_5
AGAP005672		staphylococcal nuclease domain-containing protein 1 [Source:VB Community Annotation]	2.17098e-07	-2.23923	0.026	0.514	0.00285071	C_5
AGAP000308		proteasome activator subunit 3 (PA28 gamma) [Source:VB Community Annotation]	2.26584e-07	-2.30014	0.026	0.514	0.00297527	C_5
AGAP006890	Arf3	ADP-ribosylation factor 3 [Source:VB Community Annotation]	1.67024e-09	-2.30091	0.026	0.621	2.19319e-05	C_5
AGAP003721	ANXB10B	annexin B10B [Source:VB Community Annotation]	9.14883e-08	-2.32812	0.026	0.537	0.00120133	C_5
AGAP005674		Miple [Source:VB Community Annotation]	2.01874e-09	-2.3823	0.026	0.617	2.65081e-05	C_5
AGAP009156		BRICHOS domain	1.10307e-12	-2.4684	0.026	0.752	1.44844e-08	C_5
AGAP002032		hypothetical protein, possible vitellogenin	5.44264e-09	-2.5002	0.053	0.593	7.14673e-05	C_5
AGAP000092		methylsterol monooxygenase [Source:VB Community Annotation]	1.6893e-08	-2.55713	0.026	0.57	0.000221822	C_5
AGAP006340		misshapen/NIK-related kinase [Source:VB Community Annotation]	1.3261e-08	-3.06281	0	0.528	0.00017413	C_5
AGAP012307		Spondin-1 [Source:VB Community Annotation]	7.47444e-11	-3.17872	0.026	0.645	9.81468e-07	C_5
AGAP005380		UPF0220	1.65418e-08	-3.33362	0	0.523	0.000217211	C_5
AGAP005528		Bax inhibitor 1-related	3.94118e-08	-3.50995	0	0.505	0.000517517	C_5
AGAP012674		Unknown	3.39973e-09	-3.55302	0	0.556	4.46418e-05	C_5
AGAP003408		aldose reductase [Source:VB Community Annotation]	2.13073e-09	-3.59755	0	0.565	2.79787e-05	C_5
AGAP010224		ER lumen protein retaining receptor [Source:VB Community Annotation]	1.3262e-09	-3.65741	0	0.575	1.74143e-05	C_5
AGAP009569		syntenin-1 isoform 1 [Source:VB Community Annotation]	6.76508e-09	-3.68994	0	0.542	8.88323e-05	C_5
AGAP003553		Transmembrane emp24 protein transport domain containing 9 [Source:VB Community Annotation]	1.68247e-09	-3.71183	0	0.57	2.20925e-05	C_5
AGAP004867		V-type H+-transporting ATPase subunit G [Source:VB Community Annotation]	3.39973e-09	-3.74054	0	0.556	4.46418e-05	C_5
AGAP009651		CD63 antigen [Source:VB Community Annotation]	1.01936e-11	-3.86378	0	0.664	1.33852e-07	C_5
AGAP028235	Arthropod_7SK	Arthropod 7SK RNA [Source:RFAM%3BAcc:RF01052]	3.59025e-08	1.16399	0.512	0.167	0.000471436	C_6
AGAP028998	LSU_rRNA_eukarya	Eukaryotic large subunit ribosomal RNA [Source:RFAM%3BAcc:RF02543]	2.97413e-08	1.11611	0.674	0.354	0.000390533	C_6
AGAP004873		Unknown	3.65675e-15	1.99917	0.605	0.107	4.80168e-11	C_7
AGAP013474		Unknown	2.02548e-11	1.87262	0.526	0.112	2.65966e-07	C_7
AGAP004874		Unknown	7.69427e-14	1.79949	0.526	0.079	1.01033e-09	C_7
AGAP005165		Unknown	7.08686e-15	1.79703	0.658	0.145	9.30575e-11	C_7
AGAP002152	alpha6	nicotinic acetylcholine receptor subunit alpha 6 [Source:VB Community Annotation]	2.63965e-11	1.79435	0.579	0.15	3.46613e-07	C_7
AGAP003965		Unknown	4.07044e-12	1.7442	0.579	0.121	5.34489e-08	C_7
AGAP009995		anoctamin 10 [Source:VB Community Annotation]	2.89299e-14	1.73616	0.684	0.164	3.79879e-10	C_7
AGAP009412	Or50	odorant receptor 50 [Source:VB Community Annotation]	3.37651e-11	1.71716	0.605	0.178	4.43369e-07	C_7
AGAP005599		PH-sensitive chloride channel [Source:VB Community Annotation]	3.63367e-09	1.70386	0.553	0.159	4.77137e-05	C_7
AGAP010286		Unknown	1.88154e-10	1.68922	0.579	0.159	2.47064e-06	C_7
AGAP007788		E3 ubiquitin-protein ligase RNF31 [Source:VB Community Annotation]	3.20483e-11	1.68415	0.632	0.182	4.20826e-07	C_7
AGAP010281	GPRGBB1	putative GABA-B receptor 1 [Source:VB Community Annotation]	3.34748e-09	1.68273	0.526	0.145	4.39557e-05	C_7
AGAP001356	ACE1	Acetylcholinesterase [Source:UniProtKB/Swiss-Prot%3BAcc:Q869C3]	1.08159e-10	1.66321	0.553	0.131	1.42024e-06	C_7
AGAP000461		Odz%2C odd Oz/ten-m homolog 2 (Drosophila) [Source:VB Community Annotation]	2.9539e-10	1.62947	0.526	0.121	3.87877e-06	C_7
AGAP002104		Unknown	2.18315e-10	1.59617	0.579	0.154	2.86669e-06	C_7
AGAP004066		neurexin [Source:VB Community Annotation]	1.80179e-10	1.56522	0.579	0.159	2.36594e-06	C_7
AGAP002793		slit homolog 1 protein precursor [Source:VB Community Annotation]	7.93576e-09	1.55714	0.526	0.15	0.000104204	C_7
AGAP007585		Unknown	1.93343e-10	1.50192	0.658	0.215	2.53879e-06	C_7
AGAP000974		Unknown	1.17253e-08	1.49508	0.526	0.145	0.000153965	C_7
AGAP010024		Unknown	4.08978e-09	1.45767	0.579	0.168	5.37029e-05	C_7
AGAP006590		T-lymphoma invasion and metastasis-inducing protein 1 [Source:VB Community Annotation]	5.65882e-09	1.4548	0.526	0.164	7.4306e-05	C_7
AGAP001633		Fibronectin type 3 domain; Immunoglobulin (Ig)-like domain	2.83968e-07	1.44414	0.526	0.178	0.00372879	C_7
AGAP003945		olypyrimidine tract-binding protein 2 [Source:VB Community Annotation]	1.40811e-09	1.44323	0.553	0.154	1.84899e-05	C_7
AGAP000906		Unknown	2.10565e-10	1.43697	0.553	0.136	2.76493e-06	C_7
AGAP003656		Terribly reduced optic lobes%2C isoform B [Source:VB Community Annotation]	1.52182e-15	1.43361	0.816	0.238	1.9983e-11	C_7
AGAP002178		homeobox protein homothorax [Source:VB Community Annotation]	4.68007e-10	1.41235	0.526	0.121	6.1454e-06	C_7
AGAP007563		Unknown	3.70406e-15	1.41063	0.868	0.29	4.8638e-11	C_7
AGAP001410		Sidestep protein [Source:VB Community Annotation]	6.63703e-10	1.40955	0.553	0.145	8.71508e-06	C_7
AGAP004827		Unknown	3.4903e-09	1.40384	0.526	0.145	4.58312e-05	C_7
AGAP010023		Unknown	8.07699e-08	1.38304	0.526	0.173	0.00106059	C_7
AGAP001824		Unknown	9.05239e-09	1.37788	0.526	0.154	0.000118867	C_7
AGAP004367		Unknown	3.04424e-07	1.33816	0.526	0.178	0.0039974	C_7
AGAP001751		Oxidation resistance protein [Source:VB Community Annotation]	2.2802e-07	1.27348	0.605	0.252	0.00299413	C_7
AGAP009143	SCRAC1	Class A Scavenger Receptor (SRCR domain) with C-Type Lectin domain. [Source:VB Community Annotation]	1.19821e-08	1.26901	0.526	0.136	0.000157337	C_7
AGAP003709		potassium large conductance calcium-activated channel subfamily M alpha member [Source:VB Community Annotation]	8.76306e-11	1.26141	0.684	0.22	1.15068e-06	C_7
AGAP004707	para	voltage-gated sodium channel [Source:VB Community Annotation]	8.02804e-10	1.24207	0.632	0.192	1.05416e-05	C_7
AGAP007327	E74	E74-like factor 1/2/4 [Source:VB Community Annotation]	1.37302e-07	1.23913	0.526	0.168	0.00180291	C_7
AGAP008317		tyrosine-protein kinase Tec [Source:VB Community Annotation]	5.64663e-08	1.21849	0.553	0.178	0.000741459	C_7
AGAP010884		Unknown	5.44069e-09	1.20803	0.658	0.252	7.14417e-05	C_7
AGAP001690		regulating synaptic membrane exocytosis protein 2 [Source:VB Community Annotation]	8.20597e-14	1.2017	0.789	0.22	1.07753e-09	C_7
AGAP005008		Unknown	5.17809e-08	1.19785	0.632	0.266	0.000679935	C_7
AGAP008656	sema1a	semaphorin 6 [Source:VB Community Annotation]	3.46708e-08	1.19682	0.605	0.238	0.000455263	C_7
AGAP009424		Unknown	6.67292e-07	1.19597	0.526	0.192	0.00876221	C_7
AGAP028509		Unknown	5.32033e-09	1.16348	0.553	0.168	6.98612e-05	C_7
AGAP010413		SH3 and multiple ankyrin repeat domains protein [Source:VB Community Annotation]	1.47586e-07	1.16055	0.526	0.168	0.00193795	C_7
AGAP004169		Unknown	1.27956e-09	1.15602	0.605	0.192	1.68018e-05	C_7
AGAP003509		Complexin%2C isoform V [Source:VB Community Annotation]	4.50102e-08	1.15337	0.632	0.262	0.000591029	C_7
AGAP007086		Sodium channel protein [Source:UniProtKB/TrEMBL%3BAcc:Q7QIV0]	3.0717e-10	1.15256	0.632	0.192	4.03345e-06	C_7
AGAP010147		myosin heavy chain [Source:VB Community Annotation]	5.76483e-09	1.14491	0.658	0.243	7.5698e-05	C_7
AGAP005219		Unknown	5.11922e-09	1.14298	0.553	0.159	6.72205e-05	C_7
AGAP001660		ciliary dynein heavy chain [Source:VB Community Annotation]	3.61258e-07	1.12961	0.632	0.29	0.00474368	C_7
AGAP001577		forkhead box subgroup [Source:VB Community Annotation]	5.6014e-08	1.12656	0.605	0.215	0.00073552	C_7
AGAP007712		A-kinase anchor protein 13 [Source:VB Community Annotation]	7.32092e-06	1.12625	0.526	0.229	0.096131	C_7
AGAP008028		voltage-dependent calcium channel beta%2C invertebrate [Source:VB Community Annotation]	2.03835e-07	1.09418	0.526	0.168	0.00267656	C_7
AGAP004670		Unknown	4.87837e-06	1.08836	0.579	0.252	0.0640578	C_7
AGAP010088		ubiquitin carboxyl-terminal hydrolase 9/24 [Source:VB Community Annotation]	2.64366e-06	1.0559	0.605	0.262	0.0347139	C_7
AGAP009799	ABCC13	ATP-binding cassette transporter (ABC transporter) family C member 13 [Source:VB Community Annotation]	1.3753e-11	1.05239	0.658	0.173	1.8059e-07	C_7
AGAP009805	Gr9	gustatory receptor 9 [Source:VB Community Annotation]	5.26774e-06	1.04674	0.605	0.271	0.0691707	C_7
AGAP002578		Unknown	1.76122e-09	1.04574	0.632	0.206	2.31265e-05	C_7
AGAP028865	LSU_rRNA_eukarya	Eukaryotic large subunit ribosomal RNA [Source:RFAM%3BAcc:RF02543]	1.84256e-09	1.01239	0.605	0.187	2.41947e-05	C_7
AGAP028973	LSU_rRNA_eukarya	Eukaryotic large subunit ribosomal RNA [Source:RFAM%3BAcc:RF02543]	2.28962e-14	1.00504	0.895	0.374	3.0065e-10	C_7
AGAP011896	RpL31	60S ribosomal protein L31 [Source:VB Community Annotation]	1.54638e-06	-1.00264	0.421	0.799	0.0203056	C_7
AGAP002306	RpL4	60S ribosomal protein L4 [Source:VB Community Annotation]	3.96607e-07	-1.00474	0.5	0.827	0.00520784	C_7
AGAP005046	RpL22	60S ribosomal protein L22 [Source:VB Community Annotation]	7.24236e-07	-1.0118	0.447	0.804	0.00950995	C_7
AGAP028064	LRIM16B	leucine-rich immune protein (TM) [Source:VB Community Annotation]	1.39029e-06	-1.01684	0.447	0.762	0.0182559	C_7
AGAP005802	RpL8	60S ribosomal protein L8 [Source:UniProtKB/Swiss-Prot%3BAcc:Q9U9L2]	6.14452e-08	-1.02019	0.553	0.874	0.000806837	C_7
AGAP029054	NimB2	nimrod B2 [Source:VB Community Annotation]	2.5571e-12	-1.02246	0.947	0.986	3.35773e-08	C_7
AGAP009324	RpL34	60S ribosomal protein L34 [Source:VB Community Annotation]	3.66523e-07	-1.03648	0.474	0.813	0.00481281	C_7
AGAP006871	RpS4	40S ribosomal protein S4 [Source:UniProtKB/TrEMBL%3BAcc:Q7PT95]	1.05411e-07	-1.03945	0.526	0.846	0.00138415	C_7
AGAP003025	RpLp2	60S ribosomal protein LP2 [Source:VB Community Annotation]	3.08025e-07	-1.0535	0.474	0.846	0.00404468	C_7
AGAP002921	RpL36	60S ribosomal protein L36 [Source:UniProtKB/TrEMBL%3BAcc:Q7PQY8]	1.31552e-07	-1.05594	0.526	0.827	0.00172741	C_7
AGAP004016		Leucine-rich repeats (LRRs)	3.78554e-07	-1.05614	0.421	0.762	0.00497079	C_7
AGAP000953	RpL10-1	60S ribosomal protein L10-1 [Source:VB Community Annotation]	4.88533e-07	-1.05672	0.421	0.785	0.00641493	C_7
AGAP001274	RpS15	40S ribosomal protein S15 [Source:VB Community Annotation]	5.21123e-07	-1.05959	0.526	0.822	0.00684287	C_7
AGAP003816	RpL30	60S ribosomal protein L30 [Source:VB Community Annotation]	2.1852e-07	-1.06232	0.447	0.808	0.00286938	C_7
AGAP007087	RpL41	60s ribosomal protein L41 [Source:UniProtKB/TrEMBL%3BAcc:Q52P89]	4.30121e-08	-1.06436	0.553	0.883	0.000564791	C_7
AGAP013742		40S ribosomal protein S27a [Source:VB Community Annotation]	3.37208e-07	-1.06836	0.5	0.846	0.00442787	C_7
AGAP001910	RpS3	40S ribosomal protein S3 [Source:VB Community Annotation]	3.70035e-07	-1.07121	0.421	0.808	0.00485893	C_7
AGAP005131	RpS24	40S ribosomal protein S24 [Source:UniProtKB/TrEMBL%3BAcc:Q7PQ02]	2.67293e-07	-1.07132	0.553	0.832	0.00350983	C_7
AGAP005504		phospholipid scramblase 1 [Source:VB Community Annotation]	5.92086e-06	-1.07225	0.447	0.748	0.0777468	C_7
AGAP000541	RpS15a-1	40S ribosomal protein S15a [Source:VB Community Annotation]	1.16392e-06	-1.07577	0.421	0.804	0.0152834	C_7
AGAP003532	RpS3a	40S ribosomal protein S3a [Source:UniProtKB/Swiss-Prot%3BAcc:P52813]	2.44954e-09	-1.07619	0.658	0.897	3.2165e-05	C_7
AGAP003768	RpS2	40S ribosomal protein S2 [Source:VB Community Annotation]	3.69249e-08	-1.0784	0.579	0.883	0.000484861	C_7
AGAP009668		lysosomal-associated membrane protein 1/2 [Source:VB Community Annotation]	8.60553e-06	-1.08145	0.289	0.701	0.112999	C_7
AGAP011034		Odz%2C odd Oz/ten-m homolog 1 [Source:VB Community Annotation]	5.31447e-07	-1.08331	0.447	0.771	0.00697843	C_7
AGAP005960	RpL7a	60S ribosomal protein L7a [Source:UniProtKB/Swiss-Prot%3BAcc:O76732]	2.541e-08	-1.08386	0.526	0.85	0.000333658	C_7
AGAP011424	RpS16	40S ribosomal protein S16 [Source:VB Community Annotation]	9.05934e-08	-1.08687	0.447	0.841	0.00118958	C_7
AGAP006037	RpL24	60S ribosomal protein L24 [Source:VB Community Annotation]	1.12664e-07	-1.09133	0.526	0.846	0.0014794	C_7
AGAP010591	RpS20	40S ribosomal protein S20 [Source:VB Community Annotation]	6.89288e-07	-1.09361	0.447	0.827	0.00905104	C_7
AGAP007643		Tyrosine 3-monooxygenase/tryptophan 5-monooxygenase activation protein%2C beta polypeptide 2 [Source:VB Community Annotation]	3.36971e-08	-1.0962	0.421	0.841	0.000442477	C_7
AGAP010727		Mucin	3.79785e-08	-1.09742	0.421	0.808	0.000498696	C_7
AGAP004422	RpL19	60S ribosomal protein L19 [Source:VB Community Annotation]	1.22172e-08	-1.09971	0.5	0.832	0.000160423	C_7
AGAP009431	RpS21	40S ribosomal protein S21 [Source:UniProtKB/TrEMBL%3BAcc:Q7PTN4]	2.7478e-08	-1.09994	0.474	0.808	0.000360813	C_7
AGAP011054	TPX2	thioredoxin peroxidase 2 [Source:VB Community Annotation]	8.51263e-06	-1.10102	0.342	0.738	0.111779	C_7
AGAP008916	RpL7	60S ribosomal protein L7 [Source:VB Community Annotation]	1.27329e-08	-1.10516	0.579	0.893	0.000167196	C_7
AGAP004919	RpL15	60S ribosomal protein L15 [Source:UniProtKB/Swiss-Prot%3BAcc:P52818]	2.27388e-07	-1.10526	0.421	0.799	0.00298583	C_7
AGAP003663		ATP-dependent RNA helicase DBP2 [Source:VB Community Annotation]	7.62616e-06	-1.11535	0.289	0.673	0.100139	C_7
AGAP001064		Transmembrane emp24 domain-containing protein 10 precursor [Source:VB Community Annotation]	6.90668e-06	-1.11868	0.316	0.696	0.0906916	C_7
AGAP001911	RpL6	60S ribosomal protein L6 [Source:VB Community Annotation]	8.49026e-08	-1.12026	0.474	0.799	0.00111486	C_7
AGAP000807		helix-loop-helix transcription factor [Source:VB Community Annotation]	2.0317e-06	-1.12117	0.211	0.696	0.0266782	C_7
AGAP002437	RpS8	40S ribosomal protein S8 [Source:UniProtKB/TrEMBL%3BAcc:Q7QC42]	2.66572e-08	-1.12247	0.553	0.869	0.000350035	C_7
AGAP002667	Tctp	Translationally-controlled tumor protein homolog [Source:UniProtKB/Swiss-Prot%3BAcc:Q7QCK2]	1.53351e-07	-1.12263	0.579	0.822	0.00201366	C_7
AGAP000305		SPARC [Source:VB Community Annotation]	5.28823e-11	-1.12477	0.658	0.902	6.94398e-07	C_7
AGAP012407		protein disulfide-isomerase A1 [Source:VB Community Annotation]	5.02646e-07	-1.12856	0.368	0.743	0.00660025	C_7
AGAP011706	RpL27a	60S ribosomal protein L27a [Source:VB Community Annotation]	3.95748e-08	-1.12886	0.447	0.841	0.000519657	C_7
AGAP005991	RpL14	60S ribosomal protein L14 [Source:VB Community Annotation]	4.2007e-08	-1.13071	0.421	0.841	0.000551594	C_7
AGAP011284		Eukaryotic translation initiation factor 5A [Source:UniProtKB/TrEMBL%3BAcc:Q7PSR5]	6.79881e-08	-1.13094	0.474	0.827	0.000892751	C_7
AGAP010173	Rack1	guanine nucleotide-binding protein subunit beta-like protein [Source:VB Community Annotation]	1.54371e-07	-1.1359	0.395	0.827	0.00202705	C_7
AGAP001718		Unknown	8.63229e-06	-1.1375	0.289	0.65	0.113351	C_7
AGAP028439		Unknown	2.21042e-06	-1.13792	0.289	0.664	0.029025	C_7
AGAP012138	RpL21	60S ribosomal protein L21 [Source:VB Community Annotation]	1.658e-08	-1.13928	0.474	0.808	0.000217712	C_7
AGAP011228		FBN2	2.08708e-06	-1.14052	0.605	0.832	0.0274054	C_7
AGAP006459	SUI1	Protein translation factor SUI1 homolog [Source:UniProtKB/Swiss-Prot%3BAcc:P42678]	1.04973e-07	-1.14075	0.474	0.804	0.00137841	C_7
AGAP028154		V-type proton ATPase proteolipid subunit [Source:UniProtKB/TrEMBL%3BAcc:A0A1S4HCY4]	2.14524e-08	-1.14517	0.474	0.85	0.000281691	C_7
AGAP002655		putative splicing regulator	3.297e-06	-1.14925	0.158	0.626	0.0432929	C_7
AGAP007157	RpS27	40S ribosomal protein S27 [Source:UniProtKB/TrEMBL%3BAcc:Q7PT96]	2.92326e-07	-1.15754	0.368	0.794	0.00383853	C_7
AGAP010510		Tubulin beta chain [Source:UniProtKB/TrEMBL%3BAcc:Q7PPR6]	4.85947e-06	-1.15827	0.342	0.692	0.0638097	C_7
AGAP011131		F-type H+-transporting ATPase subunit d [Source:VB Community Annotation]	8.17377e-06	-1.16283	0.211	0.626	0.10733	C_7
AGAP007131		AP-2 complex subunit mu-1 [Source:VB Community Annotation]	1.61143e-06	-1.16483	0.237	0.696	0.0211597	C_7
AGAP004533		cathepsin B [Source:VB Community Annotation]	8.63872e-07	-1.16725	0.316	0.71	0.0113435	C_7
AGAP007699		GTP-binding nuclear protein Ran [Source:VB Community Annotation]	1.21886e-06	-1.16892	0.316	0.715	0.0160049	C_7
AGAP012284	RpL18a-1	60S ribosomal protein L18a [Source:UniProtKB/TrEMBL%3BAcc:Q7PV82]	1.16091e-07	-1.17041	0.421	0.822	0.00152439	C_7
AGAP002919	RpS6	40S ribosomal protein S6 [Source:VB Community Annotation]	5.22894e-08	-1.17127	0.421	0.841	0.000686612	C_7
AGAP000883		elongation factor 1-gamma [Source:VB Community Annotation]	2.2348e-07	-1.17206	0.342	0.757	0.00293451	C_7
AGAP006278		Odorant-binding protein 99a - Drosophila melanogaster	4.99277e-06	-1.17328	0.263	0.654	0.0655601	C_7
AGAP007312		Unknown	2.38206e-06	-1.17803	0.263	0.687	0.0312788	C_7
AGAP011197	FBN9	FBN9	1.0439e-09	-1.18395	0.632	0.921	1.37075e-05	C_7
AGAP003878		LRR TM	7.41855e-06	-1.18524	0.237	0.617	0.0974129	C_7
AGAP004212	Crc	calreticulin [Source:VB Community Annotation]	5.09559e-08	-1.18633	0.368	0.785	0.000669102	C_7
AGAP009200		collagen type IV alpha [Source:VB Community Annotation]	3.50332e-09	-1.19295	0.579	0.846	4.60021e-05	C_7
AGAP004918		fibrinogen [Source:VB Community Annotation]	9.22507e-06	-1.19777	0.263	0.645	0.121134	C_7
AGAP000655	RpS14-1	40S ribosomal protein S14a [Source:UniProtKB/Swiss-Prot%3BAcc:Q7QEH1]	4.67367e-08	-1.20478	0.342	0.776	0.000613699	C_7
AGAP000249		mannosyl-glycoprotein endo-beta-N-acetylglucosaminidase [Source:VB Community Annotation]	1.73841e-06	-1.20777	0.474	0.771	0.022827	C_7
AGAP028997	SSU_rRNA_eukarya	Eukaryotic small subunit ribosomal RNA [Source:RFAM%3BAcc:RF01960]	1.99383e-06	-1.21042	0.237	0.706	0.026181	C_7
AGAP010592	S7	40S ribosomal protein S7 [Source:UniProtKB/Swiss-Prot%3BAcc:P33514]	4.0342e-08	-1.21297	0.368	0.79	0.000529731	C_7
AGAP013333		Phosphate carrier%2C mitochondrial [Source:VB Community Annotation]	8.672e-07	-1.2152	0.289	0.701	0.0113872	C_7
AGAP012184		FK506-binding protein 1 [Source:VB Community Annotation]	1.83286e-06	-1.21616	0.289	0.706	0.0240673	C_7
AGAP006614		transcription factor BTF3 homolog 4 [Source:VB Community Annotation]	1.14665e-07	-1.21769	0.263	0.766	0.00150567	C_7
AGAP000790		Calycin-like	1.26548e-09	-1.22445	0.5	0.822	1.66171e-05	C_7
AGAP002754	RpL35a	60S ribosomal protein L35a [Source:VB Community Annotation]	7.95705e-10	-1.23274	0.447	0.888	1.04484e-05	C_7
AGAP001151		14-3-3 protein epsilon [Source:VB Community Annotation]	3.18645e-07	-1.23295	0.316	0.766	0.00418412	C_7
AGAP000952	RpL37	60S ribosomal protein L37 [Source:VB Community Annotation]	6.03397e-10	-1.23616	0.526	0.883	7.92321e-06	C_7
AGAP007927	RpL40	60S ribosomal protein L40 [Source:VB Community Annotation]	7.51245e-09	-1.23658	0.421	0.827	9.8646e-05	C_7
AGAP004395		nucleophosmin 3 [Source:VB Community Annotation]	2.5519e-07	-1.24361	0.289	0.71	0.0033509	C_7
AGAP005625	SCRASP1	Class A Scavenger Receptor (SRCR domain) with Serine Protease domain. [Source:VB Community Annotation]	9.47599e-06	-1.24971	0.211	0.603	0.124429	C_7
AGAP002076		heat shock 70kDa protein 1/8 [Source:VB Community Annotation]	5.24551e-11	-1.25464	0.632	0.907	6.88788e-07	C_7
AGAP009508	RpL9	60S ribosomal protein L9 [Source:VB Community Annotation]	7.37268e-09	-1.25678	0.395	0.827	9.68107e-05	C_7
AGAP004192		heat shock 70kDa protein 5 [Source:VB Community Annotation]	2.74799e-06	-1.26062	0.289	0.65	0.0360838	C_7
AGAP000462		peptidyl-prolyl isomerase F (cyclophilin D) [Source:VB Community Annotation]	7.86131e-07	-1.2671	0.395	0.734	0.0103227	C_7
AGAP010252	RpL23	60S ribosomal protein L23 [Source:VB Community Annotation]	4.80069e-09	-1.269	0.368	0.832	6.30378e-05	C_7
AGAP010163	RpL38	60S ribosomal protein L38 [Source:UniProtKB/Swiss-Prot%3BAcc:Q7Q0U1]	2.72304e-09	-1.27359	0.368	0.86	3.57562e-05	C_7
AGAP006958	Hsp83	Heat shock protein 83 [Source:UniProtKB/Swiss-Prot%3BAcc:Q7PT10]	4.96005e-08	-1.27865	0.368	0.794	0.000651304	C_7
AGAP008329	RpS5	40S ribosomal protein S5 [Source:VB Community Annotation]	4.74221e-09	-1.27915	0.395	0.822	6.227e-05	C_7
AGAP028970	LSU_rRNA_eukarya	Eukaryotic large subunit ribosomal RNA [Source:RFAM%3BAcc:RF02543]	4.41826e-06	-1.28178	0.263	0.715	0.0580161	C_7
AGAP012515		F-type H+-transporting ATPase subunit f [Source:VB Community Annotation]	1.89796e-07	-1.29785	0.184	0.72	0.00249221	C_7
AGAP001662		ADAM-TS Spacer 1	1.81651e-09	-1.30384	0.474	0.827	2.38526e-05	C_7
AGAP002395	RpL10-2	60S ribosomal protein L10-2 [Source:VB Community Annotation]	2.21383e-09	-1.3045	0.368	0.841	2.90698e-05	C_7
AGAP002122	RpL32	60S ribosomal protein L32 [Source:VB Community Annotation]	5.92436e-09	-1.30728	0.342	0.822	7.77928e-05	C_7
AGAP010608		Clathrin light chain [Source:UniProtKB/TrEMBL%3BAcc:Q5TSE5]	5.65731e-06	-1.30811	0.263	0.668	0.0742861	C_7
AGAP013103		Anopheles-specific TM protein	5.79096e-07	-1.31028	0.237	0.729	0.00760411	C_7
AGAP007088		peptidyl-prolyl cis-trans isomerase B (cyclophilin B) [Source:VB Community Annotation]	7.55253e-08	-1.31031	0.289	0.738	0.000991723	C_7
AGAP011802	RpL39	60S ribosomal protein L39 [Source:VB Community Annotation]	2.67804e-08	-1.32245	0.342	0.799	0.000351654	C_7
AGAP001381		laminin%2C beta 1 [Source:VB Community Annotation]	5.08973e-09	-1.32255	0.474	0.813	6.68333e-05	C_7
AGAP000109		cytochrome c oxidase subunit VIIa [Source:VB Community Annotation]	2.38464e-06	-1.32436	0.184	0.64	0.0313127	C_7
AGAP028028	LRIM16A	leucine-rich immune protein (TM) [Source:VB Community Annotation]	1.7194e-08	-1.32625	0.5	0.776	0.000225775	C_7
AGAP007237	HPX4	heme peroxidase 4 [Source:VB Community Annotation]	1.9051e-06	-1.33422	0.342	0.668	0.0250159	C_7
AGAP007366		Uncharacterised protein family, CD034/YQF4	9.29e-07	-1.33674	0.263	0.682	0.0121987	C_7
AGAP001470		Phosphoinositide-dependent kinase 1	1.22155e-07	-1.33799	0.447	0.729	0.00160402	C_7
AGAP011173	RpL11	60S ribosomal protein L11 [Source:VB Community Annotation]	1.66442e-09	-1.34944	0.421	0.85	2.18555e-05	C_7
AGAP006961		molecular chaperone HtpG [Source:VB Community Annotation]	3.35551e-06	-1.34967	0.237	0.664	0.0440612	C_7
AGAP002468	RpL26	60S ribosomal protein L26 [Source:VB Community Annotation]	7.49075e-10	-1.35492	0.421	0.86	9.8361e-06	C_7
AGAP003325		NADH dehydrogenase (ubiquinone) 1 alpha subcomplex 4 [Source:VB Community Annotation]	1.76746e-07	-1.35902	0.211	0.701	0.00232085	C_7
AGAP003538	RpL36a	60S ribosomal protein L36a [Source:VB Community Annotation]	2.84268e-09	-1.36481	0.368	0.813	3.73272e-05	C_7
AGAP007209		Tetraspanin [Source:UniProtKB/TrEMBL%3BAcc:Q7PTA7]	2.21188e-07	-1.36641	0.263	0.696	0.00290443	C_7
AGAP008724		mitochondrial cytochrome c oxidase subunit 5B isoform 1 [Source:VB Community Annotation]	6.47752e-06	-1.37466	0.211	0.636	0.0850563	C_7
AGAP001595	RpS29	40S ribosomal protein S29 [Source:VB Community Annotation]	3.11132e-08	-1.37814	0.263	0.752	0.000408548	C_7
AGAP002599		polyubiquitin [Source:VB Community Annotation]	1.15068e-07	-1.37999	0.316	0.724	0.00151096	C_7
AGAP013509		carboxylesterase clade H%2C member 1 [Source:VB Community Annotation]	3.78399e-08	-1.38071	0.289	0.729	0.000496875	C_7
AGAP001548		Stress-associated endoplasmic reticulum protein 2 [Source:VB Community Annotation]	3.05537e-07	-1.38172	0.237	0.71	0.00401201	C_7
AGAP006612	RpL29	60S ribosomal protein L29 [Source:VB Community Annotation]	1.10867e-08	-1.38189	0.263	0.785	0.000145579	C_7
AGAP012053		alpha%2Calpha-trehalase [Source:VB Community Annotation]	9.57915e-07	-1.38763	0.237	0.64	0.0125784	C_7
AGAP028979	SSU_rRNA_eukarya	Eukaryotic small subunit ribosomal RNA [Source:RFAM%3BAcc:RF01960]	3.40563e-06	-1.38765	0.158	0.636	0.0447193	C_7
AGAP011940		sphingomyelin phosphodiesterase [Source:VB Community Annotation]	3.84441e-07	-1.38909	0.316	0.687	0.0050481	C_7
AGAP002594		apolipoprotein D [Source:VB Community Annotation]	4.16488e-08	-1.39976	0.342	0.743	0.00054689	C_7
AGAP005947	RpS13	40S ribosomal protein S13 [Source:UniProtKB/Swiss-Prot%3BAcc:P52811]	5.89482e-09	-1.40472	0.342	0.808	7.74048e-05	C_7
AGAP001408	RpL35	60S ribosomal protein L35 [Source:VB Community Annotation]	5.82157e-09	-1.41155	0.316	0.79	7.6443e-05	C_7
AGAP007629	LANB2	laminin gamma 1 [Source:VB Community Annotation]	1.93983e-09	-1.43576	0.342	0.799	2.54719e-05	C_7
AGAP004017	LRR8	Leucine rich repeat (LRR)	8.27684e-09	-1.43652	0.368	0.748	0.000108683	C_7
AGAP007768		mitochondrial cytochrome c oxidase subunit VIC [Source:VB Community Annotation]	1.85994e-06	-1.43671	0.184	0.64	0.0244229	C_7
AGAP004944		heat shock 70kDa protein 1/8 [Source:VB Community Annotation]	6.04929e-06	-1.44118	0.132	0.561	0.0794332	C_7
AGAP003412	RpS28	40S ribosomal protein S28 [Source:VB Community Annotation]	5.75225e-08	-1.44386	0.211	0.729	0.000755328	C_7
AGAP009493	alpha9	nicotinic acetylcholine receptor subunit alpha 9 [Source:VB Community Annotation]	3.25804e-06	-1.44768	0.132	0.579	0.0427813	C_7
AGAP012990	RpS23	40S ribosomal protein S23 [Source:VB Community Annotation]	3.95571e-11	-1.45619	0.368	0.879	5.19424e-07	C_7
AGAP005775		Bax inhibitor 1 [Source:VB Community Annotation]	4.00231e-07	-1.46081	0.211	0.65	0.00525543	C_7
AGAP004917		fibrinogen-related protein 1 [Source:VB Community Annotation]	5.40264e-06	-1.46757	0.184	0.57	0.0709421	C_7
AGAP002464		secreted ferritin G subunit [Source:VB Community Annotation]	3.01425e-11	-1.46862	0.395	0.836	3.95802e-07	C_7
AGAP003069		signal peptidase%2C endoplasmic reticulum-type [Source:VB Community Annotation]	6.91412e-06	-1.46933	0.158	0.551	0.0907893	C_7
AGAP010957		calmodulin [Source:VB Community Annotation]	2.21963e-07	-1.4706	0.211	0.664	0.0029146	C_7
AGAP004098		GTP-binding protein SAR1 [Source:VB Community Annotation]	8.48233e-07	-1.47085	0.105	0.603	0.0111382	C_7
AGAP009031	RpL5	60S ribosomal protein L5 [Source:VB Community Annotation]	6.29258e-10	-1.47375	0.342	0.827	8.26279e-06	C_7
AGAP011828	Cp1	cathepsin L [Source:VB Community Annotation]	6.99879e-08	-1.47818	0.316	0.72	0.000919011	C_7
AGAP007580	RpL18	60S ribosomal protein L18 [Source:UniProtKB/Swiss-Prot%3BAcc:Q7QJM5]	6.06182e-10	-1.47844	0.368	0.813	7.95978e-06	C_7
AGAP000415		5-hydroxyisourate hydrolase [Source:VB Community Annotation]	7.14589e-07	-1.48281	0.158	0.626	0.00938327	C_7
AGAP010216	RpL25	60S ribosomal protein L25 [Source:VB Community Annotation]	2.92833e-09	-1.48447	0.289	0.762	3.84519e-05	C_7
AGAP012374		NADH dehydrogenase (ubiquinone) 1 beta subcomplex 3 [Source:VB Community Annotation]	3.6405e-06	-1.48533	0.079	0.519	0.0478034	C_7
AGAP003477		T-complex protein 1 subunit zeta [Source:VB Community Annotation]	8.84583e-06	-1.48661	0.132	0.528	0.116155	C_7
AGAP010929	tubB	Tubulin beta chain [Source:UniProtKB/TrEMBL%3BAcc:Q7PSI4]	7.78755e-06	-1.48848	0.105	0.551	0.102258	C_7
AGAP000927		myosin regulatory light chain%2C invertebrate [Source:VB Community Annotation]	2.48022e-09	-1.4898	0.289	0.766	3.25677e-05	C_7
AGAP001930		heterogeneous nuclear ribonucleoprotein 27C [Source:VB Community Annotation]	8.50946e-07	-1.49689	0.184	0.617	0.0111738	C_7
AGAP011974	SCRC1	Class C Scavenger Receptor (Sushi/SCR/CCP and Somatomedin B domains). [Source:VB Community Annotation]	1.09008e-09	-1.49875	0.342	0.766	1.43138e-05	C_7
AGAP007621		cytochrome c oxidase VIIc [Source:VB Community Annotation]	1.90964e-07	-1.5042	0.158	0.668	0.00250755	C_7
AGAP002879		cathepsin F [Source:VB Community Annotation]	5.03879e-07	-1.50662	0.316	0.664	0.00661643	C_7
AGAP001264		Plasma glutamate carboxypeptidase [Source:VB Community Annotation]	4.95318e-07	-1.50931	0.237	0.64	0.00650402	C_7
AGAP005611		Unknown	1.12491e-07	-1.51131	0.184	0.678	0.00147711	C_7
AGAP000815	INTB	integrin beta subunit [Source:VB Community Annotation]	2.4608e-06	-1.51968	0.105	0.561	0.0323128	C_7
AGAP005685		Learning associated protein 18-like	6.52605e-06	-1.52134	0.105	0.542	0.0856935	C_7
AGAP010876		molecular chaperone DnaK [Source:VB Community Annotation]	2.20409e-07	-1.532	0.184	0.65	0.00289419	C_7
AGAP005061	RpS9	40S ribosomal protein S9 [Source:VB Community Annotation]	1.58149e-10	-1.54494	0.289	0.818	2.07665e-06	C_7
AGAP007473		FK506-binding nuclear protein [Source:VB Community Annotation]	8.09753e-06	-1.56014	0.158	0.556	0.106329	C_7
AGAP007966		F-type H+-transporting ATPase subunit gamma [Source:VB Community Annotation]	2.0668e-06	-1.56232	0.158	0.584	0.0271392	C_7
AGAP005935		UPF0197	5.6564e-06	-1.56237	0.132	0.565	0.0742742	C_7
AGAP012708		Unknown	4.92293e-09	-1.56654	0.184	0.78	6.46429e-05	C_7
AGAP000852		Small ubiquitin-related modifier [Source:UniProtKB/TrEMBL%3BAcc:Q7PNJ2]	7.05923e-09	-1.57269	0.184	0.724	9.26948e-05	C_7
AGAP029055	eater	Eater	2.24343e-08	-1.57705	0.184	0.692	0.000294584	C_7
AGAP000804	GPXH2	glutathione peroxidase 2 [Source:VB Community Annotation]	7.35835e-07	-1.59157	0.132	0.589	0.00966225	C_7
AGAP000523		F-type H+-transporting ATPase subunit c [Source:VB Community Annotation]	1.14287e-07	-1.60173	0.158	0.673	0.00150071	C_7
AGAP008822		FK506-binding protein 14 [Source:VB Community Annotation]	9.29429e-09	-1.60227	0.211	0.706	0.000122043	C_7
AGAP009491		F-type H+-transporting ATPase subunit g [Source:VB Community Annotation]	1.3539e-07	-1.60376	0.184	0.682	0.0017778	C_7
AGAP005427	RpL28	60S ribosomal protein L28 [Source:VB Community Annotation]	5.45809e-12	-1.60702	0.316	0.86	7.16702e-08	C_7
AGAP006959		molecular chaperone HtpG [Source:VB Community Annotation]	6.1493e-07	-1.61415	0.184	0.631	0.00807464	C_7
AGAP004349		K homology RNA-binding domain	1.62739e-09	-1.61827	0.211	0.762	2.13693e-05	C_7
AGAP001502		mitochondrial 10 kDa heat shock protein [Source:VB Community Annotation]	7.94572e-07	-1.62905	0.132	0.598	0.0104335	C_7
AGAP006745		Ninjurin	1.7805e-06	-1.64245	0.105	0.556	0.0233798	C_7
AGAP000385		Unknown	1.47058e-07	-1.64366	0.184	0.64	0.00193102	C_7
AGAP003430	VhaM8.9	vacuolar H+ ATPase M8.9 accessory subunit [Source:VB Community Annotation]	2.628e-06	-1.64415	0.132	0.561	0.0345083	C_7
AGAP004247	GPXH1	glutathione peroxidase 1 [Source:VB Community Annotation]	1.49506e-06	-1.65272	0.132	0.584	0.0196316	C_7
AGAP011119		Lysozyme, I type	6.0956e-07	-1.65465	0.158	0.617	0.00800413	C_7
AGAP000669		Unknown	1.60006e-06	-1.65503	0.105	0.57	0.0210104	C_7
AGAP005558		peptidase (mitochondrial processing) beta [Source:VB Community Annotation]	1.76948e-06	-1.66841	0.132	0.561	0.0232351	C_7
AGAP000044		thioredoxin domain-containing protein [Source:VB Community Annotation]	1.19236e-06	-1.67406	0.184	0.579	0.0156569	C_7
AGAP010010		oligosaccharyltransferase complex subunit gamma [Source:VB Community Annotation]	1.41589e-06	-1.67836	0.105	0.561	0.018592	C_7
AGAP009647		proteasome maturation protein [Source:VB Community Annotation]	8.43893e-06	-1.6791	0.105	0.519	0.110812	C_7
AGAP029038	SSU_rRNA_eukarya	Eukaryotic small subunit ribosomal RNA [Source:RFAM%3BAcc:RF01960]	3.49254e-09	-1.68131	0.184	0.752	4.58606e-05	C_7
AGAP009201		collagen type IV alpha [Source:VB Community Annotation]	2.22429e-10	-1.68284	0.211	0.78	2.92071e-06	C_7
AGAP000849		NADH dehydrogenase (ubiquinone) 1 beta subcomplex 1 [Source:VB Community Annotation]	2.94414e-06	-1.68569	0.079	0.528	0.0386595	C_7
AGAP003277		cathepsin D [Source:VB Community Annotation]	1.15905e-06	-1.69326	0.105	0.556	0.0152195	C_7
AGAP010612		elongation factor 1-beta [Source:VB Community Annotation]	9.11172e-08	-1.69679	0.105	0.631	0.00119646	C_7
AGAP010310		eukaryotic peptide chain release factor subunit [Source:VB Community Annotation]	6.84164e-06	-1.72374	0.105	0.505	0.0898376	C_7
AGAP010174		oligosaccharyltransferase complex subunit alpha (ribophorin I) [Source:VB Community Annotation]	3.94936e-06	-1.73805	0.132	0.533	0.051859	C_7
AGAP006921		CED6	2.68794e-07	-1.74365	0.211	0.626	0.00352954	C_7
AGAP005820		Unknown	1.15943e-06	-1.75039	0.079	0.542	0.0152245	C_7
AGAP012056		cofilin [Source:VB Community Annotation]	1.47974e-10	-1.75229	0.132	0.771	1.94305e-06	C_7
AGAP011580	eIF3k	Eukaryotic translation initiation factor 3 subunit K [Source:UniProtKB/Swiss-Prot%3BAcc:Q7QGK4]	1.02692e-06	-1.76242	0.079	0.537	0.0134845	C_7
AGAP013092		cytochrome c oxidase subunit VIb polypeptide 1 [Source:VB Community Annotation]	1.30747e-07	-1.76334	0.079	0.603	0.00171684	C_7
AGAP004616		F-type H+-transporting ATPase subunit 6 [Source:VB Community Annotation]	7.80175e-07	-1.76792	0.132	0.593	0.0102445	C_7
AGAP002346	RpS14-2	40S ribosomal protein S14b [Source:UniProtKB/Swiss-Prot%3BAcc:Q7QBX2]	6.26989e-10	-1.7685	0.184	0.766	8.233e-06	C_7
AGAP002265		splicing factor%2C arginine/serine-rich 12 [Source:VB Community Annotation]	7.46094e-06	-1.78588	0.132	0.514	0.0979696	C_7
AGAP002338		vacuolar protein sorting 29 homolog [Source:VB Community Annotation]	7.4929e-07	-1.80065	0.079	0.551	0.00983893	C_7
AGAP003119		translation initiation factor 1A [Source:VB Community Annotation]	9.77856e-09	-1.81899	0.158	0.664	0.000128402	C_7
AGAP009572	RpS15a-2	40S ribosomal protein S15a [Source:VB Community Annotation]	6.07761e-09	-1.83638	0.132	0.692	7.9805e-05	C_7
AGAP028015		LRR	2.89621e-07	-1.84557	0.079	0.556	0.00380302	C_7
AGAP007393		protein disulfide isomerase family A%2C member 3 [Source:VB Community Annotation]	4.85207e-09	-1.8476	0.263	0.696	6.37125e-05	C_7
AGAP003864		Unknown	1.43848e-06	-1.85382	0.053	0.514	0.0188887	C_7
AGAP007609		DAZ associated protein 2	7.41144e-08	-1.85538	0.184	0.621	0.000973197	C_7
AGAP011629		dihydrolipoamide dehydrogenase [Source:VB Community Annotation]	6.76171e-07	-1.85645	0.132	0.57	0.00887881	C_7
AGAP004031		mitochondrial electron transfer flavoprotein subunit alpha [Source:VB Community Annotation]	5.25589e-07	-1.87988	0.079	0.542	0.00690152	C_7
AGAP001928		nucleosome assembly protein 1-like 1 [Source:VB Community Annotation]	1.73864e-07	-1.90569	0.158	0.603	0.00228301	C_7
AGAP004721		N-acetylglucosamine-6-sulfatase [Source:VB Community Annotation]	4.22738e-08	-1.91455	0.053	0.593	0.000555097	C_7
AGAP008000		sepiapterin reductase [Source:VB Community Annotation]	1.93989e-06	-1.93269	0.158	0.561	0.0254727	C_7
AGAP012307		Spondin-1 [Source:VB Community Annotation]	1.80514e-08	-1.93515	0.132	0.626	0.000237033	C_7
AGAP009738	GRX3	glutaredoxin [Source:VB Community Annotation]	3.48034e-06	-1.94729	0.105	0.528	0.0457004	C_7
AGAP005865		fumarylacetoacetase [Source:VB Community Annotation]	4.81141e-06	-1.94938	0.105	0.505	0.0631787	C_7
AGAP001701		Small ubiquitin-related modifier [Source:UniProtKB/TrEMBL%3BAcc:Q7PY16]	3.37159e-07	-1.95278	0.105	0.565	0.00442724	C_7
AGAP010589		guanine nucleotide-binding protein subunit gamma [Source:VB Community Annotation]	4.54541e-08	-1.96512	0.079	0.589	0.000596857	C_7
AGAP000092		methylsterol monooxygenase [Source:VB Community Annotation]	2.32387e-07	-1.98681	0.079	0.561	0.00305148	C_7
AGAP010337		ubiquinol-cytochrome c reductase subunit 8 [Source:VB Community Annotation]	4.11968e-08	-2.00361	0.079	0.607	0.000540955	C_7
AGAP001971		Polyubiquitin-C [Source:VB Community Annotation]	4.50867e-08	-2.00878	0.105	0.621	0.000592033	C_7
AGAP002759		T-complex protein 1 subunit gamma [Source:UniProtKB/TrEMBL%3BAcc:Q7QCQ5]	2.26955e-07	-2.0109	0.053	0.537	0.00298015	C_7
AGAP007638		oligosaccharyltransferase complex subunit delta (ribophorin II) [Source:VB Community Annotation]	1.75144e-06	-2.03002	0.105	0.514	0.0229982	C_7
AGAP011107	GRX1	glutaredoxin [Source:VB Community Annotation]	7.96636e-07	-2.04522	0.079	0.537	0.0104606	C_7
AGAP010580		Farnesoic acid 0-methyl transferase	1.47586e-10	-2.05694	0.105	0.72	1.93796e-06	C_7
AGAP005621		NADH dehydrogenase (ubiquinone) 1 alpha subcomplex 5 [Source:VB Community Annotation]	1.30652e-06	-2.05994	0.053	0.505	0.0171559	C_7
AGAP011159	CoVa	cytochrome c oxidase subunit Va [Source:VB Community Annotation]	1.09106e-08	-2.06721	0.079	0.626	0.000143268	C_7
AGAP003304		CREG/Cellular Repressor of E1A- and JH-stimulated Genes	5.94521e-07	-2.06887	0.079	0.528	0.00780665	C_7
AGAP006944	eIF3e	Eukaryotic translation initiation factor 3 subunit E [Source:UniProtKB/Swiss-Prot%3BAcc:Q7QIL8]	1.56613e-08	-2.07611	0.053	0.612	0.000205648	C_7
AGAP011076		ubiquitin-conjugating enzyme E2 I [Source:VB Community Annotation]	5.26994e-08	-2.08887	0.053	0.57	0.000691996	C_7
AGAP008727		cytochrome c oxidase subunit 4%2C mitochondrial precursor [Source:VB Community Annotation]	4.0172e-09	-2.16861	0.105	0.65	5.27498e-05	C_7
AGAP008491		oligosaccharyltransferase complex subunit epsilon [Source:VB Community Annotation]	1.32992e-07	-2.1952	0.079	0.57	0.00174632	C_7
AGAP000851		cytochrome c oxidase subunit 6a%2C mitochrondrial [Source:VB Community Annotation]	6.40756e-09	-2.19835	0.053	0.621	8.41377e-05	C_7
AGAP004296		signal peptidase complex subunit 1 [Source:VB Community Annotation]	2.83981e-07	-2.22469	0.053	0.537	0.00372895	C_7
AGAP002182	ABCE1	ATP-binding cassette transporter (ABC transporter) family E member 1 [Source:VB Community Annotation]	4.79074e-07	-2.26123	0.053	0.514	0.00629072	C_7
AGAP007297		NADH dehydrogenase (ubiquinone) 1 beta subcomplex 5 [Source:VB Community Annotation]	4.85753e-07	-2.31022	0.053	0.514	0.00637843	C_7
AGAP002401		V-type H+-transporting ATPase subunit E [Source:VB Community Annotation]	4.16972e-07	-2.31331	0.053	0.514	0.00547525	C_7
AGAP005749	GSTO1	glutathione S-transferase omega class 1 [Source:VB Community Annotation]	1.40078e-07	-2.31376	0.053	0.547	0.00183937	C_7
AGAP000358		Selenoprotein SelK/SelG	8.72581e-08	-2.35273	0.053	0.547	0.00114579	C_7
AGAP003599		F-type H+-transporting ATPase oligomycin sensitivity conferral protein [Source:VB Community Annotation]	1.15343e-08	-2.36397	0.105	0.612	0.000151457	C_7
AGAP003935	Prosalpha1	26S proteasome alpha 1 subunit [Source:VB Community Annotation]	1.56185e-07	-2.55338	0.053	0.523	0.00205087	C_7
AGAP010623		X box-binding protein 1 [Source:VB Community Annotation]	1.44776e-07	-2.66232	0.053	0.519	0.00190106	C_7
AGAP000268		Unknown	1.65271e-08	-2.67268	0.026	0.565	0.000217017	C_7
AGAP011842		signal peptidase complex subunit 2 [Source:VB Community Annotation]	8.20006e-08	-2.68843	0.026	0.528	0.00107675	C_7
AGAP008163		U4/U6 small nuclear ribonucleoprotein SNU13 [Source:VB Community Annotation]	1.61529e-08	-3.04133	0.026	0.547	0.000212104	C_7
AGAP004710		ubiquinol-cytochrome c reductase subunit 9 [Source:VB Community Annotation]	2.56149e-08	-3.4676	0	0.514	0.000336349	C_7
AGAP007664		coiled-coil domain-containing protein 34 [Source:VB Community Annotation]	5.6863e-23	2.52248	0.583	0.022	7.46667e-19	C_8
AGAP011112		Unknown	1.19203e-20	2.34019	0.542	0.022	1.56526e-16	C_8
AGAP002211	CYP325A1	cytochrome P450 [Source:VB Community Annotation]	2.05329e-20	2.30878	0.583	0.031	2.69617e-16	C_8
AGAP028094		Unknown	9.77423e-22	2.26048	0.625	0.031	1.28345e-17	C_8
AGAP005106		Unknown	4.07126e-25	2.24041	0.75	0.044	5.34598e-21	C_8
AGAP002165		broad [Source:VB Community Annotation]	1.82964e-19	2.22562	0.583	0.035	2.4025e-15	C_8
AGAP011625		transcription factor AP-2%2C invertebrate [Source:VB Community Annotation]	5.98665e-25	2.20547	0.708	0.035	7.86107e-21	C_8
AGAP003355		Unknown	5.63851e-24	2.19026	0.667	0.031	7.40393e-20	C_8
AGAP010221		Unknown	1.88373e-19	2.12721	0.542	0.026	2.47353e-15	C_8
AGAP028481		Unknown	2.9856e-18	2.12058	0.542	0.031	3.9204e-14	C_8
AGAP000123	CTLSE2	C-type lectin (CTL) [Source:VB Community Annotation]	1.56206e-17	2.11636	0.542	0.035	2.05114e-13	C_8
AGAP010327		SH3-binding domain kinase [Source:VB Community Annotation]	3.27159e-19	2.08324	0.625	0.044	4.29593e-15	C_8
AGAP012454		Unknown	2.94444e-17	2.07726	0.542	0.035	3.86634e-13	C_8
AGAP008980		LIM homeobox protein 2/9 [Source:VB Community Annotation]	4.15264e-19	2.06761	0.583	0.035	5.45283e-15	C_8
AGAP001476		Innexin inx2 [Source:VB Community Annotation]	2.03089e-16	2.05921	0.542	0.039	2.66677e-12	C_8
AGAP009706	Or70	odorant receptor 70 [Source:VB Community Annotation]	2.52781e-18	2.04931	0.542	0.031	3.31926e-14	C_8
AGAP006212		Unknown	7.21102e-18	2.04559	0.542	0.031	9.46879e-14	C_8
AGAP005138		Unknown	5.18672e-18	2.03458	0.542	0.031	6.81068e-14	C_8
AGAP004369		Beat IIb [Source:VB Community Annotation]	2.12911e-18	2.02803	0.625	0.048	2.79573e-14	C_8
AGAP001280		potassium inwardly-rectifying channel subfamily J [Source:VB Community Annotation]	1.16151e-22	1.98314	0.75	0.053	1.52518e-18	C_8
AGAP009549		Unknown	3.00894e-19	1.98288	0.542	0.026	3.95104e-15	C_8
AGAP009089		Unknown	6.86675e-15	1.96847	0.542	0.048	9.01673e-11	C_8
AGAP009042		Unknown	4.00693e-17	1.95636	0.625	0.057	5.2615e-13	C_8
AGAP004107		Unknown	7.33055e-21	1.95426	0.75	0.066	9.62574e-17	C_8
AGAP028706		Unknown	4.62936e-19	1.9542	0.583	0.035	6.07881e-15	C_8
AGAP008891		serine protease snake [Source:VB Community Annotation]	2.8431e-16	1.95363	0.625	0.061	3.73327e-12	C_8
AGAP006795	Aper1	peritrophin 1 [Source:VB Community Annotation]	2.54931e-16	1.94971	0.583	0.048	3.3475e-12	C_8
AGAP008200		potassium voltage-gated channel Shaw-related subfamily C%2C invertebrate [Source:VB Community Annotation]	1.91977e-16	1.94378	0.583	0.048	2.52085e-12	C_8
AGAP005996	CPR21	cuticular protein RR-1 family 21 [Source:VB Community Annotation]	4.09936e-22	1.94091	0.667	0.035	5.38287e-18	C_8
AGAP027999	AQP8	aquaporin	1.71187e-16	1.94036	0.583	0.044	2.24785e-12	C_8
AGAP006439		fringe [Source:VB Community Annotation]	3.21365e-15	1.93908	0.625	0.07	4.21984e-11	C_8
AGAP011631	Or11	odorant receptor 11 [Source:VB Community Annotation]	7.53758e-16	1.93044	0.583	0.053	9.89759e-12	C_8
AGAP003739		Unknown	1.65686e-15	1.92646	0.542	0.044	2.17562e-11	C_8
AGAP005589		Unknown	5.79721e-18	1.9214	0.583	0.039	7.61231e-14	C_8
AGAP009450		Unknown	6.9721e-20	1.91351	0.625	0.039	9.15506e-16	C_8
AGAP010628		Unknown	8.67107e-19	1.90876	0.75	0.075	1.1386e-14	C_8
AGAP011610		amiloride-sensitive sodium channel%2C other [Source:VB Community Annotation]	1.16986e-14	1.89128	0.583	0.061	1.53615e-10	C_8
AGAP009003		Unknown	2.34191e-17	1.88719	0.625	0.053	3.07516e-13	C_8
AGAP010145		yellow [Source:VB Community Annotation]	3.74556e-17	1.88276	0.625	0.053	4.91829e-13	C_8
AGAP004847	SCRB7	Class B Scavenger Receptor (CD36 domain). [Source:VB Community Annotation]	6.37627e-19	1.87216	0.792	0.088	8.37268e-15	C_8
AGAP000037		Unknown	2.36019e-16	1.86497	0.542	0.039	3.09917e-12	C_8
AGAP007089		Unknown	2.13744e-17	1.86326	0.667	0.066	2.80667e-13	C_8
AGAP010167		numb [Source:VB Community Annotation]	1.04117e-18	1.85614	0.583	0.035	1.36716e-14	C_8
AGAP007963		Sarcoplasmic calcium-binding protein [Source:VB Community Annotation]	3.88212e-16	1.85419	0.708	0.088	5.09761e-12	C_8
AGAP002855		Unknown	7.19246e-17	1.84747	0.625	0.053	9.44442e-13	C_8
AGAP010772		Unknown	3.61642e-17	1.84689	0.667	0.075	4.74872e-13	C_8
AGAP005002	GPRNNA18	putative GPCR class a orphan receptor 18 [Source:VB Community Annotation]	2.80137e-16	1.83124	0.583	0.048	3.67848e-12	C_8
AGAP001169	Gr49	gustatory receptor 49 [Source:VB Community Annotation]	5.2211e-14	1.82807	0.583	0.066	6.85583e-10	C_8
AGAP008893	CPLCP8	cuticular protein CPLCP8 [Source:VB Community Annotation]	1.73297e-17	1.81161	0.625	0.048	2.27556e-13	C_8
AGAP011666		Unknown	6.46166e-15	1.80499	0.625	0.07	8.4848e-11	C_8
AGAP010134		arrestin-1 [Source:VB Community Annotation]	2.86245e-18	1.80492	0.625	0.048	3.75868e-14	C_8
AGAP009978	DUOX	dual oxidase: peroxidase and NADPH-oxidase domains [Source:VB Community Annotation]	1.47428e-13	1.80205	0.542	0.057	1.93588e-09	C_8
AGAP005329		Unknown	2.31098e-15	1.80093	0.542	0.044	3.03455e-11	C_8
AGAP002115		Rap1 GTPase-activating protein 1 [Source:VB Community Annotation]	1.79108e-14	1.79688	0.625	0.075	2.35187e-10	C_8
AGAP004553		Unknown	2.95669e-17	1.79394	0.75	0.083	3.88243e-13	C_8
AGAP010489	OBP4	odorant-binding protein antennal 4 [Source:VB Community Annotation]	1.03315e-14	1.78105	0.583	0.057	1.35663e-10	C_8
AGAP008552	CYP4H27	cytochrome P450 [Source:VB Community Annotation]	3.94507e-14	1.76642	0.583	0.061	5.18027e-10	C_8
AGAP006183		slit protein [Source:VB Community Annotation]	2.82964e-15	1.76398	0.625	0.061	3.7156e-11	C_8
AGAP001409	OBP3	odorant-binding protein antennal 3 [Source:VB Community Annotation]	6.42993e-17	1.76197	0.667	0.066	8.44314e-13	C_8
AGAP005983		solute carrier family 38 (sodium-coupled neutral amino acid transporter) [Source:VB Community Annotation]	6.34427e-16	1.75369	0.542	0.044	8.33066e-12	C_8
AGAP004220		Unknown	5.37292e-17	1.74409	0.667	0.061	7.05518e-13	C_8
AGAP007463		Unknown	8.32531e-15	1.74164	0.583	0.057	1.0932e-10	C_8
AGAP002250		calcium/calmodulin-dependent protein kinase kinase [Source:VB Community Annotation]	1.34987e-20	1.73395	0.792	0.075	1.77251e-16	C_8
AGAP002172		POU domain transcription factor%2C class 4 [Source:VB Community Annotation]	1.19988e-15	1.73149	0.625	0.061	1.57556e-11	C_8
AGAP011667		Unknown	7.46587e-17	1.72841	0.708	0.075	9.80344e-13	C_8
AGAP012254		Polypeptide N-acetylgalactosaminyltransferase [Source:UniProtKB/TrEMBL%3BAcc:A0A1S4H9W3]	8.20811e-16	1.72719	0.625	0.066	1.07781e-11	C_8
AGAP009932		Unknown	4.446e-15	1.72667	0.625	0.066	5.83805e-11	C_8
AGAP009123		Unknown	5.50334e-17	1.72621	0.75	0.092	7.22643e-13	C_8
AGAP006585		Cysteine-rich venom protein [Source:VB Community Annotation]	9.45016e-15	1.72614	0.542	0.048	1.2409e-10	C_8
AGAP004858		Unknown	1.46975e-12	1.72122	0.583	0.075	1.92992e-08	C_8
AGAP010704		Unknown	8.56197e-19	1.71813	0.708	0.061	1.12427e-14	C_8
AGAP009683		sidestep protein [Source:VB Community Annotation]	1.29365e-14	1.71747	0.708	0.101	1.69869e-10	C_8
AGAP028711		Unknown	1.03036e-12	1.71439	0.542	0.061	1.35296e-08	C_8
AGAP009164		Unknown	1.03512e-15	1.71172	0.708	0.088	1.35922e-11	C_8
AGAP009408	Or14	odorant receptor 14 [Source:VB Community Annotation]	5.82993e-14	1.71117	0.542	0.053	7.65528e-10	C_8
AGAP011613		DBH-like monooxygenase protein 1 [Source:VB Community Annotation]	2.94839e-14	1.70808	0.583	0.061	3.87153e-10	C_8
AGAP002451	SCRB1	Class B Scavenger Receptor (CD36 domain). [Source:VB Community Annotation]	1.61674e-16	1.69805	0.667	0.07	2.12294e-12	C_8
AGAP005069		Unknown	2.72155e-16	1.69694	0.708	0.079	3.57367e-12	C_8
AGAP001485		Unknown	9.20427e-17	1.68988	0.708	0.075	1.20861e-12	C_8
AGAP007686		50 kDa dystrophin-associated glycoprotein [Source:VB Community Annotation]	6.55358e-20	1.68208	0.875	0.11	8.60551e-16	C_8
AGAP010627		Unknown	4.58243e-12	1.67928	0.542	0.066	6.01718e-08	C_8
AGAP008868		Unknown	1.28117e-14	1.67865	0.583	0.057	1.68231e-10	C_8
AGAP005289		myostatin [Source:VB Community Annotation]	1.16095e-12	1.67707	0.542	0.061	1.52444e-08	C_8
AGAP001676		actin%2C cytoplasmic [Source:VB Community Annotation]	1.48091e-13	1.67392	0.583	0.07	1.94459e-09	C_8
AGAP010335		NEL-LIKE PROTEIN 1 [Source:VB Community Annotation]	1.12062e-14	1.67081	0.667	0.083	1.47148e-10	C_8
AGAP011695		homeobox protein SIX1 [Source:VB Community Annotation]	6.75011e-14	1.66481	0.583	0.061	8.86357e-10	C_8
AGAP028470		Unknown	1.57225e-14	1.66259	0.583	0.061	2.06453e-10	C_8
AGAP009398	Or15	odorant receptor 15 [Source:VB Community Annotation]	7.77016e-12	1.6619	0.583	0.083	1.0203e-07	C_8
AGAP004646		homeobox protein HoxA/B/C/D4 [Source:VB Community Annotation]	3.88522e-15	1.6592	0.542	0.044	5.10168e-11	C_8
AGAP009385		cellular retinaldehyde-binding protein [Source:VB Community Annotation]	1.20414e-16	1.65239	0.75	0.096	1.58116e-12	C_8
AGAP028482		Unknown	1.26602e-13	1.65176	0.542	0.053	1.66241e-09	C_8
AGAP010326	AQP3	aquaporin [Source:VB Community Annotation]	2.28579e-15	1.65135	0.625	0.061	3.00147e-11	C_8
AGAP013771		Unknown	8.60219e-14	1.64983	0.542	0.053	1.12955e-09	C_8
AGAP011097		Unknown	1.23529e-16	1.64618	0.667	0.066	1.62206e-12	C_8
AGAP006968		solute carrier family 4 member 1 [Source:VB Community Annotation]	7.77642e-13	1.64139	0.583	0.075	1.02112e-08	C_8
AGAP004878		Unknown	2.28579e-15	1.64119	0.625	0.061	3.00147e-11	C_8
AGAP011218		Unknown	1.87049e-15	1.63789	0.542	0.039	2.45614e-11	C_8
AGAP011437	collier/knot	early B-cell factor [Source:VB Community Annotation]	1.36564e-15	1.63243	0.625	0.061	1.79322e-11	C_8
AGAP005072		Unknown	5.36319e-18	1.63202	0.75	0.075	7.0424e-14	C_8
AGAP008342		solute carrier family 24 (sodium/potassium/calcium exchanger)%2C member 2 [Source:VB Community Annotation]	4.1751e-15	1.62659	0.583	0.053	5.48233e-11	C_8
AGAP006609		Unknown	4.34173e-13	1.62461	0.542	0.057	5.70113e-09	C_8
AGAP011956		Unknown	2.45678e-12	1.62002	0.542	0.061	3.226e-08	C_8
AGAP013712		Unknown	1.03825e-13	1.61986	0.583	0.066	1.36333e-09	C_8
AGAP007343	LYSC2	C-type lysozyme [Source:VB Community Annotation]	5.54156e-12	1.61901	0.542	0.066	7.27663e-08	C_8
AGAP010256		Unknown	2.96079e-13	1.61781	0.542	0.053	3.88782e-09	C_8
AGAP011976		Unknown	9.25589e-16	1.61669	0.625	0.061	1.21539e-11	C_8
AGAP011062		hemoglobin (Heterodimeric) [Source:VB Community Annotation]	6.27981e-13	1.6154	0.542	0.057	8.24602e-09	C_8
AGAP003076	GPRGHP1	putative growth hormone releasing hormone receptor 1 [Source:VB Community Annotation]	2.36631e-15	1.6143	0.667	0.079	3.1072e-11	C_8
AGAP002125	Or34	odorant receptor 34 [Source:VB Community Annotation]	3.56413e-12	1.61245	0.583	0.075	4.68007e-08	C_8
AGAP003931		Unknown	1.19988e-15	1.61142	0.625	0.061	1.57556e-11	C_8
AGAP028537		Unknown	8.10938e-13	1.59535	0.542	0.061	1.06484e-08	C_8
AGAP009626		Kv channel-interacting protein 4 isoform 2 [Source:VB Community Annotation]	1.58755e-14	1.5953	0.583	0.057	2.08462e-10	C_8
AGAP006633		Syntrophin%2C gamma 2 [Source:VB Community Annotation]	1.85318e-14	1.59479	0.625	0.07	2.43341e-10	C_8
AGAP001566		Unknown	8.80506e-19	1.59392	0.875	0.123	1.15619e-14	C_8
AGAP010186		echinoid [Source:VB Community Annotation]	2.83446e-16	1.58604	0.708	0.079	3.72193e-12	C_8
AGAP006405		Unknown	2.18101e-16	1.58538	0.75	0.092	2.86388e-12	C_8
AGAP028523		Unknown	1.29084e-15	1.58473	0.833	0.14	1.695e-11	C_8
AGAP001185		sodium-coupled monocarboxylate transporter 1 [Source:VB Community Annotation]	1.97791e-12	1.58384	0.583	0.075	2.59719e-08	C_8
AGAP013444		Unknown	2.03862e-14	1.58051	0.542	0.048	2.67691e-10	C_8
AGAP004595	GPRGBB2	putative GABA-B receptor 2 [Source:VB Community Annotation]	4.94372e-15	1.57987	0.583	0.057	6.4916e-11	C_8
AGAP010239		DnaJ homolog subfamily B member 5 [Source:VB Community Annotation]	1.13829e-12	1.57855	0.625	0.088	1.49469e-08	C_8
AGAP009409	Or51	odorant receptor 51 [Source:VB Community Annotation]	1.31964e-11	1.57518	0.542	0.07	1.73282e-07	C_8
AGAP009007	GPRNNB1	putative GPCR class b orphan receptor 1 [Source:VB Community Annotation]	9.05361e-15	1.57281	0.667	0.079	1.18883e-10	C_8
AGAP009858	Gr3	gustatory receptor 3 [Source:VB Community Annotation]	5.14899e-15	1.57198	0.542	0.044	6.76113e-11	C_8
AGAP005713		Unknown	3.72814e-15	1.57162	0.75	0.101	4.89542e-11	C_8
AGAP008347	GPRRK	putative glycoprotein hormone rk-like receptor [Source:VB Community Annotation]	2.1103e-19	1.56918	0.667	0.048	2.77104e-15	C_8
AGAP006442		Unknown	2.50066e-13	1.56917	0.542	0.053	3.28362e-09	C_8
AGAP010294		Unknown	3.35482e-15	1.56502	0.625	0.061	4.40522e-11	C_8
AGAP001360		Unknown	4.49172e-14	1.56347	0.542	0.053	5.89808e-10	C_8
AGAP007935		Unknown	7.04202e-16	1.56194	0.75	0.096	9.24687e-12	C_8
AGAP000795		Unknown	9.51327e-16	1.55988	0.667	0.075	1.24919e-11	C_8
AGAP002090	COE16738	carboxylesterase [Source:VB Community Annotation]	2.04669e-12	1.55923	0.542	0.066	2.68751e-08	C_8
AGAP028491	AQP2	aquaporin [Source:VB Community Annotation]	2.1495e-18	1.55873	0.625	0.044	2.82251e-14	C_8
AGAP007078		Unknown	1.35754e-11	1.55742	0.583	0.083	1.78258e-07	C_8
AGAP001569		myosin alkali light chain 1 [Source:VB Community Annotation]	1.88362e-14	1.55666	0.583	0.057	2.47338e-10	C_8
AGAP003691		serine protease, snake?	1.64319e-12	1.55573	0.583	0.075	2.15768e-08	C_8
AGAP009583		Unknown	4.52901e-13	1.55471	0.625	0.083	5.94704e-09	C_8
AGAP028687		Unknown	1.92603e-15	1.55388	0.625	0.061	2.52907e-11	C_8
AGAP001085		Unknown	6.28079e-18	1.55117	0.833	0.101	8.24731e-14	C_8
AGAP028614		Unknown	1.72818e-16	1.5509	0.792	0.114	2.26928e-12	C_8
AGAP001487	shakB	Innexin shaking-B [Source:UniProtKB/Swiss-Prot%3BAcc:Q7PXN1]	5.78656e-13	1.54998	0.542	0.057	7.59834e-09	C_8
AGAP003244	GPRGHP2	putative growth hormone releasing hormone receptor 2 [Source:VB Community Annotation]	1.52593e-13	1.54922	0.625	0.075	2.00369e-09	C_8
AGAP013110		Unknown	2.10021e-12	1.54685	0.583	0.07	2.75779e-08	C_8
AGAP004675	GPRMAC2	putative muscarinic acetylcholine receptor 2 [Source:VB Community Annotation]	2.29306e-12	1.54393	0.583	0.075	3.01102e-08	C_8
AGAP003991		Unknown	2.8832e-13	1.54375	0.625	0.079	3.78593e-09	C_8
AGAP028432		Unknown	2.40009e-13	1.5429	0.667	0.092	3.15155e-09	C_8
AGAP009251		Trypsin-like serine protease	6.58051e-20	1.54262	0.833	0.088	8.64086e-16	C_8
AGAP009769		Unknown	4.43619e-14	1.5382	0.583	0.066	5.82517e-10	C_8
AGAP000411		Unknown	8.92184e-19	1.53553	0.792	0.088	1.17153e-14	C_8
AGAP007110		protein vein [Source:VB Community Annotation]	8.86317e-16	1.53313	0.625	0.061	1.16382e-11	C_8
AGAP009005		solute carrier family 30 (zinc transporter)%2C member 2 [Source:VB Community Annotation]	4.27059e-17	1.53012	0.75	0.083	5.60771e-13	C_8
AGAP009284		Unknown	3.70515e-13	1.52931	0.583	0.066	4.86523e-09	C_8
AGAP002444	GPROP12	pteropsin [Source:VB Community Annotation]	1.06554e-12	1.52905	0.542	0.057	1.39916e-08	C_8
AGAP012252		classical protein kinase C [Source:VB Community Annotation]	2.53655e-13	1.52898	0.542	0.057	3.33075e-09	C_8
AGAP009000		chymotrypsin like protease [Source:VB Community Annotation]	2.00815e-14	1.52742	0.625	0.07	2.6369e-10	C_8
AGAP002802		neural cell adhesion molecule [Source:VB Community Annotation]	2.55365e-14	1.5254	0.625	0.07	3.35319e-10	C_8
AGAP008986		Unknown	3.33571e-14	1.52273	0.542	0.048	4.38012e-10	C_8
AGAP007821		Unknown	1.04001e-15	1.52008	0.708	0.083	1.36564e-11	C_8
AGAP008255	NOS	nitric-oxide synthase%2C invertebrate [Source:VB Community Annotation]	5.10079e-14	1.51901	0.708	0.105	6.69785e-10	C_8
AGAP009252		Unknown	2.27113e-14	1.51672	0.625	0.075	2.98222e-10	C_8
AGAP001369		Unknown	3.67824e-11	1.51665	0.583	0.096	4.8299e-07	C_8
AGAP010048		Unknown	1.92791e-10	1.51614	0.542	0.083	2.53153e-06	C_8
AGAP000389		Unknown	3.38464e-15	1.51379	0.667	0.079	4.44437e-11	C_8
AGAP002079		Unknown	1.40785e-12	1.51303	0.625	0.088	1.84865e-08	C_8
AGAP001117	Gr37	gustatory receptor 37 [Source:VB Community Annotation]	4.08464e-14	1.51179	0.667	0.083	5.36354e-10	C_8
AGAP010545		Trypsin-like serine protease	8.15455e-13	1.51064	0.583	0.07	1.07077e-08	C_8
AGAP008812		Unknown	1.3208e-13	1.51027	0.583	0.066	1.73434e-09	C_8
AGAP008689		dynein intermediate chain 1%2C axonemal [Source:VB Community Annotation]	2.03862e-14	1.51021	0.542	0.048	2.67691e-10	C_8
AGAP010617		Unknown	2.00425e-15	1.49974	0.542	0.044	2.63179e-11	C_8
AGAP005855		Unknown	8.74753e-18	1.49829	0.583	0.039	1.14864e-13	C_8
AGAP005735		Zinc finger, CCCH-type	6.10762e-10	1.49729	0.542	0.092	8.01992e-06	C_8
AGAP028649		Unknown	4.76568e-13	1.49563	0.583	0.07	6.25782e-09	C_8
AGAP011569		secretory phospholipase A2 [Source:VB Community Annotation]	1.77785e-13	1.49145	0.625	0.075	2.33449e-09	C_8
AGAP001124		Aminomethyltransferase [Source:UniProtKB/TrEMBL%3BAcc:Q7PWZ1]	1.39792e-14	1.48763	0.625	0.07	1.83561e-10	C_8
AGAP003921		voltage-gated ion channel [Source:VB Community Annotation]	5.58843e-15	1.48689	0.667	0.083	7.33816e-11	C_8
AGAP001158		Unknown	2.08594e-10	1.48681	0.542	0.079	2.73905e-06	C_8
AGAP002828		Unknown	9.23657e-11	1.48677	0.542	0.083	1.21285e-06	C_8
AGAP006045		protein yorkie [Source:VB Community Annotation]	2.07406e-12	1.48453	0.625	0.088	2.72345e-08	C_8
AGAP011609		DBH-like monooxygenase protein 1 [Source:VB Community Annotation]	5.05868e-12	1.48364	0.583	0.079	6.64256e-08	C_8
AGAP009560		Unknown	2.99899e-13	1.48314	0.667	0.096	3.93797e-09	C_8
AGAP010230		MAGUK p55 subfamily member 3 [Source:VB Community Annotation]	2.36013e-10	1.47721	0.583	0.096	3.09909e-06	C_8
AGAP012179		Unknown	3.46842e-16	1.47568	0.667	0.066	4.55438e-12	C_8
AGAP008658		Unknown	9.26057e-14	1.46973	0.625	0.075	1.21601e-09	C_8
AGAP004186		Unknown	4.67354e-16	1.46939	0.792	0.105	6.13683e-12	C_8
AGAP006374		Unknown	3.70709e-12	1.46752	0.625	0.092	4.86778e-08	C_8
AGAP001678		Unknown	1.87674e-16	1.46668	0.917	0.162	2.46435e-12	C_8
AGAP008082		Unknown	9.39908e-12	1.46633	0.542	0.066	1.23419e-07	C_8
AGAP004902		Unknown	2.7239e-18	1.46416	0.875	0.118	3.57676e-14	C_8
AGAP007073		Unknown	2.43025e-10	1.46402	0.542	0.083	3.19116e-06	C_8
AGAP010535		3-demethylubiquinone-9 3-methyltransferase 2 [Source:VB Community Annotation]	9.45635e-11	1.46173	0.542	0.075	1.24171e-06	C_8
AGAP001175	GPRCAL2	putative calcitonin receptor 2 [Source:VB Community Annotation]	6.28917e-14	1.45901	0.667	0.088	8.25832e-10	C_8
AGAP010360		Unknown	9.09813e-12	1.45629	0.667	0.105	1.19468e-07	C_8
AGAP012434		voltage-dependent calcium channel alpha 1%2C invertebrate [Source:VB Community Annotation]	3.54708e-16	1.45507	0.75	0.096	4.65768e-12	C_8
AGAP010781		Unknown	2.76604e-14	1.45282	0.625	0.07	3.63208e-10	C_8
AGAP009253		defective proboscis extension response [Source:VB Community Annotation]	1.48957e-15	1.45076	0.875	0.14	1.95595e-11	C_8
AGAP011318		Synaptogyrin [Source:VB Community Annotation]	2.55489e-12	1.45034	0.542	0.061	3.35483e-08	C_8
AGAP007135		tripartite motif-containing protein 71 [Source:VB Community Annotation]	3.21516e-15	1.44706	0.625	0.061	4.22183e-11	C_8
AGAP003400		Unknown	1.61404e-11	1.44513	0.583	0.083	2.11939e-07	C_8
AGAP008139		Unknown	8.51662e-13	1.43502	0.667	0.096	1.11832e-08	C_8
AGAP007006		filamin [Source:VB Community Annotation]	4.16665e-13	1.43411	0.542	0.057	5.47123e-09	C_8
AGAP002104		Unknown	2.94405e-15	1.42984	0.875	0.149	3.86583e-11	C_8
AGAP006404		Unknown	3.80092e-10	1.42967	0.542	0.079	4.99098e-06	C_8
AGAP004728		Unknown	7.33605e-16	1.42877	0.792	0.101	9.63296e-12	C_8
AGAP009002	HR3	hormone receptor 3 [Source:VB Community Annotation]	2.99578e-14	1.4258	0.625	0.07	3.93375e-10	C_8
AGAP009917		Unknown	2.04941e-13	1.42565	0.792	0.149	2.69108e-09	C_8
AGAP010817		Unknown	3.06962e-15	1.4225	0.542	0.044	4.03072e-11	C_8
AGAP002274		Unknown	7.49363e-14	1.41994	0.708	0.105	9.83989e-10	C_8
AGAP000113		Unknown	2.66162e-09	1.41783	0.542	0.101	3.49497e-05	C_8
AGAP004701		Unknown	4.15501e-15	1.41705	0.792	0.11	5.45594e-11	C_8
AGAP007914		Transport and Golgi organization 6 [Source:VB Community Annotation]	1.09858e-12	1.41493	0.625	0.088	1.44255e-08	C_8
AGAP009933		dachs [Source:VB Community Annotation]	3.55678e-11	1.41424	0.583	0.088	4.6704e-07	C_8
AGAP000138	alpha4	nicotinic acetylcholine receptor subunit alpha 4 [Source:VB Community Annotation]	1.21852e-12	1.4122	0.708	0.105	1.60004e-08	C_8
AGAP005869		ubiquitin-conjugating enzyme E2 N	8.71442e-14	1.40987	0.75	0.118	1.14429e-09	C_8
AGAP010245		Roundabout [Source:VB Community Annotation]	1.10224e-14	1.40919	0.75	0.105	1.44735e-10	C_8
AGAP010869		fibrinogen [Source:VB Community Annotation]	2.21459e-14	1.407	0.625	0.066	2.90797e-10	C_8
AGAP004950		CUG-BP- and ETR3-like factor [Source:VB Community Annotation]	1.09424e-15	1.40462	0.875	0.127	1.43684e-11	C_8
AGAP007923		Unknown	2.61997e-15	1.40404	0.75	0.096	3.44028e-11	C_8
AGAP010370		solute carrier family 17 (anion/sugar transporter)%2C member 5 [Source:VB Community Annotation]	4.2059e-11	1.40235	0.583	0.083	5.52277e-07	C_8
AGAP011103		Pickpocket [Source:VB Community Annotation]	7.3933e-13	1.39981	0.542	0.057	9.70814e-09	C_8
AGAP005795		sodium-coupled monocarboxylate transporter 1 [Source:VB Community Annotation]	5.41145e-11	1.39964	0.542	0.075	7.10578e-07	C_8
AGAP003849		Unknown	3.2314e-12	1.39913	0.625	0.092	4.24315e-08	C_8
AGAP005588		Unknown	5.15336e-16	1.39862	0.75	0.088	6.76688e-12	C_8
AGAP001123	Gr36	gustatory receptor 36 [Source:VB Community Annotation]	8.40122e-13	1.39488	0.625	0.083	1.10316e-08	C_8
AGAP012757		aminopeptidase N1 [Source:VB Community Annotation]	2.90819e-14	1.39464	0.667	0.083	3.81875e-10	C_8
AGAP002153		Unknown	3.16532e-13	1.39352	0.583	0.066	4.15638e-09	C_8
AGAP005725	SCRB3	Class B Scavenger Receptor (CD36 domain). [Source:VB Community Annotation]	7.19724e-15	1.3918	0.792	0.114	9.45069e-11	C_8
AGAP007550		carbonic anhydrase [Source:VB Community Annotation]	5.72484e-14	1.39111	0.583	0.061	7.51729e-10	C_8
AGAP000844		Progestin and adipoQ receptor family member 4 [Source:VB Community Annotation]	1.08343e-12	1.39083	0.667	0.096	1.42265e-08	C_8
AGAP028431		Unknown	1.76846e-12	1.39063	0.667	0.101	2.32217e-08	C_8
AGAP005205	PGRPLA	peptidoglycan recognition protein (long) [Source:VB Community Annotation]	3.8231e-13	1.39013	0.708	0.114	5.02011e-09	C_8
AGAP005984		fatty acyl-CoA reductase 2 [Source:VB Community Annotation]	5.1172e-13	1.38923	0.542	0.057	6.7194e-09	C_8
AGAP002792		Unknown	3.46211e-09	1.38779	0.542	0.096	4.54609e-05	C_8
AGAP009725		cadherin [Source:VB Community Annotation]	3.55348e-16	1.38529	0.875	0.132	4.66608e-12	C_8
AGAP010260		Unknown	6.06497e-11	1.38504	0.583	0.088	7.96392e-07	C_8
AGAP002009		dynein heavy chain%2C axonemal [Source:VB Community Annotation]	4.99796e-14	1.38461	0.75	0.114	6.56282e-10	C_8
AGAP005464	GPRDIH1	putative diuretic insect hormone receptor 1 [Source:VB Community Annotation]	1.49668e-15	1.38057	0.75	0.096	1.96529e-11	C_8
AGAP012963		Unknown	2.62175e-12	1.37953	0.708	0.114	3.44262e-08	C_8
AGAP028200	CPLCP9	cuticular protein (putative) CPLCP9 [Source:VB Community Annotation]	6.21673e-14	1.37794	0.583	0.061	8.16319e-10	C_8
AGAP007031		Scabrous protein [Source:VB Community Annotation]	1.05823e-14	1.37592	0.667	0.079	1.38957e-10	C_8
AGAP007092	DSCAM	Down syndrome cell adhesion molecule [Source:VB Community Annotation]	3.93503e-14	1.37488	0.75	0.114	5.16709e-10	C_8
AGAP000801	GLURIIb	ionotropic receptor GLURIIb [Source:VB Community Annotation]	3.53909e-17	1.37477	0.792	0.096	4.64718e-13	C_8
AGAP001168		Unknown	5.77094e-16	1.37454	0.792	0.114	7.57782e-12	C_8
AGAP012326	TOLL7	TOLL-like receptor 7 [Source:VB Community Annotation]	1.21296e-13	1.37341	0.542	0.053	1.59274e-09	C_8
AGAP011737		A disintegrin and metalloproteinase with thrombospondin motifs 16 [Source:VB Community Annotation]	6.10096e-13	1.37141	0.75	0.114	8.01117e-09	C_8
AGAP009242		defective proboscis extension response [Source:VB Community Annotation]	4.43889e-14	1.37087	0.708	0.092	5.82871e-10	C_8
AGAP007365		Unknown	2.72086e-11	1.3688	0.667	0.114	3.57276e-07	C_8
AGAP001769		beat protein [Source:VB Community Annotation]	6.19057e-14	1.36858	0.667	0.079	8.12884e-10	C_8
AGAP010000		Unknown	2.6368e-10	1.36752	0.542	0.079	3.46238e-06	C_8
AGAP011322		fibulin 2 [Source:VB Community Annotation]	4.74741e-14	1.36521	0.667	0.083	6.23383e-10	C_8
AGAP002711		stardust%2C isoform B [Source:VB Community Annotation]	1.17234e-10	1.36491	0.625	0.11	1.53941e-06	C_8
AGAP010057		nicotinic acetylcholine receptor%2C beta-2 subunit [Source:VB Community Annotation]	1.2889e-11	1.36422	0.625	0.088	1.69245e-07	C_8
AGAP007725		Unknown	2.86331e-11	1.36384	0.708	0.132	3.75981e-07	C_8
AGAP002552		glucose dehydrogenase (acceptor) [Source:VB Community Annotation]	4.39932e-14	1.36184	0.667	0.079	5.77675e-10	C_8
AGAP013533		Unknown	4.40647e-09	1.36117	0.583	0.11	5.78613e-05	C_8
AGAP006215	GPRMTH1	methuselah receptor 1 [Source:VB Community Annotation]	1.10662e-15	1.36099	0.625	0.066	1.45311e-11	C_8
AGAP000938		Unknown	2.46493e-10	1.36029	0.583	0.092	3.2367e-06	C_8
AGAP003090		ubiquitin-conjugating enzyme E2 O [Source:VB Community Annotation]	3.12246e-12	1.35604	0.667	0.101	4.1001e-08	C_8
AGAP028192		Unknown	2.07598e-14	1.35343	0.875	0.162	2.72597e-10	C_8
AGAP004209		diacylglycerol kinase (ATP dependent) [Source:VB Community Annotation]	3.0843e-14	1.35225	0.708	0.092	4.05e-10	C_8
AGAP005716	SCRB16	Class B Scavenger Receptor (CD36 domain) [Source:VB Community Annotation]	8.63391e-15	1.35185	0.625	0.066	1.13372e-10	C_8
AGAP011279		solute carrier family 6 (neurotransmitter transporter%2C amino acid/orphan) [Source:VB Community Annotation]	3.09799e-11	1.35153	0.583	0.083	4.06797e-07	C_8
AGAP008077		Unknown	2.95222e-16	1.35115	0.625	0.057	3.87657e-12	C_8
AGAP006027	GLURI	glutamate receptor%2C ionotropic %2C AMPA [Source:VB Community Annotation]	3.55828e-15	1.35113	0.708	0.088	4.67238e-11	C_8
AGAP011331		Unknown	5.8725e-17	1.3509	0.875	0.123	7.71118e-13	C_8
AGAP028497		Unknown	6.95904e-10	1.35009	0.583	0.101	9.13792e-06	C_8
AGAP003764		juvenile hormone-inducible protein [Source:VB Community Annotation]	3.93294e-11	1.34955	0.583	0.088	5.16435e-07	C_8
AGAP011812		Elongation of very long chain fatty acids protein (Fragment) [Source:UniProtKB/TrEMBL%3BAcc:Q7PZA2]	4.46755e-14	1.34475	0.583	0.061	5.86635e-10	C_8
AGAP010750		ryanodine receptor 2 [Source:VB Community Annotation]	3.76994e-17	1.34454	0.958	0.175	4.95031e-13	C_8
AGAP007046		potassium voltage-gated channel Shal-related subfamily D%2C invertebrate [Source:VB Community Annotation]	1.24841e-12	1.34302	0.625	0.083	1.63929e-08	C_8
AGAP003877		Unknown	6.37964e-12	1.343	0.583	0.075	8.37711e-08	C_8
AGAP013202		Unknown	1.20211e-11	1.34268	0.708	0.123	1.57848e-07	C_8
AGAP011481	GPR5HT1B	putative serotonin 5HT-1b receptor [Source:VB Community Annotation]	2.24087e-10	1.34246	0.583	0.092	2.94248e-06	C_8
AGAP004754	CASPL2	long caspase (CASPL2) [Source:VB Community Annotation]	5.12993e-12	1.34185	0.667	0.101	6.7361e-08	C_8
AGAP009257		Protein ARRD-6%2C isoform a [Source:VB Community Annotation]	1.40951e-11	1.34093	0.667	0.101	1.85082e-07	C_8
AGAP010050		Unknown	5.68148e-10	1.34067	0.542	0.083	7.46035e-06	C_8
AGAP013536		Unknown	1.02627e-11	1.33909	0.625	0.092	1.34759e-07	C_8
AGAP002824	GPRTAK1	putative tachykinin receptor 1 [Source:VB Community Annotation]	2.08272e-11	1.33857	0.667	0.11	2.73482e-07	C_8
AGAP009448		Unknown	1.19988e-15	1.33629	0.625	0.061	1.57556e-11	C_8
AGAP005257		Unknown	1.57236e-12	1.33537	0.75	0.136	2.06466e-08	C_8
AGAP003449		rootletin [Source:VB Community Annotation]	6.44744e-11	1.33287	0.542	0.075	8.46613e-07	C_8
AGAP012409	GNBPA2	3-glucan binding protein [Source:VB Community Annotation]	9.08739e-14	1.33193	0.667	0.088	1.19327e-09	C_8
AGAP007498	IR75k	ionotropic receptor IR75k [Source:VB Community Annotation]	3.45137e-10	1.3312	0.583	0.101	4.532e-06	C_8
AGAP005794		Unknown	1.26602e-13	1.32988	0.542	0.053	1.66241e-09	C_8
AGAP002210	CYP325B1	cytochrome P450 [Source:VB Community Annotation]	8.35939e-10	1.32924	0.542	0.083	1.09767e-05	C_8
AGAP028660		Unknown	1.90947e-13	1.32887	0.625	0.079	2.50733e-09	C_8
AGAP012429	NMDAR2	ionotropic receptor NMDAR2 [Source:VB Community Annotation]	8.35939e-10	1.32872	0.542	0.083	1.09767e-05	C_8
AGAP008320		Sidestep protein [Source:VB Community Annotation]	5.23425e-14	1.32858	0.708	0.101	6.8731e-10	C_8
AGAP011357		All-trans/9-cis/11-cis [Source:VB Community Annotation]	8.59264e-14	1.32709	0.583	0.057	1.1283e-09	C_8
AGAP011811		Unknown	8.35349e-13	1.32686	0.542	0.057	1.0969e-08	C_8
AGAP003128		signal transduction	2.17184e-14	1.32446	0.708	0.088	2.85184e-10	C_8
AGAP011384		Unknown	6.62585e-10	1.32379	0.542	0.088	8.70041e-06	C_8
AGAP006452		Lethal (2) 01289, isoform B [Source:VB External Description;Acc:AGAP006452]	1.72117e-15	1.32363	0.917	0.162	2.26007e-11	C_8
AGAP028575		Unknown	1.01874e-15	1.3223	0.75	0.092	1.33771e-11	C_8
AGAP008028		voltage-dependent calcium channel beta%2C invertebrate [Source:VB Community Annotation]	4.48431e-17	1.3199	0.958	0.145	5.88835e-13	C_8
AGAP010049		Unknown	1.64524e-11	1.31986	0.542	0.066	2.16037e-07	C_8
AGAP007836		sodium-coupled monocarboxylate transporter 2 [Source:VB Community Annotation]	3.63584e-14	1.31972	0.667	0.079	4.77422e-10	C_8
AGAP007788		E3 ubiquitin-protein ligase RNF31 [Source:VB Community Annotation]	1.62825e-15	1.31577	0.958	0.175	2.13806e-11	C_8
AGAP007099		Unknown	3.78827e-14	1.31451	0.667	0.083	4.97438e-10	C_8
AGAP008904		glutamate decarboxylase [Source:VB Community Annotation]	2.23027e-08	1.31384	0.542	0.105	0.000292857	C_8
AGAP005564		transcription factor CP2 and related proteins [Source:VB Community Annotation]	5.15881e-14	1.31315	0.833	0.136	6.77404e-10	C_8
AGAP009061		netrin receptor unc-5 [Source:VB Community Annotation]	5.05003e-13	1.31307	0.667	0.092	6.63119e-09	C_8
AGAP010456		Unknown	3.701e-11	1.31212	0.667	0.114	4.85978e-07	C_8
AGAP009039		glucose-6-phosphate 1-epimerase [Source:VB Community Annotation]	1.54309e-09	1.31203	0.625	0.123	2.02624e-05	C_8
AGAP011578		Unknown	1.64845e-09	1.30818	0.542	0.088	2.16458e-05	C_8
AGAP010222		lachesin [Source:VB Community Annotation]	8.12225e-14	1.30652	0.75	0.105	1.06653e-09	C_8
AGAP009953		guanine nucleotide-binding protein G(I)/G(S)/G(O) subunit gamma-13 [Source:VB Community Annotation]	1.68089e-09	1.3058	0.542	0.083	2.20717e-05	C_8
AGAP011407		Unknown	8.26721e-11	1.30539	0.583	0.092	1.08557e-06	C_8
AGAP010473		Pleckstrin-like proteiny domain-containing family G member 5 [Source:VB Community Annotation]	8.74591e-17	1.30464	0.875	0.132	1.14842e-12	C_8
AGAP002273		Unknown	2.96526e-15	1.30125	0.667	0.075	3.89368e-11	C_8
AGAP003933		Unknown	1.43237e-10	1.29934	0.583	0.092	1.88084e-06	C_8
AGAP009115		phosphatidylinositol phospholipase C%2C beta [Source:VB Community Annotation]	9.05994e-10	1.29785	0.625	0.123	1.18966e-05	C_8
AGAP009795		Unknown	1.94073e-11	1.29443	0.625	0.101	2.54837e-07	C_8
AGAP004623		anaphase-promoting complex subunit 6 [Source:VB Community Annotation]	6.16527e-10	1.29379	0.583	0.101	8.09561e-06	C_8
AGAP002041		Unknown	3.55926e-11	1.29375	0.625	0.096	4.67367e-07	C_8
AGAP000080		Unknown	1.97255e-13	1.29245	0.708	0.105	2.59015e-09	C_8
AGAP010474		anoctamin 5 [Source:VB Community Annotation]	1.35193e-13	1.29209	0.708	0.101	1.77522e-09	C_8
AGAP004033		Unknown	1.46784e-17	1.29182	0.875	0.114	1.92742e-13	C_8
AGAP006514		Unknown	2.07936e-11	1.29044	0.583	0.079	2.73041e-07	C_8
AGAP006028	Rdl	GABA-gated chloride channel subunit [Source:VB Community Annotation]	9.70396e-12	1.28966	0.708	0.123	1.27423e-07	C_8
AGAP005471		Pseudokinase domain; pleckstrin homology domain; contains Immunoglobulin I-set domain	8.75927e-13	1.28964	0.667	0.105	1.15018e-08	C_8
AGAP001194		Unknown	2.17761e-13	1.28961	0.833	0.158	2.85942e-09	C_8
AGAP001824		Unknown	1.52304e-16	1.28932	0.917	0.136	1.9999e-12	C_8
AGAP002591		Unknown	1.50116e-14	1.28909	0.667	0.079	1.97117e-10	C_8
AGAP000477		serine/threonine kinase 32 [Source:VB Community Annotation]	1.34769e-09	1.28831	0.542	0.083	1.76965e-05	C_8
AGAP028071		Unknown	6.4118e-17	1.2863	0.75	0.083	8.41934e-13	C_8
AGAP012067		Unknown	1.33496e-10	1.28597	0.583	0.088	1.75294e-06	C_8
AGAP027980	ABCC10	ATP-binding cassette transporter (ABC transporter) family C member 10 [Source:VB Community Annotation]	2.06536e-13	1.28332	0.875	0.171	2.71202e-09	C_8
AGAP002793		slit homolog 1 protein precursor [Source:VB Community Annotation]	3.61486e-10	1.28173	0.708	0.154	4.74667e-06	C_8
AGAP004201		a disintegrin and metalloproteinase with thrombospondin motifs 9 [Source:VB Community Annotation]	1.52419e-14	1.28132	0.875	0.149	2.00142e-10	C_8
AGAP012163		Guanylate cyclase (Fragment) [Source:UniProtKB/TrEMBL%3BAcc:Q7PZZ3]	1.57392e-11	1.28024	0.625	0.096	2.06672e-07	C_8
AGAP004923	IR64a	ionotropic receptor IR64a [Source:VB Community Annotation]	4.06314e-11	1.27958	0.542	0.07	5.33531e-07	C_8
AGAP009693		RNA pseudouridylate synthase domain-containing protein 2 [Source:VB Community Annotation]	2.53838e-13	1.27876	0.833	0.14	3.33314e-09	C_8
AGAP006908		von Willebrand factor, type C	2.02646e-10	1.27755	0.625	0.105	2.66095e-06	C_8
AGAP010272	IR25a	ionotropic receptor IR25a [Source:VB Community Annotation]	1.23103e-09	1.27717	0.583	0.101	1.61646e-05	C_8
AGAP007657		syndecan 2 [Source:VB Community Annotation]	2.95747e-07	1.27675	0.583	0.158	0.00388346	C_8
AGAP008842	AQP4	Aquaporin AQPAn.G [Source:UniProtKB/Swiss-Prot%3BAcc:Q7PWV1]	2.91424e-10	1.27606	0.542	0.079	3.82668e-06	C_8
AGAP007072		Unknown	8.03966e-14	1.27499	0.75	0.114	1.05569e-09	C_8
AGAP011368	OBP57	odorant-binding protein 57 [Source:VB Community Annotation]	1.43568e-09	1.27402	0.542	0.083	1.8852e-05	C_8
AGAP004733		Unknown	1.17673e-11	1.26979	0.542	0.066	1.54517e-07	C_8
AGAP005311		Unknown	1.64116e-10	1.26857	0.542	0.075	2.15501e-06	C_8
AGAP009726		Unknown	4.85714e-10	1.26651	0.625	0.114	6.37791e-06	C_8
AGAP004166		Unknown	1.91087e-10	1.26638	0.583	0.092	2.50916e-06	C_8
AGAP005378		Unknown	2.40324e-14	1.26637	0.708	0.096	3.15569e-10	C_8
AGAP005235		Unknown	5.40789e-11	1.26553	0.542	0.07	7.1011e-07	C_8
AGAP003945		olypyrimidine tract-binding protein 2 [Source:VB Community Annotation]	6.0357e-16	1.26521	0.917	0.14	7.92548e-12	C_8
AGAP002133		tRNA modification GTPase [Source:VB Community Annotation]	7.8519e-12	1.26366	0.542	0.061	1.03103e-07	C_8
AGAP005806		Unknown	9.92807e-16	1.26232	0.917	0.154	1.30366e-11	C_8
AGAP005507		synaptic vesicle-associated integral membrane protein [Source:VB Community Annotation]	3.64734e-13	1.26153	0.833	0.149	4.78933e-09	C_8
AGAP007466		Unknown	8.69998e-13	1.25942	0.542	0.057	1.14239e-08	C_8
AGAP002577		voltage-dependent p/q type calcium channel [Source:VB Community Annotation]	1.20932e-11	1.2576	0.708	0.132	1.58796e-07	C_8
AGAP005207		SCY1-like protein 2 [Source:VB Community Annotation]	1.88038e-14	1.25749	0.833	0.132	2.46912e-10	C_8
AGAP011427		Unknown	7.01723e-09	1.25713	0.542	0.096	9.21433e-05	C_8
AGAP007071		Unknown	5.32759e-11	1.25645	0.583	0.083	6.99566e-07	C_8
AGAP008559		Unknown	8.10841e-14	1.25603	0.792	0.132	1.06472e-09	C_8
AGAP001122	Gr41	gustatory receptor 41 [Source:VB Community Annotation]	3.09799e-11	1.25414	0.583	0.083	4.06797e-07	C_8
AGAP009063		Unknown	7.08872e-10	1.25287	0.625	0.114	9.3082e-06	C_8
AGAP008317		tyrosine-protein kinase Tec [Source:VB Community Annotation]	7.87815e-15	1.25018	0.917	0.162	1.03448e-10	C_8
AGAP000974		Unknown	1.19235e-11	1.24977	0.75	0.145	1.56568e-07	C_8
AGAP010350		Unknown	2.02287e-12	1.24664	0.583	0.07	2.65624e-08	C_8
AGAP001434		glutamate receptor%2C anionic [Source:VB Community Annotation]	2.53886e-09	1.24472	0.625	0.123	3.33378e-05	C_8
AGAP004660		Antennapedia homeotic protein [Source:VB Community Annotation]	2.05924e-12	1.24464	0.75	0.127	2.70399e-08	C_8
AGAP004230		Sidestep protein [Source:VB Community Annotation]	2.13948e-11	1.24386	0.708	0.123	2.80935e-07	C_8
AGAP009248		defective proboscis extension response [Source:VB Community Annotation]	3.95708e-10	1.2425	0.583	0.092	5.19604e-06	C_8
AGAP003305		Unknown	2.76252e-14	1.24189	0.792	0.114	3.62746e-10	C_8
AGAP010466		Unknown	2.06767e-11	1.23944	0.625	0.092	2.71506e-07	C_8
AGAP005943		Unknown	5.92056e-10	1.23918	0.625	0.123	7.77428e-06	C_8
AGAP010410		Unknown	7.49605e-12	1.23917	0.667	0.105	9.84306e-08	C_8
AGAP007992		Vesicular glutamate transporter 2 [Source:VB Community Annotation]	8.35349e-13	1.23853	0.542	0.057	1.0969e-08	C_8
AGAP010414	CYP4C28	cytochrome P450 [Source:VB Community Annotation]	2.35513e-13	1.23848	0.708	0.101	3.09252e-09	C_8
AGAP002159		Unknown	1.09437e-14	1.23659	0.75	0.114	1.43702e-10	C_8
AGAP007792		Unknown	2.51528e-13	1.23623	0.792	0.14	3.30281e-09	C_8
AGAP001351		Unknown	1.16691e-08	1.23506	0.625	0.14	0.000153227	C_8
AGAP012403		Unknown	1.70145e-09	1.2337	0.542	0.092	2.23417e-05	C_8
AGAP008140		Unknown	2.10268e-10	1.23355	0.583	0.092	2.76102e-06	C_8
AGAP001806		Unknown	1.85501e-11	1.23101	0.625	0.096	2.43581e-07	C_8
AGAP028444		Unknown	9.66834e-09	1.23	0.542	0.092	0.000126955	C_8
AGAP010332		Unknown	1.61571e-09	1.22975	0.667	0.145	2.12159e-05	C_8
AGAP028448		Unknown	7.36029e-12	1.22974	0.667	0.101	9.6648e-08	C_8
AGAP003513		Unknown	2.13604e-13	1.22919	0.75	0.118	2.80483e-09	C_8
AGAP004795		RNA polymerase II elongation factor ELL [Source:VB Community Annotation]	2.80863e-12	1.22705	0.75	0.136	3.68801e-08	C_8
AGAP005627		creatine kinase [Source:VB Community Annotation]	1.45863e-12	1.22259	0.75	0.123	1.91533e-08	C_8
AGAP005599		PH-sensitive chloride channel [Source:VB Community Annotation]	6.95995e-12	1.22255	0.792	0.158	9.13911e-08	C_8
AGAP007712		A-kinase anchor protein 13 [Source:VB Community Annotation]	2.20091e-11	1.2214	0.875	0.211	2.89002e-07	C_8
AGAP000715		carbonic anhydrase-related protein 10 [Source:VB Community Annotation]	1.56758e-09	1.21901	0.625	0.118	2.05839e-05	C_8
AGAP000519		diacylglycerol kinase (ATP dependent) [Source:VB Community Annotation]	1.40404e-10	1.21817	0.625	0.105	1.84364e-06	C_8
AGAP002573		GTPase-activating Rap/Ran-GAP domain-like protein 3 [Source:VB Community Annotation]	1.86511e-09	1.21796	0.542	0.092	2.44908e-05	C_8
AGAP009596		Sidestep protein [Source:VB Community Annotation]	1.52294e-11	1.21394	0.625	0.096	1.99977e-07	C_8
AGAP028427		Unknown	7.96739e-11	1.21335	0.583	0.083	1.0462e-06	C_8
AGAP004662		homeobox protein abdominal-A homolog [Source:VB Community Annotation]	4.38205e-12	1.21231	0.583	0.079	5.75407e-08	C_8
AGAP008700		inositol-pentakisphosphate 2-kinase [Source:VB Community Annotation]	4.52968e-10	1.21226	0.625	0.11	5.94792e-06	C_8
AGAP004846	SCRB9	Class B Scavenger Receptor (CD36 domain). [Source:VB Community Annotation]	1.80047e-12	1.20814	0.875	0.184	2.3642e-08	C_8
AGAP012161		Guanylate cyclase (Fragment) [Source:UniProtKB/TrEMBL%3BAcc:Q7PZZ2]	6.3422e-11	1.20701	0.625	0.101	8.32795e-07	C_8
AGAP009777		mothers against decapentaplegic homolog 2/3 [Source:VB Community Annotation]	1.849e-09	1.20561	0.708	0.162	2.42792e-05	C_8
AGAP009669		Unknown	3.04247e-14	1.20542	0.792	0.11	3.99507e-10	C_8
AGAP002784	CLIPD8	CLIP-domain serine protease [Source:VB Community Annotation]	3.02651e-10	1.203	0.542	0.075	3.97412e-06	C_8
AGAP003080		oo18 RNA-binding protein [Source:VB Community Annotation]	4.66468e-12	1.20135	0.667	0.11	6.1252e-08	C_8
AGAP008400		Unknown	1.1121e-08	1.19974	0.542	0.105	0.00014603	C_8
AGAP008468		fatty acid synthase%2C animal type [Source:VB Community Annotation]	1.62337e-15	1.19954	0.833	0.132	2.13164e-11	C_8
AGAP000663		solute carrier family 41 [Source:VB Community Annotation]	6.14524e-10	1.19943	0.75	0.18	8.06932e-06	C_8
AGAP007777		Putative leucine-rich repeat-containing protein	2.01706e-10	1.19909	0.542	0.079	2.6486e-06	C_8
AGAP028405		Unknown	2.7453e-11	1.19737	0.583	0.079	3.60485e-07	C_8
AGAP010359		Pairberry [Source:VB Community Annotation]	3.89602e-11	1.19569	0.708	0.123	5.11587e-07	C_8
AGAP001238		Ras-specific guanine nucleotide-releasing factor 2 [Source:VB Community Annotation]	1.49684e-12	1.19487	0.792	0.14	1.96551e-08	C_8
AGAP013721		Unknown	4.60182e-12	1.19348	0.583	0.075	6.04266e-08	C_8
AGAP010209		insulin gene enhancer protein ISL [Source:VB Community Annotation]	1.34605e-09	1.19256	0.583	0.101	1.7675e-05	C_8
AGAP001265		solute carrier family 7 (cationic amino acid transporter)%2C member 14 [Source:VB Community Annotation]	4.51665e-10	1.19068	0.542	0.088	5.93081e-06	C_8
AGAP008254		Unknown	7.43825e-09	1.19033	0.542	0.096	9.76716e-05	C_8
AGAP008364	TEP15	thioester-containing protein 15 [Source:VB Community Annotation]	1.16933e-12	1.19019	0.708	0.114	1.53545e-08	C_8
AGAP028612		Unknown	6.70812e-12	1.18899	0.75	0.14	8.80843e-08	C_8
AGAP007709		potassium voltage-gated channel Eag-related subfamily H member 6 [Source:VB Community Annotation]	1.45318e-12	1.18848	0.75	0.132	1.90818e-08	C_8
AGAP008778		lachesin [Source:VB Community Annotation]	4.45649e-09	1.18811	0.583	0.105	5.85181e-05	C_8
AGAP007340	SLC2A1	facilitated glucose transporter (solute carrier family 2) [Source:VB Community Annotation]	6.67949e-14	1.18751	1	0.206	8.77083e-10	C_8
AGAP011094		Unknown	1.27917e-09	1.18734	0.625	0.132	1.67967e-05	C_8
AGAP007676		Unknown	1.528e-11	1.18686	0.542	0.07	2.00642e-07	C_8
AGAP001916		Unknown	1.34175e-11	1.18673	0.625	0.092	1.76186e-07	C_8
AGAP001925		Unknown	1.28804e-08	1.18555	0.583	0.118	0.000169133	C_8
AGAP003965		Unknown	1.2921e-11	1.1842	0.75	0.132	1.69666e-07	C_8
AGAP006701		Zinc finger, C2H2	7.52884e-09	1.18345	0.583	0.114	9.88612e-05	C_8
AGAP003283		atrial natriuretic peptide receptor A [Source:VB Community Annotation]	9.46423e-11	1.18296	0.625	0.11	1.24275e-06	C_8
AGAP010969		Roundabout 1 [Source:VB Community Annotation]	1.95605e-11	1.18295	0.667	0.11	2.5685e-07	C_8
AGAP005251		potassium voltage-gated channel [Source:VB Community Annotation]	1.93515e-12	1.18294	0.75	0.127	2.54105e-08	C_8
AGAP004543		Unknown	5.41043e-11	1.18274	0.625	0.096	7.10443e-07	C_8
AGAP009775		Unknown	1.30734e-08	1.18187	0.542	0.101	0.000171667	C_8
AGAP007928		Turtle protein%2C isoform [Source:VB Community Annotation]	7.25739e-12	1.18143	0.667	0.105	9.52968e-08	C_8
AGAP006546		Unknown	9.50007e-10	1.17977	0.542	0.083	1.24745e-05	C_8
AGAP005768	HEX1A	hexamerin [Source:VB Community Annotation]	1.20799e-12	1.17953	0.542	0.061	1.58621e-08	C_8
AGAP003005		serine/threonine-protein kinase SIK [Source:VB Community Annotation]	4.06084e-10	1.1787	0.542	0.079	5.33229e-06	C_8
AGAP004052		Unknown	3.07626e-10	1.17795	0.583	0.092	4.03943e-06	C_8
AGAP001205		chitin synthase [Source:VB Community Annotation]	1.34521e-12	1.17681	0.708	0.11	1.7664e-08	C_8
AGAP008742		Discoidin domain receptor family%2C member 1 [Source:VB Community Annotation]	3.87557e-13	1.17457	0.833	0.149	5.08902e-09	C_8
AGAP003772		NADPH oxidase 4 [Source:VB Community Annotation]	1.09445e-11	1.17339	0.583	0.075	1.43713e-07	C_8
AGAP004572		Unknown	1.34487e-08	1.17286	0.542	0.101	0.000176595	C_8
AGAP003140		neurofibromin 1 [Source:VB Community Annotation]	8.85684e-10	1.17081	0.583	0.101	1.16299e-05	C_8
AGAP007051		Piopio protein [Source:VB Community Annotation]	4.91313e-08	1.1686	0.542	0.105	0.000645143	C_8
AGAP009085		Cysteine-rich secretory protein 2 precursor [Source:VB Community Annotation]	4.68163e-10	1.16793	0.583	0.096	6.14745e-06	C_8
AGAP007732		solute carrier family 17%2C member 5 [Source:VB Community Annotation]	3.93757e-09	1.16726	0.708	0.154	5.17042e-05	C_8
AGAP010503		potassium intermediate/small conductance calcium-activated channel subfamily N [Source:VB Community Annotation]	1.2708e-14	1.16615	0.75	0.105	1.66869e-10	C_8
AGAP002342		Unknown	2.64337e-12	1.16104	0.667	0.101	3.47101e-08	C_8
AGAP012392		Unknown	1.43568e-09	1.16073	0.542	0.083	1.8852e-05	C_8
AGAP007761		Complement control protein [Source:VB Community Annotation]	4.40815e-12	1.15886	0.792	0.145	5.78835e-08	C_8
AGAP008611		Unknown	6.02274e-08	1.15849	0.583	0.132	0.000790846	C_8
AGAP007942		synaptotagmin-1 [Source:VB Community Annotation]	4.98563e-13	1.15839	0.833	0.145	6.54663e-09	C_8
AGAP010343		CTL-like protein 2 [Source:VB Community Annotation]	9.32234e-09	1.15798	0.583	0.118	0.000122412	C_8
AGAP005057		Unknown	1.83595e-09	1.15797	0.583	0.096	2.41079e-05	C_8
AGAP003692		Aminopeptidase [Source:UniProtKB/TrEMBL%3BAcc:Q5TT66]	2.23301e-12	1.15785	0.708	0.114	2.93216e-08	C_8
AGAP002145		inactivation no afterpotential D protein [Source:VB Community Annotation]	3.12578e-09	1.15738	0.542	0.092	4.10447e-05	C_8
AGAP010388		glucuronyl/N-acetylglucosaminyl transferase EXT1 [Source:VB Community Annotation]	1.60835e-07	1.15705	0.542	0.11	0.00211193	C_8
AGAP010281	GPRGBB1	putative GABA-B receptor 1 [Source:VB Community Annotation]	8.6053e-14	1.15671	0.833	0.136	1.12996e-09	C_8
AGAP003271		dynein%2C axonemal%2C heavy chain 5 [Source:VB Community Annotation]	8.85684e-10	1.15573	0.583	0.101	1.16299e-05	C_8
AGAP004066		neurexin [Source:VB Community Annotation]	1.12772e-11	1.15547	0.792	0.162	1.48081e-07	C_8
AGAP005324		ubiquitin-conjugating enzyme E2 W [Source:VB Community Annotation]	2.12423e-12	1.15463	0.708	0.11	2.78932e-08	C_8
AGAP010286		Unknown	1.09879e-13	1.15338	0.875	0.154	1.44282e-09	C_8
AGAP008437	ABCC9	ATP-binding cassette transporter (ABC transporter) family C member 8 [Source:VB Community Annotation]	7.277e-10	1.15316	0.792	0.197	9.55543e-06	C_8
AGAP008588	alpha5	nicotinic acetylcholine receptor subunit alpha 5 [Source:VB Community Annotation]	2.18749e-11	1.1529	0.75	0.136	2.8724e-07	C_8
AGAP007877		Unknown	1.98899e-09	1.15261	0.583	0.105	2.61175e-05	C_8
AGAP028172		Unknown	2.62896e-12	1.15086	0.583	0.07	3.45208e-08	C_8
AGAP003537		Cys2His2 zinc finger developmental/cell cycle regulator%2C other [Source:VB Community Annotation]	2.57809e-10	1.15	0.667	0.132	3.38529e-06	C_8
AGAP001110		Sorting nexin family member 27 isoform 1 [Source:VB Community Annotation]	4.21474e-08	1.14923	0.583	0.123	0.000553437	C_8
AGAP008680		ubiquitin-conjugating enzyme E2 R [Source:VB Community Annotation]	5.81679e-10	1.14526	0.75	0.184	7.63803e-06	C_8
AGAP005807		Unknown	7.52606e-15	1.14493	0.875	0.14	9.88247e-11	C_8
AGAP006415		Unknown	5.68871e-11	1.13914	0.708	0.127	7.46985e-07	C_8
AGAP004544		solute carrier family 35%2C member F3/4 [Source:VB Community Annotation]	9.61609e-18	1.13844	0.917	0.114	1.26269e-13	C_8
AGAP002888	GPRNNA3	putative GPCR class a orphan receptor 3 [Source:VB Community Annotation]	6.65206e-13	1.13791	0.75	0.127	8.73481e-09	C_8
AGAP028637		dual specificity phosphatase [Source:VB Community Annotation]	5.6117e-13	1.13576	0.667	0.092	7.36872e-09	C_8
AGAP003425		solute carrier family 7 (cationic amino acid transporter%2C y+ system) [Source:VB Community Annotation]	1.94507e-10	1.1347	0.583	0.083	2.55408e-06	C_8
AGAP008646		cGMP-specific 3'%2C5'-cyclic phosphodiesterase [Source:VB Community Annotation]	2.14872e-09	1.13449	0.75	0.171	2.82148e-05	C_8
AGAP000703		Unknown	1.06207e-10	1.13419	0.583	0.088	1.39461e-06	C_8
AGAP010694		glycine receptor alpha 1 subunit [Source:VB Community Annotation]	6.02606e-10	1.13172	0.542	0.079	7.91282e-06	C_8
AGAP006762		diacylglycerol kinase (ATP dependent) [Source:VB Community Annotation]	4.25974e-11	1.13023	0.708	0.123	5.59346e-07	C_8
AGAP012876		Unknown	9.80887e-08	1.12768	0.542	0.114	0.001288	C_8
AGAP006179		troponin C [Source:VB Community Annotation]	3.25265e-09	1.12578	0.583	0.105	4.27105e-05	C_8
AGAP002997		tumor necrosis factor alpha-induced protein 8-like protein [Source:VB Community Annotation]	4.97194e-09	1.12463	0.583	0.114	6.52865e-05	C_8
AGAP011386		solute carrier family 7 (cationic amino acid transporter%2C y+ system) [Source:VB Community Annotation]	6.67301e-07	1.12448	0.542	0.132	0.00876233	C_8
AGAP001751		Oxidation resistance protein [Source:VB Community Annotation]	3.2392e-10	1.1239	0.875	0.246	4.2534e-06	C_8
AGAP010818	TEP11	thioester-containing protein 11 [Source:VB Community Annotation]	1.87379e-09	1.12312	0.833	0.259	2.46047e-05	C_8
AGAP004397		alpha-1%2C6-mannosyl-glycoprotein beta-1%2C2-N-acetylglucosaminyltransferase [Source:VB Community Annotation]	1.5428e-12	1.12306	0.792	0.14	2.02585e-08	C_8
AGAP011341		Unknown	2.16825e-08	1.12295	0.542	0.101	0.000284712	C_8
AGAP008967		calcium/calmodulin-dependent 3'%2C5'-cyclic nucleotide phosphodiesterase [Source:VB Community Annotation]	2.6045e-11	1.12215	0.75	0.136	3.41997e-07	C_8
AGAP002505		voltage-dependent calcium channel alpha 1%2C invertebrate [Source:VB Community Annotation]	5.62185e-12	1.11832	0.708	0.118	7.38205e-08	C_8
AGAP010357		Unknown	3.43463e-12	1.11744	0.667	0.096	4.51002e-08	C_8
AGAP008202		potassium voltage-gated channel Shaw-related subfamily C%2C invertebrate [Source:VB Community Annotation]	1.46869e-11	1.11731	0.708	0.118	1.92854e-07	C_8
AGAP010232		all-trans-retinol dehydrogenase (NAD+) [Source:VB Community Annotation]	8.41796e-16	1.11386	0.75	0.092	1.10536e-11	C_8
AGAP010242		Roundabout [Source:VB Community Annotation]	4.25625e-13	1.11382	0.667	0.096	5.58888e-09	C_8
AGAP001627		solute carrier family 7 (cationic amino acid transporter%2C y+ system) [Source:VB Community Annotation]	6.06922e-11	1.11245	0.75	0.145	7.96949e-07	C_8
AGAP006026		Unknown	6.22581e-11	1.11237	0.542	0.075	8.17511e-07	C_8
AGAP002971	alpha8	nicotinic acetylcholine receptor subunit alpha 8 [Source:VB Community Annotation]	1.28402e-11	1.11222	0.75	0.127	1.68605e-07	C_8
AGAP012343		neuromusculin [Source:VB Community Annotation]	4.01713e-09	1.11188	0.542	0.088	5.27489e-05	C_8
AGAP007585		Unknown	1.2405e-13	1.11138	0.958	0.211	1.6289e-09	C_8
AGAP005465	GPRDIH2	putative diuretic insect hormone receptor 2 [Source:VB Community Annotation]	2.7216e-08	1.11077	0.625	0.132	0.000357373	C_8
AGAP007714		Ubiquinol-cytochrome c chaperone, CBP3	1.85395e-07	1.11065	0.583	0.132	0.00243442	C_8
AGAP003939		Unknown	9.47941e-13	1.10934	0.667	0.092	1.24474e-08	C_8
AGAP007203		DE-cadherin [Source:VB Community Annotation]	1.78863e-08	1.10599	0.583	0.123	0.000234865	C_8
AGAP001591		cadherin-87A [Source:VB Community Annotation]	1.44198e-09	1.10395	0.583	0.105	1.89346e-05	C_8
AGAP001962	GPRVPR1	GPCR vasopressin family receptor 1 [Source:VB Community Annotation]	4.21547e-12	1.10054	0.75	0.123	5.53533e-08	C_8
AGAP027995		F-box domain	7.92682e-12	1.09944	0.792	0.14	1.04087e-07	C_8
AGAP009757	ANCE7	angiotensin-converting enzyme 7 [Source:VB Community Annotation]	4.8304e-14	1.09889	0.75	0.114	6.3428e-10	C_8
AGAP010044		Unknown	3.32908e-08	1.09819	0.625	0.132	0.000437141	C_8
AGAP007854		membrane dipeptidase [Source:VB Community Annotation]	2.57241e-11	1.09723	0.625	0.096	3.37783e-07	C_8
AGAP028636		Unknown	1.10427e-08	1.09658	0.583	0.114	0.000145002	C_8
AGAP001328		tripartite motif-containing protein 33 [Source:VB Community Annotation]	1.32304e-08	1.09486	0.583	0.118	0.000173728	C_8
AGAP003473		Unknown	3.21471e-07	1.09101	0.542	0.123	0.00422123	C_8
AGAP008251		AP-1 complex subunit gamma-1 [Source:VB Community Annotation]	1.67736e-09	1.09061	0.625	0.123	2.20254e-05	C_8
AGAP028579		Unknown	1.64799e-10	1.08948	0.75	0.145	2.16398e-06	C_8
AGAP000637		solute carrier family 6 (neurotransmitter transporter%2C amino acid/orphan) [Source:VB Community Annotation]	8.96789e-12	1.0882	0.708	0.118	1.17757e-07	C_8
AGAP001061		Unknown	1.38788e-10	1.0878	0.625	0.101	1.82242e-06	C_8
AGAP004761		malate dehydrogenase (oxaloacetate-decarboxylating)(NADP+)	3.00263e-12	1.08589	0.667	0.096	3.94276e-08	C_8
AGAP009812		Unknown	1.20013e-09	1.08181	0.667	0.118	1.5759e-05	C_8
AGAP001696		signal peptidase%2C endoplasmic reticulum-type [Source:VB Community Annotation]	1.13087e-11	1.0798	0.708	0.123	1.48495e-07	C_8
AGAP009411	Or20	Unknown	5.36814e-07	1.07905	0.542	0.118	0.00704891	C_8
AGAP004627		Unknown	8.56992e-07	1.07901	0.583	0.149	0.0112532	C_8
AGAP003702		tolkin [Source:VB Community Annotation]	3.7238e-10	1.0766	0.542	0.083	4.88972e-06	C_8
AGAP002790		amyloid beta A4 protein [Source:VB Community Annotation]	2.99337e-11	1.0764	0.75	0.145	3.93059e-07	C_8
AGAP001633		Fibronectin type 3 domain; Immunoglobulin (Ig)-like domain	1.05055e-11	1.07577	0.792	0.171	1.37948e-07	C_8
AGAP007207		DE-cadherin [Source:VB Community Annotation]	5.34862e-11	1.07507	0.667	0.118	7.02327e-07	C_8
AGAP002150		hyperpolarization activated cyclic nucleotide-gated potassium channel 2 [Source:VB Community Annotation]	2.90594e-10	1.07414	0.667	0.123	3.81578e-06	C_8
AGAP006528		Unknown	8.83679e-11	1.07404	0.625	0.105	1.16036e-06	C_8
AGAP010290		wingless-type MMTV integration site family%2C member 5 [Source:VB Community Annotation]	2.02043e-07	1.07276	0.542	0.123	0.00265303	C_8
AGAP004367		Unknown	8.06824e-12	1.07205	0.833	0.167	1.05944e-07	C_8
AGAP003899	Sxl	sex-lethal [Source:VB Community Annotation]	8.73734e-10	1.07176	0.708	0.149	1.1473e-05	C_8
AGAP004548		LIM domain-containing protein [Source:VB Community Annotation]	4.29314e-08	1.07048	0.625	0.145	0.000563733	C_8
AGAP002886	GPRNNA2	putative GPCR class a orphan receptor 2 [Source:VB Community Annotation]	9.10479e-08	1.07045	0.542	0.11	0.00119555	C_8
AGAP002644		phospholipid-translocating ATPase [Source:VB Community Annotation]	2.37546e-10	1.0695	0.667	0.123	3.11922e-06	C_8
AGAP005162		dystroglycan 1 [Source:VB Community Annotation]	9.01623e-12	1.06771	0.833	0.171	1.18392e-07	C_8
AGAP010266		Unknown	6.02789e-13	1.06677	0.833	0.158	7.91522e-09	C_8
AGAP002898	GSTZ1	glutathione S-transferase zeta class 1 [Source:VB Community Annotation]	1.20077e-08	1.06637	0.542	0.101	0.000157673	C_8
AGAP010259		spineless	1.50572e-08	1.06618	0.542	0.101	0.000197716	C_8
AGAP013516		mitogen-activated protein kinase kinase kinase 7 [Source:VB Community Annotation]	9.04349e-10	1.06617	0.625	0.105	1.1875e-05	C_8
AGAP028544		Polypeptide N-acetylgalactosaminyltransferase [Source:UniProtKB/TrEMBL%3BAcc:A0A1S4HDL9]	1.15007e-09	1.06557	0.542	0.083	1.51016e-05	C_8
AGAP012711		Histone H2A [Source:UniProtKB/TrEMBL%3BAcc:Q7PD33]	9.77377e-07	1.0631	0.583	0.149	0.0128339	C_8
AGAP004827		Unknown	3.39298e-14	1.06278	0.833	0.136	4.45532e-10	C_8
AGAP007012		Unknown	5.72397e-08	1.06084	0.625	0.149	0.000751615	C_8
AGAP006731		Unknown	7.12556e-09	1.06081	0.583	0.114	9.35657e-05	C_8
AGAP004961		Unknown	1.27559e-10	1.06063	0.625	0.096	1.67498e-06	C_8
AGAP001936		phosphatidylinositol phospholipase C%2C beta [Source:VB Community Annotation]	1.78033e-09	1.0601	0.625	0.127	2.33776e-05	C_8
AGAP012305		Muscle LIM protein at 84B [Source:VB Community Annotation]	2.65183e-11	1.05672	0.583	0.079	3.48212e-07	C_8
AGAP006645		Unknown	8.6413e-08	1.05632	0.542	0.11	0.00113469	C_8
AGAP011418		Zinc finger, C2H2	4.46178e-09	1.05589	0.708	0.158	5.85876e-05	C_8
AGAP005987		Unknown	7.01723e-09	1.05483	0.542	0.096	9.21433e-05	C_8
AGAP013204		Unknown	1.05829e-09	1.0546	0.625	0.11	1.38964e-05	C_8
AGAP008688		Unknown	3.54526e-09	1.05315	0.583	0.105	4.65528e-05	C_8
AGAP004731		secretory phospholipase A2 [Source:VB Community Annotation]	6.61943e-09	1.0502	0.542	0.096	8.69197e-05	C_8
AGAP002310		protocadherin-15 [Source:VB Community Annotation]	8.43666e-13	1.04907	0.708	0.114	1.10782e-08	C_8
AGAP006403		polycomb group RING finger protein 4 [Source:VB Community Annotation]	9.90636e-11	1.04784	0.667	0.123	1.3008e-06	C_8
AGAP009210		CAP-Gly domain-containing linker protein 1 [Source:VB Community Annotation]	1.58287e-07	1.04778	0.667	0.18	0.00207846	C_8
AGAP008100		Spire [Source:VB Community Annotation]	2.48559e-08	1.04608	0.667	0.149	0.000326383	C_8
AGAP003579		cadherin-87A [Source:VB Community Annotation]	5.34652e-10	1.04427	0.75	0.167	7.02052e-06	C_8
AGAP028686		Unknown	4.34995e-07	1.04408	0.542	0.127	0.00571192	C_8
AGAP003550		Unknown	2.49491e-10	1.04254	0.667	0.118	3.27607e-06	C_8
AGAP002094		ancient conserved domain-containing protein 2 [Source:VB Community Annotation]	6.34446e-07	1.04178	0.583	0.14	0.00833091	C_8
AGAP000009		syntaxin-binding protein [Source:VB Community Annotation]	7.50896e-11	1.04123	0.833	0.18	9.86002e-07	C_8
AGAP005816		BAI1-associated protein 3 [Source:VB Community Annotation]	6.30298e-11	1.04116	0.583	0.083	8.27644e-07	C_8
AGAP028214		Unknown	6.23481e-11	1.04106	0.542	0.07	8.18692e-07	C_8
AGAP003709		potassium large conductance calcium-activated channel subfamily M alpha member [Source:VB Community Annotation]	7.34525e-14	1.04067	1	0.215	9.64505e-10	C_8
AGAP004314		exopolyphosphatase [Source:VB Community Annotation]	2.12461e-08	1.03922	0.583	0.11	0.000278982	C_8
AGAP007339		troponin C%2C isoform 3 [Source:VB Community Annotation]	9.27684e-12	1.039	0.625	0.083	1.21814e-07	C_8
AGAP007175		Phosphatidate cytidylyltransferase [Source:UniProtKB/TrEMBL%3BAcc:Q7QJ08]	8.30123e-10	1.03727	0.667	0.123	1.09003e-05	C_8
AGAP001935		Unknown	4.3791e-08	1.03613	0.625	0.14	0.00057502	C_8
AGAP011111		Unknown	1.82771e-07	1.03462	0.542	0.11	0.00239996	C_8
AGAP009087		PH domain and leucine-rich repeat-containing protein phosphatase [Source:VB Community Annotation]	4.5853e-09	1.0335	0.583	0.105	6.02096e-05	C_8
AGAP004877		paramyosin [Source:VB Community Annotation]	9.07858e-08	1.03335	0.542	0.114	0.00119211	C_8
AGAP007307		Rap guanine nucleotide exchange factor (GEF) 4 [Source:VB Community Annotation]	8.47864e-13	1.03111	0.792	0.132	1.11333e-08	C_8
AGAP001111		Unknown	2.40995e-08	1.03077	0.583	0.114	0.000316451	C_8
AGAP000028		calcium/calmodulin-dependent protein kinase (CaM kinase) II [Source:VB Community Annotation]	1.9215e-08	1.02958	0.583	0.118	0.000252312	C_8
AGAP009315		adenylate cyclase 3 [Source:VB Community Annotation]	1.29603e-09	1.0287	0.625	0.114	1.70181e-05	C_8
AGAP007562		Unknown	2.95355e-08	1.02846	0.625	0.14	0.000387831	C_8
AGAP001520		protein phosphatase 1%2C regulatory (inhibitor) subunit 3 [Source:VB Community Annotation]	5.53773e-09	1.02765	0.667	0.136	7.27159e-05	C_8
AGAP005219		Unknown	9.51453e-12	1.02715	0.792	0.158	1.24935e-07	C_8
AGAP000188		Uridine phosphorylase [Source:UniProtKB/TrEMBL%3BAcc:Q7PFX7]	5.73865e-08	1.0271	0.667	0.158	0.000753543	C_8
AGAP007675		dynein%2C axonemal heavy chain [Source:VB Community Annotation]	1.14939e-09	1.02658	0.625	0.118	1.50926e-05	C_8
AGAP028643		histone acetyltransferase MYST2 [Source:VB Community Annotation]	8.32094e-10	1.02474	0.708	0.145	1.09262e-05	C_8
AGAP004311		phosphopantothenate-cysteine ligase [Source:VB Community Annotation]	2.23098e-07	1.02228	0.625	0.154	0.0029295	C_8
AGAP010819	TEP10	thioester-containing protein 10 [Source:VB Community Annotation]	1.40239e-07	1.02067	0.667	0.193	0.00184148	C_8
AGAP001235		phosphatidylserine decarboxylase [Source:VB Community Annotation]	2.3916e-07	1.01878	0.583	0.136	0.00314041	C_8
AGAP010144		Unknown	2.04773e-09	1.01721	0.542	0.088	2.68888e-05	C_8
AGAP004090		5'-3' exoribonuclease 2 [Source:VB Community Annotation]	4.99749e-06	1.01709	0.542	0.149	0.065622	C_8
AGAP006656		RNA-binding protein Musashi [Source:VB Community Annotation]	7.52758e-09	1.01664	0.625	0.118	9.88446e-05	C_8
AGAP005064		Unknown	4.19235e-07	1.01465	0.542	0.123	0.00550497	C_8
AGAP006590		T-lymphoma invasion and metastasis-inducing protein 1 [Source:VB Community Annotation]	4.93748e-12	1.0139	0.833	0.154	6.4834e-08	C_8
AGAP009723		cadherin [Source:VB Community Annotation]	6.0436e-09	1.01231	0.708	0.167	7.93585e-05	C_8
AGAP004707	para	voltage-gated sodium channel [Source:VB Community Annotation]	9.57625e-12	1.01194	0.875	0.193	1.25746e-07	C_8
AGAP009995		anoctamin 10 [Source:VB Community Annotation]	9.7395e-11	1.00892	0.833	0.18	1.27889e-06	C_8
AGAP013474		Unknown	1.80723e-08	1.0087	0.625	0.127	0.000237307	C_8
AGAP028710		Unknown	5.20239e-09	1.00799	0.542	0.092	6.83126e-05	C_8
AGAP007646		Unknown	2.99897e-09	1.0067	0.667	0.14	3.93794e-05	C_8
AGAP000659		Sidekick homolog 2 [Source:VB Community Annotation]	3.74446e-09	1.00662	0.542	0.092	4.91684e-05	C_8
AGAP005828		Alpha-tubulin N-acetyltransferase [Source:UniProtKB/Swiss-Prot%3BAcc:Q7PNM6]	1.92026e-09	1.00619	0.583	0.101	2.5215e-05	C_8
AGAP005292		nucleolysin TIA-1/TIAR [Source:VB Community Annotation]	9.66834e-09	1.00544	0.542	0.092	0.000126955	C_8
AGAP028468		Unknown	5.7253e-08	1.00458	0.625	0.14	0.000751789	C_8
AGAP004258		Unknown	2.2908e-09	1.00444	0.583	0.101	3.00805e-05	C_8
AGAP003695		aminopeptidase N [Source:VB Community Annotation]	1.37204e-09	1.00285	0.625	0.114	1.80162e-05	C_8
AGAP000982		uncharacterized protein Enpp4 [Source:VB Community Annotation]	1.57826e-09	1.00191	0.542	0.083	2.07242e-05	C_8
AGAP004993		laminin subunit alpha [Source:VB Community Annotation]	3.72781e-06	-1.04298	0.917	0.864	0.0489499	C_8
AGAP028941	LSU_rRNA_eukarya	Eukaryotic large subunit ribosomal RNA [Source:RFAM%3BAcc:RF02543]	3.05369e-10	-1.07689	1	0.991	4.0098e-06	C_8
AGAP028918	LSU_rRNA_eukarya	Eukaryotic large subunit ribosomal RNA [Source:RFAM%3BAcc:RF02543]	1.79238e-12	-1.09394	1	0.978	2.35357e-08	C_8
AGAP028154		V-type proton ATPase proteolipid subunit [Source:UniProtKB/TrEMBL%3BAcc:A0A1S4HCY4]	8.43046e-07	-1.26478	0.667	0.807	0.01107	C_8
AGAP011284		Eukaryotic translation initiation factor 5A [Source:UniProtKB/TrEMBL%3BAcc:Q7PSR5]	1.31613e-06	-1.34838	0.708	0.781	0.0172821	C_8
AGAP028825	LSU_rRNA_eukarya	Eukaryotic large subunit ribosomal RNA [Source:RFAM%3BAcc:RF02543]	2.90737e-13	-1.36996	0.875	0.978	3.81766e-09	C_8
AGAP028464		Unknown	4.27178e-06	-1.4208	0.375	0.702	0.0560928	C_8
AGAP012990	RpS23	40S ribosomal protein S23 [Source:VB Community Annotation]	5.55496e-08	-1.4361	0.625	0.82	0.000729421	C_8
AGAP009441		elongation factor 2 [Source:VB Community Annotation]	5.90396e-09	-1.44529	0.75	0.864	7.75249e-05	C_8
AGAP001151		14-3-3 protein epsilon [Source:VB Community Annotation]	8.72045e-06	-1.45247	0.5	0.719	0.114508	C_8
AGAP009861		Profilin protein [Source:VB Community Annotation]	6.77947e-08	-1.47787	0.625	0.816	0.000890213	C_8
AGAP012407		protein disulfide-isomerase A1 [Source:VB Community Annotation]	9.93682e-06	-1.48268	0.5	0.706	0.13048	C_8
AGAP029054	NimB2	nimrod B2 [Source:VB Community Annotation]	3.90582e-13	-1.4846	0.958	0.982	5.12873e-09	C_8
AGAP028064	LRIM16B	leucine-rich immune protein (TM) [Source:VB Community Annotation]	2.74463e-06	-1.48491	0.458	0.741	0.0360397	C_8
AGAP004212	Crc	calreticulin [Source:VB Community Annotation]	3.19694e-06	-1.51107	0.542	0.741	0.041979	C_8
AGAP012708		Unknown	3.33488e-06	-1.51338	0.333	0.728	0.0437903	C_8
AGAP000654	RpS30	40S ribosomal protein S30 [Source:UniProtKB/TrEMBL%3BAcc:Q7QEH2]	3.72623e-09	-1.51869	0.583	0.842	4.89291e-05	C_8
AGAP006782		ADP%2CATP carrier protein 1 [Source:VB Community Annotation]	1.18784e-10	-1.52432	0.75	0.912	1.55976e-06	C_8
AGAP007699		GTP-binding nuclear protein Ran [Source:VB Community Annotation]	7.009e-06	-1.55002	0.375	0.684	0.0920352	C_8
AGAP001381		laminin%2C beta 1 [Source:VB Community Annotation]	7.52697e-07	-1.55071	0.542	0.785	0.00988366	C_8
AGAP002464		secreted ferritin G subunit [Source:VB Community Annotation]	1.10631e-07	-1.56334	0.542	0.794	0.0014527	C_8
AGAP004936		EGF repeats	4.44548e-13	-1.56976	0.958	0.965	5.83735e-09	C_8
AGAP002594		apolipoprotein D [Source:VB Community Annotation]	7.27148e-06	-1.58613	0.458	0.706	0.0954818	C_8
AGAP003768	RpS2	40S ribosomal protein S2 [Source:VB Community Annotation]	8.08241e-09	-1.62141	0.75	0.846	0.00010613	C_8
AGAP000235		Thymosin [Source:VB Community Annotation]	9.13472e-07	-1.62455	0.333	0.737	0.0119948	C_8
AGAP008075		cellular nucleic acid-binding protein [Source:VB Community Annotation]	7.49066e-08	-1.64017	0.5	0.811	0.000983598	C_8
AGAP011228		FBN2	4.39457e-07	-1.66108	0.583	0.82	0.00577051	C_8
AGAP011092		Polyadenylate-binding protein [Source:UniProtKB/TrEMBL%3BAcc:Q7QH99]	1.19974e-06	-1.66553	0.417	0.728	0.0157537	C_8
AGAP028364	COX1	cytochrome c oxidase subunit I [Source:European Nucleotide Archive%3BAcc:COX1]	5.4448e-14	-1.68684	0.958	1	7.14956e-10	C_8
AGAP002465		ferritin heavy chain [Source:VB Community Annotation]	2.54707e-08	-1.69304	0.5	0.807	0.000334455	C_8
AGAP004533		cathepsin B [Source:VB Community Annotation]	4.49557e-06	-1.6961	0.333	0.684	0.0590313	C_8
AGAP007088		peptidyl-prolyl cis-trans isomerase B (cyclophilin B) [Source:VB Community Annotation]	1.39609e-06	-1.70225	0.333	0.706	0.018332	C_8
AGAP028370	ATP6	adenosine triphosphatase subunit 6 [Source:European Nucleotide Archive%3BAcc:ATP6]	5.96145e-13	-1.70435	0.875	0.996	7.82797e-09	C_8
AGAP009537		cytochrome c [Source:VB Community Annotation]	6.13004e-06	-1.70678	0.333	0.675	0.0804936	C_8
AGAP028371	COX3	cytochrome c oxidase subunit III [Source:European Nucleotide Archive%3BAcc:COX3]	7.6253e-14	-1.7089	0.917	0.996	1.00128e-09	C_8
AGAP028380	ND5	NADH dehydrogenase subunit 5 [Source:European Nucleotide Archive%3BAcc:ND5]	8.37315e-12	-1.71067	0.833	0.978	1.09948e-07	C_8
AGAP006459	SUI1	Protein translation factor SUI1 homolog [Source:UniProtKB/Swiss-Prot%3BAcc:P42678]	1.50595e-07	-1.72573	0.5	0.781	0.00197747	C_8
AGAP010173	Rack1	guanine nucleotide-binding protein subunit beta-like protein [Source:VB Community Annotation]	1.89192e-08	-1.73195	0.417	0.798	0.000248428	C_8
AGAP001662		ADAM-TS Spacer 1	4.25548e-08	-1.73309	0.458	0.807	0.000558787	C_8
AGAP001813		Histone H3 [Source:UniProtKB/TrEMBL%3BAcc:Q7PUQ8]	2.13244e-07	-1.73665	0.333	0.746	0.00280011	C_8
AGAP012515		F-type H+-transporting ATPase subunit f [Source:VB Community Annotation]	5.22226e-06	-1.74698	0.333	0.671	0.0685735	C_8
AGAP028366	COX2	cytochrome c oxidase subunit II [Source:European Nucleotide Archive%3BAcc:COX2]	2.57816e-13	-1.75136	0.792	0.991	3.38538e-09	C_8
AGAP028391	lsu rRNA	lsu rRNA	1.89617e-13	-1.75364	0.958	0.991	2.48985e-09	C_8
AGAP011077	RpS12	40S ribosomal protein S12 [Source:UniProtKB/TrEMBL%3BAcc:Q7PSP8]	4.42297e-09	-1.75698	0.375	0.82	5.8078e-05	C_8
AGAP028387	CYTB	cytochrome b [Source:European Nucleotide Archive%3BAcc:CYTB]	9.96993e-14	-1.75814	0.875	1	1.30915e-09	C_8
AGAP011298	RpL10a	60S ribosomal protein L10a [Source:VB Community Annotation]	3.01547e-09	-1.77091	0.417	0.825	3.95961e-05	C_8
AGAP003025	RpLp2	60S ribosomal protein LP2 [Source:VB Community Annotation]	2.83324e-09	-1.77644	0.458	0.825	3.72033e-05	C_8
AGAP004395		nucleophosmin 3 [Source:VB Community Annotation]	3.25866e-06	-1.77771	0.333	0.68	0.0427894	C_8
AGAP012184		FK506-binding protein 1 [Source:VB Community Annotation]	4.25136e-06	-1.77854	0.292	0.68	0.0558246	C_8
AGAP028389	ND1	NADH dehydrogenase subunit 1 [Source:European Nucleotide Archive%3BAcc:ND1]	1.16808e-12	-1.77995	0.75	0.969	1.53381e-08	C_8
AGAP000651	Actin5C	Actin-5C [Source:UniProtKB/Swiss-Prot%3BAcc:P84185]	3.05844e-11	-1.78527	0.708	0.921	4.01604e-07	C_8
AGAP010257	RpL13a	60S ribosomal protein L13a [Source:VB Community Annotation]	2.05301e-10	-1.7875	0.542	0.873	2.69581e-06	C_8
AGAP007406		Elongation factor 1-alpha [Source:UniProtKB/TrEMBL%3BAcc:Q7PT29]	2.80193e-12	-1.79099	0.792	0.952	3.67922e-08	C_8
AGAP028382	ND4	NADH dehydrogenase subunit 4 [Source:European Nucleotide Archive%3BAcc:ND4]	2.96144e-12	-1.79653	0.708	0.974	3.88867e-08	C_8
AGAP003556	RpL3	60S ribosomal protein L3 [Source:VB Community Annotation]	5.48335e-09	-1.80333	0.458	0.816	7.20019e-05	C_8
AGAP012418		Unknown	2.17986e-06	-1.82594	0.208	0.68	0.0286237	C_8
AGAP001470		Phosphoinositide-dependent kinase 1	1.25853e-06	-1.82715	0.375	0.719	0.0165258	C_8
AGAP004017	LRR8	Leucine rich repeat (LRR)	1.23907e-06	-1.83729	0.417	0.719	0.0162703	C_8
AGAP008822		FK506-binding protein 14 [Source:VB Community Annotation]	5.49004e-06	-1.8387	0.292	0.667	0.0720897	C_8
AGAP028028	LRIM16A	leucine-rich immune protein (TM) [Source:VB Community Annotation]	1.99456e-07	-1.85783	0.417	0.768	0.00261905	C_8
AGAP028439		Unknown	3.74909e-06	-1.86065	0.208	0.649	0.0492293	C_8
AGAP000305		SPARC [Source:VB Community Annotation]	7.7339e-11	-1.86441	0.625	0.89	1.01554e-06	C_8
AGAP002754	RpL35a	60S ribosomal protein L35a [Source:VB Community Annotation]	2.56735e-10	-1.8731	0.417	0.864	3.37119e-06	C_8
AGAP000790		Calycin-like	1.88704e-08	-1.87369	0.5	0.803	0.000247787	C_8
AGAP011197	FBN9	FBN9	6.12782e-11	-1.87668	0.667	0.899	8.04644e-07	C_8
AGAP006766		nascent polypeptide-associated complex subunit alpha [Source:VB Community Annotation]	3.21821e-07	-1.87886	0.417	0.741	0.00422584	C_8
AGAP000655	RpS14-1	40S ribosomal protein S14a [Source:UniProtKB/Swiss-Prot%3BAcc:Q7QEH1]	8.71681e-08	-1.87907	0.333	0.75	0.0011446	C_8
AGAP001805	RpL13	60S ribosomal protein L13 [Source:UniProtKB/TrEMBL%3BAcc:Q7PUQ7]	1.88196e-09	-1.88527	0.417	0.825	2.4712e-05	C_8
AGAP010065	RpL12	60S ribosomal protein L12 [Source:VB Community Annotation]	4.97874e-09	-1.89234	0.375	0.807	6.53758e-05	C_8
AGAP028373	ND3	NADH dehydrogenase subunit 3 [Source:European Nucleotide Archive%3BAcc:ND3]	9.75366e-11	-1.90577	0.625	0.965	1.28075e-06	C_8
AGAP011173	RpL11	60S ribosomal protein L11 [Source:VB Community Annotation]	4.59468e-09	-1.91742	0.458	0.82	6.03327e-05	C_8
AGAP003663		ATP-dependent RNA helicase DBP2 [Source:VB Community Annotation]	5.95261e-06	-1.92558	0.25	0.654	0.0781637	C_8
AGAP002667	Tctp	Translationally-controlled tumor protein homolog [Source:UniProtKB/Swiss-Prot%3BAcc:Q7QCK2]	4.71911e-09	-1.93827	0.417	0.825	6.19666e-05	C_8
AGAP002422	CLIPD1	CLIP-domain serine protease [Source:VB Community Annotation]	3.11933e-08	-1.94028	0.458	0.789	0.000409599	C_8
AGAP003532	RpS3a	40S ribosomal protein S3a [Source:UniProtKB/Swiss-Prot%3BAcc:P52813]	1.70839e-11	-1.95822	0.5	0.899	2.24329e-07	C_8
AGAP010163	RpL38	60S ribosomal protein L38 [Source:UniProtKB/Swiss-Prot%3BAcc:Q7Q0U1]	2.5631e-09	-1.9586	0.417	0.825	3.36561e-05	C_8
AGAP011687	RpL27	60S ribosomal protein L27 [Source:UniProtKB/TrEMBL%3BAcc:Q5TMJ9]	2.50177e-10	-1.9685	0.542	0.864	3.28508e-06	C_8
AGAP011974	SCRC1	Class C Scavenger Receptor (Sushi/SCR/CCP and Somatomedin B domains). [Source:VB Community Annotation]	1.7891e-07	-1.97449	0.333	0.741	0.00234927	C_8
AGAP011424	RpS16	40S ribosomal protein S16 [Source:VB Community Annotation]	1.46796e-09	-1.97675	0.375	0.825	1.92758e-05	C_8
AGAP007740	RpLP1	60S ribosomal protein LP1 [Source:VB Community Annotation]	4.76449e-11	-1.97686	0.417	0.882	6.25626e-07	C_8
AGAP011706	RpL27a	60S ribosomal protein L27a [Source:VB Community Annotation]	2.98498e-09	-1.99098	0.417	0.82	3.91958e-05	C_8
AGAP010957		calmodulin [Source:VB Community Annotation]	4.59431e-06	-1.99694	0.208	0.636	0.0603279	C_8
AGAP006278		Odorant-binding protein 99a - Drosophila melanogaster	4.46224e-06	-2.02996	0.208	0.636	0.0585937	C_8
AGAP009998	RpS11	40S ribosomal protein S11 [Source:UniProtKB/Swiss-Prot%3BAcc:P52812]	1.27027e-09	-2.03142	0.333	0.816	1.668e-05	C_8
AGAP004887	RpS17	40S ribosomal protein S17 [Source:UniProtKB/Swiss-Prot%3BAcc:Q9U9L1]	6.07292e-11	-2.04146	0.417	0.873	7.97435e-07	C_8
AGAP028997	SSU_rRNA_eukarya	Eukaryotic small subunit ribosomal RNA [Source:RFAM%3BAcc:RF01960]	6.80296e-07	-2.04587	0.167	0.684	0.00893297	C_8
AGAP000883		elongation factor 1-gamma [Source:VB Community Annotation]	1.33758e-07	-2.04622	0.292	0.737	0.00175638	C_8
AGAP008329	RpS5	40S ribosomal protein S5 [Source:VB Community Annotation]	4.13825e-09	-2.06627	0.333	0.803	5.43394e-05	C_8
AGAP013333		Phosphate carrier%2C mitochondrial [Source:VB Community Annotation]	5.49832e-07	-2.07523	0.208	0.684	0.00721984	C_8
AGAP028876	SSU_rRNA_eukarya	Eukaryotic small subunit ribosomal RNA [Source:RFAM%3BAcc:RF01960]	4.10503e-09	-2.07523	0.292	0.798	5.39031e-05	C_8
AGAP004016		Leucine-rich repeats (LRRs)	2.08287e-08	-2.07929	0.25	0.759	0.000273501	C_8
AGAP003538	RpL36a	60S ribosomal protein L36a [Source:VB Community Annotation]	8.31537e-09	-2.08534	0.292	0.794	0.000109189	C_8
AGAP028383	ND4L	NADH dehydrogenase subunit 4L [Source:European Nucleotide Archive%3BAcc:ND4L]	1.14229e-11	-2.09515	0.5	0.952	1.49994e-07	C_8
AGAP004349		K homology RNA-binding domain	2.20023e-07	-2.1076	0.292	0.719	0.00288913	C_8
AGAP007393		protein disulfide isomerase family A%2C member 3 [Source:VB Community Annotation]	3.76991e-06	-2.11812	0.292	0.667	0.0495027	C_8
AGAP001595	RpS29	40S ribosomal protein S29 [Source:VB Community Annotation]	4.52527e-08	-2.12312	0.167	0.732	0.000594213	C_8
AGAP007087	RpL41	60s ribosomal protein L41 [Source:UniProtKB/TrEMBL%3BAcc:Q52P89]	3.80079e-11	-2.12342	0.417	0.877	4.99082e-07	C_8
AGAP002122	RpL32	60S ribosomal protein L32 [Source:VB Community Annotation]	5.27168e-09	-2.12599	0.333	0.794	6.92224e-05	C_8
AGAP004422	RpL19	60S ribosomal protein L19 [Source:VB Community Annotation]	6.25037e-10	-2.13271	0.333	0.829	8.20736e-06	C_8
AGAP005427	RpL28	60S ribosomal protein L28 [Source:VB Community Annotation]	8.02951e-10	-2.13419	0.333	0.825	1.05436e-05	C_8
AGAP005960	RpL7a	60S ribosomal protein L7a [Source:UniProtKB/Swiss-Prot%3BAcc:O76732]	3.18046e-10	-2.14185	0.375	0.846	4.17626e-06	C_8
AGAP004462	RpS25	40S ribosomal protein S25 [Source:VB Community Annotation]	2.21091e-10	-2.15731	0.333	0.846	2.90315e-06	C_8
AGAP009031	RpL5	60S ribosomal protein L5 [Source:VB Community Annotation]	9.81741e-09	-2.15991	0.375	0.794	0.000128912	C_8
AGAP005061	RpS9	40S ribosomal protein S9 [Source:VB Community Annotation]	6.31571e-09	-2.16425	0.292	0.785	8.29316e-05	C_8
AGAP028980	SSU_rRNA_eukarya	Eukaryotic small subunit ribosomal RNA [Source:RFAM%3BAcc:RF01960]	6.14747e-07	-2.16545	0.125	0.689	0.00807224	C_8
AGAP005134		F-type H+-transporting ATPase subunit alpha [Source:VB Community Annotation]	1.20977e-06	-2.16603	0.167	0.658	0.0158855	C_8
AGAP008916	RpL7	60S ribosomal protein L7 [Source:VB Community Annotation]	3.17804e-11	-2.18674	0.458	0.886	4.17308e-07	C_8
AGAP010252	RpL23	60S ribosomal protein L23 [Source:VB Community Annotation]	2.22765e-09	-2.1868	0.333	0.807	2.92512e-05	C_8
AGAP007927	RpL40	60S ribosomal protein L40 [Source:VB Community Annotation]	1.08219e-09	-2.18878	0.292	0.816	1.42103e-05	C_8
AGAP003816	RpL30	60S ribosomal protein L30 [Source:VB Community Annotation]	1.14097e-09	-2.19176	0.25	0.807	1.49821e-05	C_8
AGAP006871	RpS4	40S ribosomal protein S4 [Source:UniProtKB/TrEMBL%3BAcc:Q7PT95]	2.08704e-10	-2.19392	0.333	0.846	2.7405e-06	C_8
AGAP006961		molecular chaperone HtpG [Source:VB Community Annotation]	3.18622e-06	-2.20404	0.208	0.64	0.0418382	C_8
AGAP003592	RpLP0	60S ribosomal protein LP0 [Source:VB Community Annotation]	4.47454e-12	-2.20418	0.458	0.908	5.87552e-08	C_8
AGAP009920	RpL37a	60S ribosomal protein L37a [Source:VB Community Annotation]	1.99691e-09	-2.2062	0.333	0.807	2.62215e-05	C_8
AGAP029038	SSU_rRNA_eukarya	Eukaryotic small subunit ribosomal RNA [Source:RFAM%3BAcc:RF01960]	6.59476e-08	-2.22767	0.167	0.719	0.000865958	C_8
AGAP009863		eukaryotic translation initiation factor 4A%2C isoform 2 [Source:VB Community Annotation]	4.70145e-08	-2.23543	0.208	0.737	0.000617347	C_8
AGAP000927		myosin regulatory light chain%2C invertebrate [Source:VB Community Annotation]	8.04042e-08	-2.25233	0.292	0.737	0.00105579	C_8
AGAP004192		heat shock 70kDa protein 5 [Source:VB Community Annotation]	1.08804e-06	-2.28052	0.125	0.645	0.014287	C_8
AGAP009201		collagen type IV alpha [Source:VB Community Annotation]	9.96354e-08	-2.28343	0.292	0.737	0.00130831	C_8
AGAP006037	RpL24	60S ribosomal protein L24 [Source:VB Community Annotation]	3.06081e-10	-2.28592	0.375	0.842	4.01914e-06	C_8
AGAP009431	RpS21	40S ribosomal protein S21 [Source:UniProtKB/TrEMBL%3BAcc:Q7PTN4]	7.97416e-10	-2.28803	0.208	0.816	1.04709e-05	C_8
AGAP005802	RpL8	60S ribosomal protein L8 [Source:UniProtKB/Swiss-Prot%3BAcc:Q9U9L2]	4.09326e-11	-2.29487	0.375	0.873	5.37486e-07	C_8
AGAP012138	RpL21	60S ribosomal protein L21 [Source:VB Community Annotation]	7.68157e-10	-2.31199	0.25	0.811	1.00867e-05	C_8
AGAP028693	RpS18	40S ribosomal protein S18 [Source:VB Community Annotation]	1.44295e-10	-2.31677	0.292	0.842	1.89474e-06	C_8
AGAP000415		5-hydroxyisourate hydrolase [Source:VB Community Annotation]	5.86119e-06	-2.31883	0.125	0.601	0.0769632	C_8
AGAP028386	ND6	NADH dehydrogenase subunit 6 [Source:European Nucleotide Archive%3BAcc:ND6]	2.85902e-10	-2.3189	0.417	0.939	3.75418e-06	C_8
AGAP012307		Spondin-1 [Source:VB Community Annotation]	4.67408e-06	-2.3225	0.125	0.596	0.0613753	C_8
AGAP010592	S7	40S ribosomal protein S7 [Source:UniProtKB/Swiss-Prot%3BAcc:P33514]	5.98212e-09	-2.33386	0.25	0.776	7.85513e-05	C_8
AGAP000952	RpL37	60S ribosomal protein L37 [Source:VB Community Annotation]	2.10772e-11	-2.34949	0.375	0.877	2.76765e-07	C_8
AGAP028360	ND2	NADH dehydrogenase subunit 2 [Source:European Nucleotide Archive%3BAcc:ND2]	1.70523e-10	-2.37647	0.417	0.939	2.23914e-06	C_8
AGAP006944	eIF3e	Eukaryotic translation initiation factor 3 subunit E [Source:UniProtKB/Swiss-Prot%3BAcc:Q7QIL8]	9.52796e-06	-2.37813	0.083	0.575	0.125112	C_8
AGAP011777	RpSA	40S ribosomal protein SA [Source:UniProtKB/Swiss-Prot%3BAcc:Q7PZ81]	2.00121e-10	-2.37825	0.292	0.838	2.62779e-06	C_8
AGAP012100	RpS26	40S ribosomal protein S26 [Source:UniProtKB/Swiss-Prot%3BAcc:Q9GT45]	5.53706e-11	-2.38909	0.292	0.855	7.27072e-07	C_8
AGAP010876		molecular chaperone DnaK [Source:VB Community Annotation]	3.57497e-06	-2.4015	0.167	0.623	0.0469429	C_8
AGAP006958	Hsp83	Heat shock protein 83 [Source:UniProtKB/Swiss-Prot%3BAcc:Q7PT10]	5.86391e-09	-2.40231	0.25	0.781	7.69989e-05	C_8
AGAP013103		Anopheles-specific TM protein	8.21543e-08	-2.40518	0.167	0.706	0.00107877	C_8
AGAP000739	RpS10	40S ribosomal protein S10 [Source:VB Community Annotation]	3.53881e-10	-2.40851	0.292	0.829	4.64682e-06	C_8
AGAP007120		nucleoside-diphosphate kinase [Source:VB Community Annotation]	7.68157e-10	-2.41822	0.25	0.811	1.00867e-05	C_8
AGAP009324	RpL34	60S ribosomal protein L34 [Source:VB Community Annotation]	3.76785e-10	-2.42593	0.208	0.82	4.94756e-06	C_8
AGAP006959		molecular chaperone HtpG [Source:VB Community Annotation]	3.09489e-06	-2.42731	0.125	0.61	0.040639	C_8
AGAP000523		F-type H+-transporting ATPase subunit c [Source:VB Community Annotation]	6.40449e-07	-2.42761	0.125	0.645	0.00840974	C_8
AGAP002395	RpL10-2	60S ribosomal protein L10-2 [Source:VB Community Annotation]	6.08857e-10	-2.42829	0.292	0.82	7.9949e-06	C_8
AGAP009584	TRX1	Thioredoxin [Source:UniProtKB/TrEMBL%3BAcc:Q9NGZ1]	1.03076e-07	-2.43234	0.167	0.702	0.00135348	C_8
AGAP009907		leukotriene-A4 hydrolase [Source:VB Community Annotation]	3.75159e-06	-2.4334	0.125	0.623	0.0492621	C_8
AGAP008724		mitochondrial cytochrome c oxidase subunit 5B isoform 1 [Source:VB Community Annotation]	2.21357e-06	-2.43412	0.125	0.618	0.0290663	C_8
AGAP009200		collagen type IV alpha [Source:VB Community Annotation]	1.82445e-10	-2.43674	0.333	0.855	2.39569e-06	C_8
AGAP000376	Tsf1	transferrin 1	1.71315e-11	-2.45235	0.333	0.89	2.24954e-07	C_8
AGAP010337		ubiquinol-cytochrome c reductase subunit 8 [Source:VB Community Annotation]	5.80295e-06	-2.4925	0.083	0.575	0.0761985	C_8
AGAP028369	ATP8	adenosine triphosphatase subunit 8 [Source:European Nucleotide Archive%3BAcc:ATP8]	1.71305e-11	-2.50085	0.333	0.939	2.24941e-07	C_8
AGAP001408	RpL35	60S ribosomal protein L35 [Source:VB Community Annotation]	4.58901e-09	-2.5029	0.208	0.772	6.02582e-05	C_8
AGAP009508	RpL9	60S ribosomal protein L9 [Source:VB Community Annotation]	2.82999e-10	-2.51801	0.208	0.82	3.71606e-06	C_8
AGAP002076		heat shock 70kDa protein 1/8 [Source:VB Community Annotation]	4.0319e-12	-2.51805	0.458	0.908	5.29428e-08	C_8
AGAP028970	LSU_rRNA_eukarya	Eukaryotic large subunit ribosomal RNA [Source:RFAM%3BAcc:RF02543]	9.91293e-08	-2.53953	0.125	0.702	0.00130167	C_8
AGAP000462		peptidyl-prolyl isomerase F (cyclophilin D) [Source:VB Community Annotation]	3.54838e-08	-2.55468	0.208	0.732	0.000465938	C_8
AGAP013742		40S ribosomal protein S27a [Source:VB Community Annotation]	6.16292e-11	-2.56498	0.25	0.851	8.09253e-07	C_8
AGAP005046	RpL22	60S ribosomal protein L22 [Source:VB Community Annotation]	4.93506e-10	-2.58242	0.208	0.807	6.48022e-06	C_8
AGAP011131		F-type H+-transporting ATPase subunit d [Source:VB Community Annotation]	2.39712e-06	-2.58305	0.125	0.61	0.0314765	C_8
AGAP010933	RpS19	40S ribosomal protein S19 [Source:VB Community Annotation]	2.88469e-10	-2.58471	0.208	0.82	3.78788e-06	C_8
AGAP001274	RpS15	40S ribosomal protein S15 [Source:VB Community Annotation]	1.53456e-10	-2.59281	0.25	0.833	2.01503e-06	C_8
AGAP002437	RpS8	40S ribosomal protein S8 [Source:UniProtKB/TrEMBL%3BAcc:Q7QC42]	1.4985e-11	-2.60299	0.292	0.877	1.96769e-07	C_8
AGAP028393	ssu rRNA	ssu rRNA	6.93502e-11	-2.62859	0.292	0.895	9.10637e-07	C_8
AGAP003119		translation initiation factor 1A [Source:VB Community Annotation]	8.43084e-07	-2.64163	0.125	0.636	0.0110705	C_8
AGAP011054	TPX2	thioredoxin peroxidase 2 [Source:VB Community Annotation]	2.02617e-08	-2.66623	0.167	0.732	0.000266056	C_8
AGAP010591	RpS20	40S ribosomal protein S20 [Source:VB Community Annotation]	1.69625e-10	-2.67364	0.208	0.829	2.22734e-06	C_8
AGAP002306	RpL4	60S ribosomal protein L4 [Source:VB Community Annotation]	1.72367e-10	-2.67583	0.25	0.833	2.26335e-06	C_8
AGAP011159	CoVa	cytochrome c oxidase subunit Va [Source:VB Community Annotation]	2.77022e-06	-2.68028	0.083	0.592	0.0363758	C_8
AGAP000249		mannosyl-glycoprotein endo-beta-N-acetylglucosaminidase [Source:VB Community Annotation]	6.30982e-09	-2.68327	0.25	0.776	8.28542e-05	C_8
AGAP002468	RpL26	60S ribosomal protein L26 [Source:VB Community Annotation]	5.36522e-11	-2.72994	0.25	0.851	7.04506e-07	C_8
AGAP006612	RpL29	60S ribosomal protein L29 [Source:VB Community Annotation]	1.97276e-09	-2.73408	0.125	0.768	2.59043e-05	C_8
AGAP005558		peptidase (mitochondrial processing) beta [Source:VB Community Annotation]	7.08312e-06	-2.76551	0.042	0.544	0.0930084	C_8
AGAP005991	RpL14	60S ribosomal protein L14 [Source:VB Community Annotation]	7.51736e-11	-2.7682	0.208	0.838	9.87105e-07	C_8
AGAP001911	RpL6	60S ribosomal protein L6 [Source:VB Community Annotation]	3.18683e-10	-2.78599	0.167	0.811	4.18462e-06	C_8
AGAP011896	RpL31	60S ribosomal protein L31 [Source:VB Community Annotation]	4.43503e-10	-2.79281	0.167	0.803	5.82364e-06	C_8
AGAP002921	RpL36	60S ribosomal protein L36 [Source:UniProtKB/TrEMBL%3BAcc:Q7PQY8]	3.83906e-11	-2.79506	0.167	0.846	5.04107e-07	C_8
AGAP010612		elongation factor 1-beta [Source:VB Community Annotation]	9.73979e-07	-2.79665	0.042	0.605	0.0127893	C_8
AGAP002599		polyubiquitin [Source:VB Community Annotation]	4.61136e-08	-2.80767	0.167	0.715	0.000605517	C_8
AGAP000541	RpS15a-1	40S ribosomal protein S15a [Source:VB Community Annotation]	3.87036e-10	-2.81556	0.167	0.807	5.08217e-06	C_8
AGAP002346	RpS14-2	40S ribosomal protein S14b [Source:UniProtKB/Swiss-Prot%3BAcc:Q7QBX2]	9.21964e-09	-2.81663	0.125	0.737	0.000121063	C_8
AGAP008909		phosphatidylethanolamine binding	1.88157e-09	-2.83532	0.083	0.768	2.47069e-05	C_8
AGAP013092		cytochrome c oxidase subunit VIb polypeptide 1 [Source:VB Community Annotation]	5.37495e-06	-2.85045	0.083	0.57	0.0705785	C_8
AGAP007157	RpS27	40S ribosomal protein S27 [Source:UniProtKB/TrEMBL%3BAcc:Q7PT96]	8.4741e-10	-2.88887	0.167	0.789	1.11273e-05	C_8
AGAP001459	RpL17	60S ribosomal protein L17 [Source:UniProtKB/Swiss-Prot%3BAcc:A0NGY0]	4.73215e-12	-2.89575	0.208	0.886	6.21378e-08	C_8
AGAP010216	RpL25	60S ribosomal protein L25 [Source:VB Community Annotation]	4.94449e-09	-2.89742	0.125	0.75	6.49261e-05	C_8
AGAP008727		cytochrome c oxidase subunit 4%2C mitochondrial precursor [Source:VB Community Annotation]	8.73382e-07	-2.90802	0.083	0.618	0.0114684	C_8
AGAP001910	RpS3	40S ribosomal protein S3 [Source:VB Community Annotation]	1.47342e-10	-2.91614	0.125	0.816	1.93475e-06	C_8
AGAP010392		calumenin [Source:VB Community Annotation]	1.39499e-06	-2.95261	0.083	0.605	0.0183177	C_8
AGAP007580	RpL18	60S ribosomal protein L18 [Source:UniProtKB/Swiss-Prot%3BAcc:Q7QJM5]	3.25991e-10	-2.95953	0.167	0.807	4.28059e-06	C_8
AGAP004919	RpL15	60S ribosomal protein L15 [Source:UniProtKB/Swiss-Prot%3BAcc:P52818]	2.54853e-10	-2.98673	0.125	0.807	3.34647e-06	C_8
AGAP009491		F-type H+-transporting ATPase subunit g [Source:VB Community Annotation]	1.07024e-07	-2.98798	0.042	0.667	0.00140533	C_8
AGAP011802	RpL39	60S ribosomal protein L39 [Source:VB Community Annotation]	4.4216e-10	-2.9911	0.125	0.794	5.806e-06	C_8
AGAP000092		methylsterol monooxygenase [Source:VB Community Annotation]	8.21054e-06	-3.04756	0.042	0.535	0.107813	C_8
AGAP005131	RpS24	40S ribosomal protein S24 [Source:UniProtKB/TrEMBL%3BAcc:Q7PQ02]	1.21791e-11	-3.0957	0.125	0.86	1.59924e-07	C_8
AGAP005947	RpS13	40S ribosomal protein S13 [Source:UniProtKB/Swiss-Prot%3BAcc:P52811]	1.48587e-10	-3.15284	0.083	0.807	1.95109e-06	C_8
AGAP000953	RpL10-1	60S ribosomal protein L10-1 [Source:VB Community Annotation]	4.1764e-10	-3.17249	0.125	0.794	5.48403e-06	C_8
AGAP012284	RpL18a-1	60S ribosomal protein L18a [Source:UniProtKB/TrEMBL%3BAcc:Q7PV82]	6.31606e-11	-3.17289	0.125	0.829	8.29362e-07	C_8
AGAP006614		transcription factor BTF3 homolog 4 [Source:VB Community Annotation]	2.08559e-09	-3.17823	0.083	0.754	2.73859e-05	C_8
AGAP002919	RpS6	40S ribosomal protein S6 [Source:VB Community Annotation]	4.10473e-11	-3.22268	0.167	0.842	5.38992e-07	C_8
AGAP003412	RpS28	40S ribosomal protein S28 [Source:VB Community Annotation]	7.87813e-09	-3.23529	0.042	0.715	0.000103448	C_8
AGAP009572	RpS15a-2	40S ribosomal protein S15a [Source:VB Community Annotation]	5.93683e-08	-3.24611	0.042	0.667	0.000779565	C_8
AGAP008491		oligosaccharyltransferase complex subunit epsilon [Source:VB Community Annotation]	6.01514e-06	-3.26079	0.042	0.544	0.0789848	C_8
AGAP028979	SSU_rRNA_eukarya	Eukaryotic small subunit ribosomal RNA [Source:RFAM%3BAcc:RF01960]	1.62446e-07	-3.30232	0	0.623	0.00213308	C_8
AGAP003599		F-type H+-transporting ATPase oligomycin sensitivity conferral protein [Source:VB Community Annotation]	1.33997e-06	-3.30535	0.042	0.588	0.0175952	C_8
AGAP005935		UPF0197	5.25637e-06	-3.31597	0.042	0.548	0.0690213	C_8
AGAP001971		Polyubiquitin-C [Source:VB Community Annotation]	9.25296e-07	-3.35503	0.042	0.596	0.0121501	C_8
AGAP004296		signal peptidase complex subunit 1 [Source:VB Community Annotation]	7.06339e-06	-3.64723	0	0.513	0.0927494	C_8
AGAP002878		Cystatin-like protein [Source:VB Community Annotation]	9.28614e-06	-3.69708	0	0.504	0.121936	C_8
AGAP011107	GRX1	glutaredoxin [Source:VB Community Annotation]	6.1512e-06	-3.85599	0	0.518	0.0807715	C_8
AGAP000804	GPXH2	glutathione peroxidase 2 [Source:VB Community Annotation]	9.28508e-07	-3.92549	0	0.575	0.0121922	C_8
