# Supplementary material for: Single-cell analysis of mosquito hemocytes identifies signatures of immune cell subtypes and cell differentiation
Source: eLife. 2021 Jul 28;10:e66192. doi: 10.7554/eLife.66192 (PMC8376254; doi:10.7554/eLife.66192)
Supplement: Supplementary file 1. [file elife-66192-supp1.xlsx]

## Sheet: Sheet1
cell	status	gating	cluster	AGAP000002	AGAP000005	AGAP000007	AGAP000008	AGAP000009	AGAP000010	AGAP000011	AGAP000012	AGAP000013	AGAP000014	AGAP000015	AGAP000016	AGAP000017	AGAP000018	AGAP000019	AGAP000020	AGAP000021	AGAP000022	AGAP000023	AGAP000025	AGAP000028	AGAP000029	AGAP000032	AGAP000033	AGAP000035	AGAP000037	AGAP000038	AGAP000039	AGAP000040	AGAP000041	AGAP000042	AGAP000043	AGAP000044	AGAP000045	AGAP000046	AGAP000047	AGAP000048	AGAP000049	AGAP000051	AGAP000053	AGAP000054	AGAP000055	AGAP000056	AGAP000057	AGAP000058	AGAP000061
M21	blood	G2	1	4.51898	0	0	0	0	0	0	0	1.53832	0	2.6947	0	4.19312	0	6.87952	0	2.72322	0	0	0	0	0	0	0	0	0	0	0	0	0	0	2.4192	2.07415	0	0	0	3.01254	0	0	0	2.58974	0	6.59825	0	0	2.45512
A8	naive	G1	1	4.07546	7.75736	0	4.61942	4.69252	5.22786	6.33515	0	6.18251	6.28117	3.97325	0	3.44011	4.13639	0	3.28516	0	6.51114	0	3.84512	6.54648	0	3.69261	0	0	0	4.96381	0	0	5.20804	4.40325	0	0	0	0	0	3.39181	4.23614	0	0	0	4.84714	0	0	0	0
E3	naive	G3	1	0	2.46042	3.06835	0	0	0	0	0	0	0	0	0	0	2.21473	0	0	0	0	4.28229	0	9.25619	1.00139	0	0	0	2.9398	0	4.06871	2.22527	0	0	0	9.21775	0	0	0	7.02546	0	4.57014	0	0	0	0	0	0.990482	5.65444
I20	naive	G4	1	3.63144	5.13579	0	7.59613	0	0	0	0	4.86135	0	1.95651	0	0	0	0	0	7.76666	0	0	0	0	0	5.71204	0	0	0	1.57179	0	2.91838	0	0	0	6.92211	0	0	0	0	0	0	0	0.824249	0	0	0	0.526341	0
B9	naive	G1	1	0	0	0	0	0	0	0	0	0	0	0	7.29491	4.42641	0	0	0	0	0	0	0	3.40874	0	0	3.87019	4.0427	0	0	0	3.81378	0	0	3.01608	0	0	0	0	0	0	0	5.39603	2.8355	0	0	0	0	0
B17	naive	G1	1	3.22108	8.07198	0	7.09966	4.76005	2.27182	0	0	6.10184	0	0.82534	3.52322	3.36602	0	0	0.939936	0	5.96717	0	0	0	0.564673	4.9569	2.70025	4.05504	3.11394	0	0	0	0	2.06167	0	7.03291	3.23354	0	0	0.997808	0	0	0	2.23769	0	0	3.0276	2.88164	0
B12	naive	G1	1	3.19793	8.28495	0	6.90855	0	2.25127	0	0	0	0	0.814087	6.79408	1.01152	0	0	0.927566	4.11252	8.24465	0	0	3.63716	1.74526	0	0	2.48623	4.30758	0	0	2.62731	0	1.02811	1.26627	5.47842	0	5.01765	0	0	5.24037	0	0	1.77965	0	4.08987	0	1.25718	0
B19	naive	G1	1	0	4.99662	0	6.98044	5.33136	0	7.74632	0	0	0	1.63767	3.94086	4.60559	0	0	1.81244	0	7.60956	0	0	0	0	5.61362	0	0	0	0	0	0	5.8531	2.7633	0	5.84189	0	5.88972	0	0	1.83285	0	0	1.42993	0	0	0	4.27742	0
B22	naive	G1	1	0	7.56785	0	0	2.26668	3.08038	0	0	0	0	0	0	2.17824	0	1.94155	2.67051	3.55743	6.97168	2.07824	0	2.25753	0	0	1.22579	0.816138	0	0	0	5.3042	6.2199	0	0	7.36278	0	0	0	0	2.69454	0	0	0	0	0	0	0	0
C20	naive	G2	1	4.82509	0	0	0	6.00233	0	4.02475	0	8.10578	0	0	0	0	0	0	0	0	7.42355	0	0	0	4.76699	0	0	0	6.54813	0	0	0	0	0	0	7.53993	0	0	0	0	0	0	0	0	0	0	0	0	0
E1	naive	G3	1	7.02601	0	0	2.6648	0	0	0	0	5.51164	0	0	0	0	0	0	0	0	7.85107	0	0	0	3.36496	0	0	0	0	0	0	0	9.17844	0	0	0	0	0	0	0	3.71448	0	0	0	0	0	0	0	0
H8	naive	G4	1	5.73524	3.13755	0	0	3.38586	0	0	0	0	0	1.51812	0	3.99901	0	3.53209	0	0	0	3.16865	0	0	0	3.33248	0	0	0	0	0	0	0	0	2.98386	8.84628	0	0	0	0	7.61135	4.55581	0	0	0	0	0	0	6.43468
H24	naive	G4	1	2.59333	6.62466	3.46135	0	0	0	0	0	4.73247	0	0	0	0.833559	0	0	0	0	6.38093	0	6.38852	0	1.292	0	4.13993	0	0	0	3.43009	3.16551	8.37552	2.5361	0	5.29792	4.07785	0	0	1.32621	0	0	0	3.61336	6.47904	5.91219	0	2.4007	0
L11	blood	G1	2	5.14338	6.29888	4.01616	5.39693	4.9498	0	3.94386	6.66539	5.46233	0	0	4.52694	4.29801	0	0.87643	0	3.77369	5.98653	2.26078	3.29978	0	0.866677	2.40753	0	1.22816	0	0	0	2.00762	5.31977	0	0	7.17465	0	0	0	2.74682	3.5527	0	0	3.92563	0	0	0	1.14834	1.18139
M1	blood	G2	2	0	5.81509	0	1.64115	0	2.09695	0	0	0	0	0	0	0	0	0	0	5.73022	6.24779	0	4.33821	0	1.95256	0	0	3.77658	0	0	0	0	0	0	0	1.8927	0	0	0	3.25314	4.4495	0	0	0	0	0	0	0	0
M13	blood	G2	2	0	8.09652	0	5.16328	0	0	0	7.02903	2.69453	0	0	0	3.29046	0	0	0	0	0	0	0	0	1.92196	0	0	0	0	0	0	4.98649	0	0	0	7.20072	0	0	0	0	0	0	6.6957	4.8099	0	0	0	0	0
M17	blood	G2	2	0	7.80255	3.69147	7.12815	0	0	0	0	3.69388	0	0	0	0	0	0	0	0	7.75856	0	0	0	0	0	0	0	0	0	0	4.45492	0	2.59479	0	5.58418	0	1.52597	0	0	0	0	5.80461	3.43768	0	0	0	0	0
M18	blood	G2	2	0	4.81166	0	7.42576	0	0	0	0	6.64701	0	0	0	1.33954	0	0	0	0	6.99008	0	0	0	0	3.52374	0	4.36797	0	0	0	0	0	0	0	9.19782	0	0	0	0	6.24505	0	0	0	0	0	0	0	0
N19	blood	G2	2	2.46288	8.10126	4.6575	6.05368	0	4.60615	0	4.49903	4.41849	0	0	0	2.47423	1.12435	0	0	0	5.9904	1.6972	3.83977	1.2115	1.71038	1.82626	0	2.2343	0	0	0	2.66898	0	0.779995	0	7.28217	0	0	0	1.23341	0	0	4.15927	1.42169	0	0	0	0	0
N21	blood	G2	2	4.18363	7.34	0	5.61094	0	0	0	2.97316	2.54781	0	0	0	0	0	0	0.479941	0	0	0	0	0	2.03139	2.0804	0.669746	3.331	0	0	0	0	0	2.69088	0	5.29051	0	0	0	0	3.7951	0	0	0	2.58826	0	0	0	0
O6	blood	G3	2	0	6.57666	0	7.3564	0	0	0	0	0	0	0	0	0	0	0	0	0	5.37106	0	0	0	0	0	0	0	0	0	0	0	0	0	0	4.99519	0	0	0	0	0	0	0	0	0	0	0	0	0
P15	blood	G3	2	2.99973	7.91207	0	5.41354	3.05536	7.0198	0	0	5.02723	0	0	0	1.66637	0	0	0	0	0	0	0	0	0	0	0	2.427	0	0	0	0	0	0	0	5.76266	0	2.57921	0	0	0	0	0	1.45192	0	0	0	0	0
P20	blood	G3	2	5.96071	8.28372	0	7.26526	0	0	0	0	0	0	0	0	0	0	0	0	0	7.56488	0	0	0	0.649636	0	0	2.71467	0	0	0	0	0	0	0	5.12387	0	5.9077	0	0	0	0	0	0	0	0	0	0	0
D9	naive	G2	2	0	8.22077	0	0	0	0	0	0	0	0	0	0	0.298672	0	0	0	0	0	0	0	0	0	1.41728	0	0	0	0	0	0	0	3.96237	0	5.23445	0	0	0	0	5.32757	0	5.50062	0	0	0	0	0	0
F11	naive	G3	2	4.7657	6.54759	6.22436	7.92925	0	0	0	0	0	0	0	0	0	0	0	0	0	0	0	0	0	0	0	0	0	0	0	0	5.21613	0	0	0	0	0	0	0	0	0	0	0	4.61444	0	0	0	0	0
G18	naive	G3	2	4.57866	7.14449	0	8.63239	0	0	0	0	0	0	0	0	0	0	0	0	0	7.85289	0	5.86944	0	0	0	0	4.64273	0	0	0	0	0	3.4793	0	5.82653	0	0	0	0	0.677291	0	6.813	3.02343	0	0	0	0	0
F21	naive	G3	2	0	8.23224	0	0	0	0	0	0	0	0	0	0	0	0	0	0	0	0	0	0	0	1.32879	0	0	0	0	0	0	6.36705	0	0	0	8.3179	0	3.96083	0	0	0	0	0	0.476095	1.50645	0	0	0	5.3753
F22	naive	G3	2	2.32644	8.46299	6.87793	6.45243	0	0	0	3.78867	0	0	0	0	0	2.56066	0	0	0	6.5876	0	0	0	0	0	0	4.94621	0	0	0	0	0	0	0	7.67846	0	1.27955	0	0	0	0	0	1.31841	0	0	0	1.58088	0
G22	naive	G3	2	3.68799	7.65313	6.02721	0	5.4644	0	0	0	3.62109	0	0	0	1.23919	0	0	0	0	6.69105	0	0	0	0.782507	1.27023	0	0	0	0	0	3.68809	0	2.52913	0	7.25054	0	2.66419	0	0.806798	2.38526	0	0	2.49965	0	0	0	0	0
I7	naive	G4	2	5.093	8.66996	0	6.99626	0	0	0	6.04791	0	6.62019	0	0	0	0	0	0	0	7.56571	0	0	0	0	5.45031	0	0	0	0	0	0	0	3.78501	0	6.61262	0	1.8172	0	0	0	0	0	3.73609	0	0	0	1.81349	0
H9	naive	G4	2	0	7.03318	0	0	0	0	0	0	0	0	0	0	0	0	0	0	0	7.02041	0	0	0	0.34654	0	0	3.48313	0	0	0	0	0	0	2.0854	8.10773	0	0	0	4.16601	0	0	6.16058	0	0	0	0	0	0
H14	naive	G4	2	0	6.35462	0	0	3.8619	0	0	0	0	0	0	0	0	0	0	0	0	5.68877	0	2.40167	0	0	0	0	3.33036	0	0	0	0	0	0	0	6.66677	0	0	0	0	0	0	0	0	0	0	0	0	0
I14	naive	G4	2	0	7.61958	5.26767	2.08287	0	5.52537	0	0	0	0	0	0	0	0	0	1.58557	0	0	0	5.28278	0	0	2.69109	0	2.83335	0	0	0	0	0	0	0	7.90667	0	0	0	0	0	0	0	2.5506	0	0	0	0	0
I24	naive	G4	2	5.94344	7.27227	5.32798	0	0	0	0	0	4.35975	0	0	0	0.271035	0	0	0	0	5.24398	0	1.0853	0	3.57418	2.90796	1.40489	1.80606	0	0	0	1.03803	1.3269	2.79071	0	7.02436	0	0	0	3.28745	0	0	0	4.1562	0	1.20423	0	0	0
G21	naive	G3	3	7.81477	0	0	5.65575	0.636139	0	0	0	8.93796	0	0	0	0	0	0	0	0	7.20761	0	7.05265	0	0	0	0	0	0	0	0	1.08384	0	0	0	0	0	0	0	0	0	0	0	0	0	0	0	0	0
D8	naive	G2	3	2.93947	0	0	8.64771	0	0	0	0	6.55316	0	0	0	0	0	0	0	0	0	0	0	0	0	1.41833	0	0	0	0	0	0	0	0	0	6.6201	0	0	0	0	0	0	0	0	0	0	0	0	0
C15	naive	G2	3	0	9.22332	7.09301	8.65063	5.31846	0	0	0	5.71856	0	0	0	0	0	0	0	0	0	1.55324	0	0	0	0	0	0	0	0	0	0	0	1.51398	0	2.71346	0	1.62119	0	0	0	0	0	0	0	0	0	0	0
C23	naive	G2	3	5.46106	9.28517	0	0	0	8.49702	0	8.33589	0	0	0	0	0	0	0	0	0	0	0	0	5.13612	0	0	0	0	0	0	0	0	0	0	0	4.88049	0	0	0	0	0	0	0	0	0	2.17514	0	0	0
G2	naive	G3	3	0	7.24515	0	0	0	0	0	0	0	0	0	0	0	0	0	0	0	0	0	0	0	0	0	0	0	0	0	0	5.70052	0	0	0	9.76832	0	0	0	0	0	0	0	0	0	0	0	0	0
F3	naive	G3	3	0	7.12326	0	0	0	8.25763	0	0	0	0	0	0	0	0	0	0	0	0	0	0	0	0	0	0	0.893963	0	0	0	6.48144	0	0	0	6.7677	0	0	0	0	0	0	0	0	0	0	0	0	0
F5	naive	G3	3	6.26899	8.70491	0	0	0	0	0	0	0	0	0	0	0	0	0	0	0	0	0	0	0	3.90447	0	0	5.27616	0	0	0	4.89226	0	0.546714	0	8.42891	0	0	0	0	0	0	0	0	0	0	6.82201	0	0
F6	naive	G3	3	0	8.83167	0	0	0	0	0	0	0	0	0	0	0	0	0	0	0	7.02232	0	0	0	2.09168	0	1.6232	3.01662	0	0	0	6.47211	0	0	1.05849	3.03477	0	0	0	0	0	0	0	3.61455	0	0	0	0	0
E7	naive	G3	3	0	7.47809	0	7.29242	0	0	0	0	0	0	0	0	1.82332	0	0	0	0	7.89921	0	0	1.84773	0	2.45182	0	0	0	0	0	0	0	2.73697	0	8.04482	0	0	0	0	2.37299	0	0	2.28381	0	0	0	0	0
G8	naive	G3	3	0	8.11626	0	0	0	0	0	0	1.48961	0	0	0	0	0	0	0	0	4.9356	0	0	0	3.28598	0	0	0	0	0	0	0	0	0	0	7.76444	0	0	0	0	2.20279	0	0	0	0	0	0	0	0
G9	naive	G3	3	5.30697	8.54316	7.74177	0	0	0	0	0	0	0	0	0	0	0	0	0	0	0	0	0	0	0	0	0	0	0	0	0	0	0	0	0	7.62937	0	0	0	0	0	0	8.63911	0	0	0	0	0	0
G10	naive	G3	3	4.87179	0	0	0	0	0	0	0	0	0	0	0	0	0	0	0	0	7.50113	0	0	0	0	0	0	3.93813	0	0	0	6.91893	0	0	0	6.90009	0	0	0	5.63713	0	0	0	0	0	0	4.17092	0	0
G13	naive	G3	3	0	8.02174	0	0	6.72944	0	0	0	0	0	0	0	0	0	0	0	0	9.34272	0	0	0	0	0	0	0	0	0	0	6.14403	0	0	0	0	0	0	0	0	5.54638	0	0	0	0	0	0	0	0
G14	naive	G3	3	0	0	0.849802	0	0	0	0	0	7.83022	0	0	0	0	0	0	0	0	7.94369	0	0	0	1.29315	0	0	2.39438	0	0	0	0	0	3.4078	0	0	0	0	0	0	0	0	0	0	0	0	0	0	0
E15	naive	G3	3	6.71096	0	0	0	0	0	0	0	0	0	0	0	4.91525	0	0	0	0	8.84405	0	0	0	0	0	0	0	0	0	0	0	0	0	0	4.70065	0	0	0	0	0	0	0	0	0	0	0	0	0
E16	naive	G3	3	7.56849	0	0	8.21474	0	0	0	0	5.38466	0	0	0	0	0	0	0	0	8.58483	0	0	0	5.57318	0	0	0	0	0	0	0	0	0	0	1.56766	0	2.43346	0	0	0	0	0	0	0	0	0	0	0
E18	naive	G3	3	0	8.92774	0	0	0	0	0	0	5.90404	0	0	0	0	0	0	0	0	0	0	6.07425	3.69196	0	0	0	3.40515	0	0	0	0	0	0	0	0	0	0	0	0	0	0	0	0	0	0	0	0	0
F19	naive	G3	3	5.87487	0	0	0	0	6.07325	0	0	0	0	0	0	0.377029	0	0	0	0	0	0	0	0	3.62541	0	6.56486	0	0	0	0	0	0	0	0	7.99659	0	0	0	0	0	0	0	0	0	0	1.61616	0	0
F20	naive	G3	3	0	7.39417	0	0	0	0	0	0	0	0	0	0	0	0	0	0	0	8.02741	0	0	0	0	0	0	0	0	0	0	0	0	0	0	0	0	0	0	0	0	0	0	0	0	0	0	0	0
F23	naive	G3	3	0	0	7.41623	0	0	0	0	0	0	0	0	0	0	0	0	0	0	6.19397	0	0	0	0	0	0	0	0	0	0	0	0	0	0	8.38716	0	0	0	0	0	0	0	0	0	0	0	0	0
G24	naive	G3	3	6.2886	3.78458	0	8.07504	0	0	0	0	0.614803	0	0	0	0	0	0	0	0	8.9489	0	0	0	3.16804	0	0	0	0	0	0	8.26673	0	0.676421	0	1.88262	0	0	0	0	0	0	0	0	0	0	0	0	0
I10	naive	G4	3	0	0	0	0	0	0	0	0	0	0	0	0	5.87236	0	0	0	0	7.86327	0	0	0	1.31114	0	3.44885	0	0	0	0	0	0	0	0	2.09326	0	0	0	0	4.47524	0	0	0	0	0	0	0	0
H11	naive	G4	3	0	9.07734	0	1.11813	0	0	0	0	0	0	0	0	0	0	0	0	0	0	0	0	0	4.05582	4.03551	6.38484	0.798059	0	0	0	0	0	0	0	6.38263	0	0	0	0	0	0	0	0	0	0	0	0	0
J13	naive	G4	3	5.95163	7.48579	0	0	0	0	0	0	0	0	0	0	0	0	0	0	0	1.7309	0	0	0	0.20967	0	0	0	0	0	0	0	0	0	0	7.02646	0	0	0	0	0	0	0	0.49006	0	0	0	0	0
J17	naive	G4	3	1.45539	8.73392	0	0	0	0	0	0	0	0	0	0	0	0	0	0	0	0	0	0	0	0	0	5.8356	0	0	0	0	0	0	1.07545	3.39003	8.06908	0	0	0	0	0	0	0	4.79655	0	0	0	0	0
I18	naive	G4	3	5.37837	8.42233	0	0	0	8.16328	0	0	0	0	0	0	0	0	0	0	0	0	0	0	0	0	0	0	0	0	0	0	0	0	3.12136	0	6.15707	0	0	0	0	0	0	0	0	0	0	0	0	0
H22	naive	G4	3	0	4.83029	0	7.89915	0	0	0	0	2.88567	0	0	0	0	0	0	0	0	1.59074	0	0	0	0	0	0	0	0	0	0	0	0	0	0	1.88498	0	0	0	0	0	0	0	0	0	0	0	0	0
H23	naive	G4	3	0	5.89468	0	7.572	0	0	0	0	3.62628	0	0	0	0	0	0	0	0	8.38581	0	0	0	0	3.23269	0	0	0	0	0	0	0	0	0	8.45849	0	0	0	0	6.7183	0	0	0	0	0	0	0	0
O4	blood	G3	4	0	8.67575	4.39296	0	0.62993	0	0	0	3.27458	0	0	0	0	0	0	0	0	7.37427	0	0	0	0	0	0	4.00685	0	0	0	3.12818	0	0	0	7.17623	0	0	0	0	0	0	0	0	0	0	0	0	0
O8	blood	G3	4	0	7.21263	0	0	0	0	0	5.04821	7.51244	0	0	0	4.35252	0	0	0	0	0	0	0	0	0	0	0	0	0	0	0	0	0	0	0	8.13767	0	0	0	0	0	0	0	0	0	0	0	0	0
P10	blood	G3	4	0.999427	6.22231	0	5.07401	0	0	0	0	5.6941	0	0	0	4.63818	0	0	0	7.71512	0	0	0	7.00014	0.364568	4.9917	0	3.72117	0	0	0	0	0	0	0	7.57907	0	0	0	2.92247	0	0	6.7556	2.94318	0	0	0	0	0
P11	blood	G3	4	0	0	0	8.05988	0	0	0	5.47295	0	0	0	0	1.87184	0	0	0	0	0	0	0	0	0.659621	0	0	5.00857	0	0	0	5.72354	0	0	0	0	0	0	0	4.54335	0	0	0	0	0	0	0	0	0
P13	blood	G3	4	0	0	0	0	0	0	0	0	0	0	0	0	0	0	0	0	0	6.92433	0	0	0	0	0	0	0	0	0	0	5.51444	0	0	0	7.44842	0	0	0	0	0	0	0	0	0	0	0	2.48966	0
O21	blood	G3	4	0	8.89478	0	6.29509	0	0	0	0	0	0	0	0	0	0	0	0	0	0	0	0	0	0	0	0	0	0	0	0	0	0	0	0	0	0	0	0	0	0	0	0	0	0	0	0	0	0
I8	naive	G4	4	0	7.81957	0	0	0	0	0	0	0	0	0	0	0	0	0	0	0	0	0	0	0	4.20356	0	0	0	0	0	0	0	0	0	0	0	0	0	0	5.63504	4.35542	0	0	0	0	0	0	0	0
E4	naive	G3	4	5.25756	7.44154	0	1.76906	4.23049	0	2.68465	0	0	0	0	0	0	0	0	0	0	0	0	0	0	3.30084	2.82621	1.22494	4.26587	0	0	0	0	0	3.49761	0	6.54699	0	4.19184	0	0	0	0	5.74053	0	0	0	0	0	1.65665
G5	naive	G3	4	0	4.98992	0	4.99815	0	0	0	0	0	0	3.06271	0	0	0	0	0	0	1.26904	0	0	0	0	0	0	0	0	0	0	0	0	0	0	4.77746	0	0	0	0	0	0	0	0	0	0	0	0	0
E10	naive	G3	4	0	0	0	7.8328	0	0	0	0	0	0	0	0	0	0	0	0	0	0	0	0	1.61831	0	0	0	3.51224	0	0	0	0	0	1.70333	0	5.95019	0	0	0	0	0	0	5.56807	1.86456	0	0	0	0	0
D23	naive	G2	4	0	8.12553	0	0	6.15744	3.64093	7.00576	0	0	0	4.44749	0	5.39483	0	0	0	0	6.23833	2.57494	0	1.29546	2.96691	0	0	4.16748	1.28339	0	0	4.23074	0	3.39411	0	8.47083	0	0	0	0	0	0	0	0	0	0	0	2.65583	3.83412
D5	naive	G2	4	6.61884	3.40992	0	0	0	0	0	0	8.04048	0	0	0	0	0	0	0	0	4.93754	0	0	0	3.60156	0	0	0	0	0	0	0	0	2.25867	0	5.70106	0	0	0	0	0	0	0	0	0	0	0	0	0
C10	naive	G2	4	0	8.47491	0	8.65026	0	0	0	0	0	0	0	0	0	0	0	0	0	9.58035	0	0	0	0	0	0	0	0	0	0	0	0	0	0	7.60992	0	0	0	5.10536	0	0	0	0	0	0	0	0	0
D13	naive	G2	4	0	7.95657	7.03667	7.90275	6.53531	0	0	0	6.13435	0	0	0	4.14322	0	0	0	0	0	0	0	0	0	0	0	0	0	0	0	0	0	0	0	3.83455	0	0	0	0	0	0	0	0	0	0	0	0	0
D16	naive	G2	4	0	8.30659	0	0	0	0	0	0	0	0	0	0	1.00778	0	0	0	0	0	0	0	0	2.98691	0	0	4.9646	0	0	0	0	0	2.5761	0	0	0	0	0	5.38938	0	0	0	0	0	0	0	0	0
D21	naive	G2	4	0	7.02873	6.5087	0	0	0	0	0	0	0	0	0	0	0	0	0	0	0	0	0	0	2.54964	0	5.11563	0	0	0	0	5.64336	2.5318	3.02673	0	7.87787	0	0	0	2.8708	0	0	0	0	0	0	0	0.676017	0
F1	naive	G3	4	0	4.94661	0	0	0	0	0	0	0	0	0	0	0	0	0	0	0	0	0	0	0	5.22059	0	0	0	0	0	0	0	0	0	0	6.65174	0	0	0	0	0	0	0	0	0	0	0	1.20638	0
G3	naive	G3	4	0	0	0	7.98404	0	0	0	0	0	0	0	0	0.30601	0	0	0	0	3.91273	0	0	0	1.85841	0	0	0	0	0	0	0	0	3.04461	0	2.76377	0	5.31968	0	0	0	0	0	0	0	0	0	0	0
F4	naive	G3	4	0	7.49873	0	0	0	0	0	0	0	0	0	0	0	0	0	0	0	0	0	0	0	5.06497	0	0	0.462802	0	0	0	0	0	0	0	0	0	0	0	0	0	0	0	0	0	0	0	0	0
E5	naive	G3	4	0	4.6224	0	5.54444	0	0	0	0	5.69572	0	0	0	0	0	0	0	0	0	0	0	0	0	0	3.34812	0	0	0	0	0	0	0	0	7.0451	0	0	0	0	0	0	6.0656	0	0	0	0	0	0
G6	naive	G3	4	6.00767	0	0	0	0	1.99026	0	0	7.07989	0	0	0	0	0	0	0	0	5.01125	0	0	0	3.25618	0.979936	0	0	0	0	0	0	0	0	0	8.24644	0	0	0	0	0	0	0	0	0	0	0	0	0
G7	naive	G3	4	5.86503	0	0	0	0	0	0	0	0	0	0	0	0	0	0	0	0	0	0	0	0	0	0	0	0	0	0	0	0	0	0	0	0	0	0	0	0	0	0	0	0	0	0	0	0	0
E9	naive	G3	4	0	7.28235	0	7.53334	0	0	0	0	0	0	0	0	0	0	0	0	0	3.98076	0	0	0	0	0	0	0	0	0	0	0	0	0	0	5.99298	0	0	0	0	0	0	6.82372	0	0	0	0	0	0
F10	naive	G3	4	0	5.07477	0	5.15796	7.28041	5.99157	0	0	0	0	0	0	3.75355	6.86134	0	0	0	0	0	0	0	0	0	0	0	0	0	0	0	0	0	0	5.24894	0	0	0	0	0	0	0	0	0	0	0	0	0
E11	naive	G3	4	0.654341	8.03083	0	0	0	0	0	0	0	0	0	0	0	0	0	0	0	7.0925	0	0	0	3.68806	0	6.11349	0	0	0	0	6.38707	0	0	0	7.00927	0	0	0	0	0	0	0	0	0	0	5.81985	3.55264	0
G11	naive	G3	4	0	7.86146	0	1.08144	0	0	0	0	0	0	0	0	0	0	0	0	0	0	0	1.18006	0	0	0	0	0	0	0	0	0	0	0	0	6.59617	0	0	0	0	0	0	0	1.41988	0	0	0	0	0
E13	naive	G3	4	0	7.93233	0	6.25951	0	8.07775	0	0	5.80899	0	0	0	0	0	0	0	0	7.78743	0	0	3.53123	0	0	0	0	0	0	0	5.86693	0	0	0	5.48427	0	0	0	0	0	0	0	0	0	0	0	0	0
F13	naive	G3	4	5.03969	4.17538	0	2.09433	0	3.10232	5.76685	7.84603	0	0	0	0	0	0	0	0	0	6.54335	0	0	0	0	0	0	0	0	0	0	0	0	0	0	6.75184	0	0	0	2.64803	0	0	0	0	0	0	0	0	0
F15	naive	G3	4	0	7.60309	0	8.03093	0	0	0	0	0	0	0	0	2.92034	0	0	0	0	0	0	0	0	0	0	0	0	0	0	0	6.1851	0	0.970965	0	6.06919	0	0	0	0	0	0	0	1.08678	0	0	0	0	0
G16	naive	G3	4	0	0	0	7.34629	0	7.29641	0	0	6.51414	0	0	0	0	0	0	0	0	8.15202	0	0	0	0	0	0	5.07203	0	0	0	0	0	0	0	8.26148	0	1.12285	0	0	0	0	0	4.05406	0	0	0	0	0
E17	naive	G3	4	0	8.54572	0	0	0	0	0	0	0	0	0	0	0	0	4.27286	0	0	0	0	0	0	1.40153	0	0	0	0	0	0	0	0	0	0	8.48975	0	0	0	0	0	0	0	1.64285	0	0	0	0	0
F17	naive	G3	4	0	8.07672	1.76472	8.0025	0	0	0	0	0	0	0	0	0	0	0	0	0	0	0	0	0	2.82184	5.30537	0	0	0	0	0	0	0	0	0	6.62271	0	0	0	0	6.36454	0	4.55642	0	0	0	0	0	0
F18	naive	G3	4	5.15917	7.06006	0	0	4.43627	0	0	0	6.10053	0	5.31726	0	0.456356	0	0	0	0	6.59063	0	0	0	0	0	0	0	0	0	0	0	0	0	0	7.05789	0	5.47349	0	0	0	0	0	0	0	0	0	0	0
E22	naive	G3	4	0	7.52811	5.88139	0	0	0	0	0	7.5901	0	0	0	0	0	0	0.70728	0	6.94643	0	0	0	0	0	0	4.09959	0	0	0	0	0	0	0	4.51321	0	1.15273	0	0	0	0	0	0	0	0	0	0.314744	0
E23	naive	G3	4	4.19994	8.801	0	0	0	0	0	0	8.17721	0	0	0	0	0	0	0	0	0	0	0	0	0	0	0	3.31734	0	0	0	0	0	4.52925	0	6.8472	0	0	0	0	0	0	0	0	0	0	0	0	0
G23	naive	G3	4	0	0	4.27515	6.67679	0	0	0	0	0	0	0	0	2.61381	0	0	0	0	0	0	0	0	0	0	0	0	0	0	0	2.63705	0	2.37601	0	4.92077	0	0	0	2.79131	5.69214	0	0	0	0	0	0	0	0
F24	naive	G3	4	6.70845	0	0	5.4919	0	0	0	0	0	0	0	0	2.0231	0	0	0	0	8.29598	0	0	0	0.960585	0	0	0	0	0	0	0	0	0	0	6.61509	0	0	0	0	0	0	0	0	0	0	0	0	0
H1	naive	G4	4	4.55669	6.56065	3.89278	3.10681	0	0	0	0	0	0	0	0	0	0	0	0	0	0	0	0	0	0	0	2.60279	0	0	0	0	0	0	3.66884	0	3.13745	0	2.42487	0	0.690042	0	0	0	0	0	0	0	0	0
J1	naive	G4	4	0	3.82282	0	8.54658	2.77478	0	0	0	0	0	0	0	0	0	0	0	0	0	0	0	0	2.69179	0	0	4.74199	0	0	0	0	0	0	0	7.68778	0	0	0	0	0	0	0	0	0	0	0	0	0
I4	naive	G4	4	0	7.39436	0	0	0	0	0	3.86879	4.84856	0	0	0	0	0	0	0	0	6.35451	0	1.37706	0	0	0	0	0	0	0	0	0	0	0	0	5.58158	0	0	0	0	0	0	0	0	0	0	0	0	0
I6	naive	G4	4	0	8.02946	1.18317	0	0	0	0	0	0	0	0	0	0	0	0	0	0	0	0	0	2.24037	0	0	0	0	0	0	0	0	0	0	0	0	0	0	0	0	0	0	0	0	0	0	0	0	0
J6	naive	G4	4	0	9.1438	0	7.32285	0	0	0	0	0	0	0	0	0	0	0	0	0	0	0	4.10767	0	0.692224	0	0	3.5903	0	4.67006	0	0	0	2.34504	0	7.51018	0	0	0	0	3.70497	0	0	0	0	0	0	0	0
J7	naive	G4	4	5.09235	7.54667	0	0	0	0	0	0	0	0	0	0	0	0	0	0	0	5.85813	0	0	0	6.70466	0	0	0	0	0	0	0	0	0	0	7.29411	0	0	0	1.03114	0	0	0	0	0	0	0	0	0
J9	naive	G4	4	0	9.54107	0	0	3.94058	0	0	0	0	0	0	0	0	0	0	0	0	0	0	0	0	0.410748	0	0	0	0	0	0	0	0	0	0	3.81513	0	0	0	0	0	0	0	0	0	0	0	0	0
I16	naive	G4	4	0	7.14171	0	0	0	0	0	0	0	0	0	0	0	0	0	0	0	0	0	1.80205	0	0	0	0	3.69979	0	0	0	0	0	0	0	8.47842	0	0	0	0	0	0	0	3.62528	0	0	0	0	0
H18	naive	G4	4	6.29487	1.25845	0	6.20094	0	0	0	0	7.08247	0	0	0	0	0	0	1.12944	7.01964	0	0	0	0	0	0	0	0	0	0	0	0	0	0	0	7.83167	0	0	0	0	0	0	0	0	0	0	0	2.31215	0
J23	naive	G4	4	0	6.21253	0	8.01027	0	0	0	0	5.1432	0	0	0	0	0	0	0	0	0	0	0	0	0	0	0	3.56597	0	0	0	0	0	0	0	5.15931	0	0	0	0	0	0	0	0	0	0	0	0	0
N11	blood	G2	5	0	0	0	7.51067	0	0	0	0	0	0	0	0	1.05845	0	0	0	0	0	0	0	0	1.00198	0	0	0	0	0	0	0	0	0	4.80512	0	0	0	3.21034	0	0	0	0	3.80378	0	0	0	0	0
L8	blood	G1	5	0	0	0	0	0	0	0	0	0	0	0	0	0	0	0	0	0	0	0	0	0	0	0	0	0	1.23723	0	0	0	0	0	2.82535	0	0	0	0	0	5.68599	0	0	2.64859	0	0	0	0	0
L16	blood	G1	5	2.33079	0	0	8.18819	0	0	6.41688	0	0	0	0	0	1.17135	0	0	0	0	0	0	0	0	2.16327	0	0	0	0	0	0	0	0	0	0	2.27403	0	0	0	0	1.70833	0	0	2.45907	0	0	7.25321	0	0
K20	blood	G1	5	0	0	0	0	0	0	4.53792	0	0	0	0	0	0	0	0	0	0	0	0	0	0	0	0	0	0	0	0	0	0	0	0	0	0	0	0	0	0	0	0	0	0	0	0	0	0	0
M6	blood	G2	5	4.75112	0	0	0	0	3.99178	7.3572	0	0	0	0	0	0	0	0	0	0	0	0	0	0	0	0	0	0	0	0	0	0	0	0	0	0	0	0	0	0	0	0	0	0	0	0	0	0	0
N13	blood	G2	5	1.61778	0	0	0	0	0	0	0	0	0	0	0	0	0	0	0	0	0	0	0	0	1.75755	0	0	0	0	0	0	0	0	0	0	0	0	0	0	0	0	0	0	0	0	0	0	0	0
N14	blood	G2	5	6.73374	0	0	0	0	0	0	0	0	0	0	0	0	0	0	0	0	0	0	0	0	0	0	0	0	0	0	0	0	0	0	0	4.39714	0	0	0	0	0	0	0	0	0	0	0	0	0
N20	blood	G2	5	0	0	0	0	0	0	0	0	0	0	0	0	0.49027	0	0	0	0	0	0	0	0	0.459251	0	0	0	0	0	0	0	0	0	0	0	0	0	0	0	1.97518	0	0	0	0	0	0	0	0
N23	blood	G2	5	0	0	0	0	0	0	0	0	0	0	2.2748	0	0	0	0	0	0	0	0	0	0	0	0	0	0	0	0	0	0	0	0	0	0	0	0	0	0	0	0	0	0	0	0	0	0	0
P18	blood	G3	5	0	0	0	0	0	0	0	0	0	0	0	0	0	0	0	0	0	0	0	0	0	0	0	0	0	0	0	0	0	0	0	0	0	0	0	0	0	0	0	0	0	0	0	0	0	0
P19	blood	G3	5	0	0	0	0	0	0	0	0	0	0	0	0	0	0	0	0	0	0	0	0	0	0	0	0	0	0	0	0	0	0	0	0	0	0	0	0	0	0	0	0	0	0	0	0	0	0
O22	blood	G3	5	0	0	0	0	0	0	0	0	0	0	0	0	0	0	1.75669	0	0	0	0	0	0	0	0	0	0	0	0	0	0	0	0	0	0	0	0	0	0	0	0	0	0	0	0	0	0	0
P22	blood	G3	5	0	0	0	0	0	0	0	0	0	0	0	0	0	0	0	0	0	0	0	0	0	0	0	0	0	0	0	0	0	0	0	0	0	0	0	0	0	0	0	0	0	0	0	0	0	0
O23	blood	G3	5	0	0	0	0	0	0	0	0	0	0	0	0	0	0	0	0	0	0	0	0	0	0	0	0	0	0	0	0	0	0	0	0	0	0	0	0	0	0	0	0	0	0	0	0	0	0
I2	naive	G4	5	0	0	0	0	0	0	0	0	0	0	0	0	0	0	0	0	0	0	0	0	0	0	0	0	0	0	0	0	0	0	0	0	0	0	0	0	0	0	0	0	0	0	0	0	0	0
F14	naive	G3	5	2.84725	4.64627	0	0	7.87091	0	0	0	9.49516	0	0	0	6.68681	0	0	0	0	0	0	0	0	1.47655	2.50105	0	0	0	0	0	0	0	0	0	0	0	0	0	0	0	0	0	3.89053	0	0	0	3.52806	0
A24	naive	G1	5	0	0	0	0	0	0	0	0	0	0	0	0	0	0	0	0	0	0	0	0	0	0	0	0	0	0	0	0	0	0	0	0	0	0	0	0	0	0	0	0	0	0	0	0	0	0
C3	naive	G2	5	0	0	0	0	0	0	0	0	0	0	0	0	0	0	0	0	0	0	0	0	0	3.97476	0	0	0	0	0	0	0	0	2.34063	0	0	0	3.87218	0	0	0	0	0	0	0	0	0	0	0
C4	naive	G2	5	0	0	0	0	0	0	0	0	8.173	0	0	0	0	0	0	0	0	0	0	0	6.23382	0	0	0	0	0	0	0	0	0	0	0	0	0	0	0	0	0	0	0	0	0	0	0	0	0
D4	naive	G2	5	0	0	0	0	0	0	0	0	0	0	0	0	0	0	6.42706	0	0	0	0	0	0	0	0	0	0	0	0	0	0	0	0	0	0	0	0	0	0	0	0	0	0	0	0	0	0	0
C5	naive	G2	5	0	3.22718	0	0	0	0	0	0	0	0	0	0	6.66471	0	7.3188	0	0	0	0	0	0	0	0	0	0	0	0	0	0	0	2.69613	0	0	0	0	0	0	0	0	0	0	0	0	0	0	0
C7	naive	G2	5	0	0	0	0	0	0	0	0	0	0	0	0	0	0	0	0	0	0	0	0	0	0	0	0	0	0	0	0	0	0	0	0	0	0	0	0	0	0	0	0	0	0	0	0	0	0
C13	naive	G2	5	0	0	0	0	0	0	0	0	0	0	0	0	1.39733	0	0	0	0	0	0	0	0	6.1726	0	0	0	0	0	0	0	0	0	0	0	0	0	0	0	0	0	0	0	0	0	0	0	0
C19	naive	G2	5	0	6.79003	0	0	0	0	0	0	0	0	0	0	0	0	0	0	0	0	0	0	0	0	0	0	0	0	0	0	3.27232	0	0	0	0	0	0	0	0	3.73453	0	0	3.72361	0	0	0	0	0
C24	naive	G2	5	0	0	0	0	0	0	0	0	0	0	0	0	0	0	0	0	0	0	0	0	0	0	0	0	0	0	0	0	0	0	0	0	3.90557	0	0	0	0	0	0	0	0	0	0	0	0	0
E6	naive	G3	5	0	0	0	0	0	0	0	0	0	0	0	0	0	0	0	0	0	0	0	0	0	2.13729	0	0	0	0	0	0	0	0	0	0	0	0	0	0	0	0	0	0	0	0	0	0	0	0
H4	naive	G4	5	0	0	0	0	0	0	0	0	0	0	0	0	0	0	0	0	0	0	0	0	0	0	0	0	0	0	0	0	0	0	0	0	0	0	0	0	0	0	0	0	0	0	0	0	0	0
H6	naive	G4	5	0	0	0	0	0	0	0	0	0	0	0	0	0	0	0	0	0	0	0	0	0	0	0	0	0	0	0	0	0	0	0	0	0	0	0	0	5.3925	0	0	0	0	0	0	0	0	0
H10	naive	G4	5	0	0	2.49904	0	0	0	0	0	0	0	0	0	0	0	0	0	0	0	0	0	0	0	0	0	0	0	0	0	0	0	0	0	0	0	0	0	0	0	0	3.96087	0	0	0	0	0	0
H12	naive	G4	5	0	0	0	0	0	0	0	0	0	0	0	0	0	0	0	0	0	0	0	0	0	0	0	1.98773	0	0	0	0	0	0	0	0	0	0	0	0	0	0	0	0	0	0	0	0	0	0
I12	naive	G4	5	0	0	0	0	0	0	0	0	0	0	0	0	0	0	0	0	0	0	0	0	0	0	0	0	0	0	0	0	0	0	0	0	0	0	0	0	0	0	0	0	0	0	0	0	0	0
J15	naive	G4	5	0	0	0	0	0	0	0	0	0	0	0	0	0	0	0	0	0	0	0	0	0	0	0	0	0	0	0	0	0	0	0	0	0	0	0	0	0	0	0	0	0	0	0	0	0	0
H16	naive	G4	5	0	0	0	0	0	0	0	0	0	0	0	0	0	0	0	0	0	0	0	0	0	0	0	0	0	0	0	0	0	0	0	0	0	0	0	0	0	0	0	0	0	0	0	0	0	0
J16	naive	G4	5	0	0	0	0	0	0	0	0	0	0	0	0	0	0	0	0	0	0	0	0	0	0	0	0	0	0	0	0	0	0	0	0	0	0	0	0	0	0	0	0	0	0	0	0	0	0
H20	naive	G4	5	0	0	0	0	0	0	0	0	0	0	0	0	0	0	0	0	0	0	0	0	0	0.788638	0	0	0	0	0	0	0	0	0	0	0	0	0	0	0	0	0	0	0	0	0	0	0	0
J20	naive	G4	5	0	0	0	0	0	0	0	0	0	0	0	0	0	0	0	0	0	0	0	0	0	0	0	0	0	0	0	0	0	0	0	0	0	0	0	0	0	0	0	0	0	0	0	0	0	0
I22	naive	G4	5	0	0	0	0	0	0	0	0	0	0	5.21757	0	0	0	0	0	0	0	0	0	0	0	0	0	0	0	0	0	0	0	0	0	0	0	0	0	0	8.1406	0	0	0	0	0	0	0	0
J24	naive	G4	5	0	0	0	0	0	0	0	0	0	0	0	0	0	0	0	0	0	0	0	0	0	0	0	0	0	0	0	0	0	0	0	0	0	0	0	0	0	0	0	0	0	0	0	0	0	0
P14	blood	G3	6	0	2.6657	0	3.20059	0	0	0	0	0	0	0	0	0	0	0	0	0	0	0	0	0	2.06042	0	0	0	0	0	0	0	0	2.6447	0	8.52421	0	0	0	0	0	2.28038	0	0	0	0	0	0	0
N3	blood	G2	6	0	0	0	0	0	0	0	0	1.86837	0	0	0	0	0	0	0	0	0	0	0	0	0.744638	0	0	0	0	0	0	0	0	0	0	0	0	0	0	0	0	0	0	0	0	0	0	0	0
N4	blood	G2	6	0	0	0	0	0	0	3.47594	0	0	0	0	0	0	0	0	0	0	6.36859	0	0	0	0	0	0	0	0	0	0	0	0	0	0	4.89515	0	0	0	0	0	0	0	0	0	0	0	0	0
N5	blood	G2	6	0	0	0	7.85856	0	0	0	0	0	0	0	0	0	0	0	0	0	0	0	0	0	2.01759	0	0	0	0	0	0	0	0	0	0	4.68127	0	0	0	3.24194	0	0	0	2.42772	0	0	0	0	0
M8	blood	G2	6	8.08024	0	0	0	0	0	0	0	0	0	0	0	8.29003	0	0	0	0	0	0	0	0	0	0	4.09878	4.1293	0	0	0	0	0	0	0	7.22677	0	0	0	0	0	0	0	0	0	0	0	0	0
M11	blood	G2	6	0	6.60032	0	0	0	0	0	0	0	0	0	0	0	0	0	0	0	0	0	0	0	0	0	0	0	0	0	0	0	0	0	0	0	0	0	0	0	0	0	0	0	0	0	0	0	0
N15	blood	G2	6	0	0	0	0	0	0	0	0	0	0	0	0	5.96085	0	1.93866	0	0	0	0	0	0	0	0	0	4.01547	0	0	0	0	0	0	0	4.67957	0	0	0	0	2.21384	0	0	3.40941	0	0	0	0	0
M16	blood	G2	6	6.51171	8.09762	0	2.30643	0	0	0	0	0	0	0	0	0	0	0	0	0	5.12811	0	0	0	1.71859	3.16777	0	4.9489	0	0	0	5.42727	0	0	0	5.68735	0	0	0	0	5.3157	0	0	2.79177	0	0	0	0	0
M22	blood	G2	6	0	0	0	0	0	0	0	0	0	0	0	0	0	0	0	0	0	0	0	0	0	0	0	0	0	0	0	0	0	0	0	0	8.13126	0	0	0	0	0	0	0	0	0	0	0	0	0
M23	blood	G2	6	0	9.53772	0	0	0	0	0	0	0	0	0	0	1.36613	0	0	0	0	0	0	0	0	0	0	0	0	0	0	0	0	0	0	0	0	0	0	0	0	0	0	0	0	0	0	0	0	0
M24	blood	G2	6	0	6.36702	0	0	0	0	0	0	0	0	0	0	6.07771	0.88389	0	0	0	0	0	0	0	0	0	0	0	0	0	0	0	0	0	0	0	0	0	0	0	0	0	0	0	0	0	0	0	0
N24	blood	G2	6	0	0	3.61865	0	0	0	0	0	0	0	0	0	0	0	0	0	0	0	0	0	0	0	0	0	0	0	0	0	4.33974	3.88588	0	0	0	0	0	0	0	0	0	0	0	0	0	0	0	0
P12	blood	G3	6	0	0	0	0	0	0	5.93445	0	0	0	0	0	0	0	0	0	0	0	0	0	0	0	0	0	0	0	0	0	0	0	0	0	0	0	0	0	0	5.77752	0	4.94541	0	0	0	0	0	0
O14	blood	G3	6	0	0	0	0	0	0	0	0	0	0	0	0	0	0	0	0	0	0	0	0	0	1.97717	0	0	0	0	0	0	0	0	0	0	7.0984	0	0	0	0	0	0	0	0	0	0	0	0	0
O17	blood	G3	6	0	0	0	0	0	0	0	0	0	0	0	0	0	0	0	0	0	0	0	0	0	0	0	0	0	0	0	0	5.97358	0	0	0	0	0	0	0	0	0	0	0	3.95686	0	0	0	0	0
P17	blood	G3	6	0	6.46829	0	0	0	0	0	0	0	0	0	0	0	0	0	0	0	0	0	0	0	0	0	0	0	0	0	0	0	0	0	0	0	0	0	0	0	0	0	0	0	0	0	0	0	0
C1	naive	G2	6	0	3.60584	0	0	0	0	0	0	0	0	0	0	0	0	0	0	0	0	0	0	0	4.13533	0	0	0	0	0	0	0	0	0	0	6.47127	0	0	0	0	0	0	0	5.71231	0	0	0	5.03702	0
C8	naive	G2	6	5.35918	0	0	0	0	0	0	0	0	0	0	0	0	0	0	0	0	0	0	0	5.35859	0	0	0	0	0	0	0	0	0	0	0	6.91647	0	0	0	0	0	0	0	0	0	0	0	0	0
C9	naive	G2	6	0	0	0	0	0	0	0	0	0	0	0	0	0	0	0	0	0	0	0	0	0	0	0	0	0	0	0	0	0	0	0	0	3.88948	0	0	0	0	0	0	0	4.31507	0	0	0	0	0
C11	naive	G2	6	0	0	0	0	2.05691	0	0	0	0	0	3.37159	0	0	0	0	0	0	0	0	0	2.51187	3.78298	0	0	0	0	0	0	0	0	0	0	7.75483	2.60661	0	0	0	6.58959	0	0	0	0	0	0	0	0
D14	naive	G2	6	0	3.66432	0	0	0	0	0	0	0	0	0	0	0	0	0	0	0	1.94617	0	0	0	0	0	0	0	0	0	0	0	0	0	0	0	0	0	0	0	0	0	0	0	0	0	0	2.39641	0
D15	naive	G2	6	0	2.75112	0	0	0	0	9.45982	0	0	0	0	0	6.77842	0	0	0	0	0	0	0	0	0	0	0	0	0	0	0	0	0	0	0	3.61472	0	0	0	0	0	0	0	0	0	0	0	0	0
C16	naive	G2	6	3.31412	10.4038	0	2.26315	0	0	0	0	0	0	0	0	1.3719	0	0	0	0	0	0	1.05486	0	3.54395	0	0	0	0	0	0	0	0	0	0	5.63397	0	0	0	0	0	0	0	0	2.45358	0	0	0.625988	0
E2	naive	G3	6	0	9.87185	0	0	0	0	1.41342	0	0	0	0	0	0	0	0	0	0	0	0	0	0	2.92016	0	0	0	0	0	0	0	0	0	0	8.52946	0	0	0	2.7958	0	0	0	0	0	0	0	0	0
G12	naive	G3	6	0	0	0	0	0	0	0	0	0	0	0	0	0	0	0	0	0	0	0	0	0	0	0	0	0	0	0	0	0	0	0	0	5.20172	0	0	0	0	0	0	0	0	0	0	0	0	0
E14	naive	G3	6	0	9.36926	0	0	0	0	0	0	0	0	0	0	0	0	0	0	0	0	0	0	0	1.44264	0	0	0.485654	0	0	0	8.6662	0	0	0	7.13612	0	0	0	0	0	0	0	0	0	0	0	0	0
F16	naive	G3	6	0	0	0	0	0	0	0	0	6.04795	0	0	0	0	0	0	0	0	0	0	0	0	0	0	0	0	0	0	0	0	0	0	0	0	0	0	0	0	0	0	0	0	0	0	0	0	0
G17	naive	G3	6	0	6.86152	0	0	0	0	0	0	6.21335	0	0	0	0	0	0	0	0	1.34282	0	0	0	0	0	0	0	0	0	0	0	0	0	0	7.07354	0	0	0	0	0	0	0	0	0	0	0	0	0
G19	naive	G3	6	6.77498	4.83841	0	0	0	0	0	0	0	0	0	0	0	0	0	0	0	0	0	0	0	4.27994	0	0	0	0	0	0	0	0	0	0	9.45535	0	0	0	1.04628	0	0	0	0	0	0	0	0	0
G20	naive	G3	6	0	0	5.18141	4.83173	0	0	0	0	0	0	0	0	0	0	0	0	0	0	0	0	0	3.62567	0	0	0	0	0	0	0	0	0	0	9.19229	0	0	0	0	0	0	0	0	0	0	4.63363	0	0
E24	naive	G3	6	0	9.72609	0	0	0	0	0	0	0	0	0	0	0	0	0	0	0	0	0	0	0	6.00856	3.75321	0	0	0	0	0	0	0	0	2.9037	0	0	0	0	0	0	0	0	0	0	0	0	4.29276	0
H2	naive	G4	6	0	0	0	0	0	0	0	0	0	0	0	0	0	0	0	0	0	0	0	0	0	0	0	0	0	0	0	0	0	0	0	0	5.57082	0	0	0	0	0	0	0	0	0	0	0	0	0
I3	naive	G4	6	0	9.158	6.45246	0	0	10.6114	0	0	0	0	0	0	0	0	0	0	0	0	0	0	0	0	0	5.1702	0	0	0	0	0	0	0	0	0	0	0	0	0	0	0	0	0	0	0	0	0	0
I9	naive	G4	6	0	0	0	0	0	0	0	0	0	0	0	0	2.9214	0	0	0	0	0	0	8.06985	6.64007	0	0	4.4577	0	0	0	0	0	0	0	0	4.65406	0	0	0	0	0	0	0	0	0	0	0	0	0
I11	naive	G4	6	3.8674	0	0	0	0	4.05605	0	0	0	0	0	0	0	0	0	0	0	0	0	0	0	0	4.98547	0	0	0	0	0	0	0	0	0	8.78454	0	0	0	0	0	0	0	0	0	0	0	0	0
J11	naive	G4	6	0	0	0	0	0	0	0	0	0	0	0	0	2.48477	0	0	0	0	0	0	0	0	0	0	0	0	0	0	0	0	0	0	0	0	0	0	0	0	0	0	0	0	0	0	0	0	0
I13	naive	G4	6	0	0	0	0	0	0	0	0	0	0	0	0	6.35365	0	0	0	0	0	0	0	0	0	0	0	0	0	0	0	0	0	0	0	0	0	0	0	0	0	0	0	0	0	0	0	0	0
H15	naive	G4	6	7.60163	0	0	6.67164	0	0	0	0	0	0	0	0	0	0	0	0	0	0	0	0	0	0	0	6.5166	0	0	0	0	0	0	0	0	8.46736	0	0	0	0	0	0	0	0	0	0	0	0	0
I15	naive	G4	6	8.78571	0	0	0	0	0	0	0	0	0	0	0	0	0	0	0	0	0	0	0	0	0	0	0	7.55282	0	0	0	0	0	4.98506	0	0	0	0	0	0	0	0	0	0	0	0	0	0	0
H19	naive	G4	6	4.72507	6.70977	3.9234	0	0	0	0	0	0	0	0	0	0	0	0	0	0	0	0	0	0	2.43113	0	0	0	0	0	0	0	0	0	0	0	0	0	0	0	9.19266	0	0	2.7399	0	0	0	2.90507	0
I19	naive	G4	6	0	0	0	0	0	0	0	0	5.86972	0	0	0	0	0	0	0	0	0	0	0	0	0	0	0	0	0	0	0	0	0	0	0	0	0	0	0	0	0	0	0	0	0	0	0	0	0
J21	naive	G4	6	0	0	0	0	0	0	0	0	0	0	0	0	0	0	0	0	0	0	0	0	0	0	0	0	0	0	0	0	0	0	0	0	3.92256	0	0	0	0	0	0	0	0	0	0	0	0	0
J22	naive	G4	6	0	0	0	4.99704	0	0	0	0	5.11716	0	3.29389	6.43544	0	0	0	0	0	0	0	0	0	4.54741	0	0	0	0	0	0	0	0	0	0	0	0	0	0	0	6.51714	0	0	3.18215	0	0	0	0	0
L21	blood	G1	7	0	9.34175	0	8.55618	9.05203	0	3.87286	0	0	0	0	0	6.5641	0	3.02433	0	0	0	0	0	4.3217	0	0	0	0	0	0	0	0	0	0	0	0	5.39645	0	0	0	9.92553	0	0	6.20402	0	0	0	0	0
L17	blood	G1	7	0	0	0	0	0	0	8.17022	0	0	0	0	0	0	0	0	0	0	0	0	0	0	0	0	0	0	0	0	0	0	0	0	0	0	0	0	0	3.89334	0	0	0	0	0	0	0	4.50121	0
K16	blood	G1	7	0	0	0	0	0	0	3.50553	0	0	0	0	0	0	0	0	0	0	0	6.44273	0	0	0	0	3.48616	3.27767	0	5.58748	0	0	6.15118	0	0	0	0	0	0	0	0	0	0	0	0	7.77521	0	0	0
K19	blood	G1	7	1.8283	0	0	0	1.58466	0	0	0	1.95632	0	3.54171	0	2.71103	0	0	0	0	0	0	0	4.94258	0	0	0	0	0	0	0	0	0	0	0	0	0	0	0	0	0	0	0	0	0	7.68684	0	0	0
K14	blood	G1	7	0	0	6.38153	0	5.37748	0	0	0	0	0	0	0	0	0	0	0	0	0	5.39779	0	0	0	0	0	0	0	0	0	0	0	0	0	0	0	0	0	5.97718	0	0	0	0	0	0	0	0	0
L20	blood	G1	7	0	5.77609	0	0	0	0	4.04369	0	2.63665	0	0	5.6313	0	0	0	0	0	0	0	3.66568	0	0	0	0	0	0	4.21775	0	3.05632	0	0	0	0	0	0	0	0	0	0	0	0	0	3.33062	0	0	0
L24	blood	G1	7	0	0	6.27214	0	6.6818	0	0	0	7.38013	0	0	10.7076	7.15914	0	0	0	0	0	7.0825	0	0	0	0	0	0	0	0	0	0	0	0	0	0	0	0	0	3.47662	0	0	0	0	0	0	0	0	0
N2	blood	G2	7	7.43504	0	0	0	6.15207	0	10.2905	0	0	0	0	0	0	0	0	3.63097	0	5.13968	0	3.95475	0	0	0	0	0	0	5.55086	0	8.15141	7.22167	0	5.30175	0	0	0	0	0	0	0	0	6.37378	0	0	3.9806	0	0
M5	blood	G2	7	0	0	0	0	7.61803	0	0	3.11364	0	0	0	2.94853	5.51408	0	0	0	0	0	0	0	0	0	0	0	0	0	0	0	5.69011	0	1.60037	0	2.82514	0	0	0	0	4.49742	0	0	0	0	0	0	0	0
N7	blood	G2	7	4.584	0	0	0	4.00095	0	0	0	0	0	1.47304	7.26641	0	0	3.4684	0	0	8.33271	5.9522	0	0	4.38123	0	0	0	0	0	0	7.77718	0	0	2.1017	3.05179	0	0	0	1.71974	0	3.55185	0	1.94493	0	0	0	0	0
M20	blood	G2	7	0	0	0	0	0	0	0	0	0	0	0	0	0	0	0	0	0	0	0	0	0	0	0	0	0	0	0	0	0	0	0	0	0	0	3.01756	0	0	0	0	0	0	0	0	5.86282	0	0
H17	naive	G4	7	0	0	0	0	0	0	0	0	0	0	0	0	0	0	0	0	6.00782	0	0	0	0	0	0	0	0	0	0	0	0	0	0	0	0	0	0	0	0	0	5.76555	0	0	0	0	0	0	0
B1	naive	G1	7	5.76646	0	0	0	0	0	4.24113	0	7.60049	5.72065	0	0	2.93358	7.94775	0	0	0	0	5.44245	0	0	0	0	0	0	0	4.41654	0	0	0	0	0	5.38161	0	0	0	0	0	0	0	5.60612	0	0	0	0	0
D24	naive	G2	7	0	0	0	0	0	0	2.96563	0	0	0	0	0	5.13306	0	0	0	0	8.19418	0	0	0	0	4.38355	4.79952	0	0	0	0	0	0	0	0	0	0	0	0	0	0	0	0	0	4.4829	0	0	0	0
A6	naive	G1	7	0	9.43469	0	6.00109	2.9348	0	0	0	0	0	2.30221	5.19562	0	0	0	0	0	0	6.67448	0	0	0	5.86828	0	0	0	0	7.37252	0	0	0	0	0	0	0	0	6.36198	0	0	0	0	0	0	0	0	7.20492
A15	naive	G1	7	0	0	0	3.43368	0	0	0	6.32105	0	0	0	0	0	0	5.87724	2.21346	0	3.37548	5.33362	0	0	0	0	2.68827	0	0	0	3.78743	0	0	0	5.53423	3.76069	0	0	0	0	0	0	0	0	0	3.79991	0	0	0
C6	naive	G2	7	0	2.82597	3.99887	0	6.89608	0	0	0	0	0	0	0	2.96854	0	0	0	0	0	0	0	8.33627	4.03182	0	4.75083	0	0	0	6.5308	0	8.64277	0	4.10345	0	0	0	0	3.61821	0	0	0	0	0	0	0	0	0
B14	naive	G1	7	0	0	0	4.51277	0	0	4.12127	6.15591	0	0	0	6.54785	1.33359	0	4.48787	0	0	0	0	0	0	1.9321	0	0	0	0	4.85616	0	0	0	0	0	6.23896	0	0	0	0	0	6.8764	0	0	0	0	0	0	0
C21	naive	G2	7	0	3.04143	0	0	5.3891	0	0	0	0	0	0	0	0	0	2.09307	0	0	0	0	5.38767	0	0	0	0	0	0	0	0	0	0	0	0	0	6.57159	0	0	0	0	0	0	0	0	0	0	0	0
B6	naive	G1	7	0	0	0	0	0	6.47624	3.78967	0	0	0	3.54197	8.0135	0	0	4.40059	0	0	0	0	0	0	0	0	0	0	0	3.96169	0	0	0	0	0	0	4.34509	6.62898	0	0	0	0	0	7.04441	0	0	0	0	0
B8	naive	G1	7	0	7.79189	4.74684	0	0	9.86893	0	0	5.23599	0	4.00575	0	0	0	0	0	0	0	0	0	0	0	0	7.07829	0	0	0	0	4.74002	0	0	0	0	0	0	0	0	0	0	0	0	0	0	0	0	0
B16	naive	G1	7	0	0	4.82382	0	0	0	0	0	0	0	4.3547	0	0	0	2.94221	0	0	0	0	0	0	0	0	0	0	0	0	0	0	5.1542	0	0	0	0	0	0	0	0	0	0	0	0	0	0	0	0
B18	naive	G1	7	0	7.67208	0	9.07234	0	0	4.08224	0	6.76004	0	5.75255	0	3.97932	0	6.65804	2.64296	0	6.57998	0	0	0	0	0	4.61814	0	4.12119	0	0	0	0	5.21984	0	0	0	0	0	0	0	3.83962	0	0	0	0	4.42178	0	0
A22	naive	G1	7	0	0	0	0	0	0	0	0	0	0	0	0	0	0	0	2.98761	0	4.23796	0	0	0	0	0	0	0	0	0	0	0	0	0	9.31776	0	0	0	0	0	0	0	0	0	0	0	0	0	0
A23	naive	G1	7	2.61452	6.9104	0	0	7.18557	0	6.57691	0	3.65216	0	0	0	4.63682	0	0	0	7.90283	0	0	0	9.45153	3.50086	0	0	0	0	0	0	4.10666	0	0	0	0	0	0	0	0	2.75829	0	0	4.32647	0	0	0	0	0
D1	naive	G2	7	0	8.87899	0	0	0	0	0	0	0	0	0	10.6476	0	0	0	0	0	0	0	0	9.16799	0	3.71634	2.11525	0	4.45172	0	0	0	0	0	0	0	0	0	0	0	0	0	0	0	0	0	0	0	0
C2	naive	G2	7	0	0	0	0	4.48016	0	0	0	0	0	2.86909	0	0	0	0	0	0	0	0	0	0	0	0	0	0	0	0	0	0	0	0	0	0	0	0	0	0	0	0	0	0	0	0	0	0	0
D2	naive	G2	7	0	8.24636	1.70348	0	0	0	0	0	0	0	0	0	7.14072	0	0	0	0	2.33166	0	0	9.30566	0	0	0	0	0	5.63303	0	9.51793	6.02957	0	0	3.56072	0	0	0	0	0	7.08794	9.39324	0	0	0	0	1.14131	0
D17	naive	G2	7	0	0	0	0	3.74621	0	0	0	0	0	0	7.52488	0	0	0	0	0	3.61677	0	2.94118	0	0	0	0	0	2.4738	0	0	0	0	0	0	0	0	0	0	0	0	0	0	0	0	0	8.8475	0	0
C18	naive	G2	7	0	4.26866	0	0	2.70859	0	0	0	0	0	3.92547	6.84339	0	0	0	0	0	0	0	0	0	0	1.47065	0	0	0	0	0	0	0	0	0	0	0	0	0	0	0	0	0	0	0	0	0	0	7.65336
D20	naive	G2	7	0	0	0	0	6.77968	0	0	0	0	0	0	0	4.78441	0	0	0	0	4.97236	0	0	0	0	0	0	0	0	0	0	0	5.22301	0	0	0	0	3.63195	0	0	0	0	0	0	0	0	7.98617	0	0
D22	naive	G2	7	0	0	0	0	5.01479	0	0	0	0	0	0	0	0	0	0	0	0	0	0	0	0	0	0	0	0	0	0	0	0	0	0	0	0	0	0	0	0	0	0	0	0	2.35603	0	0	0	0
J10	naive	G4	7	0	0	6.07899	0	0	0	4.60776	0	0	0	0	0	0	0	0	0	0	0	0	0	9.72631	0	0	1.95608	0	0	0	0	6.07202	9.39514	0	0	2.93357	0	0	0	0	0	0	0	0	0	0	0	1.31191	0
H13	naive	G4	7	0	0	0	0	8.06168	0	6.06416	0	0	0	2.93179	0	2.44434	0	5.38271	1.57153	0	0	0	0	7.97247	1.61229	0	0	5.4793	0	5.60492	0	0	10.1703	1.71033	0	0	0	0	0	0	4.40019	7.4612	0	0	7.6541	0	0	2.47493	0
J18	naive	G4	7	0	0	0	0	0	0	0	0	4.62372	0	5.98091	5.7503	6.90014	0	0	0	0	0	0	0	0	0	0	3.89118	0	0	0	0	0	0	0	0	0	0	0	0	0	0	0	0	0	0	0	0	0	0
J19	naive	G4	7	0	0	0	0	0	0	0	0	2.55778	0	0	0	0	0	0	0	0	0	0	0	0	0	0	0	0	0	0	0	0	0	0	0	0	0	0	0	0	0	0	0	0	0	0	0	0	0
I21	naive	G4	7	0	0	6.8157	0	0	0	0	0	0	0	4.93425	0	0	0	3.60611	0	0	0	0	0	3.98889	0	0	0	0	0	0	0	0	0	0	0	0	0	0	0	0	0	0	0	0	0	0	0	0	0
I23	naive	G4	7	0	8.75949	0	0	8.11663	0	0	0	0	0	0	0	0	0	0	0	8.75792	3.29336	0	0	0	0	6.23862	0	0	0	0	0	6.47941	0	0	0	0	0	6.06672	0	4.53869	0	0	0	2.48705	0	0	0	0	0
K23	blood	G1	8	0	7.78321	0	0	4.27257	0	0	0	0	0	6.64948	7.89812	4.16605	0	4.42553	0	0	0	0	0	2.47126	0	0	0	5.30011	5.51772	0	0	0	0	1.79795	0	0	2.56544	0	0	3.90719	0	0	0	3.27798	2.96865	0	0	0	0
L14	blood	G1	8	0	10.0467	0	0	6.54667	4.45143	6.26807	0	7.68654	0	6.48197	6.27261	3.61829	0	0	0	0	0	0	0	7.11501	0	0	7.08663	0	4.05799	0	0	0	5.9717	5.37113	5.57923	0	0	0	0	0	0	0	0	0	0	0	0	0	0
K15	blood	G1	8	0	6.64148	0	0	4.6413	0	7.9073	0	5.55523	0	0	8.59411	3.39178	0	4.23681	0	0	0	0	0	0	1.97514	5.29728	4.71369	5.46014	0	0	0	0	0	2.90228	0	0	0	0	0	5.63834	3.63983	0	0	0	0	0	0	0	5.37945
L13	blood	G1	8	0	0	0	0	4.89713	0	0	0	0	0	6.42936	0	3.83977	0	0	2.13038	0	0	0	0	0	1.46577	0	0	0	0	0	0	0	0	0	0	0	0	0	0	0	5.14798	0	0	0	0	3.70107	6.73155	0	0
L19	blood	G1	8	6.84894	6.22687	0	4.10281	6.91181	7.65283	0	5.32509	5.45982	0	2.59598	6.3408	6.60525	0	0	0	0	0	0	0	4.32465	2.04663	0	5.02027	0	5.01273	0	6.00923	4.74684	0	2.1566	0	0	2.97603	0	0	0	4.27572	0	0	0	0	3.54442	0	0	4.50447
L5	blood	G1	8	7.73421	0	0	0	6.07542	0	5.85369	4.41258	5.61058	0	0	0	3.15388	0	0	0	4.86601	0	0	0	0	0	7.76689	0	0	4.3571	0	0	0	5.87455	0	0	0	0	0	0	4.0204	3.39762	0	0	4.7131	0	0	0	2.20273	0
H5	naive	G4	8	0	6.68847	0	0	0	0	6.47956	0	5.1281	0	2.16582	0	3.90876	0	0	2.36428	0	0	0	0	0	0	4.16776	0	0	5.15346	0	0	0	0	0	0	0	0	0	0	0	0	0	0	0	0	7.21376	8.54179	0	7.65056
A9	naive	G1	8	0	6.52519	0	0	4.27809	0	0	0	4.78204	0	0	7.95261	5.70212	0	0	0	0	0	0	0	0	0	0	7.09503	0	0	0	0	0	0	0	0	0	0	0	0	0	0	0	0	0	0	8.33629	0	0	7.77776
A18	naive	G1	8	3.55564	5.41764	0	6.59958	8.16827	0	0	0	0	0	2.58211	9.14531	0	0	0	0	0	0	0	0	7.46474	0	7.27392	0	0	3.74093	0	0	6.42925	8.51946	0	0	0	0	0	0	0	0	0	0	3.17069	0	0	0	4.57693	5.45607
B21	naive	G1	8	0	6.18284	0	0	4.50509	0	7.54445	0	3.51417	0	3.25724	5.88779	4.58173	0	0	4.02496	0	3.82066	6.2174	0	6.25493	0	5.15889	4.97704	4.75431	3.53801	0	0	4.91836	0	0	0	0	0	0	0	0	6.20406	0	4.58523	5.39977	0	0	0	3.67518	7.0873
A17	naive	G1	8	0	9.26297	0	0	6.30828	0	0	0	5.26977	0	3.12354	0	4.43817	0	3.96156	0	0	0	0	0	9.40981	0	7.5604	5.80635	0	6.73106	0	0	6.73331	7.24737	3.53311	0	0	5.42645	0	0	6.14463	0	0	0	4.68719	0	0	0	6.74288	0
B23	naive	G1	8	0	0	0	3.07977	0	0	0	0	0	0	0	0	2.04097	0	5.62414	1.91295	5.1007	3.02326	0	0	7.72447	0	0	0	0	0	0	0	0	0	0	0	0	2.87347	7.67388	0	0	0	0	0	5.39354	0	0	8.01982	0	0
B20	naive	G1	8	5.25453	9.29009	0	0	0	0	6.3935	0	0	0	0	0	5.23153	0	0	3.49226	5.39801	0	9.01748	0	0	2.6663	5.7078	6.37251	3.28097	6.54857	0	0	0	0	0	0	6.3848	0	0	0	0	0	5.72936	0	0	0	0	0	0	5.39827
B3	naive	G1	8	0	0	0	0	7.20196	0	3.60508	9.92825	0	0	0	0	0	0	0	0	0	0	6.74106	0	5.00387	0	2.58805	3.58559	0	0	0	7.40304	4.46626	6.73855	0	0	6.0097	0	0	0	0	0	0	0	0	0	0	0	5.61935	0
A20	naive	G1	8	3.68209	3.64163	0	5.96791	5.8241	3.86895	6.49604	0	0	0	1.90449	0	7.07902	0	0	2.91244	0	0	0	4.38943	6.38914	4.63448	4.53963	4.36077	2.71208	4.4204	0	0	3.37443	3.84998	0	4.72408	0	0	0	0	2.18382	3.83976	4.69261	0	4.77709	0	3.65546	0	0	5.02067
B10	naive	G1	8	0	6.42178	0	0	5.92839	0	0	0	6.44801	0	2.59993	0	0	0	0	0	0	0	0	0	0	3.38198	3.20376	6.77073	0	0	0	0	5.72436	8.80316	0	0	0	0	0	0	0	4.67655	0	0	0	0	0	0	0	0
B2	naive	G1	8	0	0	0	7.31376	6.6844	0	0	0	0	0	4.12377	0	0	0	3.50477	5.32566	0	0	0	0	4.83571	0	0	0	0	0	6.09824	4.58169	0	0	0	0	4.55405	3.99202	0	0	0	0	7.05903	0	0	0	0	0	0	0
A14	naive	G1	8	0	8.07201	0	7.99881	4.96925	0	3.35956	0	4.30199	0	4.4265	8.82678	3.26099	0	5.7622	3.72216	0	5.58993	7.05368	7.23018	6.94815	4.80933	0	0	0	0	3.52718	0	0	0	0	0	0	0	0	0	0	0	4.99824	0	0	0	0	0	0	3.06126
B15	naive	G1	8	0	5.57519	0	0	7.29055	0	0	0	2.96195	0	0	8.94834	2.24403	0	7.1087	5.56838	0	0	0	2.60201	9.09835	1.44923	0	5.66293	0	5.28676	6.53376	3.66468	4.88619	0	0	0	0	0	0	0	0	6.77202	0	0	4.24041	0	0	0	6.7937	0
B7	naive	G1	8	4.67984	7.90645	0	0	4.34367	0	5.71701	0	2.99154	0	0	3.8013	5.14707	0	2.67697	0	7.53228	0	6.62819	0	0	2.18381	0	0	0	0	0	0	0	0	0	4.47046	0	0	0	0	0	2.98715	0	0	0	3.5592	6.41785	0	0	0
B4	naive	G1	8	0	0	0	0	7.79615	0	9.99617	4.46763	0	0	0	0	2.69642	0	0	2.55263	9.91926	0	4.21238	3.07706	4.99401	0	5.09526	0	0	5.37775	0	0	0	0	0	0	0	0	0	0	0	0	0	0	0	0	0	0	6.56627	0
B5	naive	G1	8	0	0	3.63414	0	6.3168	0	3.70308	0	0	0	0	0	3.30964	0	0	0	0	0	0	3.71126	0	0	0	0	0	0	0	0	0	5.06775	0	0	0	0	0	0	0	0	6.51432	0	3.54548	0	0	0	4.02226	4.88784
B13	naive	G1	8	0	9.1215	0	0	0	0	0	0	4.65938	0	4.78529	9.69549	0	0	0	0	0	0	4.8818	0	0	0	5.77858	0	0	0	0	0	0	4.1083	0	0	0	0	0	0	0	0	0	0	5.61404	0	0	0	0	0
B24	naive	G1	8	7.83576	4.67326	0	0	3.44666	0	0	0	0	0	0	0	0	0	3.59349	3.90121	7.7204	0	0	0	9.13179	0	0	0	0	2.21171	3.70424	0	0	0	0	0	0	6.01783	0	0	0	0	0	0	0	0	8.54137	0	1.88197	3.23227
[truncated: 5,000 more columns]
