# Supplementary material for: Single-cell analysis of mosquito hemocytes identifies signatures of immune cell subtypes and cell differentiation
Source: eLife. 2021 Jul 28;10:e66192. doi: 10.7554/eLife.66192 (PMC8376254; doi:10.7554/eLife.66192)
Supplement: Supplementary file 2. [file elife-66192-supp2.xlsx]

## Sheet: Cluster 2
Gene	Gene name	Annotation	GO term	p_val	FDR	t_stat	logFC	Naïve	Blood-fed
AGAP028370	ATP6	adenosine triphosphatase subunit 6 [Source:European Nucleotide Archive%3BAcc:ATP6]	D	6.21397e-07	0.00207578	6.95983	2.75831	2.65887	5.41718
AGAP028366	COX2	cytochrome c oxidase subunit II [Source:European Nucleotide Archive%3BAcc:COX2]	REDOX/STRESS/MIT	1.56475e-08	0.000418163	8.9343	2.48722	3.58626	6.07348
AGAP028387	CYTB	cytochrome b [Source:European Nucleotide Archive%3BAcc:CYTB]	REDOX/STRESS/MIT	2.13715e-07	0.00114226	7.50452	2.44576	4.24456	6.69032
AGAP028371	COX3	cytochrome c oxidase subunit III [Source:European Nucleotide Archive%3BAcc:COX3]	REDOX/STRESS/MIT	6.91131e-08	0.000923489	8.10416	2.38571	5.04013	7.42584
AGAP001826	Lp	lipophorin [Source:VB Community Annotation]	TRP	7.2465e-06	0.0148966	5.77593	2.30239	0.659747	2.96213
AGAP028364	COX1	cytochrome c oxidase subunit I [Source:European Nucleotide Archive%3BAcc:COX1]	REDOX/STRESS/MIT	2.03119e-07	0.00114226	7.531	2.15971	6.98724	9.14695
AGAP028380	ND5	NADH dehydrogenase subunit 5 [Source:European Nucleotide Archive%3BAcc:ND5]	REDOX/STRESS/MIT	1.95448e-07	0.00114226	7.55107	2.03143	1.86175	3.89318
AGAP028382	ND4	NADH dehydrogenase subunit 4 [Source:European Nucleotide Archive%3BAcc:ND4]	REDOX/STRESS/MIT	1.4817e-06	0.00395968	6.53076	1.89992	1.96302	3.86294
AGAP028391	lsu rRNA	lsu rRNA	U	2.36668e-05	0.0372042	5.23336	1.77906	3.06068	4.83974
AGAP028389	ND1	NADH dehydrogenase subunit 1 [Source:European Nucleotide Archive%3BAcc:ND1]	REDOX/STRESS/MIT	5.46173e-07	0.00207578	7.02461	1.75682	1.44182	3.19864
AGAP011363	0	Ras-related protein Rab-6A [Source:VB Community Annotation]	D	8.74141e-05	0.0707895	4.64933	1.72291	0.533065	2.25598
AGAP007087	RpL41	60s ribosomal protein L41 [Source:UniProtKB/TrEMBL%3BAcc:Q52P89]	RTT	2.72577e-05	0.0404687	5.16955	1.27885	3.85495	5.1338
AGAP007120	0	nucleoside-diphosphate kinase [Source:VB Community Annotation]	D	3.13699e-07	0.00139722	7.30629	1.22776	3.47933	4.70708
AGAP002502	0	translation initiation factor 4G [Source:VB Community Annotation]	RTT	3.86257e-05	0.0430097	5.01285	1.16257	0.322687	1.48526
AGAP012056	0	cofilin [Source:VB Community Annotation]	CS	2.93805e-05	0.0413244	5.13575	1.05817	3.43774	4.49592
AGAP000651	Actin5C	Actin-5C [Source:UniProtKB/Swiss-Prot%3BAcc:P84185]	CS	8.57265e-05	0.0707895	4.65795	1.05066	6.44686	7.49752
AGAP003025	RpLp2	60S ribosomal protein LP2 [Source:VB Community Annotation]	RTT	8.61028e-05	0.0707895	4.65602	1.03346	2.84883	3.88229
AGAP007927	RpL40	60S ribosomal protein L40 [Source:VB Community Annotation]	RTT	3.36962e-05	0.0428818	5.0741	0.986994	2.34263	3.32963
AGAP000551	0	2-oxoglutarate dehydrogenase E1 component DHKTD1 [Source:VB Community Annotation]	M	3.68917e-05	0.0428818	5.03344	0.894631	0.0339282	0.928559
AGAP028369	ATP8	adenosine triphosphatase subunit 8 [Source:European Nucleotide Archive%3BAcc:ATP8]	D	8.26934e-07	0.00245544	6.81738	0.890051	0.15731	1.04736
AGAP007740	RpLP1	60S ribosomal protein LP1 [Source:VB Community Annotation]	RTT	0.000101011	0.0793949	4.58542	0.861739	4.2661	5.12784
AGAP008329	RpS5	40S ribosomal protein S5 [Source:VB Community Annotation]	RTT	5.3261e-05	0.0527166	4.86929	0.790519	3.80096	4.59148
AGAP013400	0	fatty acid bindin protein	U	4.92505e-05	0.0506219	4.9042	0.788742	0.306908	1.09565
AGAP012284	RpL18a-1	60S ribosomal protein L18a [Source:UniProtKB/TrEMBL%3BAcc:Q7PV82]	RTT	5.91047e-06	0.0143592	5.87096	0.750534	4.02982	4.78036
AGAP011284	0	Eukaryotic translation initiation factor 5A [Source:UniProtKB/TrEMBL%3BAcc:Q7PSR5]	RTT	0.000133425	0.0990456	4.4627	0.742009	4.42013	5.16213
AGAP028383	ND4L	NADH dehydrogenase subunit 4L [Source:European Nucleotide Archive%3BAcc:ND4L]	REDOX/STRESS/MIT	1.08831e-05	0.0207744	5.58777	0.715812	0.321976	1.03779
AGAP010814	TEP6	thioester-containing protein 6 [Source:VB Community Annotation]	I	0.000119343	0.0911233	-4.51184	-1.60147	1.98959	0.388122
AGAP005625	SCRASP1	Class A Scavenger Receptor (SRCR domain) with Serine Protease domain. [Source:VB Community Annotation]	I	6.99514e-05	0.066547	-4.74807	-1.84006	3.84485	2.00479
AGAP028439	0	Unknown	U	1.8253e-05	0.0304871	-5.35117	-1.85022	4.53502	2.68481
AGAP010815	TEP1	thioester-containing protein 1 [Source:VB Community Annotation]	I	1.57283e-05	0.0280216	-5.419	-2.56214	3.27725	0.715105
AGAP000689	0	Unknown	U	3.69062e-05	0.0428818	-5.03326	-2.58995	2.99216	0.402215
AGAP007347	LYSC1	C-type lysozyme [Source:VB Community Annotation]	I	4.07269e-05	0.0435354	-4.98913	-2.85599	3.57925	0.723255

## Sheet: Cluster 4
Gene	Gene name	Annotation	GO term	p_val	FDR	t_stat	logFC	Naïve	Blood-fed
AGAP001826	Lp	lipophorin [Source:VB Community Annotation]	TRP	1.82999e-05	0.0349318	4.58091	1.9215	0.29042	2.21192
AGAP010382	Ars2	Serrate RNA effector molecule homolog [Source:UniProtKB/Swiss-Prot%3BAcc:Q5TUF1]	D	0.00013452	0.0946028	3.95405	1.837	0.709182	2.54618
AGAP009595		sodium/potassium-transporting ATPase subunit beta [Source:VB Community Annotation]	TRP	7.60818e-05	0.0782004	4.13645	1.68497	0.617362	2.30233
AGAP011386		solute carrier family 7 (cationic amino acid transporter%2C y+ system) [Source:VB Community Annotation]	TRP	2.23251e-10	5.96617e-06	7.92285	1.66267	0.079902	1.74257
AGAP000297		Unknown	D	8.26865e-07	0.00494538	5.51046	1.48177	0.014238	1.49601
AGAP001045		DNA-directed RNA polymerase I subunit RPA49 [Source:VB Community Annotation]	RTT	9.99356e-06	0.0222557	4.76566	1.42098	0.15195	1.57293
AGAP011156		importin 9 [Source:VB Community Annotation]	TRP	8.32524e-07	0.00494538	5.50845	1.31421	0.136881	1.45109
AGAP003904		AIF-like mitochondrial oxidoreductase (Nfrl) [Source:VB Community Annotation]	D	4.4765e-05	0.0596599	4.30363	1.29847	0.322171	1.62064
AGAP008096		Sphingomyelin phosphodiesterase [Source:UniProtKB/TrEMBL%3BAcc:A0A1S4GXA1]	M	2.48362e-05	0.0442483	4.48684	1.2403	0.108043	1.34835
AGAP006826		Integrin alpha-ps [Source:VB Community Annotation]	CS	4.18552e-05	0.0596599	4.32466	1.19203	0.0574306	1.24946
AGAP004438		transcription factor Sp%2C invertebrate [Source:VB Community Annotation]	RTT	5.35787e-05	0.0596599	4.24723	1.07256	0.136075	1.20864
AGAP008693		Leptin receptor overlapping transcript-like 1 [Source:VB Community Annotation]	D	5.15148e-05	0.0596599	4.25958	1.04558	0.401648	1.44723
AGAP003193		GPN-loop GTPase [Source:VB Community Annotation]	D	6.45228e-08	0.000862154	6.25823	0.922303	0.0594904	0.981794
AGAP006281		Unknown	D	9.25269e-07	0.00494538	5.47727	0.875688	0.0201757	0.895864
AGAP010488		ubiquinone biosynthesis methyltransferase [Source:VB Community Annotation]	D	3.62981e-06	0.0115651	5.071	0.835538	0.0433559	0.878894
AGAP009179		nucleolar protein 6 [Source:VB Community Annotation]	D	7.91184e-05	0.0783096	4.12402	0.792452	0.327548	1.12
AGAP003784		glucose dehydrogenase (acceptor) [Source:VB Community Annotation]	TRP	5.59613e-05	0.0598204	4.23354	0.774968	0.00194489	0.776913
AGAP002333		Domain of unknown function (DUF947)	U	5.90732e-06	0.0146691	4.92472	0.762836	0.109917	0.872753
AGAP010432		DnaJ homolog subfamily C member 11 [Source:VB Community Annotation]	REDOX/STRESS/MIT	0.000118498	0.0855875	3.99491	0.705373	0.0241253	0.729498
AGAP008131		UDP-N-acetylglucosamine--dolichyl-phosphate N-acetylglucosaminephosphotransferase [Source:VB Community Annotation]	M	5.05294e-05	0.0596599	4.26565	0.658969	0.0577379	0.716707
AGAP006251		syntaxin 6 [Source:VB Community Annotation]	TRP	1.36043e-05	0.0279662	4.67171	0.635186	0.00683765	0.642023
AGAP002465		ferritin heavy chain [Source:VB Community Annotation]	D	2.60583e-06	0.0102114	-5.17004	-2.07643	5.42308	3.34665
AGAP000249		mannosyl-glycoprotein endo-beta-N-acetylglucosaminidase [Source:VB Community Annotation]	M	2.67474e-06	0.0102114	-5.16225	-2.86816	4.87727	2.0091
