# Supplementary material for: Single-cell analysis of mosquito hemocytes identifies signatures of immune cell subtypes and cell differentiation
Source: eLife. 2021 Jul 28;10:e66192. doi: 10.7554/eLife.66192 (PMC8376254; doi:10.7554/eLife.66192)
Supplement: Supplementary file 3. [file elife-66192-supp3.xlsx]

## Sheet: Enriched markers
Gene ID	Gene Name	Annotation	p_val	avg_log2FC	pct.1	pct.2	p_val_adj	cluster
AGAP011737		A disintegrin and metalloproteinase with thrombospondin motifs 16 [Source:VB Community Annotation]	3.25857e-06	1.57536	0.692	0.146	0.0427883	C_1
AGAP009317		adenylate kinase [Source:VB Community Annotation]	6.62555e-07	1.57328	0.615	0.105	0.00870001	C_1
AGAP009867		AFG1-family ATPase [Source:VB Community Annotation]	2.31421e-07	1.9042	0.462	0.054	0.00303879	C_1
AGAP000657		amiloride-sensitive sodium channel [Source:VB Community Annotation]	2.97615e-06	1.78901	0.462	0.067	0.0390798	C_1
AGAP011348		arylsulfatase b [Source:VB Community Annotation]	1.73956e-07	1.88771	0.538	0.079	0.00228422	C_1
AGAP003680	ABCH2	ATP-binding cassette transporter (ABC transporter) family H member 2 [Source:VB Community Annotation]	3.26508e-06	2.25383	0.462	0.071	0.0428737	C_1
AGAP009829		beat protein [Source:VB Community Annotation]	1.47276e-07	2.41179	0.385	0.038	0.00193388	C_1
AGAP009723		cadherin [Source:VB Community Annotation]	4.68299e-07	1.32855	0.846	0.184	0.00614924	C_1
AGAP003289		carbonic anhydrase [Source:VB Community Annotation]	1.65399e-13	2.58419	0.615	0.046	2.17185e-09	C_1
AGAP003263		CDC42 small effector protein-like protein [Source:VB Community Annotation]	5.18025e-08	1.73502	0.692	0.113	0.000680218	C_1
AGAP009385		cellular retinaldehyde-binding protein [Source:VB Community Annotation]	1.51126e-08	1.69726	0.769	0.126	0.000198443	C_1
AGAP006898	Cht6	chitinase [Source:VB Community Annotation]	7.21099e-07	1.48201	0.462	0.059	0.00946874	C_1
AGAP013465	CPLCP1	cuticular protein (putative) CPLCP1 [Source:VB Community Annotation]	2.77486e-06	1.67312	0.385	0.046	0.0364367	C_1
AGAP006840	CPR136	cuticular protein RR-1 family 136 [Source:VB Community Annotation]	6.57927e-07	2.92712	0.385	0.046	0.00863923	C_1
AGAP003385	CPR123	cuticular protein RR-2 family 123 [Source:VB Community Annotation]	5.86241e-08	2.3298	0.385	0.033	0.000769793	C_1
AGAP001329	CPLCX1	cuticular protein unclassified [Source:VB Community Annotation]	2.01886e-06	2.06662	0.385	0.046	0.0265096	C_1
AGAP012296	CYP9J5	cytochrome P450 [Source:VB Community Annotation]	5.10897e-08	2.14687	0.462	0.05	0.000670859	C_1
AGAP002205	CYP325C2	cytochrome P450 [Source:VB Community Annotation]	1.16226e-08	1.71009	0.692	0.1	0.000152617	C_1
AGAP003070		disintegrin and metalloproteinase domain-containing protein 10 [Source:VB Community Annotation]	1.99224e-06	1.10522	0.692	0.146	0.0261601	C_1
AGAP005955		E3 ubiquitin-protein ligase MUL1 [Source:VB Community Annotation]	9.97356e-07	1.4805	0.538	0.079	0.0130963	C_1
AGAP003611		Fatty acyl-CoA reductase [Source:UniProtKB/TrEMBL%3BAcc:Q7QAN3]	1.68029e-06	2.0709	0.385	0.046	0.0220639	C_1
AGAP003606		Fatty acyl-CoA reductase [Source:UniProtKB/TrEMBL%3BAcc:Q7QAN6]	1.7465e-06	2.07951	0.538	0.092	0.0229333	C_1
AGAP028679		F-box/leucine rich repeat protein	1.3333e-06	2.12929	0.385	0.046	0.0175075	C_1
AGAP006222		glucosyl/glucuronosyl transferases [Source:VB Community Annotation]	5.32121e-07	1.91752	0.538	0.084	0.00698728	C_1
AGAP002635	Gr13	gustatory receptor 13 [Source:VB Community Annotation]	1.17791e-06	1.46685	0.385	0.042	0.0154671	C_1
AGAP001123	Gr36	gustatory receptor 36 [Source:VB Community Annotation]	5.246e-07	1.88729	0.615	0.109	0.00688853	C_1
AGAP001169	Gr49	gustatory receptor 49 [Source:VB Community Annotation]	1.21647e-08	2.28597	0.615	0.088	0.000159734	C_1
AGAP006266		HIV Tat-specific factor 1 [Source:VB Community Annotation]	3.71025e-06	1.42437	0.615	0.113	0.0487193	C_1
AGAP006923		homeobox protein GBX [Source:VB Community Annotation]	2.26384e-06	1.70894	0.462	0.067	0.0297265	C_1
AGAP011968	IR76b	ionotropic receptor IR76b [Source:VB Community Annotation]	6.26034e-09	2.24838	0.538	0.063	8.22046e-05	C_1
AGAP013124		juvenile hormone-inducible protein [Source:VB Community Annotation]	1.76679e-07	2.41119	0.462	0.059	0.00231997	C_1
AGAP008258		lactosylceramide 4-alpha-galactosyltransferase [Source:VB Community Annotation]	8.20225e-08	1.82727	0.538	0.071	0.00107704	C_1
AGAP006444		low density lipoprotein receptor-related protein-like protein [Source:VB Community Annotation]	1.70637e-06	1.22717	0.615	0.105	0.0224063	C_1
AGAP002482		lysophosphatidylglycerol acyltransferase 1 [Source:VB Community Annotation]	3.25843e-06	1.53202	0.538	0.092	0.0427865	C_1
AGAP012399		maltase [Source:VB Community Annotation]	2.82791e-06	1.46846	0.846	0.213	0.0371332	C_1
AGAP002634		membrane dipeptidase [Source:VB Community Annotation]	4.48129e-07	1.72636	0.462	0.059	0.00588438	C_1
AGAP003602		methyltransferase-like protein 9 [Source:VB Community Annotation]	3.13178e-06	1.22367	0.692	0.142	0.0411234	C_1
AGAP006878		mitochondrial complex I protein Fmp36 [Source:VB Community Annotation]	4.93279e-07	2.11541	0.538	0.084	0.00647724	C_1
AGAP028049		polyketide synthases (PKSs) polymerize simple fatty acids into a large variety of different products	1.54304e-07	0.977145	0.769	0.142	0.00202617	C_1
AGAP000844		Progestin and adipoQ receptor family member 4 [Source:VB Community Annotation]	1.65476e-06	1.89048	0.615	0.126	0.0217287	C_1
AGAP006045		protein yorkie [Source:VB Community Annotation]	2.38214e-06	1.57463	0.615	0.113	0.0312799	C_1
AGAP011810		Retinol dehydrogenase 12 (all-trans/9-cis/11-cis) [Source:VB Community Annotation]	3.58181e-09	2.31804	0.462	0.042	4.70328e-05	C_1
AGAP005742		semaphorin [Source:VB Community Annotation]	5.58261e-10	2.64206	0.538	0.054	7.33053e-06	C_1
AGAP009683		sidestep protein [Source:VB Community Annotation]	1.33737e-06	1.5522	0.692	0.13	0.0175609	C_1
AGAP028613		solute carrier family 7 (cationic amino acid transporter%2C y+ system) [Source:VB Community Annotation]	3.11255e-08	2.08911	0.462	0.05	0.000408709	C_1
AGAP007066		tRNA-specific adenosine deaminase 3 [Source:VB Community Annotation]	6.23123e-07	1.86022	0.692	0.142	0.00818222	C_1
AGAP010545		Trypsin-like serine protease	9.72204e-08	1.68918	0.615	0.092	0.0012766	C_1
AGAP010073		type II pantothenate kinase [Source:VB Community Annotation]	5.95965e-07	1.73757	0.538	0.084	0.00782561	C_1
AGAP004634		Unknown	3.51763e-09	2.65553	0.538	0.063	4.61899e-05	C_1
AGAP004474		Unknown	1.00738e-06	2.43535	0.385	0.046	0.013228	C_1
AGAP001620		Unknown	2.64241e-07	2.36795	0.462	0.059	0.00346975	C_1
AGAP003386		Unknown	1.46014e-07	2.2608	0.538	0.075	0.00191732	C_1
AGAP028571		Unknown	5.95377e-07	2.26043	0.385	0.042	0.00781789	C_1
AGAP010995		Unknown	6.25468e-07	2.24775	0.385	0.042	0.00821303	C_1
AGAP001483		Unknown	3.0261e-06	2.23651	0.462	0.071	0.0397357	C_1
AGAP013074		Unknown	1.84212e-06	2.23361	0.385	0.046	0.0241888	C_1
AGAP013772		Unknown	5.66683e-07	2.23277	0.385	0.042	0.00744112	C_1
AGAP006024		Unknown	6.57023e-07	2.23019	0.385	0.042	0.00862737	C_1
AGAP009940		Unknown	2.22749e-06	2.2189	0.462	0.071	0.0292492	C_1
AGAP006465		Unknown	1.92854e-06	2.21529	0.385	0.046	0.0253237	C_1
AGAP028167		Unknown	1.58176e-08	2.2004	0.462	0.046	0.000207702	C_1
AGAP003920		Unknown	1.53218e-06	2.19252	0.385	0.046	0.020119	C_1
AGAP028522		Unknown	1.3333e-06	2.14367	0.385	0.046	0.0175075	C_1
AGAP010795		Unknown	9.31485e-08	2.09175	0.538	0.071	0.00122313	C_1
AGAP008732		Unknown	7.99283e-07	2.0892	0.385	0.042	0.0104954	C_1
AGAP010360		Unknown	1.50615e-07	2.07482	0.692	0.13	0.00197772	C_1
AGAP003349		Unknown	9.48013e-09	2.04947	0.615	0.084	0.000124484	C_1
AGAP013009		Unknown	6.90109e-07	1.99874	0.385	0.042	0.00906183	C_1
AGAP011023		Unknown	1.06964e-06	1.97105	0.385	0.042	0.0140454	C_1
AGAP010628		Unknown	1.51728e-06	1.95938	0.615	0.113	0.0199234	C_1
AGAP008192		Unknown	2.42245e-06	1.92867	0.385	0.046	0.0318092	C_1
AGAP013469		Unknown	2.48802e-07	1.92757	0.538	0.079	0.00326702	C_1
AGAP028445		Unknown	4.86359e-08	1.88893	0.462	0.05	0.000638639	C_1
AGAP002276		Unknown	1.58893e-09	1.88161	0.538	0.054	2.08642e-05	C_1
AGAP004323		Unknown	1.46014e-07	1.87599	0.538	0.075	0.00191732	C_1
AGAP007269		Unknown	9.6319e-07	1.86042	0.462	0.063	0.0126476	C_1
AGAP004931		Unknown	2.75323e-06	1.84587	0.462	0.067	0.0361526	C_1
AGAP004454		Unknown	2.65333e-07	1.8177	0.462	0.054	0.00348409	C_1
AGAP002678		Unknown	2.01715e-07	1.79616	0.462	0.054	0.00264872	C_1
AGAP028115		Unknown	1.93361e-06	1.76182	0.462	0.067	0.0253902	C_1
AGAP004841		Unknown	6.19237e-08	1.75845	0.692	0.126	0.00081312	C_1
AGAP005146		Unknown	1.50005e-07	1.68912	0.615	0.096	0.00196971	C_1
AGAP007783		Unknown	8.33915e-08	1.68311	0.615	0.092	0.00109501	C_1
AGAP007877		Unknown	2.88824e-06	1.63349	0.615	0.126	0.0379255	C_1
AGAP028716		Unknown	7.5363e-09	1.61698	0.615	0.079	9.89591e-05	C_1
AGAP011087		Unknown	2.89376e-08	1.61614	0.692	0.113	0.000379979	C_1
AGAP008559		Unknown	3.79924e-07	1.58029	0.769	0.163	0.00498878	C_1
AGAP006370		Unknown	6.57303e-07	1.53432	0.538	0.079	0.00863105	C_1
AGAP013144		Unknown	8.41986e-07	1.49725	0.615	0.105	0.0110561	C_1
AGAP002998		Unknown	2.36666e-06	1.47437	0.538	0.088	0.0310766	C_1
AGAP002199		Unknown	1.79064e-07	1.45552	0.538	0.075	0.00235129	C_1
AGAP003854		Unknown	2.53903e-06	1.39951	0.538	0.088	0.03334	C_1
AGAP007792		Unknown	1.83308e-06	1.36864	0.769	0.172	0.0240702	C_1
AGAP028710		Unknown	1.48595e-06	1.34269	0.615	0.109	0.019512	C_1
AGAP007074		Unknown	3.57126e-06	1.33834	0.692	0.151	0.0468942	C_1
AGAP012403		Unknown	1.43777e-06	1.32953	0.615	0.109	0.0188794	C_1
AGAP009268		Unknown	7.85556e-07	1.07348	0.462	0.059	0.0103151	C_1
AGAP007138		Wurst [Source:VB Community Annotation]	2.52751e-07	2.14881	0.462	0.059	0.00331888	C_1
AGAP005941			2.99954e-07	3.04735	0.308	0.025	0.0039387	C_1
AGAP002102			5.69699e-12	3.0379	0.308	0.008	7.48071e-08	C_1
AGAP008459			3.88609e-10	3.00751	0.308	0.013	5.10282e-06	C_1
AGAP006844			1.33698e-06	3.00723	0.308	0.029	0.0175559	C_1
AGAP011259			1.39868e-06	2.83434	0.154	0.004	0.018366	C_1
AGAP008460			3.82904e-07	2.82738	0.308	0.025	0.00502791	C_1
AGAP009879			7.17156e-12	2.80748	0.385	0.017	9.41698e-08	C_1
AGAP010997			7.94667e-09	2.78371	0.308	0.017	0.000104348	C_1
AGAP011436			8.61974e-12	2.76308	0.308	0.008	1.13186e-07	C_1
AGAP010468			1.33506e-09	2.75001	0.154	0	1.75307e-05	C_1
AGAP012450			3.88609e-10	2.74169	0.308	0.013	5.10282e-06	C_1
AGAP011490			1.25981e-06	2.70414	0.154	0.004	0.0165426	C_1
AGAP011912			6.81935e-09	2.68945	0.308	0.017	8.95449e-05	C_1
AGAP005354			5.71291e-07	2.68926	0.231	0.013	0.00750162	C_1
AGAP012805			1.5522e-06	2.65444	0.154	0.004	0.020382	C_1
AGAP013413			1.39868e-06	2.64565	0.154	0.004	0.018366	C_1
AGAP001637			6.13585e-09	2.61757	0.385	0.029	8.05698e-05	C_1
AGAP010531			6.96212e-09	2.61498	0.385	0.029	9.14196e-05	C_1
AGAP008380			7.29692e-08	2.55658	0.308	0.021	0.000958159	C_1
AGAP007270			2.93501e-08	2.53902	0.385	0.033	0.000385396	C_1
AGAP013245			6.5363e-09	2.52657	0.385	0.029	8.58281e-05	C_1
AGAP006523			3.88609e-10	2.50979	0.308	0.013	5.10282e-06	C_1
AGAP006495			2.63541e-08	2.50719	0.231	0.008	0.000346055	C_1
AGAP012886			1.33506e-09	2.50054	0.154	0	1.75307e-05	C_1
AGAP011683			8.35004e-08	2.49461	0.308	0.021	0.00109644	C_1
AGAP009573			1.86105e-06	2.43642	0.308	0.029	0.0244375	C_1
AGAP011014			2.89114e-08	2.41955	0.231	0.008	0.000379636	C_1
AGAP006716			5.71291e-07	2.41116	0.231	0.013	0.00750162	C_1
AGAP009090			8.35004e-08	2.41051	0.308	0.021	0.00109644	C_1
AGAP013297			5.71291e-07	2.39763	0.231	0.013	0.00750162	C_1
AGAP013448			1.82274e-07	2.39404	0.385	0.038	0.00239344	C_1
AGAP008630			6.65782e-07	2.38356	0.231	0.013	0.00874238	C_1
AGAP006759			7.8063e-08	2.38114	0.308	0.021	0.00102505	C_1
AGAP011595			7.75245e-07	2.38043	0.231	0.013	0.0101797	C_1
AGAP012152			1.25981e-06	2.36938	0.154	0.004	0.0165426	C_1
AGAP012540			2.37437e-07	2.32013	0.385	0.038	0.00311779	C_1
AGAP013187			6.25468e-07	2.31767	0.385	0.042	0.00821303	C_1
AGAP000599			5.50122e-07	2.28643	0.308	0.025	0.00722365	C_1
AGAP009361			9.54967e-08	2.27038	0.308	0.021	0.00125397	C_1
AGAP028055			6.20107e-07	2.26586	0.308	0.025	0.00814263	C_1
AGAP012968			3.03226e-06	2.25846	0.308	0.029	0.0398166	C_1
AGAP009501			2.57962e-06	2.25425	0.308	0.029	0.033873	C_1
AGAP011511			1.11239e-09	2.24497	0.385	0.025	1.46069e-05	C_1
AGAP004222			2.19224e-06	2.23968	0.308	0.029	0.0287862	C_1
AGAP008766			7.92766e-11	2.21214	0.538	0.046	1.04098e-06	C_1
AGAP010077			4.15559e-08	2.20048	0.385	0.033	0.00054567	C_1
AGAP006537			5.51732e-10	2.18816	0.308	0.013	7.24479e-06	C_1
AGAP009313			7.18507e-07	2.18066	0.231	0.013	0.00943472	C_1
AGAP003343			2.44372e-06	2.17638	0.308	0.029	0.0320884	C_1
AGAP008686			1.25981e-06	2.17348	0.154	0.004	0.0165426	C_1
AGAP004714			2.87352e-06	2.16884	0.308	0.029	0.0377322	C_1
AGAP009367			7.41409e-07	2.1673	0.308	0.025	0.00973544	C_1
AGAP005047			2.57962e-06	2.16216	0.308	0.029	0.033873	C_1
AGAP028600			7.36206e-09	2.10963	0.308	0.017	9.66711e-05	C_1
AGAP011015			7.75245e-07	2.07907	0.231	0.013	0.0101797	C_1
AGAP028039			1.5522e-06	2.0702	0.154	0.004	0.020382	C_1
AGAP012732			1.5522e-06	2.06312	0.154	0.004	0.020382	C_1
AGAP001809			6.20107e-07	2.02184	0.308	0.025	0.00814263	C_1
AGAP007266			7.86701e-07	2.01503	0.308	0.025	0.0103302	C_1
AGAP002494			5.50122e-07	1.99573	0.308	0.025	0.00722365	C_1
AGAP003672			1.63874e-07	1.9879	0.385	0.038	0.00215183	C_1
AGAP006345			1.33506e-09	1.89709	0.154	0	1.75307e-05	C_1
AGAP006487			1.5522e-06	1.88972	0.154	0.004	0.020382	C_1
AGAP028538			3.19939e-06	1.88468	0.308	0.029	0.0420112	C_1
AGAP002294			5.50122e-07	1.87023	0.308	0.025	0.00722365	C_1
AGAP008836			2.87352e-06	1.84883	0.308	0.029	0.0377322	C_1
AGAP002293			2.57962e-06	1.82725	0.308	0.029	0.033873	C_1
AGAP002583			6.65782e-07	1.79852	0.231	0.013	0.00874238	C_1
AGAP009319			3.37535e-06	1.78265	0.308	0.029	0.0443217	C_1
AGAP011372			6.16794e-07	1.76466	0.231	0.013	0.00809913	C_1
AGAP009146			6.20107e-07	1.76459	0.308	0.025	0.00814263	C_1
AGAP028507			6.65782e-07	1.68656	0.231	0.013	0.00874238	C_1
AGAP002037			1.5522e-06	1.68113	0.154	0.004	0.020382	C_1
AGAP011064			4.87783e-07	1.54579	0.308	0.025	0.00640508	C_1
AGAP028063			2.87352e-06	1.54402	0.308	0.029	0.0377322	C_1
AGAP013298			1.67896e-09	1.49494	0.385	0.025	2.20464e-05	C_1
AGAP002355			1.01916e-06	1.44227	0.385	0.042	0.0133826	C_1
AGAP011444		20S proteasome subunit beta 7 [Source:VB Community Annotation]	2.78801e-06	1.0836	0.952	0.268	0.0366093	C_2
AGAP007243		26S protease regulatory subunit 8 [Source:VB Community Annotation]	6.85168e-07	1.06202	0.905	0.234	0.00899694	C_2
AGAP005559		26S proteasome regulatory subunit N10 [Source:VB Community Annotation]	7.2373e-08	1.22378	0.81	0.203	0.00095033	C_2
AGAP012135		26S proteasome regulatory subunit N8 [Source:VB Community Annotation]	3.49561e-06	0.808322	0.905	0.251	0.0459009	C_2
AGAP001651		26S proteasome regulatory subunit N9 [Source:VB Community Annotation]	3.83683e-07	1.40288	0.667	0.147	0.00503815	C_2
AGAP001745		26S proteasome regulatory subunit RPN2 [Source:VB Community Annotation]	9.68959e-11	1.76496	0.857	0.177	1.27234e-06	C_2
AGAP003215		26S proteasome regulatory subunit T2 [Source:VB Community Annotation]	3.94356e-07	1.02506	0.714	0.16	0.00517829	C_2
AGAP003216		26S proteasome regulatory subunit T2 [Source:VB Community Annotation]	3.14644e-06	1.01311	0.857	0.247	0.041316	C_2
AGAP003008		26S proteasome regulatory subunit T3 [Source:VB Community Annotation]	7.1323e-07	0.969833	0.905	0.277	0.00936542	C_2
AGAP001998	mRpS10	28S ribosomal protein S10%2C mitochondrial [Source:VB Community Annotation]	1.04335e-06	0.975251	0.762	0.186	0.0137003	C_2
AGAP007519	mRpS22	28S ribosomal protein S22%2C mitochondrial [Source:VB Community Annotation]	1.0146e-06	1.28679	0.429	0.069	0.0133227	C_2
AGAP012136	mRpS25	28S ribosomal protein S25%2C mitochondrial [Source:VB Community Annotation]	9.8949e-07	1.34583	0.571	0.121	0.012993	C_2
AGAP004481	mRpS26	28S ribosomal protein S26%2C mitochondrial [Source:VB Community Annotation]	6.52913e-08	1.48147	0.571	0.1	0.000857341	C_2
AGAP011803	mRpS27	28S ribosomal protein S27%2C mitochondrial [Source:VB Community Annotation]	1.79563e-06	1.17976	0.619	0.156	0.0235784	C_2
AGAP011931	mRpS31	28S ribosomal protein S31%2C mitochondrial [Source:VB Community Annotation]	8.5597e-07	1.22812	0.429	0.074	0.0112397	C_2
AGAP010268	mRpS9	28S ribosomal protein S9%2C mitochondrial [Source:VB Community Annotation]	2.96646e-07	1.33652	0.667	0.156	0.00389526	C_2
AGAP003136		2-oxoisovalerate dehydrogenase E1 component%2C alpha subunit [Source:VB Community Annotation]	1.1133e-06	1.06034	0.667	0.165	0.0146187	C_2
AGAP001549		3'-5' exonuclease	3.8267e-07	1.50051	0.571	0.117	0.00502484	C_2
AGAP001738	mRpL1	39S ribosomal protein L1%2C mitochondrial [Source:VB Community Annotation]	9.48651e-07	1.42371	0.619	0.143	0.0124567	C_2
AGAP011581	mRpL12	39S ribosomal protein L12%2C mitochondrial [Source:VB Community Annotation]	1.83032e-06	1.0733	0.905	0.26	0.0240339	C_2
AGAP004985	mRpL16	39S ribosomal protein L16%2C mitochondrial [Source:VB Community Annotation]	3.32915e-06	1.0186	0.667	0.165	0.043715	C_2
AGAP004709	mRpL18	39S ribosomal protein L18%2C mitochondrial [Source:VB Community Annotation]	5.37735e-09	1.47434	0.714	0.134	7.06099e-05	C_2
AGAP010450	mRpL2	39S ribosomal protein L2%2C mitochondrial [Source:VB Community Annotation]	2.20983e-07	1.3078	0.571	0.113	0.00290172	C_2
AGAP012030	mRpL21	39S ribosomal protein L21%2C mitochondrial [Source:VB Community Annotation]	5.17252e-08	1.12641	0.571	0.1	0.000679203	C_2
AGAP010338	mRpL23	39S ribosomal protein L23%2C mitochondrial [Source:VB Community Annotation]	1.50301e-09	1.12733	0.857	0.169	1.9736e-05	C_2
AGAP008405	mRpL24	39S ribosomal protein L24%2C mitochondrial [Source:VB Community Annotation]	9.04892e-09	1.75863	0.571	0.095	0.000118821	C_2
AGAP000857	mRpL3	39S ribosomal protein L3%2C mitochondrial [Source:VB Community Annotation]	1.99406e-07	1.21643	0.714	0.16	0.0026184	C_2
AGAP002917	mRpL34	39S ribosomal protein L34%2C mitochondrial [Source:VB Community Annotation]	1.13164e-08	1.31854	0.714	0.134	0.000148595	C_2
AGAP007937	mRpL4	39S ribosomal protein L4%2C mitochondrial [Source:VB Community Annotation]	3.6482e-06	0.937388	0.714	0.19	0.0479045	C_2
AGAP000110	mRpL40	39S ribosomal protein L40%2C mitochondrial [Source:VB Community Annotation]	1.72326e-07	1.39905	0.619	0.126	0.00226282	C_2
AGAP002713	mRpL49	39S ribosomal protein L49%2C mitochondrial [Source:VB Community Annotation]	4.42104e-08	1.25227	0.81	0.182	0.000580527	C_2
AGAP003770	mRpL51	39S ribosomal protein L51%2C mitochondrial [Source:VB Community Annotation]	1.31504e-07	0.752151	0.81	0.19	0.00172678	C_2
AGAP011716	mRpL53	39S ribosomal protein L53%2C mitochondrial [Source:VB Community Annotation]	4.13841e-07	1.41941	0.571	0.117	0.00543415	C_2
AGAP006916	mRpL54	39S ribosomal protein L54%2C mitochondrial [Source:VB Community Annotation]	6.44819e-07	1.55333	0.571	0.121	0.00846712	C_2
AGAP003414		3-hydroxyacyl-CoA dehydrogenase / 3-hydroxy-2-methylbutyryl-CoA dehydrogenase [Source:VB Community Annotation]	7.35417e-07	1.50772	0.429	0.074	0.00965676	C_2
AGAP004097		3-hydroxyisobutyryl-CoA hydrolase%2C mitochondrial [Source:UniProtKB/TrEMBL%3BAcc:Q7PH36]	1.4145e-06	1.14725	0.476	0.091	0.0185738	C_2
AGAP005129		5'-methylthioadenosine phosphorylase [Source:VB Community Annotation]	1.48564e-07	1.33985	0.81	0.203	0.00195079	C_2
AGAP001311	mRpL20	60S ribosomal protein L20 [Source:VB Community Annotation]	2.38055e-06	0.987112	0.81	0.216	0.031259	C_2
AGAP004197		6-phosphogluconate dehydrogenase%2C decarboxylating [Source:UniProtKB/TrEMBL%3BAcc:Q7PQM3]	4.73246e-07	0.927557	0.857	0.229	0.0062142	C_2
AGAP008730		6-pyruvoyltetrahydropterin/6-carboxytetrahydropterin synthase [Source:VB Community Annotation]	5.02204e-07	1.4246	0.667	0.169	0.00659444	C_2
AGAP000784		abhydrolase domain containing 4 [Source:VB Community Annotation]	3.30649e-07	1.22466	0.762	0.208	0.00434175	C_2
AGAP001318		acetyl-CoA C-acetyltransferase [Source:VB Community Annotation]	7.5034e-09	1.35024	0.571	0.095	9.85271e-05	C_2
AGAP002387		acid phosphatase [Source:VB Community Annotation]	5.95728e-07	1.52046	0.619	0.139	0.0078225	C_2
AGAP007258		aconitate hydratase 1 / homoaconitase [Source:VB Community Annotation]	3.09589e-07	1.11171	0.81	0.221	0.00406522	C_2
AGAP001712		actin related protein 2/3 complex%2C subunit 3 [Source:VB Community Annotation]	1.08151e-07	1.1576	0.952	0.251	0.00142013	C_2
AGAP008895		actin related protein 2/3 complex%2C subunit 5 [Source:VB Community Annotation]	2.34542e-06	1.13297	0.81	0.229	0.0307977	C_2
AGAP008687		actin-like protein 6B [Source:VB Community Annotation]	8.04553e-07	1.32933	0.714	0.182	0.0105646	C_2
AGAP005857		actin-related protein 6 [Source:VB Community Annotation]	7.54409e-08	1.38721	0.571	0.104	0.000990614	C_2
AGAP005825		acylglycerol kinase [Source:VB Community Annotation]	6.25061e-10	1.8058	0.524	0.074	8.20768e-06	C_2
AGAP012883		acyl-protein thioesterase 1%2C2 [Source:VB Community Annotation]	7.62113e-08	2.08132	0.333	0.035	0.00100073	C_2
AGAP000322		Adaptin ear-binding coat-associated protein 1 [Source:VB Community Annotation]	9.19349e-07	1.17826	0.81	0.225	0.012072	C_2
AGAP000161		Adaptor-related protein complex 3%2C delta 1 subunit [Source:VB Community Annotation]	1.23113e-07	1.16263	0.714	0.165	0.0016166	C_2
AGAP007522		Adaptor-related protein complex 3%2C sigma 1 subunit [Source:VB Community Annotation]	2.44864e-14	1.9269	0.857	0.121	3.21531e-10	C_2
AGAP005723		adenine phosphoribosyltransferase [Source:VB Community Annotation]	1.35269e-07	1.12894	0.857	0.216	0.00177622	C_2
AGAP010137		adenosine kinase [Source:VB Community Annotation]	1.22154e-09	2.18732	0.429	0.048	1.604e-05	C_2
AGAP003002		AdoMet-dependent rRNA methyltransferase [Source:VB Community Annotation]	4.90285e-08	1.47761	0.857	0.251	0.000643794	C_2
AGAP011730		ADP-ribosylation factor-like protein 1 [Source:VB Community Annotation]	1.51333e-08	1.16693	0.857	0.203	0.000198715	C_2
AGAP006949		AFG3 family protein [Source:VB Community Annotation]	2.28738e-06	1.51177	0.524	0.117	0.0300355	C_2
AGAP001888		Alpha-(1%2C6)-fucosyltransferase [Source:UniProtKB/TrEMBL%3BAcc:Q7PYD8]	1.66986e-08	1.77378	0.524	0.082	0.000219269	C_2
AGAP000365		alpha-1%2C3-fucosyltransferase [Source:VB Community Annotation]	3.1732e-07	1.23911	0.81	0.195	0.00416673	C_2
AGAP008946		Alpha-1%2C3-glucosyltransferase [Source:UniProtKB/TrEMBL%3BAcc:Q5TNL1]	5.36765e-09	1.70933	0.571	0.091	7.04826e-05	C_2
AGAP007168		alpha-1%2C3-mannosyltransferase [Source:VB Community Annotation]	2.12405e-07	1.74569	0.429	0.065	0.00278908	C_2
AGAP000102		alpha-1%2C6-mannosyltransferase [Source:VB Community Annotation]	5.28805e-07	1.41207	0.619	0.16	0.00694373	C_2
AGAP002127		alpha-centractin [Source:VB Community Annotation]	1.53681e-06	1.47528	0.667	0.182	0.0201799	C_2
AGAP004020		alpha-mannosidase II [Source:VB Community Annotation]	5.61298e-08	1.42144	0.762	0.195	0.000737041	C_2
AGAP010586		aminoacyl tRNA synthase complex-interacting multifunctional protein 1 [Source:VB Community Annotation]	2.01803e-07	1.14888	0.81	0.19	0.00264987	C_2
AGAP005418		aminoacyl tRNA synthase complex-interacting multifunctional protein 2 [Source:VB Community Annotation]	9.08313e-07	1.33704	0.762	0.195	0.0119271	C_2
AGAP004933		ankyrin repeat and MYND domain-containing protein 2 [Source:VB Community Annotation]	1.12243e-08	1.53424	0.667	0.121	0.000147386	C_2
AGAP007813		ankyrin repeat domain-containing protein 49 [Source:VB Community Annotation]	4.29936e-13	1.95465	0.619	0.069	5.64549e-09	C_2
AGAP009816		anterior pharynx defective 1 [Source:VB Community Annotation]	1.47908e-10	1.49985	0.81	0.143	1.94217e-06	C_2
AGAP009587		AP endonuclease 1 [Source:VB Community Annotation]	1.61645e-08	1.43101	0.714	0.147	0.000212256	C_2
AGAP001484		AP-3 complex subunit mu [Source:VB Community Annotation]	2.5134e-08	1.48965	0.714	0.152	0.000330034	C_2
AGAP001976		Archease [Source:VB Community Annotation]	4.35333e-10	1.70278	0.571	0.078	5.71636e-06	C_2
AGAP004708		arginyl-tRNA synthetase [Source:VB Community Annotation]	1.18137e-06	1.22456	0.762	0.216	0.0155126	C_2
AGAP001894		arrestin domain-containing protein 3 [Source:VB Community Annotation]	1.48489e-08	1.32994	0.667	0.126	0.000194981	C_2
AGAP005782	ASNA1	arsenical pump-driving ATPase [Source:VB Community Annotation]	1.56115e-07	1.33702	0.619	0.121	0.00204995	C_2
AGAP000554		ASC-1 homology domain; Putative zinc finger motif	1.19622e-08	1.31086	0.571	0.095	0.000157076	C_2
AGAP002969		asparaginyl-tRNA synthetase [Source:VB Community Annotation]	1.75742e-08	1.33656	0.952	0.255	0.000230767	C_2
AGAP004142		aspartate aminotransferase%2C cytoplasmic [Source:VB Community Annotation]	2.5732e-07	1.08994	0.952	0.273	0.00337886	C_2
AGAP011164		Associate of Myc 1	4.74764e-07	1.62859	0.381	0.056	0.00623413	C_2
AGAP012124		asterix	2.91531e-07	1.23039	0.762	0.182	0.00382809	C_2
AGAP004478		ATP synthase subunit s%2C mitochondrial precursor [Source:VB Community Annotation]	8.14856e-18	2.79919	0.667	0.052	1.06999e-13	C_2
AGAP011983		ATP-dependent (S)-NAD(P)H-hydrate dehydratase [Source:UniProtKB/TrEMBL%3BAcc:A0A1S4H960]	2.12562e-09	2.01048	0.333	0.026	2.79115e-05	C_2
AGAP011084		ATP-dependent RNA helicase DDX27 [Source:VB Community Annotation]	2.19992e-07	1.45321	0.667	0.16	0.00288871	C_2
AGAP009808		ATP-dependent RNA helicase DDX47/RRP3 [Source:VB Community Annotation]	3.6415e-06	0.974976	0.714	0.195	0.0478165	C_2
AGAP011147		ATP-dependent RNA helicase DDX56/DBP9 [Source:VB Community Annotation]	1.25868e-07	1.39894	0.619	0.126	0.00165277	C_2
AGAP011145		ATP-dependent RNA helicase DDX56/DBP9 [Source:VB Community Annotation]	4.83696e-07	1.35312	0.571	0.117	0.00635141	C_2
AGAP002829	SPN-E	ATP-dependent RNA helicase spindle-E [Source:VB Community Annotation]	1.08268e-09	1.88356	0.571	0.091	1.42167e-05	C_2
AGAP008637	APG7A	autophagy related gene [Source:VB Community Annotation]	1.36732e-08	1.58904	0.714	0.16	0.000179543	C_2
AGAP000933	APG10	autophagy related gene [Source:VB Community Annotation]	1.29379e-06	1.41528	0.524	0.108	0.0169887	C_2
AGAP009883		Bax inhibitor 1-related	3.62835e-07	1.16783	0.857	0.225	0.00476439	C_2
AGAP002097		beta-1%2C3-galactosyltransferase brn [Source:VB Community Annotation]	2.98426e-11	1.86677	0.667	0.104	3.91863e-07	C_2
AGAP005293		beta-tubulin isotype I [Source:VB Community Annotation]	2.5495e-07	1.38343	0.81	0.264	0.00334775	C_2
AGAP001321		biliverdin IX beta reductase (BVR-B); NADP(H) binding	2.27462e-09	1.32144	0.905	0.203	2.9868e-05	C_2
AGAP008905		Brain protein I3	1.53114e-07	1.18484	0.905	0.247	0.00201054	C_2
AGAP008906		Brefeldin A-inhibited guanine nucleotide-exchange protein [Source:VB Community Annotation]	3.74467e-06	0.966854	0.619	0.169	0.0491712	C_2
AGAP006690		BTB (POZ) domain containing 9 [Source:VB Community Annotation]	3.61399e-09	1.36571	0.81	0.19	4.74553e-05	C_2
AGAP006777		BTB/POZ domain-containing protein 10 [Source:VB Community Annotation]	1.77376e-07	1.24384	0.571	0.108	0.00232912	C_2
AGAP002301		bud site selection protein 31 [Source:VB Community Annotation]	4.94652e-08	1.5471	0.524	0.087	0.000649528	C_2
AGAP011546		calcium channel flower [Source:VB Community Annotation]	1.93906e-06	0.953816	0.905	0.316	0.0254618	C_2
AGAP004631		calcium ion binding	2.00673e-07	1.13132	0.905	0.247	0.00263503	C_2
AGAP010834		calpain-7 [Source:VB Community Annotation]	2.71873e-06	0.744202	0.381	0.061	0.0356997	C_2
AGAP008615		Canopy homolog 2 [Source:VB Community Annotation]	1.30642e-10	1.43379	0.857	0.165	1.71546e-06	C_2
AGAP006141		Capping protein (actin filament) muscle Z-line%2C alpha 1 [Source:VB Community Annotation]	3.01735e-07	0.976435	0.952	0.273	0.00396208	C_2
AGAP013181		carboxypeptidase A [Source:VB Community Annotation]	1.23727e-06	1.29217	0.714	0.19	0.0162466	C_2
AGAP011422		carboxy-terminal domain RNA polymerase II polypeptide A small phosphatase [Source:VB Community Annotation]	9.99275e-09	1.57493	0.667	0.13	0.000131215	C_2
AGAP011413		CCR4-NOT transcription complex subunit 7/8 [Source:VB Community Annotation]	2.12493e-06	1.03069	0.762	0.208	0.0279025	C_2
AGAP005211		CDK5 regulatory subunit-associated protein 1-like 1 [Source:VB Community Annotation]	2.27769e-06	1.33743	0.476	0.095	0.0299083	C_2
AGAP012050		cell differentiation protein RCD1 homolog [Source:VB Community Annotation]	2.04528e-06	1.22838	0.571	0.126	0.0268565	C_2
AGAP005100		charged multivesicular body protein 5 [Source:VB Community Annotation]	1.94531e-07	0.976932	0.81	0.212	0.00255438	C_2
AGAP008124		chitinase domain-containing protein 1 [Source:VB Community Annotation]	2.8468e-06	1.6171	0.571	0.139	0.0373814	C_2
AGAP003220		CHK kinase-like	3.35218e-07	1.14361	0.952	0.251	0.00440174	C_2
AGAP004723		chromobox protein homolog 1 [Source:VB Community Annotation]	3.99096e-09	1.86306	0.571	0.095	5.24053e-05	C_2
AGAP001648	CLIPB17	CLIP-domain serine protease [Source:VB Community Annotation]	2.12136e-08	1.31722	1	0.294	0.000278555	C_2
AGAP010251		coatomer protein complex%2C subunit alpha (xenin) [Source:VB Community Annotation]	5.62857e-07	1.02599	0.857	0.268	0.00739087	C_2
AGAP011801		Coiled-coil domain-containing protein 22 homolog [Source:UniProtKB/Swiss-Prot%3BAcc:Q7PZ96]	1.84644e-06	1.61019	0.524	0.113	0.0242456	C_2
AGAP003621		coiled-coil domain-containing protein 25 [Source:VB Community Annotation]	3.17326e-06	1.77184	0.286	0.035	0.0416681	C_2
AGAP005883		coiled-coil domain-containing protein 6 [Source:VB Community Annotation]	1.39487e-06	1.44569	0.333	0.043	0.018316	C_2
AGAP002406		COMM domain-containing protein 2 [Source:VB Community Annotation]	2.50895e-08	1.26139	0.667	0.126	0.00032945	C_2
AGAP008156		COP9 signalosome complex subunit 6 [Source:VB Community Annotation]	4.03188e-07	1.27351	0.571	0.117	0.00529426	C_2
AGAP008857		COP9 signalosome complex subunit 8 [Source:VB Community Annotation]	1.22851e-06	1.51505	0.524	0.108	0.0161315	C_2
AGAP012028		copper chaperone [Source:VB Community Annotation]	2.90577e-08	1.39031	0.762	0.169	0.000381556	C_2
AGAP006522		Copz1 protein [Source:VB Community Annotation]	5.28948e-07	1.1536	1	0.312	0.00694562	C_2
AGAP001958	CRY1	cryptochrome 1 [Source:VB Community Annotation]	3.58266e-07	1.4102	0.619	0.147	0.0047044	C_2
AGAP009459	cdk1	cyclin-dependent kinase 1 [Source:VB Community Annotation]	1.35236e-08	1.53301	0.571	0.1	0.000177579	C_2
AGAP003061		cysteine and histidine-rich domain-containing protein [Source:VB Community Annotation]	7.04461e-09	0.740123	0.524	0.078	9.25028e-05	C_2
AGAP007968		cysteine-rich with EGF-like domain protein 2 [Source:VB Community Annotation]	6.61985e-07	1.3045	0.667	0.16	0.00869253	C_2
AGAP012283		cysteinyl-tRNA synthetase [Source:VB Community Annotation]	2.25081e-07	1.61929	0.619	0.147	0.00295554	C_2
AGAP000680		CYTH-like domain	1.77376e-07	1.44026	0.571	0.108	0.00232912	C_2
AGAP007121		cytochrome b5 protein [Source:VB Community Annotation]	5.71283e-07	0.982764	0.952	0.307	0.00750151	C_2
AGAP001744		cytochrome c oxidase assembly protein subunit 15 [Source:VB Community Annotation]	3.6696e-06	1.42718	0.333	0.048	0.0481855	C_2
AGAP003869		cytosol aminopeptidase [Source:VB Community Annotation]	6.16617e-07	1.08534	0.857	0.247	0.00809679	C_2
AGAP010873		Cytosolic Fe-S cluster assembly factor NUBP2 homolog [Source:UniProtKB/Swiss-Prot%3BAcc:Q7QGS3]	2.8707e-08	0.756304	0.714	0.147	0.000376952	C_2
AGAP008849		D-3-phosphoglycerate dehydrogenase [Source:VB Community Annotation]	2.76128e-08	1.10876	0.81	0.199	0.000362583	C_2
AGAP013398		DDRGK domain-containing protein 1 [Source:VB Community Annotation]	3.6749e-08	1.23427	0.857	0.199	0.000482551	C_2
AGAP006125		Density-regulated protein [Source:UniProtKB/TrEMBL%3BAcc:Q7Q5Z2]	4.21445e-08	1.18163	0.905	0.212	0.0005534	C_2
AGAP001585		deoxynucleoside kinase [Source:VB Community Annotation]	1.45253e-09	1.72758	0.619	0.104	1.90731e-05	C_2
AGAP012332		Differentially expressed in FDCP 6-like protein [Source:VB Community Annotation]	1.79322e-07	1.09368	0.619	0.13	0.00235468	C_2
AGAP012129		dimethyladenosine transferase 1%2C mitochondrial [Source:VB Community Annotation]	1.27286e-06	1.00663	0.762	0.195	0.016714	C_2
AGAP012819		dipeptidyl-peptidase 3 [Source:VB Community Annotation]	7.66568e-07	1.66019	0.286	0.03	0.0100658	C_2
AGAP004394		dipeptidyl-peptidase III [Source:VB Community Annotation]	1.67879e-08	1.41325	0.762	0.169	0.000220442	C_2
AGAP011288		diphthamide biosynthesis protein 3 [Source:VB Community Annotation]	1.1396e-07	1.25529	0.714	0.152	0.0014964	C_2
AGAP002472		DNA damage-binding protein 1 [Source:VB Community Annotation]	1.14126e-08	1.55429	0.714	0.169	0.000149859	C_2
AGAP004029		DNA excision repair protein ERCC-1 [Source:VB Community Annotation]	1.35326e-08	1.56782	0.571	0.095	0.000177697	C_2
AGAP009222		DNA ligase 1 [Source:VB Community Annotation]	3.56657e-08	1.72932	0.619	0.134	0.000468327	C_2
AGAP007387		DNA methyltransferase 1-associated protein 1 [Source:VB Community Annotation]	4.20772e-08	1.95722	0.476	0.078	0.000552515	C_2
AGAP001929		DNA polymerase alpha subunit A [Source:VB Community Annotation]	2.68064e-06	1.69768	0.381	0.069	0.0351995	C_2
AGAP004615		DNA polymerase epsilon subunit 1 [Source:VB Community Annotation]	1.16658e-07	1.76355	0.429	0.065	0.00153183	C_2
AGAP004965		DNA polymerase epsilon subunit 4 [Source:VB Community Annotation]	9.6987e-07	1.58952	0.333	0.043	0.0127354	C_2
AGAP003676		DNA repair protein RAD50 [Source:VB Community Annotation]	8.9114e-09	2.44211	0.333	0.03	0.000117016	C_2
AGAP004275		DNA replication licensing factor MCM2 [Source:VB Community Annotation]	1.83097e-08	2.21868	0.381	0.043	0.000240425	C_2
AGAP001135		DNA replication licensing factor MCM3 [Source:VB Community Annotation]	7.16665e-09	1.75047	0.476	0.065	9.41053e-05	C_2
AGAP004956		DNA replication licensing factor MCM4 [Source:VB Community Annotation]	9.56158e-08	2.36216	0.429	0.069	0.00125553	C_2
AGAP004408		DNA replication licensing factor MCM5 [Source:VB Community Annotation]	1.75968e-06	1.6189	0.476	0.1	0.0231064	C_2
AGAP010219	Mcm6	DNA replication licensing factor Mcm6 [Source:UniProtKB/Swiss-Prot%3BAcc:Q7Q0Q1]	5.74393e-08	1.90432	0.429	0.061	0.000754235	C_2
AGAP005800		DNA replication licensing factor MCM7 [Source:VB Community Annotation]	2.70151e-06	1.36468	0.333	0.048	0.0354736	C_2
AGAP004703		DNA-directed RNA polymerase III subunit RPC1 [Source:VB Community Annotation]	6.92105e-07	0.893533	0.857	0.234	0.00908803	C_2
AGAP005922		DNA-directed RNA polymerase III subunit RPC5 [Source:VB Community Annotation]	5.81993e-07	1.92771	0.381	0.056	0.00764215	C_2
AGAP008771		DNA-directed RNA polymerases I and III subunit RPAC1 [Source:VB Community Annotation]	2.8624e-06	1.28611	0.476	0.091	0.0375862	C_2
AGAP002752		DnaJ (Hsp40) homolog%2C subfamily C%2C member 3 [Source:VB Community Annotation]	1.98811e-07	1.39069	0.81	0.212	0.00261059	C_2
AGAP003533		DnaJ homolog subfamily C member 19 [Source:VB Community Annotation]	3.19675e-06	1.08094	0.81	0.229	0.0419766	C_2
AGAP000261		DnaJ-like protein subfamily C [Source:VB Community Annotation]	3.69473e-07	0.925323	0.714	0.173	0.00485155	C_2
AGAP002396		dolichyl-diphosphooligosaccharide--protein glycosyltransferase [Source:VB Community Annotation]	4.01532e-08	1.3866	1	0.329	0.000527252	C_2
AGAP002333		Domain of unknown function (DUF947)	8.51112e-09	1.72606	0.619	0.113	0.000111759	C_2
AGAP005260		dTMP kinase [Source:VB Community Annotation]	7.78102e-10	1.57173	0.762	0.147	1.02173e-05	C_2
AGAP002764		DUF1487	1.00975e-11	2.01046	0.762	0.126	1.3259e-07	C_2
AGAP008757		DUF2053	1.25109e-06	1.20605	0.857	0.242	0.0164281	C_2
AGAP005882		DUF292	7.96523e-08	1.36113	0.714	0.16	0.00104591	C_2
AGAP003614		DUF788, TMEM208	1.36709e-10	1.62588	0.952	0.203	1.79513e-06	C_2
AGAP010159		dUTP pyrophosphatase [Source:VB Community Annotation]	5.86123e-07	1.1277	0.81	0.225	0.00769638	C_2
AGAP006193		E3 ligase	4.23749e-08	1.66404	0.571	0.108	0.000556425	C_2
AGAP001780		E3 ubiquitin-protein ligase EDD1 [Source:VB Community Annotation]	1.20732e-07	0.66423	0.667	0.143	0.00158533	C_2
AGAP000339		E3 ubiquitin-protein ligase Hakai [Source:VB Community Annotation]	2.82233e-11	2.06281	0.524	0.056	3.706e-07	C_2
AGAP003133		E3 ubiquitin-protein ligase NEDD4 [Source:VB Community Annotation]	2.09632e-06	1.12734	0.714	0.195	0.0275268	C_2
AGAP002073		E3 ubiquitin-protein ligase RNF1/2 [Source:VB Community Annotation]	2.70185e-08	1.44458	0.524	0.082	0.00035478	C_2
AGAP004653		electron transfer flavoprotein subunit beta%2C mitochondrial [Source:VB Community Annotation]	1.6905e-06	1.06105	1	0.333	0.022198	C_2
AGAP012061		ELL-associated factor [Source:VB Community Annotation]	3.05405e-06	2.06138	0.286	0.035	0.0401027	C_2
AGAP004372		elongation of very long chain fatty acids protein 1 [Source:VB Community Annotation]	2.43126e-06	1.23516	0.81	0.277	0.0319249	C_2
AGAP009546		endoplasmic reticulum lectin 1 [Source:VB Community Annotation]	3.06551e-06	1.11426	0.762	0.238	0.0402533	C_2
AGAP007784		enoyl-CoA hydratase / long-chain 3-hydroxyacyl-CoA dehydrogenase [Source:VB Community Annotation]	2.60683e-11	1.80362	0.857	0.169	3.42302e-07	C_2
AGAP010403		enoyl-CoA hydratase domain-containing protein 3%2C mitochondrial [Source:VB Community Annotation]	2.53609e-06	1.39602	0.571	0.139	0.0333014	C_2
AGAP012756		ER lumen protein retaining receptor [Source:VB Community Annotation]	6.78719e-07	1.23481	0.667	0.147	0.00891225	C_2
AGAP011346		ER membrane protein complex subunit 10	9.3816e-09	1.57899	0.762	0.156	0.00012319	C_2
AGAP004929		eukaryotic translation elongation factor 1 epsilon-1 [Source:VB Community Annotation]	4.68382e-08	1.30902	0.667	0.126	0.000615033	C_2
AGAP012140	eIF3b	Eukaryotic translation initiation factor 3 subunit B [Source:UniProtKB/Swiss-Prot%3BAcc:Q7PZY1]	3.02752e-06	1.06509	1	0.385	0.0397543	C_2
AGAP009058	Exo3	exocyst complex component 3 [Source:VB Community Annotation]	2.12327e-06	1.725	0.333	0.048	0.0278806	C_2
AGAP011211		exosome complex component RRP4 [Source:VB Community Annotation]	4.41965e-07	1.37035	0.524	0.1	0.00580344	C_2
AGAP002348		exosome complex component RRP45 [Source:VB Community Annotation]	2.52966e-09	1.62405	0.571	0.087	3.32169e-05	C_2
AGAP005191		exosome complex exonuclease DIS3/RRP44 [Source:VB Community Annotation]	2.59153e-08	1.78289	0.571	0.108	0.000340293	C_2
AGAP000394		facilitated glucose transporter (solute carrier family 2) [Source:VB Community Annotation]	3.34133e-08	1.49683	0.619	0.121	0.000438749	C_2
AGAP006817		FACT complex subunit SPT16 [Source:VB Community Annotation]	1.70324e-06	1.13139	0.714	0.195	0.0223653	C_2
AGAP007864		F-actin capping protein subunit beta [Source:VB Community Annotation]	4.75398e-08	1.20168	0.952	0.29	0.000624245	C_2
AGAP007977		Fas-associated factor [Source:VB Community Annotation]	5.45713e-09	1.98671	0.381	0.039	7.16576e-05	C_2
AGAP003719		Ferrochelatase [Source:UniProtKB/TrEMBL%3BAcc:Q7QG25]	2.92485e-07	1.27668	0.619	0.134	0.00384062	C_2
AGAP011448	fen1	Flap endonuclease 1 [Source:UniProtKB/Swiss-Prot%3BAcc:Q7Q323]	6.9816e-10	1.96726	0.619	0.1	9.16754e-06	C_2
AGAP000813		Frataxin homolog%2C mitochondrial [Source:VB Community Annotation]	1.46483e-06	1.12137	0.524	0.104	0.0192347	C_2
AGAP012106		F-type H+-transporting ATPase subunit beta [Source:VB Community Annotation]	3.96696e-09	1.44984	0.905	0.221	5.20901e-05	C_2
AGAP011634		Fumarylacetoacetate hydrolase domain containing 2A [Source:VB Community Annotation]	7.41574e-07	0.97567	0.81	0.234	0.0097376	C_2
AGAP001036		G protein beta subunit-like [Source:VB Community Annotation]	3.78681e-11	1.79589	0.667	0.104	4.97246e-07	C_2
AGAP010447		gamma-glutamylcyclotransferase [Source:VB Community Annotation]	2.1218e-06	1.26099	0.619	0.152	0.0278613	C_2
AGAP006783		GDPmannose 4%2C6-dehydratase [Source:VB Community Annotation]	3.55208e-09	1.37224	0.667	0.121	4.66423e-05	C_2
AGAP000496		geminin [Source:VB Community Annotation]	1.42209e-06	1.30217	0.571	0.126	0.0186735	C_2
AGAP002800		gephyrin [Source:VB Community Annotation]	1.87299e-07	1.45584	0.571	0.117	0.00245942	C_2
AGAP011132		GINS complex subunit 3 [Source:VB Community Annotation]	2.15823e-10	1.90486	0.524	0.065	2.83397e-06	C_2
AGAP009059		Glia maturation factor beta [Source:VB Community Annotation]	3.50451e-06	1.04387	0.81	0.234	0.0460177	C_2
AGAP000432		Glutamate synthase	2.53732e-06	1.35239	0.571	0.126	0.0333176	C_2
AGAP008988		Glutamine synthetase [Source:UniProtKB/TrEMBL%3BAcc:Q7PWF1]	3.07768e-06	1.17357	0.667	0.169	0.040413	C_2
AGAP002570		glutamyl-tRNA synthetase [Source:VB Community Annotation]	6.75892e-07	1.80612	0.286	0.03	0.00887514	C_2
AGAP011299		glycosylphosphatidylinositol deacylase [Source:VB Community Annotation]	4.63662e-08	2.07011	0.476	0.078	0.000608835	C_2
AGAP012208		glycosyltransferase 25 family member [Source:VB Community Annotation]	1.35229e-06	1.26861	0.81	0.234	0.0177569	C_2
AGAP012432		Golgi apparatus membrane protein TVP23 homolog (Fragment) [Source:UniProtKB/TrEMBL%3BAcc:Q7Q901]	3.57194e-06	1.06984	0.762	0.208	0.0469032	C_2
AGAP003415		Grx3p [Source:VB Community Annotation]	4.04109e-08	1.14956	0.667	0.134	0.000530635	C_2
AGAP001902	Rheb	GTP-binding protein Rheb [Source:VB Community Annotation]	2.43084e-06	1.12805	0.667	0.169	0.0319194	C_2
AGAP010292		guanine nucleotide exchange factor VAV [Source:VB Community Annotation]	9.26729e-07	1.39658	0.571	0.13	0.0121689	C_2
AGAP011549		guanine nucleotide-binding protein subunit beta-5	2.31725e-06	1.62611	0.429	0.078	0.0304278	C_2
AGAP010318		guanine nucleotide-binding protein subunit beta-5 [Source:VB Community Annotation]	3.98914e-07	1.17308	0.762	0.182	0.00523815	C_2
AGAP001529		H/ACA ribonucleoprotein complex subunit [Source:UniProtKB/TrEMBL%3BAcc:Q7PXR0]	2.9939e-08	1.32119	0.667	0.13	0.000393129	C_2
AGAP028632	hay	haywire protein DNA repair helicase [Source:VB Community Annotation]	1.42904e-09	1.81686	0.619	0.108	1.87648e-05	C_2
AGAP001424		heat shock protein 90kDa beta [Source:VB Community Annotation]	1.58528e-06	0.93825	1	0.346	0.0208163	C_2
AGAP010537		hexaprenyldihydroxybenzoate methyltransferase [Source:VB Community Annotation]	4.19047e-08	2.02783	0.333	0.035	0.000550251	C_2
AGAP005381		hexosaminidase [Source:VB Community Annotation]	1.56129e-06	1.25463	0.714	0.19	0.0205013	C_2
AGAP000491		HIG1 domain family member 2A [Source:VB Community Annotation]	3.20163e-07	1.13802	0.857	0.221	0.00420407	C_2
AGAP003228		histone acetyltransferase type B subunit 2 [Source:VB Community Annotation]	5.28145e-07	1.18221	0.857	0.251	0.00693507	C_2
AGAP005920		histone chaperone ASF1 [Source:VB Community Annotation]	2.79054e-09	1.38231	0.762	0.152	3.66426e-05	C_2
AGAP012134		HIV-1 Vpr-binding protein [Source:VB Community Annotation]	8.46993e-10	1.22225	0.762	0.147	1.11219e-05	C_2
AGAP004214		HMGI/HMGY	2.54491e-06	0.938123	0.857	0.255	0.0334172	C_2
AGAP001818		homeobox prox 1 [Source:VB Community Annotation]	9.99452e-11	1.61689	0.571	0.074	1.31238e-06	C_2
AGAP007614		HSPC300	2.92944e-06	1.34755	0.619	0.147	0.0384665	C_2
AGAP000416		hydroxyacylglutathione hydrolase [Source:VB Community Annotation]	2.74738e-06	1.12923	0.762	0.199	0.0360758	C_2
AGAP005778		iduronate 2-sulfatase [Source:VB Community Annotation]	2.90896e-09	1.56347	0.619	0.108	3.81976e-05	C_2
AGAP011326	IAP2	inhibitor of apoptosis 2 [Source:VB Community Annotation]	2.31446e-06	1.39195	0.524	0.113	0.0303911	C_2
AGAP008374		Inosine triphosphate pyrophosphatase [Source:UniProtKB/Swiss-Prot%3BAcc:Q7Q4F5]	6.04225e-07	1.39058	0.476	0.087	0.00793408	C_2
AGAP011964		Integrin alpha N-terminal domain superfamily	2.85532e-10	1.48869	1	0.229	3.74932e-06	C_2
AGAP007786		isocitrate dehydrogenase (NAD+) [Source:VB Community Annotation]	1.66909e-06	0.958652	0.762	0.195	0.0219169	C_2
AGAP003168		Isocitrate dehydrogenase [NADP] [Source:UniProtKB/TrEMBL%3BAcc:Q7PQQ3]	3.96426e-07	0.894449	0.762	0.203	0.00520548	C_2
AGAP002101		isoleucyl-tRNA synthetase [Source:VB Community Annotation]	8.99029e-08	1.13813	0.857	0.221	0.00118051	C_2
AGAP001704		isopentenyl-diphosphate delta-isomerase [Source:VB Community Annotation]	1.96248e-06	1.3319	0.571	0.13	0.0257694	C_2
AGAP000099	STAT-A	JAKSTAT pathway signalling transcription factor [Source:VB Community Annotation]	2.50906e-06	0.942577	0.762	0.225	0.0329464	C_2
AGAP005401		karyopherin (Importin) alpha 6 [Source:VB Community Annotation]	1.45667e-06	0.992904	0.762	0.199	0.0191275	C_2
AGAP011938		lamin [Source:VB Community Annotation]	3.40284e-06	1.0351	1	0.346	0.0446827	C_2
AGAP006683		LAMTOR4 family	1.44024e-06	0.710745	0.714	0.169	0.0189118	C_2
AGAP001092		LDLRA	6.19939e-08	1.31796	0.762	0.182	0.000814042	C_2
AGAP004407		lectin%2C mannose-binding 2 [Source:VB Community Annotation]	2.52101e-07	1.34507	0.857	0.247	0.00331034	C_2
AGAP008693		Leptin receptor overlapping transcript-like 1 [Source:VB Community Annotation]	2.80482e-06	1.14412	0.857	0.251	0.0368301	C_2
AGAP003296		LETM1 and EF-hand domain-containing protein 1%2C mitochondrial precursor [Source:VB Community Annotation]	3.54632e-06	1.46964	0.619	0.177	0.0465667	C_2
AGAP007809	AP7862	Leucine aminopeptidase/peptidase B	6.42127e-13	1.90883	0.905	0.156	8.43176e-09	C_2
AGAP005744	LRIM26	leucine-rich immune protein (Coil-less) [Source:VB Community Annotation]	1.82602e-09	1.51492	0.857	0.19	2.39775e-05	C_2
AGAP001491		Leucine-rich repeat-containing protein 57 [Source:VB Community Annotation]	4.42052e-09	1.53897	0.571	0.087	5.80458e-05	C_2
AGAP008297		leucyl-tRNA synthetase [Source:VB Community Annotation]	9.02322e-12	1.58229	0.905	0.186	1.18484e-07	C_2
AGAP001826	Lp	lipophorin [Source:VB Community Annotation]	2.14663e-06	1.05632	0.762	0.247	0.0281874	C_2
AGAP001939		maltase [Source:VB Community Annotation]	3.02213e-08	1.51375	0.619	0.117	0.000396836	C_2
AGAP011723		mannose-1-phosphate guanylyltransferase [Source:VB Community Annotation]	1.01202e-07	1.55855	0.619	0.13	0.00132889	C_2
AGAP001299		mannose-1-phosphate guanylyltransferase [Source:VB Community Annotation]	1.69005e-09	1.24636	0.857	0.177	2.2192e-05	C_2
AGAP008375		mannose-P-dolichol utilization defect 1 [Source:VB Community Annotation]	1.75672e-09	1.69137	0.667	0.117	2.30675e-05	C_2
AGAP003884		mannosyl-oligosaccharide alpha-1%2C2-mannosidase [Source:VB Community Annotation]	3.93209e-07	1.32108	0.619	0.139	0.00516323	C_2
AGAP013741	Med11	mediator of RNA polymerase II transcription subunit 11 [Source:VB Community Annotation]	6.34402e-08	1.34523	0.714	0.156	0.000833034	C_2
AGAP009141	Med17	Mediator of RNA polymerase II transcription subunit 17 [Source:UniProtKB/Swiss-Prot%3BAcc:Q7PVZ2]	6.91928e-07	1.58251	0.429	0.074	0.0090857	C_2
AGAP004191	Med22	Mediator of RNA polymerase II transcription subunit 22 [Source:UniProtKB/Swiss-Prot%3BAcc:Q7QB45]	1.89975e-08	1.7904	0.524	0.082	0.000249456	C_2
AGAP007891		methionyl-tRNA synthetase [Source:VB Community Annotation]	5.87236e-09	1.85979	0.619	0.117	7.711e-05	C_2
AGAP003982		methyl-CpG-binding domain protein 2 [Source:VB Community Annotation]	3.21268e-06	1.72861	0.381	0.065	0.0421857	C_2
AGAP001589		Methylthioribose-1-phosphate isomerase [Source:UniProtKB/Swiss-Prot%3BAcc:Q7PKS9]	3.07684e-08	1.62979	0.571	0.104	0.000404019	C_2
AGAP010234		microsomal triglyceride transfer protein large subunit [Source:VB Community Annotation]	2.83489e-08	1.40364	0.81	0.195	0.000372249	C_2
AGAP005560		microspherule protein 1 [Source:VB Community Annotation]	5.65798e-08	1.4853	0.619	0.126	0.00074295	C_2
AGAP008838		minor histocompatibility antigen H13 [Source:VB Community Annotation]	7.19123e-10	1.38959	0.905	0.212	9.44281e-06	C_2
AGAP005414		misexpression suppressor of ras 6 [Source:VB Community Annotation]	2.00857e-06	1.55762	0.476	0.1	0.0263746	C_2
AGAP003074	SLC25A10	mitochondrial dicarboxylate transporter (solute carrier family 25) [Source:VB Community Annotation]	1.56993e-06	1.14143	0.762	0.216	0.0206147	C_2
AGAP007871		mitochondrial import receptor subunit TOM40 [Source:VB Community Annotation]	3.59906e-06	0.864267	0.905	0.281	0.0472593	C_2
AGAP004657		mitochondrial inner membrane translocase subunit (TIM17) [Source:VB Community Annotation]	2.7014e-06	0.995115	0.762	0.212	0.0354721	C_2
AGAP008499		mitochondrial transcription factor A [Source:VB Community Annotation]	5.85832e-10	1.81434	0.619	0.095	7.69256e-06	C_2
AGAP006996		mitochondrial translation elongation factor TU [Source:VB Community Annotation]	7.07198e-08	1.37428	0.952	0.242	0.000928621	C_2
AGAP012148		Mitogen-activated protein kinase [Source:UniProtKB/TrEMBL%3BAcc:Q7PZY6]	7.18403e-08	1.32483	0.762	0.173	0.000943335	C_2
AGAP000310		mitogen-activated protein kinase kinase 3 [Source:VB Community Annotation]	5.637e-07	1.22395	0.524	0.095	0.00740195	C_2
AGAP007872		Mps one binder kinase activator-like 3 [Source:VB Community Annotation]	4.11573e-10	1.97301	0.524	0.069	5.40437e-06	C_2
AGAP003460		mRNA (guanine-N7-)-methyltransferase [Source:VB Community Annotation]	7.87718e-07	1.59218	0.381	0.056	0.0103435	C_2
AGAP013112		mRNA binding protein [Source:VB Community Annotation]	8.15931e-08	1.58891	0.667	0.152	0.0010714	C_2
AGAP007644		mRNA turnover protein 4 [Source:VB Community Annotation]	1.8297e-06	1.02192	0.857	0.234	0.0240258	C_2
AGAP004990	mbf1	multiprotein bridging factor 1 [Source:VB Community Annotation]	1.10199e-07	0.969955	0.905	0.234	0.00144703	C_2
AGAP008653		NADH dehydrogenase (ubiquinone) 1 alpha subcomplex 12 [Source:VB Community Annotation]	4.91549e-10	1.3736	0.952	0.212	6.45452e-06	C_2
AGAP010792		NADH dehydrogenase (ubiquinone) 1 alpha subcomplex 9 [Source:VB Community Annotation]	3.307e-08	1.16631	1	0.247	0.000434242	C_2
AGAP010039	NADH_dehyd	NADH dehydrogenase (ubiquinone) flavoprotein 1	2.40646e-06	1.20938	0.952	0.268	0.0315992	C_2
AGAP002568		Nat13 protein [Source:VB Community Annotation]	2.52488e-07	1.13625	0.81	0.208	0.00331542	C_2
AGAP010768		NEFA-interacting nuclear protein NIP30 [Source:VB Community Annotation]	8.34667e-07	1.68127	0.476	0.091	0.01096	C_2
AGAP012228		NGG1 interacting factor 3-like protein [Source:VB Community Annotation]	1.51026e-06	1.4437	0.524	0.108	0.0198312	C_2
AGAP002549		nicalin homolog [Source:VB Community Annotation]	5.64276e-08	1.10602	0.905	0.247	0.000740951	C_2
AGAP001734		nicastrin [Source:VB Community Annotation]	1.36583e-08	1.32925	0.81	0.186	0.000179347	C_2
AGAP009544		nicotinamide mononucleotide adenylyltransferase [Source:VB Community Annotation]	2.8531e-08	1.78235	0.381	0.043	0.000374641	C_2
AGAP009231		Ninjurin	1.20553e-06	1.15184	0.714	0.173	0.0158299	C_2
AGAP006367		no poles/Zinc finger, RING-type	9.03629e-07	0.922752	0.857	0.255	0.0118655	C_2
AGAP000402		Nogo-B receptor precursor [Source:VB Community Annotation]	1.07648e-07	1.51535	0.619	0.121	0.00141352	C_2
AGAP011729		Nonspecific nucleoside hydrolase [Source:VB Community Annotation]	1.75762e-10	1.98872	0.667	0.104	2.30794e-06	C_2
AGAP006280		nuclear pore complex protein Nup210 [Source:VB Community Annotation]	9.41441e-07	1.51217	0.524	0.121	0.0123621	C_2
AGAP000480		nuclear pore complex protein Nup43 [Source:VB Community Annotation]	5.94786e-08	1.25432	0.619	0.121	0.000781014	C_2
AGAP010978		nuclear pore complex protein Nup62 [Source:VB Community Annotation]	3.80827e-09	1.74085	0.667	0.126	5.00064e-05	C_2
AGAP007376		nuclear transcription factor Y%2C alpha [Source:VB Community Annotation]	1.84833e-06	1.99539	0.333	0.048	0.0242704	C_2
AGAP010536		nucleolar complex protein 2 [Source:VB Community Annotation]	1.69535e-07	1.37618	0.81	0.234	0.00222617	C_2
AGAP004558		nucleoporin NDC1 [Source:VB Community Annotation]	1.52016e-11	2.34626	0.429	0.035	1.99612e-07	C_2
AGAP005174		nucleoporin SEH1 [Source:VB Community Annotation]	4.86591e-09	2.12499	0.429	0.052	6.38943e-05	C_2
AGAP006119		ODR-4 family	1.21466e-11	1.94938	0.619	0.082	1.59496e-07	C_2
AGAP011286		optic atrophy protein 1 [Source:VB Community Annotation]	3.28759e-08	1.45058	0.714	0.173	0.000431694	C_2
AGAP009949		oxidoreductase GLYR1 homolog [Source:VB Community Annotation]	2.74585e-08	1.55081	0.81	0.203	0.000360557	C_2
AGAP002883		Oxoglutarate/iron-dependent dioxygenase	2.36958e-06	0.612337	0.857	0.247	0.0311149	C_2
AGAP003613		palmitoyltransferase ZDHHC3 [Source:VB Community Annotation]	5.96289e-07	1.9336	0.524	0.117	0.00782987	C_2
AGAP010494		partitioning defective protein 6 [Source:VB Community Annotation]	1.18916e-07	1.24394	0.429	0.061	0.00156148	C_2
AGAP005936	Pym	Partner of Y14 and mago [Source:UniProtKB/Swiss-Prot%3BAcc:Q7Q6B5]	2.741e-08	1.76496	0.381	0.043	0.000359921	C_2
AGAP001878		peptide alpha-N-acetyltransferase [Source:VB Community Annotation]	1.12228e-06	1.81694	0.333	0.043	0.0147367	C_2
AGAP005410		peptide alpha-N-acetyltransferase [Source:VB Community Annotation]	2.83391e-07	1.27192	0.905	0.264	0.00372121	C_2
AGAP009310		peptide chain release factor subunit 3 [Source:VB Community Annotation]	2.27386e-06	1.04478	0.714	0.199	0.0298581	C_2
AGAP000757		peptide-O-fucosyltransferase [Source:VB Community Annotation]	7.01067e-09	1.52925	0.81	0.186	9.20571e-05	C_2
AGAP013475		Peptidyl-prolyl cis-trans isomerase NIMA-interacting 1 [Source:VB Community Annotation]	5.30525e-10	1.84006	0.619	0.095	6.96632e-06	C_2
AGAP004321		peptidyl-prolyl cis-trans isomerase NIMA-interacting 1 [Source:VB Community Annotation]	8.04944e-08	1.49576	0.667	0.143	0.00105697	C_2
AGAP013296		Peptidyl-prolyl cis-trans isomerase NIMA-interacting 4 [Source:VB Community Annotation]	1.5076e-06	0.703826	0.81	0.208	0.0197963	C_2
AGAP008136		peptidyl-prolyl cis-trans isomerase-like 4 [Source:VB Community Annotation]	3.31493e-07	1.34788	0.524	0.095	0.00435283	C_2
AGAP009810		peptidyl-prolyl isomerase E (cyclophilin E) [Source:VB Community Annotation]	1.55252e-06	1.28903	0.333	0.048	0.0203861	C_2
AGAP007392		peptidyl-prolyl isomerase H (cyclophilin H) [Source:VB Community Annotation]	1.79563e-06	1.43271	0.619	0.156	0.0235784	C_2
AGAP008425		peptidyl-tRNA hydrolase ICT1 [Source:VB Community Annotation]	8.61847e-07	0.974874	0.476	0.082	0.0113169	C_2
AGAP003883		peptidyl-tRNA hydrolase%2C PTH2 family [Source:VB Community Annotation]	1.01061e-06	1.40335	0.619	0.139	0.0132704	C_2
AGAP004768		periodic tryptophan protein 1 [Source:VB Community Annotation]	5.76813e-08	1.43901	0.667	0.143	0.000757414	C_2
AGAP010074		peroxin-13 [Source:VB Community Annotation]	3.04706e-06	1.27535	0.476	0.095	0.0400109	C_2
AGAP006651		peroxisomal 3%2C2-trans-enoyl-CoA isomerase [Source:VB Community Annotation]	1.17863e-08	0.886841	0.81	0.165	0.000154766	C_2
AGAP003517		phenylalanyl-tRNA synthetase beta chain [Source:VB Community Annotation]	2.01392e-07	1.07226	0.619	0.126	0.00264448	C_2
AGAP004340		Pheromone shutdown, TraB	2.96284e-08	1.68186	0.429	0.056	0.000389051	C_2
AGAP009839		Phosphatase 1 regulatory subunit 7 [Source:VB Community Annotation]	1.09365e-07	1.2894	0.714	0.16	0.00143608	C_2
AGAP008540		phosphatidylinositol glycan%2C class T [Source:VB Community Annotation]	2.04695e-08	1.55684	0.714	0.147	0.000268785	C_2
AGAP004271		phospholipase/carboxylesterase [Source:VB Community Annotation]	1.11696e-06	2.01443	0.381	0.061	0.0146669	C_2
AGAP011353		phosphomannomutase [Source:VB Community Annotation]	1.82862e-09	1.6226	0.619	0.1	2.40116e-05	C_2
AGAP009509	piwi	PIWI [Source:VB Community Annotation]	1.12799e-07	1.83458	0.429	0.065	0.00148116	C_2
AGAP005117		polyadenylate-binding protein 2 [Source:VB Community Annotation]	1.26104e-06	1.09572	0.905	0.268	0.0165587	C_2
AGAP010935		porphobilinogen synthase [Source:VB Community Annotation]	2.63336e-07	1.26289	0.762	0.19	0.00345787	C_2
AGAP005121		PRA1 family protein [Source:UniProtKB/TrEMBL%3BAcc:Q7Q9P5]	1.99133e-06	1.36277	0.762	0.221	0.0261481	C_2
AGAP011701		predicted G-protein coupled receptor GPCR [Source:VB Community Annotation]	6.18865e-07	1.08187	0.429	0.069	0.00812631	C_2
AGAP007217		pre-mRNA-processing factor 19 [Source:VB Community Annotation]	2.99854e-09	1.32216	0.762	0.156	3.93738e-05	C_2
AGAP008263		pre-mRNA-processing factor 40 [Source:VB Community Annotation]	9.76499e-11	1.48201	0.714	0.126	1.28224e-06	C_2
AGAP004225		pre-mRNA-splicing factor [Source:VB Community Annotation]	6.8104e-08	2.15818	0.381	0.048	0.000894273	C_2
AGAP000479		pre-rRNA-processing protein IPI3 [Source:VB Community Annotation]	9.54938e-12	1.67459	0.762	0.117	1.25393e-07	C_2
AGAP006616		Presequence protease%2C mitochondrial [Source:VB Community Annotation]	1.95724e-07	1.64404	0.619	0.139	0.00257005	C_2
AGAP005824		presqualene diphosphate phosphatase [Source:VB Community Annotation]	2.96874e-08	1.13445	0.905	0.234	0.000389825	C_2
AGAP010220		Proliferating cell nuclear antigen [Source:UniProtKB/TrEMBL%3BAcc:Q7Q0Q0]	4.06945e-12	2.21421	0.667	0.095	5.34359e-08	C_2
AGAP000809		Proteasome 26S non-ATPase subunit 10 [Source:VB Community Annotation]	2.4968e-07	1.46952	0.524	0.095	0.00327855	C_2
AGAP003826		proteasome assembly chaperone 2 [Source:VB Community Annotation]	1.48807e-08	1.43799	0.667	0.121	0.000195398	C_2
AGAP003593		Protein arginine methyltransferase RmtB [Source:VB Community Annotation]	7.67397e-07	1.57397	0.524	0.108	0.0100767	C_2
AGAP003476		protein BCP1 [Source:VB Community Annotation]	1.70017e-06	1.16945	0.762	0.208	0.0223249	C_2
AGAP011140		Protein canopy homolog 3 [Source:VB Community Annotation]	2.43554e-07	1.32575	0.905	0.281	0.00319811	C_2
AGAP011447		protein DEK [Source:VB Community Annotation]	1.77172e-06	1.12152	0.762	0.216	0.0232644	C_2
AGAP010217		protein disulfide-isomerase [Source:VB Community Annotation]	5.31416e-12	1.90046	0.714	0.108	6.97803e-08	C_2
AGAP000429		Protein FAN [Source:VB Community Annotation]	2.42408e-06	1.67504	0.286	0.035	0.0318306	C_2
AGAP004151		protein phosphatase 5 [Source:VB Community Annotation]	3.5129e-08	1.06177	0.905	0.225	0.000461279	C_2
AGAP008635		protein SDA1 [Source:VB Community Annotation]	4.43714e-07	1.26993	0.714	0.177	0.00582641	C_2
AGAP006346		protein spinster homolog 2 [Source:VB Community Annotation]	2.11691e-06	1.30247	0.667	0.182	0.0277972	C_2
AGAP001975		Protein SYS1 homolog [Source:VB Community Annotation]	3.27264e-10	1.47477	0.571	0.078	4.2973e-06	C_2
AGAP003183		protein transport protein SEC13 [Source:VB Community Annotation]	1.18428e-06	1.02542	1	0.281	0.0155508	C_2
AGAP011551		protein transport protein SEC31 [Source:VB Community Annotation]	1.49584e-07	1.20808	0.905	0.268	0.00196418	C_2
AGAP002901		Protein unc-50 homolog [Source:VB Community Annotation]	9.45164e-08	1.34176	0.714	0.16	0.0012411	C_2
AGAP000948		Protein YIPF [Source:UniProtKB/TrEMBL%3BAcc:A0NBS3]	1.90586e-06	1.07672	0.952	0.273	0.0250258	C_2
AGAP005673		Protein-lysine N-methyltransferase AgaP_AGAP005673 [Source:UniProtKB/TrEMBL%3BAcc:Q7Q6T8]	2.12642e-10	2.48216	0.381	0.03	2.7922e-06	C_2
AGAP006915		pyruvate dehydrogenase E2	3.38474e-08	1.29439	0.952	0.255	0.00044445	C_2
AGAP007975		pyruvate dehydrogenase E2 component (dihydrolipoamide acetyltransferase) [Source:VB Community Annotation]	8.70853e-07	1.00567	0.905	0.307	0.0114352	C_2
AGAP003622		Queuine tRNA-ribosyltransferase catalytic subunit 1 [Source:UniProtKB/TrEMBL%3BAcc:Q7QAM7]	6.07139e-08	1.87171	0.476	0.074	0.000797234	C_2
AGAP007332		Rab GTPase-activating protein 1 isoform a [Source:VB Community Annotation]	2.54792e-06	1.05016	0.571	0.13	0.0334567	C_2
AGAP002729		Ras GTPase-activating protein 1 [Source:VB Community Annotation]	2.87113e-06	1.01795	0.762	0.208	0.0377008	C_2
AGAP002991		Ras-related GTP-binding protein A/B [Source:VB Community Annotation]	8.4269e-07	1.34621	0.619	0.143	0.0110654	C_2
AGAP000433		Ras-related protein Rab-39B [Source:VB Community Annotation]	1.25707e-06	1.45574	0.619	0.152	0.0165066	C_2
AGAP001421		replication factor A1 [Source:VB Community Annotation]	2.26564e-11	1.99293	0.762	0.139	2.97502e-07	C_2
AGAP008332		replication factor A2 [Source:VB Community Annotation]	2.46725e-10	1.74088	0.81	0.156	3.23975e-06	C_2
AGAP010177		replication factor A3 [Source:VB Community Annotation]	4.56203e-13	1.81144	0.905	0.152	5.9904e-09	C_2
AGAP009178		Reticulon 4 interacting protein 1 [Source:VB Community Annotation]	7.12383e-07	1.66217	0.381	0.056	0.00935431	C_2
AGAP011243		ribonuclease H2 subunit C [Source:VB Community Annotation]	2.88808e-11	2.11756	0.381	0.026	3.79234e-07	C_2
AGAP002362		ribonuclease P protein subunit p20 [Source:VB Community Annotation]	1.40449e-07	1.24762	0.619	0.121	0.00184424	C_2
AGAP011457		ribose 5-phosphate isomerase A [Source:VB Community Annotation]	2.22958e-08	1.35851	0.81	0.177	0.000292766	C_2
AGAP005221		ribosomal RNA methyltransferase Nop2 [Source:VB Community Annotation]	2.73212e-06	0.997129	0.571	0.134	0.0358755	C_2
AGAP002831		ribosomal RNA small subunit methyltransferase H [Source:VB Community Annotation]	3.73788e-11	1.76365	0.619	0.087	4.90821e-07	C_2
AGAP005365		ribosome biogenesis protein BRX1 [Source:VB Community Annotation]	1.18915e-06	1.17062	0.81	0.221	0.0156147	C_2
AGAP007244		Ribosome biogenesis protein WDR12 homolog [Source:UniProtKB/Swiss-Prot%3BAcc:Q7QJ33]	2.10527e-08	1.47666	0.857	0.203	0.000276443	C_2
AGAP007882		ribosome maturation protein SBDS [Source:VB Community Annotation]	1.71687e-06	1.17959	0.524	0.108	0.0225442	C_2
AGAP003048		ribosome production factor 2 [Source:VB Community Annotation]	8.13135e-07	0.95485	0.857	0.234	0.0106773	C_2
AGAP005080		Ribulose-phosphate 3-epimerase [Source:UniProtKB/TrEMBL%3BAcc:Q7Q9R5]	1.36709e-09	1.66631	0.762	0.152	1.79512e-05	C_2
AGAP008148		RING finger and SPRY domain-containing protein 1 [Source:VB Community Annotation]	1.49807e-07	1.18241	0.714	0.173	0.00196712	C_2
AGAP012121		RIO kinase 1 [Source:VB Community Annotation]	4.38252e-07	1.44883	0.429	0.069	0.00575469	C_2
AGAP001302		RNA polymerase II-associated factor 1 [Source:VB Community Annotation]	1.7031e-07	1.45079	0.619	0.13	0.00223634	C_2
AGAP003242		RNA polymerase-associated protein LEO1 [Source:VB Community Annotation]	4.02998e-07	1.30041	0.476	0.082	0.00529176	C_2
AGAP004145		RNA-binding protein PNO1 [Source:VB Community Annotation]	3.92173e-09	1.62069	0.762	0.156	5.14962e-05	C_2
AGAP001460		rumpelstiltskin, hnRNP M homolog	1.98459e-06	1.30641	0.667	0.186	0.0260596	C_2
AGAP009746		RuvB-like protein 2 [Source:VB Community Annotation]	4.94296e-08	1.38954	0.667	0.156	0.00064906	C_2
AGAP010499	AD20590	S-(hydroxymethyl)glutathione dehydrogenase [Source:UniProtKB/TrEMBL%3BAcc:A0A1S4H465]	3.57474e-06	1.11897	0.952	0.294	0.0469399	C_2
AGAP011375		Selenophosphate synthetase 2 [Source:VB Community Annotation]	4.18236e-07	1.64916	0.524	0.1	0.00549185	C_2
AGAP011532		septin [Source:VB Community Annotation]	2.45493e-06	1.15004	0.905	0.294	0.0322357	C_2
AGAP003017		serine/threonine-protein phosphatase 6 catalytic subunit [Source:VB Community Annotation]	1.07601e-07	1.31676	0.81	0.216	0.00141291	C_2
AGAP002535		serine/threonine-protein phosphatase PGAM5 [Source:VB Community Annotation]	5.47263e-07	2.22944	0.286	0.03	0.00718611	C_2
AGAP008265		seryl-tRNA synthetase [Source:VB Community Annotation]	2.15919e-06	1.00292	1	0.307	0.0283523	C_2
AGAP002627		S-formylglutathione hydrolase [Source:UniProtKB/TrEMBL%3BAcc:Q7QCH6]	1.35871e-11	1.81837	0.81	0.143	1.78412e-07	C_2
AGAP004519		sideroflexin 1%2C2%2C3 [Source:VB Community Annotation]	3.51179e-06	1.07572	0.952	0.294	0.0461133	C_2
AGAP006688		signal recognition particle receptor subunit beta [Source:VB Community Annotation]	6.18155e-09	1.47332	0.905	0.216	8.11699e-05	C_2
AGAP006895		signal recognition particle subunit SRP19 [Source:VB Community Annotation]	4.96493e-07	1.15491	0.952	0.268	0.00651945	C_2
AGAP002183		Signal recognition particle subunit SRP68 [Source:UniProtKB/TrEMBL%3BAcc:Q7QK73]	7.33034e-07	1.70865	0.524	0.113	0.00962547	C_2
AGAP008494		signal transducing adaptor molecule [Source:VB Community Annotation]	3.80452e-08	1.2962	0.81	0.212	0.000499571	C_2
AGAP002477		single-stranded DNA-binding protein%2C mitochondrial [Source:VB Community Annotation]	6.45843e-07	0.753475	0.619	0.134	0.00848057	C_2
AGAP012380		small nuclear ribonucleoprotein D3 [Source:VB Community Annotation]	3.32271e-09	1.40852	0.81	0.165	4.36305e-05	C_2
AGAP010440		small nuclear ribonucleoprotein E [Source:VB Community Annotation]	2.27264e-12	2.00497	0.762	0.113	2.9842e-08	C_2
AGAP002658		small nuclear ribonucleoprotein polypeptide F [Source:VB Community Annotation]	2.18133e-07	1.18436	0.81	0.195	0.00286431	C_2
AGAP009498		solute carrier family 17 (anion/sugar transporter)%2C member 5 [Source:VB Community Annotation]	2.74216e-06	1.09229	0.476	0.095	0.0360073	C_2
AGAP001447		solute carrier family 35 (UDP-galactose transporter)%2C member B1 [Source:VB Community Annotation]	3.09183e-07	1.13303	1	0.342	0.00405988	C_2
AGAP000544		solute carrier family 35%2C member E1 [Source:VB Community Annotation]	3.14788e-06	1.27663	0.524	0.117	0.0413349	C_2
AGAP009188		solute carrier family 39 (zinc transporter)%2C member 9 [Source:VB Community Annotation]	2.65631e-08	1.84024	0.571	0.104	0.000348799	C_2
AGAP001724	Sply	sphingosine-1-phosphate lyase [Source:VB Community Annotation]	1.05635e-06	1.58308	0.571	0.134	0.013871	C_2
AGAP002956		splicing factor U2AF 35 kDa subunit [Source:VB Community Annotation]	4.65818e-07	1.03872	0.857	0.212	0.00611666	C_2
AGAP008303		splicing factor%2C arginine/serine-rich 7 [Source:VB Community Annotation]	8.43776e-07	1.09074	0.905	0.255	0.0110796	C_2
AGAP013440		SRA stem-loop-interacting RNA-binding protein%2C mitochondrial [Source:VB Community Annotation]	1.5734e-08	1.12838	0.905	0.203	0.000206603	C_2
AGAP011463		src homology 2 domain-containing transforming protein C [Source:VB Community Annotation]	2.29693e-06	1.31703	0.619	0.156	0.030161	C_2
AGAP007879		Steroid dehydrogenase [Source:VB Community Annotation]	2.14798e-07	1.41779	0.571	0.108	0.00282051	C_2
AGAP001749		Stromal cell-derived factor 2 [Source:VB Community Annotation]	1.83252e-06	1.18974	0.952	0.32	0.0240628	C_2
AGAP012335		structure-specific recognition protein 1 [Source:VB Community Annotation]	1.30834e-07	1.26248	0.667	0.147	0.00171799	C_2
AGAP006161		suppressor of G2 allele of SKP1 [Source:VB Community Annotation]	1.18839e-08	1.29642	0.762	0.16	0.000156047	C_2
AGAP005413		survival of motor neuron protein-interacting protein 1 [Source:VB Community Annotation]	3.34476e-06	1.14381	0.619	0.156	0.04392	C_2
AGAP008756		syntaxin 5 [Source:VB Community Annotation]	1.47156e-06	1.28491	0.571	0.13	0.0193231	C_2
AGAP003023		syntaxin-binding protein 1 [Source:VB Community Annotation]	2.21259e-06	1.25547	0.762	0.212	0.0290535	C_2
AGAP006097		target of Myb-like protein 2 [Source:VB Community Annotation]	1.49192e-07	1.4551	0.81	0.221	0.00195904	C_2
AGAP005738		TBC1 domain family member 13 [Source:VB Community Annotation]	2.12607e-06	1.74884	0.429	0.078	0.0279174	C_2
AGAP002257		tetraspanin 14 [Source:VB Community Annotation]	1.09001e-09	2.07419	0.619	0.117	1.43129e-05	C_2
AGAP002363		Thioredoxin domain	1.66789e-06	1.32527	0.762	0.216	0.0219011	C_2
AGAP000396	TPX1	thioredoxin peroxidase 1 [Source:VB Community Annotation]	3.21054e-07	0.948082	0.905	0.229	0.00421576	C_2
AGAP005462		Thioredoxin-like	8.21091e-08	1.08659	1	0.26	0.00107817	C_2
AGAP002821		TM2 domain	1.14908e-06	1.2697	0.571	0.121	0.0150885	C_2
AGAP010691		TNF receptor-associated protein 1 [Source:VB Community Annotation]	3.42389e-08	1.49619	0.714	0.16	0.000449591	C_2
AGAP009547		torsin A [Source:VB Community Annotation]	1.60664e-09	1.64626	0.857	0.199	2.10968e-05	C_2
AGAP002528		trafficking protein particle complex subunit 2 [Source:VB Community Annotation]	1.92119e-07	1.62819	0.476	0.078	0.00252271	C_2
AGAP003154		Transcription elongation factor B polypeptide 2 [Source:VB Community Annotation]	1.93893e-09	1.49254	0.905	0.216	2.546e-05	C_2
AGAP005428		transcription elongation factor SPT4 1 [Source:VB Community Annotation]	1.05953e-07	0.857115	0.524	0.087	0.00139127	C_2
AGAP005522		transcription initiation factor TFIID subunit 11 [Source:VB Community Annotation]	2.99669e-07	1.61623	0.524	0.1	0.00393496	C_2
AGAP007002		transcription initiation factor TFIIF subunit beta [Source:VB Community Annotation]	6.87781e-13	2.42433	0.571	0.061	9.03125e-09	C_2
AGAP006798		transformer-2 protein [Source:VB Community Annotation]	2.58973e-10	2.36413	0.333	0.022	3.40058e-06	C_2
AGAP005937		translation initiation factor eIF-2B subunit delta [Source:VB Community Annotation]	1.80603e-07	1.21762	0.476	0.078	0.0023715	C_2
AGAP001700		translational activator GCN1 [Source:VB Community Annotation]	1.1385e-06	1.36505	0.524	0.113	0.0149496	C_2
AGAP010210		Translocase of inner mitochondrial membrane 23 homolog [Source:VB Community Annotation]	2.37656e-09	1.38758	0.762	0.147	3.12066e-05	C_2
AGAP000291		Translocase of inner mitochondrial membrane 44 homolog (yeast) [Source:VB Community Annotation]	8.60148e-07	1.26722	0.714	0.19	0.0112946	C_2
AGAP010029		transmembrane 9 superfamily member 2/4 [Source:VB Community Annotation]	9.74981e-07	1.51311	0.619	0.152	0.0128025	C_2
AGAP007934		Transmembrane receptor	5.71066e-07	1.31227	0.714	0.208	0.00749866	C_2
AGAP009904		tRNA (adenine-N(1)-)-methyltransferase non-catalytic subunit [Source:VB Community Annotation]	1.06931e-06	1.84772	0.476	0.095	0.0140411	C_2
AGAP002504		tRNA (cytosine34-C5)-methyltransferase [Source:VB Community Annotation]	1.20148e-10	1.57129	0.857	0.173	1.57767e-06	C_2
AGAP007705		tRNA acetyltransferase TAN1 [Source:VB Community Annotation]	9.42346e-09	1.96479	0.429	0.052	0.000123739	C_2
AGAP007066		tRNA-specific adenosine deaminase 3 [Source:VB Community Annotation]	9.5874e-07	1.6114	0.571	0.134	0.0125892	C_2
AGAP008147		tRNA-splicing ligase RtcB homolog [Source:UniProtKB/Swiss-Prot%3BAcc:Q7Q412]	3.63161e-07	0.838486	0.571	0.117	0.00476867	C_2
AGAP010682		Troponin C-akin-1	8.235e-07	1.32023	0.619	0.134	0.0108134	C_2
AGAP007834		Tubulin gamma chain [Source:UniProtKB/TrEMBL%3BAcc:Q7Q3E4]	3.05043e-06	1.29682	0.571	0.139	0.0400552	C_2
AGAP002130		tubulin-specific chaperone A [Source:VB Community Annotation]	3.57543e-09	1.47651	0.81	0.177	4.6949e-05	C_2
AGAP010770		Tubulin-specific chaperone E	8.56108e-09	1.79126	0.714	0.16	0.000112416	C_2
AGAP004284		tubulin--tyrosine ligase-like protein 12 [Source:VB Community Annotation]	1.23834e-10	1.5992	0.476	0.052	1.62606e-06	C_2
AGAP005934		Tumor susceptibility 101 protein [Source:VB Community Annotation]	2.93393e-09	1.84019	0.667	0.126	3.85254e-05	C_2
AGAP001584	snRNP-U1-C	U1 small nuclear ribonucleoprotein C [Source:UniProtKB/Swiss-Prot%3BAcc:Q7PXU6]	3.44974e-06	1.03356	0.619	0.143	0.0452986	C_2
AGAP006372		U3 small nucleolar ribonucleoprotein protein IMP3 [Source:VB Community Annotation]	1.96461e-09	1.77064	0.571	0.091	2.57972e-05	C_2
AGAP001146		U3 small nucleolar RNA-associated protein 12 [Source:VB Community Annotation]	1.95831e-06	1.82817	0.476	0.104	0.0257146	C_2
AGAP002088		U3 small nucleolar RNA-associated protein 15 [Source:VB Community Annotation]	4.81159e-07	1.34112	0.476	0.082	0.0063181	C_2
AGAP010698		U3 small nucleolar RNA-associated protein 5 [Source:VB Community Annotation]	6.67899e-09	1.93185	0.524	0.082	8.77018e-05	C_2
AGAP008427	UTP6	U3 small nucleolar RNA-associated protein 6 homolog [Source:VB Community Annotation]	8.54998e-08	2.06503	0.381	0.048	0.0011227	C_2
AGAP008882		U3 small nucleolar RNA-associated protein MPP10 [Source:VB Community Annotation]	8.98541e-07	1.35843	0.524	0.108	0.0117987	C_2
AGAP001686		U6 snRNA-associated Sm-like protein LSm1 [Source:VB Community Annotation]	1.06805e-06	1.48731	0.476	0.087	0.0140246	C_2
AGAP005136		U6 snRNA-associated Sm-like protein LSm2 [Source:VB Community Annotation]	6.29388e-08	1.28611	0.619	0.113	0.00082645	C_2
AGAP013519		U6 snRNA-associated Sm-like protein LSm3 [Source:VB Community Annotation]	2.60364e-07	1.07299	0.81	0.195	0.00341884	C_2
AGAP009687		U6 snRNA-associated Sm-like protein LSm4 [Source:VB Community Annotation]	2.02374e-08	1.50712	0.762	0.173	0.000265737	C_2
AGAP011837		U6 snRNA-associated Sm-like protein LSm8 [Source:VB Community Annotation]	7.93581e-11	1.76941	0.81	0.143	1.04205e-06	C_2
AGAP012113		ubiquitin carboxyl-terminal hydrolase L3 [Source:VB Community Annotation]	3.57703e-06	1.02463	0.857	0.251	0.04697	C_2
AGAP005540		ubiquitin carboxyl-terminal hydrolase L5 [Source:VB Community Annotation]	1.0641e-07	1.12073	0.762	0.182	0.00139728	C_2
AGAP007001		ubiquitin thioesterase OTU1 [Source:VB Community Annotation]	1.17969e-06	1.02712	0.81	0.208	0.0154905	C_2
AGAP009507		ubiquitin thioesterase protein OTUB1 [Source:VB Community Annotation]	9.12694e-10	1.45437	0.762	0.143	1.19846e-05	C_2
AGAP007952		ubiquitin-conjugating enzyme E2 D/E [Source:VB Community Annotation]	3.52811e-06	0.916953	0.619	0.143	0.0463276	C_2
AGAP005954		ubiquitin-conjugating enzyme E2 J2 [Source:VB Community Annotation]	3.48495e-07	1.33086	0.667	0.147	0.00457609	C_2
AGAP011251		ubiquitin-like protein 5 [Source:VB Community Annotation]	8.14118e-08	1.24987	0.952	0.247	0.00106902	C_2
AGAP006391		UBX domain protein 6 [Source:VB Community Annotation]	2.74216e-06	1.30374	0.476	0.095	0.0360073	C_2
AGAP005122		UBX domain-containing protein 1 [Source:VB Community Annotation]	8.74597e-08	1.36785	0.81	0.208	0.00114843	C_2
AGAP003560		UDP-glucose:glycoprotein glucosyltransferase [Source:VB Community Annotation]	1.28676e-10	1.52048	0.952	0.238	1.68965e-06	C_2
AGAP000387		UDP-N-acetylglucosamine transporter [Source:VB Community Annotation]	1.64153e-06	1.83937	0.381	0.061	0.0215549	C_2
AGAP011975		Ufm1-specific protease 2 [Source:VB Community Annotation]	4.54311e-07	0.873951	0.524	0.1	0.00596556	C_2
AGAP009823		Uncharacterized conserved protein (DUF2359)	3.2272e-07	1.24974	0.952	0.32	0.00423763	C_2
AGAP005893		unconventional SNARE in the endoplasmic reticulum protein 1 [Source:VB Community Annotation]	2.38157e-07	1.7736	0.381	0.052	0.00312725	C_2
AGAP011588		Unknown	5.82312e-11	2.56559	0.429	0.039	7.64634e-07	C_2
AGAP000454		Unknown	2.3398e-12	2.45186	0.571	0.065	3.07239e-08	C_2
AGAP013524		Unknown	6.36233e-10	2.26259	0.381	0.035	8.35438e-06	C_2
AGAP006659		Unknown	1.58928e-11	2.15512	0.333	0.017	2.08689e-07	C_2
AGAP001277		Unknown	6.91809e-10	2.1379	0.429	0.043	9.08414e-06	C_2
AGAP001787		Unknown	2.37231e-08	2.12525	0.286	0.022	0.000311508	C_2
AGAP003732		Unknown	1.20461e-12	2.09554	0.571	0.061	1.58177e-08	C_2
AGAP028740		Unknown	4.02952e-12	1.93271	0.714	0.1	5.29116e-08	C_2
AGAP009545		Unknown	1.42638e-07	1.91729	0.429	0.065	0.00187298	C_2
AGAP011364		Unknown	4.9652e-10	1.88589	0.619	0.095	6.51981e-06	C_2
AGAP028741		Unknown	2.50347e-07	1.87597	0.429	0.065	0.00328731	C_2
AGAP012933		Unknown	3.15551e-10	1.86032	0.714	0.126	4.1435e-06	C_2
AGAP005801		Unknown	3.32385e-07	1.85925	0.571	0.126	0.00436455	C_2
AGAP028194		Unknown	9.60015e-09	1.85402	0.524	0.082	0.00012606	C_2
AGAP006940		Unknown	3.16812e-09	1.84859	0.333	0.026	4.16006e-05	C_2
AGAP001719		Unknown	1.43982e-08	1.84811	0.619	0.113	0.000189063	C_2
AGAP008774		Unknown	1.17591e-09	1.84639	0.571	0.082	1.54409e-05	C_2
AGAP009177		Unknown	2.23403e-07	1.79789	0.333	0.039	0.00293351	C_2
AGAP011358		Unknown	1.52481e-07	1.79342	0.429	0.065	0.00200223	C_2
AGAP000438		Unknown	2.4402e-06	1.77209	0.381	0.065	0.0320423	C_2
AGAP006814		Unknown	9.42346e-09	1.75251	0.429	0.052	0.000123739	C_2
AGAP013515		Unknown	7.58138e-07	1.74744	0.429	0.074	0.00995511	C_2
AGAP007610		Unknown	5.71966e-11	1.73872	0.762	0.139	7.51048e-07	C_2
AGAP007381		Unknown	1.36714e-09	1.73427	0.667	0.126	1.79519e-05	C_2
AGAP002405		Unknown	1.07578e-10	1.73003	0.667	0.1	1.41261e-06	C_2
AGAP003960		Unknown	3.91062e-07	1.72792	0.476	0.087	0.00513504	C_2
AGAP007603		Unknown	3.86718e-07	1.72478	0.381	0.056	0.00507799	C_2
AGAP028076		Unknown	1.0921e-08	1.72089	0.667	0.147	0.000143403	C_2
AGAP011818		Unknown	1.64162e-09	1.70431	0.571	0.087	2.15562e-05	C_2
AGAP008852		Unknown	1.37854e-09	1.67771	0.667	0.121	1.81015e-05	C_2
AGAP009445		Unknown	1.71246e-10	1.64807	0.762	0.13	2.24863e-06	C_2
AGAP004174		Unknown	1.46941e-10	1.61434	0.619	0.091	1.92948e-06	C_2
AGAP028724		Unknown	4.10815e-08	1.58469	0.429	0.056	0.000539441	C_2
AGAP003041		Unknown	9.85797e-08	1.52665	0.619	0.13	0.00129445	C_2
AGAP029057		Unknown	9.02304e-08	1.52443	0.333	0.035	0.00118481	C_2
AGAP001796		Unknown	1.8094e-06	1.523	0.476	0.091	0.0237592	C_2
AGAP012364		Unknown	6.86203e-10	1.51598	0.762	0.143	9.01054e-06	C_2
AGAP005240		Unknown	2.09386e-07	1.51304	0.571	0.113	0.00274944	C_2
AGAP010752		Unknown	4.48978e-07	1.50492	0.429	0.065	0.00589553	C_2
AGAP008864		Unknown	2.89367e-06	1.44139	0.381	0.061	0.0379968	C_2
AGAP007624		Unknown	2.10787e-06	1.43371	0.571	0.13	0.0276785	C_2
AGAP011345		Unknown	2.90533e-08	1.40886	0.476	0.069	0.000381499	C_2
AGAP011522		Unknown	4.49917e-08	1.39161	0.476	0.069	0.000590786	C_2
AGAP004138		Unknown	1.0435e-07	1.37814	0.524	0.091	0.00137022	C_2
AGAP012330		Unknown	1.75443e-06	1.37812	0.429	0.082	0.0230374	C_2
AGAP000343		Unknown	1.89357e-06	1.37329	0.524	0.113	0.0248644	C_2
AGAP010756		Unknown	1.17697e-09	1.36813	0.667	0.113	1.54548e-05	C_2
AGAP013252		Unknown	1.00508e-06	1.3528	0.81	0.255	0.0131977	C_2
AGAP002668		Unknown	6.45425e-08	1.34276	0.762	0.186	0.000847507	C_2
AGAP011996		Unknown	1.48085e-08	1.33906	0.905	0.221	0.00019445	C_2
AGAP011336		Unknown	6.45105e-07	1.3358	0.524	0.104	0.00847087	C_2
AGAP004778		Unknown	7.65878e-08	1.32725	0.81	0.199	0.00100567	C_2
AGAP001428		Unknown	3.95123e-08	1.31838	0.524	0.082	0.000518836	C_2
AGAP002131		Unknown	1.82786e-07	1.30598	0.857	0.251	0.00240017	C_2
AGAP005683		Unknown	8.4049e-07	1.30391	0.714	0.182	0.0110365	C_2
AGAP012729		Unknown	3.48482e-07	1.29184	0.619	0.134	0.00457592	C_2
AGAP002215		Unknown	2.25595e-06	1.27441	0.714	0.234	0.0296229	C_2
AGAP012587		Unknown	7.8383e-08	1.26818	0.952	0.26	0.00102925	C_2
AGAP003243		Unknown	8.78848e-07	1.23846	0.762	0.208	0.0115402	C_2
AGAP011517		Unknown	7.47408e-07	1.21152	0.714	0.186	0.00981422	C_2
AGAP012420		Unknown	4.25169e-07	1.15147	0.619	0.134	0.0055829	C_2
AGAP010754		Unknown	1.98301e-07	1.14401	0.333	0.039	0.00260389	C_2
AGAP005376		Unknown	8.89292e-07	1.08525	0.81	0.234	0.0116773	C_2
AGAP008524		Unknown	2.48082e-06	1.06723	0.952	0.277	0.0325756	C_2
AGAP003486		Unknown	1.50772e-06	1.01723	0.762	0.216	0.0197979	C_2
AGAP000274		Unknown	1.06505e-07	1.01279	0.714	0.156	0.00139852	C_2
AGAP000400		Unknown	9.85812e-08	0.998559	0.476	0.074	0.00129447	C_2
AGAP000126		Unknown	3.21555e-06	0.966186	0.476	0.1	0.0422233	C_2
AGAP000323		Unknown	6.16487e-08	0.944521	0.857	0.212	0.00080951	C_2
AGAP013336		Unknown	3.48846e-06	0.874004	0.714	0.182	0.045807	C_2
AGAP001629		Unknown	9.83166e-08	0.827164	0.667	0.134	0.001291	C_2
AGAP003155		UPF0483 protein AGAP003155 [Source:VB Community Annotation]	8.57883e-08	1.10693	0.857	0.199	0.00112649	C_2
AGAP002541		UPF0528 family	7.49792e-11	2.09595	0.524	0.061	9.84551e-07	C_2
AGAP007111		uracil phosphoribosyltransferase [Source:VB Community Annotation]	8.82285e-07	1.59334	0.571	0.13	0.0115853	C_2
AGAP011895		uroporphyrinogen decarboxylase [Source:VB Community Annotation]	1.48715e-07	1.134	0.952	0.255	0.00195277	C_2
AGAP000733		UV excision repair protein RAD23 [Source:VB Community Annotation]	2.65529e-06	0.733928	0.857	0.242	0.0348665	C_2
AGAP003731		vacuolar protein sorting-associated protein 37B [Source:VB Community Annotation]	6.86082e-07	1.31229	0.667	0.152	0.00900894	C_2
AGAP008769		very long chain acyl-CoA dehydrogenase [Source:VB Community Annotation]	2.15943e-06	1.30271	0.667	0.177	0.0283555	C_2
AGAP003815		very-long-chain (3R)-3-hydroxyacyl-(acyl-carrier protein) dehydratase [Source:VB Community Annotation]	9.41616e-08	1.21144	0.619	0.121	0.00123644	C_2
AGAP008803		Vesicle coat complex COPII	2.12123e-09	1.53539	0.714	0.134	2.78539e-05	C_2
AGAP002357		vesicle transport protein GOT1B [Source:VB Community Annotation]	1.02626e-07	1.13153	0.905	0.255	0.00134759	C_2
AGAP010305		WD repeat and SOF domain-containing protein 1 [Source:VB Community Annotation]	5.3839e-07	1.31391	0.476	0.087	0.0070696	C_2
AGAP007626		WD repeat-containing protein 61 [Source:VB Community Annotation]	2.10266e-06	1.23741	0.476	0.095	0.02761	C_2
AGAP004418		WD40/YVTN repeat-like-containing domain	4.32072e-10	1.43477	0.762	0.152	5.67354e-06	C_2
AGAP006951		YIP1 family member 1 [Source:VB Community Annotation]	3.38664e-06	1.50623	0.524	0.117	0.0444699	C_2
AGAP002175		Yip1 interacting factor homolog B [Source:VB Community Annotation]	2.6368e-07	1.32072	0.81	0.208	0.00346238	C_2
AGAP008634		zinc finger CCCH domain-containing protein 15 [Source:VB Community Annotation]	4.78091e-08	1.25472	0.762	0.177	0.000627782	C_2
AGAP003701		zinc finger protein 593 homolog [Source:VB Community Annotation]	2.12324e-06	0.644425	0.571	0.121	0.0278802	C_2
AGAP002118		zinc finger protein 622 [Source:VB Community Annotation]	2.44534e-07	1.49126	0.571	0.117	0.00321098	C_2
AGAP004516		Zinc finger, C2H2, APLF-like	2.467e-07	2.18648	0.381	0.056	0.00323942	C_2
AGAP006373		Zinc finger, C2H2-like	1.0641e-07	1.13474	0.762	0.182	0.00139728	C_2
AGAP004640		Zinc finger, RING-type	2.4032e-06	1.44666	0.524	0.117	0.0315564	C_2
AGAP003590			1.08651e-09	2.92975	0.238	0.009	1.4267e-05	C_2
AGAP010685			2.28561e-11	2.82903	0.333	0.017	3.00124e-07	C_2
AGAP012922			2.28561e-11	2.76562	0.333	0.017	3.00124e-07	C_2
AGAP009048			1.83119e-07	2.61891	0.19	0.009	0.00240453	C_2
AGAP002392			1.21094e-06	2.61034	0.238	0.022	0.0159009	C_2
AGAP009406			4.88699e-09	2.2425	0.19	0.004	6.4171e-05	C_2
AGAP005474			2.06199e-07	2.1473	0.238	0.017	0.0027076	C_2
AGAP005957			2.10686e-06	1.91508	0.238	0.022	0.0276652	C_2
AGAP028430			3.12327e-07	1.87912	0.238	0.017	0.00410116	C_2
AGAP011494			2.26646e-08	1.8682	0.238	0.013	0.000297609	C_2
AGAP011042			4.66779e-07	1.64458	0.429	0.069	0.00612927	C_2
AGAP004330			2.87983e-06	1.56133	0.19	0.013	0.0378151	C_2
AGAP011536			1.33439e-09	1.49941	0.238	0.009	1.75218e-05	C_2
AGAP002530			1.75404e-06	1.32801	0.238	0.022	0.0230322	C_2
AGAP028101			2.10686e-06	1.26066	0.238	0.022	0.0276652	C_2
AGAP005618		1%2C2-dihydroxy-3-keto-5-methylthiopentene dioxygenase [Source:UniProtKB/TrEMBL%3BAcc:Q7Q6X6]	6.44982e-08	1.11821	0.821	0.424	0.000846926	C_3
AGAP002061		26S proteasome regulatory subunit N7 [Source:VB Community Annotation]	1.07801e-09	1.79597	0.75	0.295	1.41553e-05	C_3
AGAP001942		2-keto-4-pentenoate hydratase/2-oxohepta-3-ene-1	1.40516e-06	1.71489	0.607	0.237	0.0184511	C_3
AGAP001256		3'-phosphoadenosine 5'-phosphosulfate synthase [Source:VB Community Annotation]	2.75639e-10	1.29507	0.964	0.464	3.61941e-06	C_3
AGAP000964		3TM protein	1.05868e-08	0.984611	1	0.527	0.000139015	C_3
AGAP012396		4.3 kDa secreted salivary peptide [Source:VB Community Annotation]	8.42131e-07	1.0148	0.786	0.375	0.011058	C_3
AGAP009572	RpS15a-2	40S ribosomal protein S15a [Source:VB Community Annotation]	1.5475e-06	0.629543	1	0.558	0.0203203	C_3
AGAP000415		5-hydroxyisourate hydrolase [Source:VB Community Annotation]	1.416e-06	0.84797	0.893	0.513	0.0185935	C_3
AGAP004210		7TM GPCR, serpentine receptor class h (Srh)	6.36348e-08	1.54993	0.75	0.29	0.000835588	C_3
AGAP004396		acetyl-CoA hydrolase/transferase (Precursor) [Source:VB Community Annotation]	9.47018e-08	1.34133	0.75	0.312	0.00124353	C_3
AGAP005662		acyl-CoA dehydrogenase [Source:VB Community Annotation]	1.65425e-06	1.48625	0.679	0.326	0.0217219	C_3
AGAP001662		ADAM-TS Spacer 1	3.67604e-08	0.643552	1	0.746	0.0004827	C_3
AGAP003652		aldehyde dehydrogenase (NAD+) [Source:VB Community Annotation]	1.67038e-06	1.45476	0.714	0.353	0.0219338	C_3
AGAP003578		aldehyde dehydrogenase (NAD+) [Source:VB Community Annotation]	2.33359e-09	1.40968	0.893	0.415	3.06424e-05	C_3
AGAP011050		aldehyde reductase [Source:VB Community Annotation]	6.07345e-09	1.33562	0.821	0.388	7.97505e-05	C_3
AGAP012641		aldose reductase [Source:VB Community Annotation]	2.82469e-06	1.88417	0.5	0.156	0.037091	C_3
AGAP003408		aldose reductase [Source:VB Community Annotation]	8.51328e-12	1.53159	0.929	0.424	1.11788e-07	C_3
AGAP012053		alpha%2Calpha-trehalase [Source:VB Community Annotation]	4.61509e-11	1.22545	0.964	0.531	6.06008e-07	C_3
AGAP003521		alpha-2-macroglobulin receptor-associated protein [Source:VB Community Annotation]	2.52185e-08	1.98088	0.643	0.237	0.000331144	C_3
AGAP008632		alpha-aminoadipic semialdehyde synthase [Source:VB Community Annotation]	9.97527e-09	1.36814	0.893	0.46	0.000130985	C_3
AGAP009621		alpha-N-acetylgalactosaminidase [Source:VB Community Annotation]	6.28347e-16	1.92983	0.964	0.344	8.25083e-12	C_3
AGAP000806		Angiopoietin-like 1 [Source:VB Community Annotation]	1.0301e-07	1.39079	0.786	0.362	0.00135262	C_3
AGAP000975		Angiotensin II, type I receptor-associated	6.5721e-10	1.70775	0.75	0.281	8.62982e-06	C_3
AGAP003720		annexin A4 [Source:VB Community Annotation]	1.80678e-08	1.61551	0.75	0.29	0.000237249	C_3
AGAP003721	ANXB10B	annexin B10B [Source:VB Community Annotation]	5.60108e-11	1.47973	0.893	0.406	7.35478e-07	C_3
AGAP003722	ANXB10C	annexin B10C [Source:VB Community Annotation]	2.77044e-07	1.58377	0.714	0.277	0.00363786	C_3
AGAP001703		AP-2 complex subunit sigma [Source:VB Community Annotation]	8.81155e-07	0.855404	0.786	0.46	0.0115705	C_3
AGAP002594		apolipoprotein D [Source:VB Community Annotation]	3.72933e-11	0.802491	1	0.643	4.89698e-07	C_3
AGAP002182	ABCE1	ATP-binding cassette transporter (ABC transporter) family E member 1 [Source:VB Community Annotation]	3.16222e-09	1.36853	0.857	0.393	4.15231e-05	C_3
AGAP009850		ATP-binding cassette transporter (ABC transporter) family G member 7 [Source:VB Community Annotation]	1.57007e-06	1.36798	0.714	0.411	0.0206166	C_3
AGAP003663		ATP-dependent RNA helicase DBP2 [Source:VB Community Annotation]	2.01501e-07	0.956583	0.964	0.571	0.00264591	C_3
AGAP002685	APG8	autophagy related gene [Source:VB Community Annotation]	7.42024e-13	1.18278	1	0.496	9.74352e-09	C_3
AGAP005528		Bax inhibitor 1-related	1.21769e-08	1.50352	0.786	0.384	0.000159895	C_3
AGAP009156		BRICHOS domain	2.18049e-06	0.878667	1	0.598	0.028632	C_3
AGAP010957		calmodulin [Source:VB Community Annotation]	9.01111e-07	0.754383	0.964	0.549	0.0118325	C_3
AGAP010392		calumenin [Source:VB Community Annotation]	2.26842e-09	1.10285	0.964	0.504	2.97867e-05	C_3
AGAP000790		Calycin-like	1.48798e-07	0.628295	1	0.746	0.00195386	C_3
AGAP010052		carbonic anhydrase [Source:VB Community Annotation]	3.15104e-06	1.71204	0.571	0.232	0.0413764	C_3
AGAP013509		carboxylesterase clade H%2C member 1 [Source:VB Community Annotation]	5.20152e-12	1.07223	1	0.621	6.83012e-08	C_3
AGAP006209		carboxypeptidase B [Source:VB Community Annotation]	1.33088e-07	1.74831	0.643	0.25	0.00174757	C_3
AGAP002414		carboxypeptidase D [Source:VB Community Annotation]	8.41629e-07	1.57883	0.714	0.348	0.0110514	C_3
AGAP004533		cathepsin B [Source:VB Community Annotation]	4.48025e-09	0.834662	0.964	0.612	5.88302e-05	C_3
AGAP003277		cathepsin D [Source:VB Community Annotation]	6.96936e-08	1.23942	0.821	0.446	0.000915147	C_3
AGAP002879		cathepsin F [Source:VB Community Annotation]	9.90354e-14	1.42497	1	0.562	1.30043e-09	C_3
AGAP011828	Cp1	cathepsin L [Source:VB Community Annotation]	9.10356e-13	1.29355	1	0.616	1.19539e-08	C_3
AGAP008527		CD63 antigen [Source:VB Community Annotation]	3.18667e-08	1.27823	0.821	0.446	0.000418442	C_3
AGAP009651		CD63 antigen [Source:VB Community Annotation]	6.80924e-10	1.15955	0.929	0.518	8.94121e-06	C_3
AGAP006921		CED6	6.17389e-08	1.06333	0.893	0.522	0.000810694	C_3
AGAP002440	Cdc42	cell division cycle Cdc42 homolog [Source:VB Community Annotation]	4.18975e-08	1.04479	0.893	0.496	0.000550157	C_3
AGAP007957		choline/ethanolamine kinase [Source:VB Community Annotation]	5.32801e-08	0.929812	0.929	0.625	0.000699622	C_3
AGAP005625	SCRASP1	Class A Scavenger Receptor (SRCR domain) with Serine Protease domain. [Source:VB Community Annotation]	8.48295e-10	1.2941	0.929	0.496	1.1139e-05	C_3
AGAP010133	SCRBQ2	Class B Scavenger Receptor (CD36 domain). [Source:VB Community Annotation]	1.2712e-08	1.35774	0.893	0.393	0.000166921	C_3
AGAP011974	SCRC1	Class C Scavenger Receptor (Sushi/SCR/CCP and Somatomedin B domains). [Source:VB Community Annotation]	2.19188e-10	1.01282	1	0.665	2.87816e-06	C_3
AGAP000290	CLIPA27	CLIPA	1.13032e-12	1.71671	0.893	0.379	1.48423e-08	C_3
AGAP002422	CLIPD1	CLIP-domain serine protease [Source:VB Community Annotation]	1.90434e-10	0.827371	1	0.728	2.50059e-06	C_3
AGAP013773		Coiled-coil domain containing protein 32	3.35173e-09	0.967406	0.857	0.335	4.40115e-05	C_3
AGAP009201		collagen type IV alpha [Source:VB Community Annotation]	3.90161e-07	0.720071	1	0.656	0.0051232	C_3
AGAP005849		colmedin [Source:VB Community Annotation]	4.12248e-09	0.945642	0.964	0.625	5.41323e-05	C_3
AGAP010347	CuSOD3	copper-zinc superoxide dismutase 3 [Source:VB Community Annotation]	1.75255e-09	0.954582	1	0.562	2.30127e-05	C_3
AGAP003304		CREG/Cellular Repressor of E1A- and JH-stimulated Genes	1.82597e-14	1.62549	0.964	0.397	2.39768e-10	C_3
AGAP003893		C-terminal-binding protein [Source:VB Community Annotation]	2.70207e-07	0.935942	0.964	0.612	0.00354809	C_3
AGAP002878		Cystatin-like protein [Source:VB Community Annotation]	3.44935e-06	1.02979	0.786	0.415	0.0452934	C_3
AGAP008727		cytochrome c oxidase subunit 4%2C mitochondrial precursor [Source:VB Community Annotation]	3.12221e-07	0.612664	0.964	0.518	0.00409977	C_3
AGAP011159	CoVa	cytochrome c oxidase subunit Va [Source:VB Community Annotation]	3.27677e-06	0.748866	0.893	0.5	0.0430273	C_3
AGAP012291	CYP9J3	cytochrome P450 [Source:VB Community Annotation]	9.60807e-12	2.4956	0.679	0.183	1.26164e-07	C_3
AGAP013128	CYP6AA2	cytochrome P450 [Source:VB Community Annotation]	1.01905e-09	2.10395	0.679	0.188	1.33812e-05	C_3
AGAP012292	CYP9J4	cytochrome P450 [Source:VB Community Annotation]	1.12114e-09	2.00593	0.679	0.219	1.47216e-05	C_3
AGAP002419	CYP4D22	cytochrome P450 [Source:VB Community Annotation]	1.88693e-07	1.9099	0.607	0.219	0.00247773	C_3
AGAP002862	CYP6AA1	cytochrome P450 [Source:VB Community Annotation]	1.00478e-09	1.73046	0.821	0.357	1.31938e-05	C_3
AGAP011157		cytosolic prostaglandin-E synthase [Source:VB Community Annotation]	3.46993e-06	1.02497	0.75	0.411	0.0455637	C_3
AGAP028120	D7L3	D7 long form salivary protein [Source:VB Community Annotation]	6.86074e-08	1.44873	0.75	0.393	0.000900884	C_3
AGAP008280	D7r5	D7 short form salivary protein [Source:VB Community Annotation]	3.57278e-07	1.30998	0.75	0.371	0.00469141	C_3
AGAP007609		DAZ associated protein 2	6.3013e-13	1.35441	1	0.5	8.27423e-09	C_3
AGAP001242		defective proboscis extension response [Source:VB Community Annotation]	3.83989e-08	1.60014	0.75	0.304	0.000504216	C_3
AGAP008762		DNA binding	2.42596e-09	1.22642	0.929	0.504	3.18553e-05	C_3
AGAP008432		DUF1279	9.625e-08	1.08805	0.786	0.397	0.00126386	C_3
AGAP006068		DUF229	1.389e-11	1.26796	1	0.562	1.8239e-07	C_3
AGAP004948		duplex-specific nuclease [Source:VB Community Annotation]	2.22541e-07	1.7394	0.679	0.317	0.00292219	C_3
AGAP029055	eater	Eater	7.23816e-10	1.14452	1	0.567	9.50443e-06	C_3
AGAP003767		Ecdysteroid kinase	9.80881e-10	0.968975	0.929	0.496	1.28799e-05	C_3
AGAP006771	eiger	eiger [Source:VB Community Annotation]	1.24731e-06	1.28736	0.75	0.433	0.0163784	C_3
AGAP011833		enoyl-CoA hydratase [Source:VB Community Annotation]	1.01407e-07	1.55605	0.714	0.308	0.00133158	C_3
AGAP012755		ER lumen protein retaining receptor [Source:VB Community Annotation]	3.51379e-06	1.03179	0.821	0.469	0.0461396	C_3
AGAP010225		ER lumen protein retaining receptor [Source:VB Community Annotation]	6.99129e-07	1.00005	0.893	0.496	0.00918026	C_3
AGAP028902	SSU_rRNA_eukarya	Eukaryotic small subunit ribosomal RNA [Source:RFAM%3BAcc:RF01960]	2.96877e-06	1.49819	0.321	0.054	0.0389829	C_3
AGAP006944	eIF3e	Eukaryotic translation initiation factor 3 subunit E [Source:UniProtKB/Swiss-Prot%3BAcc:Q7QIL8]	2.42704e-06	0.676017	0.857	0.487	0.0318694	C_3
AGAP009863		eukaryotic translation initiation factor 4A%2C isoform 2 [Source:VB Community Annotation]	2.99944e-09	0.781533	1	0.647	3.93857e-05	C_3
AGAP011334		Failed axon connections protein [Source:VB Community Annotation]	1.7602e-06	0.812345	0.857	0.625	0.0231132	C_3
AGAP010580		Farnesoic acid 0-methyl transferase	6.11178e-09	0.924259	1	0.58	8.02538e-05	C_3
AGAP012184		FK506-binding protein 1 [Source:VB Community Annotation]	6.51826e-07	0.681783	1	0.598	0.00855913	C_3
AGAP000523		F-type H+-transporting ATPase subunit c [Source:VB Community Annotation]	7.86122e-08	0.714378	0.964	0.549	0.00103226	C_3
AGAP007841		F-type H+-transporting ATPase subunit delta [Source:VB Community Annotation]	3.68338e-07	0.827015	0.929	0.491	0.00483665	C_3
AGAP006879		F-type H+-transporting ATPase subunit e [Source:VB Community Annotation]	5.67196e-07	0.786482	0.929	0.513	0.00744785	C_3
AGAP007966		F-type H+-transporting ATPase subunit gamma [Source:VB Community Annotation]	2.39325e-07	0.978575	0.893	0.473	0.00314258	C_3
AGAP005865		fumarylacetoacetase [Source:VB Community Annotation]	1.83877e-06	0.912809	0.821	0.397	0.0241448	C_3
AGAP004247	GPXH1	glutathione peroxidase 1 [Source:VB Community Annotation]	2.66686e-06	0.812949	0.857	0.473	0.0350186	C_3
AGAP000804	GPXH2	glutathione peroxidase 2 [Source:VB Community Annotation]	9.81698e-14	1.35335	1	0.46	1.28907e-09	C_3
AGAP009623	GAPDH	glyceraldehyde 3-phosphate dehydrogenase [Source:VB Community Annotation]	1.4664e-07	1.44541	0.714	0.339	0.00192552	C_3
AGAP001902	Rheb	GTP-binding protein Rheb [Source:VB Community Annotation]	1.81637e-06	2.1752	0.5	0.174	0.0238507	C_3
AGAP004098		GTP-binding protein SAR1 [Source:VB Community Annotation]	1.90472e-07	1.12929	0.857	0.487	0.00250108	C_3
AGAP010589		guanine nucleotide-binding protein subunit gamma [Source:VB Community Annotation]	9.74888e-08	1.05111	0.893	0.464	0.00128013	C_3
AGAP000807		helix-loop-helix transcription factor [Source:VB Community Annotation]	2.31372e-10	0.990611	1	0.576	3.03814e-06	C_3
AGAP009033	HPX2	heme peroxidase 2 [Source:VB Community Annotation]	7.99304e-08	1.87222	0.571	0.165	0.00104957	C_3
AGAP007237	HPX4	heme peroxidase 4 [Source:VB Community Annotation]	3.64867e-11	1.33692	0.964	0.576	4.79106e-07	C_3
AGAP002016		iron/zinc purple acid phosphatase-like protein precursor [Source:VB Community Annotation]	5.49101e-08	1.56555	0.75	0.335	0.000721025	C_3
AGAP007629	LANB2	laminin gamma 1 [Source:VB Community Annotation]	3.00916e-09	0.850333	1	0.696	3.95133e-05	C_3
AGAP004993		laminin subunit alpha [Source:VB Community Annotation]	1.22061e-06	0.602648	1	0.853	0.0160279	C_3
AGAP001381		laminin%2C beta 1 [Source:VB Community Annotation]	1.33602e-08	0.757853	0.964	0.737	0.000175433	C_3
AGAP004017	LRR8	Leucine rich repeat (LRR)	7.3007e-11	0.944016	1	0.652	9.58655e-07	C_3
AGAP006327	LRIM6	leucine-rich immune protein (Short) [Source:VB Community Annotation]	1.85664e-12	2.32349	0.75	0.223	2.43795e-08	C_3
AGAP007045	LRIM15	leucine-rich immune protein (TM) [Source:VB Community Annotation]	4.06306e-08	1.39479	0.786	0.397	0.000533521	C_3
AGAP028028	LRIM16A	leucine-rich immune protein (TM) [Source:VB Community Annotation]	1.5994e-09	0.895779	1	0.701	2.10017e-05	C_3
AGAP028064	LRIM16B	leucine-rich immune protein (TM) [Source:VB Community Annotation]	3.64547e-07	0.747847	0.964	0.683	0.00478686	C_3
AGAP004016		Leucine-rich repeats (LRRs)	2.53528e-09	0.82734	1	0.674	3.32908e-05	C_3
AGAP003475		leucyl aminopeptidase [Source:VB Community Annotation]	1.7166e-07	1.25254	0.786	0.384	0.00225406	C_3
AGAP000167		Lipid storage droplets surface-binding protein 2 [Source:VB Community Annotation]	2.74115e-11	1.47319	0.929	0.442	3.5994e-07	C_3
AGAP008521		low density lipoprotein receptor adapter protein 1 [Source:VB Community Annotation]	7.28334e-08	1.21038	0.857	0.46	0.000956376	C_3
AGAP028015		LRR	9.50726e-09	1.31496	0.929	0.429	0.00012484	C_3
AGAP003878		LRR TM	1.66804e-08	1.19436	0.893	0.518	0.00021903	C_3
AGAP008502		L-xylulose reductase [Source:VB Community Annotation]	3.85721e-09	1.45125	0.786	0.317	5.06491e-05	C_3
AGAP004431		Lysosomal transcription factor, NCU-G1	3.06465e-07	1.39991	0.75	0.388	0.00402419	C_3
AGAP009668		lysosomal-associated membrane protein 1/2 [Source:VB Community Annotation]	1.86632e-12	1.05006	1	0.594	2.45067e-08	C_3
AGAP011119		Lysozyme, I type	1.6865e-07	0.791902	0.893	0.504	0.00221454	C_3
AGAP009510		Malate dehydrogenase (Fragment) [Source:UniProtKB/TrEMBL%3BAcc:Q7PSB4]	2.85982e-08	1.45646	0.786	0.362	0.000375523	C_3
AGAP001372		MAP Jupiter	6.54501e-10	0.832932	1	0.638	8.59426e-06	C_3
AGAP006216	GPRMTH2	methuselah receptor 2 [Source:VB Community Annotation]	2.02569e-07	1.26627	0.821	0.42	0.00265993	C_3
AGAP000091		methylsterol monooxygenase [Source:VB Community Annotation]	4.44801e-07	1.9824	0.571	0.201	0.00584068	C_3
AGAP000092		methylsterol monooxygenase [Source:VB Community Annotation]	3.18888e-15	1.61796	1	0.424	4.18732e-11	C_3
AGAP004426		midline fasciclin	1.13348e-06	1.54138	0.679	0.33	0.0148837	C_3
AGAP004428		Midline fasciclin [Source:VB Community Annotation]	3.97613e-09	1.63262	0.821	0.397	5.22105e-05	C_3
AGAP005674		Miple [Source:VB Community Annotation]	7.34211e-15	1.68831	1	0.469	9.64093e-11	C_3
AGAP004031		mitochondrial electron transfer flavoprotein subunit alpha [Source:VB Community Annotation]	4.47723e-10	1.27341	0.929	0.415	5.87905e-06	C_3
AGAP010727		Mucin	6.28879e-07	0.659744	1	0.719	0.00825781	C_3
AGAP000241		N-acetylglucosamine kinase [Source:VB Community Annotation]	8.60887e-07	1.23582	0.75	0.353	0.0113043	C_3
AGAP003325		NADH dehydrogenase (ubiquinone) 1 alpha subcomplex 4 [Source:VB Community Annotation]	1.04438e-06	0.734431	0.964	0.585	0.0137137	C_3
AGAP009493	alpha9	nicotinic acetylcholine receptor subunit alpha 9 [Source:VB Community Annotation]	3.4218e-13	1.46298	0.964	0.455	4.49317e-09	C_3
AGAP028108		Niemann-Pick type C2 (Npc2) is a lysosomal protein in which a mutation in the gene causes a rare form of Niemann-Pick type C disease	3.87185e-09	1.36966	0.857	0.33	5.08413e-05	C_3
AGAP005608		NUCB1	2.83095e-08	1.36233	0.821	0.429	0.000371733	C_3
AGAP006278		Odorant-binding protein 99a - Drosophila melanogaster	6.97672e-09	0.9623	0.964	0.549	9.16113e-05	C_3
AGAP011034		Odz%2C odd Oz/ten-m homolog 1 [Source:VB Community Annotation]	3.56439e-08	0.830477	1	0.688	0.000468041	C_3
AGAP007638		oligosaccharyltransferase complex subunit delta (ribophorin II) [Source:VB Community Annotation]	8.10373e-08	1.16043	0.857	0.402	0.0010641	C_3
AGAP010131		ornithine decarboxylase antizyme 1 [Source:VB Community Annotation]	1.24057e-09	0.917932	0.964	0.585	1.62899e-05	C_3
AGAP000911		osteoclast differentiation	1.32854e-06	1.21593	0.714	0.357	0.0174451	C_3
AGAP005558		peptidase (mitochondrial processing) beta [Source:VB Community Annotation]	2.81562e-06	0.950729	0.821	0.455	0.0369718	C_3
AGAP006243		phosphatidylinositol-4%2C5-bisphosphate 4-phosphatase [Source:VB Community Annotation]	3.14797e-09	1.6286	0.786	0.371	4.1336e-05	C_3
AGAP001470		Phosphoinositide-dependent kinase 1	2.96979e-10	1.01632	1	0.647	3.89963e-06	C_3
AGAP004598		Phosphoserine aminotransferase [Source:UniProtKB/TrEMBL%3BAcc:Q5TRW7]	1.00388e-06	1.39186	0.679	0.299	0.0131819	C_3
AGAP001264		Plasma glutamate carboxypeptidase [Source:VB Community Annotation]	2.97844e-12	1.24432	1	0.527	3.91099e-08	C_3
AGAP010553		poly(U)-binding-splicing factor PUF60 [Source:VB Community Annotation]	2.99246e-09	1.27317	0.857	0.393	3.92941e-05	C_3
AGAP002599		polyubiquitin [Source:VB Community Annotation]	3.26117e-10	0.70938	1	0.621	4.28225e-06	C_3
AGAP007418		proteasome inhibitor subunit 1 (PI31) [Source:VB Community Annotation]	4.43776e-08	1.86372	0.643	0.241	0.000582722	C_3
AGAP007393		protein disulfide isomerase family A%2C member 3 [Source:VB Community Annotation]	1.40919e-07	0.844724	0.964	0.589	0.0018504	C_3
AGAP012407		protein disulfide-isomerase A1 [Source:VB Community Annotation]	2.05148e-08	0.740694	1	0.647	0.00026938	C_3
AGAP011166		protein phosphatase 1%2C catalytic subunit [Source:VB Community Annotation]	2.00118e-06	1.06004	0.821	0.438	0.0262775	C_3
AGAP002924		Protein tweety homolog [Source:UniProtKB/TrEMBL%3BAcc:F5HKF1]	3.62679e-11	1.13129	1	0.58	4.76234e-07	C_3
AGAP004596	PyK	pyruvate kinase [Source:VB Community Annotation]	3.63553e-06	1.18273	0.714	0.384	0.0477381	C_3
AGAP004146		Ras-related protein Rab-1A [Source:VB Community Annotation]	1.89922e-08	0.860913	0.929	0.585	0.000249387	C_3
AGAP001617		Ras-related protein Rab-7A [Source:VB Community Annotation]	2.24553e-06	1.00884	0.75	0.455	0.029486	C_3
AGAP009842		ribonuclease T2 [Source:VB Community Annotation]	1.53363e-06	1.88027	0.536	0.188	0.020138	C_3
AGAP001082		saposin [Source:VB Community Annotation]	4.79773e-12	0.982027	1	0.723	6.2999e-08	C_3
AGAP000358		Selenoprotein SelK/SelG	2.91634e-07	1.10001	0.821	0.429	0.00382945	C_3
AGAP008000		sepiapterin reductase [Source:VB Community Annotation]	2.21914e-07	0.762729	0.893	0.451	0.00291396	C_3
AGAP005246	SRPN10	serine protease inhibitor (serpin) 10 [Source:VB Community Annotation]	1.0986e-06	1.24028	0.75	0.406	0.0144257	C_3
AGAP009670	SRPN4	serine protease inhibitor (serpin) 4 [Source:VB Community Annotation]	8.95422e-11	1.11381	0.964	0.571	1.17578e-06	C_3
AGAP005914	SP11644	serine-type carboxypeptidase activity	9.2758e-09	1.66263	0.75	0.326	0.000121801	C_3
AGAP000852		Small ubiquitin-related modifier [Source:UniProtKB/TrEMBL%3BAcc:Q7PNJ2]	4.65692e-07	0.677083	1	0.598	0.00611501	C_3
AGAP007055		sodium-dependent dicarboxylate transporter sdcS [Source:VB Community Annotation]	1.10028e-07	1.10779	0.893	0.513	0.00144478	C_3
AGAP011940		sphingomyelin phosphodiesterase [Source:VB Community Annotation]	1.12323e-13	1.37192	1	0.585	1.47492e-09	C_3
AGAP012307		Spondin-1 [Source:VB Community Annotation]	8.48043e-14	1.44172	1	0.496	1.11357e-09	C_3
AGAP006100		syntaxin 8 [Source:VB Community Annotation]	8.31022e-07	1.7836	0.571	0.201	0.0109122	C_3
AGAP007209		Tetraspanin [Source:UniProtKB/TrEMBL%3BAcc:Q7PTA7]	9.13921e-08	0.855384	0.964	0.589	0.00120007	C_3
AGAP028038		Tetratricopeptide repeat domain	6.9075e-12	1.86152	0.821	0.29	9.07024e-08	C_3
AGAP028045		Tob (transducer of ErbB2)/antiproliferative gene family	2.54885e-06	1.77504	0.571	0.219	0.0334689	C_3
AGAP001064		Transmembrane emp24 domain-containing protein 10 precursor [Source:VB Community Annotation]	6.96643e-07	0.665804	0.964	0.598	0.00914762	C_3
AGAP010510		Tubulin beta chain [Source:UniProtKB/TrEMBL%3BAcc:Q7PPR6]	2.98082e-06	0.666192	0.929	0.603	0.0391411	C_3
AGAP008955		ubiquinol-cytochrome c reductase iron-sulfur subunit [Source:VB Community Annotation]	9.51467e-07	0.81359	0.857	0.522	0.0124937	C_3
AGAP010337		ubiquinol-cytochrome c reductase subunit 8 [Source:VB Community Annotation]	1.26616e-06	0.744395	0.929	0.478	0.0166259	C_3
AGAP011076		ubiquitin-conjugating enzyme E2 I [Source:VB Community Annotation]	1.70179e-09	1.16806	0.964	0.433	2.23462e-05	C_3
AGAP011984		UDP-N-acetyl-alpha-D-galactosamine:polypeptide N-acetylgalactosaminyltransferase 20 [Source:VB Community Annotation]	1.08157e-10	1.68266	0.857	0.362	1.42021e-06	C_3
AGAP003162		Unc-13 ortholog 4B	5.51893e-07	1.44338	0.714	0.335	0.0072469	C_3
AGAP007366		Uncharacterised protein family, CD034/YQF4	1.24403e-09	0.83627	0.964	0.576	1.63353e-05	C_3
AGAP007308		Unknown	1.25519e-08	2.6912	0.5	0.125	0.000164819	C_3
AGAP003657		Unknown	3.37612e-06	2.65479	0.286	0.049	0.0443319	C_3
AGAP011517		Unknown	1.41038e-07	2.27839	0.571	0.188	0.00185197	C_3
AGAP012813		Unknown	8.45417e-13	2.01912	0.821	0.29	1.11012e-08	C_3
AGAP001873		Unknown	3.24529e-06	1.84859	0.607	0.286	0.0426139	C_3
AGAP009672		Unknown	6.71483e-07	1.5373	0.714	0.335	0.00881724	C_3
AGAP001616		Unknown	1.94206e-06	1.44446	0.679	0.308	0.0255012	C_3
AGAP011727		Unknown	1.57304e-06	1.42307	0.536	0.174	0.0206556	C_3
AGAP000268		Unknown	2.90743e-11	1.40745	0.929	0.429	3.81775e-07	C_3
AGAP000385		Unknown	5.24572e-11	1.35168	0.964	0.522	6.88816e-07	C_3
AGAP028157		Unknown	2.56126e-10	1.33061	0.929	0.411	3.3632e-06	C_3
AGAP012944		Unknown	3.35141e-06	1.2996	0.679	0.286	0.0440073	C_3
AGAP012674		Unknown	9.68309e-09	1.29234	0.857	0.424	0.000127149	C_3
AGAP005820		Unknown	9.18553e-09	1.28923	0.857	0.424	0.000120615	C_3
AGAP008004		Unknown	5.56506e-08	1.17681	0.821	0.362	0.000730748	C_3
AGAP005611		Unknown	5.40895e-12	1.11814	1	0.554	7.10249e-08	C_3
AGAP011317		Unknown	1.48103e-07	1.07664	0.857	0.46	0.00194474	C_3
AGAP007312		Unknown	1.40594e-10	0.97345	1	0.576	1.84614e-06	C_3
AGAP028464		Unknown	1.9734e-07	0.83603	1	0.629	0.00259128	C_3
AGAP028439		Unknown	2.05179e-06	0.835848	0.893	0.571	0.0269421	C_3
AGAP001387		Unknown	8.22955e-07	0.652557	0.964	0.562	0.0108062	C_3
AGAP003879	VhaAC45	vacuolar H+ ATPase AC45 accessory subunit [Source:VB Community Annotation]	3.05944e-07	1.29718	0.75	0.397	0.00401736	C_3
AGAP003430	VhaM8.9	vacuolar H+ ATPase M8.9 accessory subunit [Source:VB Community Annotation]	2.20252e-06	1.01335	0.821	0.455	0.0289213	C_3
AGAP012357		Vanin-like protein 1 [Source:VB Community Annotation]	8.1858e-07	1.71711	0.643	0.254	0.0107488	C_3
AGAP002186		very low-density lipoprotein receptor [Source:VB Community Annotation]	1.92848e-11	1.07512	1	0.705	2.53228e-07	C_3
AGAP002401		V-type H+-transporting ATPase subunit E [Source:VB Community Annotation]	1.55324e-08	1.30246	0.893	0.388	0.000203956	C_3
AGAP003588	VATH	V-type H+-transporting ATPase subunit H [Source:VB Community Annotation]	2.27992e-08	1.42112	0.821	0.362	0.000299377	C_3
AGAP003711		V-type H+-transporting ATPase subunit I [Source:VB Community Annotation]	4.15793e-07	1.06247	0.893	0.585	0.00545978	C_3
AGAP005618		1%2C2-dihydroxy-3-keto-5-methylthiopentene dioxygenase [Source:UniProtKB/TrEMBL%3BAcc:Q7Q6X6]	7.55464e-09	0.956397	0.851	0.38	9.92e-05	C_4
AGAP011423		20S proteasome subunit beta 2 [Source:VB Community Annotation]	2.77426e-09	1.54562	0.638	0.229	3.64289e-05	C_4
AGAP001697		20S proteasome subunit beta 3 [Source:VB Community Annotation]	1.06993e-08	1.14429	0.723	0.283	0.000140492	C_4
AGAP008837		20S proteasome subunit beta 4 [Source:VB Community Annotation]	1.11938e-07	0.93184	0.745	0.307	0.00146986	C_4
AGAP010718		20S proteasome subunit beta 5 [Source:VB Community Annotation]	1.4323e-06	0.919746	0.681	0.312	0.0188075	C_4
AGAP004991		20S proteasome subunit beta 6 [Source:VB Community Annotation]	2.57748e-07	0.876134	0.702	0.307	0.00338449	C_4
AGAP011444		20S proteasome subunit beta 7 [Source:VB Community Annotation]	4.06145e-11	1.46958	0.745	0.229	5.33309e-07	C_4
AGAP012608		20S proteasome subunit beta 7 [Source:VB Community Annotation]	6.985e-11	1.3686	0.766	0.234	9.17201e-07	C_4
AGAP003851		26 proteasome complex subunit DSS1 [Source:VB Community Annotation]	1.52747e-06	0.675214	0.702	0.283	0.0200572	C_4
AGAP003935	Prosalpha1	26S proteasome alpha 1 subunit [Source:VB Community Annotation]	1.78021e-10	0.951224	0.894	0.351	2.3376e-06	C_4
AGAP001995	Prosalpha2	26S proteasome alpha 2 subunit [Source:VB Community Annotation]	1.02928e-09	0.982038	0.809	0.332	1.35155e-05	C_4
AGAP004960	Prosalpha3	26S proteasome alpha 3 subunit [Source:VB Community Annotation]	1.73825e-06	1.10658	0.66	0.298	0.022825	C_4
AGAP008816	Prosalpha5	26S proteasome alpha 5 subunit [Source:VB Community Annotation]	1.12803e-09	1.33616	0.745	0.273	1.48121e-05	C_4
AGAP010253	Prosalpha6	26S proteasome alpha 6 subunit [Source:VB Community Annotation]	1.23949e-06	1.05743	0.66	0.268	0.0162757	C_4
AGAP001973	Prosalpha7	26S proteasome alpha 7 subunit [Source:VB Community Annotation]	1.76488e-11	1.43232	0.723	0.229	2.31747e-07	C_4
AGAP009271	Prosbeta1	26S proteasome beta 1 subunit [Source:VB Community Annotation]	2.41739e-09	1.00332	0.851	0.376	3.17428e-05	C_4
AGAP008617		26S proteasome regulatory subunit N11 [Source:VB Community Annotation]	2.80159e-10	1.22734	0.766	0.283	3.67877e-06	C_4
AGAP002606		26S proteasome regulatory subunit N12 [Source:VB Community Annotation]	9.47119e-10	1.50678	0.681	0.244	1.24366e-05	C_4
AGAP012135		26S proteasome regulatory subunit N8 [Source:VB Community Annotation]	3.69678e-12	1.38508	0.723	0.21	4.85425e-08	C_4
AGAP001745		26S proteasome regulatory subunit RPN2 [Source:VB Community Annotation]	7.51626e-09	1.86802	0.532	0.166	9.8696e-05	C_4
AGAP003215		26S proteasome regulatory subunit T2 [Source:VB Community Annotation]	9.78124e-07	1.2802	0.468	0.146	0.0128437	C_4
AGAP003216		26S proteasome regulatory subunit T2 [Source:VB Community Annotation]	1.47249e-07	1.03392	0.638	0.22	0.00193353	C_4
AGAP003008		26S proteasome regulatory subunit T3 [Source:VB Community Annotation]	5.99143e-09	1.01236	0.702	0.244	7.86735e-05	C_4
AGAP001407		26S proteasome regulatory subunit T4 [Source:VB Community Annotation]	7.90371e-07	1.50993	0.489	0.18	0.0103784	C_4
AGAP011521		28 kDa heat-and acid-stable phosphoprotein [Source:VB Community Annotation]	8.94741e-07	1.30774	0.553	0.224	0.0117488	C_4
AGAP012136	mRpS25	28S ribosomal protein S25%2C mitochondrial [Source:VB Community Annotation]	9.80407e-07	1.81571	0.383	0.107	0.0128737	C_4
AGAP004055		2-oxoglutarate dehydrogenase E2 component (dihydrolipoamide succinyltransferas [Source:VB Community Annotation]	6.66257e-09	1.04276	0.745	0.332	8.74863e-05	C_4
AGAP011581	mRpL12	39S ribosomal protein L12%2C mitochondrial [Source:VB Community Annotation]	9.85226e-13	1.7123	0.745	0.215	1.2937e-08	C_4
AGAP009908	mRpL13	39S ribosomal protein L13%2C mitochondrial [Source:VB Community Annotation]	3.01255e-06	1.02194	0.574	0.22	0.0395578	C_4
AGAP011146	mRpL14	39S ribosomal protein L14%2C mitochondrial [Source:VB Community Annotation]	8.3523e-08	1.47225	0.404	0.088	0.00109674	C_4
AGAP002470	mRpL27	39S ribosomal protein L27%2C mitochondrial [Source:VB Community Annotation]	1.58121e-08	1.70419	0.489	0.137	0.000207629	C_4
AGAP000759	mRpL32	39S ribosomal protein L32%2C mitochondrial [Source:VB Community Annotation]	2.02258e-07	1.51241	0.404	0.102	0.00265585	C_4
AGAP002713	mRpL49	39S ribosomal protein L49%2C mitochondrial [Source:VB Community Annotation]	2.92827e-06	1.20555	0.489	0.176	0.0384512	C_4
AGAP005486	mRpL50	39S ribosomal protein L50%2C mitochondrial [Source:VB Community Annotation]	7.21275e-07	1.64239	0.426	0.127	0.00947106	C_4
AGAP003770	mRpL51	39S ribosomal protein L51%2C mitochondrial [Source:VB Community Annotation]	1.53074e-06	0.649927	0.511	0.18	0.0201002	C_4
AGAP001256		3'-phosphoadenosine 5'-phosphosulfate synthase [Source:VB Community Annotation]	3.73615e-06	0.742991	0.872	0.439	0.0490594	C_4
AGAP008001	RpS27a	40S ribosomal protein S27a [Source:VB Community Annotation]	9.17845e-07	0.820066	0.787	0.385	0.0120522	C_4
AGAP000415		5-hydroxyisourate hydrolase [Source:VB Community Annotation]	4.8911e-07	0.668122	0.979	0.459	0.0064225	C_4
AGAP005129		5'-methylthioadenosine phosphorylase [Source:VB Community Annotation]	3.93474e-08	1.52121	0.553	0.185	0.000516671	C_4
AGAP004002		60 kDa heat shock protein%2C mitochondrial precursor [Source:VB Community Annotation]	2.63928e-08	0.70877	0.766	0.312	0.000346563	C_4
AGAP012879	RpL18a-2	60S ribosomal protein L18a (partial) [Source:VB Community Annotation]	1.914e-09	1.02004	0.702	0.224	2.51327e-05	C_4
AGAP007635		60S ribosomal protein L7 [Source:VB Community Annotation]	1.07986e-11	1.36273	0.872	0.312	1.41796e-07	C_4
AGAP011329		acetyl-CoA C-acetyltransferase [Source:VB Community Annotation]	1.83935e-09	1.41135	0.617	0.21	2.41525e-05	C_4
AGAP007852		aconitate hydratase 1 / homoaconitase [Source:VB Community Annotation]	1.47356e-07	1.0581	0.766	0.361	0.00193493	C_4
AGAP001306		actin related protein 2/3 complex%2C subunit 4 [Source:VB Community Annotation]	8.418e-07	0.952313	0.702	0.337	0.0110537	C_4
AGAP008908		actin-related protein 2/3 complex subunit 1A [Source:VB Community Annotation]	7.65826e-08	1.16172	0.745	0.327	0.00100561	C_4
AGAP000752		acyl-CoA-binding domain-containing protein 6 [Source:VB Community Annotation]	2.45145e-06	0.683463	0.681	0.288	0.0321899	C_4
AGAP000719	Ahcy13	Adenosylhomocysteinase [Source:UniProtKB/Swiss-Prot%3BAcc:O76757]	1.84343e-10	0.888588	0.872	0.376	2.4206e-06	C_4
AGAP010175		adenylyl cyclase-associated protein 1 [Source:VB Community Annotation]	1.80784e-07	0.925921	0.723	0.356	0.00237388	C_4
AGAP003002		AdoMet-dependent rRNA methyltransferase [Source:VB Community Annotation]	3.8481e-08	1.44151	0.617	0.229	0.000505294	C_4
AGAP002931	Arf2	ADP-ribosylation factor 2 [Source:VB Community Annotation]	1.19389e-09	0.951062	0.894	0.385	1.56769e-05	C_4
AGAP000901		alanine transaminase [Source:VB Community Annotation]	1.11387e-06	0.921455	0.723	0.356	0.0146262	C_4
AGAP003652		aldehyde dehydrogenase (NAD+) [Source:VB Community Annotation]	2.35758e-09	1.34311	0.766	0.307	3.09574e-05	C_4
AGAP003578		aldehyde dehydrogenase (NAD+) [Source:VB Community Annotation]	6.47241e-07	0.879074	0.809	0.39	0.00849892	C_4
AGAP011050		aldehyde reductase [Source:VB Community Annotation]	1.15843e-09	1.12328	0.809	0.351	1.52113e-05	C_4
AGAP003408		aldose reductase [Source:VB Community Annotation]	2.41113e-07	0.977437	0.809	0.405	0.00316606	C_4
AGAP000760		alkylated DNA repair protein alkB homolog 7 [Source:VB Community Annotation]	2.17328e-06	1.98962	0.319	0.078	0.0285374	C_4
AGAP000862		alpha 1%2C3-glucosidase [Source:VB Community Annotation]	5.84886e-07	0.946381	0.723	0.356	0.00768014	C_4
AGAP008632		alpha-aminoadipic semialdehyde synthase [Source:VB Community Annotation]	1.43397e-06	0.847008	0.83	0.434	0.0188295	C_4
AGAP008883		Anamorsin homolog [Source:UniProtKB/Swiss-Prot%3BAcc:Q7PWQ6]	2.08288e-07	1.22994	0.596	0.215	0.00273502	C_4
AGAP003720		annexin A4 [Source:VB Community Annotation]	3.74325e-07	1.09109	0.681	0.263	0.00491526	C_4
AGAP003721	ANXB10B	annexin B10B [Source:VB Community Annotation]	2.8338e-06	0.914331	0.809	0.38	0.0372107	C_4
AGAP003722	ANXB10C	annexin B10C [Source:VB Community Annotation]	4.35659e-08	1.16759	0.681	0.244	0.000572064	C_4
AGAP009538	alpha-Adaptin	AP-2 complex subunit alpha [Source:UniProtKB/Swiss-Prot%3BAcc:Q7QG73]	1.003e-06	0.853005	0.702	0.312	0.0131704	C_4
AGAP005088		Armadillo-like helical	2.70652e-06	1.16755	0.574	0.249	0.0355393	C_4
AGAP005576		aspartyl-tRNA synthetase [Source:VB Community Annotation]	1.40999e-08	1.09692	0.787	0.322	0.000185146	C_4
AGAP002071	ABCD1	ATP-binding cassette transporter (ABC transporter) family D member 1 [Source:VB Community Annotation]	8.30843e-08	1.64205	0.511	0.166	0.00109098	C_4
AGAP002693	ABCF1	ATP-binding cassette transporter (ABC transporter) family F member 1 [Source:VB Community Annotation]	2.85132e-07	0.623913	0.809	0.39	0.00374407	C_4
AGAP003047		ATP-dependent RNA helicase [Source:VB Community Annotation]	1.59008e-06	0.870147	0.809	0.429	0.0208793	C_4
AGAP003663		ATP-dependent RNA helicase DBP2 [Source:VB Community Annotation]	8.68774e-07	0.704463	0.979	0.532	0.0114079	C_4
AGAP009075		ATP-dependent RNA helicase UAP56/SUB2 [Source:VB Community Annotation]	9.20124e-07	0.64338	0.851	0.483	0.0120821	C_4
AGAP012177		Aveugle [Source:VB Community Annotation]	4.411e-09	1.5551	0.617	0.2	5.79208e-05	C_4
AGAP005775		Bax inhibitor 1 [Source:VB Community Annotation]	1.05366e-06	0.772352	0.894	0.512	0.0138356	C_4
AGAP010557		B-cell receptor-associated protein 31 [Source:VB Community Annotation]	1.40648e-08	1.30594	0.702	0.268	0.000184684	C_4
AGAP001367		beta-1%2C3-glucuronyltransferase [Source:VB Community Annotation]	1.88407e-06	0.70589	0.894	0.502	0.0247397	C_4
AGAP011859		Beta-glucuronidase [Source:UniProtKB/TrEMBL%3BAcc:Q7PZE2]	3.65275e-06	0.755627	0.809	0.478	0.0479642	C_4
AGAP001423		Bifunctional purine biosynthesis protein [Source:VB Community Annotation]	2.77913e-06	0.732547	0.617	0.239	0.0364928	C_4
AGAP002107		calcyclin binding protein [Source:VB Community Annotation]	3.5319e-08	1.01096	0.723	0.268	0.000463774	C_4
AGAP010957		calmodulin [Source:VB Community Annotation]	3.52596e-08	0.716857	1	0.502	0.000462993	C_4
AGAP010392		calumenin [Source:VB Community Annotation]	3.33055e-07	0.826545	0.957	0.463	0.00437334	C_4
AGAP010191		calumenin isoform b precursor [Source:VB Community Annotation]	1.08883e-06	0.990439	0.638	0.268	0.0142974	C_4
AGAP003898		Cartilage-associated protein	2.28242e-07	1.29108	0.638	0.263	0.00299704	C_4
AGAP005569		casein kinase II subunit alpha [Source:VB Community Annotation]	5.76284e-11	1.50783	0.723	0.239	7.56719e-07	C_4
AGAP011438		Casein kinase II subunit beta [Source:UniProtKB/TrEMBL%3BAcc:A0NFB7]	1.41509e-10	1.36221	0.723	0.263	1.85815e-06	C_4
AGAP003277		cathepsin D [Source:VB Community Annotation]	6.58202e-09	1.03926	0.915	0.39	8.64285e-05	C_4
AGAP004484		CDGSH iron sulfur domain-containing protein 2 homolog [Source:VB Community Annotation]	1.81113e-06	0.893124	0.723	0.327	0.0237819	C_4
AGAP006921		CED6	2.21827e-07	0.737071	0.894	0.488	0.00291281	C_4
AGAP001285		charged multivesicular body protein 2A [Source:VB Community Annotation]	5.89972e-07	1.10976	0.66	0.288	0.00774693	C_4
AGAP003220		CHK kinase-like	6.63601e-09	1.68915	0.617	0.239	8.71375e-05	C_4
AGAP009444		chromobox protein 5 [Source:VB Community Annotation]	6.13092e-07	0.811675	0.745	0.361	0.00805051	C_4
AGAP005625	SCRASP1	Class A Scavenger Receptor (SRCR domain) with Serine Protease domain. [Source:VB Community Annotation]	2.68565e-09	0.947026	0.957	0.449	3.52653e-05	C_4
AGAP003021		Clathrin heavy chain [Source:UniProtKB/TrEMBL%3BAcc:Q7PQY9]	1.15629e-06	0.632806	0.915	0.566	0.0151832	C_4
AGAP001648	CLIPB17	CLIP-domain serine protease [Source:VB Community Annotation]	4.19034e-09	1.36465	0.723	0.268	5.50234e-05	C_4
AGAP009844	CLIPB15	CLIP-domain serine protease [Source:VB Community Annotation]	3.02319e-06	0.66233	0.766	0.385	0.0396975	C_4
AGAP001399		Coatomer subunit beta [Source:UniProtKB/TrEMBL%3BAcc:Q7PXG9]	6.44191e-08	1.40731	0.596	0.215	0.000845887	C_4
AGAP004668		coiled-coil domain-containing protein 12 [Source:VB Community Annotation]	4.03576e-08	1.39725	0.553	0.171	0.000529935	C_4
AGAP000375		Coiled-coil-helix-coiled-coil-helix domain-containing protein 3, mitochondrial	2.91849e-12	1.47011	0.809	0.273	3.83226e-08	C_4
AGAP010347	CuSOD3	copper-zinc superoxide dismutase 3 [Source:VB Community Annotation]	1.1146e-07	0.740659	0.979	0.527	0.00146358	C_4
AGAP006522		Copz1 protein [Source:VB Community Annotation]	1.19997e-08	1.16349	0.745	0.283	0.000157568	C_4
AGAP003304		CREG/Cellular Repressor of E1A- and JH-stimulated Genes	2.47034e-09	1.09166	0.894	0.361	3.2438e-05	C_4
AGAP006244		CTL-like protein 1 [Source:UniProtKB/Swiss-Prot%3BAcc:Q7Q5R7]	2.00462e-08	1.0324	0.723	0.293	0.000263227	C_4
AGAP002878		Cystatin-like protein [Source:VB Community Annotation]	1.19628e-07	0.906337	0.851	0.366	0.00157083	C_4
AGAP011846		cytochrome b-561 domain containing protein 2 [Source:VB Community Annotation]	3.19859e-06	0.994186	0.574	0.234	0.0420007	C_4
AGAP002245		cytochrome b-c1 complex subunit 6%2C mitochondrial [Source:VB Community Annotation]	1.31121e-07	0.856659	0.702	0.283	0.00172175	C_4
AGAP000851		cytochrome c oxidase subunit 6a%2C mitochrondrial [Source:VB Community Annotation]	5.05084e-08	0.658723	0.936	0.444	0.000663225	C_4
AGAP011159	CoVa	cytochrome c oxidase subunit Va [Source:VB Community Annotation]	3.72196e-09	0.800567	1	0.439	4.88731e-05	C_4
AGAP011157		cytosolic prostaglandin-E synthase [Source:VB Community Annotation]	1.62158e-09	1.0335	0.851	0.356	2.1293e-05	C_4
AGAP028120	D7L3	D7 long form salivary protein [Source:VB Community Annotation]	2.36387e-06	0.956997	0.745	0.361	0.0310399	C_4
AGAP011832		Death-associated protein 1 [Source:VB Community Annotation]	1.20646e-06	0.662306	0.851	0.449	0.015842	C_4
AGAP001242		defective proboscis extension response [Source:VB Community Annotation]	2.06659e-07	1.21037	0.681	0.278	0.00271365	C_4
AGAP006125		Density-regulated protein [Source:UniProtKB/TrEMBL%3BAcc:Q7Q5Z2]	1.41995e-06	0.962991	0.553	0.205	0.0186453	C_4
AGAP009288		Derlin-1 [Source:VB Community Annotation]	2.52335e-09	1.16498	0.787	0.293	3.31341e-05	C_4
AGAP000832		Derlin-2/3 [Source:VB Community Annotation]	2.11913e-06	0.951602	0.745	0.4	0.0278263	C_4
AGAP010624		Developmentally regulated GTP-binding protein [Source:VB Community Annotation]	3.5497e-08	1.21714	0.489	0.132	0.000466111	C_4
AGAP002534		dihydropteridine reductase [Source:VB Community Annotation]	1.52792e-06	0.942983	0.66	0.332	0.0200631	C_4
AGAP002375		DNA-directed RNA polymerase I subunit RPA12 [Source:VB Community Annotation]	8.8733e-11	2.59793	0.362	0.044	1.16515e-06	C_4
AGAP005873		DNA-directed RNA polymerases I%2C II%2C and III subunit RPABC2 [Source:VB Community Annotation]	1.12748e-10	1.1921	0.787	0.293	1.48049e-06	C_4
AGAP011761		DNA-directed RNA polymerases I%2C II%2C and III subunit RPABC5 [Source:VB Community Annotation]	9.03544e-09	1.25281	0.617	0.195	0.000118644	C_4
AGAP005981		DnaJ homolog subfamily A member 1 [Source:VB Community Annotation]	6.19585e-10	1.1615	0.809	0.288	8.13577e-06	C_4
AGAP002396		dolichyl-diphosphooligosaccharide--protein glycosyltransferase [Source:VB Community Annotation]	1.06569e-09	1.44011	0.745	0.302	1.39936e-05	C_4
AGAP000434		dolichyl-diphosphooligosaccharide--protein glycosyltransferase [Source:VB Community Annotation]	1.96868e-10	1.40063	0.787	0.288	2.58507e-06	C_4
AGAP000617		dual specificity phosphatase [Source:VB Community Annotation]	3.93499e-07	1.11401	0.596	0.229	0.00516703	C_4
AGAP013004		DUF1091	7.94646e-07	1.3105	0.596	0.249	0.0104345	C_4
AGAP003614		DUF788, TMEM208	4.86247e-07	1.46494	0.532	0.205	0.00638491	C_4
AGAP029055	eater	Eater	1.13479e-06	0.725782	0.936	0.541	0.0149009	C_4
AGAP004653		electron transfer flavoprotein subunit beta%2C mitochondrial [Source:VB Community Annotation]	8.55289e-07	0.93214	0.702	0.317	0.0112308	C_4
AGAP010612		elongation factor 1-beta [Source:VB Community Annotation]	4.64669e-09	0.796625	1	0.449	6.10157e-05	C_4
AGAP004235		elongation factor 1-delta [Source:VB Community Annotation]	2.68343e-11	0.83271	0.979	0.4	3.52361e-07	C_4
AGAP011833		enoyl-CoA hydratase [Source:VB Community Annotation]	1.6417e-06	1.16675	0.638	0.288	0.0215572	C_4
AGAP011972		Epoxide hydrolase [Source:VB Community Annotation]	3.53152e-07	1.29316	0.574	0.205	0.00463724	C_4
AGAP006625		epsilonCOP	1.04625e-07	1.26189	0.638	0.254	0.00137383	C_4
AGAP012755		ER lumen protein retaining receptor [Source:VB Community Annotation]	5.21081e-09	0.985978	0.936	0.41	6.84232e-05	C_4
AGAP010225		ER lumen protein retaining receptor [Source:VB Community Annotation]	2.46435e-07	0.87108	0.936	0.449	0.00323594	C_4
AGAP006729		Ester hydrolase C11orf54 [Source:VB Community Annotation]	2.90517e-06	1.17166	0.553	0.21	0.0381477	C_4
AGAP009494		ETS-type family%2C other [Source:VB Community Annotation]	1.54213e-06	1.24341	0.574	0.249	0.0202497	C_4
AGAP010310		eukaryotic peptide chain release factor subunit [Source:VB Community Annotation]	9.61222e-07	0.762329	0.787	0.366	0.0126218	C_4
AGAP028911	SSU_rRNA_eukarya	Eukaryotic small subunit ribosomal RNA [Source:RFAM%3BAcc:RF01960]	1.75942e-09	1.34189	0.596	0.166	2.31029e-05	C_4
AGAP028896	SSU_rRNA_eukarya	Eukaryotic small subunit ribosomal RNA [Source:RFAM%3BAcc:RF01960]	5.06394e-07	0.65561	0.787	0.312	0.00664946	C_4
AGAP011190		eukaryotic translation initiation factor 2 subunit alpha [Source:VB Community Annotation]	9.71806e-08	0.865611	0.745	0.322	0.00127608	C_4
AGAP007218		eukaryotic translation initiation factor 2%2C subunit 2 beta [Source:VB Community Annotation]	1.70729e-07	0.960514	0.787	0.38	0.00224185	C_4
AGAP002525		eukaryotic translation initiation factor 2A [Source:VB Community Annotation]	5.68738e-07	0.794536	0.851	0.439	0.0074681	C_4
AGAP002340	eIF3a	Eukaryotic translation initiation factor 3 subunit A [Source:UniProtKB/Swiss-Prot%3BAcc:Q7PGE8]	8.03006e-08	1.01504	0.66	0.229	0.00105443	C_4
AGAP012140	eIF3b	Eukaryotic translation initiation factor 3 subunit B [Source:UniProtKB/Swiss-Prot%3BAcc:Q7PZY1]	7.7548e-09	1.17697	0.745	0.366	0.000101828	C_4
AGAP004725	eIF3c	Eukaryotic translation initiation factor 3 subunit C [Source:UniProtKB/Swiss-Prot%3BAcc:Q7PMU8]	2.81042e-07	0.957997	0.66	0.263	0.00369036	C_4
AGAP002337	eIF3d	Eukaryotic translation initiation factor 3 subunit D [Source:UniProtKB/Swiss-Prot%3BAcc:Q7QBW3]	4.85218e-12	1.23785	0.872	0.337	6.3714e-08	C_4
AGAP007668	eIF3g	Eukaryotic translation initiation factor 3 subunit G [Source:UniProtKB/Swiss-Prot%3BAcc:Q7QJV0]	1.29295e-09	1.03938	0.894	0.376	1.69778e-05	C_4
AGAP009204	eIF3h	Eukaryotic translation initiation factor 3 subunit H [Source:UniProtKB/Swiss-Prot%3BAcc:Q7PVR3]	3.5655e-08	0.938849	0.766	0.322	0.000468186	C_4
AGAP006607	eIF3i	Eukaryotic translation initiation factor 3 subunit I [Source:UniProtKB/Swiss-Prot%3BAcc:Q7PP77]	6.56282e-08	1.05339	0.766	0.361	0.000861764	C_4
AGAP011580	eIF3k	Eukaryotic translation initiation factor 3 subunit K [Source:UniProtKB/Swiss-Prot%3BAcc:Q7QGK4]	6.0563e-11	0.977466	0.915	0.366	7.95252e-07	C_4
AGAP006130	eIF3l	Eukaryotic translation initiation factor 3 subunit L [Source:UniProtKB/Swiss-Prot%3BAcc:Q7Q5Y8]	3.03894e-09	1.02413	0.809	0.346	3.99043e-05	C_4
AGAP012281	eIF3m	Eukaryotic translation initiation factor 3 subunit M [Source:UniProtKB/Swiss-Prot%3BAcc:Q7Q068]	8.86267e-13	1.53118	0.83	0.293	1.16376e-08	C_4
AGAP009604		Farnesoic acid 0-methyl transferase	4.83941e-11	1.52398	0.681	0.2	6.35463e-07	C_4
AGAP011315		fatty-acid amide hydrolase 2 [Source:VB Community Annotation]	1.46519e-10	1.47817	0.681	0.215	1.92394e-06	C_4
AGAP005813		FeS cluster assembly scaffold IscU [Source:VB Community Annotation]	1.5712e-06	0.763277	0.851	0.41	0.0206315	C_4
AGAP004918		fibrinogen [Source:VB Community Annotation]	3.30931e-07	0.711701	0.936	0.507	0.00434546	C_4
AGAP007473		FK506-binding nuclear protein [Source:VB Community Annotation]	5.29178e-11	0.893132	0.915	0.4	6.94864e-07	C_4
AGAP003134		FK506-binding protein 2 [Source:VB Community Annotation]	1.34176e-06	1.043	0.66	0.268	0.0176187	C_4
AGAP011448	fen1	Flap endonuclease 1 [Source:UniProtKB/Swiss-Prot%3BAcc:Q7Q323]	2.09786e-07	1.81774	0.383	0.088	0.00275469	C_4
AGAP004916		FREP11	1.13671e-09	1.25564	0.83	0.356	1.49262e-05	C_4
AGAP005134		F-type H+-transporting ATPase subunit alpha [Source:VB Community Annotation]	1.04531e-08	0.822322	0.979	0.527	0.00013726	C_4
AGAP001138		F-type H+-transporting ATPase subunit b [Source:VB Community Annotation]	6.45064e-07	0.659832	0.957	0.502	0.00847034	C_4
AGAP012106		F-type H+-transporting ATPase subunit beta [Source:VB Community Annotation]	3.78588e-09	1.42888	0.617	0.2	4.97124e-05	C_4
AGAP012081		F-type H+-transporting ATPase subunit beta [Source:VB Community Annotation]	4.8997e-14	1.3034	0.936	0.317	6.4338e-10	C_4
AGAP007841		F-type H+-transporting ATPase subunit delta [Source:VB Community Annotation]	5.18253e-09	0.80177	0.957	0.444	6.80518e-05	C_4
AGAP007966		F-type H+-transporting ATPase subunit gamma [Source:VB Community Annotation]	9.74717e-08	0.776813	0.915	0.429	0.0012799	C_4
AGAP011634		Fumarylacetoacetate hydrolase domain containing 2A [Source:VB Community Annotation]	8.69509e-07	0.949433	0.553	0.22	0.0114175	C_4
AGAP004362		glutamate dehydrogenase (NAD(P)+) [Source:VB Community Annotation]	4.56931e-07	0.837827	0.766	0.41	0.00599996	C_4
AGAP007125		glutamate-rich WD repeat-containing protein 1 [Source:VB Community Annotation]	1.68085e-07	1.39419	0.489	0.156	0.00220713	C_4
AGAP011107	GRX1	glutaredoxin [Source:VB Community Annotation]	1.31403e-08	0.70593	0.894	0.371	0.000172545	C_4
AGAP000804	GPXH2	glutathione peroxidase 2 [Source:VB Community Annotation]	3.09222e-09	1.04937	0.979	0.415	4.06039e-05	C_4
AGAP005749	GSTO1	glutathione S-transferase omega class 1 [Source:VB Community Annotation]	6.21732e-08	0.806984	0.851	0.385	0.000816396	C_4
AGAP000947	GSTU1	glutathione S-transferase unclassified 1 [Source:VB Community Annotation]	1.61293e-06	0.982136	0.617	0.278	0.0211794	C_4
AGAP009623	GAPDH	glyceraldehyde 3-phosphate dehydrogenase [Source:VB Community Annotation]	1.72422e-10	1.41452	0.787	0.288	2.26407e-06	C_4
AGAP009979		glycoprotein-N-acetylgalactosamine 3-beta-galactosyltransferase [Source:VB Community Annotation]	5.63651e-09	1.53779	0.66	0.239	7.4013e-05	C_4
AGAP004098		GTP-binding protein SAR1 [Source:VB Community Annotation]	1.59285e-06	0.866268	0.872	0.449	0.0209157	C_4
AGAP010589		guanine nucleotide-binding protein subunit gamma [Source:VB Community Annotation]	3.07702e-08	0.903213	0.915	0.42	0.000404043	C_4
AGAP012204		H/ACA ribonucleoprotein complex subunit 2 [Source:VB Community Annotation]	3.5629e-12	0.919643	0.766	0.278	4.67844e-08	C_4
AGAP005149		H/ACA ribonucleoprotein complex subunit 3 [Source:VB Community Annotation]	1.30948e-08	0.872634	0.766	0.288	0.000171947	C_4
AGAP004739		H/ACA ribonucleoprotein complex subunit 4 [Source:VB Community Annotation]	4.66563e-12	1.2239	0.936	0.439	6.12643e-08	C_4
AGAP004583		heat shock 70kDa protein [Source:VB Community Annotation]	7.8454e-07	0.954748	0.723	0.307	0.0103018	C_4
AGAP004944		heat shock 70kDa protein 1/8 [Source:VB Community Annotation]	1.81182e-07	0.711952	0.872	0.41	0.0023791	C_4
AGAP004192		heat shock 70kDa protein 5 [Source:VB Community Annotation]	1.69841e-06	0.761982	0.936	0.517	0.0223018	C_4
AGAP000807		helix-loop-helix transcription factor [Source:VB Community Annotation]	5.55591e-07	0.67542	1	0.537	0.00729546	C_4
AGAP006353		Histidine triad nucleotide binding protein 1 [Source:VB Community Annotation]	2.21475e-06	0.975715	0.681	0.288	0.0290819	C_4
AGAP003228		histone acetyltransferase type B subunit 2 [Source:VB Community Annotation]	5.83096e-08	1.31704	0.617	0.229	0.000765664	C_4
AGAP012199		Histone H2B [Source:UniProtKB/Swiss-Prot%3BAcc:Q27442]	2.49095e-08	1.02717	0.787	0.298	0.000327086	C_4
AGAP012885		Histone H4 [Source:UniProtKB/TrEMBL%3BAcc:Q7PCX0]	1.60554e-09	0.961954	0.809	0.288	2.10823e-05	C_4
AGAP002521		hydroxybutyrate dehydrogenase [Source:VB Community Annotation]	7.07746e-08	1.39446	0.596	0.2	0.000929342	C_4
AGAP004606		HYPK [Source:VB Community Annotation]	3.39811e-06	0.971799	0.574	0.239	0.0446206	C_4
AGAP002032		hypothetical protein, possible vitellogenin	5.39215e-08	0.983396	0.872	0.429	0.000708043	C_4
AGAP011484		Ig-like	8.19726e-08	0.669208	0.915	0.385	0.00107638	C_4
AGAP003769		importin beta-3 [Source:VB Community Annotation]	7.5864e-08	1.004	0.766	0.307	0.000996171	C_4
AGAP001273		karyopherin (importin) alpha 4 [Source:VB Community Annotation]	6.45213e-07	1.05182	0.702	0.312	0.00847229	C_4
AGAP005291		La RNA-binding domain proteins similar to La-related proteins 1 and 2	8.39104e-09	1.19405	0.723	0.283	0.000110183	C_4
AGAP011938		lamin [Source:VB Community Annotation]	6.05353e-09	1.17905	0.766	0.317	7.94889e-05	C_4
AGAP005685		Learning associated protein 18-like	2.01877e-10	1.06993	0.894	0.38	2.65084e-06	C_4
AGAP005404		lectin%2C mannose-binding 1 [Source:VB Community Annotation]	1.35547e-07	1.38213	0.638	0.288	0.00177987	C_4
AGAP013186		Leucine rich repeat (LRR)	1.01623e-07	1.07241	0.766	0.322	0.00133441	C_4
AGAP000531		lipoyl(octanoyl) transferase [Source:VB Community Annotation]	5.76698e-08	2.04443	0.319	0.054	0.000757262	C_4
AGAP003878		LRR TM	7.55986e-07	0.815469	0.894	0.483	0.00992685	C_4
AGAP008952		lupus La protein [Source:VB Community Annotation]	8.99685e-08	1.01667	0.723	0.288	0.00118138	C_4
AGAP012126		lysophospholipase II [Source:VB Community Annotation]	3.08037e-06	1.51379	0.447	0.151	0.0404484	C_4
AGAP000994		lysosomal Pro-X carboxypeptidase [Source:VB Community Annotation]	2.56473e-08	1.1694	0.681	0.254	0.000336775	C_4
AGAP000325		lysyl-tRNA synthetase%2C class II [Source:VB Community Annotation]	1.88272e-08	1.4922	0.574	0.195	0.00024722	C_4
AGAP009510		Malate dehydrogenase (Fragment) [Source:UniProtKB/TrEMBL%3BAcc:Q7PSB4]	4.95391e-08	1.01797	0.787	0.322	0.000650498	C_4
AGAP004159		malate dehydrogenase (oxaloacetate-decarboxylating)(NADP+) [Source:VB Community Annotation]	2.98479e-07	1.8391	0.426	0.122	0.00391932	C_4
AGAP001939		maltase [Source:VB Community Annotation]	1.63182e-06	1.63247	0.383	0.107	0.0214274	C_4
AGAP003016		mesencephalic astrocyte-derived neurotrophic factor homolog [Source:VB Community Annotation]	1.26068e-06	0.665887	0.872	0.483	0.0165539	C_4
AGAP008150		Metaxin-2 [Source:VB Community Annotation]	5.08215e-07	1.69901	0.383	0.098	0.00667338	C_4
AGAP008345		methionyl aminopeptidase [Source:VB Community Annotation]	5.32305e-07	1.02255	0.617	0.239	0.00698969	C_4
AGAP006216	GPRMTH2	methuselah receptor 2 [Source:VB Community Annotation]	4.40802e-07	1.00389	0.787	0.39	0.00578817	C_4
AGAP004026	GPRMTH6	methuselah receptor 6 [Source:VB Community Annotation]	6.4951e-07	0.630926	0.851	0.468	0.00852872	C_4
AGAP005109		MICOS complex subunit MIC13 [Source:UniProtKB/TrEMBL%3BAcc:Q7Q9Q1]	2.70751e-10	1.29107	0.766	0.268	3.55523e-06	C_4
AGAP001502		mitochondrial 10 kDa heat shock protein [Source:VB Community Annotation]	8.69285e-11	0.959393	0.957	0.429	1.14146e-06	C_4
AGAP008724		mitochondrial cytochrome c oxidase subunit 5B isoform 1 [Source:VB Community Annotation]	4.50627e-09	0.610758	1	0.473	5.91719e-05	C_4
AGAP006936		mitochondrial cytochrome c1 heme protein [Source:VB Community Annotation]	7.3199e-08	0.800664	0.872	0.439	0.000961176	C_4
AGAP004031		mitochondrial electron transfer flavoprotein subunit alpha [Source:VB Community Annotation]	6.84878e-07	0.844898	0.83	0.39	0.00899313	C_4
AGAP002277		mitochondrial import inner membrane translocase subunit Tim13 [Source:VB Community Annotation]	1.11883e-10	1.2582	0.766	0.283	1.46913e-06	C_4
AGAP008086		mitochondrial processing peptidase [Source:VB Community Annotation]	1.68194e-06	0.948552	0.596	0.249	0.0220855	C_4
AGAP006996		mitochondrial translation elongation factor TU [Source:VB Community Annotation]	8.2763e-09	1.52981	0.617	0.229	0.000108676	C_4
AGAP010679	TIM10	mitochrondrial inner membrane translocase subunit TIM10 [Source:VB Community Annotation]	6.37036e-07	1.29111	0.553	0.21	0.00836492	C_4
AGAP012770		molecular chaperone GrpE [Source:VB Community Annotation]	4.68046e-07	1.26299	0.426	0.117	0.00614591	C_4
AGAP013112		mRNA binding protein [Source:VB Community Annotation]	3.69551e-07	1.69981	0.447	0.137	0.00485257	C_4
AGAP007644		mRNA turnover protein 4 [Source:VB Community Annotation]	2.84367e-08	1.37919	0.596	0.215	0.000373403	C_4
AGAP006575		multifunctional methyltransferase subunit TRM112 [Source:VB Community Annotation]	1.22114e-06	1.38067	0.489	0.176	0.0160348	C_4
AGAP007806		myosin light chain%2C invertebrate [Source:VB Community Annotation]	3.65543e-06	0.70627	0.723	0.38	0.0479995	C_4
AGAP012301		N4-(beta-N-acetylglucosaminyl)-L-asparaginase [Source:VB Community Annotation]	6.21761e-08	1.49552	0.596	0.22	0.000816435	C_4
AGAP004528		N-acyltransferase	3.42175e-06	0.713901	0.702	0.346	0.044931	C_4
AGAP001903	Mdh2	NAD-dependent malate dehydrogenase [Source:VB Community Annotation]	8.20578e-08	0.773352	0.787	0.366	0.0010775	C_4
AGAP006630		NADH dehydrogenase (ubiquinone) 1 alpha subcomplex 1 [Source:VB Community Annotation]	7.651e-07	0.755906	0.83	0.385	0.0100465	C_4
AGAP011130		NADH dehydrogenase (ubiquinone) 1 alpha subcomplex 10 [Source:VB Community Annotation]	5.05729e-08	1.36115	0.617	0.234	0.000664073	C_4
AGAP007208		NADH dehydrogenase (ubiquinone) 1 alpha subcomplex 11 [Source:VB Community Annotation]	1.62535e-06	0.613104	0.83	0.371	0.0213425	C_4
AGAP009652		NADH dehydrogenase (ubiquinone) 1 alpha subcomplex 13 [Source:VB Community Annotation]	4.97931e-07	0.817754	0.809	0.39	0.00653833	C_4
AGAP003325		NADH dehydrogenase (ubiquinone) 1 alpha subcomplex 4 [Source:VB Community Annotation]	3.78396e-08	0.643554	1	0.541	0.000496871	C_4
AGAP012705		NADH dehydrogenase (ubiquinone) 1 alpha subcomplex 7 [Source:VB Community Annotation]	2.60106e-10	1.71808	0.574	0.146	3.41545e-06	C_4
AGAP006918		NADH dehydrogenase (ubiquinone) 1 alpha subcomplex 8 [Source:VB Community Annotation]	1.15487e-07	1.11842	0.702	0.283	0.00151647	C_4
AGAP010792		NADH dehydrogenase (ubiquinone) 1 alpha subcomplex 9 [Source:VB Community Annotation]	2.14429e-06	0.998506	0.596	0.244	0.0281566	C_4
AGAP010464		NADH dehydrogenase (ubiquinone) 1 alpha/beta subcomplex 1 [Source:VB Community Annotation]	3.38021e-09	0.993068	0.809	0.332	4.43855e-05	C_4
AGAP000849		NADH dehydrogenase (ubiquinone) 1 beta subcomplex 1 [Source:VB Community Annotation]	7.65531e-10	0.965014	0.936	0.351	1.00522e-05	C_4
AGAP012374		NADH dehydrogenase (ubiquinone) 1 beta subcomplex 3 [Source:VB Community Annotation]	5.51366e-11	1.15574	0.894	0.351	7.23999e-07	C_4
AGAP011829		NADH dehydrogenase (ubiquinone) 1 beta subcomplex 4 [Source:VB Community Annotation]	5.45959e-09	1.00429	0.766	0.307	7.16899e-05	C_4
AGAP007297		NADH dehydrogenase (ubiquinone) 1 beta subcomplex 5 [Source:VB Community Annotation]	1.48771e-07	0.723167	0.809	0.361	0.00195351	C_4
AGAP009602		NADH dehydrogenase (ubiquinone) 1 beta subcomplex 6 [Source:VB Community Annotation]	4.35321e-08	0.828387	0.809	0.361	0.000571619	C_4
AGAP000794		NADH dehydrogenase (ubiquinone) Fe-S protein 2 [Source:VB Community Annotation]	8.33273e-11	1.2932	0.809	0.293	1.09417e-06	C_4
AGAP006456		NADH dehydrogenase (ubiquinone) Fe-S protein 3 [Source:VB Community Annotation]	4.78821e-10	1.17905	0.787	0.293	6.2874e-06	C_4
AGAP007082		NADH dehydrogenase (ubiquinone) Fe-S protein 4 [Source:VB Community Annotation]	1.76009e-06	0.706648	0.766	0.4	0.0231117	C_4
AGAP009824		NADH dehydrogenase (ubiquinone) Fe-S protein 5 [Source:VB Community Annotation]	5.96466e-07	0.673712	0.936	0.478	0.00783219	C_4
AGAP009072		NADH dehydrogenase (ubiquinone) Fe-S protein 6 [Source:VB Community Annotation]	2.86119e-06	1.29965	0.511	0.19	0.0375703	C_4
AGAP000170		NADH dehydrogenase (ubiquinone) Fe-S protein 7 [Source:VB Community Annotation]	8.8844e-10	1.09305	0.809	0.293	1.16661e-05	C_4
AGAP001711		NADH dehydrogenase (ubiquinone) Fe-S protein 8 [Source:VB Community Annotation]	4.77707e-07	0.701171	0.702	0.302	0.00627277	C_4
AGAP002170		NADH dehydrogenase (ubiquinone) flavoprotein 2 [Source:VB Community Annotation]	6.08188e-09	1.19674	0.66	0.244	7.98612e-05	C_4
AGAP002568		Nat13 protein [Source:VB Community Annotation]	1.99421e-10	1.4915	0.617	0.176	2.61859e-06	C_4
AGAP009493	alpha9	nicotinic acetylcholine receptor subunit alpha 9 [Source:VB Community Annotation]	4.55393e-09	0.978751	0.957	0.41	5.97976e-05	C_4
AGAP028108		Niemann-Pick type C2 (Npc2) is a lysosomal protein in which a mutation in the gene causes a rare form of Niemann-Pick type C disease	1.42635e-06	0.933231	0.702	0.317	0.0187294	C_4
AGAP012386	Nim C2	Nimrod C2	3.57609e-08	0.616821	0.979	0.556	0.000469577	C_4
AGAP006745		Ninjurin	5.09086e-09	1.0313	0.894	0.395	6.6848e-05	C_4
AGAP005608		NUCB1	5.2744e-07	0.887958	0.809	0.395	0.00692581	C_4
AGAP011309		nuclear GTP-binding protein [Source:VB Community Annotation]	4.51924e-07	1.01075	0.574	0.22	0.00593421	C_4
AGAP007024		nuclear transport factor 2 [Source:VB Community Annotation]	2.78642e-06	0.902706	0.702	0.302	0.0365885	C_4
AGAP010308		nucleolar complex protein 3 [Source:VB Community Annotation]	6.6051e-11	1.48648	0.596	0.151	8.67315e-07	C_4
AGAP013026		nucleolar protein 4	1.05628e-06	2.03253	0.277	0.049	0.01387	C_4
AGAP000270		nucleolar protein 53 [Source:VB Community Annotation]	2.47214e-08	1.5762	0.574	0.19	0.000324617	C_4
AGAP009179		nucleolar protein 6 [Source:VB Community Annotation]	1.68618e-09	1.7942	0.511	0.137	2.21412e-05	C_4
AGAP004395		nucleophosmin 3 [Source:VB Community Annotation]	1.04235e-06	0.613959	0.979	0.571	0.013687	C_4
AGAP001928		nucleosome assembly protein 1-like 1 [Source:VB Community Annotation]	2.04025e-08	0.680372	0.936	0.444	0.000267906	C_4
AGAP003398		nucleosome-remodeling factor 38 kDa subunit [Source:VB Community Annotation]	3.2998e-06	0.726013	0.766	0.38	0.0433297	C_4
AGAP011034		Odz%2C odd Oz/ten-m homolog 1 [Source:VB Community Annotation]	3.83871e-07	0.644819	0.979	0.663	0.00504061	C_4
AGAP005764		Oligosaccaryltransferase	1.49649e-08	0.838479	0.809	0.337	0.000196504	C_4
AGAP010174		oligosaccharyltransferase complex subunit alpha (ribophorin I) [Source:VB Community Annotation]	1.6908e-09	0.996341	0.872	0.38	2.22019e-05	C_4
AGAP006383		oligosaccharyltransferase complex subunit beta [Source:VB Community Annotation]	3.09224e-12	1.62289	0.787	0.288	4.06043e-08	C_4
AGAP007638		oligosaccharyltransferase complex subunit delta (ribophorin II) [Source:VB Community Annotation]	5.79303e-10	1.0768	0.872	0.356	7.60683e-06	C_4
AGAP008491		oligosaccharyltransferase complex subunit epsilon [Source:VB Community Annotation]	1.43371e-09	0.670585	0.957	0.39	1.8826e-05	C_4
AGAP010010		oligosaccharyltransferase complex subunit gamma [Source:VB Community Annotation]	4.59249e-10	1.0504	0.936	0.39	6.0304e-06	C_4
AGAP005558		peptidase (mitochondrial processing) beta [Source:VB Community Annotation]	3.24932e-07	0.847962	0.872	0.41	0.00426669	C_4
AGAP007112		Pescadillo homolog [Source:UniProtKB/Swiss-Prot%3BAcc:Q7QIX1]	9.6425e-10	1.05603	0.66	0.22	1.26616e-05	C_4
AGAP003586		Phosphate carrier%2C mitochondrial [Source:VB Community Annotation]	7.59878e-08	0.936077	0.851	0.366	0.000997796	C_4
AGAP013333		Phosphate carrier%2C mitochondrial [Source:VB Community Annotation]	8.34708e-08	0.649107	1	0.556	0.00109605	C_4
AGAP001470		Phosphoinositide-dependent kinase 1	1.87356e-06	0.676213	1	0.615	0.0246017	C_4
AGAP007202		poly(A) RNA binding	4.1567e-13	1.56361	0.83	0.293	5.45817e-09	C_4
AGAP011165		prefoldin [Source:VB Community Annotation]	7.49342e-11	1.15195	0.83	0.322	9.83961e-07	C_4
AGAP003416		prefoldin alpha subunit [Source:VB Community Annotation]	1.61895e-09	1.32475	0.702	0.244	2.12584e-05	C_4
AGAP006946		Prefoldin subunit 4 [Source:UniProtKB/TrEMBL%3BAcc:Q7QIM0]	2.18122e-12	1.55788	0.702	0.2	2.86415e-08	C_4
AGAP003662		Prenylated Rab acceptor protein 1 [Source:VB Community Annotation]	3.55689e-07	1.08538	0.66	0.278	0.00467055	C_4
AGAP000479		pre-rRNA-processing protein IPI3 [Source:VB Community Annotation]	7.97829e-07	1.62605	0.404	0.117	0.0104763	C_4
AGAP005432		programmed cell death protein 5 [Source:VB Community Annotation]	2.9166e-09	1.19838	0.787	0.322	3.82979e-05	C_4
AGAP009323		prohibitin 1 [Source:VB Community Annotation]	2.31691e-09	1.53288	0.617	0.195	3.04233e-05	C_4
AGAP009642		prohibitin 2 [Source:VB Community Annotation]	5.47224e-08	0.902997	0.681	0.302	0.00071856	C_4
AGAP005108		Proliferation-associated 2G4 [Source:VB Community Annotation]	4.00646e-07	0.920838	0.766	0.38	0.00526088	C_4
AGAP000971		prolyl 4-hydroxylase [Source:VB Community Annotation]	1.84e-06	1.07345	0.681	0.332	0.0241611	C_4
AGAP000414		prostaglandin reductase 1 [Source:VB Community Annotation]	2.31815e-07	0.953947	0.681	0.283	0.00304396	C_4
AGAP000308		proteasome activator subunit 3 (PA28 gamma) [Source:VB Community Annotation]	8.78908e-08	1.09172	0.766	0.366	0.00115409	C_4
AGAP009647		proteasome maturation protein [Source:VB Community Annotation]	5.02824e-09	0.741272	0.851	0.366	6.60258e-05	C_4
AGAP003462		protein arginine N-methyltransferase 1 [Source:VB Community Annotation]	7.2902e-08	0.891972	0.809	0.341	0.000957276	C_4
AGAP003476		protein BCP1 [Source:VB Community Annotation]	6.41912e-08	1.3339	0.553	0.185	0.000842895	C_4
AGAP011140		Protein canopy homolog 3 [Source:VB Community Annotation]	1.19769e-06	1.29101	0.617	0.268	0.0157268	C_4
AGAP003612		Protein CDV3	3.30135e-08	1.06323	0.723	0.312	0.0004335	C_4
AGAP007393		protein disulfide isomerase family A%2C member 3 [Source:VB Community Annotation]	9.35585e-08	0.716138	0.979	0.551	0.00122852	C_4
AGAP001919		protein disulfide-isomerase A6 [Source:VB Community Annotation]	9.66505e-07	0.850933	0.787	0.4	0.0126912	C_4
AGAP000705		protein DJ-1 [Source:VB Community Annotation]	1.64964e-08	1.09409	0.723	0.263	0.000216615	C_4
AGAP010755		protein mago nashi [Source:VB Community Annotation]	1.70866e-12	1.36094	0.83	0.288	2.24364e-08	C_4
AGAP011166		protein phosphatase 1%2C catalytic subunit [Source:VB Community Annotation]	9.0086e-09	0.942477	0.851	0.395	0.000118292	C_4
AGAP003183		protein transport protein SEC13 [Source:VB Community Annotation]	4.14454e-08	1.14832	0.702	0.259	0.00054422	C_4
AGAP001759		protein transport protein SEC23 [Source:VB Community Annotation]	7.81747e-07	0.682409	0.851	0.434	0.0102651	C_4
AGAP009182		protein transport protein SEC61 subunit alpha [Source:VB Community Annotation]	1.66991e-07	0.916061	0.851	0.41	0.00219276	C_4
AGAP011504		protein transport protein SEC61 subunit beta [Source:VB Community Annotation]	5.91954e-09	0.857295	0.936	0.449	7.77295e-05	C_4
AGAP000948		Protein YIPF [Source:UniProtKB/TrEMBL%3BAcc:A0NBS3]	2.93427e-06	0.994732	0.617	0.263	0.0385299	C_4
AGAP000457		protein-L-isoaspartate(D-aspartate) O-methyltransferase [Source:VB Community Annotation]	1.7723e-09	1.38484	0.638	0.215	2.32721e-05	C_4
AGAP004786		Pyruvate dehydrogenase E1 component subunit alpha [Source:UniProtKB/TrEMBL%3BAcc:Q7Q2S3]	3.68952e-08	1.57499	0.511	0.146	0.000484471	C_4
AGAP010025		Rab GDP dissociation inhibitor beta [Source:VB Community Annotation]	2.55303e-06	0.951109	0.681	0.322	0.0335238	C_4
AGAP008267		Ran GTPase-activating protein 1 [Source:VB Community Annotation]	9.66171e-07	1.25842	0.404	0.112	0.0126868	C_4
AGAP005445		Ras-related C3 botulinum toxin substrate [Source:VB Community Annotation]	2.71215e-07	1.0144	0.745	0.341	0.00356133	C_4
AGAP004559		Ras-related protein [Source:VB Community Annotation]	2.04148e-07	0.840129	0.787	0.415	0.00268067	C_4
AGAP009944		Retinal dehydrogenase 2 [Source:VB Community Annotation]	7.4305e-07	0.727772	0.723	0.337	0.00975699	C_4
AGAP002415		Rho GTPase activation protein	5.05334e-10	1.16061	0.745	0.259	6.63554e-06	C_4
AGAP004441		Ribosome biogenesis protein Nop16	8.05814e-10	1.55453	0.617	0.19	1.05811e-05	C_4
AGAP004556		ribosome biogenesis protein SSF1/2 [Source:VB Community Annotation]	3.05129e-06	1.83531	0.404	0.132	0.0400664	C_4
AGAP005202		RING-box protein 1 [Source:VB Community Annotation]	6.35785e-07	0.766223	0.83	0.39	0.0083485	C_4
AGAP009336		RNA recognition motif domain	6.81405e-14	1.55234	0.83	0.254	8.94753e-10	C_4
AGAP007325		RNA-binding protein 1	1.51098e-07	0.928784	0.766	0.332	0.00198407	C_4
AGAP001645		RNA-binding protein FUS [Source:VB Community Annotation]	9.61019e-08	1.2144	0.617	0.239	0.00126191	C_4
AGAP009570		RNA-binding protein with serine-rich domain 1 [Source:VB Community Annotation]	3.28934e-06	1.13587	0.553	0.224	0.0431924	C_4
AGAP011244		rRNA 2'-O-methyltransferase fibrillarin [Source:VB Community Annotation]	3.98025e-08	1.51991	0.532	0.18	0.000522646	C_4
AGAP004684		rRNA-processing protein CGR1 [Source:VB Community Annotation]	8.02898e-08	1.1367	0.638	0.254	0.00105429	C_4
AGAP010499	AD20590	S-(hydroxymethyl)glutathione dehydrogenase [Source:UniProtKB/TrEMBL%3BAcc:A0A1S4H465]	2.76425e-09	1.30126	0.723	0.263	3.62974e-05	C_4
AGAP002922		Secretory carrier-associated membrane protein [Source:UniProtKB/TrEMBL%3BAcc:Q7QD28]	3.90845e-08	1.29378	0.702	0.307	0.000513218	C_4
AGAP007967		selenide%2C water dikinase [Source:VB Community Annotation]	7.38754e-09	1.67001	0.574	0.185	9.70058e-05	C_4
AGAP000358		Selenoprotein SelK/SelG	3.28839e-08	0.935264	0.83	0.39	0.000431798	C_4
AGAP009202		selenoprotein T [Source:VB Community Annotation]	8.34928e-07	1.08479	0.638	0.302	0.0109634	C_4
AGAP011532		septin [Source:VB Community Annotation]	1.10967e-06	1.08464	0.66	0.273	0.0145711	C_4
AGAP007941		serine palmitoyltransferase [Source:VB Community Annotation]	6.88441e-13	1.64382	0.809	0.268	9.03992e-09	C_4
AGAP006204		Serine palmitoyltransferase-like	3.49669e-08	0.824614	0.723	0.312	0.00045915	C_4
AGAP006715		serine/threonine-protein kinase OSR1/STK39 [Source:VB Community Annotation]	7.15046e-08	2.04191	0.383	0.088	0.000938927	C_4
AGAP008265		seryl-tRNA synthetase [Source:VB Community Annotation]	1.7258e-07	0.935951	0.702	0.288	0.00226615	C_4
AGAP002520		short-chain dehydrogenease/reductase [Source:VB Community Annotation]	1.97878e-06	1.64059	0.404	0.122	0.0259834	C_4
AGAP004519		sideroflexin 1%2C2%2C3 [Source:VB Community Annotation]	3.01681e-09	1.26253	0.702	0.268	3.96137e-05	C_4
AGAP004296		signal peptidase complex subunit 1 [Source:VB Community Annotation]	1.31208e-07	0.724514	0.872	0.371	0.00172289	C_4
AGAP011842		signal peptidase complex subunit 2 [Source:VB Community Annotation]	2.61465e-11	1.05331	0.915	0.346	3.4333e-07	C_4
AGAP003069		signal peptidase%2C endoplasmic reticulum-type [Source:VB Community Annotation]	1.26621e-10	1.13625	0.915	0.395	1.66267e-06	C_4
AGAP006688		signal recognition particle receptor subunit beta [Source:VB Community Annotation]	1.41432e-08	1.44794	0.596	0.2	0.000185715	C_4
AGAP006895		signal recognition particle subunit SRP19 [Source:VB Community Annotation]	1.56462e-08	1.25969	0.681	0.244	0.00020545	C_4
AGAP003052		small glutamine-rich tetratricopeptide repeat-containing protein alpha [Source:VB Community Annotation]	2.8339e-06	1.0461	0.617	0.273	0.0372119	C_4
AGAP005523		small nuclear ribonucleoprotein B and B' [Source:VB Community Annotation]	5.8259e-08	1.2397	0.66	0.254	0.000764999	C_4
AGAP002658		small nuclear ribonucleoprotein polypeptide F [Source:VB Community Annotation]	4.43362e-08	1.28815	0.553	0.176	0.000582179	C_4
AGAP001701		Small ubiquitin-related modifier [Source:UniProtKB/TrEMBL%3BAcc:Q7PY16]	1.21487e-08	0.772929	0.915	0.4	0.000159525	C_4
AGAP002109		solute carrier family 31 (copper transporter)%2C member 1 [Source:VB Community Annotation]	2.74023e-06	0.858796	0.681	0.341	0.035982	C_4
AGAP008034		solute carrier family 39 (zinc transporter)%2C member 7 [Source:VB Community Annotation]	5.25162e-08	1.02865	0.745	0.307	0.00068959	C_4
AGAP006246		Sorcin [Source:VB Community Annotation]	1.15116e-08	0.971683	0.83	0.351	0.000151159	C_4
AGAP011126		spermidine synthase [Source:VB Community Annotation]	6.83923e-07	1.25376	0.574	0.21	0.00898059	C_4
AGAP012111		sphingolipid delta-4 desaturase [Source:VB Community Annotation]	6.17393e-08	1.64633	0.511	0.156	0.000810699	C_4
AGAP011940		sphingomyelin phosphodiesterase [Source:VB Community Annotation]	4.77547e-08	0.85952	1	0.546	0.000627066	C_4
AGAP002956		splicing factor U2AF 35 kDa subunit [Source:VB Community Annotation]	6.88587e-08	1.38759	0.574	0.195	0.000904184	C_4
AGAP002265		splicing factor%2C arginine/serine-rich 12 [Source:VB Community Annotation]	1.11951e-07	0.871207	0.809	0.376	0.00147003	C_4
AGAP012307		Spondin-1 [Source:VB Community Annotation]	2.08689e-10	1.14222	1	0.449	2.7403e-06	C_4
AGAP000399		squid [Source:VB Community Annotation]	3.3002e-07	0.797905	0.851	0.473	0.0043335	C_4
AGAP013440		SRA stem-loop-interacting RNA-binding protein%2C mitochondrial [Source:VB Community Annotation]	8.6736e-07	0.937628	0.553	0.195	0.0113893	C_4
AGAP007879		Steroid dehydrogenase [Source:VB Community Annotation]	2.26046e-06	1.91032	0.362	0.098	0.0296822	C_4
AGAP010188		stress-induced-phosphoprotein 1 [Source:VB Community Annotation]	9.20153e-08	0.656667	0.809	0.361	0.00120825	C_4
AGAP001749		Stromal cell-derived factor 2 [Source:VB Community Annotation]	3.09102e-08	1.23153	0.702	0.298	0.000405882	C_4
AGAP000618		succinate dehydrogenase (ubiquinone) membrane anchor subunit [Source:VB Community Annotation]	1.25355e-13	1.54778	0.851	0.263	1.64604e-09	C_4
AGAP012648		Sulfotransferase	1.08803e-10	1.47522	0.723	0.239	1.42869e-06	C_4
AGAP012647		sulfotransferase [Source:VB Community Annotation]	2.15086e-12	1.54608	0.745	0.21	2.8243e-08	C_4
AGAP009119		suppressor of tumorigenicity protein 13 [Source:VB Community Annotation]	5.95029e-11	1.47094	0.702	0.234	7.81333e-07	C_4
AGAP009569		syntenin-1 isoform 1 [Source:VB Community Annotation]	4.70965e-07	0.932447	0.809	0.38	0.00618424	C_4
AGAP004238		T-complex protein 1 subunit alpha [Source:VB Community Annotation]	2.04953e-08	1.10528	0.702	0.298	0.000269123	C_4
AGAP009694		T-complex protein 1 subunit beta [Source:VB Community Annotation]	6.30123e-11	0.902998	0.83	0.337	8.27415e-07	C_4
AGAP002762		T-complex protein 1 subunit eta [Source:VB Community Annotation]	6.73496e-08	0.97773	0.766	0.346	0.000884367	C_4
AGAP002759		T-complex protein 1 subunit gamma [Source:UniProtKB/TrEMBL%3BAcc:Q7QCQ5]	9.14188e-10	1.03501	0.894	0.366	1.20042e-05	C_4
AGAP010588		T-complex protein 1 subunit theta [Source:VB Community Annotation]	1.70765e-11	1.01679	0.809	0.298	2.24232e-07	C_4
AGAP003477		T-complex protein 1 subunit zeta [Source:VB Community Annotation]	1.57727e-08	0.888614	0.851	0.38	0.000207111	C_4
AGAP009505		T-complex protein 1%2C delta subunit [Source:VB Community Annotation]	2.74632e-11	1.2235	0.872	0.341	3.60619e-07	C_4
AGAP008249		T-complex protein%2C epsilon subunit [Source:VB Community Annotation]	1.26511e-09	1.13731	0.809	0.298	1.66122e-05	C_4
AGAP003598		template-activating factor I [Source:VB Community Annotation]	1.46695e-07	1.5095	0.489	0.161	0.00192625	C_4
AGAP028038		Tetratricopeptide repeat domain	1.23384e-06	1.09366	0.681	0.273	0.0162016	C_4
AGAP001136		tetratricopeptide repeat protein 35 [Source:VB Community Annotation]	2.1992e-10	1.5069	0.596	0.171	2.88777e-06	C_4
AGAP008368	TEP14	thioester-containing protein 14 [Source:VB Community Annotation]	3.60583e-06	0.908392	0.766	0.424	0.0473482	C_4
AGAP010816	TEP3	thioester-containing protein 3 [Source:VB Community Annotation]	2.0736e-07	0.968957	0.872	0.507	0.00272285	C_4
AGAP000396	TPX1	thioredoxin peroxidase 1 [Source:VB Community Annotation]	3.84969e-11	1.48857	0.66	0.2	5.05503e-07	C_4
AGAP005462		Thioredoxin-like	2.17819e-06	1.00891	0.617	0.254	0.0286018	C_4
AGAP011800		Transaldolase [Source:UniProtKB/TrEMBL%3BAcc:Q7PZ95]	7.78261e-10	0.895263	0.851	0.322	1.02193e-05	C_4
AGAP011535		transcription elongation factor B%2C polypeptide 1 [Source:VB Community Annotation]	1.64609e-09	1.48377	0.681	0.263	2.16148e-05	C_4
AGAP008612		transcription initiation factor TFIID subunit 10 [Source:VB Community Annotation]	3.28934e-06	1.01285	0.553	0.224	0.0431924	C_4
AGAP005630		transitional endoplasmic reticulum ATPase [Source:VB Community Annotation]	4.72243e-09	0.840208	0.83	0.361	6.20102e-05	C_4
AGAP011161		transketolase [Source:VB Community Annotation]	1.29082e-09	0.827097	0.872	0.366	1.69497e-05	C_4
AGAP003119		translation initiation factor 1A [Source:VB Community Annotation]	1.42204e-06	0.646416	0.979	0.498	0.0186728	C_4
AGAP001380		translation initiation factor 6 [Source:VB Community Annotation]	2.83912e-11	1.17521	0.851	0.346	3.72804e-07	C_4
AGAP012339		Translocase of outer mitochondrial membrane 20 homolog [Source:VB Community Annotation]	3.25581e-06	0.619916	0.872	0.454	0.0427521	C_4
AGAP001721		translocon-associated protein subunit alpha [Source:VB Community Annotation]	3.50941e-09	1.1989	0.787	0.337	4.60821e-05	C_4
AGAP005861		Translocon-associated protein subunit beta [Source:UniProtKB/TrEMBL%3BAcc:Q5TRB4]	8.06434e-09	0.998513	0.766	0.302	0.000105893	C_4
AGAP008761		translocon-associated protein subunit gamma [Source:VB Community Annotation]	5.82017e-07	0.961659	0.723	0.337	0.00764247	C_4
AGAP005529		Transmembrane BAX inhibitor motif-containing protein 4 [Source:VB Community Annotation]	3.02883e-07	0.951867	0.745	0.332	0.00397716	C_4
AGAP000949		transmembrane emp24 domain-containing protein 3 precursor [Source:VB Community Annotation]	5.38986e-07	1.18202	0.638	0.268	0.00707742	C_4
AGAP003553		Transmembrane emp24 protein transport domain containing 9 [Source:VB Community Annotation]	2.44104e-06	0.821992	0.83	0.405	0.0320533	C_4
AGAP001219	TUB4A	tubulin alpha-4A chain [Source:VB Community Annotation]	9.47137e-10	0.932261	0.851	0.307	1.24369e-05	C_4
AGAP001218		tubulin alpha-4A chain [Source:VB Community Annotation]	1.54738e-07	0.688968	0.872	0.366	0.00203187	C_4
AGAP012250		U11/U12 small nuclear ribonucleoprotein 35 kDa protein [Source:VB Community Annotation]	5.05064e-07	1.46486	0.34	0.073	0.006632	C_4
AGAP008325		U3 small nucleolar RNA-associated protein 23 [Source:VB Community Annotation]	8.54154e-08	2.1499	0.34	0.068	0.00112159	C_4
AGAP008163		U4/U6 small nuclear ribonucleoprotein SNU13 [Source:VB Community Annotation]	2.98982e-09	0.839423	0.894	0.371	3.92593e-05	C_4
AGAP009687		U6 snRNA-associated Sm-like protein LSm4 [Source:VB Community Annotation]	1.50386e-07	1.44475	0.511	0.156	0.00197472	C_4
AGAP006099		ubiquinol-cytochrome c reductase core subunit 2 [Source:VB Community Annotation]	2.63967e-08	1.01985	0.809	0.346	0.000346616	C_4
AGAP008955		ubiquinol-cytochrome c reductase iron-sulfur subunit [Source:VB Community Annotation]	1.38996e-07	0.750284	0.957	0.468	0.00182516	C_4
AGAP010337		ubiquinol-cytochrome c reductase subunit 8 [Source:VB Community Annotation]	3.16523e-09	0.686564	0.957	0.429	4.15626e-05	C_4
AGAP004710		ubiquinol-cytochrome c reductase subunit 9 [Source:VB Community Annotation]	1.1901e-07	0.691704	0.809	0.351	0.00156272	C_4
AGAP012113		ubiquitin carboxyl-terminal hydrolase L3 [Source:VB Community Annotation]	8.42545e-12	1.54869	0.702	0.21	1.10635e-07	C_4
AGAP001364		Ubiquitin-fold modifier 1 [Source:UniProtKB/Swiss-Prot%3BAcc:Q7PXE2]	8.78406e-10	1.22696	0.702	0.239	1.15344e-05	C_4
AGAP002389		ubiquitin-like 4A [Source:VB Community Annotation]	1.21783e-06	1.40913	0.468	0.156	0.0159913	C_4
AGAP012261		UDP-glucose 4-epimerase [Source:VB Community Annotation]	1.42427e-07	1.4496	0.574	0.205	0.00187021	C_4
AGAP011984		UDP-N-acetyl-alpha-D-galactosamine:polypeptide N-acetylgalactosaminyltransferase 20 [Source:VB Community Annotation]	6.15487e-07	1.13717	0.723	0.346	0.00808196	C_4
AGAP004158		UDP-sugar diphosphatase [Source:VB Community Annotation]	4.49051e-09	1.72998	0.574	0.19	5.89649e-05	C_4
AGAP003968		UMP-CMP kinase [Source:UniProtKB/TrEMBL%3BAcc:Q7Q292]	2.04561e-06	0.729255	0.702	0.356	0.0268609	C_4
AGAP002604		Unknown	5.7927e-08	2.46191	0.277	0.039	0.000760639	C_4
AGAP012617		Unknown	1.69194e-06	2.16727	0.191	0.02	0.0222169	C_4
AGAP005683		Unknown	9.01045e-08	1.82568	0.489	0.166	0.00118316	C_4
AGAP001707		Unknown	1.62007e-06	1.76268	0.404	0.122	0.0212732	C_4
AGAP012865		Unknown	2.27054e-08	1.75786	0.404	0.088	0.000298144	C_4
AGAP002390		Unknown	7.82149e-11	1.58548	0.66	0.2	1.02704e-06	C_4
AGAP012911		Unknown	2.84419e-06	1.57584	0.34	0.083	0.0373471	C_4
AGAP013252		Unknown	4.06334e-09	1.50051	0.638	0.224	5.33558e-05	C_4
AGAP028604		Unknown	2.62257e-09	1.45403	0.681	0.239	3.44369e-05	C_4
AGAP012813		Unknown	5.71066e-11	1.44556	0.787	0.249	7.49867e-07	C_4
AGAP012831		Unknown	3.69522e-06	1.389	0.404	0.117	0.0485219	C_4
AGAP004748		Unknown	1.52279e-09	1.29087	0.702	0.234	1.99958e-05	C_4
AGAP012475		Unknown	1.54661e-08	1.20316	0.66	0.229	0.000203086	C_4
AGAP005820		Unknown	8.61651e-10	1.1766	0.915	0.371	1.13143e-05	C_4
AGAP012587		Unknown	2.58378e-07	1.15039	0.638	0.244	0.00339276	C_4
AGAP008524		Unknown	6.25175e-08	1.14619	0.66	0.259	0.000820917	C_4
AGAP003126		Unknown	1.11123e-08	1.14027	0.702	0.254	0.000145915	C_4
AGAP008747		Unknown	1.41247e-06	1.13902	0.362	0.088	0.0185472	C_4
AGAP012674		Unknown	4.90798e-10	1.11842	0.915	0.371	6.44467e-06	C_4
AGAP012798		Unknown	2.83815e-08	1.10414	0.745	0.268	0.000372678	C_4
AGAP000268		Unknown	1.63568e-09	1.03242	0.936	0.38	2.14782e-05	C_4
AGAP012522		Unknown	3.367e-08	0.969373	0.723	0.283	0.000442121	C_4
AGAP011567		Unknown	1.39179e-06	0.866784	0.702	0.278	0.0182756	C_4
AGAP000669		Unknown	1.00811e-08	0.855576	0.936	0.4	0.000132375	C_4
AGAP000385		Unknown	1.32757e-07	0.85305	0.915	0.493	0.00174323	C_4
AGAP007575		Unknown	2.65314e-07	0.842373	0.745	0.332	0.00348384	C_4
AGAP011733		Unknown	1.73847e-07	0.832518	0.681	0.259	0.00228278	C_4
AGAP011317		Unknown	5.77227e-07	0.816053	0.851	0.424	0.00757957	C_4
AGAP001718		Unknown	1.61716e-07	0.791286	0.936	0.517	0.0021235	C_4
AGAP028439		Unknown	1.94298e-06	0.718948	0.957	0.527	0.0255133	C_4
AGAP007312		Unknown	8.23829e-08	0.689835	1	0.537	0.00108177	C_4
AGAP003864		Unknown	2.81749e-06	0.654464	0.809	0.361	0.0369965	C_4
AGAP010320		UPF0172	1.66683e-06	1.37672	0.489	0.171	0.0218871	C_4
AGAP005935		UPF0197	3.97885e-07	0.659177	0.894	0.41	0.00522462	C_4
AGAP005380		UPF0220	4.76014e-08	1.08907	0.787	0.366	0.000625053	C_4
AGAP003155		UPF0483 protein AGAP003155 [Source:VB Community Annotation]	1.49442e-12	1.94674	0.638	0.166	1.96232e-08	C_4
AGAP000931		UPF0729 protein AGAP000931 [Source:UniProtKB/Swiss-Prot%3BAcc:Q7PSY2]	1.94397e-09	1.36753	0.638	0.21	2.55263e-05	C_4
AGAP001257		UTP--glucose-1-phosphate uridylyltransferase [Source:VB Community Annotation]	5.31e-07	1.47234	0.511	0.185	0.00697256	C_4
AGAP003430	VhaM8.9	vacuolar H+ ATPase M8.9 accessory subunit [Source:VB Community Annotation]	3.69701e-09	1.00506	0.894	0.405	4.85455e-05	C_4
AGAP002338		vacuolar protein sorting 29 homolog [Source:VB Community Annotation]	2.60324e-07	0.718618	0.851	0.395	0.00341832	C_4
AGAP002401		V-type H+-transporting ATPase subunit E [Source:VB Community Annotation]	1.53608e-08	0.968264	0.83	0.356	0.000201703	C_4
AGAP004867		V-type H+-transporting ATPase subunit G [Source:VB Community Annotation]	2.76836e-07	0.844065	0.851	0.385	0.00363513	C_4
AGAP003711		V-type H+-transporting ATPase subunit I [Source:VB Community Annotation]	3.10723e-06	0.688965	0.915	0.551	0.040801	C_4
AGAP011797		Wbp2 ortholog	7.16074e-08	0.899544	0.787	0.351	0.000940277	C_4
AGAP008286		WD repeat-containing protein 55 homolog [Source:VB Community Annotation]	1.62191e-06	1.57901	0.468	0.161	0.0212973	C_4
AGAP001037		Xaa-Pro aminopeptidase [Source:VB Community Annotation]	2.45256e-06	1.72371	0.447	0.161	0.0322046	C_4
AGAP004775		Xaa-Pro dipeptidase [Source:VB Community Annotation]	8.92787e-07	0.896811	0.83	0.439	0.0117232	C_4
AGAP006108		Y-box protein	1.55279e-07	0.813692	0.872	0.41	0.00203896	C_4
AGAP005602		zinc finger protein 706 [Source:VB Community Annotation]	2.4672e-06	0.770771	0.723	0.327	0.0323969	C_4
AGAP003328			3.18858e-06	2.21706	0.149	0.01	0.0418693	C_4
AGAP028370	ATP6	adenosine triphosphatase subunit 6 [Source:European Nucleotide Archive%3BAcc:ATP6]	2.87018e-22	2.86961	1	0.981	3.76884e-18	C_5
AGAP028369	ATP8	adenosine triphosphatase subunit 8 [Source:European Nucleotide Archive%3BAcc:ATP8]	3.054e-22	3.0732	1	0.86	4.0102e-18	C_5
AGAP028387	CYTB	cytochrome b [Source:European Nucleotide Archive%3BAcc:CYTB]	3.15556e-22	2.86328	1	0.986	4.14356e-18	C_5
AGAP028364	COX1	cytochrome c oxidase subunit I [Source:European Nucleotide Archive%3BAcc:COX1]	3.63674e-22	2.82058	1	0.995	4.7754e-18	C_5
AGAP028366	COX2	cytochrome c oxidase subunit II [Source:European Nucleotide Archive%3BAcc:COX2]	3.22811e-22	2.86601	1	0.967	4.23883e-18	C_5
AGAP028371	COX3	cytochrome c oxidase subunit III [Source:European Nucleotide Archive%3BAcc:COX3]	2.93927e-22	2.84297	1	0.986	3.85956e-18	C_5
AGAP004936		EGF repeats	1.58017e-08	1.48358	0.868	0.981	0.000207492	C_5
AGAP007406		Elongation factor 1-alpha [Source:UniProtKB/TrEMBL%3BAcc:Q7PT29]	3.10107e-09	1.86812	0.842	0.953	4.07202e-05	C_5
AGAP028941	LSU_rRNA_eukarya	Eukaryotic large subunit ribosomal RNA [Source:RFAM%3BAcc:RF02543]	1.17435e-17	2.15505	0.947	1	1.54203e-13	C_5
AGAP028825	LSU_rRNA_eukarya	Eukaryotic large subunit ribosomal RNA [Source:RFAM%3BAcc:RF02543]	4.98061e-15	2.02388	0.921	0.977	6.54004e-11	C_5
AGAP028918	LSU_rRNA_eukarya	Eukaryotic large subunit ribosomal RNA [Source:RFAM%3BAcc:RF02543]	9.48054e-12	1.73484	0.868	1	1.24489e-07	C_5
AGAP011197	FBN9	FBN9	9.18281e-07	1.60529	0.842	0.883	0.012058	C_5
AGAP002076		heat shock 70kDa protein 1/8 [Source:VB Community Annotation]	1.42748e-07	1.53211	0.816	0.874	0.00187443	C_5
AGAP028391	lsu rRNA	lsu rRNA	3.63648e-22	2.86848	1	0.986	4.77506e-18	C_5
AGAP028389	ND1	NADH dehydrogenase subunit 1 [Source:European Nucleotide Archive%3BAcc:ND1]	4.52728e-18	2.69352	0.947	0.949	5.94477e-14	C_5
AGAP028360	ND2	NADH dehydrogenase subunit 2 [Source:European Nucleotide Archive%3BAcc:ND2]	3.04293e-20	3.15646	0.974	0.874	3.99567e-16	C_5
AGAP028373	ND3	NADH dehydrogenase subunit 3 [Source:European Nucleotide Archive%3BAcc:ND3]	5.51952e-20	2.93095	0.974	0.925	7.24768e-16	C_5
AGAP028382	ND4	NADH dehydrogenase subunit 4 [Source:European Nucleotide Archive%3BAcc:ND4]	4.62426e-18	2.6529	0.947	0.949	6.07212e-14	C_5
AGAP028383	ND4L	NADH dehydrogenase subunit 4L [Source:European Nucleotide Archive%3BAcc:ND4L]	3.15419e-16	2.68873	0.921	0.907	4.14177e-12	C_5
AGAP028380	ND5	NADH dehydrogenase subunit 5 [Source:European Nucleotide Archive%3BAcc:ND5]	5.10315e-20	2.8797	0.974	0.963	6.70094e-16	C_5
AGAP028386	ND6	NADH dehydrogenase subunit 6 [Source:European Nucleotide Archive%3BAcc:ND6]	4.21565e-22	3.1483	1	0.869	5.53557e-18	C_5
AGAP029054	NimB2	nimrod B2 [Source:VB Community Annotation]	6.16112e-10	1.55526	0.974	0.981	8.09016e-06	C_5
AGAP028393	ssu rRNA	ssu rRNA	2.59164e-20	3.11514	0.974	0.813	3.40309e-16	C_5
AGAP028378	tRNA-Glu	Unknown	3.50527e-07	3.67687	0.368	0.093	0.00460277	C_5
AGAP028377	tRNA-Ser	Unknown	6.27582e-09	3.31453	0.658	0.369	8.24078e-05	C_5
AGAP028361	tRNA-Trp	Unknown	3.71238e-07	3.26457	0.5	0.201	0.00487472	C_5
AGAP028376	tRNA-Asn	Unknown	1.34237e-08	3.19229	0.605	0.29	0.000176266	C_5
AGAP028375	tRNA-Ala	Unknown	8.79631e-09	2.90175	0.658	0.369	0.000115504	C_5
AGAP028374	tRNA-Arg	Unknown	1.57336e-10	2.88226	0.763	0.523	2.06598e-06	C_5
AGAP028372	tRNA-Gly	Unknown	3.6405e-06	2.8529	0.605	0.425	0.0478034	C_5
AGAP000739	RpS10	40S ribosomal protein S10 [Source:VB Community Annotation]	2.01483e-14	0.916428	0.977	0.737	2.64568e-10	C_6
AGAP009998	RpS11	40S ribosomal protein S11 [Source:UniProtKB/Swiss-Prot%3BAcc:P52812]	2.43656e-18	1.1679	1	0.722	3.19945e-14	C_6
AGAP011077	RpS12	40S ribosomal protein S12 [Source:UniProtKB/TrEMBL%3BAcc:Q7PSP8]	5.00494e-17	1.12323	0.977	0.737	6.57199e-13	C_6
AGAP005947	RpS13	40S ribosomal protein S13 [Source:UniProtKB/Swiss-Prot%3BAcc:P52811]	1.30147e-15	0.990047	0.977	0.689	1.70896e-11	C_6
AGAP000655	RpS14-1	40S ribosomal protein S14a [Source:UniProtKB/Swiss-Prot%3BAcc:Q7QEH1]	5.31859e-14	1.12904	0.93	0.665	6.98384e-10	C_6
AGAP002346	RpS14-2	40S ribosomal protein S14b [Source:UniProtKB/Swiss-Prot%3BAcc:Q7QBX2]	2.78635e-16	1.20946	0.93	0.627	3.65875e-12	C_6
AGAP001274	RpS15	40S ribosomal protein S15 [Source:VB Community Annotation]	2.65595e-15	0.961307	0.977	0.737	3.48753e-11	C_6
AGAP000541	RpS15a-1	40S ribosomal protein S15a [Source:VB Community Annotation]	5.0534e-14	1.04167	0.953	0.703	6.63562e-10	C_6
AGAP011424	RpS16	40S ribosomal protein S16 [Source:VB Community Annotation]	3.40967e-15	1.02731	0.977	0.742	4.47723e-11	C_6
AGAP004887	RpS17	40S ribosomal protein S17 [Source:UniProtKB/Swiss-Prot%3BAcc:Q9U9L1]	1.28317e-15	0.99859	1	0.794	1.68494e-11	C_6
AGAP028693	RpS18	40S ribosomal protein S18 [Source:VB Community Annotation]	5.39237e-14	0.893254	0.977	0.751	7.08072e-10	C_6
AGAP010933	RpS19	40S ribosomal protein S19 [Source:VB Community Annotation]	4.94369e-14	0.971822	0.953	0.722	6.49156e-10	C_6
AGAP003768	RpS2	40S ribosomal protein S2 [Source:VB Community Annotation]	1.33586e-15	0.936118	1	0.804	1.75412e-11	C_6
AGAP010591	RpS20	40S ribosomal protein S20 [Source:VB Community Annotation]	1.84021e-14	0.871098	0.977	0.727	2.41638e-10	C_6
AGAP009431	RpS21	40S ribosomal protein S21 [Source:UniProtKB/TrEMBL%3BAcc:Q7PTN4]	1.65633e-18	1.29401	1	0.708	2.17493e-14	C_6
AGAP012990	RpS23	40S ribosomal protein S23 [Source:VB Community Annotation]	2.56593e-16	0.994674	1	0.761	3.36932e-12	C_6
AGAP005131	RpS24	40S ribosomal protein S24 [Source:UniProtKB/TrEMBL%3BAcc:Q7PQ02]	1.62707e-16	0.922501	1	0.746	2.1365e-12	C_6
AGAP004462	RpS25	40S ribosomal protein S25 [Source:VB Community Annotation]	9.99377e-17	1.04356	1	0.756	1.31228e-12	C_6
AGAP012100	RpS26	40S ribosomal protein S26 [Source:UniProtKB/Swiss-Prot%3BAcc:Q9GT45]	3.68975e-16	0.976269	1	0.761	4.84501e-12	C_6
AGAP007157	RpS27	40S ribosomal protein S27 [Source:UniProtKB/TrEMBL%3BAcc:Q7PT96]	3.17775e-17	1.09067	0.977	0.679	4.1727e-13	C_6
AGAP013742		40S ribosomal protein S27a [Source:VB Community Annotation]	2.76379e-14	0.833247	0.977	0.756	3.62913e-10	C_6
AGAP003412	RpS28	40S ribosomal protein S28 [Source:VB Community Annotation]	4.31663e-11	1.1857	0.86	0.608	5.66816e-07	C_6
AGAP001595	RpS29	40S ribosomal protein S29 [Source:VB Community Annotation]	8.22867e-15	1.37451	0.907	0.632	1.08051e-10	C_6
AGAP001910	RpS3	40S ribosomal protein S3 [Source:VB Community Annotation]	2.81341e-13	0.949964	0.953	0.708	3.69429e-09	C_6
AGAP000654	RpS30	40S ribosomal protein S30 [Source:UniProtKB/TrEMBL%3BAcc:Q7QEH2]	9.7578e-18	1.14395	1	0.78	1.2813e-13	C_6
AGAP003532	RpS3a	40S ribosomal protein S3a [Source:UniProtKB/Swiss-Prot%3BAcc:P52813]	3.96921e-15	0.805718	1	0.833	5.21196e-11	C_6
AGAP006871	RpS4	40S ribosomal protein S4 [Source:UniProtKB/TrEMBL%3BAcc:Q7PT95]	6.5075e-14	0.900754	0.977	0.761	8.545e-10	C_6
AGAP008329	RpS5	40S ribosomal protein S5 [Source:VB Community Annotation]	9.48684e-19	1.2016	1	0.708	1.24572e-14	C_6
AGAP002919	RpS6	40S ribosomal protein S6 [Source:VB Community Annotation]	2.09097e-12	0.750437	0.977	0.737	2.74565e-08	C_6
AGAP010592	S7	40S ribosomal protein S7 [Source:UniProtKB/Swiss-Prot%3BAcc:P33514]	2.66208e-14	1.06155	0.93	0.684	3.49558e-10	C_6
AGAP002437	RpS8	40S ribosomal protein S8 [Source:UniProtKB/TrEMBL%3BAcc:Q7QC42]	1.67508e-13	0.745881	1	0.785	2.19955e-09	C_6
AGAP005061	RpS9	40S ribosomal protein S9 [Source:VB Community Annotation]	8.76647e-18	1.17124	1	0.684	1.15112e-13	C_6
AGAP011777	RpSA	40S ribosomal protein SA [Source:UniProtKB/Swiss-Prot%3BAcc:Q7PZ81]	2.30926e-15	0.879158	1	0.742	3.03229e-11	C_6
AGAP000953	RpL10-1	60S ribosomal protein L10-1 [Source:VB Community Annotation]	7.33755e-13	0.956532	0.93	0.689	9.63494e-09	C_6
AGAP002395	RpL10-2	60S ribosomal protein L10-2 [Source:VB Community Annotation]	1.08941e-14	0.917032	0.977	0.727	1.4305e-10	C_6
AGAP011298	RpL10a	60S ribosomal protein L10a [Source:VB Community Annotation]	1.21095e-13	0.953476	0.953	0.751	1.5901e-09	C_6
AGAP011173	RpL11	60S ribosomal protein L11 [Source:VB Community Annotation]	7.99511e-15	0.945013	0.977	0.746	1.04984e-10	C_6
AGAP010065	RpL12	60S ribosomal protein L12 [Source:VB Community Annotation]	6.59832e-17	1.03951	0.977	0.722	8.66425e-13	C_6
AGAP001805	RpL13	60S ribosomal protein L13 [Source:UniProtKB/TrEMBL%3BAcc:Q7PUQ7]	1.06319e-16	1.03126	1	0.742	1.39608e-12	C_6
AGAP010257	RpL13a	60S ribosomal protein L13a [Source:VB Community Annotation]	1.65879e-14	0.911571	1	0.809	2.17816e-10	C_6
AGAP005991	RpL14	60S ribosomal protein L14 [Source:VB Community Annotation]	4.67068e-16	0.992574	1	0.732	6.13307e-12	C_6
AGAP004919	RpL15	60S ribosomal protein L15 [Source:UniProtKB/Swiss-Prot%3BAcc:P52818]	9.43039e-15	1.00159	0.953	0.699	1.2383e-10	C_6
AGAP001459	RpL17	60S ribosomal protein L17 [Source:UniProtKB/Swiss-Prot%3BAcc:A0NGY0]	1.65812e-15	0.952402	1	0.785	2.17728e-11	C_6
AGAP007580	RpL18	60S ribosomal protein L18 [Source:UniProtKB/Swiss-Prot%3BAcc:Q7QJM5]	9.87901e-14	0.865246	0.953	0.703	1.29721e-09	C_6
AGAP012284	RpL18a-1	60S ribosomal protein L18a [Source:UniProtKB/TrEMBL%3BAcc:Q7PV82]	3.99512e-14	0.852807	0.953	0.722	5.24599e-10	C_6
AGAP004422	RpL19	60S ribosomal protein L19 [Source:VB Community Annotation]	7.65328e-18	1.14131	1	0.737	1.00495e-13	C_6
AGAP012138	RpL21	60S ribosomal protein L21 [Source:VB Community Annotation]	7.72411e-15	1.07564	0.953	0.718	1.01425e-10	C_6
AGAP005046	RpL22	60S ribosomal protein L22 [Source:VB Community Annotation]	2.00227e-18	1.20053	1	0.699	2.62918e-14	C_6
AGAP010252	RpL23	60S ribosomal protein L23 [Source:VB Community Annotation]	1.78976e-16	1.13776	0.977	0.718	2.35013e-12	C_6
AGAP006037	RpL24	60S ribosomal protein L24 [Source:VB Community Annotation]	3.42831e-16	0.889598	1	0.756	4.50171e-12	C_6
AGAP010216	RpL25	60S ribosomal protein L25 [Source:VB Community Annotation]	1.75848e-11	1.03242	0.884	0.651	2.30905e-07	C_6
AGAP002468	RpL26	60S ribosomal protein L26 [Source:VB Community Annotation]	2.37424e-14	0.861986	1	0.751	3.11762e-10	C_6
AGAP011687	RpL27	60S ribosomal protein L27 [Source:UniProtKB/TrEMBL%3BAcc:Q5TMJ9]	7.21284e-15	0.916053	1	0.799	9.47118e-11	C_6
AGAP011706	RpL27a	60S ribosomal protein L27a [Source:VB Community Annotation]	1.27163e-15	1.05145	0.977	0.742	1.66977e-11	C_6
AGAP005427	RpL28	60S ribosomal protein L28 [Source:VB Community Annotation]	2.99591e-15	1.00713	1	0.732	3.93393e-11	C_6
AGAP006612	RpL29	60S ribosomal protein L29 [Source:VB Community Annotation]	7.0992e-18	1.34752	0.977	0.651	9.32197e-14	C_6
AGAP003556	RpL3	60S ribosomal protein L3 [Source:VB Community Annotation]	1.05497e-13	0.956983	0.977	0.742	1.38529e-09	C_6
AGAP003816	RpL30	60S ribosomal protein L30 [Source:VB Community Annotation]	5.28952e-16	1.11978	0.977	0.708	6.94567e-12	C_6
AGAP011896	RpL31	60S ribosomal protein L31 [Source:VB Community Annotation]	5.65066e-16	0.997258	0.977	0.694	7.41988e-12	C_6
AGAP002122	RpL32	60S ribosomal protein L32 [Source:VB Community Annotation]	1.12135e-13	1.01361	0.953	0.708	1.47244e-09	C_6
AGAP009324	RpL34	60S ribosomal protein L34 [Source:VB Community Annotation]	8.49158e-18	1.17594	1	0.713	1.11503e-13	C_6
AGAP001408	RpL35	60S ribosomal protein L35 [Source:VB Community Annotation]	3.41631e-16	1.15053	0.953	0.67	4.48595e-12	C_6
AGAP002754	RpL35a	60S ribosomal protein L35a [Source:VB Community Annotation]	1.28427e-12	0.752232	0.977	0.789	1.68637e-08	C_6
AGAP002921	RpL36	60S ribosomal protein L36 [Source:UniProtKB/TrEMBL%3BAcc:Q7PQY8]	2.13239e-16	1.07061	1	0.737	2.80004e-12	C_6
AGAP003538	RpL36a	60S ribosomal protein L36a [Source:VB Community Annotation]	2.24378e-18	1.27778	1	0.694	2.94631e-14	C_6
AGAP000952	RpL37	60S ribosomal protein L37 [Source:VB Community Annotation]	7.95246e-14	0.739227	1	0.794	1.04424e-09	C_6
AGAP009920	RpL37a	60S ribosomal protein L37a [Source:VB Community Annotation]	3.90217e-17	1.25563	0.977	0.718	5.12394e-13	C_6
AGAP010163	RpL38	60S ribosomal protein L38 [Source:UniProtKB/Swiss-Prot%3BAcc:Q7Q0U1]	4.96395e-17	1.07587	1	0.742	6.51816e-13	C_6
AGAP011802	RpL39	60S ribosomal protein L39 [Source:VB Community Annotation]	1.65002e-14	1.13102	0.953	0.684	2.16664e-10	C_6
AGAP002306	RpL4	60S ribosomal protein L4 [Source:VB Community Annotation]	1.61782e-13	0.871558	0.977	0.737	2.12436e-09	C_6
AGAP007927	RpL40	60S ribosomal protein L40 [Source:VB Community Annotation]	1.3897e-15	1.09262	0.977	0.722	1.82482e-11	C_6
AGAP007087	RpL41	60s ribosomal protein L41 [Source:UniProtKB/TrEMBL%3BAcc:Q52P89]	4.16792e-15	0.911089	1	0.799	5.47289e-11	C_6
AGAP009031	RpL5	60S ribosomal protein L5 [Source:VB Community Annotation]	2.83029e-14	1.10734	0.953	0.713	3.71645e-10	C_6
AGAP001911	RpL6	60S ribosomal protein L6 [Source:VB Community Annotation]	8.8337e-11	0.807632	0.93	0.713	1.15995e-06	C_6
AGAP008916	RpL7	60S ribosomal protein L7 [Source:VB Community Annotation]	4.22628e-14	0.767742	1	0.813	5.54953e-10	C_6
AGAP005960	RpL7a	60S ribosomal protein L7a [Source:UniProtKB/Swiss-Prot%3BAcc:O76732]	4.43594e-14	0.929749	0.977	0.766	5.82483e-10	C_6
AGAP005802	RpL8	60S ribosomal protein L8 [Source:UniProtKB/Swiss-Prot%3BAcc:Q9U9L2]	2.17694e-15	0.866585	1	0.789	2.85854e-11	C_6
AGAP009508	RpL9	60S ribosomal protein L9 [Source:VB Community Annotation]	6.8022e-18	1.07992	1	0.713	8.93197e-14	C_6
AGAP003592	RpLP0	60S ribosomal protein LP0 [Source:VB Community Annotation]	8.39391e-14	0.657282	1	0.837	1.1022e-09	C_6
AGAP007740	RpLP1	60S ribosomal protein LP1 [Source:VB Community Annotation]	4.23376e-16	0.959084	1	0.804	5.55935e-12	C_6
AGAP003025	RpLp2	60S ribosomal protein LP2 [Source:VB Community Annotation]	6.20503e-16	1.0626	0.977	0.751	8.14783e-12	C_6
AGAP000651	Actin5C	Actin-5C [Source:UniProtKB/Swiss-Prot%3BAcc:P84185]	3.0318e-13	0.792263	1	0.88	3.98105e-09	C_6
AGAP001662		ADAM-TS Spacer 1	1.01549e-07	0.956078	0.907	0.746	0.00133344	C_6
AGAP012014	Arf1	ADP-ribosylation factor 1 [Source:VB Community Annotation]	1.69672e-08	0.92169	0.884	0.78	0.000222796	C_6
AGAP028235	Arthropod_7SK	Arthropod 7SK RNA [Source:RFAM%3BAcc:RF01052]	3.59025e-08	1.67928	0.512	0.167	0.000471436	C_6
AGAP004212	Crc	calreticulin [Source:VB Community Annotation]	3.8589e-11	1.08281	0.953	0.675	5.06712e-07	C_6
AGAP000790		Calycin-like	1.50214e-07	0.727068	0.884	0.751	0.00197246	C_6
AGAP011974	SCRC1	Class C Scavenger Receptor (Sushi/SCR/CCP and Somatomedin B domains). [Source:VB Community Annotation]	2.08134e-07	0.956191	0.884	0.665	0.002733	C_6
AGAP012056		cofilin [Source:VB Community Annotation]	3.02859e-08	1.10808	0.791	0.651	0.000397684	C_6
AGAP009201		collagen type IV alpha [Source:VB Community Annotation]	1.10996e-09	1.11238	0.93	0.646	1.45749e-05	C_6
AGAP009200		collagen type IV alpha [Source:VB Community Annotation]	1.23042e-12	1.09305	0.977	0.77	1.61566e-08	C_6
AGAP004400		CYTC oxidase, subunit 8	1.72807e-07	1.10989	0.767	0.651	0.00226913	C_6
AGAP000883		elongation factor 1-gamma [Source:VB Community Annotation]	4.98725e-08	1.02151	0.814	0.67	0.000654876	C_6
AGAP009441		elongation factor 2 [Source:VB Community Annotation]	6.6752e-13	0.827484	0.977	0.828	8.7652e-09	C_6
AGAP028998	LSU_rRNA_eukarya	Eukaryotic large subunit ribosomal RNA [Source:RFAM%3BAcc:RF02543]	2.97413e-08	1.6102	0.674	0.354	0.000390533	C_6
AGAP028951	LSU_rRNA_eukarya	Eukaryotic large subunit ribosomal RNA [Source:RFAM%3BAcc:RF02543]	3.76774e-06	1.30999	0.581	0.301	0.0494742	C_6
AGAP028970	LSU_rRNA_eukarya	Eukaryotic large subunit ribosomal RNA [Source:RFAM%3BAcc:RF02543]	5.84482e-13	1.29939	0.884	0.598	7.67483e-09	C_6
AGAP028925	LSU_rRNA_eukarya	Eukaryotic large subunit ribosomal RNA [Source:RFAM%3BAcc:RF02543]	8.39035e-07	0.78792	0.814	0.746	0.0110174	C_6
AGAP028997	SSU_rRNA_eukarya	Eukaryotic small subunit ribosomal RNA [Source:RFAM%3BAcc:RF01960]	1.59455e-06	1.18504	0.744	0.612	0.020938	C_6
AGAP029038	SSU_rRNA_eukarya	Eukaryotic small subunit ribosomal RNA [Source:RFAM%3BAcc:RF01960]	3.23054e-09	1.16944	0.837	0.632	4.24202e-05	C_6
AGAP028980	SSU_rRNA_eukarya	Eukaryotic small subunit ribosomal RNA [Source:RFAM%3BAcc:RF01960]	2.28298e-07	1.10318	0.767	0.608	0.00299778	C_6
AGAP028876	SSU_rRNA_eukarya	Eukaryotic small subunit ribosomal RNA [Source:RFAM%3BAcc:RF01960]	2.03971e-10	0.983112	0.884	0.722	2.67835e-06	C_6
AGAP011284		Eukaryotic translation initiation factor 5A [Source:UniProtKB/TrEMBL%3BAcc:Q7PSR5]	1.57717e-13	1.0767	0.907	0.746	2.07099e-09	C_6
AGAP002465		ferritin heavy chain [Source:VB Community Annotation]	1.33212e-06	0.717941	0.907	0.751	0.017492	C_6
AGAP003599		F-type H+-transporting ATPase oligomycin sensitivity conferral protein [Source:VB Community Annotation]	7.42316e-07	1.16679	0.698	0.502	0.00974735	C_6
AGAP010173	Rack1	guanine nucleotide-binding protein subunit beta-like protein [Source:VB Community Annotation]	1.02232e-12	0.876693	0.93	0.727	1.34241e-08	C_6
AGAP002076		heat shock 70kDa protein 1/8 [Source:VB Community Annotation]	2.33118e-13	0.716248	1	0.837	3.06108e-09	C_6
AGAP006958	Hsp83	Heat shock protein 83 [Source:UniProtKB/Swiss-Prot%3BAcc:Q7PT10]	6.46124e-07	0.733467	0.86	0.703	0.00848425	C_6
AGAP012334		high mobility group protein D%2C isoform C [Source:VB Community Annotation]	7.23416e-09	1.1691	0.837	0.694	9.49917e-05	C_6
AGAP001813		Histone H3 [Source:UniProtKB/TrEMBL%3BAcc:Q7PUQ8]	2.27869e-08	0.970989	0.814	0.684	0.000299214	C_6
AGAP004349		K homology RNA-binding domain	7.24212e-12	1.09818	0.86	0.641	9.50963e-08	C_6
AGAP004993		laminin subunit alpha [Source:VB Community Annotation]	1.59282e-07	0.898139	0.93	0.856	0.00209153	C_6
AGAP004016		Leucine-rich repeats (LRRs)	2.14333e-07	0.917216	0.837	0.684	0.0028144	C_6
AGAP006961		molecular chaperone HtpG [Source:VB Community Annotation]	2.92718e-08	1.14983	0.767	0.565	0.000384368	C_6
AGAP010727		Mucin	2.98855e-07	0.887482	0.837	0.732	0.00392427	C_6
AGAP000927		myosin regulatory light chain%2C invertebrate [Source:VB Community Annotation]	6.84396e-10	1.00778	0.837	0.665	8.98681e-06	C_6
AGAP006766		nascent polypeptide-associated complex subunit alpha [Source:VB Community Annotation]	4.07293e-07	0.724507	0.837	0.684	0.00534817	C_6
AGAP004395		nucleophosmin 3 [Source:VB Community Annotation]	6.92228e-10	1.1811	0.814	0.612	9.08964e-06	C_6
AGAP007120		nucleoside-diphosphate kinase [Source:VB Community Annotation]	6.51432e-09	0.83867	0.884	0.732	8.55395e-05	C_6
AGAP007088		peptidyl-prolyl cis-trans isomerase B (cyclophilin B) [Source:VB Community Annotation]	3.84516e-08	0.913466	0.814	0.641	0.000504908	C_6
AGAP011092		Polyadenylate-binding protein [Source:UniProtKB/TrEMBL%3BAcc:Q7QH99]	1.78867e-09	1.02804	0.837	0.67	2.3487e-05	C_6
AGAP009861		Profilin protein [Source:VB Community Annotation]	5.55772e-07	0.628089	0.907	0.775	0.00729784	C_6
AGAP006459	SUI1	Protein translation factor SUI1 homolog [Source:UniProtKB/Swiss-Prot%3BAcc:P42678]	1.99335e-09	0.824592	0.884	0.727	2.61747e-05	C_6
AGAP002464		secreted ferritin G subunit [Source:VB Community Annotation]	3.255e-13	1.01532	0.953	0.732	4.27414e-09	C_6
AGAP000305		SPARC [Source:VB Community Annotation]	1.66124e-12	0.840223	0.977	0.842	2.18138e-08	C_6
AGAP009584	TRX1	Thioredoxin [Source:UniProtKB/TrEMBL%3BAcc:Q9NGZ1]	1.12671e-09	1.10859	0.814	0.617	1.47949e-05	C_6
AGAP011054	TPX2	thioredoxin peroxidase 2 [Source:VB Community Annotation]	2.00583e-11	0.91328	0.86	0.641	2.63385e-07	C_6
AGAP006614		transcription factor BTF3 homolog 4 [Source:VB Community Annotation]	2.55307e-14	1.29232	0.953	0.636	3.35243e-10	C_6
AGAP000376	Tsf1	transferrin 1	2.21303e-09	0.801918	0.977	0.809	2.90593e-05	C_6
AGAP003119		translation initiation factor 1A [Source:VB Community Annotation]	1.10718e-08	1.31733	0.767	0.55	0.000145383	C_6
AGAP002667	Tctp	Translationally-controlled tumor protein homolog [Source:UniProtKB/Swiss-Prot%3BAcc:Q7QCK2]	1.32107e-13	0.767285	0.953	0.751	1.7347e-09	C_6
AGAP007643		Tyrosine 3-monooxygenase/tryptophan 5-monooxygenase activation protein%2C beta polypeptide 2 [Source:VB Community Annotation]	5.33724e-09	0.890812	0.837	0.766	7.00833e-05	C_6
AGAP012708		Unknown	2.14693e-13	1.10453	0.907	0.646	2.81913e-09	C_6
AGAP028154		V-type proton ATPase proteolipid subunit [Source:UniProtKB/TrEMBL%3BAcc:A0A1S4HCY4]	1.75322e-12	0.814087	0.93	0.766	2.30215e-08	C_6
AGAP006169		(heparan sulfate)-glucosamine 3-sulfotransferase 5 [Source:VB Community Annotation]	2.45196e-07	2.38995	0.342	0.07	0.00321967	C_7
AGAP028810	5S_rRNA	5S ribosomal RNA [Source:RFAM%3BAcc:RF00001]	3.75937e-06	2.58987	0.237	0.037	0.0493643	C_7
AGAP011737		A disintegrin and metalloproteinase with thrombospondin motifs 16 [Source:VB Community Annotation]	5.68873e-08	2.37369	0.447	0.126	0.000746987	C_7
AGAP001356	ACE1	Acetylcholinesterase [Source:UniProtKB/Swiss-Prot%3BAcc:Q869C3]	1.08159e-10	2.3995	0.553	0.131	1.42024e-06	C_7
AGAP009315		adenylate cyclase 3 [Source:VB Community Annotation]	5.44938e-08	1.83359	0.447	0.112	0.000715558	C_7
AGAP006225		aldehyde oxidase [Source:VB Community Annotation]	1.48382e-06	1.86946	0.368	0.093	0.019484	C_7
AGAP002559		alpha-tocopherol transfer protein-like protein [Source:VB Community Annotation]	2.87031e-07	2.31923	0.289	0.047	0.003769	C_7
AGAP001631		amiloride-sensitive sodium channel%2C other [Source:VB Community Annotation]	3.94372e-09	3.33429	0.263	0.023	5.1785e-05	C_7
AGAP003692		Aminopeptidase [Source:UniProtKB/TrEMBL%3BAcc:Q5TT66]	9.62333e-07	2.17179	0.421	0.126	0.0126364	C_7
AGAP003695		aminopeptidase N [Source:VB Community Annotation]	3.64749e-07	2.21392	0.421	0.117	0.00478952	C_7
AGAP012757		aminopeptidase N1 [Source:VB Community Annotation]	1.47757e-06	2.54945	0.368	0.098	0.019402	C_7
AGAP003989		Ammonium transporter [Source:UniProtKB/TrEMBL%3BAcc:Q7Z1M1]	2.18236e-08	3.213	0.263	0.028	0.000286565	C_7
AGAP009995		anoctamin 10 [Source:VB Community Annotation]	2.89299e-14	2.50475	0.684	0.164	3.79879e-10	C_7
AGAP004660		Antennapedia homeotic protein [Source:VB Community Annotation]	1.41884e-08	2.75027	0.474	0.136	0.000186308	C_7
AGAP004661		Antp family%2C other [Source:VB Community Annotation]	5.99084e-09	3.17438	0.316	0.042	7.86657e-05	C_7
AGAP009799	ABCC13	ATP-binding cassette transporter (ABC transporter) family C member 13 [Source:VB Community Annotation]	1.3753e-11	1.51828	0.658	0.173	1.8059e-07	C_7
AGAP004881		bestrophin 2%2C3%2C4 [Source:VB Community Annotation]	2.96211e-06	2.36016	0.368	0.103	0.0388955	C_7
AGAP012115		Ca2+-transporting ATPase [Source:VB Community Annotation]	1.21636e-08	2.44348	0.421	0.093	0.000159721	C_7
AGAP004059		Ca-activated cl channel protein [Source:VB Community Annotation]	1.20528e-06	2.52715	0.211	0.023	0.0158266	C_7
AGAP009711		cadherin [Source:VB Community Annotation]	4.68416e-08	1.68742	0.421	0.098	0.000615077	C_7
AGAP009717		cadherin [Source:VB Community Annotation]	5.13628e-07	1.6714	0.5	0.168	0.00674445	C_7
AGAP008967		calcium/calmodulin-dependent 3'%2C5'-cyclic nucleotide phosphodiesterase [Source:VB Community Annotation]	1.06402e-07	2.33174	0.474	0.145	0.00139716	C_7
AGAP000715		carbonic anhydrase-related protein 10 [Source:VB Community Annotation]	5.44156e-07	2.07475	0.421	0.121	0.00714531	C_7
AGAP028695		carboxylesterase [Source:VB Community Annotation]	3.35645e-08	2.06426	0.421	0.098	0.000440735	C_7
AGAP001748		chitin synthase [Source:VB Community Annotation]	7.26139e-07	2.07587	0.421	0.121	0.00953493	C_7
AGAP001660		ciliary dynein heavy chain [Source:VB Community Annotation]	3.61258e-07	1.62968	0.632	0.29	0.00474368	C_7
AGAP009143	SCRAC1	Class A Scavenger Receptor (SRCR domain) with C-Type Lectin domain. [Source:VB Community Annotation]	1.19821e-08	1.83079	0.526	0.136	0.000157337	C_7
AGAP005725	SCRB3	Class B Scavenger Receptor (CD36 domain). [Source:VB Community Annotation]	7.87789e-08	1.9516	0.474	0.126	0.00103445	C_7
AGAP009217	CLIPB12	CLIP-domain serine protease [Source:VB Community Annotation]	9.88507e-10	3.4996	0.263	0.019	1.29801e-05	C_7
AGAP001308		coiled-coil domain-containing protein 64 [Source:VB Community Annotation]	1.2245e-06	2.35916	0.316	0.07	0.0160789	C_7
AGAP005037		Coiled-coil domain-containing protein AGAP005037 [Source:UniProtKB/Swiss-Prot%3BAcc:Q7PQ25]	5.59144e-08	2.19142	0.474	0.126	0.000734212	C_7
AGAP007761		Complement control protein [Source:VB Community Annotation]	1.64226e-06	1.79701	0.474	0.159	0.0215645	C_7
AGAP003509		Complexin%2C isoform V [Source:VB Community Annotation]	4.50102e-08	1.66395	0.632	0.262	0.000591029	C_7
AGAP029047	CTL5	C-type lectin [Source:VB Community Annotation]	5.92166e-09	2.00521	0.5	0.126	7.77574e-05	C_7
AGAP004950		CUG-BP- and ETR3-like factor [Source:VB Community Annotation]	2.31031e-08	2.30601	0.5	0.145	0.000303367	C_7
AGAP027993	CPLCP10	cuticular protein (putative) CPLCP10 [Source:VB Community Annotation]	2.16158e-06	2.46308	0.263	0.047	0.0283837	C_7
AGAP028208	CPLCP22	cuticular protein (putative) CPLCP22 [Source:VB Community Annotation]	1.14607e-07	2.69821	0.289	0.042	0.0015049	C_7
AGAP000345	CPR126	cuticular protein RR-2 family 126 [Source:VB Community Annotation]	1.24721e-07	2.4447	0.289	0.042	0.00163772	C_7
AGAP000537	TWDL8	cuticular protein TWDL family (TWDL8) [Source:VB Community Annotation]	3.50172e-06	2.96197	0.211	0.028	0.0459812	C_7
AGAP006423		cyanogenic beta-glucosidase [Source:VB Community Annotation]	7.54473e-07	2.33368	0.342	0.079	0.00990698	C_7
AGAP011314		cytochrome b5 reductase 4 [Source:VB Community Annotation]	1.04173e-06	2.47438	0.316	0.065	0.0136789	C_7
AGAP009183		defective proboscis extension response [Source:VB Community Annotation]	3.20663e-10	2.71718	0.447	0.084	4.21063e-06	C_7
AGAP009247		defective proboscis extension response [Source:VB Community Annotation]	7.36792e-09	2.39652	0.421	0.089	9.67481e-05	C_7
AGAP009248		defective proboscis extension response [Source:VB Community Annotation]	1.44814e-06	2.37232	0.368	0.098	0.0190156	C_7
AGAP009242		defective proboscis extension response [Source:VB Community Annotation]	3.62949e-09	2.24872	0.447	0.098	4.76588e-05	C_7
AGAP009253		defective proboscis extension response [Source:VB Community Annotation]	6.76777e-07	2.09143	0.474	0.164	0.00888676	C_7
AGAP010265		Delta%2C transcript variant A [Source:VB Community Annotation]	6.32956e-08	2.37062	0.395	0.089	0.000831134	C_7
AGAP000519		diacylglycerol kinase (ATP dependent) [Source:VB Community Annotation]	8.53151e-09	2.319	0.447	0.103	0.000112027	C_7
AGAP009579		dihydropyridine-sensitive l-type calcium channel [Source:VB Community Annotation]	4.39231e-08	2.95416	0.395	0.089	0.000576754	C_7
AGAP003124		dihydropyrimidinase [Source:VB Community Annotation]	1.18069e-10	3.1686	0.342	0.037	1.55037e-06	C_7
AGAP008742		Discoidin domain receptor family%2C member 1 [Source:VB Community Annotation]	4.88383e-08	2.31756	0.5	0.164	0.000641296	C_7
AGAP003070		disintegrin and metalloproteinase domain-containing protein 10 [Source:VB Community Annotation]	2.21364e-08	1.96786	0.474	0.121	0.000290673	C_7
AGAP007533		DNA polymerase theta [Source:VB Community Annotation]	1.01427e-07	2.72856	0.263	0.033	0.00133184	C_7
AGAP005755		DNA-binding protein D-ETS-3 [Source:VB Community Annotation]	4.93932e-07	2.02907	0.421	0.121	0.00648582	C_7
AGAP010784		dolichyl-phosphate-mannose-protein mannosyltransferase [Source:VB Community Annotation]	3.21231e-06	2.59171	0.289	0.061	0.0421809	C_7
AGAP008228		dual specificity phosphatase [Source:VB Community Annotation]	1.13465e-06	2.67031	0.263	0.042	0.0148991	C_7
AGAP010790		dynein heavy chain 2%2C cytosolic [Source:VB Community Annotation]	8.62124e-07	2.13553	0.421	0.121	0.0113205	C_7
AGAP010435		dynein heavy chain 9%2C axonemal [Source:VB Community Annotation]	7.49714e-07	2.0588	0.5	0.187	0.00984449	C_7
AGAP002009		dynein heavy chain%2C axonemal [Source:VB Community Annotation]	1.56889e-06	2.33092	0.421	0.131	0.020601	C_7
AGAP007675		dynein%2C axonemal heavy chain [Source:VB Community Annotation]	4.41756e-08	2.34913	0.447	0.117	0.00058007	C_7
AGAP007788		E3 ubiquitin-protein ligase RNF31 [Source:VB Community Annotation]	3.20483e-11	2.42972	0.632	0.182	4.20826e-07	C_7
AGAP007327	E74	E74-like factor 1/2/4 [Source:VB Community Annotation]	1.37302e-07	1.78769	0.526	0.168	0.00180291	C_7
AGAP010184		echinoid [Source:VB Community Annotation]	7.94439e-08	2.34564	0.316	0.051	0.00104318	C_7
AGAP007008		effector domain of the CAP family of transcription factors	1.11568e-06	2.99832	0.342	0.084	0.01465	C_7
AGAP011722		epithelial splicing regulatory protein [Source:VB Community Annotation]	8.23924e-07	2.71862	0.342	0.079	0.0108189	C_7
AGAP028865	LSU_rRNA_eukarya	Eukaryotic large subunit ribosomal RNA [Source:RFAM%3BAcc:RF02543]	1.84256e-09	1.46057	0.605	0.187	2.41947e-05	C_7
AGAP028973	LSU_rRNA_eukarya	Eukaryotic large subunit ribosomal RNA [Source:RFAM%3BAcc:RF02543]	2.28962e-14	1.44996	0.895	0.374	3.0065e-10	C_7
AGAP028953	LSU_rRNA_eukarya	Eukaryotic large subunit ribosomal RNA [Source:RFAM%3BAcc:RF02543]	1.68248e-06	1.28656	0.526	0.201	0.0220926	C_7
AGAP029036	LSU_rRNA_eukarya	Eukaryotic large subunit ribosomal RNA [Source:RFAM%3BAcc:RF02543]	3.5359e-11	0.915379	0.921	0.383	4.64299e-07	C_7
AGAP001633		Fibronectin type 3 domain; Immunoglobulin (Ig)-like domain	2.83968e-07	2.08346	0.526	0.178	0.00372879	C_7
AGAP007006		filamin [Source:VB Community Annotation]	2.37129e-06	2.00277	0.316	0.065	0.0311374	C_7
AGAP001577		forkhead box subgroup [Source:VB Community Annotation]	5.6014e-08	1.62529	0.605	0.215	0.00073552	C_7
AGAP004117		G protein-coupled receptor kinase [Source:VB Community Annotation]	5.15002e-07	2.20658	0.447	0.14	0.00676249	C_7
AGAP004453	GPRDOP3	GPCR Dopamine Family 3 [Source:VB Community Annotation]	4.51593e-08	1.65587	0.474	0.131	0.000592987	C_7
AGAP002573		GTPase-activating Rap/Ran-GAP domain-like protein 3 [Source:VB Community Annotation]	7.35739e-07	2.64931	0.368	0.093	0.00966099	C_7
AGAP009953		guanine nucleotide-binding protein G(I)/G(S)/G(O) subunit gamma-13 [Source:VB Community Annotation]	2.28949e-06	2.48162	0.342	0.089	0.0300633	C_7
AGAP006877	Gr32	gustatory receptor 32 [Source:VB Community Annotation]	4.99901e-08	2.57051	0.368	0.075	0.000656421	C_7
AGAP001115	Gr42	gustatory receptor 42 [Source:VB Community Annotation]	6.53987e-07	1.71555	0.368	0.089	0.00858751	C_7
AGAP007756	Gr46	gustatory receptor 46 [Source:VB Community Annotation]	5.63308e-07	2.14365	0.368	0.089	0.0073968	C_7
AGAP004716	Gr57	gustatory receptor 57 [Source:VB Community Annotation]	8.23924e-07	2.73819	0.342	0.079	0.0108189	C_7
AGAP007058		homeobox protein DLX%2C invertebrate [Source:VB Community Annotation]	1.67092e-06	2.31909	0.342	0.084	0.0219409	C_7
AGAP002178		homeobox protein homothorax [Source:VB Community Annotation]	4.68007e-10	2.03759	0.526	0.121	6.1454e-06	C_7
AGAP000488		homeobox protein Nkx-5 [Source:VB Community Annotation]	1.02764e-06	2.62702	0.211	0.023	0.0134939	C_7
AGAP004659		Homeotic antennapedia protein [Source:VB Community Annotation]	7.57657e-07	1.95193	0.395	0.107	0.0099488	C_7
AGAP010209		insulin gene enhancer protein ISL [Source:VB Community Annotation]	1.18264e-08	2.89254	0.421	0.098	0.000155293	C_7
AGAP005177		Intraflagellar transport 46 homolog [Source:VB Community Annotation]	8.9065e-08	3.10377	0.237	0.023	0.00116951	C_7
AGAP000798	GLURIIc	ionotropic receptor GLURIIc [Source:VB Community Annotation]	1.95221e-06	2.79081	0.263	0.047	0.0256345	C_7
AGAP002904	IR41a	ionotropic receptor IR41a [Source:VB Community Annotation]	2.43954e-06	2.42087	0.368	0.103	0.0320336	C_7
AGAP007502		kinesin family member 11 [Source:VB Community Annotation]	3.38918e-06	1.95076	0.342	0.084	0.0445033	C_7
AGAP009051	LL1	lipopolysaccharide-induced TNF-alpha transcription factor (LITAF-like 1) [Source:VB Community Annotation]	3.20737e-07	1.39065	0.421	0.103	0.0042116	C_7
AGAP008807		Lipoprotein N-terminal Domain.	4.43321e-07	1.26769	0.684	0.322	0.00582124	C_7
AGAP012372		low density lipoprotein receptor-related protein 2 precursor [Source:VB Community Annotation]	1.64395e-08	2.73265	0.421	0.093	0.000215868	C_7
AGAP010147		myosin heavy chain [Source:VB Community Annotation]	5.76483e-09	1.65175	0.658	0.243	7.5698e-05	C_7
AGAP005213		myosin XV [Source:VB Community Annotation]	3.67154e-10	2.35191	0.447	0.079	4.82109e-06	C_7
AGAP010742		nephrin [Source:VB Community Annotation]	1.36133e-08	2.11271	0.5	0.136	0.000178757	C_7
AGAP004066		neurexin [Source:VB Community Annotation]	1.80179e-10	2.25814	0.579	0.159	2.36594e-06	C_7
AGAP012343		neuromusculin [Source:VB Community Annotation]	4.54502e-07	2.1502	0.368	0.089	0.00596806	C_7
AGAP008588	alpha5	nicotinic acetylcholine receptor subunit alpha 5 [Source:VB Community Annotation]	1.33856e-07	1.9253	0.474	0.145	0.00175766	C_7
AGAP002152	alpha6	nicotinic acetylcholine receptor subunit alpha 6 [Source:VB Community Annotation]	2.63965e-11	2.5887	0.579	0.15	3.46613e-07	C_7
AGAP000962	alpha7	nicotinic acetylcholine receptor subunit alpha 7 [Source:VB Community Annotation]	3.75937e-06	2.63968	0.237	0.037	0.0493643	C_7
AGAP007415		Niemann-Pick Type C-2 [Source:VB Community Annotation]	3.75937e-06	2.68934	0.237	0.037	0.0493643	C_7
AGAP000068	NFI	nuclear factor I [Source:VB Community Annotation]	3.04477e-06	2.22975	0.316	0.075	0.0399809	C_7
AGAP009412	Or50	odorant receptor 50 [Source:VB Community Annotation]	3.37651e-11	2.47734	0.605	0.178	4.43369e-07	C_7
AGAP002188	OBP12	odorant-binding protein 12 [Source:VB Community Annotation]	6.23613e-08	2.82388	0.316	0.051	0.000818866	C_7
AGAP000461		Odz%2C odd Oz/ten-m homolog 2 (Drosophila) [Source:VB Community Annotation]	2.9539e-10	2.35083	0.526	0.121	3.87877e-06	C_7
AGAP003945		olypyrimidine tract-binding protein 2 [Source:VB Community Annotation]	1.40811e-09	2.08215	0.553	0.154	1.84899e-05	C_7
AGAP002628		opioid binding protein/cell adhesion molecule-like [Source:VB Community Annotation]	1.6747e-07	1.63403	0.5	0.15	0.00219905	C_7
AGAP001751		Oxidation resistance protein [Source:VB Community Annotation]	2.2802e-07	1.83724	0.605	0.252	0.00299413	C_7
AGAP010359		Pairberry [Source:VB Community Annotation]	1.10645e-08	2.50569	0.474	0.126	0.000145287	C_7
AGAP004877		paramyosin [Source:VB Community Annotation]	3.66565e-06	1.46762	0.395	0.112	0.0481337	C_7
AGAP006264		Peroxisomal targeting signal 2 receptor [Source:VB Community Annotation]	8.60426e-07	2.04959	0.421	0.117	0.0112983	C_7
AGAP011512		phospholipase b%2C plb1 [Source:VB Community Annotation]	1.04173e-06	2.14083	0.316	0.065	0.0136789	C_7
AGAP002644		phospholipid-translocating ATPase [Source:VB Community Annotation]	2.74844e-07	1.74865	0.447	0.126	0.00360897	C_7
AGAP005599		PH-sensitive chloride channel [Source:VB Community Annotation]	3.63367e-09	2.45815	0.553	0.159	4.77137e-05	C_7
AGAP007051		Piopio protein [Source:VB Community Annotation]	8.58769e-07	2.07249	0.395	0.103	0.0112765	C_7
AGAP010008		PI-PLC X domain-containing protein 3 [Source:VB Community Annotation]	1.18114e-06	2.42956	0.289	0.051	0.0155096	C_7
AGAP028708		Polypeptide N-acetylgalactosaminyltransferase [Source:UniProtKB/TrEMBL%3BAcc:A0A1S4HE74]	4.23571e-08	2.09909	0.447	0.117	0.000556191	C_7
AGAP003709		potassium large conductance calcium-activated channel subfamily M alpha member [Source:VB Community Annotation]	8.76306e-11	1.81983	0.684	0.22	1.15068e-06	C_7
AGAP002719		potassium voltage-gated channel Eag-related subfamily H%2C invertebrate [Source:VB Community Annotation]	2.96806e-08	1.62859	0.474	0.121	0.000389736	C_7
AGAP011113		potassium voltage-gated channel KQT-like subfamily member 1 [Source:VB Community Annotation]	2.75419e-07	2.39434	0.342	0.065	0.00361652	C_7
AGAP004783		predicted G-protein coupled receptor GPCR [Source:VB Community Annotation]	3.61235e-08	1.97683	0.474	0.131	0.000474338	C_7
AGAP009257		Protein ARRD-6%2C isoform a [Source:VB Community Annotation]	7.06806e-07	2.29243	0.395	0.112	0.00928107	C_7
AGAP007974	drm	Protein drumstick [Source:UniProtKB/Swiss-Prot%3BAcc:Q7PN68]	1.99408e-07	2.19293	0.368	0.084	0.00261843	C_7
AGAP001520		protein phosphatase 1%2C regulatory (inhibitor) subunit 3 [Source:VB Community Annotation]	1.4501e-07	2.03032	0.474	0.136	0.00190413	C_7
AGAP001773	GPRALS2	putative allatostatin receptor 2 [Source:VB Community Annotation]	7.36792e-09	2.20705	0.421	0.089	9.67481e-05	C_7
AGAP005465	GPRDIH2	putative diuretic insect hormone receptor 2 [Source:VB Community Annotation]	6.11583e-10	2.50295	0.5	0.121	8.0307e-06	C_7
AGAP010281	GPRGBB1	putative GABA-B receptor 1 [Source:VB Community Annotation]	3.34748e-09	2.42766	0.526	0.145	4.39557e-05	C_7
AGAP001807	GPRGPH	putative glycoprotein hormone gph-like receptor [Source:VB Community Annotation]	8.59241e-08	1.93593	0.447	0.117	0.00112827	C_7
AGAP011646		putative G-protein coupled receptor GPCR [Source:VB Community Annotation]	9.18475e-07	3.02725	0.237	0.033	0.0120605	C_7
AGAP007307		Rap guanine nucleotide exchange factor (GEF) 4 [Source:VB Community Annotation]	1.68818e-06	1.60614	0.447	0.15	0.0221675	C_7
AGAP008775		RasGEF domain family%2C member 1B [Source:VB Community Annotation]	7.66205e-10	2.47116	0.421	0.075	1.0061e-05	C_7
AGAP008989		RAS-like family 11 member A [Source:VB Community Annotation]	3.14844e-07	2.71869	0.263	0.037	0.00413421	C_7
AGAP001238		Ras-specific guanine nucleotide-releasing factor 2 [Source:VB Community Annotation]	3.19965e-06	1.82952	0.447	0.159	0.0420146	C_7
AGAP001690		regulating synaptic membrane exocytosis protein 2 [Source:VB Community Annotation]	8.20597e-14	1.73369	0.789	0.22	1.07753e-09	C_7
AGAP011622		Retina aberrant in pattern [Source:VB Community Annotation]	4.30758e-07	2.15023	0.263	0.037	0.00565628	C_7
AGAP006656		RNA-binding protein Musashi [Source:VB Community Annotation]	2.21529e-09	2.17915	0.474	0.112	2.90889e-05	C_7
AGAP004244		Rolling pebbles [Source:VB Community Annotation]	4.26561e-08	2.08998	0.5	0.145	0.000560117	C_7
AGAP009916		Salivary gland secreted protein domain toxin; RHS repeat-associated core domain	3.04193e-06	2.00971	0.447	0.154	0.0399436	C_7
AGAP005207		SCY1-like protein 2 [Source:VB Community Annotation]	4.31173e-07	2.17107	0.474	0.15	0.00566173	C_7
AGAP008656	sema1a	semaphorin 6 [Source:VB Community Annotation]	3.46708e-08	1.72665	0.605	0.238	0.000455263	C_7
AGAP006636		Semaphorin-2A [Source:VB Community Annotation]	1.61914e-08	2.3733	0.474	0.126	0.000212609	C_7
AGAP000768		septin 4 [Source:VB Community Annotation]	2.45373e-06	2.76596	0.263	0.047	0.03222	C_7
AGAP005702		serine collagenase 1 [Source:VB Community Annotation]	3.67757e-06	2.80433	0.184	0.019	0.0482902	C_7
AGAP000477		serine/threonine kinase 32 [Source:VB Community Annotation]	1.55595e-07	2.55126	0.368	0.084	0.00204311	C_7
AGAP010413		SH3 and multiple ankyrin repeat domains protein [Source:VB Community Annotation]	1.47586e-07	1.67432	0.526	0.168	0.00193795	C_7
AGAP001410		Sidestep protein [Source:VB Community Annotation]	6.63703e-10	2.03355	0.553	0.145	8.71508e-06	C_7
AGAP003128		signal transduction	1.99231e-07	2.60034	0.395	0.103	0.0026161	C_7
AGAP002793		slit homolog 1 protein precursor [Source:VB Community Annotation]	7.93576e-09	2.24648	0.526	0.15	0.000104204	C_7
AGAP007086		Sodium channel protein [Source:UniProtKB/TrEMBL%3BAcc:Q7QIV0]	3.0717e-10	1.66279	0.632	0.192	4.03345e-06	C_7
AGAP010383		solute carrier family 15 member 1 [Source:VB Community Annotation]	3.45568e-10	2.53625	0.395	0.061	4.53766e-06	C_7
AGAP004544		solute carrier family 35%2C member F3/4 [Source:VB Community Annotation]	4.45006e-08	2.15954	0.474	0.14	0.000584337	C_7
AGAP008100		Spire [Source:VB Community Annotation]	2.3963e-07	2.15564	0.474	0.15	0.00314658	C_7
AGAP002711		stardust%2C isoform B [Source:VB Community Annotation]	2.54827e-07	2.31539	0.421	0.112	0.00334613	C_7
AGAP003775		terribly reduced optic lobes	1.54471e-07	2.79347	0.316	0.056	0.00202836	C_7
AGAP003656		Terribly reduced optic lobes%2C isoform B [Source:VB Community Annotation]	1.52182e-15	2.06826	0.816	0.238	1.9983e-11	C_7
AGAP006590		T-lymphoma invasion and metastasis-inducing protein 1 [Source:VB Community Annotation]	5.65882e-09	2.09884	0.526	0.164	7.4306e-05	C_7
AGAP005564		transcription factor CP2 and related proteins [Source:VB Community Annotation]	1.05419e-06	2.18112	0.447	0.159	0.0138426	C_7
AGAP009559		transcription initiation factor TFIIB [Source:VB Community Annotation]	1.26298e-06	2.86817	0.237	0.033	0.0165842	C_7
AGAP011342		Transmembrane 4 superfamily member 3 [Source:VB Community Annotation]	1.0672e-08	3.15951	0.342	0.056	0.000140135	C_7
AGAP004870		tripeptidyl-peptidase II [Source:VB Community Annotation]	2.21364e-08	2.40671	0.474	0.121	0.000290673	C_7
AGAP006178		troponin C [Source:VB Community Annotation]	3.53095e-06	1.77057	0.342	0.084	0.0463649	C_7
AGAP006023		tyrosine 3-monooxygenase [Source:VB Community Annotation]	5.92007e-09	2.59627	0.447	0.103	7.77364e-05	C_7
AGAP008317		tyrosine-protein kinase Tec [Source:VB Community Annotation]	5.64663e-08	1.75791	0.553	0.178	0.000741459	C_7
AGAP010088		ubiquitin carboxyl-terminal hydrolase 9/24 [Source:VB Community Annotation]	2.64366e-06	1.52334	0.605	0.262	0.0347139	C_7
AGAP000535		Unknown	3.75396e-08	3.34905	0.211	0.014	0.000492932	C_7
AGAP004215		Unknown	4.48847e-12	3.24133	0.421	0.056	5.89381e-08	C_7
AGAP004947		Unknown	2.51957e-07	3.15283	0.237	0.028	0.00330844	C_7
AGAP006554		Unknown	2.74627e-08	3.08089	0.263	0.028	0.000360612	C_7
AGAP001638		Unknown	9.73512e-07	2.99805	0.237	0.033	0.0127832	C_7
AGAP008513		Unknown	5.82338e-09	2.94676	0.263	0.023	7.64667e-05	C_7
AGAP013176		Unknown	3.21231e-06	2.92751	0.289	0.061	0.0421809	C_7
AGAP006721		Unknown	2.38806e-08	2.92359	0.342	0.061	0.000313576	C_7
AGAP003399		Unknown	3.82584e-08	2.90096	0.395	0.089	0.000502371	C_7
AGAP006645		Unknown	3.81816e-12	2.89931	0.5	0.089	5.01363e-08	C_7
AGAP008973		Unknown	4.55292e-08	2.89536	0.211	0.014	0.000597844	C_7
AGAP028142		Unknown	2.72723e-07	2.89522	0.263	0.037	0.00358112	C_7
AGAP004873		Unknown	3.65675e-15	2.8842	0.605	0.107	4.80168e-11	C_7
AGAP000183		Unknown	7.69183e-10	2.88362	0.342	0.042	1.01001e-05	C_7
AGAP010470		Unknown	3.11416e-06	2.87561	0.237	0.037	0.040892	C_7
AGAP003479		Unknown	1.16532e-06	2.84303	0.263	0.042	0.0153018	C_7
AGAP012997		Unknown	1.09338e-07	2.79249	0.342	0.065	0.00143571	C_7
AGAP028179		Unknown	3.50172e-06	2.77964	0.211	0.028	0.0459812	C_7
AGAP011592		Unknown	3.50172e-06	2.7631	0.211	0.028	0.0459812	C_7
AGAP001013		Unknown	2.79444e-07	2.74005	0.289	0.047	0.00366938	C_7
AGAP013729		Unknown	2.7258e-09	2.73653	0.395	0.07	3.57925e-05	C_7
AGAP028534		Unknown	1.48104e-08	2.7338	0.368	0.065	0.000194476	C_7
AGAP002826		Unknown	1.2121e-09	2.72817	0.421	0.079	1.59161e-05	C_7
AGAP009283		Unknown	1.04615e-08	2.71567	0.447	0.103	0.00013737	C_7
AGAP013474		Unknown	2.02548e-11	2.70162	0.526	0.112	2.65966e-07	C_7
AGAP013139		Unknown	5.12545e-07	2.69321	0.289	0.051	0.00673022	C_7
AGAP007501		Unknown	6.64713e-09	2.69237	0.342	0.051	8.72835e-05	C_7
AGAP001706		Unknown	4.38096e-08	2.68991	0.211	0.014	0.000575264	C_7
AGAP004644		Unknown	1.94977e-07	2.68475	0.368	0.084	0.00256025	C_7
AGAP006514		Unknown	7.66205e-10	2.68376	0.421	0.075	1.0061e-05	C_7
AGAP011619		Unknown	9.4275e-09	2.6264	0.447	0.107	0.000123793	C_7
AGAP005277		Unknown	1.18947e-08	2.61029	0.289	0.033	0.000156189	C_7
AGAP004874		Unknown	7.69427e-14	2.59611	0.526	0.079	1.01033e-09	C_7
AGAP005165		Unknown	7.08686e-15	2.59257	0.658	0.145	9.30575e-11	C_7
AGAP003930		Unknown	2.79821e-09	2.59094	0.395	0.07	3.67432e-05	C_7
AGAP008072		Unknown	1.4496e-07	2.58094	0.395	0.098	0.00190347	C_7
AGAP000817		Unknown	1.04483e-07	2.58082	0.368	0.079	0.00137196	C_7
AGAP004052		Unknown	1.26241e-07	2.57309	0.395	0.093	0.00165766	C_7
AGAP005328		Unknown	9.4072e-07	2.57092	0.263	0.042	0.0123526	C_7
AGAP006493		Unknown	1.21257e-07	2.56467	0.289	0.042	0.00159223	C_7
AGAP009249		Unknown	7.00017e-07	2.55702	0.316	0.065	0.00919193	C_7
AGAP006282		Unknown	1.09119e-06	2.55531	0.316	0.065	0.0143284	C_7
AGAP008254		Unknown	1.40849e-07	2.55444	0.395	0.093	0.00184949	C_7
AGAP001111		Unknown	1.1529e-08	2.54595	0.447	0.107	0.000151387	C_7
AGAP028213		Unknown	3.67757e-06	2.53875	0.184	0.019	0.0482902	C_7
AGAP028578		Unknown	8.26848e-08	2.52902	0.368	0.075	0.00108573	C_7
AGAP003965		Unknown	4.07044e-12	2.51635	0.579	0.121	5.34489e-08	C_7
AGAP012504		Unknown	1.34413e-10	2.50087	0.5	0.107	1.76498e-06	C_7
AGAP008189		Unknown	2.13781e-06	2.49416	0.289	0.056	0.0280716	C_7
AGAP009411	Or20	Unknown	7.61895e-10	2.49249	0.474	0.103	1.00044e-05	C_7
AGAP000348		Unknown	5.70784e-08	2.49061	0.395	0.084	0.000749496	C_7
AGAP006188		Unknown	1.30857e-09	2.48106	0.5	0.126	1.71828e-05	C_7
AGAP009812		Unknown	3.64563e-08	2.47969	0.447	0.121	0.000478708	C_7
AGAP008512		Unknown	2.04199e-07	2.47926	0.421	0.117	0.00268134	C_7
AGAP005982		Unknown	8.81339e-10	2.44883	0.5	0.121	1.15729e-05	C_7
AGAP006732		Unknown	1.70031e-06	2.44074	0.368	0.098	0.0223267	C_7
AGAP010286		Unknown	1.88154e-10	2.43703	0.579	0.159	2.47064e-06	C_7
AGAP007923		Unknown	2.07951e-07	2.42514	0.421	0.112	0.0027306	C_7
AGAP012388		Unknown	7.54473e-07	2.4137	0.342	0.079	0.00990698	C_7
AGAP005713		Unknown	2.127e-08	2.41339	0.447	0.112	0.000279297	C_7
AGAP028751		Unknown	1.5884e-06	2.40682	0.237	0.033	0.0208573	C_7
AGAP010208		Unknown	2.43916e-07	2.40452	0.368	0.084	0.00320286	C_7
AGAP001925		Unknown	4.05132e-08	2.39283	0.447	0.112	0.000531979	C_7
AGAP007053		Unknown	1.65326e-06	2.36923	0.211	0.023	0.0217089	C_7
AGAP012768		Unknown	7.51477e-07	2.35198	0.289	0.051	0.00986764	C_7
AGAP028017		Unknown	8.23924e-07	2.33414	0.342	0.079	0.0108189	C_7
AGAP028644		Unknown	1.47201e-09	2.32616	0.421	0.075	1.93289e-05	C_7
AGAP009063		Unknown	2.37936e-06	2.31095	0.395	0.121	0.0312433	C_7
AGAP002104		Unknown	2.18315e-10	2.30279	0.579	0.154	2.86669e-06	C_7
AGAP005714		Unknown	3.12488e-06	2.30252	0.395	0.117	0.0410328	C_7
AGAP010534		Unknown	4.83825e-07	2.29989	0.395	0.098	0.0063531	C_7
AGAP010657		Unknown	1.35952e-06	2.28752	0.342	0.079	0.0178518	C_7
AGAP013179		Unknown	3.55315e-07	2.26304	0.289	0.047	0.00466564	C_7
AGAP006059		Unknown	3.52641e-09	2.25463	0.5	0.126	4.63054e-05	C_7
AGAP003871		Unknown	9.52831e-07	2.24996	0.342	0.075	0.0125116	C_7
AGAP007005		Unknown	2.82482e-07	2.24744	0.342	0.07	0.00370927	C_7
AGAP003233		Unknown	7.91407e-07	2.23559	0.368	0.089	0.010392	C_7
AGAP012963		Unknown	7.11683e-07	2.20581	0.421	0.126	0.0093451	C_7
AGAP013235		Unknown	1.43527e-07	2.19319	0.289	0.042	0.00188466	C_7
AGAP013147		Unknown	2.35146e-06	2.18682	0.289	0.056	0.030877	C_7
AGAP008140		Unknown	3.07688e-06	2.18651	0.368	0.098	0.0404025	C_7
AGAP013040		Unknown	9.91569e-07	2.18076	0.289	0.051	0.0130203	C_7
AGAP005257		Unknown	2.22724e-06	2.17522	0.447	0.15	0.0292459	C_7
AGAP005803		Unknown	9.39922e-11	2.17035	0.474	0.093	1.23421e-06	C_7
AGAP007585		Unknown	1.93343e-10	2.16682	0.658	0.215	2.53879e-06	C_7
AGAP000974		Unknown	1.17253e-08	2.15694	0.526	0.145	0.000153965	C_7
AGAP010024		Unknown	4.08978e-09	2.10297	0.579	0.168	5.37029e-05	C_7
AGAP004033		Unknown	6.7884e-07	2.10144	0.447	0.14	0.00891385	C_7
AGAP006586		Unknown	6.66517e-07	2.09179	0.342	0.075	0.00875204	C_7
AGAP028636		Unknown	3.42635e-06	2.08663	0.395	0.117	0.0449914	C_7
AGAP000906		Unknown	2.10565e-10	2.07311	0.553	0.136	2.76493e-06	C_7
AGAP011069		Unknown	4.42387e-08	2.04234	0.395	0.084	0.000580899	C_7
AGAP007563		Unknown	3.70406e-15	2.03511	0.868	0.29	4.8638e-11	C_7
AGAP004827		Unknown	3.4903e-09	2.02531	0.526	0.145	4.58312e-05	C_7
AGAP010023		Unknown	8.07699e-08	1.99531	0.526	0.173	0.00106059	C_7
AGAP003944		Unknown	2.71439e-06	1.99198	0.263	0.047	0.0356426	C_7
AGAP001824		Unknown	9.05239e-09	1.98786	0.526	0.154	0.000118867	C_7
AGAP028606		Unknown	2.09055e-08	1.98063	0.5	0.145	0.00027451	C_7
AGAP010295		Unknown	7.75792e-08	1.96409	0.421	0.098	0.00101869	C_7
AGAP028612		Unknown	3.79567e-07	1.96324	0.474	0.15	0.0049841	C_7
AGAP005010		Unknown	8.79362e-07	1.95731	0.368	0.089	0.0115469	C_7
AGAP004943		Unknown	2.73433e-09	1.95505	0.447	0.098	3.59045e-05	C_7
AGAP004367		Unknown	3.04424e-07	1.93056	0.526	0.178	0.0039974	C_7
AGAP005156		Unknown	6.9305e-08	1.92336	0.395	0.089	0.000910043	C_7
AGAP010158		Unknown	8.99388e-07	1.92139	0.474	0.15	0.0118099	C_7
AGAP007416		Unknown	3.68675e-06	1.90516	0.289	0.061	0.0484107	C_7
AGAP007072		Unknown	9.19535e-07	1.86784	0.421	0.131	0.0120744	C_7
AGAP000848		Unknown	2.01136e-06	1.83541	0.395	0.112	0.0264112	C_7
AGAP005285		Unknown	1.43115e-07	1.83524	0.447	0.117	0.00187924	C_7
AGAP004832		Unknown	2.99273e-07	1.79617	0.395	0.098	0.00392975	C_7
AGAP002135		Unknown	3.25215e-07	1.7926	0.342	0.07	0.0042704	C_7
AGAP007562		Unknown	1.4501e-07	1.78931	0.474	0.136	0.00190413	C_7
AGAP009917		Unknown	5.78017e-07	1.78192	0.5	0.159	0.00758994	C_7
AGAP004701		Unknown	3.9663e-07	1.77265	0.447	0.126	0.00520814	C_7
AGAP010884		Unknown	5.44069e-09	1.74282	0.658	0.252	7.14417e-05	C_7
AGAP005008		Unknown	5.17809e-08	1.72814	0.632	0.266	0.000679935	C_7
AGAP009424		Unknown	6.67292e-07	1.72542	0.526	0.192	0.00876221	C_7
AGAP006415		Unknown	8.08171e-07	1.70361	0.447	0.136	0.0106121	C_7
AGAP028509		Unknown	5.32033e-09	1.67855	0.553	0.168	6.98612e-05	C_7
AGAP004169		Unknown	1.27956e-09	1.66778	0.605	0.192	1.68018e-05	C_7
AGAP005096		Unknown	4.42758e-07	1.66175	0.368	0.084	0.00581385	C_7
AGAP005219		Unknown	5.11922e-09	1.64896	0.553	0.159	6.72205e-05	C_7
AGAP000630		Unknown	1.77584e-07	1.59651	0.368	0.079	0.00233186	C_7
AGAP004835		Unknown	8.48353e-07	1.5139	0.474	0.145	0.0111397	C_7
AGAP002578		Unknown	1.76122e-09	1.50868	0.632	0.206	2.31265e-05	C_7
AGAP013458		Unknown	5.24551e-07	1.44138	0.447	0.121	0.00688788	C_7
AGAP008810		Unknown	1.4425e-07	1.35787	0.684	0.304	0.00189415	C_7
AGAP013481		Unknown	7.91699e-07	1.33622	0.5	0.159	0.0103958	C_7
AGAP028498		Unknown	3.12094e-07	1.10593	0.553	0.182	0.00409811	C_7
AGAP000359		venom allergen [Source:VB Community Annotation]	2.63489e-10	2.80684	0.368	0.047	3.45987e-06	C_7
AGAP004203	Vg	vitellogenin [Source:VB Community Annotation]	7.19697e-12	1.24644	0.895	0.355	9.45034e-08	C_7
AGAP002505		voltage-dependent calcium channel alpha 1%2C invertebrate [Source:VB Community Annotation]	1.74988e-06	2.1617	0.421	0.131	0.0229777	C_7
AGAP009598		voltage-dependent calcium channel alpha-2/delta%2C invertebrate [Source:VB Community Annotation]	6.4765e-07	2.39369	0.395	0.103	0.00850429	C_7
AGAP008028		voltage-dependent calcium channel beta%2C invertebrate [Source:VB Community Annotation]	2.03835e-07	1.57857	0.526	0.168	0.00267656	C_7
AGAP004707	para	voltage-gated sodium channel [Source:VB Community Annotation]	8.02804e-10	1.79193	0.632	0.192	1.05416e-05	C_7
AGAP010283		wingless-type MMTV integration site family%2C member 7 [Source:VB Community Annotation]	1.29899e-07	2.61785	0.342	0.065	0.0017057	C_7
AGAP006260		Z band alternatively spliced PDZ-motif protein 66 [Source:VB Community Annotation]	4.26475e-07	1.64964	0.474	0.145	0.00560004	C_7
AGAP004436			9.09914e-08	3.38931	0.132	0	0.00119481	C_7
AGAP028784			1.25661e-06	3.31818	0.158	0.009	0.0165006	C_7
AGAP027986			7.66858e-08	3.30676	0.184	0.009	0.00100696	C_7
AGAP011696			1.85105e-06	3.10003	0.105	0	0.0243061	C_7
AGAP012448			2.16783e-06	3.07979	0.132	0.005	0.0284657	C_7
AGAP006851			8.33447e-08	3.07504	0.184	0.009	0.0010944	C_7
AGAP005463			2.16783e-06	3.0223	0.132	0.005	0.0284657	C_7
AGAP001010			7.35526e-08	3.02189	0.184	0.009	0.000965819	C_7
AGAP028097			1.28455e-07	2.96878	0.158	0.005	0.00168674	C_7
AGAP011513			3.01564e-06	2.81178	0.184	0.019	0.0395984	C_7
AGAP010128			9.09914e-08	2.72071	0.132	0	0.00119481	C_7
AGAP011830			3.4428e-06	2.69876	0.184	0.019	0.0452074	C_7
AGAP008880			1.85105e-06	2.60635	0.105	0	0.0243061	C_7
AGAP011782			4.91669e-08	2.52784	0.211	0.014	0.000645611	C_7
AGAP004132			1.85105e-06	2.47834	0.105	0	0.0243061	C_7
AGAP003275			3.1174e-06	2.45267	0.184	0.019	0.0409345	C_7
AGAP011066			1.85105e-06	2.35189	0.105	0	0.0243061	C_7
AGAP002937			2.71356e-06	2.29697	0.132	0.005	0.0356317	C_7
AGAP012031			2.48107e-06	2.28675	0.132	0.005	0.0325789	C_7
AGAP013356			2.71356e-06	2.11543	0.132	0.005	0.0356317	C_7
AGAP003082			1.85105e-06	2.09879	0.105	0	0.0243061	C_7
AGAP012457			9.31013e-07	1.94556	0.184	0.014	0.0122251	C_7
AGAP001568			6.94798e-07	1.67843	0.184	0.014	0.0091234	C_7
AGAP003212	Adrenodoxin	2Fe-2S ferredoxin-type domain	3.11029e-08	1.39258	0.542	0.101	0.000408412	C_8
AGAP008304		3'%2C5'-cyclic-nucleotide phosphodiesterase [Source:VB Community Annotation]	7.71283e-09	1.28329	0.833	0.219	0.000101277	C_8
AGAP006654		3-beta-hydroxy-delta-5-steroid dehydrogenase%2C steroid delta-isomerase [Source:VB Community Annotation]	6.15592e-07	2.18715	0.292	0.035	0.00808333	C_8
AGAP010535		3-demethylubiquinone-9 3-methyltransferase 2 [Source:VB Community Annotation]	9.45635e-11	2.10883	0.542	0.075	1.24171e-06	C_8
AGAP012409	GNBPA2	3-glucan binding protein [Source:VB Community Annotation]	9.08739e-14	1.92158	0.667	0.088	1.19327e-09	C_8
AGAP002799	GNBPB3	3-glucan binding protein [Source:VB Community Annotation]	3.54547e-08	1.9101	0.417	0.061	0.000465555	C_8
AGAP002449		3-OH androgenic UDPGT [Source:VB Community Annotation]	4.60647e-08	1.86948	0.417	0.061	0.000604876	C_8
AGAP009633		3-oxoacyl-(acyl-carrier protein) reductase fabG2 [Source:VB Community Annotation]	2.46529e-08	2.05189	0.417	0.061	0.000323717	C_8
AGAP005092		40S ribosomal protein S25 [Source:VB Community Annotation]	5.95146e-10	2.57294	0.292	0.018	7.81486e-06	C_8
AGAP010002		4-nitrophenylphosphatase [Source:VB Community Annotation]	1.57883e-15	3.52276	0.375	0.013	2.07316e-11	C_8
AGAP003856		4TM fire exit	9.32994e-08	1.95877	0.333	0.039	0.00122511	C_8
AGAP007686		50 kDa dystrophin-associated glycoprotein [Source:VB Community Annotation]	6.55358e-20	2.42672	0.875	0.11	8.60551e-16	C_8
AGAP011737		A disintegrin and metalloproteinase with thrombospondin motifs 16 [Source:VB Community Annotation]	6.10096e-13	1.97852	0.75	0.114	8.01117e-09	C_8
AGAP004201		a disintegrin and metalloproteinase with thrombospondin motifs 9 [Source:VB Community Annotation]	1.52419e-14	1.84855	0.875	0.149	2.00142e-10	C_8
AGAP003703		abnormal spindle-like microcephaly-associated protein [Source:VB Community Annotation]	5.94708e-12	2.48094	0.417	0.035	7.80911e-08	C_8
AGAP001356	ACE1	Acetylcholinesterase [Source:UniProtKB/Swiss-Prot%3BAcc:Q869C3]	2.21698e-06	1.36179	0.583	0.154	0.0291112	C_8
AGAP001676		actin%2C cytoplasmic [Source:VB Community Annotation]	1.48091e-13	2.41496	0.583	0.07	1.94459e-09	C_8
AGAP005425		actin-binding LIM protein [Source:VB Community Annotation]	1.36108e-10	1.39237	0.792	0.167	1.78723e-06	C_8
AGAP007460		acyl-CoA-binding protein 2 [Source:VB Community Annotation]	1.34487e-08	1.3145	0.542	0.101	0.000176595	C_8
AGAP008311		acylphosphatase [Source:VB Community Annotation]	8.50674e-11	2.34894	0.458	0.053	1.11702e-06	C_8
AGAP003359		adaptor protein complex AP-1 subunit gamma-1 [Source:VB Community Annotation]	3.87795e-11	2.06504	0.458	0.048	5.09213e-07	C_8
AGAP007631		adenylate cyclase [Source:VB Community Annotation]	3.71617e-07	1.02826	0.458	0.083	0.0048797	C_8
AGAP008683		adenylate cyclase 10 [Source:VB Community Annotation]	7.53002e-11	2.21776	0.333	0.022	9.88767e-07	C_8
AGAP009315		adenylate cyclase 3 [Source:VB Community Annotation]	1.29603e-09	1.4841	0.625	0.114	1.70181e-05	C_8
AGAP009317		adenylate kinase [Source:VB Community Annotation]	4.2123e-08	1.61222	0.5	0.092	0.000553117	C_8
AGAP002430	Akh2	adipokinetic hormone 2 [Source:VB Community Annotation]	1.78346e-09	1.94431	0.417	0.048	2.34187e-05	C_8
AGAP004039		afadin [Source:VB Community Annotation]	1.66819e-08	1.27389	0.833	0.237	0.00021905	C_8
AGAP007712		A-kinase anchor protein 13 [Source:VB Community Annotation]	2.20091e-11	1.76211	0.875	0.211	2.89002e-07	C_8
AGAP006220		aldehyde oxidase [Source:VB Community Annotation]	2.48544e-08	1.83544	0.458	0.075	0.000326364	C_8
AGAP006221		aldehyde oxidase [Source:VB Community Annotation]	2.31904e-09	1.35479	0.458	0.061	3.04513e-05	C_8
AGAP005638		aldehyde oxidase [Source:VB Community Annotation]	4.60647e-08	1.34386	0.417	0.061	0.000604876	C_8
AGAP005636		aldehyde oxidase [Source:VB Community Annotation]	9.16692e-08	1.32584	0.458	0.079	0.00120371	C_8
AGAP028096		Alkaline phosphatase [Source:UniProtKB/TrEMBL%3BAcc:A0A1S4HCW1]	7.0336e-11	2.45611	0.375	0.031	9.23582e-07	C_8
AGAP011305		Alkaline phosphatase [Source:UniProtKB/TrEMBL%3BAcc:A7US49]	3.74478e-09	1.26412	0.5	0.075	4.91727e-05	C_8
AGAP010596		Alkaline phosphatase [Source:UniProtKB/TrEMBL%3BAcc:Q7Q8R8]	5.9409e-08	2.2091	0.333	0.039	0.0007801	C_8
AGAP006400		alkaline phosphatase 2 [Source:VB Community Annotation]	7.08116e-07	1.59529	0.375	0.061	0.00929827	C_8
AGAP003712	Ast1	allatostatin 1 [Source:VB Community Annotation]	1.11338e-11	2.2963	0.5	0.057	1.46198e-07	C_8
AGAP010157	Ast2	allatostatin 2 [Source:VB Community Annotation]	2.08724e-08	2.0418	0.417	0.061	0.000274076	C_8
AGAP011357		All-trans/9-cis/11-cis [Source:VB Community Annotation]	8.59264e-14	1.91459	0.583	0.057	1.1283e-09	C_8
AGAP008125		all-trans-retinol dehydrogenase (NAD+) [Source:VB Community Annotation]	1.6583e-06	1.93493	0.25	0.026	0.0217752	C_8
AGAP010232		all-trans-retinol dehydrogenase (NAD+) [Source:VB Community Annotation]	8.41796e-16	1.60696	0.75	0.092	1.10536e-11	C_8
AGAP004397		alpha-1%2C6-mannosyl-glycoprotein beta-1%2C2-N-acetylglucosaminyltransferase [Source:VB Community Annotation]	1.5428e-12	1.62023	0.792	0.14	2.02585e-08	C_8
AGAP001497	ACTN	Alpha-actinin%2C sarcomeric [Source:UniProtKB/Swiss-Prot%3BAcc:Q7PKQ5]	1.31375e-06	1.14734	0.625	0.162	0.0172508	C_8
AGAP007160		alpha-crystallin chain B [Source:VB Community Annotation]	4.59362e-08	1.67314	0.458	0.075	0.000603188	C_8
AGAP008582		Alpha-mannosidase [Source:UniProtKB/TrEMBL%3BAcc:A0A1S4GYP5]	7.99245e-07	1.84091	0.375	0.061	0.0104949	C_8
AGAP004032		Alpha-mannosidase [Source:UniProtKB/TrEMBL%3BAcc:Q7QH78]	1.71455e-13	2.20052	0.5	0.044	2.25137e-09	C_8
AGAP004785		alpha-tocopherol transfer protein-like [Source:VB Community Annotation]	3.30119e-08	1.65143	0.5	0.088	0.000433479	C_8
AGAP002835		alpha-tocopherol transfer protein-like protein [Source:VB Community Annotation]	7.15228e-07	1.51381	0.458	0.092	0.00939166	C_8
AGAP005828		Alpha-tubulin N-acetyltransferase [Source:UniProtKB/Swiss-Prot%3BAcc:Q7PNM6]	1.92026e-09	1.45162	0.583	0.101	2.5215e-05	C_8
AGAP012279		amiloride-sensitive sodium channel [Source:VB Community Annotation]	1.66699e-08	1.93677	0.375	0.044	0.000218893	C_8
AGAP011610		amiloride-sensitive sodium channel%2C other [Source:VB Community Annotation]	1.16986e-14	2.72855	0.583	0.061	1.53615e-10	C_8
AGAP009590		amiloride-sensitive sodium channel%2C other [Source:VB Community Annotation]	2.6515e-07	1.84941	0.333	0.044	0.00348168	C_8
AGAP001124		Aminomethyltransferase [Source:UniProtKB/TrEMBL%3BAcc:Q7PWZ1]	1.39792e-14	2.14619	0.625	0.07	1.83561e-10	C_8
AGAP003692		Aminopeptidase [Source:UniProtKB/TrEMBL%3BAcc:Q5TT66]	2.23301e-12	1.67042	0.708	0.114	2.93216e-08	C_8
AGAP013001		aminopeptidase N [Source:VB Community Annotation]	3.24937e-08	1.96381	0.375	0.048	0.000426674	C_8
AGAP003695		aminopeptidase N [Source:VB Community Annotation]	1.37204e-09	1.44681	0.625	0.114	1.80162e-05	C_8
AGAP012757		aminopeptidase N1 [Source:VB Community Annotation]	2.90819e-14	2.01203	0.667	0.083	3.81875e-10	C_8
AGAP000328		AMME syndrome candidate gene 1 protein [Source:VB Community Annotation]	2.14415e-07	0.926075	0.708	0.175	0.00281548	C_8
AGAP002011		ammonium transporter Rh [Source:VB Community Annotation]	8.51728e-07	1.79295	0.333	0.048	0.011184	C_8
AGAP001446		AMP-activated protein kinase%2C gamma regulatory subunit [Source:VB Community Annotation]	2.4341e-07	1.09518	0.875	0.281	0.00319621	C_8
AGAP002790		amyloid beta A4 protein [Source:VB Community Annotation]	2.99337e-11	1.55292	0.75	0.145	3.93059e-07	C_8
AGAP004623		anaphase-promoting complex subunit 6 [Source:VB Community Annotation]	6.16527e-10	1.86654	0.583	0.101	8.09561e-06	C_8
AGAP002094		ancient conserved domain-containing protein 2 [Source:VB Community Annotation]	6.34446e-07	1.50298	0.583	0.14	0.00833091	C_8
AGAP007041		Angiopoietin-like salivary protein [Source:VB Community Annotation]	1.88758e-09	2.32393	0.375	0.039	2.47858e-05	C_8
AGAP007622	ANCE1	angiotensin-converting enzyme 1 [Source:VB Community Annotation]	1.38544e-06	1.92873	0.333	0.053	0.0181922	C_8
AGAP028646	ANCE3	angiotensin-converting enzyme 3 [Source:VB Community Annotation]	1.16746e-11	1.88169	0.458	0.044	1.533e-07	C_8
AGAP009756	ANCE6	angiotensin-converting enzyme 6 [Source:VB Community Annotation]	1.99539e-16	2.68073	0.5	0.031	2.62014e-12	C_8
AGAP009757	ANCE7	angiotensin-converting enzyme 7 [Source:VB Community Annotation]	4.8304e-14	1.58537	0.75	0.114	6.3428e-10	C_8
AGAP002272		ankyrin [Source:VB Community Annotation]	4.75255e-13	1.25177	0.625	0.075	6.24058e-09	C_8
AGAP009428		ankyrin repeat domain-containing protein 29 [Source:VB Community Annotation]	2.68682e-11	2.47788	0.458	0.048	3.52806e-07	C_8
AGAP009995		anoctamin 10 [Source:VB Community Annotation]	9.7395e-11	1.45557	0.833	0.18	1.27889e-06	C_8
AGAP010474		anoctamin 5 [Source:VB Community Annotation]	1.35193e-13	1.86409	0.708	0.101	1.77522e-09	C_8
AGAP009974	AAPP	anopheline antiplatelet protein [Source:VB Community Annotation]	4.28721e-14	2.08189	0.5	0.039	5.62954e-10	C_8
AGAP004660		Antennapedia homeotic protein [Source:VB Community Annotation]	2.05924e-12	1.79564	0.75	0.127	2.70399e-08	C_8
AGAP003354	A5R3	antigen 5 related protein 3 [Source:VB Community Annotation]	7.53002e-11	2.79974	0.333	0.022	9.88767e-07	C_8
AGAP013157		Antp family [Source:VB Community Annotation]	3.03686e-10	2.4323	0.417	0.044	3.9877e-06	C_8
AGAP008251		AP-1 complex subunit gamma-1 [Source:VB Community Annotation]	1.67736e-09	1.57341	0.625	0.123	2.20254e-05	C_8
AGAP027999	AQP8	aquaporin	1.71187e-16	2.79935	0.583	0.044	2.24785e-12	C_8
AGAP010326	AQP3	aquaporin [Source:VB Community Annotation]	2.28579e-15	2.3824	0.625	0.061	3.00147e-11	C_8
AGAP008767	AQP6	aquaporin [Source:VB Community Annotation]	2.22016e-09	2.29869	0.375	0.039	2.91529e-05	C_8
AGAP028491	AQP2	aquaporin [Source:VB Community Annotation]	2.1495e-18	2.24877	0.625	0.044	2.82251e-14	C_8
AGAP008842	AQP4	Aquaporin AQPAn.G [Source:UniProtKB/Swiss-Prot%3BAcc:Q7PWV1]	2.91424e-10	1.84096	0.542	0.079	3.82668e-06	C_8
AGAP008843	AQP1	Aquaporin water channel isoform A [Source:UniProtKB/TrEMBL%3BAcc:F2YNF6]	4.20516e-08	2.30803	0.375	0.053	0.000552179	C_8
AGAP007726		ArfGAP with SH3 domain%2C ankyrin repeat and PH domain 2 [Source:VB Community Annotation]	1.6257e-06	1.1223	0.75	0.254	0.021347	C_8
AGAP010134		arrestin-1 [Source:VB Community Annotation]	2.86245e-18	2.60395	0.625	0.048	3.75868e-14	C_8
AGAP006536		Arrowhead [Source:VB Community Annotation]	7.4653e-07	1.94051	0.333	0.048	0.00980269	C_8
AGAP028645		aryl hydrocarbon receptor nuclear translocator [Source:VB Community Annotation]	2.20407e-09	1.00441	0.75	0.167	2.89417e-05	C_8
AGAP011348		arylsulfatase b [Source:VB Community Annotation]	8.36225e-09	1.50351	0.458	0.066	0.000109805	C_8
AGAP003454		aspartyl/glutamyl-tRNA(Asn/Gln) amidotransferase%2C B subunit [Source:VB Community Annotation]	1.57944e-08	2.39236	0.333	0.035	0.000207396	C_8
[truncated: 2,624 more rows]

## Sheet: Depleted markers
Gene ID	Gene Name	Annotation	p_val	avg_log2FC	pct.1	pct.2	p_val_adj	cluster
AGAP028370	ATP6	adenosine triphosphatase subunit 6 [Source:European Nucleotide Archive%3BAcc:ATP6]	6.42305e-07	-1.88746	1	0.983	0.00843411	C_2
AGAP028387	CYTB	cytochrome b [Source:European Nucleotide Archive%3BAcc:CYTB]	2.83072e-07	-1.8575	1	0.987	0.00371702	C_2
AGAP028364	COX1	cytochrome c oxidase subunit I [Source:European Nucleotide Archive%3BAcc:COX1]	3.28639e-07	-1.79911	1	0.996	0.00431535	C_2
AGAP028366	COX2	cytochrome c oxidase subunit II [Source:European Nucleotide Archive%3BAcc:COX2]	3.28545e-07	-1.86176	1	0.97	0.00431413	C_2
AGAP028371	COX3	cytochrome c oxidase subunit III [Source:European Nucleotide Archive%3BAcc:COX3]	2.64841e-07	-1.83199	1	0.987	0.00347762	C_2
AGAP028918	LSU_rRNA_eukarya	Eukaryotic large subunit ribosomal RNA [Source:RFAM%3BAcc:RF02543]	1.7711e-06	-1.17726	1	0.978	0.0232563	C_2
AGAP028941	LSU_rRNA_eukarya	Eukaryotic large subunit ribosomal RNA [Source:RFAM%3BAcc:RF02543]	3.86087e-08	-1.45417	1	0.991	0.00050697	C_2
AGAP028391	lsu rRNA	lsu rRNA	2.39603e-07	-1.91276	1	0.987	0.00314623	C_2
AGAP028373	ND3	NADH dehydrogenase subunit 3 [Source:European Nucleotide Archive%3BAcc:ND3]	7.27871e-07	-2.06268	1	0.926	0.00955767	C_2
AGAP028382	ND4	NADH dehydrogenase subunit 4 [Source:European Nucleotide Archive%3BAcc:ND4]	2.76494e-06	-1.78036	1	0.944	0.0363064	C_2
AGAP028380	ND5	NADH dehydrogenase subunit 5 [Source:European Nucleotide Archive%3BAcc:ND5]	3.68669e-07	-1.9542	1	0.961	0.00484099	C_2
AGAP004203	Vg	vitellogenin [Source:VB Community Annotation]	2.98119e-06	-4.71509	0	0.491	0.039146	C_3
AGAP001690		regulating synaptic membrane exocytosis protein 2 [Source:VB Community Annotation]	8.58854e-07	-4.10913	0	0.376	0.0112776	C_4
AGAP004203	Vg	vitellogenin [Source:VB Community Annotation]	2.80866e-07	-3.49606	0.128	0.507	0.00368806	C_4
AGAP005618		1%2C2-dihydroxy-3-keto-5-methylthiopentene dioxygenase [Source:UniProtKB/TrEMBL%3BAcc:Q7Q6X6]	9.16919e-07	-0.972545	0.053	0.542	0.0120401	C_5
AGAP004986	Seleno	15 kDa selenoprotein [Source:VB Community Annotation]	2.53082e-06	-4.56302	0	0.407	0.0332322	C_5
AGAP001697		20S proteasome subunit beta 3 [Source:VB Community Annotation]	9.94732e-07	-4.8022	0	0.43	0.0130618	C_5
AGAP009271	Prosbeta1	26S proteasome beta 1 subunit [Source:VB Community Annotation]	1.10895e-06	-0.633821	0.053	0.537	0.0145616	C_5
AGAP002061		26S proteasome regulatory subunit N7 [Source:VB Community Annotation]	2.53082e-06	-4.59351	0	0.407	0.0332322	C_5
AGAP001256		3'-phosphoadenosine 5'-phosphosulfate synthase [Source:VB Community Annotation]	4.00816e-09	-2.53434	0.026	0.607	5.26311e-05	C_5
AGAP000964		3TM protein	2.39852e-09	-1.67302	0.053	0.673	3.1495e-05	C_5
AGAP008001	RpS27a	40S ribosomal protein S27a [Source:VB Community Annotation]	1.30432e-06	-1.28506	0.053	0.533	0.017127	C_5
AGAP000415		5-hydroxyisourate hydrolase [Source:VB Community Annotation]	1.52586e-07	-0.765476	0.079	0.64	0.0020036	C_5
AGAP004210		7TM GPCR, serpentine receptor class h (Srh)	3.03822e-06	-4.4197	0	0.402	0.0398949	C_5
AGAP011827		acetyl-CoA acyltransferase [Source:VB Community Annotation]	1.74907e-06	-4.47215	0	0.416	0.022967	C_5
AGAP004626		actin binding	5.89461e-07	-2.71715	0.053	0.537	0.00774021	C_5
AGAP001306		actin related protein 2/3 complex%2C subunit 4 [Source:VB Community Annotation]	1.53454e-06	-2.95639	0.026	0.472	0.02015	C_5
AGAP008908		actin-related protein 2/3 complex subunit 1A [Source:VB Community Annotation]	1.64231e-06	-2.85182	0.026	0.472	0.0215651	C_5
AGAP009154	ARC-P34	actin-related protein 2/3 complex subunit 2 [Source:VB Community Annotation]	3.98412e-07	-2.48239	0.053	0.551	0.00523155	C_5
AGAP005662		acyl-CoA dehydrogenase [Source:VB Community Annotation]	9.94732e-07	-4.65118	0	0.43	0.0130618	C_5
AGAP003405		adenylosuccinate synthase [Source:VB Community Annotation]	2.53082e-06	-4.36901	0	0.407	0.0332322	C_5
AGAP002931	Arf2	ADP-ribosylation factor 2 [Source:VB Community Annotation]	3.73404e-08	-1.79306	0.026	0.561	0.000490317	C_5
AGAP006890	Arf3	ADP-ribosylation factor 3 [Source:VB Community Annotation]	1.67024e-09	-3.31952	0.026	0.621	2.19319e-05	C_5
AGAP003578		aldehyde dehydrogenase (NAD+) [Source:VB Community Annotation]	8.92736e-07	-1.23301	0.053	0.542	0.0117225	C_5
AGAP011050		aldehyde reductase [Source:VB Community Annotation]	3.78458e-06	-0.96656	0.053	0.505	0.0496953	C_5
AGAP003408		aldose reductase [Source:VB Community Annotation]	2.13073e-09	-5.19017	0	0.565	2.79787e-05	C_5
AGAP012053		alpha%2Calpha-trehalase [Source:VB Community Annotation]	7.99071e-09	-2.20709	0.079	0.668	0.000104926	C_5
AGAP008632		alpha-aminoadipic semialdehyde synthase [Source:VB Community Annotation]	8.3195e-07	-1.78835	0.079	0.584	0.0109243	C_5
AGAP009621		alpha-N-acetylgalactosaminidase [Source:VB Community Annotation]	9.15657e-08	-4.94173	0	0.486	0.00120235	C_5
AGAP000806		Angiopoietin-like 1 [Source:VB Community Annotation]	1.12613e-07	-4.97389	0	0.481	0.00147872	C_5
AGAP003721	ANXB10B	annexin B10B [Source:VB Community Annotation]	9.14883e-08	-3.35877	0.026	0.537	0.00120133	C_5
AGAP001043	arm	Armadillo segment polarity protein [Source:UniProtKB/Swiss-Prot%3BAcc:Q7QHW5]	1.54207e-06	-1.30006	0.079	0.579	0.020249	C_5
AGAP002182	ABCE1	ATP-binding cassette transporter (ABC transporter) family E member 1 [Source:VB Community Annotation]	2.73754e-06	-1.33119	0.053	0.514	0.0359466	C_5
AGAP009850		ATP-binding cassette transporter (ABC transporter) family G member 7 [Source:VB Community Annotation]	2.13628e-07	-3.12869	0.026	0.519	0.00280515	C_5
AGAP009135		ATP-dependent RNA helicase DDX6/DHH1 [Source:VB Community Annotation]	3.47441e-06	-0.64569	0.158	0.682	0.0456225	C_5
AGAP005528		Bax inhibitor 1-related	3.94118e-08	-5.06379	0	0.505	0.000517517	C_5
AGAP010557		B-cell receptor-associated protein 31 [Source:VB Community Annotation]	2.10536e-06	-4.73595	0	0.411	0.0276454	C_5
AGAP009156		BRICHOS domain	1.10307e-12	-3.56115	0.026	0.752	1.44844e-08	C_5
AGAP004298		calcineurin beta subunit [Source:VB Community Annotation]	1.74907e-06	-4.77846	0	0.416	0.022967	C_5
AGAP006186	Ca-P60A	Calcium-transporting ATPase sarcoplasmic/endoplasmic reticulum type [Source:UniProtKB/Swiss-Prot%3BAcc:Q7PPA5]	6.07529e-07	-1.31347	0.053	0.551	0.00797747	C_5
AGAP007103		calsyntenin-1 [Source:VB Community Annotation]	2.80057e-06	-1.61685	0.105	0.589	0.0367743	C_5
AGAP002414		carboxypeptidase D [Source:VB Community Annotation]	2.80783e-06	-2.90644	0.026	0.453	0.0368697	C_5
AGAP006907		Cat eye syndrome chromosome region%2C candidate 1a [Source:VB Community Annotation]	3.03822e-06	-4.71391	0	0.402	0.0398949	C_5
AGAP003277		cathepsin D [Source:VB Community Annotation]	3.1496e-07	-2.22218	0.053	0.565	0.00413573	C_5
AGAP002879		cathepsin F [Source:VB Community Annotation]	3.45185e-10	-1.39892	0.053	0.71	4.53263e-06	C_5
AGAP011828	Cp1	cathepsin L [Source:VB Community Annotation]	3.72868e-06	-0.740235	0.184	0.743	0.0489613	C_5
AGAP009651		CD63 antigen [Source:VB Community Annotation]	1.01936e-11	-5.57425	0	0.664	1.33852e-07	C_5
AGAP004484		CDGSH iron sulfur domain-containing protein 2 homolog [Source:VB Community Annotation]	2.00538e-06	-2.32402	0.026	0.467	0.0263327	C_5
AGAP005625	SCRASP1	Class A Scavenger Receptor (SRCR domain) with Serine Protease domain. [Source:VB Community Annotation]	8.41626e-08	-1.61289	0.079	0.626	0.00110514	C_5
AGAP003021		Clathrin heavy chain [Source:UniProtKB/TrEMBL%3BAcc:Q7PQY9]	3.24772e-08	-0.92824	0.105	0.724	0.000426458	C_5
AGAP000290	CLIPA27	CLIPA	3.61934e-07	-2.41424	0.026	0.509	0.00475256	C_5
AGAP001648	CLIPB17	CLIP-domain serine protease [Source:VB Community Annotation]	1.74907e-06	-4.90361	0	0.416	0.022967	C_5
AGAP000375		Coiled-coil-helix-coiled-coil-helix domain-containing protein 3, mitochondrial	6.78113e-07	-4.54364	0	0.439	0.0089043	C_5
AGAP010347	CuSOD3	copper-zinc superoxide dismutase 3 [Source:VB Community Annotation]	3.45185e-10	-1.40739	0.053	0.71	4.53263e-06	C_5
AGAP006522		Copz1 protein [Source:VB Community Annotation]	8.21879e-07	-4.81121	0	0.435	0.0107921	C_5
AGAP003304		CREG/Cellular Repressor of E1A- and JH-stimulated Genes	1.07286e-07	-2.10146	0.026	0.537	0.00140878	C_5
AGAP003893		C-terminal-binding protein [Source:VB Community Annotation]	9.75064e-08	-1.14726	0.132	0.743	0.00128036	C_5
AGAP002878		Cystatin-like protein [Source:VB Community Annotation]	1.61517e-06	-1.63322	0.053	0.528	0.0212088	C_5
AGAP000851		cytochrome c oxidase subunit 6a%2C mitochrondrial [Source:VB Community Annotation]	3.82129e-07	-0.856145	0.079	0.617	0.00501774	C_5
AGAP002862	CYP6AA1	cytochrome P450 [Source:VB Community Annotation]	1.38002e-06	-2.33672	0.026	0.477	0.018121	C_5
AGAP011157		cytosolic prostaglandin-E synthase [Source:VB Community Annotation]	2.27915e-06	-1.27179	0.053	0.519	0.0299275	C_5
AGAP028120	D7L3	D7 long form salivary protein [Source:VB Community Annotation]	4.40944e-07	-2.22907	0.026	0.505	0.00579004	C_5
AGAP007609		DAZ associated protein 2	8.72227e-09	-2.10192	0.053	0.645	0.000114532	C_5
AGAP009288		Derlin-1 [Source:VB Community Annotation]	3.77651e-07	-4.92909	0	0.453	0.00495893	C_5
AGAP000832		Derlin-2/3 [Source:VB Community Annotation]	7.93816e-07	-2.48202	0.053	0.537	0.0104236	C_5
AGAP011629		dihydrolipoamide dehydrogenase [Source:VB Community Annotation]	5.03984e-07	-1.54556	0.079	0.579	0.00661781	C_5
AGAP002534		dihydropteridine reductase [Source:VB Community Annotation]	2.93721e-06	-1.03738	0.026	0.458	0.0385685	C_5
AGAP007620		DnaJ homolog subfamily C member 5 [Source:VB Community Annotation]	3.77651e-07	-4.61664	0	0.453	0.00495893	C_5
AGAP002396		dolichyl-diphosphooligosaccharide--protein glycosyltransferase [Source:VB Community Annotation]	3.77651e-07	-4.49631	0	0.453	0.00495893	C_5
AGAP000434		dolichyl-diphosphooligosaccharide--protein glycosyltransferase [Source:VB Community Annotation]	4.59672e-07	-4.557	0	0.449	0.00603596	C_5
AGAP000425		DUF1754	3.04288e-06	-3.07706	0.026	0.453	0.0399561	C_5
AGAP006068		DUF229	9.37224e-08	-1.48773	0.105	0.701	0.00123067	C_5
AGAP004948		duplex-specific nuclease [Source:VB Community Annotation]	1.45111e-06	-4.85811	0	0.421	0.0190545	C_5
AGAP011833		enoyl-CoA hydratase [Source:VB Community Annotation]	1.74907e-06	-4.44903	0	0.416	0.022967	C_5
AGAP012755		ER lumen protein retaining receptor [Source:VB Community Annotation]	6.47074e-07	-1.92559	0.079	0.584	0.00849672	C_5
AGAP010225		ER lumen protein retaining receptor [Source:VB Community Annotation]	9.62793e-08	-2.13781	0.079	0.621	0.00126424	C_5
AGAP010224		ER lumen protein retaining receptor [Source:VB Community Annotation]	1.3262e-09	-5.27652	0	0.575	1.74143e-05	C_5
AGAP006607	eIF3i	Eukaryotic translation initiation factor 3 subunit I [Source:UniProtKB/Swiss-Prot%3BAcc:Q7PP77]	2.99957e-06	-1.84164	0.053	0.505	0.0393873	C_5
AGAP011580	eIF3k	Eukaryotic translation initiation factor 3 subunit K [Source:UniProtKB/Swiss-Prot%3BAcc:Q7QGK4]	9.16919e-07	-0.734201	0.053	0.542	0.0120401	C_5
AGAP012281	eIF3m	Eukaryotic translation initiation factor 3 subunit M [Source:UniProtKB/Swiss-Prot%3BAcc:Q7Q068]	2.53797e-07	-4.80625	0	0.463	0.00333261	C_5
AGAP009443		excitatory amino acid transporter 3 [Source:VB Community Annotation]	1.29939e-08	-1.82403	0.105	0.715	0.000170623	C_5
AGAP005813		FeS cluster assembly scaffold IscU [Source:VB Community Annotation]	1.80434e-08	-2.98731	0.026	0.575	0.000236927	C_5
AGAP006615		FK506-binding protein 8 [Source:VB Community Annotation]	2.03261e-06	-1.79401	0.026	0.467	0.0266902	C_5
AGAP003789		flotillin [Source:VB Community Annotation]	2.10536e-06	-4.0453	0	0.411	0.0276454	C_5
AGAP004916		FREP11	2.56548e-06	-1.95835	0.053	0.514	0.0336873	C_5
AGAP005134		F-type H+-transporting ATPase subunit alpha [Source:VB Community Annotation]	2.56306e-07	-1.62759	0.132	0.696	0.00336556	C_5
AGAP001138		F-type H+-transporting ATPase subunit b [Source:VB Community Annotation]	2.09628e-06	-0.845934	0.132	0.668	0.0275262	C_5
AGAP007920		glucuronosyltransferase [Source:VB Community Annotation]	2.10536e-06	-4.07009	0	0.411	0.0276454	C_5
AGAP006360		glutamate synthase (NADPH/NADH) [Source:VB Community Annotation]	7.53845e-07	-1.76694	0.053	0.533	0.00989874	C_5
AGAP000804	GPXH2	glutathione peroxidase 2 [Source:VB Community Annotation]	6.76626e-08	-1.63633	0.053	0.603	0.000888478	C_5
AGAP007583		golgi-associated plant pathogenesis-related protein 1 [Source:VB Community Annotation]	4.41435e-07	-1.94334	0.053	0.542	0.00579648	C_5
AGAP004098		GTP-binding protein SAR1 [Source:VB Community Annotation]	8.18113e-08	-2.59674	0.079	0.607	0.00107426	C_5
AGAP010589		guanine nucleotide-binding protein subunit gamma [Source:VB Community Annotation]	3.47416e-07	-1.67798	0.079	0.589	0.00456192	C_5
AGAP004739		H/ACA ribonucleoprotein complex subunit 4 [Source:VB Community Annotation]	6.51331e-07	-1.95907	0.105	0.607	0.00855263	C_5
AGAP009882		heat shock factor-binding protein 1 [Source:VB Community Annotation]	3.64255e-06	-4.4616	0	0.397	0.0478303	C_5
AGAP011082		heat shock transcription factor%2C invertebrate [Source:VB Community Annotation]	1.19308e-06	-1.78245	0.053	0.523	0.0156664	C_5
AGAP007237	HPX4	heme peroxidase 4 [Source:VB Community Annotation]	1.57283e-06	-1.44447	0.211	0.692	0.0206529	C_5
AGAP000005		high mobility group protein B1 [Source:VB Community Annotation]	2.59698e-07	-1.63331	0.079	0.621	0.00341009	C_5
AGAP006353		Histidine triad nucleotide binding protein 1 [Source:VB Community Annotation]	1.20227e-06	-4.43219	0	0.425	0.015787	C_5
AGAP012199		Histone H2B [Source:UniProtKB/Swiss-Prot%3BAcc:Q27442]	3.20994e-06	-2.6897	0.026	0.453	0.0421497	C_5
AGAP004696	exd	Homeobox protein extradenticle [Source:UniProtKB/Swiss-Prot%3BAcc:Q7PMT1]	2.19169e-06	-1.19196	0.053	0.519	0.0287791	C_5
AGAP002032		hypothetical protein, possible vitellogenin	5.44264e-09	-3.60703	0.053	0.593	7.14673e-05	C_5
AGAP005404		lectin%2C mannose-binding 1 [Source:VB Community Annotation]	1.74907e-06	-4.5918	0	0.416	0.022967	C_5
AGAP007045	LRIM15	leucine-rich immune protein (TM) [Source:VB Community Annotation]	2.56672e-06	-0.894341	0.053	0.509	0.0337037	C_5
AGAP028015		LRR	2.08963e-07	-2.5306	0.053	0.561	0.0027439	C_5
AGAP003878		LRR TM	6.5492e-09	-2.53107	0.053	0.65	8.59976e-05	C_5
AGAP004431		Lysosomal transcription factor, NCU-G1	5.29003e-07	-2.52032	0.026	0.5	0.00694634	C_5
AGAP009510		Malate dehydrogenase (Fragment) [Source:UniProtKB/TrEMBL%3BAcc:Q7PSB4]	1.39893e-06	-2.25357	0.026	0.477	0.0183693	C_5
AGAP006216	GPRMTH2	methuselah receptor 2 [Source:VB Community Annotation]	8.83848e-07	-2.49773	0.053	0.537	0.0116058	C_5
AGAP000092		methylsterol monooxygenase [Source:VB Community Annotation]	1.6893e-08	-3.68916	0.026	0.57	0.000221822	C_5
AGAP010552		mimitin%2C mitochondrial [Source:VB Community Annotation]	2.60037e-06	-1.953	0.053	0.509	0.0341455	C_5
AGAP005674		Miple [Source:VB Community Annotation]	2.01874e-09	-3.43693	0.026	0.617	2.65081e-05	C_5
AGAP006340		misshapen/NIK-related kinase [Source:VB Community Annotation]	1.3261e-08	-4.4187	0	0.528	0.00017413	C_5
AGAP006936		mitochondrial cytochrome c1 heme protein [Source:VB Community Annotation]	2.97538e-06	-0.655212	0.105	0.593	0.0390698	C_5
AGAP004000		myosin IX [Source:VB Community Annotation]	2.04082e-08	-3.21774	0.026	0.565	0.000267981	C_5
AGAP012533		NADH dehydrogenase (ubiquinone) 1 alpha subcomplex 6 [Source:VB Community Annotation]	1.82116e-07	-2.9921	0.026	0.523	0.00239136	C_5
AGAP000849		NADH dehydrogenase (ubiquinone) 1 beta subcomplex 1 [Source:VB Community Annotation]	1.27023e-06	-1.67047	0.053	0.533	0.0166794	C_5
AGAP007780		NADH dehydrogenase (ubiquinone) 1 beta subcomplex 10 [Source:VB Community Annotation]	4.22402e-07	-0.861425	0.053	0.561	0.00554656	C_5
AGAP012374		NADH dehydrogenase (ubiquinone) 1 beta subcomplex 3 [Source:VB Community Annotation]	1.84586e-06	-1.51009	0.053	0.523	0.024238	C_5
AGAP009602		NADH dehydrogenase (ubiquinone) 1 beta subcomplex 6 [Source:VB Community Annotation]	2.42775e-07	-1.78412	0.026	0.519	0.00318787	C_5
AGAP002889		NADH dehydrogenase (ubiquinone) 1 subcomplex unknown 2 [Source:VB Community Annotation]	1.10895e-06	-0.728116	0.053	0.537	0.0145616	C_5
AGAP009824		NADH dehydrogenase (ubiquinone) Fe-S protein 5 [Source:VB Community Annotation]	4.61686e-09	-1.99981	0.053	0.654	6.06239e-05	C_5
AGAP009493	alpha9	nicotinic acetylcholine receptor subunit alpha 9 [Source:VB Community Annotation]	1.02746e-07	-1.38297	0.053	0.593	0.00134916	C_5
AGAP004395		nucleophosmin 3 [Source:VB Community Annotation]	1.42713e-08	-1.04663	0.105	0.743	0.000187397	C_5
AGAP000321		Nucleoside phosphorylase	2.28954e-07	-2.18397	0.079	0.607	0.00300639	C_5
AGAP006383		oligosaccharyltransferase complex subunit beta [Source:VB Community Annotation]	3.08665e-06	-3.32827	0.026	0.444	0.0405309	C_5
AGAP001582		painless/TRPA Channel	2.24709e-06	-0.931026	0.105	0.617	0.0295066	C_5
AGAP005558		peptidase (mitochondrial processing) beta [Source:VB Community Annotation]	1.73652e-07	-1.45802	0.053	0.575	0.00228022	C_5
AGAP006243		phosphatidylinositol-4%2C5-bisphosphate 4-phosphatase [Source:VB Community Annotation]	4.98287e-07	-3.59787	0.026	0.486	0.006543	C_5
AGAP007202		poly(A) RNA binding	2.53797e-07	-4.76227	0	0.463	0.00333261	C_5
AGAP011165		prefoldin [Source:VB Community Annotation]	9.57468e-07	-1.59805	0.026	0.486	0.0125725	C_5
AGAP003662		Prenylated Rab acceptor protein 1 [Source:VB Community Annotation]	2.10536e-06	-4.75643	0	0.411	0.0276454	C_5
AGAP005432		programmed cell death protein 5 [Source:VB Community Annotation]	1.39893e-06	-2.01679	0.026	0.477	0.0183693	C_5
AGAP000971		prolyl 4-hydroxylase [Source:VB Community Annotation]	1.91814e-06	-3.1414	0.026	0.463	0.0251871	C_5
AGAP000308		proteasome activator subunit 3 (PA28 gamma) [Source:VB Community Annotation]	2.26584e-07	-3.31841	0.026	0.514	0.00297527	C_5
AGAP004609		protein kinase C substrate 80K-H [Source:VB Community Annotation]	2.53082e-06	-4.52565	0	0.407	0.0332322	C_5
AGAP011166		protein phosphatase 1%2C catalytic subunit [Source:VB Community Annotation]	3.73404e-08	-1.17918	0.026	0.561	0.000490317	C_5
AGAP011504		protein transport protein SEC61 subunit beta [Source:VB Community Annotation]	1.97101e-08	-1.99437	0.053	0.626	0.000258813	C_5
AGAP005929		pyridoxine kinase [Source:VB Community Annotation]	1.38002e-06	-2.21622	0.026	0.477	0.018121	C_5
AGAP004559		Ras-related protein [Source:VB Community Annotation]	2.79363e-08	-2.94715	0.026	0.565	0.000366831	C_5
AGAP001617		Ras-related protein Rab-7A [Source:VB Community Annotation]	2.42117e-08	-1.14469	0.026	0.57	0.000317924	C_5
AGAP001874		Ras-related protein Rap-1A [Source:VB Community Annotation]	8.1412e-08	-1.15301	0.132	0.72	0.00106902	C_5
AGAP001545		ribosomal biogenesis protein RLP24 [Source:VB Community Annotation]	3.45836e-06	-1.80046	0.053	0.505	0.0454117	C_5
AGAP005202		RING-box protein 1 [Source:VB Community Annotation]	6.44095e-07	-1.1198	0.053	0.547	0.00845761	C_5
AGAP010499	AD20590	S-(hydroxymethyl)glutathione dehydrogenase [Source:UniProtKB/TrEMBL%3BAcc:A0A1S4H465]	2.10536e-06	-4.61733	0	0.411	0.0276454	C_5
AGAP011532		septin [Source:VB Community Annotation]	2.53082e-06	-4.32452	0	0.407	0.0332322	C_5
AGAP007596		septin 7 [Source:VB Community Annotation]	5.11475e-07	-2.06511	0.053	0.547	0.00671617	C_5
AGAP002569		serine incorporator 1 [Source:VB Community Annotation]	3.77651e-07	-4.69583	0	0.453	0.00495893	C_5
AGAP001375	SRPN12	serine protease inhibitor (serpin) 12 [Source:VB Community Annotation]	3.03822e-06	-3.51804	0	0.402	0.0398949	C_5
AGAP009670	SRPN4	serine protease inhibitor (serpin) 4 [Source:VB Community Annotation]	2.5154e-08	-0.647083	0.105	0.706	0.000330298	C_5
AGAP004096		Serine/threonine-protein phosphatase 2A 56 kDa regulatory subunit epsilon [Source:VB Community Annotation]	1.4496e-06	-0.846504	0.079	0.556	0.0190346	C_5
AGAP002238		Serpent/GATA	2.36981e-06	-2.97546	0.026	0.458	0.031118	C_5
AGAP007362		SH3 domain-binding glutamic acid-rich-like protein 3 [Source:VB Community Annotation]	2.52785e-06	-2.08291	0.079	0.551	0.0331932	C_5
AGAP003069		signal peptidase%2C endoplasmic reticulum-type [Source:VB Community Annotation]	2.54477e-07	-1.78033	0.053	0.57	0.00334154	C_5
AGAP002706		small nuclear ribonucleoprotein G [Source:VB Community Annotation]	2.44506e-06	-1.74523	0.026	0.463	0.032106	C_5
AGAP007791		sodium/potassium-transporting ATPase subunit beta [Source:VB Community Annotation]	1.74907e-06	-4.06315	0	0.416	0.022967	C_5
AGAP003300		solute carrier family 39 (zinc transporter) [Source:VB Community Annotation]	1.74907e-06	-4.59623	0	0.416	0.022967	C_5
AGAP006246		Sorcin [Source:VB Community Annotation]	2.80345e-07	-2.7141	0.026	0.514	0.00368122	C_5
AGAP008719		S-phase kinase-associated protein 1 [Source:VB Community Annotation]	9.16919e-07	-0.876302	0.053	0.542	0.0120401	C_5
AGAP011940		sphingomyelin phosphodiesterase [Source:VB Community Annotation]	4.09577e-11	-1.978	0.053	0.734	5.37815e-07	C_5
AGAP003794		splicing factor%2C proline- and glutamine-rich [Source:VB Community Annotation]	2.62972e-06	-1.36003	0.079	0.547	0.0345308	C_5
AGAP012307		Spondin-1 [Source:VB Community Annotation]	7.47444e-11	-4.58592	0.026	0.645	9.81468e-07	C_5
AGAP005672		staphylococcal nuclease domain-containing protein 1 [Source:VB Community Annotation]	2.17098e-07	-3.23053	0.026	0.514	0.00285071	C_5
AGAP001069		SURF-4	4.54578e-11	-2.09337	0.053	0.738	5.96907e-07	C_5
AGAP009569		syntenin-1 isoform 1 [Source:VB Community Annotation]	6.76508e-09	-5.32346	0	0.542	8.88323e-05	C_5
AGAP003477		T-complex protein 1 subunit zeta [Source:VB Community Annotation]	3.35084e-07	-2.36036	0.053	0.542	0.00439998	C_5
AGAP028038		Tetratricopeptide repeat domain	2.10536e-06	-4.6746	0	0.411	0.0276454	C_5
AGAP008368	TEP14	thioester-containing protein 14 [Source:VB Community Annotation]	2.85711e-06	-1.4097	0.079	0.561	0.0375167	C_5
AGAP010816	TEP3	thioester-containing protein 3 [Source:VB Community Annotation]	3.12629e-09	-2.79034	0.079	0.664	4.10513e-05	C_5
AGAP009584	TRX1	Thioredoxin [Source:UniProtKB/TrEMBL%3BAcc:Q9NGZ1]	2.42409e-07	-0.622244	0.132	0.743	0.00318308	C_5
AGAP000044		thioredoxin domain-containing protein [Source:VB Community Annotation]	2.62082e-07	-1.86209	0.079	0.598	0.0034414	C_5
AGAP007259		TMEM9 protein [Source:VB Community Annotation]	1.39893e-06	-2.51809	0.026	0.477	0.0183693	C_5
AGAP009311		Tocopherol (alpha) transfer protein-like [Source:VB Community Annotation]	3.47713e-06	-2.0105	0.026	0.453	0.0456582	C_5
AGAP009515	REL1	TOLL pathway signalling NF-kappaB Relish-like transcription factor [Source:VB Community Annotation]	7.79612e-07	-2.0481	0.026	0.491	0.0102371	C_5
AGAP011535		transcription elongation factor B%2C polypeptide 1 [Source:VB Community Annotation]	3.03822e-06	-4.61973	0	0.402	0.0398949	C_5
AGAP003119		translation initiation factor 1A [Source:VB Community Annotation]	2.14876e-06	-1.05331	0.132	0.668	0.0282154	C_5
AGAP000526		translation initiation factor 4B [Source:VB Community Annotation]	2.41254e-07	-1.72468	0.105	0.654	0.00316791	C_5
AGAP007172		translation initiation factor 4E [Source:VB Community Annotation]	2.40383e-06	-2.06209	0.053	0.514	0.0315647	C_5
AGAP012339		Translocase of outer mitochondrial membrane 20 homolog [Source:VB Community Annotation]	2.87437e-06	-0.967394	0.105	0.607	0.0377433	C_5
AGAP010386		Translocating chain-associated membrane protein 2 [Source:VB Community Annotation]	1.20227e-06	-4.90083	0	0.425	0.015787	C_5
AGAP005861		Translocon-associated protein subunit beta [Source:UniProtKB/TrEMBL%3BAcc:Q5TRB4]	3.52368e-06	-0.869387	0.026	0.453	0.0462695	C_5
AGAP005529		Transmembrane BAX inhibitor motif-containing protein 4 [Source:VB Community Annotation]	1.39893e-06	-1.00415	0.026	0.477	0.0183693	C_5
AGAP000949		transmembrane emp24 domain-containing protein 3 precursor [Source:VB Community Annotation]	3.64255e-06	-4.3997	0	0.397	0.0478303	C_5
AGAP003553		Transmembrane emp24 protein transport domain containing 9 [Source:VB Community Annotation]	1.68247e-09	-5.35505	0	0.57	2.20925e-05	C_5
AGAP011076		ubiquitin-conjugating enzyme E2 I [Source:VB Community Annotation]	2.12514e-06	-1.13547	0.079	0.565	0.0279052	C_5
AGAP005197		ubiquitin-conjugating enzyme E2 N [Source:VB Community Annotation]	1.38002e-06	-2.488	0.026	0.477	0.018121	C_5
AGAP006937		ubiquitin-conjugating enzyme E2 variant [Source:VB Community Annotation]	1.3309e-06	-1.1518	0.079	0.584	0.017476	C_5
AGAP011984		UDP-N-acetyl-alpha-D-galactosamine:polypeptide N-acetylgalactosaminyltransferase 20 [Source:VB Community Annotation]	7.43384e-08	-4.92548	0	0.491	0.000976138	C_5
AGAP003914		Unknown	3.40596e-07	-1.2015	0.211	0.79	0.00447236	C_5
AGAP000669		Unknown	1.72378e-07	-1.44211	0.053	0.579	0.0022635	C_5
AGAP005611		Unknown	5.66469e-10	-1.4852	0.053	0.701	7.43831e-06	C_5
AGAP000268		Unknown	3.68766e-06	-1.53625	0.079	0.556	0.0484227	C_5
AGAP028439		Unknown	3.5433e-07	-1.60011	0.132	0.692	0.00465271	C_5
AGAP003864		Unknown	2.42775e-07	-1.82265	0.026	0.519	0.00318787	C_5
AGAP012524		Unknown	5.4761e-08	-2.70732	0.026	0.551	0.000719067	C_5
AGAP000385		Unknown	5.01524e-10	-3.15582	0.053	0.664	6.58551e-06	C_5
AGAP005820		Unknown	5.4761e-08	-3.22918	0.026	0.551	0.000719067	C_5
AGAP000685		Unknown	6.78113e-07	-4.12029	0	0.439	0.0089043	C_5
AGAP012813		Unknown	2.10536e-06	-4.22316	0	0.411	0.0276454	C_5
AGAP009672		Unknown	5.58707e-07	-4.49938	0	0.444	0.00733638	C_5
AGAP004604		Unknown	1.20227e-06	-4.70061	0	0.425	0.015787	C_5
AGAP012674		Unknown	3.39973e-09	-5.12592	0	0.556	4.46418e-05	C_5
AGAP005380		UPF0220	1.65418e-08	-4.80939	0	0.523	0.000217211	C_5
AGAP003430	VhaM8.9	vacuolar H+ ATPase M8.9 accessory subunit [Source:VB Community Annotation]	1.68068e-06	-0.932487	0.079	0.57	0.022069	C_5
AGAP002186		very low-density lipoprotein receptor [Source:VB Community Annotation]	2.42299e-06	-0.79746	0.263	0.822	0.0318163	C_5
AGAP004867		V-type H+-transporting ATPase subunit G [Source:VB Community Annotation]	3.39973e-09	-5.39645	0	0.556	4.46418e-05	C_5
AGAP003588	VATH	V-type H+-transporting ATPase subunit H [Source:VB Community Annotation]	9.15657e-08	-4.94624	0	0.486	0.00120235	C_5
AGAP003711		V-type H+-transporting ATPase subunit I [Source:VB Community Annotation]	1.53958e-07	-1.48709	0.132	0.706	0.00202162	C_5
AGAP005602		zinc finger protein 706 [Source:VB Community Annotation]	2.03261e-06	-1.67346	0.026	0.467	0.0266902	C_5
AGAP003439		Zinc finger, FLYWCH-type	1.95763e-08	-1.49107	0.079	0.664	0.000257056	C_5
AGAP004256		Zinc finger, LIM-type	5.34133e-07	-1.06908	0.132	0.696	0.0070137	C_5
AGAP000971		prolyl 4-hydroxylase [Source:VB Community Annotation]	3.45891e-06	-2.35978	0.07	0.464	0.0454189	C_6
AGAP010090		receptor-type tyrosine-protein phosphatase F [Source:VB Community Annotation]	2.60911e-06	-3.81187	0.023	0.397	0.0342602	C_6
AGAP001394		synaptosomal-associated protein%2C 23kDa [Source:VB Community Annotation]	8.9299e-08	-4.55894	0	0.45	0.00117259	C_6
AGAP001151		14-3-3 protein epsilon [Source:VB Community Annotation]	3.18645e-07	-1.77877	0.316	0.766	0.00418412	C_7
AGAP003935	Prosalpha1	26S proteasome alpha 1 subunit [Source:VB Community Annotation]	1.56185e-07	-3.68375	0.053	0.523	0.00205087	C_7
AGAP000739	RpS10	40S ribosomal protein S10 [Source:VB Community Annotation]	2.36228e-06	-1.37767	0.526	0.822	0.0310191	C_7
AGAP009998	RpS11	40S ribosomal protein S11 [Source:UniProtKB/Swiss-Prot%3BAcc:P52812]	3.00708e-06	-1.2519	0.5	0.818	0.039486	C_7
AGAP005947	RpS13	40S ribosomal protein S13 [Source:UniProtKB/Swiss-Prot%3BAcc:P52811]	5.89482e-09	-2.02659	0.342	0.808	7.74048e-05	C_7
AGAP000655	RpS14-1	40S ribosomal protein S14a [Source:UniProtKB/Swiss-Prot%3BAcc:Q7QEH1]	4.67367e-08	-1.73813	0.342	0.776	0.000613699	C_7
AGAP002346	RpS14-2	40S ribosomal protein S14b [Source:UniProtKB/Swiss-Prot%3BAcc:Q7QBX2]	6.26989e-10	-2.55141	0.184	0.766	8.233e-06	C_7
AGAP001274	RpS15	40S ribosomal protein S15 [Source:VB Community Annotation]	5.21123e-07	-1.52867	0.526	0.822	0.00684287	C_7
AGAP000541	RpS15a-1	40S ribosomal protein S15a [Source:VB Community Annotation]	1.16392e-06	-1.55201	0.421	0.804	0.0152834	C_7
AGAP009572	RpS15a-2	40S ribosomal protein S15a [Source:VB Community Annotation]	6.07761e-09	-2.64933	0.132	0.692	7.9805e-05	C_7
AGAP011424	RpS16	40S ribosomal protein S16 [Source:VB Community Annotation]	9.05934e-08	-1.56802	0.447	0.841	0.00118958	C_7
AGAP004887	RpS17	40S ribosomal protein S17 [Source:UniProtKB/Swiss-Prot%3BAcc:Q9U9L1]	2.11908e-06	-1.20162	0.579	0.874	0.0278256	C_7
AGAP028693	RpS18	40S ribosomal protein S18 [Source:VB Community Annotation]	2.0622e-06	-1.38016	0.5	0.841	0.0270787	C_7
AGAP010933	RpS19	40S ribosomal protein S19 [Source:VB Community Annotation]	3.25602e-06	-1.38012	0.5	0.808	0.0427548	C_7
AGAP003768	RpS2	40S ribosomal protein S2 [Source:VB Community Annotation]	3.69249e-08	-1.55581	0.579	0.883	0.000484861	C_7
AGAP010591	RpS20	40S ribosomal protein S20 [Source:VB Community Annotation]	6.89288e-07	-1.57775	0.447	0.827	0.00905104	C_7
AGAP009431	RpS21	40S ribosomal protein S21 [Source:UniProtKB/TrEMBL%3BAcc:Q7PTN4]	2.7478e-08	-1.58688	0.474	0.808	0.000360813	C_7
AGAP012990	RpS23	40S ribosomal protein S23 [Source:VB Community Annotation]	3.95571e-11	-2.10083	0.368	0.879	5.19424e-07	C_7
AGAP005131	RpS24	40S ribosomal protein S24 [Source:UniProtKB/TrEMBL%3BAcc:Q7PQ02]	2.67293e-07	-1.54558	0.553	0.832	0.00350983	C_7
AGAP007157	RpS27	40S ribosomal protein S27 [Source:UniProtKB/TrEMBL%3BAcc:Q7PT96]	2.92326e-07	-1.66998	0.368	0.794	0.00383853	C_7
AGAP013742		40S ribosomal protein S27a [Source:VB Community Annotation]	3.37208e-07	-1.54132	0.5	0.846	0.00442787	C_7
AGAP003412	RpS28	40S ribosomal protein S28 [Source:VB Community Annotation]	5.75225e-08	-2.08305	0.211	0.729	0.000755328	C_7
AGAP001595	RpS29	40S ribosomal protein S29 [Source:VB Community Annotation]	3.11132e-08	-1.98823	0.263	0.752	0.000408548	C_7
AGAP001910	RpS3	40S ribosomal protein S3 [Source:VB Community Annotation]	3.70035e-07	-1.54543	0.421	0.808	0.00485893	C_7
AGAP000654	RpS30	40S ribosomal protein S30 [Source:UniProtKB/TrEMBL%3BAcc:Q7QEH2]	2.98708e-06	-1.11122	0.579	0.86	0.0392234	C_7
AGAP003532	RpS3a	40S ribosomal protein S3a [Source:UniProtKB/Swiss-Prot%3BAcc:P52813]	2.44954e-09	-1.55262	0.658	0.897	3.2165e-05	C_7
AGAP006871	RpS4	40S ribosomal protein S4 [Source:UniProtKB/TrEMBL%3BAcc:Q7PT95]	1.05411e-07	-1.49961	0.526	0.846	0.00138415	C_7
AGAP008329	RpS5	40S ribosomal protein S5 [Source:VB Community Annotation]	4.74221e-09	-1.84542	0.395	0.822	6.227e-05	C_7
AGAP002919	RpS6	40S ribosomal protein S6 [Source:VB Community Annotation]	5.22894e-08	-1.68978	0.421	0.841	0.000686612	C_7
AGAP010592	S7	40S ribosomal protein S7 [Source:UniProtKB/Swiss-Prot%3BAcc:P33514]	4.0342e-08	-1.74994	0.368	0.79	0.000529731	C_7
AGAP002437	RpS8	40S ribosomal protein S8 [Source:UniProtKB/TrEMBL%3BAcc:Q7QC42]	2.66572e-08	-1.61938	0.553	0.869	0.000350035	C_7
AGAP005061	RpS9	40S ribosomal protein S9 [Source:VB Community Annotation]	1.58149e-10	-2.22888	0.289	0.818	2.07665e-06	C_7
AGAP011777	RpSA	40S ribosomal protein SA [Source:UniProtKB/Swiss-Prot%3BAcc:Q7PZ81]	7.75366e-07	-1.40229	0.5	0.836	0.0101813	C_7
AGAP000415		5-hydroxyisourate hydrolase [Source:VB Community Annotation]	7.14589e-07	-2.13924	0.158	0.626	0.00938327	C_7
AGAP000953	RpL10-1	60S ribosomal protein L10-1 [Source:VB Community Annotation]	4.88533e-07	-1.52452	0.421	0.785	0.00641493	C_7
AGAP002395	RpL10-2	60S ribosomal protein L10-2 [Source:VB Community Annotation]	2.21383e-09	-1.882	0.368	0.841	2.90698e-05	C_7
AGAP011173	RpL11	60S ribosomal protein L11 [Source:VB Community Annotation]	1.66442e-09	-1.94683	0.421	0.85	2.18555e-05	C_7
AGAP001805	RpL13	60S ribosomal protein L13 [Source:UniProtKB/TrEMBL%3BAcc:Q7PUQ7]	1.96479e-06	-1.28475	0.5	0.836	0.0257997	C_7
AGAP010257	RpL13a	60S ribosomal protein L13a [Source:VB Community Annotation]	7.06277e-07	-1.27295	0.579	0.888	0.00927413	C_7
AGAP005991	RpL14	60S ribosomal protein L14 [Source:VB Community Annotation]	4.2007e-08	-1.63128	0.421	0.841	0.000551594	C_7
AGAP004919	RpL15	60S ribosomal protein L15 [Source:UniProtKB/Swiss-Prot%3BAcc:P52818]	2.27388e-07	-1.59455	0.421	0.799	0.00298583	C_7
AGAP007580	RpL18	60S ribosomal protein L18 [Source:UniProtKB/Swiss-Prot%3BAcc:Q7QJM5]	6.06182e-10	-2.13294	0.368	0.813	7.95978e-06	C_7
AGAP012284	RpL18a-1	60S ribosomal protein L18a [Source:UniProtKB/TrEMBL%3BAcc:Q7PV82]	1.16091e-07	-1.68854	0.421	0.822	0.00152439	C_7
AGAP004422	RpL19	60S ribosomal protein L19 [Source:VB Community Annotation]	1.22172e-08	-1.58654	0.5	0.832	0.000160423	C_7
AGAP012138	RpL21	60S ribosomal protein L21 [Source:VB Community Annotation]	1.658e-08	-1.64364	0.474	0.808	0.000217712	C_7
AGAP005046	RpL22	60S ribosomal protein L22 [Source:VB Community Annotation]	7.24236e-07	-1.45972	0.447	0.804	0.00950995	C_7
AGAP010252	RpL23	60S ribosomal protein L23 [Source:VB Community Annotation]	4.80069e-09	-1.83078	0.368	0.832	6.30378e-05	C_7
AGAP006037	RpL24	60S ribosomal protein L24 [Source:VB Community Annotation]	1.12664e-07	-1.57446	0.526	0.846	0.0014794	C_7
AGAP010216	RpL25	60S ribosomal protein L25 [Source:VB Community Annotation]	2.92833e-09	-2.14164	0.289	0.762	3.84519e-05	C_7
AGAP002468	RpL26	60S ribosomal protein L26 [Source:VB Community Annotation]	7.49075e-10	-1.95474	0.421	0.86	9.8361e-06	C_7
AGAP011706	RpL27a	60S ribosomal protein L27a [Source:VB Community Annotation]	3.95748e-08	-1.62861	0.447	0.841	0.000519657	C_7
AGAP005427	RpL28	60S ribosomal protein L28 [Source:VB Community Annotation]	5.45809e-12	-2.31843	0.316	0.86	7.16702e-08	C_7
AGAP006612	RpL29	60S ribosomal protein L29 [Source:VB Community Annotation]	1.10867e-08	-1.99364	0.263	0.785	0.000145579	C_7
AGAP003556	RpL3	60S ribosomal protein L3 [Source:VB Community Annotation]	4.39752e-07	-1.39181	0.447	0.841	0.00577439	C_7
AGAP003816	RpL30	60S ribosomal protein L30 [Source:VB Community Annotation]	2.1852e-07	-1.5326	0.447	0.808	0.00286938	C_7
AGAP011896	RpL31	60S ribosomal protein L31 [Source:VB Community Annotation]	1.54638e-06	-1.44651	0.421	0.799	0.0203056	C_7
AGAP002122	RpL32	60S ribosomal protein L32 [Source:VB Community Annotation]	5.92436e-09	-1.886	0.342	0.822	7.77928e-05	C_7
AGAP009324	RpL34	60S ribosomal protein L34 [Source:VB Community Annotation]	3.66523e-07	-1.49532	0.474	0.813	0.00481281	C_7
AGAP001408	RpL35	60S ribosomal protein L35 [Source:VB Community Annotation]	5.82157e-09	-2.03644	0.316	0.79	7.6443e-05	C_7
AGAP002754	RpL35a	60S ribosomal protein L35a [Source:VB Community Annotation]	7.95705e-10	-1.77846	0.447	0.888	1.04484e-05	C_7
AGAP002921	RpL36	60S ribosomal protein L36 [Source:UniProtKB/TrEMBL%3BAcc:Q7PQY8]	1.31552e-07	-1.52339	0.526	0.827	0.00172741	C_7
AGAP003538	RpL36a	60S ribosomal protein L36a [Source:VB Community Annotation]	2.84268e-09	-1.96901	0.368	0.813	3.73272e-05	C_7
AGAP000952	RpL37	60S ribosomal protein L37 [Source:VB Community Annotation]	6.03397e-10	-1.7834	0.526	0.883	7.92321e-06	C_7
AGAP010163	RpL38	60S ribosomal protein L38 [Source:UniProtKB/Swiss-Prot%3BAcc:Q7Q0U1]	2.72304e-09	-1.8374	0.368	0.86	3.57562e-05	C_7
AGAP011802	RpL39	60S ribosomal protein L39 [Source:VB Community Annotation]	2.67804e-08	-1.90789	0.342	0.799	0.000351654	C_7
AGAP002306	RpL4	60S ribosomal protein L4 [Source:VB Community Annotation]	3.96607e-07	-1.44953	0.5	0.827	0.00520784	C_7
AGAP007927	RpL40	60S ribosomal protein L40 [Source:VB Community Annotation]	7.51245e-09	-1.784	0.421	0.827	9.8646e-05	C_7
AGAP007087	RpL41	60s ribosomal protein L41 [Source:UniProtKB/TrEMBL%3BAcc:Q52P89]	4.30121e-08	-1.53555	0.553	0.883	0.000564791	C_7
AGAP009031	RpL5	60S ribosomal protein L5 [Source:VB Community Annotation]	6.29258e-10	-2.12617	0.342	0.827	8.26279e-06	C_7
AGAP001911	RpL6	60S ribosomal protein L6 [Source:VB Community Annotation]	8.49026e-08	-1.6162	0.474	0.799	0.00111486	C_7
AGAP008916	RpL7	60S ribosomal protein L7 [Source:VB Community Annotation]	1.27329e-08	-1.59441	0.579	0.893	0.000167196	C_7
AGAP005960	RpL7a	60S ribosomal protein L7a [Source:UniProtKB/Swiss-Prot%3BAcc:O76732]	2.541e-08	-1.56368	0.526	0.85	0.000333658	C_7
AGAP005802	RpL8	60S ribosomal protein L8 [Source:UniProtKB/Swiss-Prot%3BAcc:Q9U9L2]	6.14452e-08	-1.47182	0.553	0.874	0.000806837	C_7
AGAP009508	RpL9	60S ribosomal protein L9 [Source:VB Community Annotation]	7.37268e-09	-1.81316	0.395	0.827	9.68107e-05	C_7
AGAP003592	RpLP0	60S ribosomal protein LP0 [Source:VB Community Annotation]	6.85367e-07	-1.35337	0.684	0.897	0.00899956	C_7
AGAP007740	RpLP1	60S ribosomal protein LP1 [Source:VB Community Annotation]	1.13244e-07	-1.40219	0.632	0.874	0.00148701	C_7
AGAP003025	RpLp2	60S ribosomal protein LP2 [Source:VB Community Annotation]	3.08025e-07	-1.51988	0.474	0.846	0.00404468	C_7
AGAP001662		ADAM-TS Spacer 1	1.81651e-09	-1.88104	0.474	0.827	2.38526e-05	C_7
AGAP006782		ADP%2CATP carrier protein 1 [Source:VB Community Annotation]	1.43902e-06	-1.16018	0.789	0.916	0.0188958	C_7
AGAP012053		alpha%2Calpha-trehalase [Source:VB Community Annotation]	9.57915e-07	-2.00193	0.237	0.64	0.0125784	C_7
AGAP013103		Anopheles-specific TM protein	5.79096e-07	-1.89034	0.237	0.729	0.00760411	C_7
AGAP007131		AP-2 complex subunit mu-1 [Source:VB Community Annotation]	1.61143e-06	-1.6805	0.237	0.696	0.0211597	C_7
AGAP002594		apolipoprotein D [Source:VB Community Annotation]	4.16488e-08	-2.01943	0.342	0.743	0.00054689	C_7
AGAP002182	ABCE1	ATP-binding cassette transporter (ABC transporter) family E member 1 [Source:VB Community Annotation]	4.79074e-07	-3.26227	0.053	0.514	0.00629072	C_7
AGAP005775		Bax inhibitor 1 [Source:VB Community Annotation]	4.00231e-07	-2.1075	0.211	0.65	0.00525543	C_7
AGAP010557		B-cell receptor-associated protein 31 [Source:VB Community Annotation]	2.10536e-06	-4.73595	0	0.411	0.0276454	C_7
AGAP010957		calmodulin [Source:VB Community Annotation]	2.21963e-07	-2.12162	0.211	0.664	0.0029146	C_7
AGAP004212	Crc	calreticulin [Source:VB Community Annotation]	5.09559e-08	-1.71151	0.368	0.785	0.000669102	C_7
AGAP000790		Calycin-like	1.26548e-09	-1.7665	0.5	0.822	1.66171e-05	C_7
AGAP013509		carboxylesterase clade H%2C member 1 [Source:VB Community Annotation]	3.78399e-08	-1.99194	0.289	0.729	0.000496875	C_7
AGAP004533		cathepsin B [Source:VB Community Annotation]	8.63872e-07	-1.68399	0.316	0.71	0.0113435	C_7
AGAP003277		cathepsin D [Source:VB Community Annotation]	1.15905e-06	-2.44286	0.105	0.556	0.0152195	C_7
AGAP002879		cathepsin F [Source:VB Community Annotation]	5.03879e-07	-2.1736	0.316	0.664	0.00661643	C_7
AGAP011828	Cp1	cathepsin L [Source:VB Community Annotation]	6.99879e-08	-2.13256	0.316	0.72	0.000919011	C_7
AGAP006921		CED6	2.68794e-07	-2.51556	0.211	0.626	0.00352954	C_7
AGAP011974	SCRC1	Class C Scavenger Receptor (Sushi/SCR/CCP and Somatomedin B domains). [Source:VB Community Annotation]	1.09008e-09	-2.16224	0.342	0.766	1.43138e-05	C_7
AGAP002422	CLIPD1	CLIP-domain serine protease [Source:VB Community Annotation]	5.18782e-07	-1.43815	0.553	0.794	0.00681213	C_7
AGAP012056		cofilin [Source:VB Community Annotation]	1.47974e-10	-2.52802	0.132	0.771	1.94305e-06	C_7
AGAP000375		Coiled-coil-helix-coiled-coil-helix domain-containing protein 3, mitochondrial	2.47498e-06	-3.83863	0.026	0.435	0.0324989	C_7
AGAP009200		collagen type IV alpha [Source:VB Community Annotation]	3.50332e-09	-1.72106	0.579	0.846	4.60021e-05	C_7
AGAP009201		collagen type IV alpha [Source:VB Community Annotation]	2.22429e-10	-2.42782	0.211	0.78	2.92071e-06	C_7
AGAP003304		CREG/Cellular Repressor of E1A- and JH-stimulated Genes	5.94521e-07	-2.98475	0.079	0.528	0.00780665	C_7
AGAP008727		cytochrome c oxidase subunit 4%2C mitochondrial precursor [Source:VB Community Annotation]	4.0172e-09	-3.12864	0.105	0.65	5.27498e-05	C_7
AGAP000851		cytochrome c oxidase subunit 6a%2C mitochrondrial [Source:VB Community Annotation]	6.40756e-09	-3.17154	0.053	0.621	8.41377e-05	C_7
AGAP011159	CoVa	cytochrome c oxidase subunit Va [Source:VB Community Annotation]	1.09106e-08	-2.98236	0.079	0.626	0.000143268	C_7
AGAP013092		cytochrome c oxidase subunit VIb polypeptide 1 [Source:VB Community Annotation]	1.30747e-07	-2.54397	0.079	0.603	0.00171684	C_7
AGAP000109		cytochrome c oxidase subunit VIIa [Source:VB Community Annotation]	2.38464e-06	-1.91065	0.184	0.64	0.0313127	C_7
AGAP007621		cytochrome c oxidase VIIc [Source:VB Community Annotation]	1.90964e-07	-2.1701	0.158	0.668	0.00250755	C_7
AGAP007609		DAZ associated protein 2	7.41144e-08	-2.67675	0.184	0.621	0.000973197	C_7
AGAP011629		dihydrolipoamide dehydrogenase [Source:VB Community Annotation]	6.76171e-07	-2.67829	0.132	0.57	0.00887881	C_7
AGAP029055	eater	Eater	2.24343e-08	-2.2752	0.184	0.692	0.000294584	C_7
AGAP004936		EGF repeats	1.62471e-06	-1.07641	0.947	0.967	0.0213341	C_7
AGAP007406		Elongation factor 1-alpha [Source:UniProtKB/TrEMBL%3BAcc:Q7PT29]	1.0148e-06	-1.3284	0.868	0.949	0.0133253	C_7
AGAP010612		elongation factor 1-beta [Source:VB Community Annotation]	9.11172e-08	-2.44795	0.105	0.631	0.00119646	C_7
AGAP000883		elongation factor 1-gamma [Source:VB Community Annotation]	2.2348e-07	-1.69093	0.342	0.757	0.00293451	C_7
AGAP009441		elongation factor 2 [Source:VB Community Annotation]	2.27598e-07	-1.3336	0.605	0.897	0.00298859	C_7
AGAP010558		ER membrane protein complex subunit 4 [Source:UniProtKB/TrEMBL%3BAcc:Q7Q8U0]	6.57376e-07	-3.56842	0.026	0.481	0.00863201	C_7
AGAP028997	SSU_rRNA_eukarya	Eukaryotic small subunit ribosomal RNA [Source:RFAM%3BAcc:RF01960]	1.99383e-06	-1.74626	0.237	0.706	0.026181	C_7
AGAP028979	SSU_rRNA_eukarya	Eukaryotic small subunit ribosomal RNA [Source:RFAM%3BAcc:RF01960]	3.40563e-06	-2.00195	0.158	0.636	0.0447193	C_7
AGAP029038	SSU_rRNA_eukarya	Eukaryotic small subunit ribosomal RNA [Source:RFAM%3BAcc:RF01960]	3.49254e-09	-2.42561	0.184	0.752	4.58606e-05	C_7
AGAP006944	eIF3e	Eukaryotic translation initiation factor 3 subunit E [Source:UniProtKB/Swiss-Prot%3BAcc:Q7QIL8]	1.56613e-08	-2.9952	0.053	0.612	0.000205648	C_7
AGAP011580	eIF3k	Eukaryotic translation initiation factor 3 subunit K [Source:UniProtKB/Swiss-Prot%3BAcc:Q7QGK4]	1.02692e-06	-2.54263	0.079	0.537	0.0134845	C_7
AGAP011284		Eukaryotic translation initiation factor 5A [Source:UniProtKB/TrEMBL%3BAcc:Q7PSR5]	6.79881e-08	-1.63161	0.474	0.827	0.000892751	C_7
AGAP010580		Farnesoic acid 0-methyl transferase	1.47586e-10	-2.96753	0.105	0.72	1.93796e-06	C_7
AGAP011228		FBN2	2.08708e-06	-1.64542	0.605	0.832	0.0274054	C_7
AGAP011197	FBN9	FBN9	1.0439e-09	-1.70807	0.632	0.921	1.37075e-05	C_7
AGAP012184		FK506-binding protein 1 [Source:VB Community Annotation]	1.83286e-06	-1.75455	0.289	0.706	0.0240673	C_7
AGAP008822		FK506-binding protein 14 [Source:VB Community Annotation]	9.29429e-09	-2.31158	0.211	0.706	0.000122043	C_7
AGAP003599		F-type H+-transporting ATPase oligomycin sensitivity conferral protein [Source:VB Community Annotation]	1.15343e-08	-3.41049	0.105	0.612	0.000151457	C_7
AGAP004616		F-type H+-transporting ATPase subunit 6 [Source:VB Community Annotation]	7.80175e-07	-2.55057	0.132	0.593	0.0102445	C_7
AGAP000523		F-type H+-transporting ATPase subunit c [Source:VB Community Annotation]	1.14287e-07	-2.3108	0.158	0.673	0.00150071	C_7
AGAP012515		F-type H+-transporting ATPase subunit f [Source:VB Community Annotation]	1.89796e-07	-1.8724	0.184	0.72	0.00249221	C_7
AGAP009491		F-type H+-transporting ATPase subunit g [Source:VB Community Annotation]	1.3539e-07	-2.31373	0.184	0.682	0.0017778	C_7
AGAP007966		F-type H+-transporting ATPase subunit gamma [Source:VB Community Annotation]	2.0668e-06	-2.25394	0.158	0.584	0.0271392	C_7
AGAP009738	GRX3	glutaredoxin [Source:VB Community Annotation]	3.48034e-06	-2.80935	0.105	0.528	0.0457004	C_7
AGAP011107	GRX1	glutaredoxin [Source:VB Community Annotation]	7.96636e-07	-2.95063	0.079	0.537	0.0104606	C_7
AGAP004247	GPXH1	glutathione peroxidase 1 [Source:VB Community Annotation]	1.49506e-06	-2.38437	0.132	0.584	0.0196316	C_7
AGAP000804	GPXH2	glutathione peroxidase 2 [Source:VB Community Annotation]	7.35835e-07	-2.29615	0.132	0.589	0.00966225	C_7
AGAP005749	GSTO1	glutathione S-transferase omega class 1 [Source:VB Community Annotation]	1.40078e-07	-3.33805	0.053	0.547	0.00183937	C_7
AGAP007699		GTP-binding nuclear protein Ran [Source:VB Community Annotation]	1.21886e-06	-1.68639	0.316	0.715	0.0160049	C_7
AGAP004098		GTP-binding protein SAR1 [Source:VB Community Annotation]	8.48233e-07	-2.12199	0.105	0.603	0.0111382	C_7
AGAP010173	Rack1	guanine nucleotide-binding protein subunit beta-like protein [Source:VB Community Annotation]	1.54371e-07	-1.63876	0.395	0.827	0.00202705	C_7
AGAP010589		guanine nucleotide-binding protein subunit gamma [Source:VB Community Annotation]	4.54541e-08	-2.83507	0.079	0.589	0.000596857	C_7
AGAP002076		heat shock 70kDa protein 1/8 [Source:VB Community Annotation]	5.24551e-11	-1.81006	0.632	0.907	6.88788e-07	C_7
AGAP004192		heat shock 70kDa protein 5 [Source:VB Community Annotation]	2.74799e-06	-1.81869	0.289	0.65	0.0360838	C_7
AGAP006958	Hsp83	Heat shock protein 83 [Source:UniProtKB/Swiss-Prot%3BAcc:Q7PT10]	4.96005e-08	-1.8447	0.368	0.794	0.000651304	C_7
AGAP000807		helix-loop-helix transcription factor [Source:VB Community Annotation]	2.0317e-06	-1.61751	0.211	0.696	0.0266782	C_7
AGAP007237	HPX4	heme peroxidase 4 [Source:VB Community Annotation]	1.9051e-06	-1.92487	0.342	0.668	0.0250159	C_7
AGAP001930		heterogeneous nuclear ribonucleoprotein 27C [Source:VB Community Annotation]	8.50946e-07	-2.15955	0.184	0.617	0.0111738	C_7
AGAP012334		high mobility group protein D%2C isoform C [Source:VB Community Annotation]	1.54206e-06	-1.43547	0.421	0.771	0.0202488	C_7
AGAP012885		Histone H4 [Source:UniProtKB/TrEMBL%3BAcc:Q7PCX0]	2.07185e-06	-3.64287	0.026	0.449	0.0272055	C_7
AGAP000815	INTB	integrin beta subunit [Source:VB Community Annotation]	2.4608e-06	-2.19243	0.105	0.561	0.0323128	C_7
AGAP004349		K homology RNA-binding domain	1.62739e-09	-2.33466	0.211	0.762	2.13693e-05	C_7
AGAP007629	LANB2	laminin gamma 1 [Source:VB Community Annotation]	1.93983e-09	-2.07136	0.342	0.799	2.54719e-05	C_7
AGAP004993		laminin subunit alpha [Source:VB Community Annotation]	4.68136e-08	-1.35526	0.684	0.902	0.000614709	C_7
AGAP001381		laminin%2C beta 1 [Source:VB Community Annotation]	5.08973e-09	-1.90804	0.474	0.813	6.68333e-05	C_7
AGAP004017	LRR8	Leucine rich repeat (LRR)	8.27684e-09	-2.07246	0.368	0.748	0.000108683	C_7
AGAP013186		Leucine rich repeat (LRR)	3.06119e-06	-3.19892	0.053	0.467	0.0401964	C_7
AGAP028064	LRIM16B	leucine-rich immune protein (TM) [Source:VB Community Annotation]	1.39029e-06	-1.46698	0.447	0.762	0.0182559	C_7
AGAP028028	LRIM16A	leucine-rich immune protein (TM) [Source:VB Community Annotation]	1.7194e-08	-1.91337	0.5	0.776	0.000225775	C_7
AGAP004016		Leucine-rich repeats (LRRs)	3.78554e-07	-1.52368	0.421	0.762	0.00497079	C_7
AGAP028015		LRR	2.89621e-07	-2.6626	0.079	0.556	0.00380302	C_7
AGAP004431		Lysosomal transcription factor, NCU-G1	2.89569e-06	-2.9478	0.079	0.491	0.0380233	C_7
AGAP011119		Lysozyme, I type	6.0956e-07	-2.38715	0.158	0.617	0.00800413	C_7
AGAP000249		mannosyl-glycoprotein endo-beta-N-acetylglucosaminidase [Source:VB Community Annotation]	1.73841e-06	-1.74245	0.474	0.771	0.022827	C_7
AGAP000092		methylsterol monooxygenase [Source:VB Community Annotation]	2.32387e-07	-2.86635	0.079	0.561	0.00305148	C_7
AGAP001502		mitochondrial 10 kDa heat shock protein [Source:VB Community Annotation]	7.94572e-07	-2.35022	0.132	0.598	0.0104335	C_7
AGAP007768		mitochondrial cytochrome c oxidase subunit VIC [Source:VB Community Annotation]	1.85994e-06	-2.07274	0.184	0.64	0.0244229	C_7
AGAP004031		mitochondrial electron transfer flavoprotein subunit alpha [Source:VB Community Annotation]	5.25589e-07	-2.71209	0.079	0.542	0.00690152	C_7
AGAP010876		molecular chaperone DnaK [Source:VB Community Annotation]	2.20409e-07	-2.21021	0.184	0.65	0.00289419	C_7
AGAP006961		molecular chaperone HtpG [Source:VB Community Annotation]	3.35551e-06	-1.94716	0.237	0.664	0.0440612	C_7
AGAP006959		molecular chaperone HtpG [Source:VB Community Annotation]	6.1493e-07	-2.32873	0.184	0.631	0.00807464	C_7
AGAP010727		Mucin	3.79785e-08	-1.58324	0.421	0.808	0.000498696	C_7
AGAP000927		myosin regulatory light chain%2C invertebrate [Source:VB Community Annotation]	2.48022e-09	-2.14932	0.289	0.766	3.25677e-05	C_7
AGAP004721		N-acetylglucosamine-6-sulfatase [Source:VB Community Annotation]	4.22738e-08	-2.76211	0.053	0.593	0.000555097	C_7
AGAP003325		NADH dehydrogenase (ubiquinone) 1 alpha subcomplex 4 [Source:VB Community Annotation]	1.76746e-07	-1.96066	0.211	0.701	0.00232085	C_7
AGAP005621		NADH dehydrogenase (ubiquinone) 1 alpha subcomplex 5 [Source:VB Community Annotation]	1.30652e-06	-2.97187	0.053	0.505	0.0171559	C_7
AGAP000849		NADH dehydrogenase (ubiquinone) 1 beta subcomplex 1 [Source:VB Community Annotation]	2.94414e-06	-2.43194	0.079	0.528	0.0386595	C_7
AGAP007380		NADH dehydrogenase (ubiquinone) 1 beta subcomplex 11 [Source:VB Community Annotation]	2.33373e-06	-3.04866	0.053	0.481	0.0306441	C_7
AGAP012374		NADH dehydrogenase (ubiquinone) 1 beta subcomplex 3 [Source:VB Community Annotation]	3.6405e-06	-2.14288	0.079	0.519	0.0478034	C_7
AGAP007297		NADH dehydrogenase (ubiquinone) 1 beta subcomplex 5 [Source:VB Community Annotation]	4.85753e-07	-3.33294	0.053	0.514	0.00637843	C_7
AGAP009493	alpha9	nicotinic acetylcholine receptor subunit alpha 9 [Source:VB Community Annotation]	3.25804e-06	-2.08856	0.132	0.579	0.0427813	C_7
AGAP028108		Niemann-Pick type C2 (Npc2) is a lysosomal protein in which a mutation in the gene causes a rare form of Niemann-Pick type C disease	2.52141e-06	-3.15847	0.026	0.453	0.0331086	C_7
AGAP029054	NimB2	nimrod B2 [Source:VB Community Annotation]	2.5571e-12	-1.47509	0.947	0.986	3.35773e-08	C_7
AGAP006745		Ninjurin	1.7805e-06	-2.36956	0.105	0.556	0.0233798	C_7
AGAP004395		nucleophosmin 3 [Source:VB Community Annotation]	2.5519e-07	-1.79415	0.289	0.71	0.0033509	C_7
AGAP001928		nucleosome assembly protein 1-like 1 [Source:VB Community Annotation]	1.73864e-07	-2.74932	0.158	0.603	0.00228301	C_7
AGAP011034		Odz%2C odd Oz/ten-m homolog 1 [Source:VB Community Annotation]	5.31447e-07	-1.56288	0.447	0.771	0.00697843	C_7
AGAP007638		oligosaccharyltransferase complex subunit delta (ribophorin II) [Source:VB Community Annotation]	1.75144e-06	-2.92871	0.105	0.514	0.0229982	C_7
AGAP008491		oligosaccharyltransferase complex subunit epsilon [Source:VB Community Annotation]	1.32992e-07	-3.167	0.079	0.57	0.00174632	C_7
AGAP010010		oligosaccharyltransferase complex subunit gamma [Source:VB Community Annotation]	1.41589e-06	-2.42135	0.105	0.561	0.018592	C_7
AGAP005558		peptidase (mitochondrial processing) beta [Source:VB Community Annotation]	1.76948e-06	-2.40701	0.132	0.561	0.0232351	C_7
AGAP007088		peptidyl-prolyl cis-trans isomerase B (cyclophilin B) [Source:VB Community Annotation]	7.55253e-08	-1.89038	0.289	0.738	0.000991723	C_7
AGAP000462		peptidyl-prolyl isomerase F (cyclophilin D) [Source:VB Community Annotation]	7.86131e-07	-1.82804	0.395	0.734	0.0103227	C_7
AGAP013333		Phosphate carrier%2C mitochondrial [Source:VB Community Annotation]	8.672e-07	-1.75316	0.289	0.701	0.0113872	C_7
AGAP001470		Phosphoinositide-dependent kinase 1	1.22155e-07	-1.93031	0.447	0.729	0.00160402	C_7
AGAP001264		Plasma glutamate carboxypeptidase [Source:VB Community Annotation]	4.95318e-07	-2.17747	0.237	0.64	0.00650402	C_7
AGAP002599		polyubiquitin [Source:VB Community Annotation]	1.15068e-07	-1.99091	0.316	0.724	0.00151096	C_7
AGAP001971		Polyubiquitin-C [Source:VB Community Annotation]	4.50867e-08	-2.89806	0.105	0.621	0.000592033	C_7
AGAP011165		prefoldin [Source:VB Community Annotation]	1.50054e-06	-3.29717	0.053	0.481	0.0197036	C_7
AGAP005432		programmed cell death protein 5 [Source:VB Community Annotation]	7.63536e-07	-3.51016	0.026	0.477	0.010026	C_7
AGAP007393		protein disulfide isomerase family A%2C member 3 [Source:VB Community Annotation]	4.85207e-09	-2.66553	0.263	0.696	6.37125e-05	C_7
AGAP012407		protein disulfide-isomerase A1 [Source:VB Community Annotation]	5.02646e-07	-1.62817	0.368	0.743	0.00660025	C_7
AGAP010755		protein mago nashi [Source:VB Community Annotation]	1.9759e-06	-3.524	0.026	0.453	0.0259455	C_7
AGAP006459	SUI1	Protein translation factor SUI1 homolog [Source:UniProtKB/Swiss-Prot%3BAcc:P42678]	1.04973e-07	-1.64575	0.474	0.804	0.00137841	C_7
AGAP002655		putative splicing regulator	3.297e-06	-1.65802	0.158	0.626	0.0432929	C_7
AGAP012145		Reactive oxygen species modulator 1 [Source:VB Community Annotation]	3.30442e-07	-4.20246	0.026	0.486	0.00433903	C_7
AGAP002464		secreted ferritin G subunit [Source:VB Community Annotation]	3.01425e-11	-2.11877	0.395	0.836	3.95802e-07	C_7
AGAP000358		Selenoprotein SelK/SelG	8.72581e-08	-3.39428	0.053	0.547	0.00114579	C_7
AGAP008000		sepiapterin reductase [Source:VB Community Annotation]	1.93989e-06	-2.78828	0.158	0.561	0.0254727	C_7
AGAP004296		signal peptidase complex subunit 1 [Source:VB Community Annotation]	2.83981e-07	-3.20955	0.053	0.537	0.00372895	C_7
AGAP011842		signal peptidase complex subunit 2 [Source:VB Community Annotation]	8.20006e-08	-3.87859	0.026	0.528	0.00107675	C_7
AGAP000852		Small ubiquitin-related modifier [Source:UniProtKB/TrEMBL%3BAcc:Q7PNJ2]	7.05923e-09	-2.26891	0.184	0.724	9.26948e-05	C_7
AGAP001701		Small ubiquitin-related modifier [Source:UniProtKB/TrEMBL%3BAcc:Q7PY16]	3.37159e-07	-2.81726	0.105	0.565	0.00442724	C_7
AGAP000305		SPARC [Source:VB Community Annotation]	5.28823e-11	-1.6227	0.658	0.902	6.94398e-07	C_7
AGAP011940		sphingomyelin phosphodiesterase [Source:VB Community Annotation]	3.84441e-07	-2.00403	0.316	0.687	0.0050481	C_7
AGAP012307		Spondin-1 [Source:VB Community Annotation]	1.80514e-08	-2.79183	0.132	0.626	0.000237033	C_7
AGAP001548		Stress-associated endoplasmic reticulum protein 2 [Source:VB Community Annotation]	3.05537e-07	-1.9934	0.237	0.71	0.00401201	C_7
AGAP000618		succinate dehydrogenase (ubiquinone) membrane anchor subunit [Source:VB Community Annotation]	6.78113e-07	-4.55961	0	0.439	0.0089043	C_7
AGAP002759		T-complex protein 1 subunit gamma [Source:UniProtKB/TrEMBL%3BAcc:Q7QCQ5]	2.26955e-07	-2.90111	0.053	0.537	0.00298015	C_7
AGAP007209		Tetraspanin [Source:UniProtKB/TrEMBL%3BAcc:Q7PTA7]	2.21188e-07	-1.97132	0.263	0.696	0.00290443	C_7
AGAP000044		thioredoxin domain-containing protein [Source:VB Community Annotation]	1.19236e-06	-2.41516	0.184	0.579	0.0156569	C_7
AGAP006614		transcription factor BTF3 homolog 4 [Source:VB Community Annotation]	1.14665e-07	-1.75675	0.263	0.766	0.00150567	C_7
AGAP000376	Tsf1	transferrin 1	2.79045e-07	-1.43372	0.711	0.86	0.00366414	C_7
AGAP003119		translation initiation factor 1A [Source:VB Community Annotation]	9.77856e-09	-2.62424	0.158	0.664	0.000128402	C_7
AGAP002667	Tctp	Translationally-controlled tumor protein homolog [Source:UniProtKB/Swiss-Prot%3BAcc:Q7QCK2]	1.53351e-07	-1.61961	0.579	0.822	0.00201366	C_7
AGAP001219	TUB4A	tubulin alpha-4A chain [Source:VB Community Annotation]	1.10893e-06	-2.93313	0.026	0.477	0.0145613	C_7
AGAP007643		Tyrosine 3-monooxygenase/tryptophan 5-monooxygenase activation protein%2C beta polypeptide 2 [Source:VB Community Annotation]	3.36971e-08	-1.58148	0.421	0.841	0.000442477	C_7
AGAP008163		U4/U6 small nuclear ribonucleoprotein SNU13 [Source:VB Community Annotation]	1.61529e-08	-4.38772	0.026	0.547	0.000212104	C_7
AGAP010337		ubiquinol-cytochrome c reductase subunit 8 [Source:VB Community Annotation]	4.11968e-08	-2.8906	0.079	0.607	0.000540955	C_7
AGAP004710		ubiquinol-cytochrome c reductase subunit 9 [Source:VB Community Annotation]	2.56149e-08	-5.00269	0	0.514	0.000336349	C_7
AGAP011076		ubiquitin-conjugating enzyme E2 I [Source:VB Community Annotation]	5.26994e-08	-3.0136	0.053	0.57	0.000691996	C_7
AGAP007366		Uncharacterised protein family, CD034/YQF4	9.29e-07	-1.92851	0.263	0.682	0.0121987	C_7
AGAP028439		Unknown	2.21042e-06	-1.64167	0.289	0.664	0.029025	C_7
AGAP007312		Unknown	2.38206e-06	-1.69953	0.263	0.687	0.0312788	C_7
AGAP005611		Unknown	1.12491e-07	-2.18035	0.184	0.678	0.00147711	C_7
AGAP012708		Unknown	4.92293e-09	-2.26004	0.184	0.78	6.46429e-05	C_7
AGAP000385		Unknown	1.47058e-07	-2.3713	0.184	0.64	0.00193102	C_7
AGAP000669		Unknown	1.60006e-06	-2.3877	0.105	0.57	0.0210104	C_7
AGAP005820		Unknown	1.15943e-06	-2.52528	0.079	0.542	0.0152245	C_7
AGAP003864		Unknown	1.43848e-06	-2.6745	0.053	0.514	0.0188887	C_7
AGAP000268		Unknown	1.65271e-08	-3.85586	0.026	0.565	0.000217017	C_7
AGAP012813		Unknown	2.10536e-06	-4.22316	0	0.411	0.0276454	C_7
AGAP011567		Unknown	1.45111e-06	-4.57423	0	0.421	0.0190545	C_7
AGAP003430	VhaM8.9	vacuolar H+ ATPase M8.9 accessory subunit [Source:VB Community Annotation]	2.628e-06	-2.372	0.132	0.561	0.0345083	C_7
AGAP002338		vacuolar protein sorting 29 homolog [Source:VB Community Annotation]	7.4929e-07	-2.59778	0.079	0.551	0.00983893	C_7
AGAP002401		V-type H+-transporting ATPase subunit E [Source:VB Community Annotation]	4.16972e-07	-3.3374	0.053	0.514	0.00547525	C_7
AGAP028154		V-type proton ATPase proteolipid subunit [Source:UniProtKB/TrEMBL%3BAcc:A0A1S4HCY4]	2.14524e-08	-1.65213	0.474	0.85	0.000281691	C_7
AGAP010623		X box-binding protein 1 [Source:VB Community Annotation]	1.44776e-07	-3.84092	0.053	0.519	0.00190106	C_7
AGAP000739	RpS10	40S ribosomal protein S10 [Source:VB Community Annotation]	3.53881e-10	-3.47475	0.292	0.829	4.64682e-06	C_8
AGAP009998	RpS11	40S ribosomal protein S11 [Source:UniProtKB/Swiss-Prot%3BAcc:P52812]	1.27027e-09	-2.93073	0.333	0.816	1.668e-05	C_8
AGAP011077	RpS12	40S ribosomal protein S12 [Source:UniProtKB/TrEMBL%3BAcc:Q7PSP8]	4.42297e-09	-2.53478	0.375	0.82	5.8078e-05	C_8
AGAP005947	RpS13	40S ribosomal protein S13 [Source:UniProtKB/Swiss-Prot%3BAcc:P52811]	1.48587e-10	-4.54859	0.083	0.807	1.95109e-06	C_8
AGAP000655	RpS14-1	40S ribosomal protein S14a [Source:UniProtKB/Swiss-Prot%3BAcc:Q7QEH1]	8.71681e-08	-2.71093	0.333	0.75	0.0011446	C_8
AGAP002346	RpS14-2	40S ribosomal protein S14b [Source:UniProtKB/Swiss-Prot%3BAcc:Q7QBX2]	9.21964e-09	-4.06353	0.125	0.737	0.000121063	C_8
AGAP001274	RpS15	40S ribosomal protein S15 [Source:VB Community Annotation]	1.53456e-10	-3.74064	0.25	0.833	2.01503e-06	C_8
AGAP000541	RpS15a-1	40S ribosomal protein S15a [Source:VB Community Annotation]	3.87036e-10	-4.06199	0.167	0.807	5.08217e-06	C_8
AGAP009572	RpS15a-2	40S ribosomal protein S15a [Source:VB Community Annotation]	5.93683e-08	-4.68314	0.042	0.667	0.000779565	C_8
AGAP011424	RpS16	40S ribosomal protein S16 [Source:VB Community Annotation]	1.46796e-09	-2.85184	0.375	0.825	1.92758e-05	C_8
AGAP004887	RpS17	40S ribosomal protein S17 [Source:UniProtKB/Swiss-Prot%3BAcc:Q9U9L1]	6.07292e-11	-2.94521	0.417	0.873	7.97435e-07	C_8
AGAP028693	RpS18	40S ribosomal protein S18 [Source:VB Community Annotation]	1.44295e-10	-3.3424	0.292	0.842	1.89474e-06	C_8
AGAP010933	RpS19	40S ribosomal protein S19 [Source:VB Community Annotation]	2.88469e-10	-3.72895	0.208	0.82	3.78788e-06	C_8
AGAP003768	RpS2	40S ribosomal protein S2 [Source:VB Community Annotation]	8.08241e-09	-2.33921	0.75	0.846	0.00010613	C_8
AGAP010591	RpS20	40S ribosomal protein S20 [Source:VB Community Annotation]	1.69625e-10	-3.85725	0.208	0.829	2.22734e-06	C_8
AGAP009431	RpS21	40S ribosomal protein S21 [Source:UniProtKB/TrEMBL%3BAcc:Q7PTN4]	7.97416e-10	-3.30093	0.208	0.816	1.04709e-05	C_8
AGAP012990	RpS23	40S ribosomal protein S23 [Source:VB Community Annotation]	5.55496e-08	-2.07186	0.625	0.82	0.000729421	C_8
AGAP005131	RpS24	40S ribosomal protein S24 [Source:UniProtKB/TrEMBL%3BAcc:Q7PQ02]	1.21791e-11	-4.46615	0.125	0.86	1.59924e-07	C_8
AGAP004462	RpS25	40S ribosomal protein S25 [Source:VB Community Annotation]	2.21091e-10	-3.11234	0.333	0.846	2.90315e-06	C_8
AGAP012100	RpS26	40S ribosomal protein S26 [Source:UniProtKB/Swiss-Prot%3BAcc:Q9GT45]	5.53706e-11	-3.44673	0.292	0.855	7.27072e-07	C_8
AGAP007157	RpS27	40S ribosomal protein S27 [Source:UniProtKB/TrEMBL%3BAcc:Q7PT96]	8.4741e-10	-4.16776	0.167	0.789	1.11273e-05	C_8
AGAP013742		40S ribosomal protein S27a [Source:VB Community Annotation]	6.16292e-11	-3.70048	0.25	0.851	8.09253e-07	C_8
AGAP003412	RpS28	40S ribosomal protein S28 [Source:VB Community Annotation]	7.87813e-09	-4.66753	0.042	0.715	0.000103448	C_8
AGAP001595	RpS29	40S ribosomal protein S29 [Source:VB Community Annotation]	4.52527e-08	-3.06301	0.167	0.732	0.000594213	C_8
AGAP001910	RpS3	40S ribosomal protein S3 [Source:VB Community Annotation]	1.47342e-10	-4.20709	0.125	0.816	1.93475e-06	C_8
AGAP000654	RpS30	40S ribosomal protein S30 [Source:UniProtKB/TrEMBL%3BAcc:Q7QEH2]	3.72623e-09	-2.19101	0.583	0.842	4.89291e-05	C_8
AGAP003532	RpS3a	40S ribosomal protein S3a [Source:UniProtKB/Swiss-Prot%3BAcc:P52813]	1.70839e-11	-2.82511	0.5	0.899	2.24329e-07	C_8
AGAP006871	RpS4	40S ribosomal protein S4 [Source:UniProtKB/TrEMBL%3BAcc:Q7PT95]	2.08704e-10	-3.16516	0.333	0.846	2.7405e-06	C_8
AGAP008329	RpS5	40S ribosomal protein S5 [Source:VB Community Annotation]	4.13825e-09	-2.981	0.333	0.803	5.43394e-05	C_8
AGAP002919	RpS6	40S ribosomal protein S6 [Source:VB Community Annotation]	4.10473e-11	-4.64934	0.167	0.842	5.38992e-07	C_8
AGAP010592	S7	40S ribosomal protein S7 [Source:UniProtKB/Swiss-Prot%3BAcc:P33514]	5.98212e-09	-3.36705	0.25	0.776	7.85513e-05	C_8
AGAP002437	RpS8	40S ribosomal protein S8 [Source:UniProtKB/TrEMBL%3BAcc:Q7QC42]	1.4985e-11	-3.75531	0.292	0.877	1.96769e-07	C_8
AGAP005061	RpS9	40S ribosomal protein S9 [Source:VB Community Annotation]	6.31571e-09	-3.12235	0.292	0.785	8.29316e-05	C_8
AGAP011777	RpSA	40S ribosomal protein SA [Source:UniProtKB/Swiss-Prot%3BAcc:Q7PZ81]	2.00121e-10	-3.43108	0.292	0.838	2.62779e-06	C_8
AGAP000953	RpL10-1	60S ribosomal protein L10-1 [Source:VB Community Annotation]	4.1764e-10	-4.57694	0.125	0.794	5.48403e-06	C_8
AGAP002395	RpL10-2	60S ribosomal protein L10-2 [Source:VB Community Annotation]	6.08857e-10	-3.50328	0.292	0.82	7.9949e-06	C_8
AGAP011298	RpL10a	60S ribosomal protein L10a [Source:VB Community Annotation]	3.01547e-09	-2.55488	0.417	0.825	3.95961e-05	C_8
AGAP011173	RpL11	60S ribosomal protein L11 [Source:VB Community Annotation]	4.59468e-09	-2.76625	0.458	0.82	6.03327e-05	C_8
AGAP010065	RpL12	60S ribosomal protein L12 [Source:VB Community Annotation]	4.97874e-09	-2.73007	0.375	0.807	6.53758e-05	C_8
AGAP001805	RpL13	60S ribosomal protein L13 [Source:UniProtKB/TrEMBL%3BAcc:Q7PUQ7]	1.88196e-09	-2.71987	0.417	0.825	2.4712e-05	C_8
AGAP010257	RpL13a	60S ribosomal protein L13a [Source:VB Community Annotation]	2.05301e-10	-2.57881	0.542	0.873	2.69581e-06	C_8
AGAP005991	RpL14	60S ribosomal protein L14 [Source:VB Community Annotation]	7.51736e-11	-3.99367	0.208	0.838	9.87105e-07	C_8
AGAP004919	RpL15	60S ribosomal protein L15 [Source:UniProtKB/Swiss-Prot%3BAcc:P52818]	2.54853e-10	-4.30895	0.125	0.807	3.34647e-06	C_8
AGAP001459	RpL17	60S ribosomal protein L17 [Source:UniProtKB/Swiss-Prot%3BAcc:A0NGY0]	4.73215e-12	-4.17769	0.208	0.886	6.21378e-08	C_8
AGAP007580	RpL18	60S ribosomal protein L18 [Source:UniProtKB/Swiss-Prot%3BAcc:Q7QJM5]	3.25991e-10	-4.26969	0.167	0.807	4.28059e-06	C_8
AGAP012284	RpL18a-1	60S ribosomal protein L18a [Source:UniProtKB/TrEMBL%3BAcc:Q7PV82]	6.31606e-11	-4.57751	0.125	0.829	8.29362e-07	C_8
AGAP004422	RpL19	60S ribosomal protein L19 [Source:VB Community Annotation]	6.25037e-10	-3.07684	0.333	0.829	8.20736e-06	C_8
AGAP012138	RpL21	60S ribosomal protein L21 [Source:VB Community Annotation]	7.68157e-10	-3.3355	0.25	0.811	1.00867e-05	C_8
AGAP005046	RpL22	60S ribosomal protein L22 [Source:VB Community Annotation]	4.93506e-10	-3.72565	0.208	0.807	6.48022e-06	C_8
AGAP010252	RpL23	60S ribosomal protein L23 [Source:VB Community Annotation]	2.22765e-09	-3.15489	0.333	0.807	2.92512e-05	C_8
AGAP006037	RpL24	60S ribosomal protein L24 [Source:VB Community Annotation]	3.06081e-10	-3.29789	0.375	0.842	4.01914e-06	C_8
AGAP010216	RpL25	60S ribosomal protein L25 [Source:VB Community Annotation]	4.94449e-09	-4.1801	0.125	0.75	6.49261e-05	C_8
AGAP002468	RpL26	60S ribosomal protein L26 [Source:VB Community Annotation]	5.36522e-11	-3.93847	0.25	0.851	7.04506e-07	C_8
AGAP011687	RpL27	60S ribosomal protein L27 [Source:UniProtKB/TrEMBL%3BAcc:Q5TMJ9]	2.50177e-10	-2.83995	0.542	0.864	3.28508e-06	C_8
AGAP011706	RpL27a	60S ribosomal protein L27a [Source:VB Community Annotation]	2.98498e-09	-2.87238	0.417	0.82	3.91958e-05	C_8
AGAP005427	RpL28	60S ribosomal protein L28 [Source:VB Community Annotation]	8.02951e-10	-3.07899	0.333	0.825	1.05436e-05	C_8
AGAP006612	RpL29	60S ribosomal protein L29 [Source:VB Community Annotation]	1.97276e-09	-3.94444	0.125	0.768	2.59043e-05	C_8
AGAP003556	RpL3	60S ribosomal protein L3 [Source:VB Community Annotation]	5.48335e-09	-2.60165	0.458	0.816	7.20019e-05	C_8
AGAP003816	RpL30	60S ribosomal protein L30 [Source:VB Community Annotation]	1.14097e-09	-3.16205	0.25	0.807	1.49821e-05	C_8
AGAP011896	RpL31	60S ribosomal protein L31 [Source:VB Community Annotation]	4.43503e-10	-4.02918	0.167	0.803	5.82364e-06	C_8
AGAP002122	RpL32	60S ribosomal protein L32 [Source:VB Community Annotation]	5.27168e-09	-3.06715	0.333	0.794	6.92224e-05	C_8
AGAP009324	RpL34	60S ribosomal protein L34 [Source:VB Community Annotation]	3.76785e-10	-3.49988	0.208	0.82	4.94756e-06	C_8
AGAP001408	RpL35	60S ribosomal protein L35 [Source:VB Community Annotation]	4.58901e-09	-3.61092	0.208	0.772	6.02582e-05	C_8
AGAP002754	RpL35a	60S ribosomal protein L35a [Source:VB Community Annotation]	2.56735e-10	-2.70231	0.417	0.864	3.37119e-06	C_8
AGAP002921	RpL36	60S ribosomal protein L36 [Source:UniProtKB/TrEMBL%3BAcc:Q7PQY8]	3.83906e-11	-4.03241	0.167	0.846	5.04107e-07	C_8
AGAP003538	RpL36a	60S ribosomal protein L36a [Source:VB Community Annotation]	8.31537e-09	-3.00851	0.292	0.794	0.000109189	C_8
AGAP000952	RpL37	60S ribosomal protein L37 [Source:VB Community Annotation]	2.10772e-11	-3.3896	0.375	0.877	2.76765e-07	C_8
AGAP009920	RpL37a	60S ribosomal protein L37a [Source:VB Community Annotation]	1.99691e-09	-3.18287	0.333	0.807	2.62215e-05	C_8
AGAP010163	RpL38	60S ribosomal protein L38 [Source:UniProtKB/Swiss-Prot%3BAcc:Q7Q0U1]	2.5631e-09	-2.82567	0.417	0.825	3.36561e-05	C_8
AGAP011802	RpL39	60S ribosomal protein L39 [Source:VB Community Annotation]	4.4216e-10	-4.31525	0.125	0.794	5.806e-06	C_8
AGAP002306	RpL4	60S ribosomal protein L4 [Source:VB Community Annotation]	1.72367e-10	-3.8604	0.25	0.833	2.26335e-06	C_8
AGAP007927	RpL40	60S ribosomal protein L40 [Source:VB Community Annotation]	1.08219e-09	-3.15775	0.292	0.816	1.42103e-05	C_8
AGAP007087	RpL41	60s ribosomal protein L41 [Source:UniProtKB/TrEMBL%3BAcc:Q52P89]	3.80079e-11	-3.06344	0.417	0.877	4.99082e-07	C_8
AGAP009031	RpL5	60S ribosomal protein L5 [Source:VB Community Annotation]	9.81741e-09	-3.11609	0.375	0.794	0.000128912	C_8
AGAP001911	RpL6	60S ribosomal protein L6 [Source:VB Community Annotation]	3.18683e-10	-4.01933	0.167	0.811	4.18462e-06	C_8
AGAP008916	RpL7	60S ribosomal protein L7 [Source:VB Community Annotation]	3.17804e-11	-3.1548	0.458	0.886	4.17308e-07	C_8
AGAP005960	RpL7a	60S ribosomal protein L7a [Source:UniProtKB/Swiss-Prot%3BAcc:O76732]	3.18046e-10	-3.09004	0.375	0.846	4.17626e-06	C_8
AGAP005802	RpL8	60S ribosomal protein L8 [Source:UniProtKB/Swiss-Prot%3BAcc:Q9U9L2]	4.09326e-11	-3.31079	0.375	0.873	5.37486e-07	C_8
AGAP009508	RpL9	60S ribosomal protein L9 [Source:VB Community Annotation]	2.82999e-10	-3.63272	0.208	0.82	3.71606e-06	C_8
AGAP003592	RpLP0	60S ribosomal protein LP0 [Source:VB Community Annotation]	4.47454e-12	-3.17997	0.458	0.908	5.87552e-08	C_8
AGAP007740	RpLP1	60S ribosomal protein LP1 [Source:VB Community Annotation]	4.76449e-11	-2.85201	0.417	0.882	6.25626e-07	C_8
AGAP003025	RpLp2	60S ribosomal protein LP2 [Source:VB Community Annotation]	2.83324e-09	-2.56286	0.458	0.825	3.72033e-05	C_8
AGAP000651	Actin5C	Actin-5C [Source:UniProtKB/Swiss-Prot%3BAcc:P84185]	3.05844e-11	-2.57561	0.708	0.921	4.01604e-07	C_8
AGAP001662		ADAM-TS Spacer 1	4.25548e-08	-2.50032	0.458	0.807	0.000558787	C_8
AGAP028370	ATP6	adenosine triphosphatase subunit 6 [Source:European Nucleotide Archive%3BAcc:ATP6]	5.96145e-13	-2.45886	0.875	0.996	7.82797e-09	C_8
AGAP028369	ATP8	adenosine triphosphatase subunit 8 [Source:European Nucleotide Archive%3BAcc:ATP8]	1.71305e-11	-3.60797	0.333	0.939	2.24941e-07	C_8
AGAP006782		ADP%2CATP carrier protein 1 [Source:VB Community Annotation]	1.18784e-10	-2.19913	0.75	0.912	1.55976e-06	C_8
AGAP013103		Anopheles-specific TM protein	8.21543e-08	-3.46995	0.167	0.706	0.00107877	C_8
AGAP004212	Crc	calreticulin [Source:VB Community Annotation]	3.19694e-06	-2.18002	0.542	0.741	0.041979	C_8
AGAP010392		calumenin [Source:VB Community Annotation]	1.39499e-06	-4.25972	0.083	0.605	0.0183177	C_8
AGAP000790		Calycin-like	1.88704e-08	-2.70317	0.5	0.803	0.000247787	C_8
AGAP008075		cellular nucleic acid-binding protein [Source:VB Community Annotation]	7.49066e-08	-2.36627	0.5	0.811	0.000983598	C_8
AGAP011974	SCRC1	Class C Scavenger Receptor (Sushi/SCR/CCP and Somatomedin B domains). [Source:VB Community Annotation]	1.7891e-07	-2.84859	0.333	0.741	0.00234927	C_8
AGAP002422	CLIPD1	CLIP-domain serine protease [Source:VB Community Annotation]	3.11933e-08	-2.79924	0.458	0.789	0.000409599	C_8
AGAP009201		collagen type IV alpha [Source:VB Community Annotation]	9.96354e-08	-3.29429	0.292	0.737	0.00130831	C_8
AGAP009200		collagen type IV alpha [Source:VB Community Annotation]	1.82445e-10	-3.51547	0.333	0.855	2.39569e-06	C_8
AGAP028387	CYTB	cytochrome b [Source:European Nucleotide Archive%3BAcc:CYTB]	9.96993e-14	-2.53647	0.875	1	1.30915e-09	C_8
AGAP008727		cytochrome c oxidase subunit 4%2C mitochondrial precursor [Source:VB Community Annotation]	8.73382e-07	-4.19538	0.083	0.618	0.0114684	C_8
AGAP028364	COX1	cytochrome c oxidase subunit I [Source:European Nucleotide Archive%3BAcc:COX1]	5.4448e-14	-2.4336	0.958	1	7.14956e-10	C_8
AGAP028366	COX2	cytochrome c oxidase subunit II [Source:European Nucleotide Archive%3BAcc:COX2]	2.57816e-13	-2.52668	0.792	0.991	3.38538e-09	C_8
AGAP028371	COX3	cytochrome c oxidase subunit III [Source:European Nucleotide Archive%3BAcc:COX3]	7.6253e-14	-2.46542	0.917	0.996	1.00128e-09	C_8
AGAP011159	CoVa	cytochrome c oxidase subunit Va [Source:VB Community Annotation]	2.77022e-06	-3.86683	0.083	0.592	0.0363758	C_8
AGAP004936		EGF repeats	4.44548e-13	-2.26469	0.958	0.965	5.83735e-09	C_8
AGAP007406		Elongation factor 1-alpha [Source:UniProtKB/TrEMBL%3BAcc:Q7PT29]	2.80193e-12	-2.58385	0.792	0.952	3.67922e-08	C_8
AGAP010612		elongation factor 1-beta [Source:VB Community Annotation]	9.73979e-07	-4.03472	0.042	0.605	0.0127893	C_8
AGAP000883		elongation factor 1-gamma [Source:VB Community Annotation]	1.33758e-07	-2.95207	0.292	0.737	0.00175638	C_8
AGAP009441		elongation factor 2 [Source:VB Community Annotation]	5.90396e-09	-2.08511	0.75	0.864	7.75249e-05	C_8
AGAP028941	LSU_rRNA_eukarya	Eukaryotic large subunit ribosomal RNA [Source:RFAM%3BAcc:RF02543]	3.05369e-10	-1.55363	1	0.991	4.0098e-06	C_8
AGAP028918	LSU_rRNA_eukarya	Eukaryotic large subunit ribosomal RNA [Source:RFAM%3BAcc:RF02543]	1.79238e-12	-1.57822	1	0.978	2.35357e-08	C_8
AGAP028825	LSU_rRNA_eukarya	Eukaryotic large subunit ribosomal RNA [Source:RFAM%3BAcc:RF02543]	2.90737e-13	-1.97644	0.875	0.978	3.81766e-09	C_8
AGAP028970	LSU_rRNA_eukarya	Eukaryotic large subunit ribosomal RNA [Source:RFAM%3BAcc:RF02543]	9.91293e-08	-3.66377	0.125	0.702	0.00130167	C_8
AGAP028997	SSU_rRNA_eukarya	Eukaryotic small subunit ribosomal RNA [Source:RFAM%3BAcc:RF01960]	6.80296e-07	-2.95156	0.167	0.684	0.00893297	C_8
AGAP028876	SSU_rRNA_eukarya	Eukaryotic small subunit ribosomal RNA [Source:RFAM%3BAcc:RF01960]	4.10503e-09	-2.99393	0.292	0.798	5.39031e-05	C_8
AGAP028980	SSU_rRNA_eukarya	Eukaryotic small subunit ribosomal RNA [Source:RFAM%3BAcc:RF01960]	6.14747e-07	-3.12408	0.125	0.689	0.00807224	C_8
AGAP029038	SSU_rRNA_eukarya	Eukaryotic small subunit ribosomal RNA [Source:RFAM%3BAcc:RF01960]	6.59476e-08	-3.21385	0.167	0.719	0.000865958	C_8
AGAP028979	SSU_rRNA_eukarya	Eukaryotic small subunit ribosomal RNA [Source:RFAM%3BAcc:RF01960]	1.62446e-07	-4.76424	0	0.623	0.00213308	C_8
AGAP009863		eukaryotic translation initiation factor 4A%2C isoform 2 [Source:VB Community Annotation]	4.70145e-08	-3.22504	0.208	0.737	0.000617347	C_8
AGAP011284		Eukaryotic translation initiation factor 5A [Source:UniProtKB/TrEMBL%3BAcc:Q7PSR5]	1.31613e-06	-1.9453	0.708	0.781	0.0172821	C_8
AGAP011228		FBN2	4.39457e-07	-2.39643	0.583	0.82	0.00577051	C_8
AGAP011197	FBN9	FBN9	6.12782e-11	-2.70748	0.667	0.899	8.04644e-07	C_8
AGAP002465		ferritin heavy chain [Source:VB Community Annotation]	2.54707e-08	-2.44254	0.5	0.807	0.000334455	C_8
AGAP003599		F-type H+-transporting ATPase oligomycin sensitivity conferral protein [Source:VB Community Annotation]	1.33997e-06	-4.76862	0.042	0.588	0.0175952	C_8
AGAP005134		F-type H+-transporting ATPase subunit alpha [Source:VB Community Annotation]	1.20977e-06	-3.12492	0.167	0.658	0.0158855	C_8
AGAP000523		F-type H+-transporting ATPase subunit c [Source:VB Community Annotation]	6.40449e-07	-3.5023	0.125	0.645	0.00840974	C_8
AGAP011131		F-type H+-transporting ATPase subunit d [Source:VB Community Annotation]	2.39712e-06	-3.72656	0.125	0.61	0.0314765	C_8
AGAP009491		F-type H+-transporting ATPase subunit g [Source:VB Community Annotation]	1.07024e-07	-4.31074	0.042	0.667	0.00140533	C_8
AGAP000804	GPXH2	glutathione peroxidase 2 [Source:VB Community Annotation]	9.28508e-07	-5.66328	0	0.575	0.0121922	C_8
AGAP010173	Rack1	guanine nucleotide-binding protein subunit beta-like protein [Source:VB Community Annotation]	1.89192e-08	-2.49868	0.417	0.798	0.000248428	C_8
AGAP002076		heat shock 70kDa protein 1/8 [Source:VB Community Annotation]	4.0319e-12	-3.63278	0.458	0.908	5.29428e-08	C_8
AGAP004192		heat shock 70kDa protein 5 [Source:VB Community Annotation]	1.08804e-06	-3.29009	0.125	0.645	0.014287	C_8
AGAP006958	Hsp83	Heat shock protein 83 [Source:UniProtKB/Swiss-Prot%3BAcc:Q7PT10]	5.86391e-09	-3.46581	0.25	0.781	7.69989e-05	C_8
AGAP001813		Histone H3 [Source:UniProtKB/TrEMBL%3BAcc:Q7PUQ8]	2.13244e-07	-2.50545	0.333	0.746	0.00280011	C_8
AGAP004349		K homology RNA-binding domain	2.20023e-07	-3.04062	0.292	0.719	0.00288913	C_8
AGAP004993		laminin subunit alpha [Source:VB Community Annotation]	3.72781e-06	-1.5047	0.917	0.864	0.0489499	C_8
AGAP001381		laminin%2C beta 1 [Source:VB Community Annotation]	7.52697e-07	-2.23721	0.542	0.785	0.00988366	C_8
AGAP004017	LRR8	Leucine rich repeat (LRR)	1.23907e-06	-2.65064	0.417	0.719	0.0162703	C_8
AGAP028064	LRIM16B	leucine-rich immune protein (TM) [Source:VB Community Annotation]	2.74463e-06	-2.14227	0.458	0.741	0.0360397	C_8
AGAP028028	LRIM16A	leucine-rich immune protein (TM) [Source:VB Community Annotation]	1.99456e-07	-2.68028	0.417	0.768	0.00261905	C_8
AGAP004016		Leucine-rich repeats (LRRs)	2.08287e-08	-2.99978	0.25	0.759	0.000273501	C_8
AGAP009907		leukotriene-A4 hydrolase [Source:VB Community Annotation]	3.75159e-06	-3.51066	0.125	0.623	0.0492621	C_8
AGAP028391	lsu rRNA	lsu rRNA	1.89617e-13	-2.52996	0.958	0.991	2.48985e-09	C_8
AGAP000249		mannosyl-glycoprotein endo-beta-N-acetylglucosaminidase [Source:VB Community Annotation]	6.30982e-09	-3.87114	0.25	0.776	8.28542e-05	C_8
AGAP008724		mitochondrial cytochrome c oxidase subunit 5B isoform 1 [Source:VB Community Annotation]	2.21357e-06	-3.5117	0.125	0.618	0.0290663	C_8
AGAP010876		molecular chaperone DnaK [Source:VB Community Annotation]	3.57497e-06	-3.46463	0.167	0.623	0.0469429	C_8
AGAP006961		molecular chaperone HtpG [Source:VB Community Annotation]	3.18622e-06	-3.17975	0.208	0.64	0.0418382	C_8
AGAP006959		molecular chaperone HtpG [Source:VB Community Annotation]	3.09489e-06	-3.50186	0.125	0.61	0.040639	C_8
AGAP000927		myosin regulatory light chain%2C invertebrate [Source:VB Community Annotation]	8.04042e-08	-3.24942	0.292	0.737	0.00105579	C_8
AGAP028389	ND1	NADH dehydrogenase subunit 1 [Source:European Nucleotide Archive%3BAcc:ND1]	1.16808e-12	-2.56792	0.75	0.969	1.53381e-08	C_8
AGAP028360	ND2	NADH dehydrogenase subunit 2 [Source:European Nucleotide Archive%3BAcc:ND2]	1.70523e-10	-3.42852	0.417	0.939	2.23914e-06	C_8
AGAP028373	ND3	NADH dehydrogenase subunit 3 [Source:European Nucleotide Archive%3BAcc:ND3]	9.75366e-11	-2.74944	0.625	0.965	1.28075e-06	C_8
AGAP028382	ND4	NADH dehydrogenase subunit 4 [Source:European Nucleotide Archive%3BAcc:ND4]	2.96144e-12	-2.59185	0.708	0.974	3.88867e-08	C_8
AGAP028383	ND4L	NADH dehydrogenase subunit 4L [Source:European Nucleotide Archive%3BAcc:ND4L]	1.14229e-11	-3.02266	0.5	0.952	1.49994e-07	C_8
AGAP028380	ND5	NADH dehydrogenase subunit 5 [Source:European Nucleotide Archive%3BAcc:ND5]	8.37315e-12	-2.46798	0.833	0.978	1.09948e-07	C_8
AGAP028386	ND6	NADH dehydrogenase subunit 6 [Source:European Nucleotide Archive%3BAcc:ND6]	2.85902e-10	-3.34547	0.417	0.939	3.75418e-06	C_8
AGAP006766		nascent polypeptide-associated complex subunit alpha [Source:VB Community Annotation]	3.21821e-07	-2.71063	0.417	0.741	0.00422584	C_8
AGAP029054	NimB2	nimrod B2 [Source:VB Community Annotation]	3.90582e-13	-2.14182	0.958	0.982	5.12873e-09	C_8
AGAP004395		nucleophosmin 3 [Source:VB Community Annotation]	3.25866e-06	-2.5647	0.333	0.68	0.0427894	C_8
AGAP007120		nucleoside-diphosphate kinase [Source:VB Community Annotation]	7.68157e-10	-3.48875	0.25	0.811	1.00867e-05	C_8
AGAP007088		peptidyl-prolyl cis-trans isomerase B (cyclophilin B) [Source:VB Community Annotation]	1.39609e-06	-2.45582	0.333	0.706	0.018332	C_8
AGAP000462		peptidyl-prolyl isomerase F (cyclophilin D) [Source:VB Community Annotation]	3.54838e-08	-3.68563	0.208	0.732	0.000465938	C_8
AGAP013333		Phosphate carrier%2C mitochondrial [Source:VB Community Annotation]	5.49832e-07	-2.99392	0.208	0.684	0.00721984	C_8
AGAP008909		phosphatidylethanolamine binding	1.88157e-09	-4.0905	0.083	0.768	2.47069e-05	C_8
AGAP001470		Phosphoinositide-dependent kinase 1	1.25853e-06	-2.63602	0.375	0.719	0.0165258	C_8
AGAP011092		Polyadenylate-binding protein [Source:UniProtKB/TrEMBL%3BAcc:Q7QH99]	1.19974e-06	-2.40285	0.417	0.728	0.0157537	C_8
AGAP002599		polyubiquitin [Source:VB Community Annotation]	4.61136e-08	-4.05062	0.167	0.715	0.000605517	C_8
AGAP001971		Polyubiquitin-C [Source:VB Community Annotation]	9.25296e-07	-4.84028	0.042	0.596	0.0121501	C_8
AGAP009861		Profilin protein [Source:VB Community Annotation]	6.77947e-08	-2.13212	0.625	0.816	0.000890213	C_8
AGAP007393		protein disulfide isomerase family A%2C member 3 [Source:VB Community Annotation]	3.76991e-06	-3.05581	0.292	0.667	0.0495027	C_8
AGAP006459	SUI1	Protein translation factor SUI1 homolog [Source:UniProtKB/Swiss-Prot%3BAcc:P42678]	1.50595e-07	-2.4897	0.5	0.781	0.00197747	C_8
AGAP002464		secreted ferritin G subunit [Source:VB Community Annotation]	1.10631e-07	-2.25543	0.542	0.794	0.0014527	C_8
AGAP000305		SPARC [Source:VB Community Annotation]	7.7339e-11	-2.68977	0.625	0.89	1.01554e-06	C_8
AGAP028393	ssu rRNA	ssu rRNA	6.93502e-11	-3.79225	0.292	0.895	9.10637e-07	C_8
AGAP009584	TRX1	Thioredoxin [Source:UniProtKB/TrEMBL%3BAcc:Q9NGZ1]	1.03076e-07	-3.50912	0.167	0.702	0.00135348	C_8
AGAP011054	TPX2	thioredoxin peroxidase 2 [Source:VB Community Annotation]	2.02617e-08	-3.84656	0.167	0.732	0.000266056	C_8
AGAP000235		Thymosin [Source:VB Community Annotation]	9.13472e-07	-2.34373	0.333	0.737	0.0119948	C_8
AGAP006614		transcription factor BTF3 homolog 4 [Source:VB Community Annotation]	2.08559e-09	-4.58522	0.083	0.754	2.73859e-05	C_8
AGAP000376	Tsf1	transferrin 1	1.71315e-11	-3.53799	0.333	0.89	2.24954e-07	C_8
AGAP003119		translation initiation factor 1A [Source:VB Community Annotation]	8.43084e-07	-3.81107	0.125	0.636	0.0110705	C_8
AGAP002667	Tctp	Translationally-controlled tumor protein homolog [Source:UniProtKB/Swiss-Prot%3BAcc:Q7QCK2]	4.71911e-09	-2.79633	0.417	0.825	6.19666e-05	C_8
AGAP012708		Unknown	3.33488e-06	-2.18334	0.333	0.728	0.0437903	C_8
AGAP012418		Unknown	2.17986e-06	-2.63428	0.208	0.68	0.0286237	C_8
AGAP028439		Unknown	3.74909e-06	-2.68435	0.208	0.649	0.0492293	C_8
AGAP028154		V-type proton ATPase proteolipid subunit [Source:UniProtKB/TrEMBL%3BAcc:A0A1S4HCY4]	8.43046e-07	-1.82469	0.667	0.807	0.01107	C_8
