# Supplementary material for: Single-cell analysis of mosquito hemocytes identifies signatures of immune cell subtypes and cell differentiation
Source: eLife. 2021 Jul 28;10:e66192. doi: 10.7554/eLife.66192 (PMC8376254; doi:10.7554/eLife.66192)
Supplement: Supplementary file 4. [file elife-66192-supp4.xlsx]

## Sheet: potential_marker_genes
Cluster	Gene ID	Gene Name	Annotation	GO term	combined_pvalue	perc_cells
1	AGAP010519	0	kinesin-like protein unc-104 [Source:VB Community Annotation]	CS	0.000263159	100
1	AGAP007563	0	Unknown	CS	0.00030894	84.6
1	AGAP010147	0	myosin heavy chain [Source:VB Community Annotation]	CS	0.000364687	92.3
1	AGAP028120	D7L3	D7 long form salivary protein [Source:VB Community Annotation]	CSR	0.016071	84.6
1	AGAP001279	0	protein phosphatase 3%2C catalytic subunit [Source:VB Community Annotation]	D	9.1539e-05	92.3
1	AGAP007247	0	hippocalcin-like protein 1 [Source:VB Community Annotation]	D	0.000173985	84.6
1	AGAP006653	0	Protein rogdi [Source:VB Community Annotation]	D	0.00118042	92.3
1	AGAP028730	0	ankyrin [Source:VB Community Annotation]	D	0.00139144	84.6
1	AGAP010214	0	Kruppel homolog 2	D	0.00213218	84.6
1	AGAP007892	0	paired amphipathic helix protein Sin3a [Source:VB Community Annotation]	D	0.00332364	84.6
1	AGAP007717	0	CAP	D	0.00348588	100
1	AGAP008408	0	Unknown	D	0.0134623	84.6
1	AGAP001995	Prosalpha2	26S proteasome alpha 2 subunit [Source:VB Community Annotation]	D	0.0366555	84.6
1	AGAP005528	0	Bax inhibitor 1-related	D	0.0606801	84.6
1	AGAP004096	0	Serine/threonine-protein phosphatase 2A 56 kDa regulatory subunit epsilon [Source:VB Community Annotation]	D	0.0623924	84.6
1	AGAP009621	0	alpha-N-acetylgalactosaminidase [Source:VB Community Annotation]	D	0.0714441	92.3
1	AGAP007045	LRIM15	leucine-rich immune protein (TM) [Source:VB Community Annotation]	I	0.018828	84.6
1	AGAP012399	0	maltase [Source:VB Community Annotation]	M	2.82791e-06	84.6
1	AGAP003874	0	uridine kinase [Source:VB Community Annotation]	M	0.00444448	84.6
1	AGAP008502	0	L-xylulose reductase [Source:VB Community Annotation]	M	0.00665581	84.6
1	AGAP005124	0	Aldehyde dehydrogenase [Source:UniProtKB/TrEMBL%3BAcc:Q7PQ09]	M	0.0100236	92.3
1	AGAP003277	0	cathepsin D [Source:VB Community Annotation]	PROT	0.0799563	100
1	AGAP002862	CYP6AA1	cytochrome P450 [Source:VB Community Annotation]	REDOX/STRESS/MIT	0.000803848	92.3
1	AGAP009652	0	NADH dehydrogenase (ubiquinone) 1 alpha subcomplex 13 [Source:VB Community Annotation]	REDOX/STRESS/MIT	0.0567381	84.6
1	AGAP012281	eIF3m	Eukaryotic translation initiation factor 3 subunit M [Source:UniProtKB/Swiss-Prot%3BAcc:Q7Q068]	RTT	0.0294446	92.3
1	AGAP003709	0	potassium large conductance calcium-activated channel subfamily M alpha member [Source:VB Community Annotation]	TRP	2.55903e-05	92.3
1	AGAP004766	0	endophilin-A [Source:VB Community Annotation]	TRP	0.00237616	84.6
1	AGAP009595	0	sodium/potassium-transporting ATPase subunit beta [Source:VB Community Annotation]	TRP	0.0353616	84.6
1	AGAP009850	0	ATP-binding cassette transporter (ABC transporter) family G member 7 [Source:VB Community Annotation]	TRP	0.0493062	84.6
1	AGAP007585	0	Unknown	U	8.49976e-05	84.6
1	AGAP004691	0	LIM domain-binding protein 1 [Source:VB Community Annotation]	U	0.000167285	84.6
1	AGAP001455	0	Zinc finger, C2H2-like	U	0.000599838	100
1	AGAP004672	0	no circadian temperature entrainment	U	0.0440065	100
2	AGAP000005	0	high mobility group protein B1 [Source:VB Community Annotation]	D	1.68612e-16	100
2	AGAP000044	0	thioredoxin domain-containing protein [Source:VB Community Annotation]	D	9.06851e-24	95.24
2	AGAP000064	plexA	plexin A [Source:VB Community Annotation]	D	1.97447e-05	80.95
2	AGAP000092	0	methylsterol monooxygenase [Source:VB Community Annotation]	M	2.07552e-44	100
2	AGAP000093	0	Unknown	U	1.8151e-07	80.95
2	AGAP000109	0	cytochrome c oxidase subunit VIIa [Source:VB Community Annotation]	REDOX/STRESS/MIT	8.32428e-11	95.24
2	AGAP000145	0	ubiquitin-conjugating enzyme E2D [Source:VB Community Annotation]	D	0.000306384	95.24
2	AGAP000167	0	Lipid storage droplets surface-binding protein 2 [Source:VB Community Annotation]	D	8.40826e-08	85.71
2	AGAP000170	0	NADH dehydrogenase (ubiquinone) Fe-S protein 7 [Source:VB Community Annotation]	REDOX/STRESS/MIT	3.59478e-10	90.48
2	AGAP000235	0	Thymosin [Source:VB Community Annotation]	CS	4.25354e-21	100
2	AGAP000249	0	mannosyl-glycoprotein endo-beta-N-acetylglucosaminidase [Source:VB Community Annotation]	M	5.83776e-39	100
2	AGAP000268	0	Unknown	U	1.65305e-53	95.24
2	AGAP000290	CLIPA27	CLIPA	I	7.98883e-33	100
2	AGAP000305	0	SPARC [Source:VB Community Annotation]	D	3.21415e-152	100
2	AGAP000308	0	proteasome activator subunit 3 (PA28 gamma) [Source:VB Community Annotation]	D	4.23593e-30	95.24
2	AGAP000321	0	Nucleoside phosphorylase	D	7.37253e-25	85.71
2	AGAP000322	0	Adaptin ear-binding coat-associated protein 1 [Source:VB Community Annotation]	D	4.85997e-16	80.95
2	AGAP000323	0	Unknown	CS	6.1563e-07	85.71
2	AGAP000358	0	Selenoprotein SelK/SelG	U	5.02435e-15	90.48
2	AGAP000365	0	alpha-1%2C3-fucosyltransferase [Source:VB Community Annotation]	M	7.95219e-18	80.95
2	AGAP000367	0	glyoxalase domain-containing protein 4 [Source:VB Community Annotation]	M	2.51667e-20	95.24
2	AGAP000375	0	Coiled-coil-helix-coiled-coil-helix domain-containing protein 3, mitochondrial	U	2.98364e-15	95.24
2	AGAP000376	Tsf1	transferrin 1	I	3.77294e-78	100
2	AGAP000385	0	Unknown	U	2.92105e-42	100
2	AGAP000396	TPX1	thioredoxin peroxidase 1 [Source:VB Community Annotation]	I	7.47228e-17	90.48
2	AGAP000399	0	squid [Source:VB Community Annotation]	RTT	1.50722e-08	95.24
2	AGAP000414	0	prostaglandin reductase 1 [Source:VB Community Annotation]	REDOX/STRESS/MIT	1.00443e-24	90.48
2	AGAP000415	0	5-hydroxyisourate hydrolase [Source:VB Community Annotation]	D	5.76817e-16	100
2	AGAP000434	0	dolichyl-diphosphooligosaccharide--protein glycosyltransferase [Source:VB Community Annotation]	M	5.2727e-33	90.48
2	AGAP000439	0	4a-hydroxytetrahydrobiopterin dehydratase [Source:VB Community Annotation]	D	5.00001e-07	80.95
2	AGAP000444	Ciao1	cytosolic iron-sulfur protein assembly protein [Source:VB Community Annotation]	D	5.65458e-14	85.71
2	AGAP000462	0	peptidyl-prolyl isomerase F (cyclophilin D) [Source:VB Community Annotation]	D	2.13195e-60	100
2	AGAP000491	0	HIG1 domain family member 2A [Source:VB Community Annotation]	D	9.99457e-07	85.71
2	AGAP000498	0	nuclear transport factor 2 [Source:VB Community Annotation]	D	5.41677e-07	85.71
2	AGAP000523	0	F-type H+-transporting ATPase subunit c [Source:VB Community Annotation]	TRP	1.65669e-29	100
2	AGAP000526	0	translation initiation factor 4B [Source:VB Community Annotation]	RTT	0.000294674	90.48
2	AGAP000528	0	Basic-leucine zipper domain	D	5.11237e-14	90.48
2	AGAP000541	RpS15a-1	40S ribosomal protein S15a [Source:VB Community Annotation]	RTT	5.15796e-44	100
2	AGAP000546	0	acyl-CoA-binding protein [Source:VB Community Annotation]	M	9.78417e-19	95.24
2	AGAP000562	Moe	Moesin/ezrin/radixin homolog 1 [Source:UniProtKB/Swiss-Prot%3BAcc:Q7PS12]	D	1.93354e-10	95.24
2	AGAP000565	TRXR	thioredoxin reductase [Source:VB Community Annotation]	REDOX/STRESS/MIT	6.94355e-35	100
2	AGAP000616	0	26S proteasome regulatory subunit T5 [Source:VB Community Annotation]	D	1.91615e-24	95.24
2	AGAP000618	0	succinate dehydrogenase (ubiquinone) membrane anchor subunit [Source:VB Community Annotation]	TRP	7.02638e-12	100
2	AGAP000651	Actin5C	Actin-5C [Source:UniProtKB/Swiss-Prot%3BAcc:P84185]	CS	1.32084e-64	100
2	AGAP000654	RpS30	40S ribosomal protein S30 [Source:UniProtKB/TrEMBL%3BAcc:Q7QEH2]	RTT	1.72886e-55	100
2	AGAP000655	RpS14-1	40S ribosomal protein S14a [Source:UniProtKB/Swiss-Prot%3BAcc:Q7QEH1]	RTT	5.66458e-49	100
2	AGAP000669	0	Unknown	U	2.48086e-11	100
2	AGAP000672	0	Obg-like ATPase 1 [Source:UniProtKB/TrEMBL%3BAcc:Q7QEG0]	D	1.21579e-15	90.48
2	AGAP000685	0	Unknown	D	1.19658e-26	85.71
2	AGAP000700	0	Vesicle-associated membrane protein 7 [Source:VB Community Annotation]	TRP	2.51292e-19	80.95
2	AGAP000705	0	protein DJ-1 [Source:VB Community Annotation]	D	1.06725e-09	85.71
2	AGAP000719	Ahcy13	Adenosylhomocysteinase [Source:UniProtKB/Swiss-Prot%3BAcc:O76757]	D	8.52481e-15	90.48
2	AGAP000721	0	V-type H+-transporting ATPase subunit AC39 [Source:VB Community Annotation]	TRP	1.04633e-10	90.48
2	AGAP000733	0	UV excision repair protein RAD23 [Source:VB Community Annotation]	D	2.09903e-09	85.71
2	AGAP000739	RpS10	40S ribosomal protein S10 [Source:VB Community Annotation]	RTT	7.95878e-65	100
2	AGAP000752	0	acyl-CoA-binding domain-containing protein 6 [Source:VB Community Annotation]	M	1.47901e-10	95.24
2	AGAP000757	0	peptide-O-fucosyltransferase [Source:VB Community Annotation]	D	2.10779e-20	80.95
2	AGAP000790	0	Calycin-like	U	2.79847e-101	100
2	AGAP000804	GPXH2	glutathione peroxidase 2 [Source:VB Community Annotation]	REDOX/STRESS/MIT	1.84411e-59	100
2	AGAP000807	0	helix-loop-helix transcription factor [Source:VB Community Annotation]	RTT	1.07677e-34	100
2	AGAP000808	0	DNA damage-regulated autophagy modulator protein 2 [Source:VB Community Annotation]	D	4.27919e-40	100
2	AGAP000815	INTB	integrin beta subunit [Source:VB Community Annotation]	CS	8.47345e-17	90.48
2	AGAP000832	0	Derlin-2/3 [Source:VB Community Annotation]	D	5.33814e-44	100
2	AGAP000849	0	NADH dehydrogenase (ubiquinone) 1 beta subcomplex 1 [Source:VB Community Annotation]	REDOX/STRESS/MIT	1.17456e-11	100
2	AGAP000851	0	cytochrome c oxidase subunit 6a%2C mitochrondrial [Source:VB Community Annotation]	REDOX/STRESS/MIT	1.26606e-15	100
2	AGAP000852	0	Small ubiquitin-related modifier [Source:UniProtKB/TrEMBL%3BAcc:Q7PNJ2]	D	8.62799e-34	100
2	AGAP000862	0	alpha 1%2C3-glucosidase [Source:VB Community Annotation]	M	1.21579e-36	100
2	AGAP000868	0	beta-1%2C4-mannosyltransferase egghead protein [Source:VB Community Annotation]	M	9.5019e-09	90.48
2	AGAP000883	0	elongation factor 1-gamma [Source:VB Community Annotation]	RTT	1.85049e-39	100
2	AGAP000889	0	Coactosin-like protein [Source:VB Community Annotation]	CS	1.46672e-40	95.24
2	AGAP000897	0	coiled-coil-helix-coiled-coil-helix domain-containing protein 2%2C mitochondrial [Source:VB Community Annotation]	U	1.85184e-30	100
2	AGAP000900	0	protein-tyrosine sulfotransferase [Source:VB Community Annotation]	D	0.00124465	80.95
2	AGAP000909	0	endoplasmic reticulum resident protein 44 precursor [Source:VB Community Annotation]	TRP	5.96908e-26	90.48
2	AGAP000911	0	osteoclast differentiation	U	2.1338e-14	85.71
2	AGAP000927	0	myosin regulatory light chain%2C invertebrate [Source:VB Community Annotation]	CS	1.3042e-47	100
2	AGAP000935	0	mitochondrial processing peptidase [Source:VB Community Annotation]	REDOX/STRESS/MIT	8.10046e-10	95.24
2	AGAP000941	0	Molecular chaperone (small heat shock protein) [Posttranslational modification	D	0.00119528	85.71
2	AGAP000943	0	chloride intracellular channel [Source:VB Community Annotation]	TRP	3.35983e-12	90.48
2	AGAP000947	GSTU1	glutathione S-transferase unclassified 1 [Source:VB Community Annotation]	REDOX/STRESS/MIT	2.00467e-12	85.71
2	AGAP000948	0	Protein YIPF [Source:UniProtKB/TrEMBL%3BAcc:A0NBS3]	U	1.93995e-29	95.24
2	AGAP000949	0	transmembrane emp24 domain-containing protein 3 precursor [Source:VB Community Annotation]	TRP	8.12757e-20	90.48
2	AGAP000952	RpL37	60S ribosomal protein L37 [Source:VB Community Annotation]	RTT	2.3507e-69	100
2	AGAP000953	RpL10-1	60S ribosomal protein L10-1 [Source:VB Community Annotation]	RTT	1.83962e-76	100
2	AGAP000964	0	3TM protein	U	9.43783e-45	100
2	AGAP000969	0	tropomodulin [Source:VB Community Annotation]	D	3.12272e-06	80.95
2	AGAP000971	0	prolyl 4-hydroxylase [Source:VB Community Annotation]	M	1.12426e-26	90.48
2	AGAP000975	0	Angiotensin II, type I receptor-associated	D	1.27466e-05	80.95
2	AGAP000994	0	lysosomal Pro-X carboxypeptidase [Source:VB Community Annotation]	PROT	3.99118e-24	85.71
2	AGAP001032	0	Interferon-related developmental regulator 1 [Source:VB Community Annotation]	D	3.7773e-14	80.95
2	AGAP001064	0	Transmembrane emp24 domain-containing protein 10 precursor [Source:VB Community Annotation]	TRP	3.34076e-43	100
2	AGAP001069	0	SURF-4	TRP	2.95522e-32	100
2	AGAP001082	0	saposin [Source:VB Community Annotation]	D	2.10264e-29	100
2	AGAP001093	0	fos-like antigen%2C invertebrate [Source:VB Community Annotation]	U	0.000172068	80.95
2	AGAP001138	0	F-type H+-transporting ATPase subunit b [Source:VB Community Annotation]	TRP	1.58543e-28	100
2	AGAP001148	0	SH3 domain	D	1.17553e-08	80.95
2	AGAP001151	0	14-3-3 protein epsilon [Source:VB Community Annotation]	D	4.37199e-31	100
2	AGAP001174	0	14.5 kDa salivary peptide [Source:VB Community Annotation]	U	3.9613e-32	85.71
2	AGAP001218	0	tubulin alpha-4A chain [Source:VB Community Annotation]	CS	1.23505e-21	90.48
2	AGAP001219	TUB4A	tubulin alpha-4A chain [Source:VB Community Annotation]	CS	4.42213e-22	90.48
2	AGAP001229	0	dynein light chain Tctex-type 1 [Source:VB Community Annotation]	CS	6.05965e-08	80.95
2	AGAP001255	0	Unknown	U	1.94048e-10	85.71
2	AGAP001256	0	3'-phosphoadenosine 5'-phosphosulfate synthase [Source:VB Community Annotation]	D	2.14869e-54	100
2	AGAP001264	0	Plasma glutamate carboxypeptidase [Source:VB Community Annotation]	PROT	2.16858e-38	95.24
2	AGAP001267	0	Adaptor-related protein complex 2%2C beta 1 subunit [Source:VB Community Annotation]	D	2.40196e-29	95.24
2	AGAP001271	0	pre-mRNA cleavage complex 2 protein Pcf11 [Source:VB Community Annotation]	RTT	1.79027e-09	80.95
2	AGAP001274	RpS15	40S ribosomal protein S15 [Source:VB Community Annotation]	RTT	8.35999e-61	100
2	AGAP001279	0	protein phosphatase 3%2C catalytic subunit [Source:VB Community Annotation]	D	5.27253e-07	80.95
2	AGAP001285	0	charged multivesicular body protein 2A [Source:VB Community Annotation]	U	3.19602e-15	85.71
2	AGAP001299	0	mannose-1-phosphate guanylyltransferase [Source:VB Community Annotation]	M	6.66378e-22	85.71
2	AGAP001306	0	actin related protein 2/3 complex%2C subunit 4 [Source:VB Community Annotation]	CS	1.80218e-08	85.71
2	AGAP001312	0	succinyl-CoA synthetase alpha subunit [Source:VB Community Annotation]	D	2.18908e-14	100
2	AGAP001313	0	Muscular protein 20 [Source:VB Community Annotation]	CS	2.05168e-17	80.95
2	AGAP001321	0	biliverdin IX beta reductase (BVR-B); NADP(H) binding	D	1.77014e-19	90.48
2	AGAP001325	0	peroxiredoxin 5%2C atypical 2-Cys peroxiredoxin [Source:VB Community Annotation]	REDOX/STRESS/MIT	1.74748e-10	85.71
2	AGAP001335	0	dynein light chain LC8-type [Source:VB Community Annotation]	CS	1.04795e-24	85.71
2	AGAP001341	0	bleomycin hydrolase [Source:VB Community Annotation]	M	2.11905e-13	85.71
2	AGAP001364	0	Ubiquitin-fold modifier 1 [Source:UniProtKB/Swiss-Prot%3BAcc:Q7PXE2]	D	1.04745e-05	90.48
2	AGAP001367	0	beta-1%2C3-glucuronyltransferase [Source:VB Community Annotation]	M	6.23108e-13	95.24
2	AGAP001372	0	MAP Jupiter	U	1.13463e-16	100
2	AGAP001380	0	translation initiation factor 6 [Source:VB Community Annotation]	RTT	7.11251e-17	80.95
2	AGAP001381	0	laminin%2C beta 1 [Source:VB Community Annotation]	CS	1.42948e-87	100
2	AGAP001387	0	Unknown	U	3.18308e-08	100
2	AGAP001394	0	synaptosomal-associated protein%2C 23kDa [Source:VB Community Annotation]	TRP	2.24186e-07	80.95
2	AGAP001408	RpL35	60S ribosomal protein L35 [Source:VB Community Annotation]	RTT	3.95323e-50	100
2	AGAP001419	0	RNA recognition motif domain	RTT	7.24761e-11	95.24
2	AGAP001423	0	Bifunctional purine biosynthesis protein [Source:VB Community Annotation]	M	2.22448e-14	80.95
2	AGAP001424	0	heat shock protein 90kDa beta [Source:VB Community Annotation]	REDOX/STRESS/MIT	7.1067e-53	100
2	AGAP001438	0	Friend of PRMT1 duplication	U	1.57623e-16	80.95
2	AGAP001440	0	Proteasome 26S non-ATPase subunit 11 [Source:VB Community Annotation]	D	2.08805e-27	95.24
2	AGAP001447	0	solute carrier family 35 (UDP-galactose transporter)%2C member B1 [Source:VB Community Annotation]	TRP	1.35119e-50	100
2	AGAP001459	RpL17	60S ribosomal protein L17 [Source:UniProtKB/Swiss-Prot%3BAcc:A0NGY0]	RTT	1.01113e-66	100
2	AGAP001470	0	Phosphoinositide-dependent kinase 1	U	5.97148e-86	100
2	AGAP001502	0	mitochondrial 10 kDa heat shock protein [Source:VB Community Annotation]	REDOX/STRESS/MIT	2.13098e-40	100
2	AGAP001545	0	ribosomal biogenesis protein RLP24 [Source:VB Community Annotation]	RTT	1.81037e-07	95.24
2	AGAP001548	0	Stress-associated endoplasmic reticulum protein 2 [Source:VB Community Annotation]	U	1.06088e-20	100
2	AGAP001582	0	painless/TRPA Channel	CS	2.20416e-07	80.95
2	AGAP001595	RpS29	40S ribosomal protein S29 [Source:VB Community Annotation]	RTT	1.29133e-22	100
2	AGAP001616	0	Unknown	U	8.02591e-12	85.71
2	AGAP001617	0	Ras-related protein Rab-7A [Source:VB Community Annotation]	D	1.7969e-08	90.48
2	AGAP001645	0	RNA-binding protein FUS [Source:VB Community Annotation]	RTT	1.3885e-11	80.95
2	AGAP001648	CLIPB17	CLIP-domain serine protease [Source:VB Community Annotation]	I	1.14702e-55	100
2	AGAP001662	0	ADAM-TS Spacer 1	U	1.71792e-51	100
2	AGAP001697	0	20S proteasome subunit beta 3 [Source:VB Community Annotation]	D	1.41709e-11	85.71
2	AGAP001701	0	Small ubiquitin-related modifier [Source:UniProtKB/TrEMBL%3BAcc:Q7PY16]	D	7.25098e-26	100
2	AGAP001703	0	AP-2 complex subunit sigma [Source:VB Community Annotation]	TRP	2.37276e-17	100
2	AGAP001711	0	NADH dehydrogenase (ubiquinone) Fe-S protein 8 [Source:VB Community Annotation]	REDOX/STRESS/MIT	1.30055e-15	90.48
2	AGAP001712	0	actin related protein 2/3 complex%2C subunit 3 [Source:VB Community Annotation]	CS	8.20294e-18	95.24
2	AGAP001718	0	Unknown	U	1.16299e-70	100
2	AGAP001721	0	translocon-associated protein subunit alpha [Source:VB Community Annotation]	D	5.84382e-44	95.24
2	AGAP001730	0	cyclin G2 [Source:VB Community Annotation]	D	2.11724e-09	100
2	AGAP001734	0	nicastrin [Source:VB Community Annotation]	D	3.72438e-18	80.95
2	AGAP001745	0	26S proteasome regulatory subunit RPN2 [Source:VB Community Annotation]	D	9.37715e-49	85.71
2	AGAP001749	0	Stromal cell-derived factor 2 [Source:VB Community Annotation]	D	1.47684e-47	95.24
2	AGAP001759	0	protein transport protein SEC23 [Source:VB Community Annotation]	TRP	3.13213e-19	95.24
2	AGAP001761	0	ceramide synthetase [Source:VB Community Annotation]	D	2.54788e-20	90.48
2	AGAP001797	0	Tropomyosin 1 [Source:VB Community Annotation]	CS	2.50611e-15	100
2	AGAP001805	RpL13	60S ribosomal protein L13 [Source:UniProtKB/TrEMBL%3BAcc:Q7PUQ7]	RTT	3.05669e-59	100
2	AGAP001813	0	Histone H3 [Source:UniProtKB/TrEMBL%3BAcc:Q7PUQ8]	RTT	5.55889e-39	100
2	AGAP001827	0	hypoxia up-regulated 1 [Source:VB Community Annotation]	D	3.53125e-44	100
2	AGAP001873	0	Unknown	U	1.56079e-07	80.95
2	AGAP001874	0	Ras-related protein Rap-1A [Source:VB Community Annotation]	D	4.88092e-25	100
2	AGAP001903	Mdh2	NAD-dependent malate dehydrogenase [Source:VB Community Annotation]	M	8.91375e-22	100
2	AGAP001910	RpS3	40S ribosomal protein S3 [Source:VB Community Annotation]	RTT	1.0737e-58	100
2	AGAP001911	RpL6	60S ribosomal protein L6 [Source:VB Community Annotation]	RTT	1.98862e-78	100
2	AGAP001919	0	protein disulfide-isomerase A6 [Source:VB Community Annotation]	D	9.09136e-71	95.24
2	AGAP001928	0	nucleosome assembly protein 1-like 1 [Source:VB Community Annotation]	D	3.83944e-36	95.24
2	AGAP001930	0	heterogeneous nuclear ribonucleoprotein 27C [Source:VB Community Annotation]	RTT	2.64381e-29	100
2	AGAP001957	0	phosphatidylinositol transfer protein%2C beta [Source:VB Community Annotation]	TRP	8.82666e-08	90.48
2	AGAP001971	0	Polyubiquitin-C [Source:VB Community Annotation]	D	1.17448e-39	100
2	AGAP001995	Prosalpha2	26S proteasome alpha 2 subunit [Source:VB Community Annotation]	D	1.01968e-20	95.24
2	AGAP002016	0	iron/zinc purple acid phosphatase-like protein precursor [Source:VB Community Annotation]	M	1.6899e-16	80.95
2	AGAP002032	0	hypothetical protein, possible vitellogenin	TRP	2.44058e-41	90.48
2	AGAP002061	0	26S proteasome regulatory subunit N7 [Source:VB Community Annotation]	D	1.57407e-29	85.71
2	AGAP002063	0	nucleolar protein 56 [Source:VB Community Annotation]	D	4.12938e-39	100
2	AGAP002076	0	heat shock 70kDa protein 1/8 [Source:VB Community Annotation]	REDOX/STRESS/MIT	1.12553e-91	100
2	AGAP002101	0	isoleucyl-tRNA synthetase [Source:VB Community Annotation]	M	1.96709e-15	85.71
2	AGAP002107	0	calcyclin binding protein [Source:VB Community Annotation]	D	8.66365e-14	90.48
2	AGAP002109	0	solute carrier family 31 (copper transporter)%2C member 1 [Source:VB Community Annotation]	TRP	0.000139427	85.71
2	AGAP002122	RpL32	60S ribosomal protein L32 [Source:VB Community Annotation]	RTT	5.63892e-58	100
2	AGAP002130	0	tubulin-specific chaperone A [Source:VB Community Annotation]	U	1.07266e-12	80.95
2	AGAP002131	0	Unknown	U	2.68643e-24	85.71
2	AGAP002170	0	NADH dehydrogenase (ubiquinone) flavoprotein 2 [Source:VB Community Annotation]	REDOX/STRESS/MIT	5.03728e-25	90.48
2	AGAP002171	0	nucleolar protein 58 [Source:VB Community Annotation]	D	5.53658e-16	85.71
2	AGAP002175	0	Yip1 interacting factor homolog B [Source:VB Community Annotation]	U	3.86946e-11	80.95
2	AGAP002182	ABCE1	ATP-binding cassette transporter (ABC transporter) family E member 1 [Source:VB Community Annotation]	TRP	1.07495e-19	95.24
2	AGAP002186	0	very low-density lipoprotein receptor [Source:VB Community Annotation]	TRP	2.35725e-08	95.24
2	AGAP002245	0	cytochrome b-c1 complex subunit 6%2C mitochondrial [Source:VB Community Annotation]	REDOX/STRESS/MIT	0.00106714	85.71
2	AGAP002265	0	splicing factor%2C arginine/serine-rich 12 [Source:VB Community Annotation]	RTT	3.31069e-30	95.24
2	AGAP002277	0	mitochondrial import inner membrane translocase subunit Tim13 [Source:VB Community Annotation]	REDOX/STRESS/MIT	3.4319e-13	100
2	AGAP002306	RpL4	60S ribosomal protein L4 [Source:VB Community Annotation]	RTT	2.81988e-75	100
2	AGAP002337	eIF3d	Eukaryotic translation initiation factor 3 subunit D [Source:UniProtKB/Swiss-Prot%3BAcc:Q7QBW3]	RTT	3.41293e-50	100
2	AGAP002338	0	vacuolar protein sorting 29 homolog [Source:VB Community Annotation]	TRP	3.2057e-41	100
2	AGAP002340	eIF3a	Eukaryotic translation initiation factor 3 subunit A [Source:UniProtKB/Swiss-Prot%3BAcc:Q7PGE8]	RTT	3.02596e-30	80.95
2	AGAP002346	RpS14-2	40S ribosomal protein S14b [Source:UniProtKB/Swiss-Prot%3BAcc:Q7QBX2]	RTT	2.63832e-43	100
2	AGAP002352	0	p53	D	7.35871e-06	85.71
2	AGAP002357	0	vesicle transport protein GOT1B [Source:VB Community Annotation]	TRP	9.68304e-34	90.48
2	AGAP002395	RpL10-2	60S ribosomal protein L10-2 [Source:VB Community Annotation]	RTT	8.76531e-79	100
2	AGAP002396	0	dolichyl-diphosphooligosaccharide--protein glycosyltransferase [Source:VB Community Annotation]	M	9.1454e-59	100
2	AGAP002401	0	V-type H+-transporting ATPase subunit E [Source:VB Community Annotation]	TRP	1.16281e-22	95.24
2	AGAP002413	0	Basic leucine zipper and W2 domain-containing protein 1 [Source:VB Community Annotation]	RTT	4.1136e-36	100
2	AGAP002415	0	Rho GTPase activation protein	D	4.74465e-14	85.71
2	AGAP002422	CLIPD1	CLIP-domain serine protease [Source:VB Community Annotation]	I	8.8327e-79	100
2	AGAP002437	RpS8	40S ribosomal protein S8 [Source:UniProtKB/TrEMBL%3BAcc:Q7QC42]	RTT	1.76232e-73	100
2	AGAP002440	Cdc42	cell division cycle Cdc42 homolog [Source:VB Community Annotation]	D	1.04495e-13	95.24
2	AGAP002464	0	secreted ferritin G subunit [Source:VB Community Annotation]	D	2.90884e-68	100
2	AGAP002465	0	ferritin heavy chain [Source:VB Community Annotation]	D	1.78226e-63	100
2	AGAP002468	RpL26	60S ribosomal protein L26 [Source:VB Community Annotation]	RTT	2.77984e-95	100
2	AGAP002473	VATF	V-type proton ATPase subunit F [Source:UniProtKB/Swiss-Prot%3BAcc:Q17029]	TRP	1.83435e-08	95.24
2	AGAP002481	0	26S proteasome regulatory subunit N1 [Source:VB Community Annotation]	D	1.02634e-10	80.95
2	AGAP002499	0	methylmalonate-semialdehyde dehydrogenase (acylating)%2C mitochondrial [Source:VB Community Annotation]	M	2.2983e-08	80.95
2	AGAP002501	0	serine/threonine-protein phosphatase 4 regulatory subunit 2 [Source:VB Community Annotation]	U	2.11584e-09	85.71
2	AGAP002504	0	tRNA (cytosine34-C5)-methyltransferase [Source:VB Community Annotation]	RTT	6.60916e-19	85.71
2	AGAP002525	0	eukaryotic translation initiation factor 2A [Source:VB Community Annotation]	RTT	1.62039e-31	100
2	AGAP002534	0	dihydropteridine reductase [Source:VB Community Annotation]	M	2.72745e-17	85.71
2	AGAP002549	0	nicalin homolog [Source:VB Community Annotation]	D	1.03144e-26	90.48
2	AGAP002564	Aldo	fructose biphosphate aldolase [Source:VB Community Annotation]	M	6.3303e-05	85.71
2	AGAP002568	0	Nat13 protein [Source:VB Community Annotation]	D	1.46502e-22	80.95
2	AGAP002569	0	serine incorporator 1 [Source:VB Community Annotation]	D	5.38462e-15	80.95
2	AGAP002594	0	apolipoprotein D [Source:VB Community Annotation]	D	4.41918e-119	100
2	AGAP002599	0	polyubiquitin [Source:VB Community Annotation]	D	1.23133e-72	100
2	AGAP002606	0	26S proteasome regulatory subunit N12 [Source:VB Community Annotation]	D	6.02545e-14	80.95
2	AGAP002627	0	S-formylglutathione hydrolase [Source:UniProtKB/TrEMBL%3BAcc:Q7QCH6]	REDOX/STRESS/MIT	1.06441e-22	80.95
2	AGAP002645	0	septin 2 [Source:VB Community Annotation]	CS	9.45777e-24	95.24
2	AGAP002655	0	putative splicing regulator	RTT	7.24772e-17	95.24
2	AGAP002658	0	small nuclear ribonucleoprotein polypeptide F [Source:VB Community Annotation]	RTT	6.39055e-07	80.95
2	AGAP002667	Tctp	Translationally-controlled tumor protein homolog [Source:UniProtKB/Swiss-Prot%3BAcc:Q7QCK2]	RTT	4.67547e-42	100
2	AGAP002693	ABCF1	ATP-binding cassette transporter (ABC transporter) family F member 1 [Source:VB Community Annotation]	TRP	5.25043e-16	100
2	AGAP002706	0	small nuclear ribonucleoprotein G [Source:VB Community Annotation]	RTT	6.80257e-05	85.71
2	AGAP002713	mRpL49	39S ribosomal protein L49%2C mitochondrial [Source:VB Community Annotation]	RTT	6.33036e-06	80.95
2	AGAP002728	0	Isocitrate dehydrogenase [NAD] subunit%2C mitochondrial [Source:UniProtKB/TrEMBL%3BAcc:F5HKN6]	M	0.000157117	85.71
2	AGAP002752	0	DnaJ (Hsp40) homolog%2C subfamily C%2C member 3 [Source:VB Community Annotation]	REDOX/STRESS/MIT	1.8839e-38	80.95
2	AGAP002754	RpL35a	60S ribosomal protein L35a [Source:VB Community Annotation]	RTT	1.42953e-59	100
2	AGAP002759	0	T-complex protein 1 subunit gamma [Source:UniProtKB/TrEMBL%3BAcc:Q7QCQ5]	D	5.73021e-63	100
2	AGAP002762	0	T-complex protein 1 subunit eta [Source:VB Community Annotation]	D	7.52944e-45	100
2	AGAP002779	0	transcription initiation factor TFIIF subunit alpha [Source:VB Community Annotation]	RTT	0.00173788	85.71
2	AGAP002788	0	MICOS complex subunit [Source:UniProtKB/TrEMBL%3BAcc:Q7QCS7]	U	0.00037779	90.48
2	AGAP002858	0	Sodium/potassium-transporting ATPase subunit alpha [Source:UniProtKB/TrEMBL%3BAcc:F5HKJ1]	TRP	5.16498e-25	100
2	AGAP002878	0	Cystatin-like protein [Source:VB Community Annotation]	D	1.38623e-20	100
2	AGAP002879	0	cathepsin F [Source:VB Community Annotation]	PROT	1.86766e-32	95.24
2	AGAP002883	0	Oxoglutarate/iron-dependent dioxygenase	D	3.82117e-08	85.71
2	AGAP002884	0	V-type H+-transporting ATPase subunit B [Source:VB Community Annotation]	TRP	2.61735e-09	85.71
2	AGAP002896	0	RNA-binding protein Nova [Source:VB Community Annotation]	RTT	0.00136847	80.95
2	AGAP002919	RpS6	40S ribosomal protein S6 [Source:VB Community Annotation]	RTT	2.35348e-67	100
2	AGAP002921	RpL36	60S ribosomal protein L36 [Source:UniProtKB/TrEMBL%3BAcc:Q7PQY8]	RTT	1.26838e-69	100
2	AGAP002924	0	Protein tweety homolog [Source:UniProtKB/TrEMBL%3BAcc:F5HKF1]	U	8.69699e-22	100
2	AGAP002931	Arf2	ADP-ribosylation factor 2 [Source:VB Community Annotation]	D	8.94711e-24	100
2	AGAP002935	eIF3f	Eukaryotic translation initiation factor 3 subunit F [Source:UniProtKB/Swiss-Prot%3BAcc:Q7QD36]	RTT	1.7137e-32	100
2	AGAP002956	0	splicing factor U2AF 35 kDa subunit [Source:VB Community Annotation]	RTT	3.93434e-05	85.71
2	AGAP002969	0	asparaginyl-tRNA synthetase [Source:VB Community Annotation]	D	2.94834e-30	95.24
2	AGAP003002	0	AdoMet-dependent rRNA methyltransferase [Source:VB Community Annotation]	RTT	2.24198e-51	85.71
2	AGAP003008	0	26S proteasome regulatory subunit T3 [Source:VB Community Annotation]	D	2.15564e-20	90.48
2	AGAP003016	0	mesencephalic astrocyte-derived neurotrophic factor homolog [Source:VB Community Annotation]	D	6.49059e-61	100
2	AGAP003017	0	serine/threonine-protein phosphatase 6 catalytic subunit [Source:VB Community Annotation]	D	5.28924e-24	80.95
2	AGAP003018	0	dynamin GTPase [Source:VB Community Annotation]	D	0.000474762	80.95
2	AGAP003021	0	Clathrin heavy chain [Source:UniProtKB/TrEMBL%3BAcc:Q7PQY9]	TRP	3.77822e-24	100
2	AGAP003025	RpLp2	60S ribosomal protein LP2 [Source:VB Community Annotation]	RTT	8.42625e-53	100
2	AGAP003028	0	Ras-related protein Rab-35 [Source:VB Community Annotation]	D	5.66187e-06	80.95
2	AGAP003043	0	Chromosome segregation ATPases [Cell division and chromosome partitioning]	U	1.30562e-19	85.71
2	AGAP003047	0	ATP-dependent RNA helicase [Source:VB Community Annotation]	RTT	1.01513e-20	95.24
2	AGAP003048	0	ribosome production factor 2 [Source:VB Community Annotation]	RTT	4.25692e-06	85.71
2	AGAP003052	0	small glutamine-rich tetratricopeptide repeat-containing protein alpha [Source:VB Community Annotation]	M	2.95755e-31	90.48
2	AGAP003057	CLIPB8	CLIP-domain serine protease [Source:VB Community Annotation]	I	1.52556e-28	80.95
2	AGAP003069	0	signal peptidase%2C endoplasmic reticulum-type [Source:VB Community Annotation]	D	6.8488e-78	100
2	AGAP003088	0	TMEM192 family	U	1.32753e-29	95.24
2	AGAP003089	0	ATP-dependent RNA helicase [Source:VB Community Annotation]	RTT	1.34388e-19	90.48
2	AGAP003119	0	translation initiation factor 1A [Source:VB Community Annotation]	RTT	2.81695e-37	100
2	AGAP003126	0	Unknown	U	3.78682e-10	90.48
2	AGAP003134	0	FK506-binding protein 2 [Source:VB Community Annotation]	U	5.64646e-06	80.95
2	AGAP003154	0	Transcription elongation factor B polypeptide 2 [Source:VB Community Annotation]	RTT	1.69211e-24	90.48
2	AGAP003155	0	UPF0483 protein AGAP003155 [Source:VB Community Annotation]	U	1.51526e-09	85.71
2	AGAP003178	GRX2	glutaredoxin [Source:VB Community Annotation]	REDOX/STRESS/MIT	1.69992e-14	100
2	AGAP003183	0	protein transport protein SEC13 [Source:VB Community Annotation]	TRP	4.50749e-22	100
2	AGAP003216	0	26S proteasome regulatory subunit T2 [Source:VB Community Annotation]	D	2.14736e-16	85.71
2	AGAP003220	0	CHK kinase-like	D	1.83658e-17	95.24
2	AGAP003228	0	histone acetyltransferase type B subunit 2 [Source:VB Community Annotation]	RTT	1.38119e-28	85.71
2	AGAP003277	0	cathepsin D [Source:VB Community Annotation]	PROT	1.48995e-32	95.24
2	AGAP003300	0	solute carrier family 39 (zinc transporter) [Source:VB Community Annotation]	TRP	1.02261e-11	85.71
2	AGAP003304	0	CREG/Cellular Repressor of E1A- and JH-stimulated Genes	U	1.63429e-36	100
2	AGAP003325	0	NADH dehydrogenase (ubiquinone) 1 alpha subcomplex 4 [Source:VB Community Annotation]	REDOX/STRESS/MIT	1.1999e-30	100
2	AGAP003372	0	Haloacid dehalogenase-like hydrolase domain-containing protein 1A [Source:VB Community Annotation]	M	1.1169e-11	95.24
2	AGAP003397	0	Similar to ATP-dependent RNA helicase dbp5 [Source:VB Community Annotation]	RTT	5.78653e-30	80.95
2	AGAP003398	0	nucleosome-remodeling factor 38 kDa subunit [Source:VB Community Annotation]	D	8.36872e-06	95.24
2	AGAP003408	0	aldose reductase [Source:VB Community Annotation]	REDOX/STRESS/MIT	7.21851e-12	85.71
2	AGAP003412	RpS28	40S ribosomal protein S28 [Source:VB Community Annotation]	RTT	4.67418e-22	100
2	AGAP003430	VhaM8.9	vacuolar H+ ATPase M8.9 accessory subunit [Source:VB Community Annotation]	TRP	6.12446e-40	95.24
2	AGAP003439	0	Zinc finger, FLYWCH-type	D	0.000737949	95.24
2	AGAP003462	0	protein arginine N-methyltransferase 1 [Source:VB Community Annotation]	D	8.42297e-44	95.24
2	AGAP003475	0	leucyl aminopeptidase [Source:VB Community Annotation]	PROT	1.24732e-14	95.24
2	AGAP003477	0	T-complex protein 1 subunit zeta [Source:VB Community Annotation]	D	6.87579e-38	100
2	AGAP003519	0	ankyrin repeat domain-containing protein 17 [Source:VB Community Annotation]	D	1.35969e-07	90.48
2	AGAP003532	RpS3a	40S ribosomal protein S3a [Source:UniProtKB/Swiss-Prot%3BAcc:P52813]	RTT	1.66132e-86	100
2	AGAP003533	0	DnaJ homolog subfamily C member 19 [Source:VB Community Annotation]	REDOX/STRESS/MIT	0.00128265	80.95
2	AGAP003538	RpL36a	60S ribosomal protein L36a [Source:VB Community Annotation]	RTT	6.25745e-55	100
2	AGAP003549	0	Tango 9	D	6.33911e-13	85.71
2	AGAP003553	0	Transmembrane emp24 protein transport domain containing 9 [Source:VB Community Annotation]	D	8.73173e-24	95.24
2	AGAP003556	RpL3	60S ribosomal protein L3 [Source:VB Community Annotation]	RTT	5.79483e-53	100
2	AGAP003560	0	UDP-glucose:glycoprotein glucosyltransferase [Source:VB Community Annotation]	M	3.79739e-36	95.24
2	AGAP003588	VATH	V-type H+-transporting ATPase subunit H [Source:VB Community Annotation]	TRP	2.01027e-05	90.48
2	AGAP003592	RpLP0	60S ribosomal protein LP0 [Source:VB Community Annotation]	RTT	8.1918e-68	100
2	AGAP003597	0	histone-lysine N-methyltransferase SUV39H [Source:VB Community Annotation]	RTT	1.93971e-13	100
2	AGAP003599	0	F-type H+-transporting ATPase oligomycin sensitivity conferral protein [Source:VB Community Annotation]	TRP	1.08381e-36	100
2	AGAP003612	0	Protein CDV3	U	7.30243e-13	90.48
2	AGAP003614	0	DUF788, TMEM208	U	9.52917e-29	95.24
2	AGAP003652	0	aldehyde dehydrogenase (NAD+) [Source:VB Community Annotation]	M	1.99097e-26	85.71
2	AGAP003662	0	Prenylated Rab acceptor protein 1 [Source:VB Community Annotation]	TRP	2.95679e-15	90.48
2	AGAP003663	0	ATP-dependent RNA helicase DBP2 [Source:VB Community Annotation]	RTT	4.52588e-15	95.24
2	AGAP003711	0	V-type H+-transporting ATPase subunit I [Source:VB Community Annotation]	TRP	5.70811e-27	100
2	AGAP003720	0	annexin A4 [Source:VB Community Annotation]	CS	2.21293e-24	80.95
2	AGAP003721	ANXB10B	annexin B10B [Source:VB Community Annotation]	CS	9.14353e-17	85.71
2	AGAP003722	ANXB10C	annexin B10C [Source:VB Community Annotation]	CS	1.53759e-11	80.95
2	AGAP003759	0	juvenile hormone-inducible protein [Source:VB Community Annotation]	D	6.24489e-06	80.95
2	AGAP003767	0	Ecdysteroid kinase	D	1.80087e-13	95.24
2	AGAP003768	RpS2	40S ribosomal protein S2 [Source:VB Community Annotation]	RTT	5.75646e-68	100
2	AGAP003769	0	importin beta-3 [Source:VB Community Annotation]	TRP	1.56226e-16	85.71
2	AGAP003770	mRpL51	39S ribosomal protein L51%2C mitochondrial [Source:VB Community Annotation]	RTT	5.30313e-05	80.95
2	AGAP003816	RpL30	60S ribosomal protein L30 [Source:VB Community Annotation]	RTT	9.22687e-37	100
2	AGAP003843	0	cytochrome c heme-lyase [Source:VB Community Annotation]	REDOX/STRESS/MIT	1.03805e-06	90.48
2	AGAP003857	0	ubiquitin-conjugating enzyme E2 A [Source:VB Community Annotation]	D	4.04088e-05	85.71
2	AGAP003864	0	Unknown	U	2.00231e-05	95.24
2	AGAP003869	0	cytosol aminopeptidase [Source:VB Community Annotation]	PROT	2.8181e-15	85.71
2	AGAP003878	0	LRR TM	U	9.955e-44	100
2	AGAP003879	VhaAC45	vacuolar H+ ATPase AC45 accessory subunit [Source:VB Community Annotation]	TRP	1.21951e-34	90.48
2	AGAP003893	0	C-terminal-binding protein [Source:VB Community Annotation]	D	2.58405e-11	90.48
2	AGAP003898	0	Cartilage-associated protein	U	2.2499e-36	80.95
2	AGAP003904	0	AIF-like mitochondrial oxidoreductase (Nfrl) [Source:VB Community Annotation]	D	7.50636e-10	85.71
2	AGAP003935	Prosalpha1	26S proteasome alpha 1 subunit [Source:VB Community Annotation]	D	4.47022e-19	95.24
2	AGAP003968	0	UMP-CMP kinase [Source:UniProtKB/TrEMBL%3BAcc:Q7Q292]	D	1.11828e-50	95.24
2	AGAP003987	0	complement component 1 Q subcomponent-binding protein%2C mitochondrial [Source:VB Community Annotation]	REDOX/STRESS/MIT	4.60255e-22	90.48
2	AGAP004002	0	60 kDa heat shock protein%2C mitochondrial precursor [Source:VB Community Annotation]	D	9.69904e-23	90.48
2	AGAP004016	0	Leucine-rich repeats (LRRs)	U	3.23632e-72	100
2	AGAP004017	0	Leucine rich repeat (LRR)	I	5.77249e-93	100
2	AGAP004026	GPRMTH6	methuselah receptor 6 [Source:VB Community Annotation]	D	9.90226e-27	90.48
2	AGAP004031	0	mitochondrial electron transfer flavoprotein subunit alpha [Source:VB Community Annotation]	REDOX/STRESS/MIT	1.88345e-34	100
2	AGAP004055	0	2-oxoglutarate dehydrogenase E2 component (dihydrolipoamide succinyltransferas [Source:VB Community Annotation]	M	9.28426e-14	90.48
2	AGAP004078	0	DNA topoisomerase I [Source:VB Community Annotation]	RTT	4.36731e-06	90.48
2	AGAP004098	0	GTP-binding protein SAR1 [Source:VB Community Annotation]	D	2.09302e-33	95.24
2	AGAP004142	0	aspartate aminotransferase%2C cytoplasmic [Source:VB Community Annotation]	D	9.57766e-21	95.24
2	AGAP004146	0	Ras-related protein Rab-1A [Source:VB Community Annotation]	D	1.10983e-27	95.24
2	AGAP004151	0	protein phosphatase 5 [Source:VB Community Annotation]	D	4.09452e-12	90.48
2	AGAP004164	GSTD1-4	glutathione S-transferase delta class 1 [Source:VB Community Annotation]	REDOX/STRESS/MIT	2.51804e-41	100
2	AGAP004175	0	uridine monophosphate synthetase [Source:VB Community Annotation]	M	1.38755e-19	80.95
2	AGAP004192	0	heat shock 70kDa protein 5 [Source:VB Community Annotation]	REDOX/STRESS/MIT	1.35466e-84	100
2	AGAP004197	0	6-phosphogluconate dehydrogenase%2C decarboxylating [Source:UniProtKB/TrEMBL%3BAcc:Q7PQM3]	M	2.92403e-13	85.71
2	AGAP004210	0	7TM GPCR, serpentine receptor class h (Srh)	U	2.38561e-07	80.95
2	AGAP004212	Crc	calreticulin [Source:VB Community Annotation]	TRP	1.11898e-82	100
2	AGAP004214	0	HMGI/HMGY	U	5.30434e-22	85.71
2	AGAP004235	0	elongation factor 1-delta [Source:VB Community Annotation]	RTT	7.68025e-36	100
2	AGAP004238	0	T-complex protein 1 subunit alpha [Source:VB Community Annotation]	D	2.44037e-24	90.48
2	AGAP004247	GPXH1	glutathione peroxidase 1 [Source:VB Community Annotation]	REDOX/STRESS/MIT	4.90652e-15	95.24
2	AGAP004256	0	Zinc finger, LIM-type	D	1.04922e-12	95.24
2	AGAP004294	Ubqn	ubiquilin [Source:VB Community Annotation]	D	1.29994e-09	80.95
2	AGAP004296	0	signal peptidase complex subunit 1 [Source:VB Community Annotation]	D	5.09794e-24	100
2	AGAP004335	0	filamin [Source:VB Community Annotation]	CS	1.31064e-09	80.95
2	AGAP004349	0	K homology RNA-binding domain	U	3.06444e-52	100
2	AGAP004352	0	succinyl-CoA synthetase beta subunit [Source:VB Community Annotation]	M	7.79163e-14	80.95
2	AGAP004362	0	glutamate dehydrogenase (NAD(P)+) [Source:VB Community Annotation]	M	9.96163e-22	90.48
2	AGAP004372	0	elongation of very long chain fatty acids protein 1 [Source:VB Community Annotation]	M	4.09744e-33	80.95
2	AGAP004395	0	nucleophosmin 3 [Source:VB Community Annotation]	D	9.98161e-75	100
2	AGAP004400	0	CYTC oxidase, subunit 8	U	6.0041e-05	100
2	AGAP004407	0	lectin%2C mannose-binding 2 [Source:VB Community Annotation]	D	2.20133e-25	85.71
2	AGAP004422	RpL19	60S ribosomal protein L19 [Source:VB Community Annotation]	RTT	3.96955e-62	100
2	AGAP004431	0	Lysosomal transcription factor, NCU-G1	RTT	4.54577e-33	95.24
2	AGAP004443	0	glycogen synthase kinase 3 beta [Source:VB Community Annotation]	D	2.73035e-06	95.24
2	AGAP004462	RpS25	40S ribosomal protein S25 [Source:VB Community Annotation]	RTT	8.76502e-42	100
2	AGAP004484	0	CDGSH iron sulfur domain-containing protein 2 homolog [Source:VB Community Annotation]	D	5.08347e-36	90.48
2	AGAP004486	0	adiponectin receptor [Source:VB Community Annotation]	D	0.000489185	85.71
2	AGAP004492	0	upstream activation factor subunit UAF30 [Source:VB Community Annotation]	D	2.77094e-09	80.95
2	AGAP004519	0	sideroflexin 1%2C2%2C3 [Source:VB Community Annotation]	TRP	7.86044e-56	95.24
2	AGAP004528	0	N-acyltransferase	U	1.5191e-17	95.24
2	AGAP004533	0	cathepsin B [Source:VB Community Annotation]	PROT	5.46723e-45	100
2	AGAP004559	0	Ras-related protein [Source:VB Community Annotation]	D	4.2167e-39	100
2	AGAP004592	0	splicing factor%2C arginine/serine-rich 4/5/6 [Source:VB Community Annotation]	RTT	1.53442e-08	100
2	AGAP004593	0	EH domain-containing protein 1 [Source:VB Community Annotation]	TRP	1.1099e-17	95.24
2	AGAP004596	PyK	pyruvate kinase [Source:VB Community Annotation]	D	0.00018151	85.71
2	AGAP004609	0	protein kinase C substrate 80K-H [Source:VB Community Annotation]	D	3.90854e-08	80.95
2	AGAP004616	0	F-type H+-transporting ATPase subunit 6 [Source:VB Community Annotation]	TRP	0.000213128	100
2	AGAP004625	0	cortactin [Source:VB Community Annotation]	D	6.64704e-09	85.71
2	AGAP004626	0	actin binding	CS	7.57592e-05	80.95
2	AGAP004631	0	calcium ion binding	D	1.50473e-10	90.48
2	AGAP004653	0	electron transfer flavoprotein subunit beta%2C mitochondrial [Source:VB Community Annotation]	REDOX/STRESS/MIT	5.26448e-54	100
2	AGAP004672	0	no circadian temperature entrainment	U	5.64958e-07	80.95
2	AGAP004677	0	methylenetetrahydrofolate dehydrogenase(NAD+) / 5%2C10-methenyltetrahydrofolate [Source:VB Community Annotation]	M	0.000322886	80.95
2	AGAP004684	0	rRNA-processing protein CGR1 [Source:VB Community Annotation]	U	6.43548e-09	90.48
2	AGAP004703	0	DNA-directed RNA polymerase III subunit RPC1 [Source:VB Community Annotation]	RTT	3.81193e-09	85.71
2	AGAP004721	0	N-acetylglucosamine-6-sulfatase [Source:VB Community Annotation]	M	3.6966e-05	100
2	AGAP004739	0	H/ACA ribonucleoprotein complex subunit 4 [Source:VB Community Annotation]	D	4.26125e-49	100
2	AGAP004743	0	Transmembrane emp24 domain-containing protein [Source:VB Community Annotation]	D	3.81199e-37	100
2	AGAP004747	0	Uncharacterized protein C05D11.1 [Source:VB Community Annotation]	U	7.60496e-14	80.95
2	AGAP004750	0	translation initiation factor 4G [Source:VB Community Annotation]	RTT	2.38432e-11	95.24
2	AGAP004775	0	Xaa-Pro dipeptidase [Source:VB Community Annotation]	PROT	1.89155e-23	90.48
2	AGAP004778	0	Unknown	U	6.47963e-06	80.95
2	AGAP004798	0	Coatomer protein complex%2C subunit beta 2 [Source:VB Community Annotation]	TRP	3.26302e-21	100
2	AGAP004817	lig	Protein lingerer [Source:UniProtKB/Swiss-Prot%3BAcc:Q7PMS9]	D	3.06094e-08	90.48
2	AGAP004819	0	receptor expression-enhancing protein 5 [Source:VB Community Annotation]	D	3.1979e-24	100
2	AGAP004824	0	translation initiation factor 5B [Source:VB Community Annotation]	RTT	6.82012e-07	85.71
2	AGAP004852	0	Adducin [Source:VB Community Annotation]	D	0.000142356	90.48
2	AGAP004867	0	V-type H+-transporting ATPase subunit G [Source:VB Community Annotation]	TRP	4.56995e-21	85.71
2	AGAP004886	0	microtubule-associated protein%2C RP/EB family [Source:VB Community Annotation]	CS	8.14863e-15	95.24
2	AGAP004887	RpS17	40S ribosomal protein S17 [Source:UniProtKB/Swiss-Prot%3BAcc:Q9U9L1]	RTT	1.06582e-63	100
2	AGAP004890	0	ribose-phosphate pyrophosphokinase [Source:VB Community Annotation]	M	0.000330231	85.71
2	AGAP004904	CAT1	Catalase [Source:UniProtKB/TrEMBL%3BAcc:A3E7Z8]	I	0.000750955	80.95
2	AGAP004916	0	FREP11	I	3.47407e-23	80.95
2	AGAP004917	0	fibrinogen-related protein 1 [Source:VB Community Annotation]	I	2.67211e-55	95.24
2	AGAP004918	0	fibrinogen [Source:VB Community Annotation]	I	4.11291e-49	100
2	AGAP004919	RpL15	60S ribosomal protein L15 [Source:UniProtKB/Swiss-Prot%3BAcc:P52818]	RTT	1.18418e-64	100
2	AGAP004936	0	EGF repeats	D	3.87241e-54	100
2	AGAP004942	0	poly(rC)-binding protein 2/3/4 [Source:VB Community Annotation]	RTT	9.43498e-05	90.48
2	AGAP004944	0	heat shock 70kDa protein 1/8 [Source:VB Community Annotation]	REDOX/STRESS/MIT	2.26231e-17	100
2	AGAP004960	Prosalpha3	26S proteasome alpha 3 subunit [Source:VB Community Annotation]	D	4.40684e-12	85.71
2	AGAP004990	mbf1	multiprotein bridging factor 1 [Source:VB Community Annotation]	D	1.58571e-10	90.48
2	AGAP004991	0	20S proteasome subunit beta 6 [Source:VB Community Annotation]	D	1.20239e-18	85.71
2	AGAP004993	0	laminin subunit alpha [Source:VB Community Annotation]	CS	1.22642e-38	100
2	AGAP005032	0	calnexin [Source:VB Community Annotation]	D	1.12258e-12	80.95
2	AGAP005046	RpL22	60S ribosomal protein L22 [Source:VB Community Annotation]	RTT	3.4922e-56	100
2	AGAP005061	RpS9	40S ribosomal protein S9 [Source:VB Community Annotation]	RTT	2.25052e-45	100
2	AGAP005100	0	charged multivesicular body protein 5 [Source:VB Community Annotation]	U	1.69384e-19	80.95
2	AGAP005108	0	Proliferation-associated 2G4 [Source:VB Community Annotation]	M	1.83648e-45	95.24
2	AGAP005110	Actincytosk	Arp3	CS	3.65565e-32	100
2	AGAP005117	0	polyadenylate-binding protein 2 [Source:VB Community Annotation]	D	2.7483e-12	90.48
2	AGAP005122	0	UBX domain-containing protein 1 [Source:VB Community Annotation]	D	3.90246e-29	80.95
2	AGAP005129	0	5'-methylthioadenosine phosphorylase [Source:VB Community Annotation]	M	4.48629e-34	80.95
2	AGAP005131	RpS24	40S ribosomal protein S24 [Source:UniProtKB/TrEMBL%3BAcc:Q7PQ02]	RTT	4.36804e-64	100
2	AGAP005134	0	F-type H+-transporting ATPase subunit alpha [Source:VB Community Annotation]	TRP	7.43107e-72	100
2	AGAP005160	0	Ras homolog gene family%2C member A [Source:VB Community Annotation]	D	8.33959e-19	100
2	AGAP005175	0	acetyl-CoA carboxylase / biotin carboxylase [Source:VB Community Annotation]	M	0.000855729	80.95
2	AGAP005197	0	ubiquitin-conjugating enzyme E2 N [Source:VB Community Annotation]	D	5.13512e-18	90.48
2	AGAP005202	0	RING-box protein 1 [Source:VB Community Annotation]	D	5.81851e-15	100
2	AGAP005203	PGRPLC	peptidoglycan recognition protein (long) [Source:VB Community Annotation]	I	1.6484e-10	80.95
2	AGAP005246	SRPN10	serine protease inhibitor (serpin) 10 [Source:VB Community Annotation]	I	4.3586e-18	95.24
2	AGAP005293	0	beta-tubulin isotype I [Source:VB Community Annotation]	CS	1.04113e-25	80.95
2	AGAP005316	0	charged multivesicular body protein 4 [Source:VB Community Annotation]	U	2.23162e-12	80.95
2	AGAP005365	0	ribosome biogenesis protein BRX1 [Source:VB Community Annotation]	RTT	1.50777e-12	80.95
2	AGAP005369	0	SRP40	U	2.0314e-13	95.24
2	AGAP005376	0	Unknown	REDOX/STRESS/MIT	1.04071e-26	80.95
2	AGAP005380	0	UPF0220	U	5.75657e-13	95.24
2	AGAP005393	0	Ras-related protein Rab-2A [Source:VB Community Annotation]	D	1.64491e-17	95.24
2	AGAP005404	0	lectin%2C mannose-binding 1 [Source:VB Community Annotation]	D	4.4579e-21	85.71
2	AGAP005410	0	peptide alpha-N-acetyltransferase [Source:VB Community Annotation]	M	7.28841e-29	90.48
2	AGAP005423	Prosalpha4	26S proteasome alpha 4 subunit [Source:VB Community Annotation]	D	1.07045e-21	100
2	AGAP005427	RpL28	60S ribosomal protein L28 [Source:VB Community Annotation]	RTT	1.09122e-55	100
2	AGAP005432	0	programmed cell death protein 5 [Source:VB Community Annotation]	D	2.13754e-11	100
2	AGAP005445	0	Ras-related C3 botulinum toxin substrate [Source:VB Community Annotation]	D	6.95727e-14	90.48
2	AGAP005462	0	Thioredoxin-like	REDOX/STRESS/MIT	1.57271e-20	100
2	AGAP005467	0	vigilin [Source:VB Community Annotation]	U	7.90354e-19	95.24
2	AGAP005504	0	phospholipid scramblase 1 [Source:VB Community Annotation]	D	2.92002e-34	100
2	AGAP005523	0	small nuclear ribonucleoprotein B and B' [Source:VB Community Annotation]	RTT	1.08557e-08	85.71
2	AGAP005528	0	Bax inhibitor 1-related	D	1.43963e-28	100
2	AGAP005529	0	Transmembrane BAX inhibitor motif-containing protein 4 [Source:VB Community Annotation]	D	9.21073e-12	90.48
2	AGAP005558	0	peptidase (mitochondrial processing) beta [Source:VB Community Annotation]	REDOX/STRESS/MIT	2.49827e-42	100
2	AGAP005559	0	26S proteasome regulatory subunit N10 [Source:VB Community Annotation]	D	1.90143e-23	80.95
2	AGAP005569	0	casein kinase II subunit alpha [Source:VB Community Annotation]	D	4.18872e-14	85.71
2	AGAP005576	0	aspartyl-tRNA synthetase [Source:VB Community Annotation]	D	3.96983e-36	100
2	AGAP005602	0	zinc finger protein 706 [Source:VB Community Annotation]	D	1.29628e-06	80.95
2	AGAP005608	0	NUCB1	D	1.72043e-37	100
2	AGAP005611	0	Unknown	U	5.95852e-23	100
2	AGAP005618	0	1%2C2-dihydroxy-3-keto-5-methylthiopentene dioxygenase [Source:UniProtKB/TrEMBL%3BAcc:Q7Q6X6]	D	1.00014e-14	90.48
2	AGAP005625	SCRASP1	Class A Scavenger Receptor (SRCR domain) with Serine Protease domain. [Source:VB Community Annotation]	I	6.29826e-51	100
2	AGAP005630	0	transitional endoplasmic reticulum ATPase [Source:VB Community Annotation]	D	5.59206e-58	100
2	AGAP005652	0	ATP-dependent RNA helicase DDX5/DBP2 [Source:VB Community Annotation]	RTT	0.000387299	85.71
2	AGAP005672	0	staphylococcal nuclease domain-containing protein 1 [Source:VB Community Annotation]	D	5.13969e-22	95.24
2	AGAP005674	0	Miple [Source:VB Community Annotation]	U	0.000309566	80.95
2	AGAP005685	0	Learning associated protein 18-like	U	0.00120354	100
2	AGAP005723	0	adenine phosphoribosyltransferase [Source:VB Community Annotation]	D	1.02159e-09	85.71
2	AGAP005744	LRIM26	leucine-rich immune protein (Coil-less) [Source:VB Community Annotation]	I	1.35545e-25	85.71
2	AGAP005749	GSTO1	glutathione S-transferase omega class 1 [Source:VB Community Annotation]	REDOX/STRESS/MIT	4.13166e-32	85.71
2	AGAP005764	0	Oligosaccaryltransferase	M	3.92054e-11	95.24
2	AGAP005775	0	Bax inhibitor 1 [Source:VB Community Annotation]	D	2.16801e-36	100
2	AGAP005802	RpL8	60S ribosomal protein L8 [Source:UniProtKB/Swiss-Prot%3BAcc:Q9U9L2]	RTT	4.55043e-82	100
2	AGAP005813	0	FeS cluster assembly scaffold IscU [Source:VB Community Annotation]	M	1.28431e-07	90.48
2	AGAP005820	0	Unknown	U	9.33169e-38	95.24
2	AGAP005824	0	presqualene diphosphate phosphatase [Source:VB Community Annotation]	U	1.73885e-12	90.48
2	AGAP005849	0	colmedin [Source:VB Community Annotation]	CS	4.69758e-26	90.48
2	AGAP005861	0	Translocon-associated protein subunit beta [Source:UniProtKB/TrEMBL%3BAcc:Q5TRB4]	TRP	6.34712e-42	100
2	AGAP005865	0	fumarylacetoacetase [Source:VB Community Annotation]	M	6.495e-07	80.95
2	AGAP005873	0	DNA-directed RNA polymerases I%2C II%2C and III subunit RPABC2 [Source:VB Community Annotation]	RTT	2.08251e-08	90.48
2	AGAP005888	0	Unknown	I	7.29587e-23	85.71
2	AGAP005891	0	coronin homolog [Source:VB Community Annotation]	D	3.83749e-27	100
2	AGAP005913	0	guanine nucleotide-binding protein G(I)/G(S)/G(T) subunit beta-1 [Source:VB Community Annotation]	D	8.5058e-10	90.48
2	AGAP005914	SP11644	serine-type carboxypeptidase activity	PROT	8.21552e-21	90.48
2	AGAP005916	0	ubiquitin-conjugating enzyme E2 M [Source:VB Community Annotation]	D	7.22935e-06	90.48
2	AGAP005929	0	pyridoxine kinase [Source:VB Community Annotation]	M	4.94531e-05	85.71
2	AGAP005933	0	NFkappaB essential modulator [Source:VB Community Annotation]	I	2.04218e-26	95.24
2	AGAP005935	0	UPF0197	U	2.11459e-33	100
2	AGAP005947	RpS13	40S ribosomal protein S13 [Source:UniProtKB/Swiss-Prot%3BAcc:P52811]	RTT	3.19318e-62	100
2	AGAP005960	RpL7a	60S ribosomal protein L7a [Source:UniProtKB/Swiss-Prot%3BAcc:O76732]	RTT	5.59382e-86	100
2	AGAP005964	0	RNA binding	RTT	5.71199e-05	80.95
2	AGAP005981	0	DnaJ homolog subfamily A member 1 [Source:VB Community Annotation]	REDOX/STRESS/MIT	9.54458e-13	85.71
2	AGAP005991	RpL14	60S ribosomal protein L14 [Source:VB Community Annotation]	RTT	7.18042e-68	100
2	AGAP006037	RpL24	60S ribosomal protein L24 [Source:VB Community Annotation]	RTT	1.19908e-83	100
2	AGAP006043	0	Cop-coated vesicle membrane protein P24 [Source:VB Community Annotation]	TRP	1.54822e-15	80.95
2	AGAP006068	0	DUF229	U	1.12811e-09	95.24
2	AGAP006070	0	prefoldin 2 [Source:VB Community Annotation]	D	3.20734e-40	95.24
2	AGAP006097	0	target of Myb-like protein 2 [Source:VB Community Annotation]	D	3.88823e-23	80.95
2	AGAP006099	0	ubiquinol-cytochrome c reductase core subunit 2 [Source:VB Community Annotation]	D	1.71167e-34	100
2	AGAP006108	0	Y-box protein	D	2.38868e-23	100
2	AGAP006117	0	nudC	D	1.65647e-17	80.95
2	AGAP006125	0	Density-regulated protein [Source:UniProtKB/TrEMBL%3BAcc:Q7Q5Z2]	D	2.30994e-15	90.48
2	AGAP006130	eIF3l	Eukaryotic translation initiation factor 3 subunit L [Source:UniProtKB/Swiss-Prot%3BAcc:Q7Q5Y8]	RTT	1.95278e-48	95.24
2	AGAP006139	0	vacuolar protein sorting 26%2C vps26 [Source:VB Community Annotation]	TRP	2.60588e-15	90.48
2	AGAP006141	0	Capping protein (actin filament) muscle Z-line%2C alpha 1 [Source:VB Community Annotation]	CS	1.20367e-17	95.24
2	AGAP006186	Ca-P60A	Calcium-transporting ATPase sarcoplasmic/endoplasmic reticulum type [Source:UniProtKB/Swiss-Prot%3BAcc:Q7PPA5]	TRP	0.0001902	90.48
2	AGAP006204	0	Serine palmitoyltransferase-like	U	1.83453e-17	85.71
2	AGAP006209	0	carboxypeptidase B [Source:VB Community Annotation]	PROT	3.495e-22	80.95
2	AGAP006216	GPRMTH2	methuselah receptor 2 [Source:VB Community Annotation]	D	2.18664e-48	95.24
2	AGAP006238	0	ubiquitin-conjugating enzyme E2 C [Source:VB Community Annotation]	D	3.21077e-11	80.95
2	AGAP006243	0	phosphatidylinositol-4%2C5-bisphosphate 4-phosphatase [Source:VB Community Annotation]	D	2.52929e-27	95.24
2	AGAP006244	0	CTL-like protein 1 [Source:UniProtKB/Swiss-Prot%3BAcc:Q7Q5R7]	TRP	4.38811e-17	80.95
2	AGAP006246	0	Sorcin [Source:VB Community Annotation]	PROT	3.54964e-17	100
2	AGAP006278	0	Odorant-binding protein 99a - Drosophila melanogaster	CSR	1.69099e-47	95.24
2	AGAP006360	0	glutamate synthase (NADPH/NADH) [Source:VB Community Annotation]	M	5.33879e-06	90.48
2	AGAP006366	0	2-oxoglutarate dehydrogenase E1 component [Source:VB Community Annotation]	M	1.06944e-11	85.71
2	AGAP006367	0	no poles/Zinc finger, RING-type	D	6.75644e-22	85.71
2	AGAP006383	0	oligosaccharyltransferase complex subunit beta [Source:VB Community Annotation]	D	8.89504e-22	85.71
2	AGAP006389	0	ribonuclease kappa [Source:VB Community Annotation]	RTT	4.50833e-22	80.95
2	AGAP006456	0	NADH dehydrogenase (ubiquinone) Fe-S protein 3 [Source:VB Community Annotation]	REDOX/STRESS/MIT	8.81346e-12	80.95
2	AGAP006459	SUI1	Protein translation factor SUI1 homolog [Source:UniProtKB/Swiss-Prot%3BAcc:P42678]	D	3.33257e-51	100
2	AGAP006478	0	Synaptic vesicle membrane protein VAT-1 homolog-like [Source:VB Community Annotation]	D	0.000833131	80.95
2	AGAP006518	0	charged multivesicular body protein 1 [Source:VB Community Annotation]	U	3.51689e-27	90.48
2	AGAP006522	0	Copz1 protein [Source:VB Community Annotation]	TRP	8.58045e-31	100
2	AGAP006543	0	Unknown	U	2.3517e-06	80.95
2	AGAP006607	eIF3i	Eukaryotic translation initiation factor 3 subunit I [Source:UniProtKB/Swiss-Prot%3BAcc:Q7PP77]	RTT	1.63774e-20	100
2	AGAP006612	RpL29	60S ribosomal protein L29 [Source:VB Community Annotation]	RTT	1.89549e-44	100
2	AGAP006614	0	transcription factor BTF3 homolog 4 [Source:VB Community Annotation]	RTT	9.50234e-53	100
2	AGAP006615	0	FK506-binding protein 8 [Source:VB Community Annotation]	U	3.33336e-21	80.95
2	AGAP006625	0	epsilonCOP	TRP	1.03263e-18	80.95
2	AGAP006630	0	NADH dehydrogenase (ubiquinone) 1 alpha subcomplex 1 [Source:VB Community Annotation]	REDOX/STRESS/MIT	0.000396436	95.24
2	AGAP006651	0	peroxisomal 3%2C2-trans-enoyl-CoA isomerase [Source:VB Community Annotation]	M	0.0011546	80.95
2	AGAP006688	0	signal recognition particle receptor subunit beta [Source:VB Community Annotation]	D	8.87544e-35	90.48
2	AGAP006690	0	BTB (POZ) domain containing 9 [Source:VB Community Annotation]	D	3.08416e-25	80.95
2	AGAP006733	Thoc4	THO complex subunit 4 [Source:VB Community Annotation]	D	8.03771e-24	100
2	AGAP006745	0	Ninjurin	I	3.08551e-28	100
2	AGAP006747	REL2	IMD pathway signalling NF-kappaB Relish-like transcription factor [Source:VB Community Annotation]	I	1.62334e-11	95.24
2	AGAP006766	0	nascent polypeptide-associated complex subunit alpha [Source:VB Community Annotation]	U	3.33325e-51	100
2	AGAP006771	eiger	eiger [Source:VB Community Annotation]	I	8.95395e-17	90.48
2	AGAP006782	0	ADP%2CATP carrier protein 1 [Source:VB Community Annotation]	TRP	1.4404e-43	100
2	AGAP006871	RpS4	40S ribosomal protein S4 [Source:UniProtKB/TrEMBL%3BAcc:Q7PT95]	RTT	6.64562e-84	100
2	AGAP006879	0	F-type H+-transporting ATPase subunit e [Source:VB Community Annotation]	TRP	1.6066e-09	100
2	AGAP006890	Arf3	ADP-ribosylation factor 3 [Source:VB Community Annotation]	D	4.04132e-08	85.71
2	AGAP006895	0	signal recognition particle subunit SRP19 [Source:VB Community Annotation]	D	2.73709e-21	95.24
2	AGAP006915	0	pyruvate dehydrogenase E2	D	2.12118e-16	95.24
2	AGAP006918	0	NADH dehydrogenase (ubiquinone) 1 alpha subcomplex 8 [Source:VB Community Annotation]	REDOX/STRESS/MIT	6.42917e-26	85.71
2	AGAP006921	0	CED6	U	1.02106e-28	95.24
2	AGAP006935	0	trailer hitch, a component of a ribonucleoprotein complex	D	0.000193879	85.71
2	AGAP006936	0	mitochondrial cytochrome c1 heme protein [Source:VB Community Annotation]	REDOX/STRESS/MIT	3.33338e-13	95.24
2	AGAP006937	0	ubiquitin-conjugating enzyme E2 variant [Source:VB Community Annotation]	D	2.62961e-12	90.48
2	AGAP006942	0	Importin-4 [Source:VB Community Annotation]	TRP	6.32544e-25	90.48
2	AGAP006944	eIF3e	Eukaryotic translation initiation factor 3 subunit E [Source:UniProtKB/Swiss-Prot%3BAcc:Q7QIL8]	RTT	4.77064e-26	95.24
2	AGAP006946	0	Prefoldin subunit 4 [Source:UniProtKB/TrEMBL%3BAcc:Q7QIM0]	D	1.18535e-07	80.95
2	AGAP006958	Hsp83	Heat shock protein 83 [Source:UniProtKB/Swiss-Prot%3BAcc:Q7PT10]	REDOX/STRESS/MIT	1.93349e-33	100
2	AGAP006959	0	molecular chaperone HtpG [Source:VB Community Annotation]	REDOX/STRESS/MIT	6.27791e-06	100
2	AGAP006961	0	molecular chaperone HtpG [Source:VB Community Annotation]	REDOX/STRESS/MIT	1.29269e-35	100
2	AGAP006996	0	mitochondrial translation elongation factor TU [Source:VB Community Annotation]	REDOX/STRESS/MIT	1.71564e-57	95.24
2	AGAP007000	0	Asterix family	D	2.59933e-14	85.71
2	AGAP007001	0	ubiquitin thioesterase OTU1 [Source:VB Community Annotation]	D	0.00167408	80.95
2	AGAP007024	0	nuclear transport factor 2 [Source:VB Community Annotation]	D	2.70949e-21	95.24
2	AGAP007045	LRIM15	leucine-rich immune protein (TM) [Source:VB Community Annotation]	I	5.06794e-21	80.95
2	AGAP007055	0	sodium-dependent dicarboxylate transporter sdcS [Source:VB Community Annotation]	TRP	4.64137e-29	95.24
2	AGAP007082	0	NADH dehydrogenase (ubiquinone) Fe-S protein 4 [Source:VB Community Annotation]	REDOX/STRESS/MIT	7.20986e-11	100
2	AGAP007087	RpL41	60s ribosomal protein L41 [Source:UniProtKB/TrEMBL%3BAcc:Q52P89]	RTT	1.61698e-69	100
2	AGAP007088	0	peptidyl-prolyl cis-trans isomerase B (cyclophilin B) [Source:VB Community Annotation]	D	6.72495e-91	100
2	AGAP007112	0	Pescadillo homolog [Source:UniProtKB/Swiss-Prot%3BAcc:Q7QIX1]	D	7.87035e-24	80.95
2	AGAP007120	0	nucleoside-diphosphate kinase [Source:VB Community Annotation]	D	1.32964e-73	100
2	AGAP007121	0	cytochrome b5 protein [Source:VB Community Annotation]	REDOX/STRESS/MIT	9.70102e-16	95.24
2	AGAP007131	0	AP-2 complex subunit mu-1 [Source:VB Community Annotation]	TRP	1.25278e-45	100
2	AGAP007137	0	Unknown	D	4.10431e-07	95.24
2	AGAP007157	RpS27	40S ribosomal protein S27 [Source:UniProtKB/TrEMBL%3BAcc:Q7PT96]	RTT	1.36052e-49	100
2	AGAP007172	0	translation initiation factor 4E [Source:VB Community Annotation]	RTT	1.32431e-15	90.48
2	AGAP007202	0	poly(A) RNA binding	U	4.7493e-12	95.24
2	AGAP007208	0	NADH dehydrogenase (ubiquinone) 1 alpha subcomplex 11 [Source:VB Community Annotation]	REDOX/STRESS/MIT	1.23321e-08	95.24
2	AGAP007209	0	Tetraspanin [Source:UniProtKB/TrEMBL%3BAcc:Q7PTA7]	D	6.22301e-57	100
2	AGAP007218	0	eukaryotic translation initiation factor 2%2C subunit 2 beta [Source:VB Community Annotation]	RTT	3.93248e-38	100
2	AGAP007237	HPX4	heme peroxidase 4 [Source:VB Community Annotation]	I	1.05891e-62	100
2	AGAP007243	0	26S protease regulatory subunit 8 [Source:VB Community Annotation]	D	5.96868e-21	90.48
2	AGAP007244	0	Ribosome biogenesis protein WDR12 homolog [Source:UniProtKB/Swiss-Prot%3BAcc:Q7QJ33]	RTT	8.95465e-28	85.71
2	AGAP007256	0	Multiple epidermal growth factor-like domains 10 [Source:VB Community Annotation]	D	4.81591e-10	90.48
2	AGAP007258	0	aconitate hydratase 1 / homoaconitase [Source:VB Community Annotation]	D	2.22772e-13	80.95
2	AGAP007259	0	TMEM9 protein [Source:VB Community Annotation]	D	8.50137e-15	95.24
2	AGAP007297	0	NADH dehydrogenase (ubiquinone) 1 beta subcomplex 5 [Source:VB Community Annotation]	REDOX/STRESS/MIT	0.00022205	95.24
2	AGAP007312	0	Unknown	U	1.36548e-57	100
2	AGAP007325	0	RNA-binding protein 1	RTT	9.94689e-05	80.95
2	AGAP007361	0	translocation protein SEC63 [Source:VB Community Annotation]	REDOX/STRESS/MIT	1.66866e-16	85.71
2	AGAP007362	0	SH3 domain-binding glutamic acid-rich-like protein 3 [Source:VB Community Annotation]	D	9.30629e-14	100
2	AGAP007366	0	Uncharacterised protein family, CD034/YQF4	U	1.83696e-31	100
2	AGAP007380	0	NADH dehydrogenase (ubiquinone) 1 beta subcomplex 11 [Source:VB Community Annotation]	REDOX/STRESS/MIT	3.29938e-19	95.24
2	AGAP007393	0	protein disulfide isomerase family A%2C member 3 [Source:VB Community Annotation]	D	4.52564e-112	100
2	AGAP007406	0	Elongation factor 1-alpha [Source:UniProtKB/TrEMBL%3BAcc:Q7PT29]	RTT	3.69852e-65	100
2	AGAP007473	0	FK506-binding nuclear protein [Source:VB Community Annotation]	U	1.24045e-34	100
2	AGAP007522	0	Adaptor-related protein complex 3%2C sigma 1 subunit [Source:VB Community Annotation]	D	2.80376e-26	85.71
2	AGAP007523	0	myosin heavy chain [Source:VB Community Annotation]	CS	2.29055e-05	85.71
2	AGAP007543	TPX3	thioredoxin peroxidase 3 [Source:VB Community Annotation]	I	6.31191e-17	90.48
2	AGAP007575	0	Unknown	U	4.01517e-12	100
2	AGAP007580	RpL18	60S ribosomal protein L18 [Source:UniProtKB/Swiss-Prot%3BAcc:Q7QJM5]	RTT	2.44396e-88	100
2	AGAP007593	0	glycerol-3-phosphate dehydrogenase (NAD+) [Source:VB Community Annotation]	M	7.04801e-06	80.95
2	AGAP007596	0	septin 7 [Source:VB Community Annotation]	CS	8.49844e-10	95.24
2	AGAP007609	0	DAZ associated protein 2	U	1.93688e-62	100
2	AGAP007619	0	cytosolic nonspecific dipeptidase [Source:VB Community Annotation]	PROT	1.60784e-56	100
2	AGAP007620	0	DnaJ homolog subfamily C member 5 [Source:VB Community Annotation]	REDOX/STRESS/MIT	1.85069e-20	90.48
2	AGAP007621	0	cytochrome c oxidase VIIc [Source:VB Community Annotation]	REDOX/STRESS/MIT	4.64776e-07	100
2	AGAP007629	LANB2	laminin gamma 1 [Source:VB Community Annotation]	CS	4.65973e-63	100
2	AGAP007635	0	60S ribosomal protein L7 [Source:VB Community Annotation]	RTT	2.99949e-17	90.48
2	AGAP007638	0	oligosaccharyltransferase complex subunit delta (ribophorin II) [Source:VB Community Annotation]	D	5.4798e-76	100
2	AGAP007643	0	Tyrosine 3-monooxygenase/tryptophan 5-monooxygenase activation protein%2C beta polypeptide 2 [Source:VB Community Annotation]	D	5.01108e-32	100
2	AGAP007644	0	mRNA turnover protein 4 [Source:VB Community Annotation]	RTT	7.69304e-11	85.71
2	AGAP007668	eIF3g	Eukaryotic translation initiation factor 3 subunit G [Source:UniProtKB/Swiss-Prot%3BAcc:Q7QJV0]	RTT	7.74736e-12	95.24
2	AGAP007698	0	syntaxin 1A [Source:VB Community Annotation]	TRP	5.64857e-17	95.24
2	AGAP007699	0	GTP-binding nuclear protein Ran [Source:VB Community Annotation]	D	2.02541e-53	100
2	AGAP007721	0	Synaptobrevin	TRP	1.81629e-10	100
2	AGAP007722	Adk2	adenylate kinase 2%2C mitochondrial [Source:VB Community Annotation]	D	1.25744e-08	85.71
2	AGAP007740	RpLP1	60S ribosomal protein LP1 [Source:VB Community Annotation]	RTT	1.3298e-77	100
2	AGAP007768	0	mitochondrial cytochrome c oxidase subunit VIC [Source:VB Community Annotation]	REDOX/STRESS/MIT	3.79138e-14	100
2	AGAP007784	0	enoyl-CoA hydratase / long-chain 3-hydroxyacyl-CoA dehydrogenase [Source:VB Community Annotation]	M	1.56071e-38	85.71
2	AGAP007790	0	sodium/potassium-transporting ATPase subunit beta [Source:VB Community Annotation]	TRP	7.66378e-09	85.71
2	AGAP007806	0	myosin light chain%2C invertebrate [Source:VB Community Annotation]	CS	4.24377e-11	95.24
2	AGAP007809	AP7862	Leucine aminopeptidase/peptidase B	PROT	6.01003e-51	90.48
2	AGAP007827	Eno	enolase [Source:VB Community Annotation]	D	6.66324e-11	85.71
2	AGAP007841	0	F-type H+-transporting ATPase subunit delta [Source:VB Community Annotation]	TRP	3.75786e-18	95.24
2	AGAP007852	0	aconitate hydratase 1 / homoaconitase [Source:VB Community Annotation]	D	4.02295e-20	85.71
2	AGAP007864	0	F-actin capping protein subunit beta [Source:VB Community Annotation]	D	2.27219e-59	95.24
2	AGAP007867	0	Unknown	U	1.77423e-18	100
2	AGAP007871	0	mitochondrial import receptor subunit TOM40 [Source:VB Community Annotation]	REDOX/STRESS/MIT	9.14198e-23	90.48
2	AGAP007901	0	Ras-related protein Rab-5C [Source:VB Community Annotation]	D	6.82677e-24	100
2	AGAP007920	0	glucuronosyltransferase [Source:VB Community Annotation]	M	0.000313577	85.71
2	AGAP007921	0	sterol carrier protein 2 [Source:VB Community Annotation]	M	9.00403e-14	95.24
2	AGAP007926	0	Cleft lip and palate transmembrane 1	U	4.39958e-15	80.95
2	AGAP007927	RpL40	60S ribosomal protein L40 [Source:VB Community Annotation]	RTT	3.54336e-43	100
2	AGAP007938	cact	protein cactus (TOLL pathway signalling) [Source:VB Community Annotation]	I	1.49386e-10	80.95
2	AGAP007940	0	Reticulon-like protein [Source:UniProtKB/TrEMBL%3BAcc:A0A1S4GWR7]	D	2.9152e-10	90.48
2	AGAP007957	0	choline/ethanolamine kinase [Source:VB Community Annotation]	M	2.05808e-15	100
2	AGAP007966	0	F-type H+-transporting ATPase subunit gamma [Source:VB Community Annotation]	TRP	7.91251e-35	100
2	AGAP007975	0	pyruvate dehydrogenase E2 component (dihydrolipoamide acetyltransferase) [Source:VB Community Annotation]	D	1.17458e-10	90.48
2	AGAP008000	0	sepiapterin reductase [Source:VB Community Annotation]	REDOX/STRESS/MIT	7.96685e-05	95.24
2	AGAP008001	RpS27a	40S ribosomal protein S27a [Source:VB Community Annotation]	RTT	6.16042e-19	100
2	AGAP008008	0	coiled-coil domain-containing protein 72 homolog [Source:VB Community Annotation]	U	3.18965e-07	95.24
2	AGAP008075	0	cellular nucleic acid-binding protein [Source:VB Community Annotation]	D	8.34067e-34	100
2	AGAP008086	0	mitochondrial processing peptidase [Source:VB Community Annotation]	REDOX/STRESS/MIT	7.71635e-19	80.95
2	AGAP008163	0	U4/U6 small nuclear ribonucleoprotein SNU13 [Source:VB Community Annotation]	RTT	7.02965e-13	100
2	AGAP008167	0	abhydrolase domain containing 4 [Source:VB Community Annotation]	D	0.00149181	85.71
2	AGAP008249	0	T-complex protein%2C epsilon subunit [Source:VB Community Annotation]	D	1.59507e-20	100
2	AGAP008265	0	seryl-tRNA synthetase [Source:VB Community Annotation]	D	4.13556e-27	100
2	AGAP008280	D7r5	D7 short form salivary protein [Source:VB Community Annotation]	CSR	1.0805e-11	85.71
2	AGAP008297	0	leucyl-tRNA synthetase [Source:VB Community Annotation]	D	6.69164e-44	90.48
2	AGAP008303	0	splicing factor%2C arginine/serine-rich 7 [Source:VB Community Annotation]	RTT	2.74425e-17	90.48
2	AGAP008327	0	DnaJ homolog subfamily B member 11 [Source:VB Community Annotation]	REDOX/STRESS/MIT	7.83922e-40	100
2	AGAP008329	RpS5	40S ribosomal protein S5 [Source:VB Community Annotation]	RTT	1.83539e-75	100
2	AGAP008332	0	replication factor A2 [Source:VB Community Annotation]	RTT	6.22161e-27	80.95
2	AGAP008345	0	methionyl aminopeptidase [Source:VB Community Annotation]	M	1.3074e-27	80.95
2	AGAP008368	TEP14	thioester-containing protein 14 [Source:VB Community Annotation]	I	7.1286e-46	90.48
2	AGAP008408	0	Unknown	D	1.27544e-13	80.95
2	AGAP008491	0	oligosaccharyltransferase complex subunit epsilon [Source:VB Community Annotation]	D	7.56013e-25	100
2	AGAP008494	0	signal transducing adaptor molecule [Source:VB Community Annotation]	D	1.91959e-06	80.95
2	AGAP008503	0	FUN14 family	U	1.91746e-05	95.24
2	AGAP008521	0	low density lipoprotein receptor adapter protein 1 [Source:VB Community Annotation]	TRP	1.93735e-07	85.71
2	AGAP008524	0	Unknown	U	7.04018e-28	95.24
2	AGAP008527	0	CD63 antigen [Source:VB Community Annotation]	D	8.39557e-37	90.48
2	AGAP008615	0	Canopy homolog 2 [Source:VB Community Annotation]	D	3.49182e-28	85.71
2	AGAP008617	0	26S proteasome regulatory subunit N11 [Source:VB Community Annotation]	D	2.2234e-23	95.24
2	AGAP008632	0	alpha-aminoadipic semialdehyde synthase [Source:VB Community Annotation]	REDOX/STRESS/MIT	7.2941e-35	95.24
2	AGAP008653	0	NADH dehydrogenase (ubiquinone) 1 alpha subcomplex 12 [Source:VB Community Annotation]	REDOX/STRESS/MIT	2.26653e-23	95.24
2	AGAP008667	0	Hydroxysteroid (17-beta) dehydrogenase 4 [Source:VB Community Annotation]	REDOX/STRESS/MIT	9.90297e-21	100
2	AGAP008693	0	Leptin receptor overlapping transcript-like 1 [Source:VB Community Annotation]	D	2.06904e-16	85.71
2	AGAP008724	0	mitochondrial cytochrome c oxidase subunit 5B isoform 1 [Source:VB Community Annotation]	REDOX/STRESS/MIT	1.39012e-18	100
2	AGAP008727	0	cytochrome c oxidase subunit 4%2C mitochondrial precursor [Source:VB Community Annotation]	REDOX/STRESS/MIT	1.74246e-18	100
2	AGAP008737	0	cytohesin-1 [Source:VB Community Annotation]	TRP	1.29559e-06	90.48
2	AGAP008753	0	Barrier-to-autointegration factor B [Source:VB Community Annotation]	D	8.78414e-05	85.71
2	AGAP008757	0	DUF2053	U	8.71971e-13	85.71
2	AGAP008761	0	translocon-associated protein subunit gamma [Source:VB Community Annotation]	D	1.96073e-34	95.24
2	AGAP008816	Prosalpha5	26S proteasome alpha 5 subunit [Source:VB Community Annotation]	D	2.75463e-21	90.48
2	AGAP008822	0	FK506-binding protein 14 [Source:VB Community Annotation]	U	3.50498e-71	100
2	AGAP008837	0	20S proteasome subunit beta 4 [Source:VB Community Annotation]	D	7.02652e-25	95.24
2	AGAP008838	0	minor histocompatibility antigen H13 [Source:VB Community Annotation]	D	5.47584e-28	90.48
2	AGAP008849	0	D-3-phosphoglycerate dehydrogenase [Source:VB Community Annotation]	D	7.02516e-11	80.95
2	AGAP008895	0	actin related protein 2/3 complex%2C subunit 5 [Source:VB Community Annotation]	CS	1.11348e-16	80.95
2	AGAP008905	0	Brain protein I3	U	9.05877e-15	90.48
2	AGAP008908	0	actin-related protein 2/3 complex subunit 1A [Source:VB Community Annotation]	CS	3.94053e-27	100
2	AGAP008909	0	phosphatidylethanolamine binding	D	4.49843e-22	100
2	AGAP008914	0	Unknown	U	4.39292e-18	85.71
2	AGAP008916	RpL7	60S ribosomal protein L7 [Source:VB Community Annotation]	RTT	4.90487e-73	100
2	AGAP008929	0	threonyl-tRNA synthetase [Source:VB Community Annotation]	D	3.13333e-16	95.24
2	AGAP008952	0	lupus La protein [Source:VB Community Annotation]	D	1.2517e-14	85.71
2	AGAP008955	0	ubiquinol-cytochrome c reductase iron-sulfur subunit [Source:VB Community Annotation]	D	2.67173e-18	95.24
2	AGAP008985	0	DnaJ homolog subfamily C member 7 [Source:VB Community Annotation]	REDOX/STRESS/MIT	8.48696e-07	80.95
2	AGAP009031	RpL5	60S ribosomal protein L5 [Source:VB Community Annotation]	RTT	6.3805e-70	100
2	AGAP009059	0	Glia maturation factor beta [Source:VB Community Annotation]	D	1.65396e-19	80.95
2	AGAP009075	0	ATP-dependent RNA helicase UAP56/SUB2 [Source:VB Community Annotation]	RTT	2.23218e-30	95.24
2	AGAP009082	DOX-A2	26S proteasome non-ATPase regulatory subunit 3 [Source:VB Community Annotation]	D	7.16653e-21	80.95
2	AGAP009105	0	Serine/threonine-protein phosphatase 2A 65 kDa regulatory subunit A beta isoform isoform c [Source:VB Community Annotation]	D	6.35862e-30	90.48
2	AGAP009119	0	suppressor of tumorigenicity protein 13 [Source:VB Community Annotation]	D	2.45074e-19	85.71
2	AGAP009135	0	ATP-dependent RNA helicase DDX6/DHH1 [Source:VB Community Annotation]	RTT	2.78227e-06	95.24
2	AGAP009154	ARC-P34	actin-related protein 2/3 complex subunit 2 [Source:VB Community Annotation]	CS	1.19519e-13	100
2	AGAP009156	0	BRICHOS domain	D	9.21568e-06	100
2	AGAP009172	0	prolyl oligopeptidase [Source:VB Community Annotation]	M	3.09698e-19	100
2	AGAP009182	0	protein transport protein SEC61 subunit alpha [Source:VB Community Annotation]	TRP	3.06593e-56	100
2	AGAP009192	GSTE5	glutathione S-transferase epsilon class 5 [Source:VB Community Annotation]	REDOX/STRESS/MIT	3.43262e-05	80.95
2	AGAP009200	0	collagen type IV alpha [Source:VB Community Annotation]	CS	1.97002e-80	100
2	AGAP009201	0	collagen type IV alpha [Source:VB Community Annotation]	CS	2.14972e-66	95.24
2	AGAP009202	0	selenoprotein T [Source:VB Community Annotation]	D	2.4632e-14	85.71
2	AGAP009204	eIF3h	Eukaryotic translation initiation factor 3 subunit H [Source:UniProtKB/Swiss-Prot%3BAcc:Q7PVR3]	RTT	7.24574e-16	95.24
2	AGAP009265	0	ectonucleoside triphosphate diphosphohydrolase 5/6 [Source:VB Community Annotation]	D	1.3394e-05	80.95
2	AGAP009271	Prosbeta1	26S proteasome beta 1 subunit [Source:VB Community Annotation]	D	1.28088e-07	100
2	AGAP009288	0	Derlin-1 [Source:VB Community Annotation]	D	4.98248e-14	85.71
2	AGAP009324	RpL34	60S ribosomal protein L34 [Source:VB Community Annotation]	RTT	2.03883e-69	100
2	AGAP009334	0	V-type H+-transporting ATPase 21kDa proteolipid subunit [Source:VB Community Annotation]	TRP	1.15536e-14	95.24
2	AGAP009336	0	RNA recognition motif domain	RTT	7.15389e-45	95.24
2	AGAP009431	RpS21	40S ribosomal protein S21 [Source:UniProtKB/TrEMBL%3BAcc:Q7PTN4]	RTT	2.31421e-36	100
2	AGAP009441	0	elongation factor 2 [Source:VB Community Annotation]	RTT	5.17695e-53	100
2	AGAP009443	0	excitatory amino acid transporter 3 [Source:VB Community Annotation]	TRP	3.27145e-08	100
2	AGAP009444	0	chromobox protein 5 [Source:VB Community Annotation]	U	1.83175e-14	95.24
2	AGAP009486	0	V-type H+-transporting ATPase 54 kD subunit [Source:VB Community Annotation]	TRP	6.55831e-05	90.48
2	AGAP009491	0	F-type H+-transporting ATPase subunit g [Source:VB Community Annotation]	TRP	3.87353e-08	100
2	AGAP009493	alpha9	nicotinic acetylcholine receptor subunit alpha 9 [Source:VB Community Annotation]	TRP	1.11939e-33	95.24
2	AGAP009505	0	T-complex protein 1%2C delta subunit [Source:VB Community Annotation]	D	8.65706e-48	100
2	AGAP009508	RpL9	60S ribosomal protein L9 [Source:VB Community Annotation]	RTT	6.72766e-89	100
2	AGAP009510	0	Malate dehydrogenase (Fragment) [Source:UniProtKB/TrEMBL%3BAcc:Q7PSB4]	M	5.49705e-16	100
2	AGAP009522	0	fibronectin type-III domain-containing protein 3a [Source:VB Community Annotation]	D	9.50731e-14	95.24
2	AGAP009537	0	cytochrome c [Source:VB Community Annotation]	REDOX/STRESS/MIT	8.83531e-39	100
2	AGAP009538	alpha-Adaptin	AP-2 complex subunit alpha [Source:UniProtKB/Swiss-Prot%3BAcc:Q7QG73]	TRP	3.77599e-28	95.24
2	AGAP009547	0	torsin A [Source:VB Community Annotation]	D	2.24071e-39	85.71
2	AGAP009554	0	Nuclear envelope localisation domain	CS	0.000950696	85.71
2	AGAP009569	0	syntenin-1 isoform 1 [Source:VB Community Annotation]	D	2.1289e-23	90.48
2	AGAP009570	0	RNA-binding protein with serine-rich domain 1 [Source:VB Community Annotation]	RTT	2.83545e-10	80.95
2	AGAP009572	RpS15a-2	40S ribosomal protein S15a [Source:VB Community Annotation]	RTT	1.32724e-25	100
2	AGAP009584	TRX1	Thioredoxin [Source:UniProtKB/TrEMBL%3BAcc:Q9NGZ1]	REDOX/STRESS/MIT	2.44906e-52	100
2	AGAP009595	0	sodium/potassium-transporting ATPase subunit beta [Source:VB Community Annotation]	TRP	9.01324e-09	85.71
2	AGAP009602	0	NADH dehydrogenase (ubiquinone) 1 beta subcomplex 6 [Source:VB Community Annotation]	REDOX/STRESS/MIT	3.67726e-06	100
2	AGAP009621	0	alpha-N-acetylgalactosaminidase [Source:VB Community Annotation]	D	1.40081e-19	80.95
2	AGAP009623	GAPDH	glyceraldehyde 3-phosphate dehydrogenase [Source:VB Community Annotation]	D	1.73416e-29	95.24
2	AGAP009642	0	prohibitin 2 [Source:VB Community Annotation]	D	9.67858e-09	90.48
2	AGAP009647	0	proteasome maturation protein [Source:VB Community Annotation]	D	1.50667e-05	95.24
2	AGAP009651	0	CD63 antigen [Source:VB Community Annotation]	D	1.63255e-36	100
2	AGAP009652	0	NADH dehydrogenase (ubiquinone) 1 alpha subcomplex 13 [Source:VB Community Annotation]	REDOX/STRESS/MIT	1.10636e-05	100
2	AGAP009668	0	lysosomal-associated membrane protein 1/2 [Source:VB Community Annotation]	D	9.9096e-54	100
2	AGAP009670	SRPN4	serine protease inhibitor (serpin) 4 [Source:VB Community Annotation]	I	8.1257e-37	100
2	AGAP009694	0	T-complex protein 1 subunit beta [Source:VB Community Annotation]	D	2.49262e-24	100
2	AGAP009738	GRX3	glutaredoxin [Source:VB Community Annotation]	REDOX/STRESS/MIT	1.5049e-15	95.24
2	AGAP009742	0	splicing factor%2C arginine/serine-rich 2 [Source:VB Community Annotation]	RTT	4.21428e-11	85.71
2	AGAP009816	0	anterior pharynx defective 1 [Source:VB Community Annotation]	D	9.92795e-07	80.95
2	AGAP009823	0	Uncharacterized conserved protein (DUF2359)	U	1.12254e-46	95.24
2	AGAP009833	0	voltage-dependent anion-selective channel protein 2 [Source:VB Community Annotation]	TRP	5.05421e-41	100
2	AGAP009835	ABCC14	ATP-binding cassette transporter (ABC transporter) family C member 14 [Source:VB Community Annotation]	TRP	8.299e-09	80.95
2	AGAP009844	CLIPB15	CLIP-domain serine protease [Source:VB Community Annotation]	I	5.34412e-31	80.95
2	AGAP009849	0	SP14D1 [Source:VB Community Annotation]	PROT	2.27e-50	85.71
2	AGAP009861	0	Profilin protein [Source:VB Community Annotation]	CS	3.36451e-63	100
2	AGAP009863	0	eukaryotic translation initiation factor 4A%2C isoform 2 [Source:VB Community Annotation]	RTT	2.38209e-62	100
2	AGAP009865	0	NADH dehydrogenase (ubiquinone) 1 beta subcomplex 9 [Source:VB Community Annotation]	REDOX/STRESS/MIT	0.000233335	95.24
2	AGAP009883	0	Bax inhibitor 1-related	D	6.14745e-15	85.71
2	AGAP009907	0	leukotriene-A4 hydrolase [Source:VB Community Annotation]	PROT	4.12228e-34	100
2	AGAP009920	RpL37a	60S ribosomal protein L37a [Source:VB Community Annotation]	RTT	3.02003e-57	100
2	AGAP009944	0	Retinal dehydrogenase 2 [Source:VB Community Annotation]	M	1.84295e-23	95.24
2	AGAP009949	0	oxidoreductase GLYR1 homolog [Source:VB Community Annotation]	M	3.88293e-23	80.95
2	AGAP009979	0	glycoprotein-N-acetylgalactosamine 3-beta-galactosyltransferase [Source:VB Community Annotation]	M	4.41349e-20	80.95
2	AGAP009998	RpS11	40S ribosomal protein S11 [Source:UniProtKB/Swiss-Prot%3BAcc:P52812]	RTT	1.77001e-56	100
2	AGAP010010	0	oligosaccharyltransferase complex subunit gamma [Source:VB Community Annotation]	D	4.93374e-32	100
2	AGAP010039	NADH_dehyd	NADH dehydrogenase (ubiquinone) flavoprotein 1	REDOX/STRESS/MIT	2.50467e-33	95.24
2	AGAP010065	RpL12	60S ribosomal protein L12 [Source:VB Community Annotation]	RTT	3.73716e-58	100
2	AGAP010075	0	U4/U6.U5 tri-snRNP-associated protein 3 [Source:VB Community Annotation]	RTT	5.59824e-17	90.48
2	AGAP010131	0	ornithine decarboxylase antizyme 1 [Source:VB Community Annotation]	M	2.84713e-25	100
2	AGAP010133	SCRBQ2	Class B Scavenger Receptor (CD36 domain). [Source:VB Community Annotation]	I	1.20812e-15	85.71
2	AGAP010159	0	dUTP pyrophosphatase [Source:VB Community Annotation]	M	1.05012e-12	80.95
2	AGAP010163	RpL38	60S ribosomal protein L38 [Source:UniProtKB/Swiss-Prot%3BAcc:Q7Q0U1]	RTT	2.34525e-49	100
2	AGAP010172	0	protein phosphatase 2 (formerly 2A)%2C catalytic subunit [Source:VB Community Annotation]	D	3.51313e-13	95.24
2	AGAP010173	Rack1	guanine nucleotide-binding protein subunit beta-like protein [Source:VB Community Annotation]	D	1.66188e-47	100
2	AGAP010174	0	oligosaccharyltransferase complex subunit alpha (ribophorin I) [Source:VB Community Annotation]	D	2.12763e-69	100
2	AGAP010175	0	adenylyl cyclase-associated protein 1 [Source:VB Community Annotation]	D	5.30072e-40	100
2	AGAP010177	0	replication factor A3 [Source:VB Community Annotation]	RTT	3.63123e-36	90.48
2	AGAP010188	0	stress-induced-phosphoprotein 1 [Source:VB Community Annotation]	D	1.06361e-21	90.48
2	AGAP010191	0	calumenin isoform b precursor [Source:VB Community Annotation]	U	1.44407e-09	85.71
2	AGAP010214	0	Kruppel homolog 2	D	8.85152e-10	85.71
2	AGAP010216	RpL25	60S ribosomal protein L25 [Source:VB Community Annotation]	RTT	3.86585e-57	100
2	AGAP010224	0	ER lumen protein retaining receptor [Source:VB Community Annotation]	TRP	3.86652e-45	100
2	AGAP010225	0	ER lumen protein retaining receptor [Source:VB Community Annotation]	TRP	1.31259e-37	95.24
2	AGAP010226	0	Unknown	U	6.21879e-09	90.48
2	AGAP010234	0	microsomal triglyceride transfer protein large subunit [Source:VB Community Annotation]	D	2.4468e-24	80.95
2	AGAP010251	0	coatomer protein complex%2C subunit alpha (xenin) [Source:VB Community Annotation]	TRP	9.64293e-22	85.71
2	AGAP010252	RpL23	60S ribosomal protein L23 [Source:VB Community Annotation]	RTT	3.50223e-62	100
2	AGAP010253	Prosalpha6	26S proteasome alpha 6 subunit [Source:VB Community Annotation]	D	2.72777e-26	85.71
2	AGAP010257	RpL13a	60S ribosomal protein L13a [Source:VB Community Annotation]	RTT	3.00991e-55	100
2	AGAP010297	0	TACC	D	2.62786e-06	80.95
2	AGAP010298	0	V-type H+-transporting ATPase subunit D [Source:VB Community Annotation]	TRP	3.60796e-14	85.71
2	AGAP010310	0	eukaryotic peptide chain release factor subunit [Source:VB Community Annotation]	TRP	3.31252e-20	80.95
2	AGAP010331	0	heat shock protein 110kDa [Source:VB Community Annotation]	REDOX/STRESS/MIT	2.663e-18	95.24
2	AGAP010337	0	ubiquinol-cytochrome c reductase subunit 8 [Source:VB Community Annotation]	D	1.4527e-25	100
2	AGAP010347	CuSOD3	copper-zinc superoxide dismutase 3 [Source:VB Community Annotation]	REDOX/STRESS/MIT	1.47338e-35	100
2	AGAP010386	0	Translocating chain-associated membrane protein 2 [Source:VB Community Annotation]	D	2.74439e-21	85.71
2	AGAP010392	0	calumenin [Source:VB Community Annotation]	U	1.91055e-89	100
2	AGAP010445	0	Rab11 family-interacting protein 3/4 [Source:VB Community Annotation]	D	9.4883e-21	95.24
2	AGAP010464	0	NADH dehydrogenase (ubiquinone) 1 alpha/beta subcomplex 1 [Source:VB Community Annotation]	REDOX/STRESS/MIT	1.76573e-35	100
2	AGAP010499	AD20590	S-(hydroxymethyl)glutathione dehydrogenase [Source:UniProtKB/TrEMBL%3BAcc:A0A1S4H465]	M	4.91045e-24	95.24
2	AGAP010510	0	Tubulin beta chain [Source:UniProtKB/TrEMBL%3BAcc:Q7PPR6]	CS	6.48122e-33	95.24
2	AGAP010536	0	nucleolar complex protein 2 [Source:VB Community Annotation]	D	2.42656e-22	80.95
2	AGAP010552	0	mimitin%2C mitochondrial [Source:VB Community Annotation]	D	6.94419e-05	95.24
2	AGAP010553	0	poly(U)-binding-splicing factor PUF60 [Source:VB Community Annotation]	D	5.83422e-11	95.24
2	AGAP010557	0	B-cell receptor-associated protein 31 [Source:VB Community Annotation]	D	4.18295e-23	90.48
2	AGAP010558	0	ER membrane protein complex subunit 4 [Source:UniProtKB/TrEMBL%3BAcc:Q7Q8U0]	U	6.90307e-07	90.48
2	AGAP010580	0	Farnesoic acid 0-methyl transferase	M	1.14718e-82	100
2	AGAP010586	0	aminoacyl tRNA synthase complex-interacting multifunctional protein 1 [Source:VB Community Annotation]	RTT	3.49064e-08	80.95
2	AGAP010588	0	T-complex protein 1 subunit theta [Source:VB Community Annotation]	D	5.52373e-54	100
2	AGAP010589	0	guanine nucleotide-binding protein subunit gamma [Source:VB Community Annotation]	D	1.48283e-45	100
2	AGAP010591	RpS20	40S ribosomal protein S20 [Source:VB Community Annotation]	RTT	2.78389e-46	100
2	AGAP010592	S7	40S ribosomal protein S7 [Source:UniProtKB/Swiss-Prot%3BAcc:P33514]	RTT	1.10971e-83	100
2	AGAP010608	0	Clathrin light chain [Source:UniProtKB/TrEMBL%3BAcc:Q5TSE5]	TRP	7.83014e-13	100
2	AGAP010612	0	elongation factor 1-beta [Source:VB Community Annotation]	RTT	1.08552e-31	100
2	AGAP010623	0	X box-binding protein 1 [Source:VB Community Annotation]	D	1.62593e-35	100
2	AGAP010679	TIM10	mitochrondrial inner membrane translocase subunit TIM10 [Source:VB Community Annotation]	REDOX/STRESS/MIT	2.51336e-12	80.95
2	AGAP010718	0	20S proteasome subunit beta 5 [Source:VB Community Annotation]	D	5.70381e-11	80.95
2	AGAP010727	0	Mucin	U	4.41616e-59	100
2	AGAP010730	0	prophenoloxidase activating factor [Source:VB Community Annotation]	I	3.70418e-32	80.95
2	AGAP010755	0	protein mago nashi [Source:VB Community Annotation]	D	2.77723e-27	100
2	AGAP010792	0	NADH dehydrogenase (ubiquinone) 1 alpha subcomplex 9 [Source:VB Community Annotation]	REDOX/STRESS/MIT	1.57096e-25	100
2	AGAP010815	TEP1	thioester-containing protein 1 [Source:VB Community Annotation]	I	4.40845e-42	95.24
2	AGAP010816	TEP3	thioester-containing protein 3 [Source:VB Community Annotation]	I	3.71051e-60	100
2	AGAP010876	0	molecular chaperone DnaK [Source:VB Community Annotation]	REDOX/STRESS/MIT	1.42393e-32	100
2	AGAP010929	tubB	Tubulin beta chain [Source:UniProtKB/TrEMBL%3BAcc:Q7PSI4]	CS	6.17899e-41	100
2	AGAP010933	RpS19	40S ribosomal protein S19 [Source:VB Community Annotation]	RTT	1.05096e-77	100
2	AGAP010934	0	Unknown	U	4.19185e-06	80.95
2	AGAP010957	0	calmodulin [Source:VB Community Annotation]	D	1.90895e-29	100
2	AGAP011034	0	Odz%2C odd Oz/ten-m homolog 1 [Source:VB Community Annotation]	D	6.34305e-41	100
2	AGAP011050	0	aldehyde reductase [Source:VB Community Annotation]	REDOX/STRESS/MIT	5.38717e-17	95.24
2	AGAP011054	TPX2	thioredoxin peroxidase 2 [Source:VB Community Annotation]	I	1.16284e-59	100
2	AGAP011076	0	ubiquitin-conjugating enzyme E2 I [Source:VB Community Annotation]	D	1.54747e-19	95.24
2	AGAP011077	RpS12	40S ribosomal protein S12 [Source:UniProtKB/TrEMBL%3BAcc:Q7PSP8]	RTT	2.52267e-39	100
2	AGAP011092	0	Polyadenylate-binding protein [Source:UniProtKB/TrEMBL%3BAcc:Q7QH99]	D	2.62411e-45	100
2	AGAP011107	GRX1	glutaredoxin [Source:VB Community Annotation]	REDOX/STRESS/MIT	9.69856e-08	100
2	AGAP011119	0	Lysozyme, I type	I	7.74438e-67	100
2	AGAP011131	0	F-type H+-transporting ATPase subunit d [Source:VB Community Annotation]	TRP	5.03752e-23	100
2	AGAP011133	0	Inosine-5'-monophosphate dehydrogenase [Source:VB Community Annotation]	D	7.49397e-27	85.71
2	AGAP011140	0	Protein canopy homolog 3 [Source:VB Community Annotation]	D	2.97262e-30	90.48
2	AGAP011157	0	cytosolic prostaglandin-E synthase [Source:VB Community Annotation]	D	1.58749e-34	95.24
2	AGAP011159	CoVa	cytochrome c oxidase subunit Va [Source:VB Community Annotation]	REDOX/STRESS/MIT	5.51454e-24	100
2	AGAP011161	0	transketolase [Source:VB Community Annotation]	D	6.65988e-26	95.24
2	AGAP011165	0	prefoldin [Source:VB Community Annotation]	D	1.27389e-10	100
2	AGAP011166	0	protein phosphatase 1%2C catalytic subunit [Source:VB Community Annotation]	D	3.83228e-14	95.24
2	AGAP011173	RpL11	60S ribosomal protein L11 [Source:VB Community Annotation]	RTT	2.14673e-78	100
2	AGAP011174	0	26S proteasome regulatory subunit T1 [Source:VB Community Annotation]	D	1.18311e-23	80.95
2	AGAP011190	0	eukaryotic translation initiation factor 2 subunit alpha [Source:VB Community Annotation]	RTT	7.44962e-29	95.24
2	AGAP011197	FBN9	FBN9	I	3.27977e-74	100
2	AGAP011228	0	FBN2	I	7.46839e-24	100
2	AGAP011247	0	Longitudinals lacking protein-like [Source:VB Community Annotation]	D	3.41176e-05	95.24
2	AGAP011251	0	ubiquitin-like protein 5 [Source:VB Community Annotation]	D	2.53283e-14	95.24
2	AGAP011284	0	Eukaryotic translation initiation factor 5A [Source:UniProtKB/TrEMBL%3BAcc:Q7PSR5]	RTT	5.59251e-91	100
2	AGAP011291	0	UPF0466 protein AGAP011291%2C mitochondrial [Source:VB Community Annotation]	U	5.36837e-06	80.95
2	AGAP011298	RpL10a	60S ribosomal protein L10a [Source:VB Community Annotation]	RTT	8.15382e-57	100
2	AGAP011300	NADH_b5_red	NADH-cytochrome b5 reductase [Source:UniProtKB/TrEMBL%3BAcc:Q7QHQ5]	REDOX/STRESS/MIT	4.83752e-08	80.95
2	AGAP011317	0	Unknown	U	4.49805e-14	80.95
2	AGAP011334	0	Failed axon connections protein [Source:VB Community Annotation]	D	8.68039e-05	90.48
2	AGAP011423	0	20S proteasome subunit beta 2 [Source:VB Community Annotation]	D	3.84525e-18	85.71
2	AGAP011424	RpS16	40S ribosomal protein S16 [Source:VB Community Annotation]	RTT	3.52323e-81	100
2	AGAP011438	0	Casein kinase II subunit beta [Source:UniProtKB/TrEMBL%3BAcc:A0NFB7]	D	2.40106e-17	85.71
2	AGAP011444	0	20S proteasome subunit beta 7 [Source:VB Community Annotation]	D	3.80776e-21	95.24
2	AGAP011457	0	ribose 5-phosphate isomerase A [Source:VB Community Annotation]	M	6.21969e-16	80.95
2	AGAP011484	0	Ig-like	U	4.26137e-06	95.24
2	AGAP011504	0	protein transport protein SEC61 subunit beta [Source:VB Community Annotation]	TRP	7.75863e-32	100
2	AGAP011521	0	28 kDa heat-and acid-stable phosphoprotein [Source:VB Community Annotation]	D	2.75817e-18	80.95
2	AGAP011532	0	septin [Source:VB Community Annotation]	CS	1.32454e-22	90.48
2	AGAP011537	0	Argonaute 3 [Source:VB Community Annotation]	RTT	3.73757e-11	90.48
2	AGAP011546	0	calcium channel flower [Source:VB Community Annotation]	D	7.6522e-12	90.48
2	AGAP011551	0	protein transport protein SEC31 [Source:VB Community Annotation]	TRP	8.74567e-19	90.48
2	AGAP011580	eIF3k	Eukaryotic translation initiation factor 3 subunit K [Source:UniProtKB/Swiss-Prot%3BAcc:Q7QGK4]	RTT	3.05994e-18	100
2	AGAP011581	mRpL12	39S ribosomal protein L12%2C mitochondrial [Source:VB Community Annotation]	RTT	4.52584e-17	90.48
2	AGAP011627	0	polyadenylate-binding protein-interacting protein 1 [Source:VB Community Annotation]	D	1.55443e-14	85.71
2	AGAP011629	0	dihydrolipoamide dehydrogenase [Source:VB Community Annotation]	M	2.42043e-29	95.24
2	AGAP011634	0	Fumarylacetoacetate hydrolase domain containing 2A [Source:VB Community Annotation]	M	1.33838e-15	80.95
2	AGAP011687	RpL27	60S ribosomal protein L27 [Source:UniProtKB/TrEMBL%3BAcc:Q5TMJ9]	RTT	2.67551e-77	100
2	AGAP011706	RpL27a	60S ribosomal protein L27a [Source:VB Community Annotation]	RTT	5.38194e-74	100
2	AGAP011730	0	ADP-ribosylation factor-like protein 1 [Source:VB Community Annotation]	D	1.46787e-22	85.71
2	AGAP011733	0	Unknown	D	0.000346963	90.48
2	AGAP011777	RpSA	40S ribosomal protein SA [Source:UniProtKB/Swiss-Prot%3BAcc:Q7PZ81]	RTT	5.11881e-75	100
2	AGAP011797	0	Wbp2 ortholog	D	2.21489e-17	95.24
2	AGAP011800	0	Transaldolase [Source:UniProtKB/TrEMBL%3BAcc:Q7PZ95]	M	2.73555e-33	95.24
2	AGAP011802	RpL39	60S ribosomal protein L39 [Source:VB Community Annotation]	RTT	1.63179e-44	100
2	AGAP011828	Cp1	cathepsin L [Source:VB Community Annotation]	PROT	1.73397e-24	100
2	AGAP011829	0	NADH dehydrogenase (ubiquinone) 1 beta subcomplex 4 [Source:VB Community Annotation]	REDOX/STRESS/MIT	4.60219e-08	85.71
2	AGAP011832	0	Death-associated protein 1 [Source:VB Community Annotation]	D	1.22371e-22	100
2	AGAP011833	0	enoyl-CoA hydratase [Source:VB Community Annotation]	M	1.09617e-07	90.48
2	AGAP011837	0	U6 snRNA-associated Sm-like protein LSm8 [Source:VB Community Annotation]	RTT	1.02822e-10	80.95
2	AGAP011842	0	signal peptidase complex subunit 2 [Source:VB Community Annotation]	D	4.48253e-40	100
2	AGAP011846	0	cytochrome b-561 domain containing protein 2 [Source:VB Community Annotation]	REDOX/STRESS/MIT	3.08694e-08	80.95
2	AGAP011859	0	Beta-glucuronidase [Source:UniProtKB/TrEMBL%3BAcc:Q7PZE2]	M	1.20505e-33	90.48
2	AGAP011872	0	ubiquitin-activating enzyme E1 [Source:VB Community Annotation]	D	1.39131e-10	95.24
2	AGAP011895	0	uroporphyrinogen decarboxylase [Source:VB Community Annotation]	M	3.3397e-20	95.24
2	AGAP011896	RpL31	60S ribosomal protein L31 [Source:VB Community Annotation]	RTT	2.75595e-51	100
2	AGAP011938	0	lamin [Source:VB Community Annotation]	CS	6.73684e-35	100
2	AGAP011940	0	sphingomyelin phosphodiesterase [Source:VB Community Annotation]	M	1.99788e-72	100
2	AGAP011964	0	Integrin alpha N-terminal domain superfamily	D	6.16727e-33	100
2	AGAP011974	SCRC1	Class C Scavenger Receptor (Sushi/SCR/CCP and Somatomedin B domains). [Source:VB Community Annotation]	I	9.14063e-95	100
2	AGAP011984	0	UDP-N-acetyl-alpha-D-galactosamine:polypeptide N-acetylgalactosaminyltransferase 20 [Source:VB Community Annotation]	M	3.18094e-25	85.71
2	AGAP011996	0	Unknown	TRP	1.30866e-23	90.48
2	AGAP012014	Arf1	ADP-ribosylation factor 1 [Source:VB Community Annotation]	D	2.1903e-46	100
2	AGAP012053	0	alpha%2Calpha-trehalase [Source:VB Community Annotation]	M	1.26455e-49	100
2	AGAP012056	0	cofilin [Source:VB Community Annotation]	CS	1.10459e-51	100
2	AGAP012081	0	F-type H+-transporting ATPase subunit beta [Source:VB Community Annotation]	TRP	4.9036e-36	100
2	AGAP012100	RpS26	40S ribosomal protein S26 [Source:UniProtKB/Swiss-Prot%3BAcc:Q9GT45]	RTT	2.29546e-79	100
2	AGAP012103	0	Insulin-like growth factor 2 mRNA-binding protein 2 [Source:VB Community Annotation]	D	1.53291e-12	80.95
2	AGAP012106	0	F-type H+-transporting ATPase subunit beta [Source:VB Community Annotation]	TRP	1.68524e-29	90.48
2	AGAP012113	0	ubiquitin carboxyl-terminal hydrolase L3 [Source:VB Community Annotation]	PROT	2.55925e-16	85.71
2	AGAP012135	0	26S proteasome regulatory subunit N8 [Source:VB Community Annotation]	D	8.9735e-13	90.48
2	AGAP012138	RpL21	60S ribosomal protein L21 [Source:VB Community Annotation]	RTT	2.82998e-68	100
2	AGAP012140	eIF3b	Eukaryotic translation initiation factor 3 subunit B [Source:UniProtKB/Swiss-Prot%3BAcc:Q7PZY1]	RTT	5.09797e-60	100
2	AGAP012145	0	Reactive oxygen species modulator 1 [Source:VB Community Annotation]	U	1.61553e-05	85.71
2	AGAP012168	0	Rho GDP-dissociation inhibitor [Source:VB Community Annotation]	D	1.11025e-06	90.48
2	AGAP012177	0	Aveugle [Source:VB Community Annotation]	D	2.25665e-11	80.95
2	AGAP012184	0	FK506-binding protein 1 [Source:VB Community Annotation]	U	3.64028e-36	100
2	AGAP012185	0	erythrocyte membrane protein band 4.1 [Source:VB Community Annotation]	D	4.51312e-08	95.24
2	AGAP012188	0	ubiquinol-cytochrome c reductase subunit 7 [Source:VB Community Annotation]	D	5.55541e-05	100
2	AGAP012199	0	Histone H2B [Source:UniProtKB/Swiss-Prot%3BAcc:Q27442]	RTT	2.25872e-17	95.24
2	AGAP012204	0	H/ACA ribonucleoprotein complex subunit 2 [Source:VB Community Annotation]	D	5.69866e-12	80.95
2	AGAP012208	0	glycosyltransferase 25 family member [Source:VB Community Annotation]	D	1.28299e-20	80.95
2	AGAP012235	0	prefoldin 6 [Source:VB Community Annotation]	D	1.63526e-05	85.71
2	AGAP012281	eIF3m	Eukaryotic translation initiation factor 3 subunit M [Source:UniProtKB/Swiss-Prot%3BAcc:Q7Q068]	RTT	5.30446e-34	90.48
2	AGAP012284	RpL18a-1	60S ribosomal protein L18a [Source:UniProtKB/TrEMBL%3BAcc:Q7PV82]	RTT	5.21498e-81	100
2	AGAP012307	0	Spondin-1 [Source:VB Community Annotation]	D	1.43849e-65	90.48
2	AGAP012334	0	high mobility group protein D%2C isoform C [Source:VB Community Annotation]	D	2.23613e-33	95.24
2	AGAP012339	0	Translocase of outer mitochondrial membrane 20 homolog [Source:VB Community Annotation]	REDOX/STRESS/MIT	4.41495e-09	100
2	AGAP012374	0	NADH dehydrogenase (ubiquinone) 1 beta subcomplex 3 [Source:VB Community Annotation]	REDOX/STRESS/MIT	8.76719e-16	100
2	AGAP012380	0	small nuclear ribonucleoprotein D3 [Source:VB Community Annotation]	RTT	6.67619e-18	80.95
2	AGAP012386	Nim C2	Nimrod C2	I	6.19655e-80	100
2	AGAP012407	0	protein disulfide-isomerase A1 [Source:VB Community Annotation]	D	2.14215e-95	100
2	AGAP012418	0	Unknown	U	6.97898e-05	100
2	AGAP012421	0	Unknown	U	3.2083e-09	80.95
2	AGAP012475	0	Unknown	D	2.09017e-17	85.71
2	AGAP012515	0	F-type H+-transporting ATPase subunit f [Source:VB Community Annotation]	TRP	4.57023e-18	100
2	AGAP012522	0	Unknown	U	5.03828e-09	85.71
2	AGAP012533	0	NADH dehydrogenase (ubiquinone) 1 alpha subcomplex 6 [Source:VB Community Annotation]	REDOX/STRESS/MIT	2.52256e-14	100
2	AGAP012587	0	Unknown	U	4.71329e-22	95.24
2	AGAP012608	0	20S proteasome subunit beta 7 [Source:VB Community Annotation]	D	1.07672e-18	80.95
2	AGAP012648	0	Sulfotransferase	D	4.51725e-14	80.95
2	AGAP012674	0	Unknown	U	3.44063e-25	100
2	AGAP012708	0	Unknown	RTT	6.83664e-05	95.24
2	AGAP012717	0	vesicle transport protein SEC22 [Source:VB Community Annotation]	TRP	3.45122e-05	80.95
2	AGAP012755	0	ER lumen protein retaining receptor [Source:VB Community Annotation]	TRP	1.14553e-37	95.24
2	AGAP012813	0	Unknown	D	3.01721e-12	80.95
2	AGAP012990	RpS23	40S ribosomal protein S23 [Source:VB Community Annotation]	RTT	6.96506e-48	100
2	AGAP012991	0	Fascin [Source:UniProtKB/TrEMBL%3BAcc:F5HLZ2]	U	8.46682e-14	85.71
2	AGAP013092	0	cytochrome c oxidase subunit VIb polypeptide 1 [Source:VB Community Annotation]	REDOX/STRESS/MIT	4.79229e-09	95.24
2	AGAP013103	0	Anopheles-specific TM protein	U	2.12835e-44	100
2	AGAP013186	0	Leucine rich repeat (LRR)	I	1.48888e-26	90.48
2	AGAP013189	0	Probable fatty acid-binding protein	U	1.62718e-11	90.48
2	AGAP013252	0	Unknown	U	1.30889e-67	80.95
2	AGAP013291	0	Trafficking protein particle complex 3 [Source:VB Community Annotation]	D	6.73702e-07	80.95
2	AGAP013333	0	Phosphate carrier%2C mitochondrial [Source:VB Community Annotation]	U	2.09043e-54	100
2	AGAP013398	0	DDRGK domain-containing protein 1 [Source:VB Community Annotation]	U	1.21034e-15	85.71
2	AGAP013400	0	fatty acid bindin protein	U	8.40072e-14	85.71
2	AGAP013440	0	SRA stem-loop-interacting RNA-binding protein%2C mitochondrial [Source:VB Community Annotation]	U	8.5443e-12	90.48
2	AGAP013509	0	carboxylesterase clade H%2C member 1 [Source:VB Community Annotation]	REDOX/STRESS/MIT	4.66465e-69	100
2	AGAP013519	0	U6 snRNA-associated Sm-like protein LSm3 [Source:VB Community Annotation]	RTT	2.35987e-05	80.95
2	AGAP013742	0	40S ribosomal protein S27a [Source:VB Community Annotation]	RTT	3.05559e-63	100
2	AGAP028015	0	LRR	U	4.38339e-08	90.48
2	AGAP028022	0	Ninjurin	I	2.23844e-18	80.95
2	AGAP028028	LRIM16A	leucine-rich immune protein (TM) [Source:VB Community Annotation]	I	1.19655e-95	100
2	AGAP028064	LRIM16B	leucine-rich immune protein (TM) [Source:VB Community Annotation]	I	6.0708e-60	100
2	AGAP028108	0	Niemann-Pick type C2 (Npc2) is a lysosomal protein in which a mutation in the gene causes a rare form of Niemann-Pick type C disease	I	8.38544e-09	95.24
2	AGAP028120	D7L3	D7 long form salivary protein [Source:VB Community Annotation]	CSR	1.0138e-19	80.95
2	AGAP028143	0	Spase22-23	U	2.35446e-30	100
2	AGAP028154	0	V-type proton ATPase proteolipid subunit [Source:UniProtKB/TrEMBL%3BAcc:A0A1S4HCY4]	TRP	3.27073e-50	100
2	AGAP028157	0	Unknown	U	1.84195e-13	100
2	AGAP028433	0	Unknown	U	5.52927e-06	85.71
2	AGAP028439	0	Unknown	U	5.63747e-46	100
2	AGAP028464	0	Unknown	U	2.66591e-36	100
2	AGAP028617	0	sortilin-related receptor [Source:VB Community Annotation]	U	2.63969e-11	100
2	AGAP028624	0	Unknown	U	0.00176436	80.95
2	AGAP028693	RpS18	40S ribosomal protein S18 [Source:VB Community Annotation]	RTT	1.79397e-59	100
2	AGAP028876	SSU_rRNA_eukarya	Eukaryotic small subunit ribosomal RNA [Source:RFAM%3BAcc:RF01960]	RTT	3.68382e-08	85.71
2	AGAP028997	SSU_rRNA_eukarya	Eukaryotic small subunit ribosomal RNA [Source:RFAM%3BAcc:RF01960]	RTT	2.85625e-05	100
2	AGAP029038	SSU_rRNA_eukarya	Eukaryotic small subunit ribosomal RNA [Source:RFAM%3BAcc:RF01960]	RTT	8.65584e-06	100
2	AGAP029054	NimB2	nimrod B2 [Source:VB Community Annotation]	I	1.59118e-125	100
2	AGAP029055	eater	Eater	I	1.70546e-34	100
3	AGAP000044	0	thioredoxin domain-containing protein [Source:VB Community Annotation]	D	5.74244e-18	82.14
3	AGAP000092	0	methylsterol monooxygenase [Source:VB Community Annotation]	M	1.56934e-123	100
3	AGAP000167	0	Lipid storage droplets surface-binding protein 2 [Source:VB Community Annotation]	D	2.39596e-57	92.86
3	AGAP000235	0	Thymosin [Source:VB Community Annotation]	CS	1.23592e-14	96.43
3	AGAP000249	0	mannosyl-glycoprotein endo-beta-N-acetylglucosaminidase [Source:VB Community Annotation]	M	1.33479e-89	100
3	AGAP000268	0	Unknown	U	6.16063e-90	92.86
3	AGAP000290	CLIPA27	CLIPA	I	6.18903e-77	89.29
3	AGAP000305	0	SPARC [Source:VB Community Annotation]	D	1.93982e-193	100
3	AGAP000358	0	Selenoprotein SelK/SelG	U	5.65419e-23	82.14
3	AGAP000376	Tsf1	transferrin 1	I	4.85493e-25	100
3	AGAP000385	0	Unknown	U	2.63896e-86	96.43
3	AGAP000415	0	5-hydroxyisourate hydrolase [Source:VB Community Annotation]	D	6.02426e-28	89.29
3	AGAP000462	0	peptidyl-prolyl isomerase F (cyclophilin D) [Source:VB Community Annotation]	D	1.49646e-46	96.43
3	AGAP000523	0	F-type H+-transporting ATPase subunit c [Source:VB Community Annotation]	TRP	9.98601e-27	96.43
3	AGAP000541	RpS15a-1	40S ribosomal protein S15a [Source:VB Community Annotation]	RTT	1.95274e-44	100
3	AGAP000651	Actin5C	Actin-5C [Source:UniProtKB/Swiss-Prot%3BAcc:P84185]	CS	4.58449e-49	100
3	AGAP000654	RpS30	40S ribosomal protein S30 [Source:UniProtKB/TrEMBL%3BAcc:Q7QEH2]	RTT	1.99551e-56	100
3	AGAP000655	RpS14-1	40S ribosomal protein S14a [Source:UniProtKB/Swiss-Prot%3BAcc:Q7QEH1]	RTT	7.69202e-62	100
3	AGAP000669	0	Unknown	U	1.62206e-05	82.14
3	AGAP000679	0	Aminoacylase [Source:UniProtKB/TrEMBL%3BAcc:Q7QEF5]	PROT	7.20093e-06	89.29
3	AGAP000739	RpS10	40S ribosomal protein S10 [Source:VB Community Annotation]	RTT	3.17686e-77	100
3	AGAP000790	0	Calycin-like	U	1.80973e-157	100
3	AGAP000804	GPXH2	glutathione peroxidase 2 [Source:VB Community Annotation]	REDOX/STRESS/MIT	3.88196e-114	100
3	AGAP000807	0	helix-loop-helix transcription factor [Source:VB Community Annotation]	RTT	4.07831e-60	100
3	AGAP000851	0	cytochrome c oxidase subunit 6a%2C mitochrondrial [Source:VB Community Annotation]	REDOX/STRESS/MIT	8.46132e-07	82.14
3	AGAP000852	0	Small ubiquitin-related modifier [Source:UniProtKB/TrEMBL%3BAcc:Q7PNJ2]	D	1.31294e-42	100
3	AGAP000883	0	elongation factor 1-gamma [Source:VB Community Annotation]	RTT	8.20231e-37	100
3	AGAP000927	0	myosin regulatory light chain%2C invertebrate [Source:VB Community Annotation]	CS	7.85169e-49	100
3	AGAP000952	RpL37	60S ribosomal protein L37 [Source:VB Community Annotation]	RTT	7.26689e-73	100
3	AGAP000953	RpL10-1	60S ribosomal protein L10-1 [Source:VB Community Annotation]	RTT	4.16973e-61	100
3	AGAP000964	0	3TM protein	U	7.91345e-35	100
3	AGAP001064	0	Transmembrane emp24 domain-containing protein 10 precursor [Source:VB Community Annotation]	TRP	3.38069e-28	96.43
3	AGAP001082	0	saposin [Source:VB Community Annotation]	D	3.83906e-77	100
3	AGAP001138	0	F-type H+-transporting ATPase subunit b [Source:VB Community Annotation]	TRP	3.34362e-13	85.71
3	AGAP001151	0	14-3-3 protein epsilon [Source:VB Community Annotation]	D	3.79006e-35	100
3	AGAP001256	0	3'-phosphoadenosine 5'-phosphosulfate synthase [Source:VB Community Annotation]	D	1.86674e-36	96.43
3	AGAP001264	0	Plasma glutamate carboxypeptidase [Source:VB Community Annotation]	PROT	3.78792e-103	100
3	AGAP001274	RpS15	40S ribosomal protein S15 [Source:VB Community Annotation]	RTT	9.40823e-74	100
3	AGAP001325	0	peroxiredoxin 5%2C atypical 2-Cys peroxiredoxin [Source:VB Community Annotation]	REDOX/STRESS/MIT	1.49126e-22	89.29
3	AGAP001367	0	beta-1%2C3-glucuronyltransferase [Source:VB Community Annotation]	M	1.91981e-27	82.14
3	AGAP001372	0	MAP Jupiter	U	4.79518e-39	100
3	AGAP001381	0	laminin%2C beta 1 [Source:VB Community Annotation]	CS	1.97409e-104	96.43
3	AGAP001387	0	Unknown	U	4.04226e-10	96.43
3	AGAP001408	RpL35	60S ribosomal protein L35 [Source:VB Community Annotation]	RTT	1.68774e-54	100
3	AGAP001419	0	RNA recognition motif domain	RTT	0.000263801	92.86
3	AGAP001459	RpL17	60S ribosomal protein L17 [Source:UniProtKB/Swiss-Prot%3BAcc:A0NGY0]	RTT	4.06321e-65	100
3	AGAP001470	0	Phosphoinositide-dependent kinase 1	U	1.37927e-122	100
3	AGAP001548	0	Stress-associated endoplasmic reticulum protein 2 [Source:VB Community Annotation]	U	3.03944e-13	92.86
3	AGAP001595	RpS29	40S ribosomal protein S29 [Source:VB Community Annotation]	RTT	1.19059e-20	100
3	AGAP001662	0	ADAM-TS Spacer 1	U	4.02654e-79	100
3	AGAP001718	0	Unknown	U	2.07376e-19	85.71
3	AGAP001730	0	cyclin G2 [Source:VB Community Annotation]	D	3.5778e-19	92.86
3	AGAP001797	0	Tropomyosin 1 [Source:VB Community Annotation]	CS	3.79038e-15	96.43
3	AGAP001805	RpL13	60S ribosomal protein L13 [Source:UniProtKB/TrEMBL%3BAcc:Q7PUQ7]	RTT	1.09864e-49	100
3	AGAP001813	0	Histone H3 [Source:UniProtKB/TrEMBL%3BAcc:Q7PUQ8]	RTT	3.93366e-49	100
3	AGAP001874	0	Ras-related protein Rap-1A [Source:VB Community Annotation]	D	7.0163e-09	82.14
3	AGAP001910	RpS3	40S ribosomal protein S3 [Source:VB Community Annotation]	RTT	2.64443e-59	100
3	AGAP001911	RpL6	60S ribosomal protein L6 [Source:VB Community Annotation]	RTT	1.45925e-91	100
3	AGAP001928	0	nucleosome assembly protein 1-like 1 [Source:VB Community Annotation]	D	3.7281e-18	89.29
3	AGAP001971	0	Polyubiquitin-C [Source:VB Community Annotation]	D	1.06813e-30	92.86
3	AGAP002032	0	hypothetical protein, possible vitellogenin	TRP	8.29756e-21	82.14
3	AGAP002063	0	nucleolar protein 56 [Source:VB Community Annotation]	D	7.49677e-23	85.71
3	AGAP002076	0	heat shock 70kDa protein 1/8 [Source:VB Community Annotation]	REDOX/STRESS/MIT	9.49193e-89	100
3	AGAP002122	RpL32	60S ribosomal protein L32 [Source:VB Community Annotation]	RTT	1.05107e-75	100
3	AGAP002182	ABCE1	ATP-binding cassette transporter (ABC transporter) family E member 1 [Source:VB Community Annotation]	TRP	7.97315e-46	85.71
3	AGAP002186	0	very low-density lipoprotein receptor [Source:VB Community Annotation]	TRP	5.11703e-86	100
3	AGAP002306	RpL4	60S ribosomal protein L4 [Source:VB Community Annotation]	RTT	2.2255e-77	100
3	AGAP002346	RpS14-2	40S ribosomal protein S14b [Source:UniProtKB/Swiss-Prot%3BAcc:Q7QBX2]	RTT	1.7927e-46	100
3	AGAP002395	RpL10-2	60S ribosomal protein L10-2 [Source:VB Community Annotation]	RTT	3.78989e-74	100
3	AGAP002401	0	V-type H+-transporting ATPase subunit E [Source:VB Community Annotation]	TRP	4.80875e-26	89.29
3	AGAP002413	0	Basic leucine zipper and W2 domain-containing protein 1 [Source:VB Community Annotation]	RTT	7.6732e-27	92.86
3	AGAP002422	CLIPD1	CLIP-domain serine protease [Source:VB Community Annotation]	I	1.55985e-152	100
3	AGAP002437	RpS8	40S ribosomal protein S8 [Source:UniProtKB/TrEMBL%3BAcc:Q7QC42]	RTT	3.67872e-74	100
3	AGAP002440	Cdc42	cell division cycle Cdc42 homolog [Source:VB Community Annotation]	D	5.47747e-20	89.29
3	AGAP002464	0	secreted ferritin G subunit [Source:VB Community Annotation]	D	2.02352e-111	100
3	AGAP002465	0	ferritin heavy chain [Source:VB Community Annotation]	D	3.80321e-105	100
3	AGAP002468	RpL26	60S ribosomal protein L26 [Source:VB Community Annotation]	RTT	1.78698e-99	100
3	AGAP002594	0	apolipoprotein D [Source:VB Community Annotation]	D	2.10395e-152	100
3	AGAP002599	0	polyubiquitin [Source:VB Community Annotation]	D	9.01521e-101	100
3	AGAP002630	0	NADH dehydrogenase (ubiquinone) 1 beta subcomplex 2 [Source:VB Community Annotation]	REDOX/STRESS/MIT	9.43469e-05	82.14
3	AGAP002667	Tctp	Translationally-controlled tumor protein homolog [Source:UniProtKB/Swiss-Prot%3BAcc:Q7QCK2]	RTT	1.80417e-53	100
3	AGAP002685	APG8	autophagy related gene [Source:VB Community Annotation]	CS	1.44449e-61	100
3	AGAP002754	RpL35a	60S ribosomal protein L35a [Source:VB Community Annotation]	RTT	2.27129e-61	100
3	AGAP002858	0	Sodium/potassium-transporting ATPase subunit alpha [Source:UniProtKB/TrEMBL%3BAcc:F5HKJ1]	TRP	2.3981e-20	92.86
3	AGAP002862	CYP6AA1	cytochrome P450 [Source:VB Community Annotation]	REDOX/STRESS/MIT	1.48933e-55	82.14
3	AGAP002879	0	cathepsin F [Source:VB Community Annotation]	PROT	2.74735e-119	100
3	AGAP002919	RpS6	40S ribosomal protein S6 [Source:VB Community Annotation]	RTT	3.01158e-56	100
3	AGAP002921	RpL36	60S ribosomal protein L36 [Source:UniProtKB/TrEMBL%3BAcc:Q7PQY8]	RTT	6.55196e-71	100
3	AGAP002924	0	Protein tweety homolog [Source:UniProtKB/TrEMBL%3BAcc:F5HKF1]	U	3.57104e-36	100
3	AGAP003021	0	Clathrin heavy chain [Source:UniProtKB/TrEMBL%3BAcc:Q7PQY9]	TRP	2.06815e-13	82.14
3	AGAP003025	RpLp2	60S ribosomal protein LP2 [Source:VB Community Annotation]	RTT	8.24064e-45	100
3	AGAP003069	0	signal peptidase%2C endoplasmic reticulum-type [Source:VB Community Annotation]	D	4.08337e-18	82.14
3	AGAP003119	0	translation initiation factor 1A [Source:VB Community Annotation]	RTT	1.16234e-38	85.71
3	AGAP003277	0	cathepsin D [Source:VB Community Annotation]	PROT	4.94225e-49	82.14
3	AGAP003304	0	CREG/Cellular Repressor of E1A- and JH-stimulated Genes	U	6.12427e-90	96.43
3	AGAP003325	0	NADH dehydrogenase (ubiquinone) 1 alpha subcomplex 4 [Source:VB Community Annotation]	REDOX/STRESS/MIT	5.5927e-27	96.43
3	AGAP003408	0	aldose reductase [Source:VB Community Annotation]	REDOX/STRESS/MIT	1.83621e-56	92.86
3	AGAP003412	RpS28	40S ribosomal protein S28 [Source:VB Community Annotation]	RTT	3.454e-25	100
3	AGAP003430	VhaM8.9	vacuolar H+ ATPase M8.9 accessory subunit [Source:VB Community Annotation]	TRP	5.79025e-34	82.14
3	AGAP003532	RpS3a	40S ribosomal protein S3a [Source:UniProtKB/Swiss-Prot%3BAcc:P52813]	RTT	7.18997e-88	100
3	AGAP003538	RpL36a	60S ribosomal protein L36a [Source:VB Community Annotation]	RTT	6.87635e-59	100
3	AGAP003556	RpL3	60S ribosomal protein L3 [Source:VB Community Annotation]	RTT	5.95993e-58	100
3	AGAP003578	0	aldehyde dehydrogenase (NAD+) [Source:VB Community Annotation]	M	2.45305e-46	89.29
3	AGAP003588	VATH	V-type H+-transporting ATPase subunit H [Source:VB Community Annotation]	TRP	1.55018e-15	82.14
3	AGAP003592	RpLP0	60S ribosomal protein LP0 [Source:VB Community Annotation]	RTT	5.3578e-66	100
3	AGAP003663	0	ATP-dependent RNA helicase DBP2 [Source:VB Community Annotation]	RTT	8.54101e-43	96.43
3	AGAP003711	0	V-type H+-transporting ATPase subunit I [Source:VB Community Annotation]	TRP	1.67931e-29	89.29
3	AGAP003721	ANXB10B	annexin B10B [Source:VB Community Annotation]	CS	3.457e-40	89.29
3	AGAP003767	0	Ecdysteroid kinase	D	3.69099e-60	92.86
3	AGAP003768	RpS2	40S ribosomal protein S2 [Source:VB Community Annotation]	RTT	1.40691e-60	100
3	AGAP003816	RpL30	60S ribosomal protein L30 [Source:VB Community Annotation]	RTT	2.88768e-38	100
3	AGAP003878	0	LRR TM	U	2.07197e-46	89.29
3	AGAP003893	0	C-terminal-binding protein [Source:VB Community Annotation]	D	2.71879e-22	96.43
3	AGAP003914	0	Unknown	D	1.33481e-07	92.86
3	AGAP004016	0	Leucine-rich repeats (LRRs)	U	3.18608e-107	100
3	AGAP004017	0	Leucine rich repeat (LRR)	I	7.42445e-133	100
3	AGAP004031	0	mitochondrial electron transfer flavoprotein subunit alpha [Source:VB Community Annotation]	REDOX/STRESS/MIT	1.44905e-42	92.86
3	AGAP004098	0	GTP-binding protein SAR1 [Source:VB Community Annotation]	D	2.93099e-40	85.71
3	AGAP004146	0	Ras-related protein Rab-1A [Source:VB Community Annotation]	D	5.20144e-36	92.86
3	AGAP004164	GSTD1-4	glutathione S-transferase delta class 1 [Source:VB Community Annotation]	REDOX/STRESS/MIT	2.52054e-05	85.71
3	AGAP004212	Crc	calreticulin [Source:VB Community Annotation]	TRP	1.77539e-39	92.86
3	AGAP004247	GPXH1	glutathione peroxidase 1 [Source:VB Community Annotation]	REDOX/STRESS/MIT	5.75959e-26	85.71
3	AGAP004349	0	K homology RNA-binding domain	U	7.09005e-71	100
3	AGAP004395	0	nucleophosmin 3 [Source:VB Community Annotation]	D	8.29839e-19	92.86
3	AGAP004400	0	CYTC oxidase, subunit 8	U	4.58727e-05	92.86
3	AGAP004422	RpL19	60S ribosomal protein L19 [Source:VB Community Annotation]	RTT	5.46258e-67	100
3	AGAP004428	0	Midline fasciclin [Source:VB Community Annotation]	D	2.11928e-38	82.14
3	AGAP004462	RpS25	40S ribosomal protein S25 [Source:VB Community Annotation]	RTT	1.08546e-43	100
3	AGAP004533	0	cathepsin B [Source:VB Community Annotation]	PROT	4.79568e-70	96.43
3	AGAP004750	0	translation initiation factor 4G [Source:VB Community Annotation]	RTT	0.000132336	85.71
3	AGAP004887	RpS17	40S ribosomal protein S17 [Source:UniProtKB/Swiss-Prot%3BAcc:Q9U9L1]	RTT	1.4553e-79	100
3	AGAP004919	RpL15	60S ribosomal protein L15 [Source:UniProtKB/Swiss-Prot%3BAcc:P52818]	RTT	2.97461e-60	100
3	AGAP004936	0	EGF repeats	D	2.2212e-115	100
3	AGAP004944	0	heat shock 70kDa protein 1/8 [Source:VB Community Annotation]	REDOX/STRESS/MIT	8.25252e-08	82.14
3	AGAP004993	0	laminin subunit alpha [Source:VB Community Annotation]	CS	1.21088e-55	100
3	AGAP005046	RpL22	60S ribosomal protein L22 [Source:VB Community Annotation]	RTT	1.27859e-58	100
3	AGAP005061	RpS9	40S ribosomal protein S9 [Source:VB Community Annotation]	RTT	1.97074e-44	100
3	AGAP005131	RpS24	40S ribosomal protein S24 [Source:UniProtKB/TrEMBL%3BAcc:Q7PQ02]	RTT	1.21898e-69	100
3	AGAP005134	0	F-type H+-transporting ATPase subunit alpha [Source:VB Community Annotation]	TRP	2.67437e-28	92.86
3	AGAP005427	RpL28	60S ribosomal protein L28 [Source:VB Community Annotation]	RTT	1.11538e-65	100
3	AGAP005504	0	phospholipid scramblase 1 [Source:VB Community Annotation]	D	1.34955e-34	96.43
3	AGAP005558	0	peptidase (mitochondrial processing) beta [Source:VB Community Annotation]	REDOX/STRESS/MIT	2.68715e-30	82.14
3	AGAP005608	0	NUCB1	D	3.81291e-38	82.14
3	AGAP005611	0	Unknown	U	8.07322e-75	100
3	AGAP005618	0	1%2C2-dihydroxy-3-keto-5-methylthiopentene dioxygenase [Source:UniProtKB/TrEMBL%3BAcc:Q7Q6X6]	D	2.98312e-25	82.14
3	AGAP005625	SCRASP1	Class A Scavenger Receptor (SRCR domain) with Serine Protease domain. [Source:VB Community Annotation]	I	7.70619e-56	92.86
3	AGAP005674	0	Miple [Source:VB Community Annotation]	U	9.21828e-94	100
3	AGAP005802	RpL8	60S ribosomal protein L8 [Source:UniProtKB/Swiss-Prot%3BAcc:Q9U9L2]	RTT	7.24255e-96	100
3	AGAP005820	0	Unknown	U	3.90767e-51	85.71
3	AGAP005849	0	colmedin [Source:VB Community Annotation]	CS	3.06204e-57	96.43
3	AGAP005865	0	fumarylacetoacetase [Source:VB Community Annotation]	M	2.64493e-17	82.14
3	AGAP005947	RpS13	40S ribosomal protein S13 [Source:UniProtKB/Swiss-Prot%3BAcc:P52811]	RTT	5.38831e-80	100
3	AGAP005960	RpL7a	60S ribosomal protein L7a [Source:UniProtKB/Swiss-Prot%3BAcc:O76732]	RTT	8.35868e-83	100
3	AGAP005991	RpL14	60S ribosomal protein L14 [Source:VB Community Annotation]	RTT	2.02298e-63	100
3	AGAP006037	RpL24	60S ribosomal protein L24 [Source:VB Community Annotation]	RTT	7.14803e-83	100
3	AGAP006068	0	DUF229	U	2.7521e-56	100
3	AGAP006216	GPRMTH2	methuselah receptor 2 [Source:VB Community Annotation]	D	8.95243e-33	82.14
3	AGAP006278	0	Odorant-binding protein 99a - Drosophila melanogaster	CSR	7.70764e-72	96.43
3	AGAP006459	SUI1	Protein translation factor SUI1 homolog [Source:UniProtKB/Swiss-Prot%3BAcc:P42678]	D	1.134e-66	100
3	AGAP006612	RpL29	60S ribosomal protein L29 [Source:VB Community Annotation]	RTT	1.80959e-40	100
3	AGAP006614	0	transcription factor BTF3 homolog 4 [Source:VB Community Annotation]	RTT	2.1415e-21	100
3	AGAP006745	0	Ninjurin	I	3.4525e-29	82.14
3	AGAP006766	0	nascent polypeptide-associated complex subunit alpha [Source:VB Community Annotation]	U	4.01169e-28	96.43
3	AGAP006782	0	ADP%2CATP carrier protein 1 [Source:VB Community Annotation]	TRP	2.27447e-50	100
3	AGAP006871	RpS4	40S ribosomal protein S4 [Source:UniProtKB/TrEMBL%3BAcc:Q7PT95]	RTT	1.92972e-72	100
3	AGAP006879	0	F-type H+-transporting ATPase subunit e [Source:VB Community Annotation]	TRP	3.91741e-13	92.86
3	AGAP006921	0	CED6	U	2.08553e-42	89.29
3	AGAP006944	eIF3e	Eukaryotic translation initiation factor 3 subunit E [Source:UniProtKB/Swiss-Prot%3BAcc:Q7QIL8]	RTT	2.36615e-27	85.71
3	AGAP006958	Hsp83	Heat shock protein 83 [Source:UniProtKB/Swiss-Prot%3BAcc:Q7PT10]	REDOX/STRESS/MIT	5.24549e-17	96.43
3	AGAP006959	0	molecular chaperone HtpG [Source:VB Community Annotation]	REDOX/STRESS/MIT	8.21918e-13	89.29
3	AGAP007055	0	sodium-dependent dicarboxylate transporter sdcS [Source:VB Community Annotation]	TRP	9.55935e-36	89.29
3	AGAP007087	RpL41	60s ribosomal protein L41 [Source:UniProtKB/TrEMBL%3BAcc:Q52P89]	RTT	1.80914e-52	100
3	AGAP007088	0	peptidyl-prolyl cis-trans isomerase B (cyclophilin B) [Source:VB Community Annotation]	D	1.49984e-52	100
3	AGAP007120	0	nucleoside-diphosphate kinase [Source:VB Community Annotation]	D	1.21781e-41	100
3	AGAP007131	0	AP-2 complex subunit mu-1 [Source:VB Community Annotation]	TRP	7.26403e-24	89.29
3	AGAP007157	RpS27	40S ribosomal protein S27 [Source:UniProtKB/TrEMBL%3BAcc:Q7PT96]	RTT	5.79666e-59	100
3	AGAP007209	0	Tetraspanin [Source:UniProtKB/TrEMBL%3BAcc:Q7PTA7]	D	9.27188e-50	96.43
3	AGAP007237	HPX4	heme peroxidase 4 [Source:VB Community Annotation]	I	3.16809e-81	96.43
3	AGAP007312	0	Unknown	U	1.35786e-80	100
3	AGAP007366	0	Uncharacterised protein family, CD034/YQF4	U	2.60368e-35	96.43
3	AGAP007393	0	protein disulfide isomerase family A%2C member 3 [Source:VB Community Annotation]	D	1.1005e-79	96.43
3	AGAP007406	0	Elongation factor 1-alpha [Source:UniProtKB/TrEMBL%3BAcc:Q7PT29]	RTT	2.02285e-63	100
3	AGAP007580	RpL18	60S ribosomal protein L18 [Source:UniProtKB/Swiss-Prot%3BAcc:Q7QJM5]	RTT	2.51899e-84	100
3	AGAP007609	0	DAZ associated protein 2	U	9.16139e-107	100
3	AGAP007621	0	cytochrome c oxidase VIIc [Source:VB Community Annotation]	REDOX/STRESS/MIT	2.18324e-05	96.43
3	AGAP007629	LANB2	laminin gamma 1 [Source:VB Community Annotation]	CS	5.56638e-81	100
3	AGAP007638	0	oligosaccharyltransferase complex subunit delta (ribophorin II) [Source:VB Community Annotation]	D	5.22903e-47	85.71
3	AGAP007643	0	Tyrosine 3-monooxygenase/tryptophan 5-monooxygenase activation protein%2C beta polypeptide 2 [Source:VB Community Annotation]	D	2.79753e-21	96.43
3	AGAP007699	0	GTP-binding nuclear protein Ran [Source:VB Community Annotation]	D	1.2826e-32	89.29
3	AGAP007721	0	Synaptobrevin	TRP	3.79616e-07	82.14
3	AGAP007740	RpLP1	60S ribosomal protein LP1 [Source:VB Community Annotation]	RTT	1.71214e-79	100
3	AGAP007841	0	F-type H+-transporting ATPase subunit delta [Source:VB Community Annotation]	TRP	2.68044e-17	92.86
3	AGAP007901	0	Ras-related protein Rab-5C [Source:VB Community Annotation]	D	2.29061e-24	85.71
3	AGAP007927	RpL40	60S ribosomal protein L40 [Source:VB Community Annotation]	RTT	3.47589e-42	100
3	AGAP007957	0	choline/ethanolamine kinase [Source:VB Community Annotation]	M	1.86692e-52	92.86
3	AGAP007966	0	F-type H+-transporting ATPase subunit gamma [Source:VB Community Annotation]	TRP	2.37868e-34	89.29
3	AGAP008000	0	sepiapterin reductase [Source:VB Community Annotation]	REDOX/STRESS/MIT	2.19999e-18	89.29
3	AGAP008004	0	Unknown	U	1.27279e-17	82.14
3	AGAP008075	0	cellular nucleic acid-binding protein [Source:VB Community Annotation]	D	5.83882e-29	100
3	AGAP008329	RpS5	40S ribosomal protein S5 [Source:VB Community Annotation]	RTT	2.33781e-77	100
3	AGAP008482	0	chromodomain-helicase-DNA-binding protein 7 [Source:VB Community Annotation]	RTT	0.000134988	85.71
3	AGAP008521	0	low density lipoprotein receptor adapter protein 1 [Source:VB Community Annotation]	TRP	1.22162e-36	85.71
3	AGAP008527	0	CD63 antigen [Source:VB Community Annotation]	D	6.30862e-36	82.14
3	AGAP008632	0	alpha-aminoadipic semialdehyde synthase [Source:VB Community Annotation]	REDOX/STRESS/MIT	1.02245e-44	89.29
3	AGAP008699	0	Unknown	U	0.00137353	82.14
3	AGAP008724	0	mitochondrial cytochrome c oxidase subunit 5B isoform 1 [Source:VB Community Annotation]	REDOX/STRESS/MIT	2.0658e-08	85.71
3	AGAP008727	0	cytochrome c oxidase subunit 4%2C mitochondrial precursor [Source:VB Community Annotation]	REDOX/STRESS/MIT	5.83279e-20	96.43
3	AGAP008762	0	DNA binding	RTT	2.54628e-38	92.86
3	AGAP008822	0	FK506-binding protein 14 [Source:VB Community Annotation]	U	1.15491e-42	89.29
3	AGAP008909	0	phosphatidylethanolamine binding	D	3.80396e-16	96.43
3	AGAP008916	RpL7	60S ribosomal protein L7 [Source:VB Community Annotation]	RTT	1.47814e-76	100
3	AGAP008955	0	ubiquinol-cytochrome c reductase iron-sulfur subunit [Source:VB Community Annotation]	D	2.61065e-24	85.71
3	AGAP009031	RpL5	60S ribosomal protein L5 [Source:VB Community Annotation]	RTT	1.87669e-77	100
3	AGAP009156	0	BRICHOS domain	D	6.84466e-19	100
3	AGAP009200	0	collagen type IV alpha [Source:VB Community Annotation]	CS	3.97199e-106	100
3	AGAP009201	0	collagen type IV alpha [Source:VB Community Annotation]	CS	1.29603e-90	100
3	AGAP009324	RpL34	60S ribosomal protein L34 [Source:VB Community Annotation]	RTT	3.62072e-73	100
3	AGAP009431	RpS21	40S ribosomal protein S21 [Source:UniProtKB/TrEMBL%3BAcc:Q7PTN4]	RTT	5.45936e-44	100
3	AGAP009441	0	elongation factor 2 [Source:VB Community Annotation]	RTT	3.21241e-56	100
3	AGAP009443	0	excitatory amino acid transporter 3 [Source:VB Community Annotation]	TRP	5.40616e-13	85.71
3	AGAP009493	alpha9	nicotinic acetylcholine receptor subunit alpha 9 [Source:VB Community Annotation]	TRP	5.20323e-90	96.43
3	AGAP009508	RpL9	60S ribosomal protein L9 [Source:VB Community Annotation]	RTT	7.64873e-86	100
3	AGAP009537	0	cytochrome c [Source:VB Community Annotation]	REDOX/STRESS/MIT	4.86072e-08	89.29
3	AGAP009572	RpS15a-2	40S ribosomal protein S15a [Source:VB Community Annotation]	RTT	2.14923e-31	100
3	AGAP009584	TRX1	Thioredoxin [Source:UniProtKB/TrEMBL%3BAcc:Q9NGZ1]	REDOX/STRESS/MIT	2.73253e-18	100
3	AGAP009621	0	alpha-N-acetylgalactosaminidase [Source:VB Community Annotation]	D	2.73158e-56	96.43
3	AGAP009651	0	CD63 antigen [Source:VB Community Annotation]	D	1.28589e-40	92.86
3	AGAP009668	0	lysosomal-associated membrane protein 1/2 [Source:VB Community Annotation]	D	3.93893e-111	100
3	AGAP009670	SRPN4	serine protease inhibitor (serpin) 4 [Source:VB Community Annotation]	I	1.95956e-72	96.43
3	AGAP009861	0	Profilin protein [Source:VB Community Annotation]	CS	2.4821e-41	100
3	AGAP009863	0	eukaryotic translation initiation factor 4A%2C isoform 2 [Source:VB Community Annotation]	RTT	5.15333e-98	100
3	AGAP009920	RpL37a	60S ribosomal protein L37a [Source:VB Community Annotation]	RTT	2.39639e-69	100
3	AGAP009998	RpS11	40S ribosomal protein S11 [Source:UniProtKB/Swiss-Prot%3BAcc:P52812]	RTT	5.53193e-59	100
3	AGAP010065	RpL12	60S ribosomal protein L12 [Source:VB Community Annotation]	RTT	1.08544e-71	100
3	AGAP010131	0	ornithine decarboxylase antizyme 1 [Source:VB Community Annotation]	M	4.53409e-54	96.43
3	AGAP010133	SCRBQ2	Class B Scavenger Receptor (CD36 domain). [Source:VB Community Annotation]	I	7.31619e-24	89.29
3	AGAP010163	RpL38	60S ribosomal protein L38 [Source:UniProtKB/Swiss-Prot%3BAcc:Q7Q0U1]	RTT	1.48646e-68	100
3	AGAP010172	0	protein phosphatase 2 (formerly 2A)%2C catalytic subunit [Source:VB Community Annotation]	D	1.14519e-12	82.14
3	AGAP010173	Rack1	guanine nucleotide-binding protein subunit beta-like protein [Source:VB Community Annotation]	D	2.29514e-40	100
3	AGAP010216	RpL25	60S ribosomal protein L25 [Source:VB Community Annotation]	RTT	1.57836e-58	100
3	AGAP010225	0	ER lumen protein retaining receptor [Source:VB Community Annotation]	TRP	3.15175e-18	89.29
3	AGAP010252	RpL23	60S ribosomal protein L23 [Source:VB Community Annotation]	RTT	7.87678e-69	100
3	AGAP010257	RpL13a	60S ribosomal protein L13a [Source:VB Community Annotation]	RTT	2.65654e-60	100
3	AGAP010337	0	ubiquinol-cytochrome c reductase subunit 8 [Source:VB Community Annotation]	D	8.78011e-15	92.86
3	AGAP010347	CuSOD3	copper-zinc superoxide dismutase 3 [Source:VB Community Annotation]	REDOX/STRESS/MIT	4.06416e-38	100
3	AGAP010392	0	calumenin [Source:VB Community Annotation]	U	6.53881e-59	96.43
3	AGAP010445	0	Rab11 family-interacting protein 3/4 [Source:VB Community Annotation]	D	8.34654e-19	85.71
3	AGAP010510	0	Tubulin beta chain [Source:UniProtKB/TrEMBL%3BAcc:Q7PPR6]	CS	1.07409e-28	92.86
3	AGAP010553	0	poly(U)-binding-splicing factor PUF60 [Source:VB Community Annotation]	D	1.18766e-15	85.71
3	AGAP010580	0	Farnesoic acid 0-methyl transferase	M	7.73262e-74	100
3	AGAP010589	0	guanine nucleotide-binding protein subunit gamma [Source:VB Community Annotation]	D	2.24427e-33	89.29
3	AGAP010591	RpS20	40S ribosomal protein S20 [Source:VB Community Annotation]	RTT	4.18012e-56	100
3	AGAP010592	S7	40S ribosomal protein S7 [Source:UniProtKB/Swiss-Prot%3BAcc:P33514]	RTT	1.13649e-85	100
3	AGAP010608	0	Clathrin light chain [Source:UniProtKB/TrEMBL%3BAcc:Q5TSE5]	TRP	1.84229e-19	92.86
3	AGAP010612	0	elongation factor 1-beta [Source:VB Community Annotation]	RTT	8.81887e-19	96.43
3	AGAP010727	0	Mucin	U	1.56646e-53	100
3	AGAP010929	tubB	Tubulin beta chain [Source:UniProtKB/TrEMBL%3BAcc:Q7PSI4]	CS	9.78141e-13	85.71
3	AGAP010933	RpS19	40S ribosomal protein S19 [Source:VB Community Annotation]	RTT	3.25166e-85	100
3	AGAP010957	0	calmodulin [Source:VB Community Annotation]	D	8.72968e-26	96.43
3	AGAP011034	0	Odz%2C odd Oz/ten-m homolog 1 [Source:VB Community Annotation]	D	4.13774e-42	100
3	AGAP011050	0	aldehyde reductase [Source:VB Community Annotation]	REDOX/STRESS/MIT	1.3909e-36	82.14
3	AGAP011054	TPX2	thioredoxin peroxidase 2 [Source:VB Community Annotation]	I	2.22925e-44	92.86
3	AGAP011076	0	ubiquitin-conjugating enzyme E2 I [Source:VB Community Annotation]	D	1.30575e-26	96.43
3	AGAP011077	RpS12	40S ribosomal protein S12 [Source:UniProtKB/TrEMBL%3BAcc:Q7PSP8]	RTT	5.79892e-47	100
3	AGAP011092	0	Polyadenylate-binding protein [Source:UniProtKB/TrEMBL%3BAcc:Q7QH99]	D	2.58084e-34	100
3	AGAP011119	0	Lysozyme, I type	I	2.34788e-44	89.29
3	AGAP011131	0	F-type H+-transporting ATPase subunit d [Source:VB Community Annotation]	TRP	2.32022e-15	89.29
3	AGAP011159	CoVa	cytochrome c oxidase subunit Va [Source:VB Community Annotation]	REDOX/STRESS/MIT	1.72033e-18	89.29
3	AGAP011166	0	protein phosphatase 1%2C catalytic subunit [Source:VB Community Annotation]	D	7.06513e-24	82.14
3	AGAP011173	RpL11	60S ribosomal protein L11 [Source:VB Community Annotation]	RTT	2.1175e-81	100
3	AGAP011197	FBN9	FBN9	I	1.28994e-30	96.43
3	AGAP011228	0	FBN2	I	3.23876e-30	100
3	AGAP011284	0	Eukaryotic translation initiation factor 5A [Source:UniProtKB/TrEMBL%3BAcc:Q7PSR5]	RTT	2.06443e-79	100
3	AGAP011298	RpL10a	60S ribosomal protein L10a [Source:VB Community Annotation]	RTT	1.01222e-61	100
3	AGAP011317	0	Unknown	U	9.26075e-33	85.71
3	AGAP011334	0	Failed axon connections protein [Source:VB Community Annotation]	D	1.77402e-22	85.71
3	AGAP011424	RpS16	40S ribosomal protein S16 [Source:VB Community Annotation]	RTT	3.39709e-82	100
3	AGAP011687	RpL27	60S ribosomal protein L27 [Source:UniProtKB/TrEMBL%3BAcc:Q5TMJ9]	RTT	1.35782e-72	100
3	AGAP011706	RpL27a	60S ribosomal protein L27a [Source:VB Community Annotation]	RTT	3.93323e-69	100
3	AGAP011777	RpSA	40S ribosomal protein SA [Source:UniProtKB/Swiss-Prot%3BAcc:Q7PZ81]	RTT	1.33136e-77	100
3	AGAP011802	RpL39	60S ribosomal protein L39 [Source:VB Community Annotation]	RTT	8.4591e-42	100
3	AGAP011828	Cp1	cathepsin L [Source:VB Community Annotation]	PROT	1.99455e-130	100
3	AGAP011832	0	Death-associated protein 1 [Source:VB Community Annotation]	D	3.42648e-24	82.14
3	AGAP011896	RpL31	60S ribosomal protein L31 [Source:VB Community Annotation]	RTT	2.03258e-50	100
3	AGAP011940	0	sphingomyelin phosphodiesterase [Source:VB Community Annotation]	M	3.25739e-131	100
3	AGAP011974	SCRC1	Class C Scavenger Receptor (Sushi/SCR/CCP and Somatomedin B domains). [Source:VB Community Annotation]	I	6.21203e-153	100
3	AGAP011984	0	UDP-N-acetyl-alpha-D-galactosamine:polypeptide N-acetylgalactosaminyltransferase 20 [Source:VB Community Annotation]	M	9.06564e-41	85.71
3	AGAP012014	Arf1	ADP-ribosylation factor 1 [Source:VB Community Annotation]	D	3.20092e-26	92.86
3	AGAP012053	0	alpha%2Calpha-trehalase [Source:VB Community Annotation]	M	2.11504e-62	96.43
3	AGAP012056	0	cofilin [Source:VB Community Annotation]	CS	6.55437e-23	92.86
3	AGAP012100	RpS26	40S ribosomal protein S26 [Source:UniProtKB/Swiss-Prot%3BAcc:Q9GT45]	RTT	1.97358e-77	100
3	AGAP012138	RpL21	60S ribosomal protein L21 [Source:VB Community Annotation]	RTT	5.407e-84	100
3	AGAP012184	0	FK506-binding protein 1 [Source:VB Community Annotation]	U	1.47832e-41	100
3	AGAP012284	RpL18a-1	60S ribosomal protein L18a [Source:UniProtKB/TrEMBL%3BAcc:Q7PV82]	RTT	2.69721e-83	100
3	AGAP012307	0	Spondin-1 [Source:VB Community Annotation]	D	4.08638e-136	100
3	AGAP012334	0	high mobility group protein D%2C isoform C [Source:VB Community Annotation]	D	5.30906e-26	100
3	AGAP012386	Nim C2	Nimrod C2	I	4.57718e-36	85.71
3	AGAP012407	0	protein disulfide-isomerase A1 [Source:VB Community Annotation]	D	2.88806e-80	100
3	AGAP012418	0	Unknown	U	6.2019e-08	100
3	AGAP012515	0	F-type H+-transporting ATPase subunit f [Source:VB Community Annotation]	TRP	4.00006e-13	96.43
3	AGAP012674	0	Unknown	U	2.26655e-34	85.71
3	AGAP012708	0	Unknown	RTT	9.64651e-05	96.43
3	AGAP012755	0	ER lumen protein retaining receptor [Source:VB Community Annotation]	TRP	2.97211e-13	82.14
3	AGAP012813	0	Unknown	D	7.04232e-80	82.14
3	AGAP012956	0	Unknown	U	3.92793e-41	100
3	AGAP012990	RpS23	40S ribosomal protein S23 [Source:VB Community Annotation]	RTT	7.80295e-51	100
3	AGAP013092	0	cytochrome c oxidase subunit VIb polypeptide 1 [Source:VB Community Annotation]	REDOX/STRESS/MIT	2.85811e-12	89.29
3	AGAP013103	0	Anopheles-specific TM protein	U	8.93298e-37	100
3	AGAP013333	0	Phosphate carrier%2C mitochondrial [Source:VB Community Annotation]	U	2.10612e-36	96.43
3	AGAP013509	0	carboxylesterase clade H%2C member 1 [Source:VB Community Annotation]	REDOX/STRESS/MIT	6.02071e-130	100
3	AGAP013742	0	40S ribosomal protein S27a [Source:VB Community Annotation]	RTT	2.53325e-68	100
3	AGAP013773	0	Coiled-coil domain containing protein 32	U	2.94449e-11	85.71
3	AGAP028015	0	LRR	U	6.64617e-09	92.86
3	AGAP028028	LRIM16A	leucine-rich immune protein (TM) [Source:VB Community Annotation]	I	1.83173e-112	100
3	AGAP028038	0	Tetratricopeptide repeat domain	D	1.94791e-51	82.14
3	AGAP028064	LRIM16B	leucine-rich immune protein (TM) [Source:VB Community Annotation]	I	7.1131e-61	96.43
3	AGAP028108	0	Niemann-Pick type C2 (Npc2) is a lysosomal protein in which a mutation in the gene causes a rare form of Niemann-Pick type C disease	I	3.49342e-12	85.71
3	AGAP028154	0	V-type proton ATPase proteolipid subunit [Source:UniProtKB/TrEMBL%3BAcc:A0A1S4HCY4]	TRP	2.31348e-53	100
3	AGAP028157	0	Unknown	U	6.01353e-22	92.86
3	AGAP028439	0	Unknown	U	8.59866e-40	89.29
3	AGAP028464	0	Unknown	U	4.89613e-34	100
3	AGAP028693	RpS18	40S ribosomal protein S18 [Source:VB Community Annotation]	RTT	3.4512e-59	100
3	AGAP028876	SSU_rRNA_eukarya	Eukaryotic small subunit ribosomal RNA [Source:RFAM%3BAcc:RF01960]	RTT	2.09486e-05	85.71
3	AGAP029038	SSU_rRNA_eukarya	Eukaryotic small subunit ribosomal RNA [Source:RFAM%3BAcc:RF01960]	RTT	1.27791e-05	100
3	AGAP029054	NimB2	nimrod B2 [Source:VB Community Annotation]	I	2.03407e-152	100
3	AGAP029055	eater	Eater	I	7.78263e-63	100
4	AGAP000005	0	high mobility group protein B1 [Source:VB Community Annotation]	D	3.7654e-11	80.85
4	AGAP000044	0	thioredoxin domain-containing protein [Source:VB Community Annotation]	D	3.18204e-25	85.11
4	AGAP000109	0	cytochrome c oxidase subunit VIIa [Source:VB Community Annotation]	REDOX/STRESS/MIT	2.36264e-19	93.62
4	AGAP000145	0	ubiquitin-conjugating enzyme E2D [Source:VB Community Annotation]	D	8.63311e-09	80.85
4	AGAP000170	0	NADH dehydrogenase (ubiquinone) Fe-S protein 7 [Source:VB Community Annotation]	REDOX/STRESS/MIT	5.02649e-18	80.85
4	AGAP000235	0	Thymosin [Source:VB Community Annotation]	CS	3.20675e-18	95.74
4	AGAP000249	0	mannosyl-glycoprotein endo-beta-N-acetylglucosaminidase [Source:VB Community Annotation]	M	2.57501e-84	95.74
4	AGAP000268	0	Unknown	U	2.81793e-75	93.62
4	AGAP000305	0	SPARC [Source:VB Community Annotation]	D	1.55885e-204	100
4	AGAP000358	0	Selenoprotein SelK/SelG	U	1.06656e-30	82.98
4	AGAP000375	0	Coiled-coil-helix-coiled-coil-helix domain-containing protein 3, mitochondrial	U	1.52252e-28	80.85
4	AGAP000376	Tsf1	transferrin 1	I	5.52159e-79	100
4	AGAP000385	0	Unknown	U	3.67476e-61	91.49
4	AGAP000399	0	squid [Source:VB Community Annotation]	RTT	5.31943e-14	85.11
4	AGAP000415	0	5-hydroxyisourate hydrolase [Source:VB Community Annotation]	D	1.28843e-28	97.87
4	AGAP000462	0	peptidyl-prolyl isomerase F (cyclophilin D) [Source:VB Community Annotation]	D	1.07066e-80	100
4	AGAP000523	0	F-type H+-transporting ATPase subunit c [Source:VB Community Annotation]	TRP	3.98111e-35	97.87
4	AGAP000526	0	translation initiation factor 4B [Source:VB Community Annotation]	RTT	3.76593e-07	82.98
4	AGAP000541	RpS15a-1	40S ribosomal protein S15a [Source:VB Community Annotation]	RTT	5.97969e-68	100
4	AGAP000565	TRXR	thioredoxin reductase [Source:VB Community Annotation]	REDOX/STRESS/MIT	1.22964e-34	93.62
4	AGAP000618	0	succinate dehydrogenase (ubiquinone) membrane anchor subunit [Source:VB Community Annotation]	TRP	1.44832e-29	85.11
4	AGAP000651	Actin5C	Actin-5C [Source:UniProtKB/Swiss-Prot%3BAcc:P84185]	CS	2.43164e-70	100
4	AGAP000654	RpS30	40S ribosomal protein S30 [Source:UniProtKB/TrEMBL%3BAcc:Q7QEH2]	RTT	2.2476e-90	100
4	AGAP000655	RpS14-1	40S ribosomal protein S14a [Source:UniProtKB/Swiss-Prot%3BAcc:Q7QEH1]	RTT	4.68151e-84	100
4	AGAP000669	0	Unknown	U	3.54297e-14	93.62
4	AGAP000679	0	Aminoacylase [Source:UniProtKB/TrEMBL%3BAcc:Q7QEF5]	PROT	2.17098e-19	85.11
4	AGAP000719	Ahcy13	Adenosylhomocysteinase [Source:UniProtKB/Swiss-Prot%3BAcc:O76757]	D	1.07695e-36	87.23
4	AGAP000739	RpS10	40S ribosomal protein S10 [Source:VB Community Annotation]	RTT	2.24824e-99	100
4	AGAP000790	0	Calycin-like	U	8.22795e-158	100
4	AGAP000794	0	NADH dehydrogenase (ubiquinone) Fe-S protein 2 [Source:VB Community Annotation]	REDOX/STRESS/MIT	3.80967e-34	80.85
4	AGAP000804	GPXH2	glutathione peroxidase 2 [Source:VB Community Annotation]	REDOX/STRESS/MIT	8.24912e-106	97.87
4	AGAP000807	0	helix-loop-helix transcription factor [Source:VB Community Annotation]	RTT	8.01407e-60	100
4	AGAP000849	0	NADH dehydrogenase (ubiquinone) 1 beta subcomplex 1 [Source:VB Community Annotation]	REDOX/STRESS/MIT	2.95348e-18	93.62
4	AGAP000851	0	cytochrome c oxidase subunit 6a%2C mitochrondrial [Source:VB Community Annotation]	REDOX/STRESS/MIT	1.40855e-32	93.62
4	AGAP000852	0	Small ubiquitin-related modifier [Source:UniProtKB/TrEMBL%3BAcc:Q7PNJ2]	D	9.03802e-48	97.87
4	AGAP000883	0	elongation factor 1-gamma [Source:VB Community Annotation]	RTT	1.39008e-64	100
4	AGAP000900	0	protein-tyrosine sulfotransferase [Source:VB Community Annotation]	D	2.30181e-06	80.85
4	AGAP000927	0	myosin regulatory light chain%2C invertebrate [Source:VB Community Annotation]	CS	5.57336e-66	97.87
4	AGAP000952	RpL37	60S ribosomal protein L37 [Source:VB Community Annotation]	RTT	2.6043e-103	100
4	AGAP000953	RpL10-1	60S ribosomal protein L10-1 [Source:VB Community Annotation]	RTT	3.0576e-99	100
4	AGAP000964	0	3TM protein	U	5.5058e-31	82.98
4	AGAP001064	0	Transmembrane emp24 domain-containing protein 10 precursor [Source:VB Community Annotation]	TRP	6.20083e-42	95.74
4	AGAP001069	0	SURF-4	TRP	5.85789e-21	91.49
4	AGAP001082	0	saposin [Source:VB Community Annotation]	D	1.03724e-36	93.62
4	AGAP001138	0	F-type H+-transporting ATPase subunit b [Source:VB Community Annotation]	TRP	7.9172e-28	95.74
4	AGAP001151	0	14-3-3 protein epsilon [Source:VB Community Annotation]	D	7.22218e-41	97.87
4	AGAP001218	0	tubulin alpha-4A chain [Source:VB Community Annotation]	CS	1.23963e-09	87.23
4	AGAP001219	TUB4A	tubulin alpha-4A chain [Source:VB Community Annotation]	CS	3.29177e-25	85.11
4	AGAP001256	0	3'-phosphoadenosine 5'-phosphosulfate synthase [Source:VB Community Annotation]	D	3.31258e-28	87.23
4	AGAP001264	0	Plasma glutamate carboxypeptidase [Source:VB Community Annotation]	PROT	8.88429e-44	93.62
4	AGAP001274	RpS15	40S ribosomal protein S15 [Source:VB Community Annotation]	RTT	7.03779e-94	100
4	AGAP001325	0	peroxiredoxin 5%2C atypical 2-Cys peroxiredoxin [Source:VB Community Annotation]	REDOX/STRESS/MIT	2.03945e-29	87.23
4	AGAP001367	0	beta-1%2C3-glucuronyltransferase [Source:VB Community Annotation]	M	5.75042e-25	89.36
4	AGAP001372	0	MAP Jupiter	U	7.25744e-21	91.49
4	AGAP001380	0	translation initiation factor 6 [Source:VB Community Annotation]	RTT	2.41061e-42	85.11
4	AGAP001381	0	laminin%2C beta 1 [Source:VB Community Annotation]	CS	1.10491e-114	100
4	AGAP001387	0	Unknown	U	3.33941e-09	97.87
4	AGAP001408	RpL35	60S ribosomal protein L35 [Source:VB Community Annotation]	RTT	3.91637e-85	100
4	AGAP001419	0	RNA recognition motif domain	RTT	6.36723e-09	80.85
4	AGAP001459	RpL17	60S ribosomal protein L17 [Source:UniProtKB/Swiss-Prot%3BAcc:A0NGY0]	RTT	4.12185e-103	100
4	AGAP001470	0	Phosphoinositide-dependent kinase 1	U	1.87587e-117	100
4	AGAP001502	0	mitochondrial 10 kDa heat shock protein [Source:VB Community Annotation]	REDOX/STRESS/MIT	6.62227e-49	95.74
4	AGAP001548	0	Stress-associated endoplasmic reticulum protein 2 [Source:VB Community Annotation]	U	1.48082e-22	95.74
4	AGAP001595	RpS29	40S ribosomal protein S29 [Source:VB Community Annotation]	RTT	3.3363e-45	100
4	AGAP001662	0	ADAM-TS Spacer 1	U	4.63684e-73	100
4	AGAP001701	0	Small ubiquitin-related modifier [Source:UniProtKB/TrEMBL%3BAcc:Q7PY16]	D	1.46266e-28	91.49
4	AGAP001718	0	Unknown	U	5.44109e-60	93.62
4	AGAP001730	0	cyclin G2 [Source:VB Community Annotation]	D	1.93615e-15	93.62
4	AGAP001759	0	protein transport protein SEC23 [Source:VB Community Annotation]	TRP	6.81934e-19	85.11
4	AGAP001797	0	Tropomyosin 1 [Source:VB Community Annotation]	CS	7.06442e-23	97.87
4	AGAP001805	RpL13	60S ribosomal protein L13 [Source:UniProtKB/TrEMBL%3BAcc:Q7PUQ7]	RTT	8.95987e-86	100
4	AGAP001813	0	Histone H3 [Source:UniProtKB/TrEMBL%3BAcc:Q7PUQ8]	RTT	4.41096e-65	100
4	AGAP001874	0	Ras-related protein Rap-1A [Source:VB Community Annotation]	D	2.88697e-16	89.36
4	AGAP001910	RpS3	40S ribosomal protein S3 [Source:VB Community Annotation]	RTT	1.9967e-93	100
4	AGAP001911	RpL6	60S ribosomal protein L6 [Source:VB Community Annotation]	RTT	7.14424e-117	100
4	AGAP001928	0	nucleosome assembly protein 1-like 1 [Source:VB Community Annotation]	D	1.42687e-40	93.62
4	AGAP001930	0	heterogeneous nuclear ribonucleoprotein 27C [Source:VB Community Annotation]	RTT	9.47854e-19	95.74
4	AGAP001971	0	Polyubiquitin-C [Source:VB Community Annotation]	D	9.41183e-44	91.49
4	AGAP001995	Prosalpha2	26S proteasome alpha 2 subunit [Source:VB Community Annotation]	D	8.47528e-33	80.85
4	AGAP002032	0	hypothetical protein, possible vitellogenin	TRP	2.20391e-40	87.23
4	AGAP002063	0	nucleolar protein 56 [Source:VB Community Annotation]	D	3.64787e-56	97.87
4	AGAP002076	0	heat shock 70kDa protein 1/8 [Source:VB Community Annotation]	REDOX/STRESS/MIT	9.07706e-128	100
4	AGAP002122	RpL32	60S ribosomal protein L32 [Source:VB Community Annotation]	RTT	4.14008e-93	100
4	AGAP002186	0	very low-density lipoprotein receptor [Source:VB Community Annotation]	TRP	5.25941e-36	91.49
4	AGAP002239	0	Diamine acetyltransferase 1 [Source:VB Community Annotation]	D	1.12095e-13	80.85
4	AGAP002265	0	splicing factor%2C arginine/serine-rich 12 [Source:VB Community Annotation]	RTT	3.25475e-29	80.85
4	AGAP002306	RpL4	60S ribosomal protein L4 [Source:VB Community Annotation]	RTT	1.01171e-110	100
4	AGAP002337	eIF3d	Eukaryotic translation initiation factor 3 subunit D [Source:UniProtKB/Swiss-Prot%3BAcc:Q7QBW3]	RTT	1.15462e-39	87.23
4	AGAP002338	0	vacuolar protein sorting 29 homolog [Source:VB Community Annotation]	TRP	2.5066e-37	85.11
4	AGAP002346	RpS14-2	40S ribosomal protein S14b [Source:UniProtKB/Swiss-Prot%3BAcc:Q7QBX2]	RTT	3.34017e-61	100
4	AGAP002395	RpL10-2	60S ribosomal protein L10-2 [Source:VB Community Annotation]	RTT	1.45806e-113	100
4	AGAP002401	0	V-type H+-transporting ATPase subunit E [Source:VB Community Annotation]	TRP	8.14518e-27	82.98
4	AGAP002413	0	Basic leucine zipper and W2 domain-containing protein 1 [Source:VB Community Annotation]	RTT	2.81958e-36	100
4	AGAP002422	CLIPD1	CLIP-domain serine protease [Source:VB Community Annotation]	I	6.30108e-127	100
4	AGAP002437	RpS8	40S ribosomal protein S8 [Source:UniProtKB/TrEMBL%3BAcc:Q7QC42]	RTT	7.97351e-106	100
4	AGAP002440	Cdc42	cell division cycle Cdc42 homolog [Source:VB Community Annotation]	D	2.82459e-12	82.98
4	AGAP002464	0	secreted ferritin G subunit [Source:VB Community Annotation]	D	1.66348e-105	100
4	AGAP002465	0	ferritin heavy chain [Source:VB Community Annotation]	D	2.45456e-96	97.87
4	AGAP002468	RpL26	60S ribosomal protein L26 [Source:VB Community Annotation]	RTT	3.35552e-136	100
4	AGAP002525	0	eukaryotic translation initiation factor 2A [Source:VB Community Annotation]	RTT	7.30208e-38	85.11
4	AGAP002564	Aldo	fructose biphosphate aldolase [Source:VB Community Annotation]	M	1.35798e-07	85.11
4	AGAP002594	0	apolipoprotein D [Source:VB Community Annotation]	D	1.0947e-146	100
4	AGAP002599	0	polyubiquitin [Source:VB Community Annotation]	D	1.09456e-78	100
4	AGAP002630	0	NADH dehydrogenase (ubiquinone) 1 beta subcomplex 2 [Source:VB Community Annotation]	REDOX/STRESS/MIT	1.90502e-06	85.11
4	AGAP002655	0	putative splicing regulator	RTT	7.72205e-17	87.23
4	AGAP002667	Tctp	Translationally-controlled tumor protein homolog [Source:UniProtKB/Swiss-Prot%3BAcc:Q7QCK2]	RTT	6.22655e-68	100
4	AGAP002685	APG8	autophagy related gene [Source:VB Community Annotation]	CS	1.34171e-16	87.23
4	AGAP002693	ABCF1	ATP-binding cassette transporter (ABC transporter) family F member 1 [Source:VB Community Annotation]	TRP	1.59732e-28	80.85
4	AGAP002754	RpL35a	60S ribosomal protein L35a [Source:VB Community Annotation]	RTT	3.27281e-95	100
4	AGAP002759	0	T-complex protein 1 subunit gamma [Source:UniProtKB/TrEMBL%3BAcc:Q7QCQ5]	D	8.69245e-54	89.36
4	AGAP002858	0	Sodium/potassium-transporting ATPase subunit alpha [Source:UniProtKB/TrEMBL%3BAcc:F5HKJ1]	TRP	2.4096e-20	97.87
4	AGAP002878	0	Cystatin-like protein [Source:VB Community Annotation]	D	1.38437e-21	85.11
4	AGAP002879	0	cathepsin F [Source:VB Community Annotation]	PROT	1.15498e-49	93.62
4	AGAP002889	0	NADH dehydrogenase (ubiquinone) 1 subcomplex unknown 2 [Source:VB Community Annotation]	REDOX/STRESS/MIT	0.000244954	80.85
4	AGAP002919	RpS6	40S ribosomal protein S6 [Source:VB Community Annotation]	RTT	5.23864e-81	100
4	AGAP002921	RpL36	60S ribosomal protein L36 [Source:UniProtKB/TrEMBL%3BAcc:Q7PQY8]	RTT	2.03733e-105	100
4	AGAP002931	Arf2	ADP-ribosylation factor 2 [Source:VB Community Annotation]	D	2.07004e-34	89.36
4	AGAP002935	eIF3f	Eukaryotic translation initiation factor 3 subunit F [Source:UniProtKB/Swiss-Prot%3BAcc:Q7QD36]	RTT	7.48616e-22	87.23
4	AGAP003016	0	mesencephalic astrocyte-derived neurotrophic factor homolog [Source:VB Community Annotation]	D	4.18802e-29	87.23
4	AGAP003021	0	Clathrin heavy chain [Source:UniProtKB/TrEMBL%3BAcc:Q7PQY9]	TRP	4.12436e-21	91.49
4	AGAP003025	RpLp2	60S ribosomal protein LP2 [Source:VB Community Annotation]	RTT	3.12343e-70	100
4	AGAP003047	0	ATP-dependent RNA helicase [Source:VB Community Annotation]	RTT	2.51412e-16	80.85
4	AGAP003069	0	signal peptidase%2C endoplasmic reticulum-type [Source:VB Community Annotation]	D	4.95896e-66	91.49
4	AGAP003119	0	translation initiation factor 1A [Source:VB Community Annotation]	RTT	7.65865e-63	97.87
4	AGAP003277	0	cathepsin D [Source:VB Community Annotation]	PROT	3.32234e-46	91.49
4	AGAP003304	0	CREG/Cellular Repressor of E1A- and JH-stimulated Genes	U	3.15705e-54	89.36
4	AGAP003325	0	NADH dehydrogenase (ubiquinone) 1 alpha subcomplex 4 [Source:VB Community Annotation]	REDOX/STRESS/MIT	9.10001e-44	100
4	AGAP003372	0	Haloacid dehalogenase-like hydrolase domain-containing protein 1A [Source:VB Community Annotation]	M	3.07978e-12	80.85
4	AGAP003408	0	aldose reductase [Source:VB Community Annotation]	REDOX/STRESS/MIT	5.38329e-35	80.85
4	AGAP003412	RpS28	40S ribosomal protein S28 [Source:VB Community Annotation]	RTT	3.51005e-57	100
4	AGAP003430	VhaM8.9	vacuolar H+ ATPase M8.9 accessory subunit [Source:VB Community Annotation]	TRP	2.84157e-54	89.36
4	AGAP003462	0	protein arginine N-methyltransferase 1 [Source:VB Community Annotation]	D	3.96231e-29	80.85
4	AGAP003477	0	T-complex protein 1 subunit zeta [Source:VB Community Annotation]	D	6.15554e-32	85.11
4	AGAP003532	RpS3a	40S ribosomal protein S3a [Source:UniProtKB/Swiss-Prot%3BAcc:P52813]	RTT	8.80505e-121	100
4	AGAP003538	RpL36a	60S ribosomal protein L36a [Source:VB Community Annotation]	RTT	6.29344e-89	100
4	AGAP003553	0	Transmembrane emp24 protein transport domain containing 9 [Source:VB Community Annotation]	D	5.20493e-15	82.98
4	AGAP003556	RpL3	60S ribosomal protein L3 [Source:VB Community Annotation]	RTT	9.78716e-77	100
4	AGAP003578	0	aldehyde dehydrogenase (NAD+) [Source:VB Community Annotation]	M	5.3009e-26	80.85
4	AGAP003586	0	Phosphate carrier%2C mitochondrial [Source:VB Community Annotation]	REDOX/STRESS/MIT	9.27782e-06	85.11
4	AGAP003592	RpLP0	60S ribosomal protein LP0 [Source:VB Community Annotation]	RTT	7.67036e-100	100
4	AGAP003597	0	histone-lysine N-methyltransferase SUV39H [Source:VB Community Annotation]	RTT	1.2316e-06	80.85
4	AGAP003599	0	F-type H+-transporting ATPase oligomycin sensitivity conferral protein [Source:VB Community Annotation]	TRP	1.47956e-41	91.49
4	AGAP003649	0	Znf216-like, NF-kB inhibitor	D	9.4425e-07	80.85
4	AGAP003663	0	ATP-dependent RNA helicase DBP2 [Source:VB Community Annotation]	RTT	6.72381e-48	97.87
4	AGAP003687	0	glycerol-3-phosphate O-acyltransferase 1/2 [Source:VB Community Annotation]	M	6.74074e-05	80.85
4	AGAP003711	0	V-type H+-transporting ATPase subunit I [Source:VB Community Annotation]	TRP	1.80258e-24	91.49
4	AGAP003721	ANXB10B	annexin B10B [Source:VB Community Annotation]	CS	5.98826e-26	80.85
4	AGAP003767	0	Ecdysteroid kinase	D	7.10184e-35	82.98
4	AGAP003768	RpS2	40S ribosomal protein S2 [Source:VB Community Annotation]	RTT	1.75632e-97	100
4	AGAP003816	RpL30	60S ribosomal protein L30 [Source:VB Community Annotation]	RTT	7.39975e-64	100
4	AGAP003864	0	Unknown	U	3.04203e-06	80.85
4	AGAP003878	0	LRR TM	U	7.88277e-45	89.36
4	AGAP003893	0	C-terminal-binding protein [Source:VB Community Annotation]	D	3.77896e-21	93.62
4	AGAP003914	0	Unknown	D	9.459e-05	85.11
4	AGAP003935	Prosalpha1	26S proteasome alpha 1 subunit [Source:VB Community Annotation]	D	1.23672e-32	89.36
4	AGAP004016	0	Leucine-rich repeats (LRRs)	U	5.9322e-90	100
4	AGAP004017	0	Leucine rich repeat (LRR)	I	1.8266e-119	97.87
4	AGAP004026	GPRMTH6	methuselah receptor 6 [Source:VB Community Annotation]	D	4.37924e-25	85.11
4	AGAP004031	0	mitochondrial electron transfer flavoprotein subunit alpha [Source:VB Community Annotation]	REDOX/STRESS/MIT	1.79552e-34	82.98
4	AGAP004098	0	GTP-binding protein SAR1 [Source:VB Community Annotation]	D	4.59794e-42	87.23
4	AGAP004146	0	Ras-related protein Rab-1A [Source:VB Community Annotation]	D	2.42618e-24	95.74
4	AGAP004164	GSTD1-4	glutathione S-transferase delta class 1 [Source:VB Community Annotation]	REDOX/STRESS/MIT	1.00667e-18	89.36
4	AGAP004192	0	heat shock 70kDa protein 5 [Source:VB Community Annotation]	REDOX/STRESS/MIT	3.52502e-64	93.62
4	AGAP004212	Crc	calreticulin [Source:VB Community Annotation]	TRP	1.51171e-64	95.74
4	AGAP004235	0	elongation factor 1-delta [Source:VB Community Annotation]	RTT	1.59707e-48	97.87
4	AGAP004247	GPXH1	glutathione peroxidase 1 [Source:VB Community Annotation]	REDOX/STRESS/MIT	2.05979e-26	91.49
4	AGAP004296	0	signal peptidase complex subunit 1 [Source:VB Community Annotation]	D	1.51859e-22	87.23
4	AGAP004349	0	K homology RNA-binding domain	U	6.0922e-76	100
4	AGAP004395	0	nucleophosmin 3 [Source:VB Community Annotation]	D	8.76016e-79	97.87
4	AGAP004400	0	CYTC oxidase, subunit 8	U	6.38906e-06	97.87
4	AGAP004422	RpL19	60S ribosomal protein L19 [Source:VB Community Annotation]	RTT	1.32764e-95	100
4	AGAP004462	RpS25	40S ribosomal protein S25 [Source:VB Community Annotation]	RTT	9.03677e-75	100
4	AGAP004486	0	adiponectin receptor [Source:VB Community Annotation]	D	5.31661e-06	80.85
4	AGAP004533	0	cathepsin B [Source:VB Community Annotation]	PROT	5.94342e-50	93.62
4	AGAP004592	0	splicing factor%2C arginine/serine-rich 4/5/6 [Source:VB Community Annotation]	RTT	2.49093e-14	87.23
4	AGAP004616	0	F-type H+-transporting ATPase subunit 6 [Source:VB Community Annotation]	TRP	2.73764e-09	89.36
4	AGAP004710	0	ubiquinol-cytochrome c reductase subunit 9 [Source:VB Community Annotation]	U	2.23321e-06	80.85
4	AGAP004721	0	N-acetylglucosamine-6-sulfatase [Source:VB Community Annotation]	M	6.16843e-07	93.62
4	AGAP004739	0	H/ACA ribonucleoprotein complex subunit 4 [Source:VB Community Annotation]	D	2.72858e-54	93.62
4	AGAP004750	0	translation initiation factor 4G [Source:VB Community Annotation]	RTT	3.86107e-05	80.85
4	AGAP004775	0	Xaa-Pro dipeptidase [Source:VB Community Annotation]	PROT	4.43349e-33	82.98
4	AGAP004819	0	receptor expression-enhancing protein 5 [Source:VB Community Annotation]	D	6.52876e-16	91.49
4	AGAP004867	0	V-type H+-transporting ATPase subunit G [Source:VB Community Annotation]	TRP	1.35031e-21	85.11
4	AGAP004886	0	microtubule-associated protein%2C RP/EB family [Source:VB Community Annotation]	CS	4.57113e-16	80.85
4	AGAP004887	RpS17	40S ribosomal protein S17 [Source:UniProtKB/Swiss-Prot%3BAcc:Q9U9L1]	RTT	1.26343e-96	100
4	AGAP004916	0	FREP11	I	2.85968e-34	82.98
4	AGAP004917	0	fibrinogen-related protein 1 [Source:VB Community Annotation]	I	1.85355e-29	87.23
4	AGAP004918	0	fibrinogen [Source:VB Community Annotation]	I	2.82697e-52	93.62
4	AGAP004919	RpL15	60S ribosomal protein L15 [Source:UniProtKB/Swiss-Prot%3BAcc:P52818]	RTT	2.20815e-91	100
4	AGAP004936	0	EGF repeats	D	2.30197e-94	100
4	AGAP004944	0	heat shock 70kDa protein 1/8 [Source:VB Community Annotation]	REDOX/STRESS/MIT	1.12642e-17	87.23
4	AGAP004993	0	laminin subunit alpha [Source:VB Community Annotation]	CS	6.69986e-53	95.74
4	AGAP005046	RpL22	60S ribosomal protein L22 [Source:VB Community Annotation]	RTT	3.84604e-85	100
4	AGAP005061	RpS9	40S ribosomal protein S9 [Source:VB Community Annotation]	RTT	2.26654e-69	100
4	AGAP005131	RpS24	40S ribosomal protein S24 [Source:UniProtKB/TrEMBL%3BAcc:Q7PQ02]	RTT	1.06721e-92	100
4	AGAP005134	0	F-type H+-transporting ATPase subunit alpha [Source:VB Community Annotation]	TRP	5.81247e-68	97.87
4	AGAP005160	0	Ras homolog gene family%2C member A [Source:VB Community Annotation]	D	6.94007e-16	95.74
4	AGAP005202	0	RING-box protein 1 [Source:VB Community Annotation]	D	3.36074e-22	82.98
4	AGAP005369	0	SRP40	U	1.76011e-15	91.49
4	AGAP005393	0	Ras-related protein Rab-2A [Source:VB Community Annotation]	D	1.1715e-17	85.11
4	AGAP005427	RpL28	60S ribosomal protein L28 [Source:VB Community Annotation]	RTT	1.63502e-97	100
4	AGAP005504	0	phospholipid scramblase 1 [Source:VB Community Annotation]	D	3.72056e-34	93.62
4	AGAP005558	0	peptidase (mitochondrial processing) beta [Source:VB Community Annotation]	REDOX/STRESS/MIT	2.38596e-45	87.23
4	AGAP005608	0	NUCB1	D	5.49352e-32	80.85
4	AGAP005611	0	Unknown	U	7.9805e-45	95.74
4	AGAP005618	0	1%2C2-dihydroxy-3-keto-5-methylthiopentene dioxygenase [Source:UniProtKB/TrEMBL%3BAcc:Q7Q6X6]	D	3.56918e-26	85.11
4	AGAP005625	SCRASP1	Class A Scavenger Receptor (SRCR domain) with Serine Protease domain. [Source:VB Community Annotation]	I	1.03522e-50	95.74
4	AGAP005630	0	transitional endoplasmic reticulum ATPase [Source:VB Community Annotation]	D	1.13392e-41	82.98
4	AGAP005674	0	Miple [Source:VB Community Annotation]	U	4.90883e-20	87.23
4	AGAP005685	0	Learning associated protein 18-like	U	9.13205e-21	89.36
4	AGAP005749	GSTO1	glutathione S-transferase omega class 1 [Source:VB Community Annotation]	REDOX/STRESS/MIT	5.35984e-27	85.11
4	AGAP005764	0	Oligosaccaryltransferase	M	3.13359e-12	80.85
4	AGAP005775	0	Bax inhibitor 1 [Source:VB Community Annotation]	D	1.01684e-35	89.36
4	AGAP005802	RpL8	60S ribosomal protein L8 [Source:UniProtKB/Swiss-Prot%3BAcc:Q9U9L2]	RTT	1.33313e-122	100
4	AGAP005813	0	FeS cluster assembly scaffold IscU [Source:VB Community Annotation]	M	3.21899e-22	85.11
4	AGAP005820	0	Unknown	U	2.33843e-65	91.49
4	AGAP005849	0	colmedin [Source:VB Community Annotation]	CS	2.5064e-47	93.62
4	AGAP005935	0	UPF0197	U	1.93154e-29	89.36
4	AGAP005947	RpS13	40S ribosomal protein S13 [Source:UniProtKB/Swiss-Prot%3BAcc:P52811]	RTT	4.97868e-98	100
4	AGAP005960	RpL7a	60S ribosomal protein L7a [Source:UniProtKB/Swiss-Prot%3BAcc:O76732]	RTT	3.82171e-123	100
4	AGAP005981	0	DnaJ homolog subfamily A member 1 [Source:VB Community Annotation]	REDOX/STRESS/MIT	6.81933e-22	80.85
4	AGAP005991	RpL14	60S ribosomal protein L14 [Source:VB Community Annotation]	RTT	1.64985e-99	100
4	AGAP006037	RpL24	60S ribosomal protein L24 [Source:VB Community Annotation]	RTT	4.12455e-117	100
4	AGAP006068	0	DUF229	U	1.23153e-31	91.49
4	AGAP006099	0	ubiquinol-cytochrome c reductase core subunit 2 [Source:VB Community Annotation]	D	2.6022e-31	80.85
4	AGAP006108	0	Y-box protein	D	7.438e-24	87.23
4	AGAP006130	eIF3l	Eukaryotic translation initiation factor 3 subunit L [Source:UniProtKB/Swiss-Prot%3BAcc:Q7Q5Y8]	RTT	5.23895e-34	80.85
4	AGAP006246	0	Sorcin [Source:VB Community Annotation]	PROT	8.62636e-17	82.98
4	AGAP006278	0	Odorant-binding protein 99a - Drosophila melanogaster	CSR	9.17489e-63	93.62
4	AGAP006459	SUI1	Protein translation factor SUI1 homolog [Source:UniProtKB/Swiss-Prot%3BAcc:P42678]	D	9.45948e-68	100
4	AGAP006478	0	Synaptic vesicle membrane protein VAT-1 homolog-like [Source:VB Community Annotation]	D	6.06631e-15	80.85
4	AGAP006612	RpL29	60S ribosomal protein L29 [Source:VB Community Annotation]	RTT	3.83894e-75	100
4	AGAP006614	0	transcription factor BTF3 homolog 4 [Source:VB Community Annotation]	RTT	2.07777e-67	100
4	AGAP006630	0	NADH dehydrogenase (ubiquinone) 1 alpha subcomplex 1 [Source:VB Community Annotation]	REDOX/STRESS/MIT	1.08314e-06	82.98
4	AGAP006745	0	Ninjurin	I	1.67181e-40	89.36
4	AGAP006766	0	nascent polypeptide-associated complex subunit alpha [Source:VB Community Annotation]	U	1.55935e-71	100
4	AGAP006782	0	ADP%2CATP carrier protein 1 [Source:VB Community Annotation]	TRP	6.57402e-74	100
4	AGAP006871	RpS4	40S ribosomal protein S4 [Source:UniProtKB/TrEMBL%3BAcc:Q7PT95]	RTT	2.7454e-112	100
4	AGAP006879	0	F-type H+-transporting ATPase subunit e [Source:VB Community Annotation]	TRP	5.4225e-18	91.49
4	AGAP006921	0	CED6	U	4.22609e-39	89.36
4	AGAP006936	0	mitochondrial cytochrome c1 heme protein [Source:VB Community Annotation]	REDOX/STRESS/MIT	2.63189e-18	87.23
4	AGAP006944	eIF3e	Eukaryotic translation initiation factor 3 subunit E [Source:UniProtKB/Swiss-Prot%3BAcc:Q7QIL8]	RTT	1.23387e-30	91.49
4	AGAP006958	Hsp83	Heat shock protein 83 [Source:UniProtKB/Swiss-Prot%3BAcc:Q7PT10]	REDOX/STRESS/MIT	6.47871e-30	95.74
4	AGAP006959	0	molecular chaperone HtpG [Source:VB Community Annotation]	REDOX/STRESS/MIT	1.94269e-09	87.23
4	AGAP006961	0	molecular chaperone HtpG [Source:VB Community Annotation]	REDOX/STRESS/MIT	1.96368e-23	93.62
4	AGAP007055	0	sodium-dependent dicarboxylate transporter sdcS [Source:VB Community Annotation]	TRP	4.62368e-28	89.36
4	AGAP007087	RpL41	60s ribosomal protein L41 [Source:UniProtKB/TrEMBL%3BAcc:Q52P89]	RTT	1.0862e-98	100
4	AGAP007088	0	peptidyl-prolyl cis-trans isomerase B (cyclophilin B) [Source:VB Community Annotation]	D	7.52238e-92	100
4	AGAP007120	0	nucleoside-diphosphate kinase [Source:VB Community Annotation]	D	7.18574e-89	100
4	AGAP007131	0	AP-2 complex subunit mu-1 [Source:VB Community Annotation]	TRP	1.47616e-39	95.74
4	AGAP007157	RpS27	40S ribosomal protein S27 [Source:UniProtKB/TrEMBL%3BAcc:Q7PT96]	RTT	7.74679e-79	100
4	AGAP007202	0	poly(A) RNA binding	U	8.40472e-33	82.98
4	AGAP007208	0	NADH dehydrogenase (ubiquinone) 1 alpha subcomplex 11 [Source:VB Community Annotation]	REDOX/STRESS/MIT	9.45865e-08	82.98
4	AGAP007209	0	Tetraspanin [Source:UniProtKB/TrEMBL%3BAcc:Q7PTA7]	D	1.69328e-61	91.49
4	AGAP007237	HPX4	heme peroxidase 4 [Source:VB Community Annotation]	I	1.75857e-62	85.11
4	AGAP007297	0	NADH dehydrogenase (ubiquinone) 1 beta subcomplex 5 [Source:VB Community Annotation]	REDOX/STRESS/MIT	5.17112e-13	80.85
4	AGAP007312	0	Unknown	U	2.18368e-86	100
4	AGAP007366	0	Uncharacterised protein family, CD034/YQF4	U	4.05942e-30	95.74
4	AGAP007393	0	protein disulfide isomerase family A%2C member 3 [Source:VB Community Annotation]	D	6.47906e-112	97.87
4	AGAP007406	0	Elongation factor 1-alpha [Source:UniProtKB/TrEMBL%3BAcc:Q7PT29]	RTT	3.83766e-92	100
4	AGAP007473	0	FK506-binding nuclear protein [Source:VB Community Annotation]	U	1.54331e-48	91.49
4	AGAP007580	RpL18	60S ribosomal protein L18 [Source:UniProtKB/Swiss-Prot%3BAcc:Q7QJM5]	RTT	1.18076e-125	100
4	AGAP007609	0	DAZ associated protein 2	U	7.0361e-62	91.49
4	AGAP007619	0	cytosolic nonspecific dipeptidase [Source:VB Community Annotation]	PROT	8.83339e-36	89.36
4	AGAP007621	0	cytochrome c oxidase VIIc [Source:VB Community Annotation]	REDOX/STRESS/MIT	2.81644e-12	93.62
4	AGAP007629	LANB2	laminin gamma 1 [Source:VB Community Annotation]	CS	5.20687e-78	97.87
4	AGAP007635	0	60S ribosomal protein L7 [Source:VB Community Annotation]	RTT	5.08874e-29	87.23
4	AGAP007638	0	oligosaccharyltransferase complex subunit delta (ribophorin II) [Source:VB Community Annotation]	D	2.70582e-62	87.23
4	AGAP007643	0	Tyrosine 3-monooxygenase/tryptophan 5-monooxygenase activation protein%2C beta polypeptide 2 [Source:VB Community Annotation]	D	6.66746e-37	100
4	AGAP007668	eIF3g	Eukaryotic translation initiation factor 3 subunit G [Source:UniProtKB/Swiss-Prot%3BAcc:Q7QJV0]	RTT	3.96782e-33	89.36
4	AGAP007699	0	GTP-binding nuclear protein Ran [Source:VB Community Annotation]	D	2.39466e-51	95.74
4	AGAP007740	RpLP1	60S ribosomal protein LP1 [Source:VB Community Annotation]	RTT	7.10051e-115	100
4	AGAP007768	0	mitochondrial cytochrome c oxidase subunit VIC [Source:VB Community Annotation]	REDOX/STRESS/MIT	2.39776e-16	93.62
4	AGAP007841	0	F-type H+-transporting ATPase subunit delta [Source:VB Community Annotation]	TRP	1.54905e-40	95.74
4	AGAP007867	0	Unknown	U	4.87702e-10	97.87
4	AGAP007901	0	Ras-related protein Rab-5C [Source:VB Community Annotation]	D	5.74622e-30	95.74
4	AGAP007927	RpL40	60S ribosomal protein L40 [Source:VB Community Annotation]	RTT	2.74423e-71	100
4	AGAP007941	0	serine palmitoyltransferase [Source:VB Community Annotation]	M	3.5609e-29	80.85
4	AGAP007957	0	choline/ethanolamine kinase [Source:VB Community Annotation]	M	7.13241e-16	82.98
4	AGAP007966	0	F-type H+-transporting ATPase subunit gamma [Source:VB Community Annotation]	TRP	1.39154e-40	91.49
4	AGAP008000	0	sepiapterin reductase [Source:VB Community Annotation]	REDOX/STRESS/MIT	6.63796e-36	80.85
4	AGAP008008	0	coiled-coil domain-containing protein 72 homolog [Source:VB Community Annotation]	U	5.17747e-05	87.23
4	AGAP008075	0	cellular nucleic acid-binding protein [Source:VB Community Annotation]	D	2.83503e-39	100
4	AGAP008163	0	U4/U6 small nuclear ribonucleoprotein SNU13 [Source:VB Community Annotation]	RTT	2.72328e-21	89.36
4	AGAP008249	0	T-complex protein%2C epsilon subunit [Source:VB Community Annotation]	D	9.17637e-17	80.85
4	AGAP008329	RpS5	40S ribosomal protein S5 [Source:VB Community Annotation]	RTT	2.93266e-114	100
4	AGAP008491	0	oligosaccharyltransferase complex subunit epsilon [Source:VB Community Annotation]	D	1.45228e-29	95.74
4	AGAP008632	0	alpha-aminoadipic semialdehyde synthase [Source:VB Community Annotation]	REDOX/STRESS/MIT	6.91495e-35	82.98
4	AGAP008724	0	mitochondrial cytochrome c oxidase subunit 5B isoform 1 [Source:VB Community Annotation]	REDOX/STRESS/MIT	5.47526e-35	100
4	AGAP008727	0	cytochrome c oxidase subunit 4%2C mitochondrial precursor [Source:VB Community Annotation]	REDOX/STRESS/MIT	6.28118e-21	93.62
4	AGAP008822	0	FK506-binding protein 14 [Source:VB Community Annotation]	U	3.00818e-62	95.74
4	AGAP008909	0	phosphatidylethanolamine binding	D	1.27963e-29	100
4	AGAP008916	RpL7	60S ribosomal protein L7 [Source:VB Community Annotation]	RTT	6.10587e-105	100
4	AGAP008955	0	ubiquinol-cytochrome c reductase iron-sulfur subunit [Source:VB Community Annotation]	D	1.96763e-32	95.74
4	AGAP009031	RpL5	60S ribosomal protein L5 [Source:VB Community Annotation]	RTT	8.39452e-104	100
4	AGAP009075	0	ATP-dependent RNA helicase UAP56/SUB2 [Source:VB Community Annotation]	RTT	4.88877e-30	85.11
4	AGAP009156	0	BRICHOS domain	D	3.87085e-11	85.11
4	AGAP009182	0	protein transport protein SEC61 subunit alpha [Source:VB Community Annotation]	TRP	5.71456e-49	85.11
4	AGAP009200	0	collagen type IV alpha [Source:VB Community Annotation]	CS	7.04609e-113	100
4	AGAP009201	0	collagen type IV alpha [Source:VB Community Annotation]	CS	6.41515e-92	100
4	AGAP009271	Prosbeta1	26S proteasome beta 1 subunit [Source:VB Community Annotation]	D	3.74246e-18	85.11
4	AGAP009324	RpL34	60S ribosomal protein L34 [Source:VB Community Annotation]	RTT	9.89041e-109	100
4	AGAP009334	0	V-type H+-transporting ATPase 21kDa proteolipid subunit [Source:VB Community Annotation]	TRP	1.216e-13	82.98
4	AGAP009336	0	RNA recognition motif domain	RTT	3.10996e-46	82.98
4	AGAP009431	RpS21	40S ribosomal protein S21 [Source:UniProtKB/TrEMBL%3BAcc:Q7PTN4]	RTT	2.00981e-62	100
4	AGAP009441	0	elongation factor 2 [Source:VB Community Annotation]	RTT	5.32266e-74	100
4	AGAP009443	0	excitatory amino acid transporter 3 [Source:VB Community Annotation]	TRP	5.25965e-06	87.23
4	AGAP009491	0	F-type H+-transporting ATPase subunit g [Source:VB Community Annotation]	TRP	5.50547e-08	95.74
4	AGAP009493	alpha9	nicotinic acetylcholine receptor subunit alpha 9 [Source:VB Community Annotation]	TRP	4.43989e-56	95.74
4	AGAP009505	0	T-complex protein 1%2C delta subunit [Source:VB Community Annotation]	D	3.41692e-49	87.23
4	AGAP009508	RpL9	60S ribosomal protein L9 [Source:VB Community Annotation]	RTT	7.84311e-127	100
4	AGAP009522	0	fibronectin type-III domain-containing protein 3a [Source:VB Community Annotation]	D	6.30592e-07	80.85
4	AGAP009537	0	cytochrome c [Source:VB Community Annotation]	REDOX/STRESS/MIT	5.48548e-35	95.74
4	AGAP009569	0	syntenin-1 isoform 1 [Source:VB Community Annotation]	D	1.18413e-28	80.85
4	AGAP009572	RpS15a-2	40S ribosomal protein S15a [Source:VB Community Annotation]	RTT	1.0773e-59	100
4	AGAP009584	TRX1	Thioredoxin [Source:UniProtKB/TrEMBL%3BAcc:Q9NGZ1]	REDOX/STRESS/MIT	2.38242e-60	100
4	AGAP009602	0	NADH dehydrogenase (ubiquinone) 1 beta subcomplex 6 [Source:VB Community Annotation]	REDOX/STRESS/MIT	9.90687e-14	80.85
4	AGAP009647	0	proteasome maturation protein [Source:VB Community Annotation]	D	9.3879e-10	85.11
4	AGAP009651	0	CD63 antigen [Source:VB Community Annotation]	D	2.97765e-33	85.11
4	AGAP009652	0	NADH dehydrogenase (ubiquinone) 1 alpha subcomplex 13 [Source:VB Community Annotation]	REDOX/STRESS/MIT	2.57399e-07	80.85
4	AGAP009668	0	lysosomal-associated membrane protein 1/2 [Source:VB Community Annotation]	D	1.07011e-75	95.74
4	AGAP009670	SRPN4	serine protease inhibitor (serpin) 4 [Source:VB Community Annotation]	I	7.10749e-51	93.62
4	AGAP009694	0	T-complex protein 1 subunit beta [Source:VB Community Annotation]	D	5.20383e-30	82.98
4	AGAP009738	GRX3	glutaredoxin [Source:VB Community Annotation]	REDOX/STRESS/MIT	1.62584e-26	82.98
4	AGAP009824	0	NADH dehydrogenase (ubiquinone) Fe-S protein 5 [Source:VB Community Annotation]	REDOX/STRESS/MIT	7.43646e-05	93.62
4	AGAP009833	0	voltage-dependent anion-selective channel protein 2 [Source:VB Community Annotation]	TRP	2.13397e-26	82.98
4	AGAP009861	0	Profilin protein [Source:VB Community Annotation]	CS	8.25095e-62	100
4	AGAP009863	0	eukaryotic translation initiation factor 4A%2C isoform 2 [Source:VB Community Annotation]	RTT	6.83953e-89	100
4	AGAP009907	0	leukotriene-A4 hydrolase [Source:VB Community Annotation]	PROT	1.28275e-33	82.98
4	AGAP009920	RpL37a	60S ribosomal protein L37a [Source:VB Community Annotation]	RTT	1.50656e-91	100
4	AGAP009998	RpS11	40S ribosomal protein S11 [Source:UniProtKB/Swiss-Prot%3BAcc:P52812]	RTT	1.73974e-88	100
4	AGAP010010	0	oligosaccharyltransferase complex subunit gamma [Source:VB Community Annotation]	D	8.01282e-40	93.62
4	AGAP010065	RpL12	60S ribosomal protein L12 [Source:VB Community Annotation]	RTT	1.33259e-94	100
4	AGAP010131	0	ornithine decarboxylase antizyme 1 [Source:VB Community Annotation]	M	1.73721e-33	95.74
4	AGAP010163	RpL38	60S ribosomal protein L38 [Source:UniProtKB/Swiss-Prot%3BAcc:Q7Q0U1]	RTT	1.23499e-90	100
4	AGAP010172	0	protein phosphatase 2 (formerly 2A)%2C catalytic subunit [Source:VB Community Annotation]	D	2.29052e-08	82.98
4	AGAP010173	Rack1	guanine nucleotide-binding protein subunit beta-like protein [Source:VB Community Annotation]	D	2.65113e-70	100
4	AGAP010174	0	oligosaccharyltransferase complex subunit alpha (ribophorin I) [Source:VB Community Annotation]	D	2.50731e-43	87.23
4	AGAP010188	0	stress-induced-phosphoprotein 1 [Source:VB Community Annotation]	D	1.01088e-25	80.85
4	AGAP010216	RpL25	60S ribosomal protein L25 [Source:VB Community Annotation]	RTT	1.25153e-88	100
4	AGAP010224	0	ER lumen protein retaining receptor [Source:VB Community Annotation]	TRP	1.63841e-23	80.85
4	AGAP010225	0	ER lumen protein retaining receptor [Source:VB Community Annotation]	TRP	2.1559e-30	93.62
4	AGAP010226	0	Unknown	U	7.2338e-11	80.85
4	AGAP010252	RpL23	60S ribosomal protein L23 [Source:VB Community Annotation]	RTT	6.32329e-101	100
4	AGAP010257	RpL13a	60S ribosomal protein L13a [Source:VB Community Annotation]	RTT	1.08825e-81	100
4	AGAP010331	0	heat shock protein 110kDa [Source:VB Community Annotation]	REDOX/STRESS/MIT	6.09573e-15	82.98
4	AGAP010337	0	ubiquinol-cytochrome c reductase subunit 8 [Source:VB Community Annotation]	D	1.94232e-37	95.74
4	AGAP010347	CuSOD3	copper-zinc superoxide dismutase 3 [Source:VB Community Annotation]	REDOX/STRESS/MIT	3.87705e-61	97.87
4	AGAP010392	0	calumenin [Source:VB Community Annotation]	U	2.72644e-69	95.74
4	AGAP010445	0	Rab11 family-interacting protein 3/4 [Source:VB Community Annotation]	D	3.66234e-15	80.85
4	AGAP010464	0	NADH dehydrogenase (ubiquinone) 1 alpha/beta subcomplex 1 [Source:VB Community Annotation]	REDOX/STRESS/MIT	6.06443e-35	80.85
4	AGAP010510	0	Tubulin beta chain [Source:UniProtKB/TrEMBL%3BAcc:Q7PPR6]	CS	2.17396e-47	95.74
4	AGAP010580	0	Farnesoic acid 0-methyl transferase	M	1.15836e-89	95.74
4	AGAP010588	0	T-complex protein 1 subunit theta [Source:VB Community Annotation]	D	3.90746e-38	80.85
4	AGAP010589	0	guanine nucleotide-binding protein subunit gamma [Source:VB Community Annotation]	D	9.41272e-44	91.49
4	AGAP010591	RpS20	40S ribosomal protein S20 [Source:VB Community Annotation]	RTT	1.41314e-76	100
4	AGAP010592	S7	40S ribosomal protein S7 [Source:UniProtKB/Swiss-Prot%3BAcc:P33514]	RTT	8.47055e-118	100
4	AGAP010608	0	Clathrin light chain [Source:UniProtKB/TrEMBL%3BAcc:Q5TSE5]	TRP	4.39446e-16	93.62
4	AGAP010612	0	elongation factor 1-beta [Source:VB Community Annotation]	RTT	2.19484e-70	100
4	AGAP010727	0	Mucin	U	1.39024e-65	100
4	AGAP010755	0	protein mago nashi [Source:VB Community Annotation]	D	1.56249e-32	82.98
4	AGAP010816	TEP3	thioester-containing protein 3 [Source:VB Community Annotation]	I	2.85185e-43	87.23
4	AGAP010876	0	molecular chaperone DnaK [Source:VB Community Annotation]	REDOX/STRESS/MIT	3.96649e-41	91.49
4	AGAP010929	tubB	Tubulin beta chain [Source:UniProtKB/TrEMBL%3BAcc:Q7PSI4]	CS	1.2348e-25	82.98
4	AGAP010933	RpS19	40S ribosomal protein S19 [Source:VB Community Annotation]	RTT	8.50522e-115	100
4	AGAP010957	0	calmodulin [Source:VB Community Annotation]	D	9.06772e-59	100
4	AGAP011034	0	Odz%2C odd Oz/ten-m homolog 1 [Source:VB Community Annotation]	D	8.31651e-63	97.87
4	AGAP011050	0	aldehyde reductase [Source:VB Community Annotation]	REDOX/STRESS/MIT	1.44198e-47	80.85
4	AGAP011054	TPX2	thioredoxin peroxidase 2 [Source:VB Community Annotation]	I	1.00007e-93	100
4	AGAP011076	0	ubiquitin-conjugating enzyme E2 I [Source:VB Community Annotation]	D	9.38241e-32	80.85
4	AGAP011077	RpS12	40S ribosomal protein S12 [Source:UniProtKB/TrEMBL%3BAcc:Q7PSP8]	RTT	2.76048e-60	100
4	AGAP011092	0	Polyadenylate-binding protein [Source:UniProtKB/TrEMBL%3BAcc:Q7QH99]	D	3.27822e-68	100
4	AGAP011107	GRX1	glutaredoxin [Source:VB Community Annotation]	REDOX/STRESS/MIT	2.0415e-22	89.36
4	AGAP011119	0	Lysozyme, I type	I	3.97373e-55	93.62
4	AGAP011131	0	F-type H+-transporting ATPase subunit d [Source:VB Community Annotation]	TRP	1.40852e-30	93.62
4	AGAP011157	0	cytosolic prostaglandin-E synthase [Source:VB Community Annotation]	D	1.89216e-36	85.11
4	AGAP011159	CoVa	cytochrome c oxidase subunit Va [Source:VB Community Annotation]	REDOX/STRESS/MIT	1.16642e-38	100
4	AGAP011161	0	transketolase [Source:VB Community Annotation]	D	1.04651e-33	87.23
4	AGAP011165	0	prefoldin [Source:VB Community Annotation]	D	8.60373e-23	82.98
4	AGAP011166	0	protein phosphatase 1%2C catalytic subunit [Source:VB Community Annotation]	D	3.9875e-25	85.11
4	AGAP011173	RpL11	60S ribosomal protein L11 [Source:VB Community Annotation]	RTT	3.01974e-112	100
4	AGAP011197	FBN9	FBN9	I	6.00027e-60	100
4	AGAP011228	0	FBN2	I	5.49698e-40	93.62
4	AGAP011284	0	Eukaryotic translation initiation factor 5A [Source:UniProtKB/TrEMBL%3BAcc:Q7PSR5]	RTT	7.13501e-114	100
4	AGAP011298	RpL10a	60S ribosomal protein L10a [Source:VB Community Annotation]	RTT	5.68024e-85	100
4	AGAP011317	0	Unknown	U	1.41778e-40	85.11
4	AGAP011424	RpS16	40S ribosomal protein S16 [Source:VB Community Annotation]	RTT	8.03158e-120	100
4	AGAP011484	0	Ig-like	U	1.90195e-12	91.49
4	AGAP011504	0	protein transport protein SEC61 subunit beta [Source:VB Community Annotation]	TRP	4.86864e-36	93.62
4	AGAP011580	eIF3k	Eukaryotic translation initiation factor 3 subunit K [Source:UniProtKB/Swiss-Prot%3BAcc:Q7QGK4]	RTT	8.34571e-32	91.49
4	AGAP011629	0	dihydrolipoamide dehydrogenase [Source:VB Community Annotation]	M	4.22157e-22	82.98
4	AGAP011687	RpL27	60S ribosomal protein L27 [Source:UniProtKB/TrEMBL%3BAcc:Q5TMJ9]	RTT	9.32718e-104	100
4	AGAP011706	RpL27a	60S ribosomal protein L27a [Source:VB Community Annotation]	RTT	3.4588e-96	100
4	AGAP011777	RpSA	40S ribosomal protein SA [Source:UniProtKB/Swiss-Prot%3BAcc:Q7PZ81]	RTT	3.67369e-100	100
4	AGAP011800	0	Transaldolase [Source:UniProtKB/TrEMBL%3BAcc:Q7PZ95]	M	8.90604e-21	85.11
4	AGAP011802	RpL39	60S ribosomal protein L39 [Source:VB Community Annotation]	RTT	3.13153e-78	100
4	AGAP011828	Cp1	cathepsin L [Source:VB Community Annotation]	PROT	1.35365e-38	93.62
4	AGAP011832	0	Death-associated protein 1 [Source:VB Community Annotation]	D	4.04088e-36	85.11
4	AGAP011842	0	signal peptidase complex subunit 2 [Source:VB Community Annotation]	D	8.28733e-32	91.49
4	AGAP011859	0	Beta-glucuronidase [Source:UniProtKB/TrEMBL%3BAcc:Q7PZE2]	M	1.38512e-32	80.85
4	AGAP011896	RpL31	60S ribosomal protein L31 [Source:VB Community Annotation]	RTT	3.51001e-88	100
4	AGAP011940	0	sphingomyelin phosphodiesterase [Source:VB Community Annotation]	M	1.77313e-93	100
4	AGAP011974	SCRC1	Class C Scavenger Receptor (Sushi/SCR/CCP and Somatomedin B domains). [Source:VB Community Annotation]	I	6.91825e-121	97.87
4	AGAP012014	Arf1	ADP-ribosylation factor 1 [Source:VB Community Annotation]	D	4.01834e-39	100
4	AGAP012053	0	alpha%2Calpha-trehalase [Source:VB Community Annotation]	M	1.57424e-49	87.23
4	AGAP012056	0	cofilin [Source:VB Community Annotation]	CS	1.26851e-40	95.74
4	AGAP012081	0	F-type H+-transporting ATPase subunit beta [Source:VB Community Annotation]	TRP	2.07471e-31	93.62
4	AGAP012100	RpS26	40S ribosomal protein S26 [Source:UniProtKB/Swiss-Prot%3BAcc:Q9GT45]	RTT	1.73977e-108	100
4	AGAP012138	RpL21	60S ribosomal protein L21 [Source:VB Community Annotation]	RTT	1.03179e-104	100
4	AGAP012184	0	FK506-binding protein 1 [Source:VB Community Annotation]	U	7.46306e-49	100
4	AGAP012188	0	ubiquinol-cytochrome c reductase subunit 7 [Source:VB Community Annotation]	D	5.11189e-11	95.74
4	AGAP012281	eIF3m	Eukaryotic translation initiation factor 3 subunit M [Source:UniProtKB/Swiss-Prot%3BAcc:Q7Q068]	RTT	2.46011e-45	82.98
4	AGAP012284	RpL18a-1	60S ribosomal protein L18a [Source:UniProtKB/TrEMBL%3BAcc:Q7PV82]	RTT	5.62133e-117	100
4	AGAP012307	0	Spondin-1 [Source:VB Community Annotation]	D	4.94772e-126	100
4	AGAP012334	0	high mobility group protein D%2C isoform C [Source:VB Community Annotation]	D	1.65139e-30	97.87
4	AGAP012339	0	Translocase of outer mitochondrial membrane 20 homolog [Source:VB Community Annotation]	REDOX/STRESS/MIT	3.33593e-08	87.23
4	AGAP012374	0	NADH dehydrogenase (ubiquinone) 1 beta subcomplex 3 [Source:VB Community Annotation]	REDOX/STRESS/MIT	2.78313e-30	89.36
4	AGAP012386	Nim C2	Nimrod C2	I	7.239e-72	97.87
4	AGAP012407	0	protein disulfide-isomerase A1 [Source:VB Community Annotation]	D	1.66044e-107	97.87
4	AGAP012418	0	Unknown	U	3.51365e-10	95.74
4	AGAP012515	0	F-type H+-transporting ATPase subunit f [Source:VB Community Annotation]	TRP	5.65104e-26	95.74
4	AGAP012533	0	NADH dehydrogenase (ubiquinone) 1 alpha subcomplex 6 [Source:VB Community Annotation]	REDOX/STRESS/MIT	9.50817e-10	80.85
4	AGAP012674	0	Unknown	U	1.66606e-35	91.49
4	AGAP012708	0	Unknown	RTT	3.50604e-11	100
4	AGAP012755	0	ER lumen protein retaining receptor [Source:VB Community Annotation]	TRP	7.63011e-27	93.62
4	AGAP012885	0	Histone H4 [Source:UniProtKB/TrEMBL%3BAcc:Q7PCX0]	RTT	7.89066e-13	80.85
4	AGAP012956	0	Unknown	U	1.56985e-14	91.49
4	AGAP012990	RpS23	40S ribosomal protein S23 [Source:VB Community Annotation]	RTT	1.18862e-69	100
4	AGAP013092	0	cytochrome c oxidase subunit VIb polypeptide 1 [Source:VB Community Annotation]	REDOX/STRESS/MIT	1.35745e-19	89.36
4	AGAP013103	0	Anopheles-specific TM protein	U	2.64591e-57	100
4	AGAP013333	0	Phosphate carrier%2C mitochondrial [Source:VB Community Annotation]	U	3.73688e-80	100
4	AGAP013509	0	carboxylesterase clade H%2C member 1 [Source:VB Community Annotation]	REDOX/STRESS/MIT	6.54118e-96	100
4	AGAP013742	0	40S ribosomal protein S27a [Source:VB Community Annotation]	RTT	1.28443e-90	100
4	AGAP028015	0	LRR	U	2.32267e-05	85.11
4	AGAP028028	LRIM16A	leucine-rich immune protein (TM) [Source:VB Community Annotation]	I	9.93976e-100	100
4	AGAP028064	LRIM16B	leucine-rich immune protein (TM) [Source:VB Community Annotation]	I	4.42086e-56	97.87
4	AGAP028154	0	V-type proton ATPase proteolipid subunit [Source:UniProtKB/TrEMBL%3BAcc:A0A1S4HCY4]	TRP	1.06006e-59	100
4	AGAP028364	COX1	cytochrome c oxidase subunit I [Source:European Nucleotide Archive%3BAcc:COX1]	REDOX/STRESS/MIT	0.00165904	100
4	AGAP028439	0	Unknown	U	9.35247e-52	95.74
4	AGAP028464	0	Unknown	U	3.51821e-44	95.74
4	AGAP028693	RpS18	40S ribosomal protein S18 [Source:VB Community Annotation]	RTT	1.89524e-90	100
4	AGAP028876	SSU_rRNA_eukarya	Eukaryotic small subunit ribosomal RNA [Source:RFAM%3BAcc:RF01960]	RTT	6.95008e-13	93.62
4	AGAP028918	LSU_rRNA_eukarya	Eukaryotic large subunit ribosomal RNA [Source:RFAM%3BAcc:RF02543]	RTT	0.000110346	100
4	AGAP028978	SSU_rRNA_eukarya	Eukaryotic small subunit ribosomal RNA [Source:RFAM%3BAcc:RF01960]	RTT	0.000483283	93.62
4	AGAP028979	SSU_rRNA_eukarya	Eukaryotic small subunit ribosomal RNA [Source:RFAM%3BAcc:RF01960]	RTT	2.43655e-06	91.49
4	AGAP028980	SSU_rRNA_eukarya	Eukaryotic small subunit ribosomal RNA [Source:RFAM%3BAcc:RF01960]	RTT	0.000236237	97.87
4	AGAP028997	SSU_rRNA_eukarya	Eukaryotic small subunit ribosomal RNA [Source:RFAM%3BAcc:RF01960]	RTT	3.79697e-09	97.87
4	AGAP029038	SSU_rRNA_eukarya	Eukaryotic small subunit ribosomal RNA [Source:RFAM%3BAcc:RF01960]	RTT	2.13335e-11	97.87
4	AGAP029054	NimB2	nimrod B2 [Source:VB Community Annotation]	I	4.0532e-170	100
4	AGAP029055	eater	Eater	I	1.94647e-56	93.62
5	AGAP002076	0	heat shock 70kDa protein 1/8 [Source:VB Community Annotation]	REDOX/STRESS/MIT	0.000135141	81.58
5	AGAP007406	0	Elongation factor 1-alpha [Source:UniProtKB/TrEMBL%3BAcc:Q7PT29]	RTT	2.64906e-07	84.21
5	AGAP028360	ND2	NADH dehydrogenase subunit 2 [Source:European Nucleotide Archive%3BAcc:ND2]	REDOX/STRESS/MIT	2.24732e-148	97.37
5	AGAP028364	COX1	cytochrome c oxidase subunit I [Source:European Nucleotide Archive%3BAcc:COX1]	REDOX/STRESS/MIT	6.87667e-84	100
5	AGAP028366	COX2	cytochrome c oxidase subunit II [Source:European Nucleotide Archive%3BAcc:COX2]	REDOX/STRESS/MIT	3.17779e-92	100
5	AGAP028369	ATP8	adenosine triphosphatase subunit 8 [Source:European Nucleotide Archive%3BAcc:ATP8]	D	2.73413e-133	100
5	AGAP028370	ATP6	adenosine triphosphatase subunit 6 [Source:European Nucleotide Archive%3BAcc:ATP6]	D	4.46997e-88	100
5	AGAP028371	COX3	cytochrome c oxidase subunit III [Source:European Nucleotide Archive%3BAcc:COX3]	REDOX/STRESS/MIT	4.13079e-94	100
5	AGAP028373	ND3	NADH dehydrogenase subunit 3 [Source:European Nucleotide Archive%3BAcc:ND3]	REDOX/STRESS/MIT	2.58351e-134	97.37
5	AGAP028380	ND5	NADH dehydrogenase subunit 5 [Source:European Nucleotide Archive%3BAcc:ND5]	REDOX/STRESS/MIT	2.12561e-92	97.37
5	AGAP028382	ND4	NADH dehydrogenase subunit 4 [Source:European Nucleotide Archive%3BAcc:ND4]	REDOX/STRESS/MIT	3.83294e-71	94.74
5	AGAP028383	ND4L	NADH dehydrogenase subunit 4L [Source:European Nucleotide Archive%3BAcc:ND4L]	REDOX/STRESS/MIT	1.12647e-92	92.11
5	AGAP028386	ND6	NADH dehydrogenase subunit 6 [Source:European Nucleotide Archive%3BAcc:ND6]	REDOX/STRESS/MIT	2.6855e-156	100
5	AGAP028387	CYTB	cytochrome b [Source:European Nucleotide Archive%3BAcc:CYTB]	REDOX/STRESS/MIT	3.56814e-99	100
5	AGAP028389	ND1	NADH dehydrogenase subunit 1 [Source:European Nucleotide Archive%3BAcc:ND1]	REDOX/STRESS/MIT	6.15448e-90	94.74
5	AGAP028391	lsu rRNA	lsu rRNA	RTT	6.00573e-102	100
5	AGAP028393	ssu rRNA	ssu rRNA	RTT	3.10234e-68	97.37
6	AGAP000249	0	mannosyl-glycoprotein endo-beta-N-acetylglucosaminidase [Source:VB Community Annotation]	M	5.38465e-19	86.05
6	AGAP000305	0	SPARC [Source:VB Community Annotation]	D	4.19974e-90	97.67
6	AGAP000376	Tsf1	transferrin 1	I	5.08359e-25	97.67
6	AGAP000541	RpS15a-1	40S ribosomal protein S15a [Source:VB Community Annotation]	RTT	1.34696e-43	95.35
6	AGAP000651	Actin5C	Actin-5C [Source:UniProtKB/Swiss-Prot%3BAcc:P84185]	CS	1.99642e-41	100
6	AGAP000654	RpS30	40S ribosomal protein S30 [Source:UniProtKB/TrEMBL%3BAcc:Q7QEH2]	RTT	2.3934e-56	100
6	AGAP000655	RpS14-1	40S ribosomal protein S14a [Source:UniProtKB/Swiss-Prot%3BAcc:Q7QEH1]	RTT	2.12191e-32	93.02
6	AGAP000739	RpS10	40S ribosomal protein S10 [Source:VB Community Annotation]	RTT	5.15106e-55	97.67
6	AGAP000790	0	Calycin-like	U	3.6777e-38	88.37
6	AGAP000883	0	elongation factor 1-gamma [Source:VB Community Annotation]	RTT	4.8767e-18	81.4
6	AGAP000927	0	myosin regulatory light chain%2C invertebrate [Source:VB Community Annotation]	CS	2.44209e-28	83.72
6	AGAP000952	RpL37	60S ribosomal protein L37 [Source:VB Community Annotation]	RTT	4.84609e-62	100
6	AGAP000953	RpL10-1	60S ribosomal protein L10-1 [Source:VB Community Annotation]	RTT	2.13659e-42	93.02
6	AGAP001274	RpS15	40S ribosomal protein S15 [Source:VB Community Annotation]	RTT	1.76109e-64	97.67
6	AGAP001381	0	laminin%2C beta 1 [Source:VB Community Annotation]	CS	1.27401e-11	81.4
6	AGAP001408	RpL35	60S ribosomal protein L35 [Source:VB Community Annotation]	RTT	2.10358e-58	95.35
6	AGAP001459	RpL17	60S ribosomal protein L17 [Source:UniProtKB/Swiss-Prot%3BAcc:A0NGY0]	RTT	9.9794e-73	100
6	AGAP001595	RpS29	40S ribosomal protein S29 [Source:VB Community Annotation]	RTT	2.84564e-43	90.7
6	AGAP001662	0	ADAM-TS Spacer 1	U	7.79912e-25	90.7
6	AGAP001805	RpL13	60S ribosomal protein L13 [Source:UniProtKB/TrEMBL%3BAcc:Q7PUQ7]	RTT	9.71971e-41	100
6	AGAP001813	0	Histone H3 [Source:UniProtKB/TrEMBL%3BAcc:Q7PUQ8]	RTT	6.74996e-29	81.4
6	AGAP001910	RpS3	40S ribosomal protein S3 [Source:VB Community Annotation]	RTT	4.88259e-46	95.35
6	AGAP001911	RpL6	60S ribosomal protein L6 [Source:VB Community Annotation]	RTT	4.75197e-34	93.02
6	AGAP002076	0	heat shock 70kDa protein 1/8 [Source:VB Community Annotation]	REDOX/STRESS/MIT	1.75456e-71	100
6	AGAP002122	RpL32	60S ribosomal protein L32 [Source:VB Community Annotation]	RTT	5.67209e-57	95.35
6	AGAP002306	RpL4	60S ribosomal protein L4 [Source:VB Community Annotation]	RTT	1.22082e-50	97.67
6	AGAP002346	RpS14-2	40S ribosomal protein S14b [Source:UniProtKB/Swiss-Prot%3BAcc:Q7QBX2]	RTT	1.40874e-50	93.02
6	AGAP002395	RpL10-2	60S ribosomal protein L10-2 [Source:VB Community Annotation]	RTT	9.67081e-55	97.67
6	AGAP002437	RpS8	40S ribosomal protein S8 [Source:UniProtKB/TrEMBL%3BAcc:Q7QC42]	RTT	5.92021e-61	100
6	AGAP002464	0	secreted ferritin G subunit [Source:VB Community Annotation]	D	9.55028e-42	95.35
6	AGAP002465	0	ferritin heavy chain [Source:VB Community Annotation]	D	2.59113e-17	90.7
6	AGAP002468	RpL26	60S ribosomal protein L26 [Source:VB Community Annotation]	RTT	1.36481e-88	100
6	AGAP002667	Tctp	Translationally-controlled tumor protein homolog [Source:UniProtKB/Swiss-Prot%3BAcc:Q7QCK2]	RTT	1.40005e-32	95.35
6	AGAP002754	RpL35a	60S ribosomal protein L35a [Source:VB Community Annotation]	RTT	3.265e-41	97.67
6	AGAP002919	RpS6	40S ribosomal protein S6 [Source:VB Community Annotation]	RTT	4.15599e-34	97.67
6	AGAP002921	RpL36	60S ribosomal protein L36 [Source:UniProtKB/TrEMBL%3BAcc:Q7PQY8]	RTT	2.2254e-80	100
6	AGAP003025	RpLp2	60S ribosomal protein LP2 [Source:VB Community Annotation]	RTT	1.92961e-65	97.67
6	AGAP003412	RpS28	40S ribosomal protein S28 [Source:VB Community Annotation]	RTT	9.40462e-37	86.05
6	AGAP003532	RpS3a	40S ribosomal protein S3a [Source:UniProtKB/Swiss-Prot%3BAcc:P52813]	RTT	1.78494e-78	100
6	AGAP003538	RpL36a	60S ribosomal protein L36a [Source:VB Community Annotation]	RTT	1.59433e-82	100
6	AGAP003556	RpL3	60S ribosomal protein L3 [Source:VB Community Annotation]	RTT	4.03704e-26	97.67
6	AGAP003592	RpLP0	60S ribosomal protein LP0 [Source:VB Community Annotation]	RTT	1.70849e-56	100
6	AGAP003768	RpS2	40S ribosomal protein S2 [Source:VB Community Annotation]	RTT	6.56309e-61	100
6	AGAP003816	RpL30	60S ribosomal protein L30 [Source:VB Community Annotation]	RTT	5.50775e-38	97.67
6	AGAP004016	0	Leucine-rich repeats (LRRs)	U	3.32785e-23	83.72
6	AGAP004212	Crc	calreticulin [Source:VB Community Annotation]	TRP	1.46499e-18	95.35
6	AGAP004349	0	K homology RNA-binding domain	U	1.51065e-40	86.05
6	AGAP004395	0	nucleophosmin 3 [Source:VB Community Annotation]	D	1.12203e-20	81.4
6	AGAP004422	RpL19	60S ribosomal protein L19 [Source:VB Community Annotation]	RTT	4.6878e-70	100
6	AGAP004462	RpS25	40S ribosomal protein S25 [Source:VB Community Annotation]	RTT	9.49146e-57	100
6	AGAP004887	RpS17	40S ribosomal protein S17 [Source:UniProtKB/Swiss-Prot%3BAcc:Q9U9L1]	RTT	2.62979e-72	100
6	AGAP004919	RpL15	60S ribosomal protein L15 [Source:UniProtKB/Swiss-Prot%3BAcc:P52818]	RTT	7.78445e-49	95.35
6	AGAP004936	0	EGF repeats	D	1.02411e-26	97.67
6	AGAP004993	0	laminin subunit alpha [Source:VB Community Annotation]	CS	9.96514e-16	93.02
6	AGAP005046	RpL22	60S ribosomal protein L22 [Source:VB Community Annotation]	RTT	6.15713e-61	100
6	AGAP005061	RpS9	40S ribosomal protein S9 [Source:VB Community Annotation]	RTT	2.04177e-50	100
6	AGAP005131	RpS24	40S ribosomal protein S24 [Source:UniProtKB/TrEMBL%3BAcc:Q7PQ02]	RTT	9.8897e-83	100
6	AGAP005427	RpL28	60S ribosomal protein L28 [Source:VB Community Annotation]	RTT	1.77197e-62	100
6	AGAP005802	RpL8	60S ribosomal protein L8 [Source:UniProtKB/Swiss-Prot%3BAcc:Q9U9L2]	RTT	1.3008e-64	100
6	AGAP005947	RpS13	40S ribosomal protein S13 [Source:UniProtKB/Swiss-Prot%3BAcc:P52811]	RTT	5.73225e-74	97.67
6	AGAP005960	RpL7a	60S ribosomal protein L7a [Source:UniProtKB/Swiss-Prot%3BAcc:O76732]	RTT	9.71863e-65	97.67
6	AGAP005991	RpL14	60S ribosomal protein L14 [Source:VB Community Annotation]	RTT	8.28481e-64	100
6	AGAP006037	RpL24	60S ribosomal protein L24 [Source:VB Community Annotation]	RTT	1.83293e-67	100
6	AGAP006459	SUI1	Protein translation factor SUI1 homolog [Source:UniProtKB/Swiss-Prot%3BAcc:P42678]	D	2.91037e-26	88.37
6	AGAP006612	RpL29	60S ribosomal protein L29 [Source:VB Community Annotation]	RTT	1.79753e-61	97.67
6	AGAP006614	0	transcription factor BTF3 homolog 4 [Source:VB Community Annotation]	RTT	5.56858e-35	95.35
6	AGAP006766	0	nascent polypeptide-associated complex subunit alpha [Source:VB Community Annotation]	U	2.99378e-09	83.72
6	AGAP006782	0	ADP%2CATP carrier protein 1 [Source:VB Community Annotation]	TRP	9.55984e-23	93.02
6	AGAP006871	RpS4	40S ribosomal protein S4 [Source:UniProtKB/TrEMBL%3BAcc:Q7PT95]	RTT	2.60616e-59	97.67
6	AGAP006958	Hsp83	Heat shock protein 83 [Source:UniProtKB/Swiss-Prot%3BAcc:Q7PT10]	REDOX/STRESS/MIT	3.49262e-11	86.05
6	AGAP007087	RpL41	60s ribosomal protein L41 [Source:UniProtKB/TrEMBL%3BAcc:Q52P89]	RTT	5.68441e-79	100
6	AGAP007088	0	peptidyl-prolyl cis-trans isomerase B (cyclophilin B) [Source:VB Community Annotation]	D	1.30218e-21	81.4
6	AGAP007120	0	nucleoside-diphosphate kinase [Source:VB Community Annotation]	D	1.93454e-34	88.37
6	AGAP007157	RpS27	40S ribosomal protein S27 [Source:UniProtKB/TrEMBL%3BAcc:Q7PT96]	RTT	2.37689e-60	97.67
6	AGAP007406	0	Elongation factor 1-alpha [Source:UniProtKB/TrEMBL%3BAcc:Q7PT29]	RTT	1.89791e-49	100
6	AGAP007580	RpL18	60S ribosomal protein L18 [Source:UniProtKB/Swiss-Prot%3BAcc:Q7QJM5]	RTT	2.09324e-85	95.35
6	AGAP007629	LANB2	laminin gamma 1 [Source:VB Community Annotation]	CS	1.20728e-13	86.05
6	AGAP007643	0	Tyrosine 3-monooxygenase/tryptophan 5-monooxygenase activation protein%2C beta polypeptide 2 [Source:VB Community Annotation]	D	6.25814e-11	83.72
6	AGAP007740	RpLP1	60S ribosomal protein LP1 [Source:VB Community Annotation]	RTT	1.08214e-90	100
6	AGAP007927	RpL40	60S ribosomal protein L40 [Source:VB Community Annotation]	RTT	2.72444e-58	97.67
6	AGAP008075	0	cellular nucleic acid-binding protein [Source:VB Community Annotation]	D	4.09473e-05	81.4
6	AGAP008329	RpS5	40S ribosomal protein S5 [Source:VB Community Annotation]	RTT	3.94928e-81	100
6	AGAP008916	RpL7	60S ribosomal protein L7 [Source:VB Community Annotation]	RTT	5.33446e-56	100
6	AGAP009031	RpL5	60S ribosomal protein L5 [Source:VB Community Annotation]	RTT	1.25297e-71	95.35
6	AGAP009200	0	collagen type IV alpha [Source:VB Community Annotation]	CS	6.80761e-59	97.67
6	AGAP009201	0	collagen type IV alpha [Source:VB Community Annotation]	CS	3.3827e-40	93.02
6	AGAP009324	RpL34	60S ribosomal protein L34 [Source:VB Community Annotation]	RTT	7.74852e-75	100
6	AGAP009431	RpS21	40S ribosomal protein S21 [Source:UniProtKB/TrEMBL%3BAcc:Q7PTN4]	RTT	3.10561e-58	100
6	AGAP009441	0	elongation factor 2 [Source:VB Community Annotation]	RTT	7.48641e-27	97.67
6	AGAP009508	RpL9	60S ribosomal protein L9 [Source:VB Community Annotation]	RTT	1.94319e-95	100
6	AGAP009584	TRX1	Thioredoxin [Source:UniProtKB/TrEMBL%3BAcc:Q9NGZ1]	REDOX/STRESS/MIT	7.30172e-17	81.4
6	AGAP009861	0	Profilin protein [Source:VB Community Annotation]	CS	1.29081e-15	90.7
6	AGAP009920	RpL37a	60S ribosomal protein L37a [Source:VB Community Annotation]	RTT	9.3414e-84	97.67
6	AGAP009998	RpS11	40S ribosomal protein S11 [Source:UniProtKB/Swiss-Prot%3BAcc:P52812]	RTT	1.04268e-64	100
6	AGAP010065	RpL12	60S ribosomal protein L12 [Source:VB Community Annotation]	RTT	1.76436e-55	97.67
6	AGAP010163	RpL38	60S ribosomal protein L38 [Source:UniProtKB/Swiss-Prot%3BAcc:Q7Q0U1]	RTT	1.15567e-71	100
6	AGAP010173	Rack1	guanine nucleotide-binding protein subunit beta-like protein [Source:VB Community Annotation]	D	2.33235e-31	93.02
6	AGAP010216	RpL25	60S ribosomal protein L25 [Source:VB Community Annotation]	RTT	6.72264e-38	88.37
6	AGAP010252	RpL23	60S ribosomal protein L23 [Source:VB Community Annotation]	RTT	5.66813e-82	97.67
6	AGAP010257	RpL13a	60S ribosomal protein L13a [Source:VB Community Annotation]	RTT	7.61953e-43	100
6	AGAP010591	RpS20	40S ribosomal protein S20 [Source:VB Community Annotation]	RTT	5.26944e-46	97.67
6	AGAP010592	S7	40S ribosomal protein S7 [Source:UniProtKB/Swiss-Prot%3BAcc:P33514]	RTT	2.13706e-54	93.02
6	AGAP010727	0	Mucin	U	9.06691e-14	83.72
6	AGAP010933	RpS19	40S ribosomal protein S19 [Source:VB Community Annotation]	RTT	5.7524e-71	95.35
6	AGAP011054	TPX2	thioredoxin peroxidase 2 [Source:VB Community Annotation]	I	5.7324e-33	86.05
6	AGAP011077	RpS12	40S ribosomal protein S12 [Source:UniProtKB/TrEMBL%3BAcc:Q7PSP8]	RTT	4.09898e-37	97.67
6	AGAP011092	0	Polyadenylate-binding protein [Source:UniProtKB/TrEMBL%3BAcc:Q7QH99]	D	9.65952e-17	83.72
6	AGAP011173	RpL11	60S ribosomal protein L11 [Source:VB Community Annotation]	RTT	1.51507e-71	97.67
6	AGAP011197	FBN9	FBN9	I	4.07969e-15	95.35
6	AGAP011284	0	Eukaryotic translation initiation factor 5A [Source:UniProtKB/TrEMBL%3BAcc:Q7PSR5]	RTT	3.49091e-61	90.7
6	AGAP011298	RpL10a	60S ribosomal protein L10a [Source:VB Community Annotation]	RTT	4.19287e-34	95.35
6	AGAP011424	RpS16	40S ribosomal protein S16 [Source:VB Community Annotation]	RTT	3.26185e-76	97.67
6	AGAP011687	RpL27	60S ribosomal protein L27 [Source:UniProtKB/TrEMBL%3BAcc:Q5TMJ9]	RTT	2.46685e-65	100
6	AGAP011706	RpL27a	60S ribosomal protein L27a [Source:VB Community Annotation]	RTT	3.15413e-77	97.67
6	AGAP011777	RpSA	40S ribosomal protein SA [Source:UniProtKB/Swiss-Prot%3BAcc:Q7PZ81]	RTT	5.25663e-51	100
6	AGAP011802	RpL39	60S ribosomal protein L39 [Source:VB Community Annotation]	RTT	1.59419e-63	95.35
6	AGAP011896	RpL31	60S ribosomal protein L31 [Source:VB Community Annotation]	RTT	3.12844e-41	97.67
6	AGAP011974	SCRC1	Class C Scavenger Receptor (Sushi/SCR/CCP and Somatomedin B domains). [Source:VB Community Annotation]	I	1.23231e-23	88.37
6	AGAP012014	Arf1	ADP-ribosylation factor 1 [Source:VB Community Annotation]	D	2.88767e-08	88.37
6	AGAP012100	RpS26	40S ribosomal protein S26 [Source:UniProtKB/Swiss-Prot%3BAcc:Q9GT45]	RTT	5.98336e-68	100
6	AGAP012138	RpL21	60S ribosomal protein L21 [Source:VB Community Annotation]	RTT	3.64104e-67	95.35
6	AGAP012284	RpL18a-1	60S ribosomal protein L18a [Source:UniProtKB/TrEMBL%3BAcc:Q7PV82]	RTT	6.32333e-78	95.35
6	AGAP012334	0	high mobility group protein D%2C isoform C [Source:VB Community Annotation]	D	7.91091e-18	83.72
6	AGAP012708	0	Unknown	RTT	1.70611e-08	90.7
6	AGAP012956	0	Unknown	U	6.83068e-09	86.05
6	AGAP012990	RpS23	40S ribosomal protein S23 [Source:VB Community Annotation]	RTT	2.46889e-47	100
6	AGAP013742	0	40S ribosomal protein S27a [Source:VB Community Annotation]	RTT	1.23186e-63	97.67
6	AGAP028028	LRIM16A	leucine-rich immune protein (TM) [Source:VB Community Annotation]	I	2.93204e-19	83.72
6	AGAP028154	0	V-type proton ATPase proteolipid subunit [Source:UniProtKB/TrEMBL%3BAcc:A0A1S4HCY4]	TRP	8.7099e-23	93.02
6	AGAP028360	ND2	NADH dehydrogenase subunit 2 [Source:European Nucleotide Archive%3BAcc:ND2]	REDOX/STRESS/MIT	8.40036e-59	100
6	AGAP028364	COX1	cytochrome c oxidase subunit I [Source:European Nucleotide Archive%3BAcc:COX1]	REDOX/STRESS/MIT	1.12588e-44	100
6	AGAP028366	COX2	cytochrome c oxidase subunit II [Source:European Nucleotide Archive%3BAcc:COX2]	REDOX/STRESS/MIT	1.28335e-49	100
6	AGAP028369	ATP8	adenosine triphosphatase subunit 8 [Source:European Nucleotide Archive%3BAcc:ATP8]	D	1.51639e-44	100
6	AGAP028370	ATP6	adenosine triphosphatase subunit 6 [Source:European Nucleotide Archive%3BAcc:ATP6]	D	1.05953e-42	100
6	AGAP028371	COX3	cytochrome c oxidase subunit III [Source:European Nucleotide Archive%3BAcc:COX3]	REDOX/STRESS/MIT	3.90799e-51	100
6	AGAP028373	ND3	NADH dehydrogenase subunit 3 [Source:European Nucleotide Archive%3BAcc:ND3]	REDOX/STRESS/MIT	1.10336e-69	100
6	AGAP028380	ND5	NADH dehydrogenase subunit 5 [Source:European Nucleotide Archive%3BAcc:ND5]	REDOX/STRESS/MIT	1.01924e-47	100
6	AGAP028382	ND4	NADH dehydrogenase subunit 4 [Source:European Nucleotide Archive%3BAcc:ND4]	REDOX/STRESS/MIT	3.5995e-49	100
6	AGAP028383	ND4L	NADH dehydrogenase subunit 4L [Source:European Nucleotide Archive%3BAcc:ND4L]	REDOX/STRESS/MIT	7.00232e-52	100
6	AGAP028386	ND6	NADH dehydrogenase subunit 6 [Source:European Nucleotide Archive%3BAcc:ND6]	REDOX/STRESS/MIT	4.18295e-70	100
6	AGAP028387	CYTB	cytochrome b [Source:European Nucleotide Archive%3BAcc:CYTB]	REDOX/STRESS/MIT	5.94861e-50	100
6	AGAP028389	ND1	NADH dehydrogenase subunit 1 [Source:European Nucleotide Archive%3BAcc:ND1]	REDOX/STRESS/MIT	1.54789e-50	97.67
6	AGAP028391	lsu rRNA	lsu rRNA	U	7.85981e-65	100
6	AGAP028393	ssu rRNA	ssu rRNA	U	5.74821e-25	95.35
6	AGAP028693	RpS18	40S ribosomal protein S18 [Source:VB Community Annotation]	RTT	8.38801e-53	97.67
6	AGAP028825	LSU_rRNA_eukarya	Eukaryotic large subunit ribosomal RNA [Source:RFAM%3BAcc:RF02543]	RTT	6.34718e-25	100
6	AGAP028876	SSU_rRNA_eukarya	Eukaryotic small subunit ribosomal RNA [Source:RFAM%3BAcc:RF01960]	RTT	7.37702e-27	88.37
6	AGAP028918	LSU_rRNA_eukarya	Eukaryotic large subunit ribosomal RNA [Source:RFAM%3BAcc:RF02543]	RTT	6.70519e-15	100
6	AGAP028925	LSU_rRNA_eukarya	Eukaryotic large subunit ribosomal RNA [Source:RFAM%3BAcc:RF02543]	RTT	7.24376e-08	81.4
6	AGAP028941	LSU_rRNA_eukarya	Eukaryotic large subunit ribosomal RNA [Source:RFAM%3BAcc:RF02543]	RTT	2.9835e-18	100
6	AGAP028970	LSU_rRNA_eukarya	Eukaryotic large subunit ribosomal RNA [Source:RFAM%3BAcc:RF02543]	RTT	1.05178e-25	88.37
6	AGAP029038	SSU_rRNA_eukarya	Eukaryotic small subunit ribosomal RNA [Source:RFAM%3BAcc:RF01960]	RTT	1.48718e-20	83.72
6	AGAP029054	NimB2	nimrod B2 [Source:VB Community Annotation]	I	4.43473e-62	97.67
7	AGAP003656	0	Terribly reduced optic lobes%2C isoform B [Source:VB Community Annotation]	D	1.9672e-71	81.58
7	AGAP004203	Vg	vitellogenin [Source:VB Community Annotation]	TRP	3.11511e-45	89.47
7	AGAP007563	0	Unknown	CS	4.31372e-123	86.84
7	AGAP009554	0	Nuclear envelope localisation domain	CS	0.000619207	84.21
7	AGAP028360	ND2	NADH dehydrogenase subunit 2 [Source:European Nucleotide Archive%3BAcc:ND2]	REDOX/STRESS/MIT	3.44885e-27	81.58
7	AGAP028364	COX1	cytochrome c oxidase subunit I [Source:European Nucleotide Archive%3BAcc:COX1]	REDOX/STRESS/MIT	2.03443e-18	100
7	AGAP028366	COX2	cytochrome c oxidase subunit II [Source:European Nucleotide Archive%3BAcc:COX2]	REDOX/STRESS/MIT	4.63161e-25	94.74
7	AGAP028369	ATP8	adenosine triphosphatase subunit 8 [Source:European Nucleotide Archive%3BAcc:ATP8]	D	3.6507e-29	81.58
7	AGAP028370	ATP6	adenosine triphosphatase subunit 6 [Source:European Nucleotide Archive%3BAcc:ATP6]	D	1.65246e-28	97.37
7	AGAP028371	COX3	cytochrome c oxidase subunit III [Source:European Nucleotide Archive%3BAcc:COX3]	REDOX/STRESS/MIT	6.36038e-23	97.37
7	AGAP028373	ND3	NADH dehydrogenase subunit 3 [Source:European Nucleotide Archive%3BAcc:ND3]	REDOX/STRESS/MIT	3.65182e-31	86.84
7	AGAP028380	ND5	NADH dehydrogenase subunit 5 [Source:European Nucleotide Archive%3BAcc:ND5]	REDOX/STRESS/MIT	1.2295e-17	89.47
7	AGAP028382	ND4	NADH dehydrogenase subunit 4 [Source:European Nucleotide Archive%3BAcc:ND4]	REDOX/STRESS/MIT	1.64936e-16	89.47
7	AGAP028383	ND4L	NADH dehydrogenase subunit 4L [Source:European Nucleotide Archive%3BAcc:ND4L]	REDOX/STRESS/MIT	1.49699e-20	84.21
7	AGAP028386	ND6	NADH dehydrogenase subunit 6 [Source:European Nucleotide Archive%3BAcc:ND6]	REDOX/STRESS/MIT	2.03339e-27	86.84
7	AGAP028387	CYTB	cytochrome b [Source:European Nucleotide Archive%3BAcc:CYTB]	REDOX/STRESS/MIT	5.47648e-24	100
7	AGAP028389	ND1	NADH dehydrogenase subunit 1 [Source:European Nucleotide Archive%3BAcc:ND1]	REDOX/STRESS/MIT	1.94228e-22	89.47
7	AGAP028391	lsu rRNA	lsu rRNA	RTT	2.3414e-26	94.74
7	AGAP028918	LSU_rRNA_eukarya	Eukaryotic large subunit ribosomal RNA [Source:RFAM%3BAcc:RF02543]	RTT	0.00123352	100
7	AGAP028941	LSU_rRNA_eukarya	Eukaryotic large subunit ribosomal RNA [Source:RFAM%3BAcc:RF02543]	RTT	1.52047e-05	100
7	AGAP028973	LSU_rRNA_eukarya	Eukaryotic large subunit ribosomal RNA [Source:RFAM%3BAcc:RF02543]	RTT	9.74625e-94	89.47
7	AGAP029036	LSU_rRNA_eukarya	Eukaryotic large subunit ribosomal RNA [Source:RFAM%3BAcc:RF02543]	RTT	1.68777e-51	92.11
8	AGAP000009	0	syntaxin-binding protein [Source:VB Community Annotation]	TRP	3.17162e-51	83.33
8	AGAP000969	0	tropomodulin [Source:VB Community Annotation]	D	0.000289917	87.5
8	AGAP001082	0	saposin [Source:VB Community Annotation]	D	6.88347e-07	83.33
8	AGAP001085	0	Unknown	U	2.66854e-76	83.33
8	AGAP001099	0	Polybromo-1 [Source:VB Community Annotation]	D	1.65238e-37	83.33
8	AGAP001157	0	E3 ubiquitin-protein ligase UBR4 [Source:VB External Description;Acc:AGAP001157]	D	4.9737e-19	87.5
8	AGAP001194	0	Unknown	CS	4.92093e-80	83.33
8	AGAP001394	0	synaptosomal-associated protein%2C 23kDa [Source:VB Community Annotation]	TRP	7.44287e-18	83.33
8	AGAP001446	0	AMP-activated protein kinase%2C gamma regulatory subunit [Source:VB Community Annotation]	REDOX/STRESS/MIT	3.46248e-73	87.5
8	AGAP001566	0	Unknown	U	1.14676e-105	87.5
8	AGAP001582	0	painless/TRPA Channel	CS	5.13237e-10	87.5
8	AGAP001660	0	ciliary dynein heavy chain [Source:VB Community Annotation]	CS	1.60214e-51	91.67
8	AGAP001678	0	Unknown	TRP	1.31648e-111	91.67
8	AGAP001683	0	calcium/calmodulin-dependent serine protein kinase [Source:VB Community Annotation]	D	9.20707e-66	91.67
8	AGAP001690	0	regulating synaptic membrane exocytosis protein 2 [Source:VB Community Annotation]	U	7.57489e-120	100
8	AGAP001751	0	Oxidation resistance protein [Source:VB Community Annotation]	D	1.8751e-98	87.5
8	AGAP001797	0	Tropomyosin 1 [Source:VB Community Annotation]	CS	4.66179e-05	87.5
8	AGAP001824	0	Unknown	U	1.63057e-88	91.67
8	AGAP002104	0	Unknown	U	5.2846e-118	87.5
8	AGAP002488	0	REST corepressor [Source:VB Community Annotation]	D	2.20968e-52	87.5
8	AGAP002578	0	Unknown	TRP	1.20143e-77	91.67
8	AGAP002737	0	Immunoglobulin I-set domain.	I	1.60301e-31	87.5
8	AGAP002832	0	protein-tyrosine phosphatase [Source:VB Community Annotation]	D	2.48043e-29	83.33
8	AGAP002858	0	Sodium/potassium-transporting ATPase subunit alpha [Source:UniProtKB/TrEMBL%3BAcc:F5HKJ1]	TRP	0.00024571	87.5
8	AGAP002942	0	Unknown	U	6.37727e-35	87.5
8	AGAP003331	0	Enolase-phosphatase E1 [Source:VB Community Annotation]	M	9.86632e-35	83.33
8	AGAP003439	0	Zinc finger, FLYWCH-type	D	2.84612e-39	95.83
8	AGAP003509	0	Complexin%2C isoform V [Source:VB Community Annotation]	D	4.52156e-57	83.33
8	AGAP003656	0	Terribly reduced optic lobes%2C isoform B [Source:VB Community Annotation]	D	2.7337e-98	91.67
8	AGAP003709	0	potassium large conductance calcium-activated channel subfamily M alpha member [Source:VB Community Annotation]	TRP	1.11549e-155	100
8	AGAP003735	0	Unknown	D	6.00232e-17	83.33
8	AGAP003914	0	Unknown	D	4.47048e-06	83.33
8	AGAP003945	0	olypyrimidine tract-binding protein 2 [Source:VB Community Annotation]	M	7.13431e-84	91.67
[truncated: 96 more rows]
