# Supplementary material for: Single-cell analysis of mosquito hemocytes identifies signatures of immune cell subtypes and cell differentiation
Source: eLife. 2021 Jul 28;10:e66192. doi: 10.7554/eLife.66192 (PMC8376254; doi:10.7554/eLife.66192)
Supplement: Supplementary file 5. [file elife-66192-supp5.xlsx]

## Sheet: Sheet1
Gene ID	Gene Name	Annotation	GO term	Cluster 1	Cluster 2	Cluster 3	Cluster 4	Cluster 5	Cluster 6	Cluster 7	Cluster 8
AGAP000651	Actin5C	Actin-5C [Source:UniProtKB/Swiss-Prot%3BAcc:P84185]	CS	10.0125	12.1084	11.1305	11.4739	4.80677	10.2401	5.35297	3.99331
AGAP009861		Profilin protein [Source:VB Community Annotation]	CS	9.55308	11.6492	10.5711	10.9162	2.62911	7.91468	4.74812	4.54632
AGAP000927		myosin regulatory light chain%2C invertebrate [Source:VB Community Annotation]	CS	9.19175	10.2321	9.84034	10.0421	2.61615	7.82839	1.75752	1.62515
AGAP009200		collagen type IV alpha [Source:VB Community Annotation]	CS	9.19251	9.60644	9.95605	9.54499	2.10149	7.74686	2.28005	1.30479
AGAP012056		cofilin [Source:VB Community Annotation]	CS	8.77569	10.4082	8.61797	9.20072	2.31864	7.32355	1.07064	4.2484
AGAP001381		laminin%2C beta 1 [Source:VB Community Annotation]	CS	8.41116	9.48876	9.40439	9.1907	1.54317	4.86542	1.86162	2.59897
AGAP010510		Tubulin beta chain [Source:UniProtKB/TrEMBL%3BAcc:Q7PPR6]	CS	7.67284	8.27558	7.94188	8.35344	1.59014	4.6317	2.01998	2.12435
AGAP009201		collagen type IV alpha [Source:VB Community Annotation]	CS	7.78104	8.03993	8.54128	8.10974	1.26571	6.1331	0.945352	1.07449
AGAP007629	LANB2	laminin gamma 1 [Source:VB Community Annotation]	CS	7.92379	8.24841	8.43338	7.76613	1.10898	4.63438	1.24185	2.53729
AGAP005849		colmedin [Source:VB Community Annotation]	CS	6.52013	7.40506	8.40737	7.69086	1.50041	3.27756	2.72572	3.31941
AGAP004993		laminin subunit alpha [Source:VB Community Annotation]	CS	6.97286	7.90932	8.28403	7.59168	1.65992	5.66175	2.73992	4.19008
AGAP002685	APG8	autophagy related gene [Source:VB Community Annotation]	CS	7.95206	5.49031	9.33145	6.96639	1.57121	2.71325	1.68137	3.30097
AGAP000235		Thymosin [Source:VB Community Annotation]	CS	7.10371	7.67504	6.90564	6.74599	1.57953	4.97071	3.08815	2.14735
AGAP004886		microtubule-associated protein%2C RP/EB family [Source:VB Community Annotation]	CS	4.63241	7.47619	4.88622	6.37246	0.745714	2.92422	3.09208	4.79478
AGAP001797		Tropomyosin 1 [Source:VB Community Annotation]	CS	4.784	6.14587	5.74478	5.98748	1.076	4.13034	3.4219	4.80449
AGAP010929	tubB	Tubulin beta chain [Source:UniProtKB/TrEMBL%3BAcc:Q7PSI4]	CS	4.12904	7.64241	5.48042	5.73097	1.45306	2.31448	0.803551	0.67683
AGAP003721	ANXB10B	annexin B10B [Source:VB Community Annotation]	CS	5.03305	6.0844	6.7618	5.58873	0.0662163	2.22592	1.20552	0.578535
AGAP000889		Coactosin-like protein [Source:VB Community Annotation]	CS	4.16147	7.5673	3.05629	5.10028	0.568075	1.51741	1.60542	2.56372
AGAP005110	Actincytosk	Arp3	CS	3.44974	7.55675	5.24317	5.01614	0.736273	1.87389	0.904184	1.91798
AGAP007806		myosin light chain%2C invertebrate [Source:VB Community Annotation]	CS	5.5546	5.98656	4.3046	4.96477	0.707537	1.1975	1.16637	2.56645
AGAP001335		dynein light chain LC8-type [Source:VB Community Annotation]	CS	3.69875	7.21042	3.61003	4.91443	0.329264	2.0406	1.70279	3.44993
AGAP011938		lamin [Source:VB Community Annotation]	CS	2.80727	6.65725	3.18061	4.82681	0.153994	1.54148	0.6558	2.15413
AGAP001306		actin related protein 2/3 complex%2C subunit 4 [Source:VB Community Annotation]	CS	3.85923	5.39168	4.10167	4.77407	0.159609	1.86774	1.05148	1.50287
AGAP008908		actin-related protein 2/3 complex subunit 1A [Source:VB Community Annotation]	CS	4.20939	6.19548	4.35321	4.74553	0.0882413	1.56988	0.873383	0.220165
AGAP009154	ARC-P34	actin-related protein 2/3 complex subunit 2 [Source:VB Community Annotation]	CS	4.15803	6.51601	2.94834	4.6941	0.129702	2.76225	2.18768	3.09101
AGAP004626		actin binding	CS	6.25694	6.07487	4.61251	4.66277	0.166908	2.0292	3.02827	5.86493
AGAP002645		septin 2 [Source:VB Community Annotation]	CS	4.58301	6.41811	1.79046	4.51231	0.388404	1.27525	2.42047	2.80986
AGAP000815	INTB	integrin beta subunit [Source:VB Community Annotation]	CS	4.28899	5.42324	3.83394	4.48793	0.615072	1.82982	0.638143	3.11198
AGAP001313		Muscular protein 20 [Source:VB Community Annotation]	CS	4.5489	5.88572	4.49205	4.47259	0.217808	1.82672	1.05049	1.62938
AGAP003720		annexin A4 [Source:VB Community Annotation]	CS	2.5144	5.65027	5.18	4.43659	0.172657	1.08384	0.242422	0.362423
AGAP007596		septin 7 [Source:VB Community Annotation]	CS	4.02149	5.43163	4.3211	3.80908	0.244993	1.88259	1.55916	3.38348
AGAP011369		gelsolin [Source:VB Community Annotation]	CS	3.46166	4.51845	4.08518	3.7257	1.04417	0.898719	1.48013	2.74769
AGAP006516		Multiplexin	CS	3.2895	4.38824	2.39751	3.71878	0.506374	2.37527	3.3565	3.97614
AGAP011532		septin [Source:VB Community Annotation]	CS	3.17488	5.33235	2.93095	3.53552	0	0.946566	0.886049	1.15283
AGAP010258		kinesin light chain [Source:VB Community Annotation]	CS	4.16577	3.85185	1.91716	3.19824	0.36174	1.37878	1.74101	2.19671
AGAP001712		actin related protein 2/3 complex%2C subunit 3 [Source:VB Community Annotation]	CS	3.03478	5.26913	2.31966	3.17412	0	1.58434	0.37303	0
AGAP011690	DCTN2-p50	Dynactin subunit 2 [Source:UniProtKB/Swiss-Prot%3BAcc:Q7PZ25]	CS	1.36328	4.00956	1.95461	3.04481	0	1.10863	0.866577	1.14858
AGAP012625		Annexin (Fragment) [Source:UniProtKB/TrEMBL%3BAcc:Q7QM48]	CS	2.2954	4.4903	3.27148	3.02663	0	0.760382	0.267761	0
AGAP003360		dynein light chain roadblock-type [Source:VB Community Annotation]	CS	2.7627	3.93489	1.88155	2.98067	0.485483	1.28359	1.87691	1.77972
AGAP000985		ARP2 actin-related protein 2 homolog [Source:VB Community Annotation]	CS	2.51913	5.13264	2.8834	2.9696	0.611705	0.996818	0.60928	0.824852
AGAP003722	ANXB10C	annexin B10C [Source:VB Community Annotation]	CS	0.947765	3.38753	3.33575	2.94644	0.0634752	0.740651	0.267441	0
AGAP008895		actin related protein 2/3 complex%2C subunit 5 [Source:VB Community Annotation]	CS	3.43518	4.84582	2.48322	2.92837	0	0.983518	0.632946	1.20449
AGAP006141		Capping protein (actin filament) muscle Z-line%2C alpha 1 [Source:VB Community Annotation]	CS	1.97421	5.2341	2.71885	2.91307	0.517508	0.684943	0.794489	1.97939
AGAP006686		spectrin alpha [Source:VB Community Annotation]	CS	2.63173	2.72512	1.71472	2.87023	0.384044	0.969972	0.937759	1.68215
AGAP008687		actin-like protein 6B [Source:VB Community Annotation]	CS	1.86759	4.66562	1.82272	2.84683	0.293282	0.412232	0.160755	0.465468
AGAP001582		painless/TRPA Channel	CS	5.06914	4.57716	4.32099	2.83601	0.500225	2.58583	1.94437	5.19889
AGAP004758		Regulatory Particle Non-ATPase 13 Pleckstrin homology-like domain	CS	2.20184	4.44565	2.02309	2.77662	0.286096	1.12912	1.21085	1.93919
AGAP001229		dynein light chain Tctex-type 1 [Source:VB Community Annotation]	CS	3.33405	5.31037	2.0589	2.66217	0.096717	1.09711	1.66119	3.99181
AGAP005075		Mapmodulin	CS	3.72421	4.83062	3.14114	2.62245	1.15124	1.62835	2.39448	3.17771
AGAP001218		tubulin alpha-4A chain [Source:VB Community Annotation]	CS	1.67517	3.14701	2.13036	2.52619	0.49946	1.01059	0.424072	0.178431
AGAP012784		annexin A4 [Source:VB Community Annotation]	CS	0.710161	3.08974	2.40658	2.48992	0.182077	1.00226	0.209071	0
AGAP000320		dynein intermediate chain%2C cytosolic [Source:VB Community Annotation]	CS	2.82895	3.99355	2.7725	2.48863	0.163553	0.778447	1.39572	1.50459
AGAP001219	TUB4A	tubulin alpha-4A chain [Source:VB Community Annotation]	CS	1.12271	2.65307	1.93242	2.40251	0.379959	0.893017	0.068858	0
AGAP001015	Notch	notch gene homolog 1 [Source:VB Community Annotation]	CS	2.61009	1.09878	0.994934	2.37707	0.583662	1.07325	1.50944	1.73631
AGAP001488		innexin 2 [Source:VB Community Annotation]	CS	3.10731	3.31923	2.87483	2.30779	0.332187	1.06394	0.810026	1.24961
AGAP010233		integrin beta 1 [Source:VB Community Annotation]	CS	3.96286	3.75643	1.38476	2.28722	0	0.923034	2.61736	5.5451
AGAP002945		bifunctional glutamyl/prolyl-tRNA synthetase [Source:VB Community Annotation]	CS	1.51533	3.17947	1.2508	2.21777	0	0.750821	0.92787	0.744346
AGAP005293		beta-tubulin isotype I [Source:VB Community Annotation]	CS	3.80976	4.5176	0.6193	2.20206	0.434356	0.475308	1.29731	0.675019
AGAP001315		Microtubule-associated protein 7 family	CS	2.78895	2.69402	1.79105	2.12519	0.649289	0.490118	2.85429	4.32946
AGAP002742		dynactin 3 [Source:VB Community Annotation]	CS	1.10499	2.4694	0.721953	2.02673	0	1.76873	0.144387	0.741968
AGAP004946		NCK-associated protein 1 [Source:VB Community Annotation]	CS	1.70325	2.6793	0.684899	2.01847	0.375602	0.47159	0.879972	0.559151
AGAP000561		kinesin family member 5 [Source:VB Community Annotation]	CS	1.45009	3.10629	2.30943	2.01521	0.176368	0.946842	1.42092	1.42596
AGAP009554		Nuclear envelope localisation domain	CS	4.03633	3.03191	0.881045	1.98339	1.45174	2.74134	2.84927	5.24507
AGAP012624		Annexin (Fragment) [Source:UniProtKB/TrEMBL%3BAcc:Q7QM49]	CS	0.799947	2.44141	2.62139	1.94663	0.192501	0.422506	0.137039	0
AGAP004510		Innexin inx2 [Source:VB Community Annotation]	CS	4.59337	3.69452	2.27697	1.94204	0.360899	0.627053	1.61081	4.88966
AGAP000120		tubulin folding cofactor B [Source:VB Community Annotation]	CS	0	2.7309	0.934431	1.91943	0.265845	0.311604	0.809917	0
AGAP003424		catenin alpha [Source:VB Community Annotation]	CS	1.47124	3.0511	1.75039	1.89165	0.18651	0.736712	0.795722	2.39781
AGAP010160		myosin I [Source:VB Community Annotation]	CS	3.30418	3.73279	1.59009	1.85267	0.507161	0.880853	1.91549	2.46557
AGAP002127		alpha-centractin [Source:VB Community Annotation]	CS	2.29735	3.80671	1.66226	1.85205	0.125839	0.132934	0.321595	2.67219
AGAP010895		Spectrin beta chain [Source:UniProtKB/TrEMBL%3BAcc:Q7PSH4]	CS	2.39288	2.78892	1.74801	1.81895	0.440406	0.809558	1.25979	1.37173
AGAP013747		dynactin 5 (p25) [Source:VB Community Annotation]	CS	1.38069	3.51318	1.06521	1.81076	0.298447	1.2975	0.189342	2.53821
AGAP000908		dynactin 4 [Source:VB Community Annotation]	CS	1.64756	3.46064	1.96466	1.7959	0.195378	0.656856	0.414108	0.443746
AGAP007523		myosin heavy chain [Source:VB Community Annotation]	CS	2.56267	3.17463	1.48167	1.74127	0.597389	0.985475	1.05429	2.46879
AGAP010770		Tubulin-specific chaperone E	CS	1.75655	3.77921	0.759604	1.68402	0.0985057	0	0.978557	0.856258
AGAP002062		Protein FAM50 homolog [Source:UniProtKB/Swiss-Prot%3BAcc:Q7PYQ5]	CS	0.593705	1.97576	1.67604	1.66025	0	0.760363	0.151314	0.61602
AGAP002688		Calponin homology domain	CS	2.29311	2.11184	1.80401	1.6066	0.306158	0.559543	2.01027	2.88899
AGAP003745		Unknown	CS	1.57006	2.4215	1.27418	1.57826	0	0.525457	0.622707	0.579279
AGAP007834		Tubulin gamma chain [Source:UniProtKB/TrEMBL%3BAcc:Q7Q3E4]	CS	1.02671	3.13906	0.493268	1.57413	0	0.34388	1.23364	0.698371
AGAP004000		myosin IX [Source:VB Community Annotation]	CS	3.26331	1.74518	1.92766	1.56479	0.0287489	1.53592	2.31126	4.26041
AGAP008532		paxillin [Source:VB Community Annotation]	CS	1.96405	3.49059	1.89349	1.54446	0.38379	0.46864	1.61372	2.18533
AGAP028138		Gelsolin	CS	2.78671	3.6888	0.346945	1.53479	0	0.951966	0.778505	3.62267
AGAP002015		dynein heavy chain 1%2C cytosolic [Source:VB Community Annotation]	CS	1.58204	1.74229	1.67999	1.50958	0.0693308	0.895288	1.70117	0.776079
AGAP012360		Unknown	CS	0.905541	1.07461	0.89224	1.48477	0.0518712	0.407312	0.807685	1.04657
AGAP011118		focal adhesion kinase 1 [Source:VB Community Annotation]	CS	2.54105	2.58512	2.69314	1.48371	0.20426	1.31625	1.219	2.63973
AGAP003352		Stomatin (EPB72)-like 3 [Source:VB Community Annotation]	CS	2.10111	2.82017	1.32998	1.38647	0	0.62597	2.51931	4.16782
AGAP011471		large subunit GTPase 1 [Source:VB Community Annotation]	CS	1.46308	2.6179	0.232907	1.38607	0.249553	0.546828	0.963455	1.18964
AGAP001668	CPR5	cuticular protein RR-2 family 5 [Source:VB Community Annotation]	CS	2.37418	1.30633	1.7062	1.3305	0.523198	0.827058	0.541267	0.936246
AGAP007569		gamma-tubulin complex localization	CS	1.02084	2.32589	0.963973	1.32782	0	0.452592	0.746962	1.45073
AGAP010324		Groucho [Source:VB Community Annotation]	CS	3.11323	1.78122	0.86935	1.30353	0.0998813	0.33176	2.10107	4.68426
AGAP008518		WAS protein family [Source:VB Community Annotation]	CS	1.1817	1.53016	1.56979	1.2987	0	0.804782	0.302891	0.346546
AGAP003790	ANXB9	annexin B9 [Source:VB Community Annotation]	CS	3.84811	1.61937	0.702904	1.23476	0	0.23631	2.02849	2.29152
AGAP006924		dynactin 6 [Source:VB Community Annotation]	CS	1.18647	1.71336	0.249503	1.22075	0.590216	0.336964	0	1.18028
AGAP000755		Unknown	CS	3.09443	1.09132	2.10136	1.21956	0.0794837	0.546235	1.64572	2.56845
AGAP002356		parvin%2C beta [Source:VB Community Annotation]	CS	1.07476	1.06655	1.11281	1.19559	0.330463	0.249667	0.421561	0.525522
AGAP009150		tubulin polyglutamylase TTLL4 [Source:VB Community Annotation]	CS	1.08407	0.704413	0.463622	1.18423	0.340819	0.271583	1.40235	2.50814
AGAP000720		neuronal cell adhesion molecule [Source:VB Community Annotation]	CS	1.90533	1.85258	1.07059	1.18111	0.136249	0.519035	1.34053	1.2109
AGAP004280		Groucho protein [Source:VB Community Annotation]	CS	2.22009	0.496141	1.61876	1.17772	0.0487101	1.6503	2.06389	4.44355
AGAP001450		ELMO domain-containing protein 2 [Source:VB Community Annotation]	CS	1.52037	0.748778	0.434995	1.13958	0.124719	0.141616	0.520079	2.45859
AGAP007474		Talin-1 [Source:VB Community Annotation]	CS	1.73989	1.5895	1.2948	1.13764	0.211386	0.187229	0.712485	1.95404
AGAP000323		Unknown	CS	0.802625	1.92745	0.55636	1.11871	0.231292	0.219101	0.236327	1.16388
AGAP005857		actin-related protein 6 [Source:VB Community Annotation]	CS	2.10599	2.67086	0.656528	1.10371	0.24565	0.625464	0.14445	0
AGAP001666	CPR3	cuticular protein RR-2 family 3 [Source:VB Community Annotation]	CS	1.74961	1.21166	1.55513	1.09799	0.372653	0.882842	0.472409	0.99061
AGAP003925		kinesin family member 1/13/14 [Source:VB Community Annotation]	CS	0.851356	0.244996	0.461411	1.01399	0	0.345036	0.771417	1.65356
AGAP007093		collagen type IV alpha-3-binding protein [Source:VB Community Annotation]	CS	4.06999	1.84389	0.656011	0.942395	0.452906	0.639201	1.8379	2.60775
AGAP006573		integrin-linked kinase [Source:VB Community Annotation]	CS	2.07761	2.36708	0.854761	0.935021	0.257132	0.672995	0.347214	1.22821
AGAP004335		filamin [Source:VB Community Annotation]	CS	2.37365	2.96709	0.598343	0.926772	0.275224	0.589055	1.79483	3.23922
AGAP007849		laminin%2C alpha 1/2 [Source:VB Community Annotation]	CS	1.89236	0.479507	0.914849	0.906144	0.495854	0.927252	2.10294	4.21649
AGAP005575		gamma-tubulin complex component 2 [Source:VB Community Annotation]	CS	1.25102	1.47589	0.207161	0.878593	0.555657	0.295042	0.443455	0.13213
AGAP010490		rabconnectin [Source:VB Community Annotation]	CS	2.03836	2.50852	0.515266	0.82565	0.614661	0.459842	1.72748	3.59494
AGAP005971		Phospholipase B-like	CS	1.97805	1.57563	0.857125	0.765181	0.53607	0.697846	1.2862	2.13357
AGAP011702		Unknown	CS	2.17281	0.977786	0.641474	0.762949	0.392954	0.129401	1.80519	2.65966
AGAP004440		spectrin beta [Source:VB Community Annotation]	CS	2.2648	0.823741	0.987588	0.75908	0.124451	0.659081	2.69636	3.94462
AGAP004490		G-patch domain	CS	0.764018	0.814326	0.049966	0.743442	0	0.236183	0.985872	0.300667
AGAP000776		myosin VI [Source:VB Community Annotation]	CS	0.883827	1.39115	0.151477	0.724773	0.351732	0.568328	1.2043	1.89741
AGAP006168		BMP binding endothelial regulator [Source:VB Community Annotation]	CS	2.45017	1.47874	1.57268	0.712849	0.212688	0.0968069	1.1172	1.51566
AGAP003064		cysteine and histidine-rich domain-containing protein [Source:VB Community Annotation]	CS	0.825612	2.45787	1.05675	0.702517	0.43995	0.640399	0.389756	0.164415
AGAP001665	CPR2	cuticular protein RR-2 family 2 [Source:VB Community Annotation]	CS	0.984288	0.552346	1.18118	0.702318	0.214614	0.377146	0	0.647665
AGAP001497	ACTN	Alpha-actinin%2C sarcomeric [Source:UniProtKB/Swiss-Prot%3BAcc:Q7PKQ5]	CS	2.53817	0.756516	0.609682	0.687855	0.154743	0.370877	1.10455	3.3508
AGAP001918		microfibrillar-associated protein 1 [Source:VB Community Annotation]	CS	1.11198	1.83421	0.347786	0.67317	0.243942	0.0791658	0.468506	0.944157
AGAP004194		dynactin 1 [Source:VB Community Annotation]	CS	0.999548	0.976596	0.615762	0.668174	0.318693	0.072768	0.425007	0.746665
AGAP003540		Unknown	CS	1.40206	0.75499	0	0.627049	0.205973	0.0349222	0.302422	2.06145
AGAP007532		vinculin [Source:VB Community Annotation]	CS	0.98071	1.45898	1.86311	0.626698	0	0.500982	1.04594	1.18219
AGAP009914		nuclear distribution protein NudE [Source:VB Community Annotation]	CS	0	0.562179	0.180411	0.616227	0.129318	0.14437	0.624722	0
AGAP006826		Integrin alpha-ps [Source:VB Community Annotation]	CS	0.564282	0.530866	0.0862055	0.613416	0	0	0.314352	0.779062
AGAP011644		inositol-1%2C4%2C5-trisphosphate 5-phosphatase [Source:VB Community Annotation]	CS	2.19019	0.919512	0.568217	0.610087	0.0675818	0.328297	1.21007	1.74554
AGAP008951		Pin2-interacting protein X1 [Source:VB Community Annotation]	CS	1.52651	0.860437	0.419015	0.600358	0.0458503	0.259861	0.568296	1.09891
AGAP003061		cysteine and histidine-rich domain-containing protein [Source:VB Community Annotation]	CS	0.207472	1.93444	0.704818	0.577801	0.392232	0.253235	0	0
AGAP011136		Unknown	CS	1.12837	0.912528	0.32844	0.572379	0.248802	0.354742	0.154153	0
AGAP001660		ciliary dynein heavy chain [Source:VB Community Annotation]	CS	1.81205	0.358563	0.312416	0.568833	0.5412	0.42903	3.03112	4.23993
AGAP007592		kinesin family member [Source:VB Community Annotation]	CS	1.51859	1.11117	0.627885	0.553926	0.4182	0.786234	1.62641	3.87797
AGAP012077		actin-related protein 10 [Source:VB Community Annotation]	CS	0.192964	1.02342	0.286651	0.532485	0	0.137651	0.499083	0.538555
AGAP007181		supervillin [Source:VB Community Annotation]	CS	1.13049	1.40669	0.366971	0.522695	0.298733	0.49207	0.694909	2.06343
AGAP009144		Unknown	CS	0.235642	0	0.476623	0.509953	0.085542	0.0681714	0.151192	0.37502
AGAP007384		TM LRR tendon-specific protein	CS	2.13163	0.55806	0.306088	0.509693	0.341336	0	1.34429	2.40671
AGAP002695		Unknown	CS	0.694007	0.847027	0.129702	0.508184	0.351862	0.636937	0.0557347	0.206798
AGAP009913		actin-binding protein IPP [Source:VB Community Annotation]	CS	1.24891	1.62036	0.237265	0.493918	0	0	0.37607	0.45365
AGAP010519		kinesin-like protein unc-104 [Source:VB Community Annotation]	CS	3.82833	0.408343	0.0933974	0.486352	0.771017	0.343819	2.92776	5.76527
AGAP003716	twf	Twinfilin [Source:UniProtKB/Swiss-Prot%3BAcc:Q7QG28]	CS	0	0.763566	0.403123	0.46694	0	0	0.0850843	0
AGAP006746		myosin-light-chain kinase [Source:VB Community Annotation]	CS	0	0.880073	0.295073	0.45046	0.192406	0.260848	0.675483	1.74085
AGAP001227		gamma-tubulin complex component 5 [Source:VB Community Annotation]	CS	1.8298	0.602972	0.553923	0.449517	0	0.116748	1.23858	2.63681
AGAP001783		microtubule-severing ATPase [Source:VB Community Annotation]	CS	0.414318	0.5238	0.566341	0.447594	0.105047	0	0.272934	1.00299
AGAP000988	CPAP3-A1c	cuticular protein [Source:VB Community Annotation]	CS	0.89978	0.210846	0.201785	0.434064	0.176916	0.23803	0.803673	2.20297
AGAP006183		slit protein [Source:VB Community Annotation]	CS	1.15123	0.373346	0.439906	0.432467	0	0	0.955926	4.34784
AGAP000352	TWDL1	cuticular protein TWDL family (TWDL1) [Source:VB Community Annotation]	CS	0.961277	1.0333	0.192793	0.414181	0	0.316464	0.0926887	0.158731
AGAP000723		cytoplasmic dynein 1 light intermediate chain 2 [Source:VB Community Annotation]	CS	0.671419	1.19709	0.230547	0.404136	0.0526587	0.468556	1.58976	1.0421
AGAP006884		Unknown	CS	0.341866	0.812771	0.226913	0.400755	0.414446	0.296027	0.347308	0.972967
AGAP006241		Innexin inx2 [Source:VB Community Annotation]	CS	0	0	0	0.39092	0	0.481435	1.32277	1.22822
AGAP002434		centrosomin [Source:VB Community Annotation]	CS	1.35608	0.647334	0	0.384905	0	0.184891	0.959978	2.39082
AGAP011141		tubulin-specific chaperone cofactor E-like protein [Source:VB Community Annotation]	CS	0.231377	0.115951	0.354781	0.372612	0.19267	0.117182	0.568804	2.11427
AGAP001935		Unknown	CS	1.87788	0.260711	0	0.369721	0.116194	0.139203	1.85862	3.09953
AGAP004136		Unknown	CS	2.08209	0.129124	0	0.360933	0.223007	0.284631	1.87727	2.43874
AGAP008035		kinesin-like protein, Klp38B	CS	0.958284	0.862423	0.39326	0.357461	0	0.148816	1.0796	1.52733
AGAP001794		Unknown	CS	0.486012	1.13353	0.683813	0.354648	0.0460928	0.177318	0.18395	0.39243
AGAP002154		myosin-light-chain kinase [Source:VB Community Annotation]	CS	0	0	0	0.338056	0.12351	0.216765	0.589169	0.924479
AGAP001287		Unknown	CS	1.53983	0.632875	0.629387	0.337945	0.114582	0.134164	1.45978	2.20038
AGAP010671		actin-related protein 8 [Source:VB Community Annotation]	CS	0.840081	0.0636078	0	0.335031	0	0	0.496961	0.486172
AGAP011162		cytoskeleton-associated protein 5 [Source:VB Community Annotation]	CS	0.534456	0.427861	0.429722	0.330723	0.341414	0.0222736	0.604057	0.680481
AGAP002248		kinesin family member C1 [Source:VB Community Annotation]	CS	0.757485	0.440502	0	0.325293	0	0.0444816	0.37911	0.550922
AGAP011292		Protein flightless-1 [Source:VB Community Annotation]	CS	0.871158	1.03833	0.286289	0.317441	0	0.232808	0.72968	1.17442
AGAP028178	CPLCP13	cuticular protein (putative) CPLCP13 [Source:VB Community Annotation]	CS	1.64911	0	0	0.310471	0	0	1.09285	1.6471
AGAP000032		Unknown	CS	1.7929	1.19873	0.397798	0.300069	0.065817	0.276894	0.570459	2.67243
AGAP011138		myosin XVIII [Source:VB Community Annotation]	CS	0.192948	0.513627	0.203971	0.29984	0	0.0834876	0.378087	0.534501
AGAP003579		cadherin-87A [Source:VB Community Annotation]	CS	2.03938	0.074177	0.544038	0.296092	0.0946272	0.102156	2.38335	3.84981
AGAP005425		actin-binding LIM protein [Source:VB Community Annotation]	CS	3.09938	1.03323	0.448549	0.293312	0.191119	0.394689	1.91939	4.28968
AGAP000768		septin 4 [Source:VB Community Annotation]	CS	0.137183	0.478978	0	0.291012	0	0	1.71148	0.94092
AGAP011030		microtubule-associated serine/threonine kinase [Source:VB Community Annotation]	CS	0.0999292	0.251914	0.466076	0.288376	0.104893	0	0.04201	0.228815
AGAP003296		LETM1 and EF-hand domain-containing protein 1%2C mitochondrial precursor [Source:VB Community Annotation]	CS	1.61827	2.55016	1.22499	0.284546	0.0963771	0.139198	0.988322	1.98707
AGAP001705		Unknown	CS	0.60079	0.257707	0.464765	0.283609	0.326771	0.364859	0.942562	1.7911
AGAP004782		tubulin-specific chaperone D [Source:VB Community Annotation]	CS	2.08277	0.714095	0	0.275009	0.138051	0.0973359	1.92766	2.89166
AGAP004690	CPF3	cuticular protein 3 from fifty-one aa family [Source:VB Community Annotation]	CS	1.86219	0	0.26619	0.274231	0	0	0.846167	1.2721
AGAP011697		Unknown	CS	0.859166	0.786384	0.351346	0.274055	0.254335	0.396811	0.940906	1.56645
AGAP000187		Unknown	CS	0.767907	1.34036	0.489937	0.271979	0	0	0.228428	1.71726
AGAP001192		Unknown	CS	0	0	0	0.260165	0.269651	0.0842349	0.61014	2.08213
AGAP010435		dynein heavy chain 9%2C axonemal [Source:VB Community Annotation]	CS	2.81588	0.164485	0.0580425	0.244261	0.145656	0.342058	3.06928	3.94509
AGAP010336		tubulin polyglutamylase TTLL1 [Source:VB Community Annotation]	CS	2.52572	0.983347	0.863646	0.239536	0.11759	0.199157	0.557799	3.3577
AGAP011620		collagen%2C type I/II/III/V/XI/XXIV/XXVII alpha [Source:VB Community Annotation]	CS	0.653291	0.23539	0	0.227102	0.167498	0.247825	1.2424	2.24593
AGAP000228		netrin 1 [Source:VB Community Annotation]	CS	0.400888	0	0	0.226462	0	0.0687896	1.19861	2.26087
AGAP011099		myosin III [Source:VB Community Annotation]	CS	0.846872	0	0	0.225863	0	0.0437983	1.27153	2.12339
AGAP007042	CPR62	cuticular protein RR-1 family 62 [Source:VB Community Annotation]	CS	0.779454	0.222121	0.119792	0.220877	0.267236	0	0.389584	0.885659
AGAP000266		Unknown	CS	0.425166	1.05455	0	0.214662	0.36777	0	0.379374	0.444875
AGAP003703		abnormal spindle-like microcephaly-associated protein [Source:VB Community Annotation]	CS	0	0.399266	0	0.213369	0	0	0.307406	1.80992
AGAP000307		Integrin alpha-PS1 [Source:VB Community Annotation]	CS	0.282354	0.619265	0.151583	0.211767	0.20745	0	0.704464	1.15923
AGAP001570		microtubule-associated protein tau [Source:VB Community Annotation]	CS	0.904583	0.0622822	0.132029	0.201888	0.357433	0.0744216	1.91411	3.31728
AGAP007706		kinesin family member 20/23 [Source:VB Community Annotation]	CS	0	1.24971	0	0.201781	0	0.0565719	0.288846	0.818939
AGAP010098	CPR83	cuticular protein RR-2 family 83 [Source:VB Community Annotation]	CS	2.07592	0	0	0.193422	0.200234	0	2.74803	4.43453
AGAP004416		dynein light chain 1%2C axonemal [Source:VB Community Annotation]	CS	0.257097	0.12941	0.242829	0.191212	0	0.104398	1.01707	0.548702
AGAP006887		dynein light chain 4%2C axonemal [Source:VB Community Annotation]	CS	2.362	0	0	0.188898	0.346646	0	1.24718	2.12691
AGAP006499		Unknown	CS	0.455555	0	0	0.188695	0	0	1.31076	2.00322
AGAP006479		myosin V [Source:VB Community Annotation]	CS	0.752184	0	0.253119	0.18843	0	0.310757	0.94227	1.27225
AGAP005828		Alpha-tubulin N-acetyltransferase [Source:UniProtKB/Swiss-Prot%3BAcc:Q7PNM6]	CS	1.7517	0.17711	0.118703	0.175672	0.246564	0.326215	1.48745	3.42285
AGAP001622		myosin light chain 5 [Source:VB Community Annotation]	CS	0.653557	0.70114	0.457106	0.167349	0.504389	0.528277	0.395518	1.20148
AGAP000989	CPAP3-A1a	cuticular protein [Source:VB Community Annotation]	CS	1.24951	0.46265	0.178858	0.16556	0	0.0731386	0.828952	1.65789
AGAP006989		Subito [Source:VB Community Annotation]	CS	0.244603	0.898006	0.0418218	0.162275	0	0.142604	0.145388	0.780731
AGAP010396		kinesin family member 3/17 [Source:VB Community Annotation]	CS	1.29194	0.69192	0.364501	0.159797	0.123312	0.39873	1.1824	2.30297
AGAP013421	TWDL3	cuticular protein TWDL family (TWDL3) [Source:VB Community Annotation]	CS	0	0	0.186556	0.155334	0	0	0.893667	0.748757
AGAP001669	CPR6	cuticular protein RR-2 family 6 [Source:VB Community Annotation]	CS	0.418502	0.436384	0.728631	0.152183	0.260598	0.0669177	0.744296	0.525058
AGAP008817	CPLCP3	cuticular protein (putative) CPLCP3 [Source:VB Community Annotation]	CS	1.14813	0	0	0.15075	0	0	0.733444	1.73039
AGAP001591		cadherin-87A [Source:VB Community Annotation]	CS	1.32866	0	0	0.148441	0.0677114	0	2.05507	2.98413
AGAP007563		Unknown	CS	3.043	0.101449	0.0269055	0.14705	0.435473	0.329702	3.89968	5.28655
AGAP004403		myosin I [Source:VB Community Annotation]	CS	0.991027	0.349039	0.728487	0.144984	0.105097	0.0268674	1.44282	3.45387
AGAP012471		Kinesin-like protein [Source:UniProtKB/TrEMBL%3BAcc:Q7QL44]	CS	1.12195	0	0	0.140642	0	0	0.968908	1.73889
AGAP001569		myosin alkali light chain 1 [Source:VB Community Annotation]	CS	0.63125	0	0	0.138956	0.118588	0.290901	1.59085	4.99366
AGAP008469		cuticular protein CPLCG family (CPLCG21) [Source:VB Community Annotation]	CS	0.347837	0.290639	0.0289296	0.13775	0.0849775	0	0.311621	1.18703
AGAP005213		myosin XV [Source:VB Community Annotation]	CS	0.950077	0.271064	0	0.135223	0.0445682	0.0461581	1.53112	1.00669
AGAP010887	CPR113	cuticular protein RR-2 family 113 [Source:VB Community Annotation]	CS	0.211754	0.392634	0	0.131609	0	0	0.798205	2.35662
AGAP007980	CPCFC1	cuticular protein CPCFC family (CPCFC1) [Source:VB Community Annotation]	CS	0.494858	0	0	0.130719	0	0	0.77543	1.02593
AGAP010715		Anillin/rhotekin [Source:VB Community Annotation]	CS	1.01531	0.87737	0.241562	0.128716	0	0	0.819466	1.05642
AGAP005165		Unknown	CS	1.99328	0	0	0.126506	0.14057	0.116125	3.48755	3.78838
AGAP009960		tubulin monoglycylase TTLL3/8 [Source:VB Community Annotation]	CS	0.500687	0	0	0.126134	0	0	0.790586	1.33363
AGAP001799		tropomyosin 1 [Source:VB Community Annotation]	CS	2.4618	0.213033	0.190578	0.124596	0	0.346471	2.61279	3.93861
AGAP009940		Unknown	CS	2.84348	0	0.274253	0.119114	0	0	1.19212	1.95813
AGAP003271		dynein%2C axonemal%2C heavy chain 5 [Source:VB Community Annotation]	CS	1.07882	0.0650888	0	0.110551	0.110598	0	1.34297	2.29406
AGAP001194		Unknown	CS	2.63678	0.154972	0	0.109567	0.0767174	0.29213	1.65039	3.59069
AGAP002427		kinesin family member 3/17 [Source:VB Community Annotation]	CS	1.20307	1.0085	0.463752	0.109003	0	0	0.371585	0.613108
AGAP004303		Integrin alpha-ps [Source:VB Community Annotation]	CS	1.01464	0	0	0.106227	0	0.199767	1.48674	1.55125
AGAP009933		dachs [Source:VB Community Annotation]	CS	2.03744	0.0714404	0.0239241	0.10601	0.143619	0	1.3088	3.27541
AGAP009717		cadherin [Source:VB Community Annotation]	CS	1.33628	0.120096	0.0349524	0.10581	0.418226	0.126009	1.92315	2.49828
AGAP009790	CPAP3-B	cuticular protein [Source:VB Community Annotation]	CS	0.943394	0	0	0.105053	0	0.162735	1.12162	2.8709
AGAP007815		kinesin family member 4/7/21/27 [Source:VB Community Annotation]	CS	1.34872	0.146621	0.0198285	0.0968873	0	0.0733744	1.80118	2.29017
AGAP004576	TWDL12	cuticular protein TWDL family (TWDL12) [Source:VB Community Annotation]	CS	1.91727	0	0	0.0963571	0.229965	0	0.86449	2.86759
AGAP010470		Unknown	CS	0	0	0.217449	0.0935786	0	0	1.95411	2.03426
AGAP001633		Fibronectin type 3 domain; Immunoglobulin (Ig)-like domain	CS	1.60047	0.0183612	0	0.0911218	0.235937	0.0181293	2.01415	3.11575
AGAP008275		Tektin-2 [Source:VB Community Annotation]	CS	1.20845	0	0.475525	0.0901709	0	0	0.56747	2.30119
AGAP007675		dynein%2C axonemal heavy chain [Source:VB Community Annotation]	CS	0.619741	0.0448524	0	0.0871584	0.180331	0.0238815	2.06353	2.74149
AGAP000159		Kinesin-like protein [Source:UniProtKB/TrEMBL%3BAcc:Q7PRX2]	CS	1.0738	0.359818	0.336293	0.0786841	0.164634	0.190763	2.07137	2.64989
AGAP010031		testis specific tektin [Source:VB Community Annotation]	CS	1.27819	0.229937	0	0.0714499	0	0.470008	1.03716	2.40346
AGAP006497	CPR134	cuticular protein RR-2 family 134 [Source:VB Community Annotation]	CS	0	0	0	0.0700166	0	0.0758887	1.00727	1.63326
AGAP003226		dynein heavy chain 2 [Source:VB Community Annotation]	CS	0.565984	0	0.216699	0.0691122	0.0636922	0.143637	1.57693	2.13619
AGAP009711		cadherin [Source:VB Community Annotation]	CS	1.35757	0.182114	0.103231	0.0679968	0.319574	0.249805	1.66014	0.818773
AGAP010147		myosin heavy chain [Source:VB Community Annotation]	CS	3.15506	0.437558	0.0640647	0.0676883	0.414642	0.597564	3.19605	5.34404
AGAP009715		cadherin [Source:VB Community Annotation]	CS	0	0.163372	0.0581336	0.0657341	0.29545	0.132591	0.950285	0.655144
AGAP001672		Kl-5 beta dynein heavy chain [Source:VB Community Annotation]	CS	0.427904	0	0	0.0641079	0.291235	0	1.01655	1.53785
AGAP002334	spas	Spastin [Source:UniProtKB/Swiss-Prot%3BAcc:Q7QBW0]	CS	1.93678	0.494603	0.565555	0.0637221	0	0.277339	1.18117	2.34091
AGAP011619		Unknown	CS	1.7117	0.0983847	0	0.0633598	0	0.169158	2.5143	2.96272
AGAP007502		kinesin family member 11 [Source:VB Community Annotation]	CS	1.01565	0.639751	0	0.0631492	0.217442	0.183692	1.79792	1.86036
AGAP008622		Tubulin beta chain [Source:UniProtKB/TrEMBL%3BAcc:A0A1S4GYS5]	CS	0.241846	0.438711	0	0.0619538	0	0.352023	0.384053	0.507995
AGAP008400		Unknown	CS	1.89629	0.151912	0	0.0617492	0.211471	0	1.59348	3.17199
AGAP009723		cadherin [Source:VB Community Annotation]	CS	3.06918	0.180852	0.0201537	0.0601606	0.286029	0.251934	1.87595	3.59093
AGAP001597		Unknown	CS	0.888848	0	0	0.0582727	0	0.139963	0.513618	1.23521
AGAP002589		dynein light intermediate chain 1%2C cytosolic [Source:VB Community Annotation]	CS	1.50094	0.109591	0	0.0581385	0	0	0.350439	2.34957
AGAP010286		Unknown	CS	2.60447	0.0341122	0	0.0579234	0.134565	0.219653	3.56967	5.41036
AGAP010956		gamma-tubulin complex component 6 [Source:VB Community Annotation]	CS	0.819211	0.111075	0	0.0555961	0	0.0364596	0.533627	1.1148
AGAP009730		myosin III [Source:VB Community Annotation]	CS	0.893286	0.120114	0	0.0540349	0	0	0.479135	1.27188
AGAP009716		cadherin [Source:VB Community Annotation]	CS	0.828562	0.130018	0.164646	0.0539852	0.27377	0.208126	1.6051	1.81014
AGAP013465	CPLCP1	cuticular protein (putative) CPLCP1 [Source:VB Community Annotation]	CS	1.68919	0	0	0.0537916	0	0	1.32215	0.510168
AGAP010790		dynein heavy chain 2%2C cytosolic [Source:VB Community Annotation]	CS	0.584133	0.176778	0.197462	0.0530235	0.161966	0.0263772	1.79725	2.4111
AGAP004288		tubulin polyglutamylase TTLL5 [Source:VB Community Annotation]	CS	1.28155	0.0917485	0.243698	0.0526707	0	0.0889053	1.54775	2.65851
AGAP028200	CPLCP9	cuticular protein (putative) CPLCP9 [Source:VB Community Annotation]	CS	1.32263	0	0	0.0484686	0.197643	0.21804	1.27877	3.48824
AGAP013175	TWDL4	cuticular protein TWDL family (TWDL4) [Source:VB Community Annotation]	CS	0.360177	0	0.237086	0.0467972	0	0	0.775858	1.76222
AGAP010122	CPR132	cuticular protein RR-2 family 132 [Source:VB Community Annotation]	CS	1.55303	0.0734529	0.103302	0.0461409	0.0872781	0.170057	1.58422	2.03291
AGAP001112		Unknown	CS	1.30549	0	0	0.0406334	0.0780301	0	1.40635	3.13416
AGAP005095		actin beta/gamma 1 [Source:VB Community Annotation]	CS	0.696049	0.142616	0.0409405	0.0402863	0.662734	0.574092	0.817742	1.39168
AGAP002909		Control protein HCTL029 [Source:VB Community Annotation]	CS	1.47965	0	0	0.0381931	0	0	1.17116	2.99005
AGAP011516		actin%2C cytoplasmic [Source:VB Community Annotation]	CS	1.44827	0.26208	0.105297	0.035483	0.117984	0	1.10581	1.91178
AGAP011936		Unknown	CS	1.16685	0	0	0.034957	0	0	1.27545	1.49592
AGAP006868	CPR140	cuticular protein RR-1 family 140 [Source:VB Community Annotation]	CS	0.809568	0	0	0.0332712	0.131975	0	0.746726	0.615855
AGAP001632		Unknown	CS	0.832398	0.0461742	0.0281145	0.0307987	0.240067	0	0.41549	2.07427
AGAP011529		Unknown	CS	0	0.284869	0.115789	0.0279708	0	0	0.991581	1.11656
AGAP010867		Unknown	CS	1.43558	0.296224	0	0.0265253	0.263709	0.0270607	1.02491	1.37146
AGAP002310		protocadherin-15 [Source:VB Community Annotation]	CS	1.09868	0	0.127047	0.0261531	0.301799	0	1.67945	2.9377
AGAP003751	CPAP1-C	Unknown	CS	0	0	0	0.0246442	0.0445639	0	0.946676	0.51447
AGAP011441		dynein heavy chain [Source:VB Community Annotation]	CS	0.48279	0	0	0.0158896	0.336403	0.139387	0.590983	1.30031
AGAP009568		dynein heavy chain [Source:VB Community Annotation]	CS	0.479895	0.0372149	0	0.0152544	0	0.238142	1.04796	1.87676
AGAP003803		anastral spindle 1 [Source:VB Community Annotation]	CS	1.10112	0	0.313583	0	0.291292	0	0.301144	0.695652
AGAP010102		cuticular protein RR-2 family 148 [Source:VB Community Annotation]	CS	0.935651	0	0.295629	0	0	0	1.39015	2.11227
AGAP006795	Aper1	peritrophin 1 [Source:VB Community Annotation]	CS	1.00036	0.422058	0.27724	0	0	0.229265	1.1312	5.15248
AGAP012462	CPR147	cuticular protein RR-2 family 147 [Source:VB Community Annotation]	CS	0	0	0.230663	0	0.246551	0	1.74703	2.24518
AGAP028008	CPLCP19	cuticular protein (putative) CPLCP19 [Source:VB Community Annotation]	CS	0.588237	0.189453	0.229555	0	0	0	0.865797	2.12774
AGAP028208	CPLCP22	cuticular protein (putative) CPLCP22 [Source:VB Community Annotation]	CS	0.982398	0	0.229555	0	0	0	1.66227	1.58872
AGAP000153		Unknown	CS	0.753096	0	0.198854	0	0	0	0.647713	0.776923
AGAP028016	CPLCP15	cuticular protein (putative) CPLCP15 [Source:VB Community Annotation]	CS	0.649891	0	0.194436	0	0	0	1.25089	0.982712
AGAP001676		actin%2C cytoplasmic [Source:VB Community Annotation]	CS	1.05789	0.227587	0.135392	0	0.0962708	0	1.31478	3.69879
AGAP004877		paramyosin [Source:VB Community Annotation]	CS	1.6454	0.0326916	0.125485	0	0.168901	0.231445	1.81416	3.0999
AGAP009870	CPR151	cuticular protein RR-2 family 151 [Source:VB Community Annotation]	CS	0	0	0.0981738	0	0	0	0.759192	2.47235
AGAP006867	CPR141	cuticular protein RR-1 family 141 [Source:VB Community Annotation]	CS	1.14373	0.209646	0.0647562	0	0.214376	0.116425	0.590479	1.80869
AGAP006256		Cad74A [Source:VB Community Annotation]	CS	0.964674	0.12117	0	0	0.0842269	0.191237	1.32447	1.19763
AGAP009725		cadherin [Source:VB Community Annotation]	CS	2.16278	0	0	0	0.249474	0.367226	1.94576	4.9028
AGAP010363		Chitin binding Peritrophin-A domain	CS	1.05344	0.118597	0	0	0	0	1.0221	2.3791
AGAP003308	CPAP3-C	Control protein HCTL029 [Source:VB External Description;Acc:AGAP003308]	CS	1.5677	0	0	0	0	0.297359	1.30935	1.89553
AGAP027993	CPLCP10	cuticular protein (putative) CPLCP10 [Source:VB Community Annotation]	CS	0.743041	0.169015	0	0	0.238398	0	1.84852	1.45633
AGAP028156	CPLCP14	cuticular protein (putative) CPLCP14 [Source:VB Community Annotation]	CS	0.954256	0	0	0	0	0	0.69197	1.99302
AGAP028002	CPLCP7	cuticular protein (putative) CPLCP7 [Source:VB Community Annotation]	CS	1.20355	0	0	0	0	0	1.32058	1.65808
AGAP000987	CPAP3-A1b	cuticular protein [Source:VB Community Annotation]	CS	0.443987	0	0	0	0.4756	0	0.849737	2.13146
AGAP000986	CPAP3-D	cuticular protein [Source:VB Community Annotation]	CS	0.717734	0	0	0	0	0.312694	0.833858	0.841515
AGAP010905	CPFL4	cuticular protein 4 from CPFL family [Source:VB Community Annotation]	CS	0.707664	0	0	0	0	0	0.863284	2.21802
AGAP010908	CPFL7	cuticular protein 7 from CPFL family [Source:VB Community Annotation]	CS	1.28381	0	0	0	0.227322	0	1.43199	1.63412
AGAP008444	CPLCG1	cuticular protein CPLCG family (CPLCG1) [Source:VB Community Annotation]	CS	1.01295	0.179359	0	0	0.221948	0	1.199	1.93193
AGAP008479	CPLCG26	cuticular protein CPLCG family (CPLCG26) [Source:VB Community Annotation]	CS	0.280437	0.16077	0	0	0.186755	0.107367	0.48657	1.28578
AGAP008453	CPLCG9	cuticular protein CPLCG family (CPLCG9) [Source:VB Community Annotation]	CS	0.840166	0	0	0	0.185711	0.287417	0.934631	1.31952
AGAP009758	CPLCP11	cuticular protein CPLCP11 [Source:VB Community Annotation]	CS	0.999893	0	0	0	0	0.10507	1.53999	1.41015
AGAP008893	CPLCP8	cuticular protein CPLCP8 [Source:VB Community Annotation]	CS	1.00936	0	0	0	0	0.269505	1.10918	4.047
AGAP005696	CPTC1	cuticular protein from two-cysteine family 1 [Source:VB Community Annotation]	CS	0.384951	0	0	0	0.34169	0.109752	1.29226	2.90434
AGAP000344	CPR127	cuticular protein RR-1 family 127 [Source:VB Community Annotation]	CS	0.340317	0	0	0	0	0	1.12443	1.16155
AGAP006840	CPR136	cuticular protein RR-1 family 136 [Source:VB Community Annotation]	CS	2.5503	0.209951	0	0	0	0	0.488517	1.86057
AGAP005995	CPR138	cuticular protein RR-1 family 138 [Source:VB Community Annotation]	CS	0.306161	0.164049	0	0	0	0	0.755419	1.95677
AGAP005456	CPR15	cuticular protein RR-1 family 15 [Source:VB Community Annotation]	CS	1.02363	0.153787	0	0	0	0	0.945963	1.51643
AGAP005996	CPR21	cuticular protein RR-1 family 21 [Source:VB Community Annotation]	CS	0.631492	0	0	0	0	0.236051	1.26603	4.53951
AGAP006007	CPR28	cuticular protein RR-1 family 28 [Source:VB Community Annotation]	CS	0.56444	0	0	0	0	0	0.41138	3.14253
AGAP006009	CPR30	cuticular protein RR-1 family 30 [Source:VB Community Annotation]	CS	0	0	0	0	0	0	0.963281	2.45058
AGAP006864	CPR34	cuticular protein RR-1 family 34 [Source:VB Community Annotation]	CS	0	0	0	0	0	0	0.58737	2.1238
AGAP006854	CPR41	cuticular protein RR-1 family 41 [Source:VB Community Annotation]	CS	0.861497	0	0	0	0	0.273478	1.13045	0.807431
AGAP006846	CPR49	cuticular protein RR-1 family 49 [Source:VB Community Annotation]	CS	2.05344	0	0	0	0	0	0.481116	1.55131
AGAP006829	CPR59	cuticular protein RR-1 family 59 [Source:VB Community Annotation]	CS	1.59186	0.11349	0	0	0.119005	0	0.41333	3.38885
AGAP006828	CPR60	cuticular protein RR-1 family 60 [Source:VB Community Annotation]	CS	0	0	0	0	0.504582	0	1.49756	1.40907
AGAP006866	CPR63	cuticular protein RR-1 family 63 [Source:VB Community Annotation]	CS	0.260858	0	0	0	0	0	1.16766	1.37677
AGAP006865	CPR64	cuticular protein RR-1 family 64 [Source:VB Community Annotation]	CS	0.263197	0	0	0	0	0	0.74192	2.16291
AGAP006839	CPR67	cuticular protein RR-1 family 67 [Source:VB Community Annotation]	CS	0.891603	0	0	0	0.277881	0.19806	0.894475	2.12803
AGAP006838	CPR68	cuticular protein RR-1 family 68 [Source:VB Community Annotation]	CS	1.97185	0	0	0	0.179991	0.192532	1.4196	1.47181
AGAP009876	CPR78	cuticular protein RR-1 family 78 [Source:VB Community Annotation]	CS	0.541424	0	0	0	0	0.106363	1.03207	1.26831
AGAP008960	CPR110	cuticular protein RR-2 family 110 [Source:VB Community Annotation]	CS	0.809029	0	0	0	0.291707	0	0.681231	2.59603
AGAP010369	CPR112	cuticular protein RR-2 family 112 [Source:VB Community Annotation]	CS	1.83592	0	0	0	0.125428	0.463455	0.69169	2.70797
AGAP003379	CPR117	cuticular protein RR-2 family 117 [Source:VB Community Annotation]	CS	1.81937	0.135881	0	0	0	0	0.474861	1.64617
AGAP003385	CPR123	cuticular protein RR-2 family 123 [Source:VB Community Annotation]	CS	2.12708	0	0	0	0	0.284949	0.663373	0.547979
AGAP000820	CPR125	cuticular protein RR-2 family 125 [Source:VB Community Annotation]	CS	0.844362	0	0	0	0	0	0.870655	1.95137
AGAP000345	CPR126	cuticular protein RR-2 family 126 [Source:VB Community Annotation]	CS	1.10108	0	0	0	0	0	1.39134	1.62268
AGAP000085	CPR129	cuticular protein RR-2 family 129 [Source:VB Community Annotation]	CS	1.56297	0.312438	0	0	0.350622	0.403025	2.27558	3.34159
AGAP006261	CPR135	cuticular protein RR-2 family 135 [Source:VB Community Annotation]	CS	0	0	0	0	0	0	1.1909	1.86369
AGAP013248	CPR139	cuticular protein RR-2 family 139 [Source:VB Community Annotation]	CS	0.271248	0	0	0	0	0	1.00326	2.33971
AGAP010717	CPR143	cuticular protein RR-2 family 143 [Source:VB Community Annotation]	CS	0.971973	0	0	0	0	0	0.798923	1.3378
AGAP012466	CPR146	cuticular protein RR-2 family 146 [Source:VB Community Annotation]	CS	0.441885	0	0	0	0	0	0.928145	2.68075
AGAP006283	CPR70	cuticular protein RR-2 family 70 [Source:VB Community Annotation]	CS	1.89295	0.0935709	0	0	0.152196	0	0.545836	2.12482
AGAP006597	CPR72	cuticular protein RR-2 family 72 [Source:VB Community Annotation]	CS	1.79518	0	0	0	0.229738	0	1.72409	1.70543
AGAP010103	CPR86	cuticular protein RR-2 family 86 [Source:VB Community Annotation]	CS	0.93919	0	0	0	0.409355	0	0.572795	2.05992
AGAP010106	CPR89	cuticular protein RR-2 family 89 [Source:VB Community Annotation]	CS	0.5571	0	0	0	0.199012	0	0.879563	1.68377
AGAP010114	CPR94	cuticular protein RR-2 family 94 [Source:VB Community Annotation]	CS	0.551937	0	0	0	0.215878	0	0.68916	1.28074
AGAP010120	CPR97	cuticular protein RR-2 family 97 [Source:VB Community Annotation]	CS	0.296743	0.108586	0	0	0	0.105919	0.993739	1.8318
AGAP000537	TWDL8	cuticular protein TWDL family (TWDL8) [Source:VB Community Annotation]	CS	0	0	0	0	0	0	1.38453	1.85639
AGAP006149	CPLCX3	cuticular protein unclassified [Source:VB Community Annotation]	CS	0.369828	0	0	0	0	0	0.869189	1.15964
AGAP001329	CPLCX1	cuticular protein unclassified [Source:VB Community Annotation]	CS	2.32361	0	0	0	0.104668	0	0.807695	1.35416
AGAP011515		cytoplasmic actin [Source:VB Community Annotation]	CS	1.43956	0	0	0	0.440564	0.0729727	1.15425	2.10227
AGAP002009		dynein heavy chain%2C axonemal [Source:VB Community Annotation]	CS	1.09089	0.0497005	0	0	0.0413728	0.133459	2.23736	3.51102
AGAP008689		dynein intermediate chain 1%2C axonemal [Source:VB Community Annotation]	CS	1.09692	0.126742	0	0	0.148747	0	1.15077	3.35559
AGAP013030		dynein light chain roadblock-type 2 [Source:VB Community Annotation]	CS	2.29141	0	0	0	0	0	1.39015	2.18683
AGAP007006		filamin [Source:VB Community Annotation]	CS	0	0	0	0	0.0462064	0	1.04339	2.10424
AGAP001476		Innexin inx2 [Source:VB Community Annotation]	CS	1.10693	0.218276	0	0	0	0	0.824476	3.54747
AGAP001487	shakB	Innexin shaking-B [Source:UniProtKB/Swiss-Prot%3BAcc:Q7PXN1]	CS	2.66386	0.268015	0	0	0.169972	0	0.828568	3.31087
AGAP008357		kinesin family member 26 [Source:VB Community Annotation]	CS	1.77463	0.234368	0	0	0.29991	0.102887	1.4278	2.31431
AGAP011874		kinesin-like protein KIF12 [Source:VB Community Annotation]	CS	0	0	0	0	0	0	0.826985	0.782572
AGAP003323		Microtubule plus end-directed kinesin motor 3A [Source:VB Community Annotation]	CS	0.767322	0.15062	0	0	0.0894918	0.161395	0.715995	0.673607
AGAP000749		Muscular protein 20 [Source:VB Community Annotation]	CS	0.399591	0	0	0	0	0.192184	1.33168	2.94706
AGAP000748		Muscular protein 20 [Source:VB Community Annotation]	CS	0.788237	0	0	0	0	0	1.31782	2.06076
AGAP010632		myosin-light-chain kinase [Source:VB Community Annotation]	CS	1.39699	0	0	0	0.209474	0	1.09957	3.31158
AGAP000225		netrin 1 [Source:VB Community Annotation]	CS	0.997666	0.196155	0	0	0.0618715	0	1.57663	2.25001
AGAP003873		protein crumbs [Source:VB Community Annotation]	CS	1.17441	0	0	0	0.277037	0.107287	0.620317	0.861607
AGAP008943		protein turtle [Source:VB Community Annotation]	CS	1.67223	0	0	0	0	0.0822755	0.968975	1.88832
AGAP007905		protocadherin-16/23 [Source:VB Community Annotation]	CS	0.333497	0	0	0	0.319147	0.483996	0.8408	1.83101
AGAP002006		reticulon/nogo receptor [Source:VB Community Annotation]	CS	1.32801	0.0899857	0	0	0.172615	0	0.794709	2.47108
AGAP002007		reticulon/nogo receptor [Source:VB Community Annotation]	CS	1.07772	0	0	0	0	0.0782672	0.962036	1.75837
AGAP002350		troponin T%2C fast skeletal muscle [Source:VB Community Annotation]	CS	1.50639	0.0668279	0	0	0.316062	0.343473	2.02679	3.31079
AGAP003237		tubulin%2C alpha 1 [Source:VB Community Annotation]	CS	0	0.0794619	0	0	0	0	0.745307	1.65819
AGAP010825		Unknown	CS	1.37458	0.301433	0	0	0	0.193546	0.860943	2.01498
AGAP010466		Unknown	CS	2.81797	0.252231	0	0	0.241597	0	1.70476	3.66567
AGAP005468		Unknown	CS	0	0.200195	0	0	0	0.127545	0.59965	1.01861
AGAP002629		Unknown	CS	0.714763	0.188212	0	0	0.0565242	0.131891	0.674018	1.0859
AGAP010469		Unknown	CS	1.25494	0.168601	0	0	0.348589	0.189868	0.508713	1.59726
AGAP012327		Unknown	CS	1.3194	0.11871	0	0	0.100525	0.138582	0.99447	1.62313
AGAP004166		Unknown	CS	1.64749	0.118627	0	0	0.310043	0.078788	1.45506	3.36302
AGAP005714		Unknown	CS	2.42266	0.0260203	0	0	0.0381102	0.123247	1.74858	2.50944
AGAP004832		Unknown	CS	2.66911	0	0	0	0.594996	0	2.85306	3.84899
AGAP005072		Unknown	CS	1.89524	0	0	0	0	0	1.92645	4.35935
AGAP003880		Unknown	CS	0.69271	0	0	0	0	0	1.19951	1.29107
AGAP001203		Unknown	CS	0.212193	0	0	0	0	0.160305	0.985231	1.94405
AGAP006525		Unknown	CS	0.74803	0	0	0	0.270056	0.0608145	0.862059	1.21508
AGAP002678		Unknown	CS	1.69479	0	0	0	0	0	0.753717	1.72933
AGAP006793		Unknown	CS	1.45465	0	0	0	0	0	0.687928	2.62187
AGAP002828		Unknown	CS	1.62932	0	0	0	0.227845	0.0159524	0.671912	2.88965
AGAP007556		Unknown	CS	0.412428	0	0	0	0.235459	0	0.520898	1.22676
AGAP006278		Odorant-binding protein 99a - Drosophila melanogaster	CSR	7.89902	8.67084	9.23454	8.48639	0.986061	4.14251	1.9388	1.26253
AGAP028120	D7L3	D7 long form salivary protein [Source:VB Community Annotation]	CSR	7.47964	6.78625	6.80843	5.89484	0.173173	1.14872	1.5429	2.06991
AGAP008280	D7r5	D7 short form salivary protein [Source:VB Community Annotation]	CSR	5.40188	5.85795	5.79861	4.97757	0.268912	0.97663	1.46691	1.63412
AGAP000426		benzodiazapine receptor [Source:VB Community Annotation]	CSR	2.5035	4.74186	2.44029	3.06565	0	1.28634	1.0402	0.824235
AGAP001499	GPRMTN	putative melatonin receptor [Source:VB Community Annotation]	CSR	3.56167	3.07589	2.58564	2.80081	0	0.697153	0.943436	3.9118
AGAP000095		anoctamin 5 [Source:VB Community Annotation]	CSR	2.96622	3.55151	2.2916	2.26036	0	0.682902	0.429052	0.830061
AGAP001894		arrestin domain-containing protein 3 [Source:VB Community Annotation]	CSR	1.19359	3.56527	0.501428	2.13065	0.0643463	0.283637	0.702483	0
AGAP009770	GPRCAL1	putative calcitonin receptor 1 [Source:VB Community Annotation]	CSR	2.15676	2.47133	2.18453	1.80606	0.128004	1.00926	0.766123	3.26659
AGAP008051	SAP1	sensory appendage protein 1 [Source:VB Community Annotation]	CSR	2.20999	0.355513	1.01044	1.35549	0	1.15736	1.14823	1.34386
AGAP003725		Extended synaptotagmin-like protein 2a [Source:VB Community Annotation]	CSR	1.71264	2.79701	1.21545	0.910886	0.0982831	1.22396	1.53464	2.75465
AGAP009776		anoctamin-10 [Source:VB Community Annotation]	CSR	1.17723	0.845395	0	0.855676	0	0	0.623445	0.160269
AGAP005060	GPRNND2	putative GPCR class d orphan receptor 2 [Source:VB Community Annotation]	CSR	1.60186	1.12392	0.253202	0.837892	0	0.209071	1.58632	0.658985
AGAP008819	EGFR	putative epidermal growth factor receptor [Source:VB Community Annotation]	CSR	1.67146	0.483952	0.361802	0.7972	0.225074	0.453144	0.730634	1.91985
AGAP006119		ODR-4 family	CSR	0.846889	2.79993	0.994872	0.704563	0.103409	0	0.171272	1.04864
AGAP004223	GPR5HT7	putative serotonin 5HT-7 receptor [Source:VB Community Annotation]	CSR	1.94027	0.941043	1.50242	0.693014	0.156233	0.499235	0.219579	0.340285
AGAP004850	GPRSTN	putative stan-like receptor [Source:VB Community Annotation]	CSR	2.554	0.893746	0.302338	0.672081	0.471957	0.416314	1.38906	1.96025
AGAP000278	OBP9	odorant-binding protein 9 [Source:VB Community Annotation]	CSR	0.668119	0.787879	0.720688	0.601582	0	0.324978	1.30761	0.267783
AGAP009805	Gr9	gustatory receptor 9 [Source:VB Community Annotation]	CSR	4.01026	0.426799	0.33712	0.559527	0.195513	0.485909	3.24793	6.14637
AGAP002025	OBP11	odorant-binding protein 11 [Source:VB Community Annotation]	CSR	0.253378	0.294289	0	0.526665	0	0.333621	0.688464	1.6505
AGAP004433	Obp19	odorant-binding protein 19 [Source:VB Community Annotation]	CSR	1.01045	0.419291	0.20951	0.505047	0	0.0695424	0.831122	1.67202
AGAP008281	D7r4	D7 short form salivary protein [Source:VB Community Annotation]	CSR	1.45136	0.942239	0.880988	0.496402	0.174337	0.067087	1.30496	1.31713
AGAP009393	Or47	odorant receptor 47 [Source:VB Community Annotation]	CSR	1.70293	0.308196	0.167568	0.433754	0.10774	0.275817	1.9976	2.76987
AGAP002881	GPRNPR1	putative neuropeptide receptor 1 [Source:VB Community Annotation]	CSR	1.7729	0.0483782	0	0.420331	0.148087	0.104553	0.219054	2.18376
AGAP009804	Gr10	gustatory receptor 10 [Source:VB Community Annotation]	CSR	2.38493	0.237161	0.40287	0.418162	0.276706	0	1.07628	2.55503
AGAP001962	GPRVPR1	GPCR vasopressin family receptor 1 [Source:VB Community Annotation]	CSR	1.12346	0	0.816723	0.405073	0.202826	0.271491	1.95484	4.1754
AGAP008237		putative G-protein coupled receptor GPCR [Source:VB Community Annotation]	CSR	0.54464	0.63704	0	0.395584	0	0.248931	0.990921	2.55876
AGAP009396	Or13	odorant receptor 13 [Source:VB Community Annotation]	CSR	1.46116	0.781981	0.334658	0.376122	0	0.226084	1.32587	3.33
AGAP009803	Gr11	gustatory receptor 11 [Source:VB Community Annotation]	CSR	1.65942	0.402499	0.144436	0.373059	0.344378	0	1.50634	2.04698
AGAP009412	Or50	odorant receptor 50 [Source:VB Community Annotation]	CSR	4.7218	0.346415	0.204995	0.345964	0.122034	0.301508	5.13558	6.4466
AGAP002886	GPRNNA2	putative GPCR class a orphan receptor 2 [Source:VB Community Annotation]	CSR	1.68061	1.35773	0.238711	0.343046	0.103463	0.379388	1.44896	3.88197
AGAP009995		anoctamin 10 [Source:VB Community Annotation]	CSR	2.45241	0	0	0.311289	0.391942	0.0910872	4.43438	5.4691
AGAP001891		arrestin domain-containing protein 3 [Source:VB Community Annotation]	CSR	2.58887	1.22321	0.543739	0.294494	0	0	1.25683	2.89469
AGAP003972	GPRCIR	putative cirl/latrotoxin receptor [Source:VB Community Annotation]	CSR	0.948984	0.174386	0.998635	0.288888	0.203306	0.311733	0.682239	2.20862
AGAP008644	GPRMGL2	putative metabotropic glutamate receptor 2 [Source:VB Community Annotation]	CSR	1.17954	0.117251	0	0.269757	0.313104	0	0.912552	1.35248
AGAP009413	Or20	odorant receptor 20 [Source:VB Community Annotation]	CSR	1.88047	0.0718785	0	0.269095	0.148902	0.113737	0.388058	0.923782
AGAP009802	Gr12	gustatory receptor 12 [Source:VB Community Annotation]	CSR	1.28704	0.139687	0.0605151	0.257998	0.248996	0	0.886432	2.44266
AGAP000638	OBP32	odorant-binding protein 32 [Source:VB Community Annotation]	CSR	1.16123	0	0.256267	0.257975	0.399189	0.309183	1.45614	2.04731
AGAP003654	GPRCAL3	putative calcitonin receptor 3 [Source:VB Community Annotation]	CSR	1.1663	0.0634097	0.0573542	0.254628	0.334562	0.205377	1.5516	1.87886
AGAP003098	Gr23	gustatory receptor 23 [Source:VB Community Annotation]	CSR	0.551105	0.153013	0	0.250312	0	0.192046	0.354474	1.0835
AGAP007756	Gr46	gustatory receptor 46 [Source:VB Community Annotation]	CSR	1.23662	0.52474	0.244087	0.240296	0.228148	0.209858	2.38032	1.25572
AGAP009661	GPRNNB2	putative GPCR class b orphan receptor 2 [Source:VB Community Annotation]	CSR	0.940538	0	0	0.239982	0	0.203442	0.771174	0.765315
AGAP013436	IR140.2	ionotropic receptor IR140.2 [Source:VB Community Annotation]	CSR	2.37729	0.109186	0.515773	0.236745	0	0	1.05586	1.69513
AGAP009718	Or72	odorant receptor 72 [Source:VB Community Annotation]	CSR	0.299682	0	0	0.233741	0.14746	0	1.0369	2.70084
AGAP005464	GPRDIH1	putative diuretic insect hormone receptor 1 [Source:VB Community Annotation]	CSR	1.21886	0.261583	0.0556586	0.220137	0.239135	0	2.2549	5.0822
AGAP001561	PGE2R	putative GPCR class a orphan receptor 5 [Source:VB Community Annotation]	CSR	0.826887	0.155806	0.0645531	0.214342	0.265895	0.153862	0.991082	0.667114
AGAP001379	GPRCCK2	putative gastrin/cholecystokinin receptor 2 [Source:VB Community Annotation]	CSR	1.58713	0.417697	0	0.204504	0.323979	0.485844	0.718806	2.08495
AGAP013285	IR7u	ionotropic receptor IR7u [Source:VB Community Annotation]	CSR	0	0.206039	0.43796	0.199884	0	0.107196	0.326278	0.543654
AGAP007757	Gr45	gustatory receptor 45 [Source:VB Community Annotation]	CSR	1.81448	0.355281	0.269033	0.192651	0	0.210315	1.86072	3.73359
AGAP004971	Or35	odorant receptor 35 [Source:VB Community Annotation]	CSR	0.893627	0.192361	0	0.191878	0	0	1.105	2.21833
AGAP001811	IR75h.1	ionotropic receptor IR75h.1 [Source:VB Community Annotation]	CSR	0.861451	0	0.165178	0.190007	0	0	0.775849	3.54105
AGAP013324		putative G-protein coupled receptor GPCR [Source:VB Community Annotation]	CSR	1.85372	0.0982788	0	0.187284	0	0	1.63804	1.41422
AGAP011991	Or61	odorant receptor 61 [Source:VB Community Annotation]	CSR	2.75297	0.154559	0.385032	0.179066	0	0.0697808	2.65988	4.20321
AGAP004354	Or26	odorant receptor 26 [Source:VB Community Annotation]	CSR	1.45315	0	0.0590225	0.178	0	0	1.45087	2.80178
AGAP004675	GPRMAC2	putative muscarinic acetylcholine receptor 2 [Source:VB Community Annotation]	CSR	1.54763	0.160215	0	0.177139	0	0.200436	2.01057	4.32964
AGAP002639	Or39	odorant receptor 39 [Source:VB Community Annotation]	CSR	0.786082	0	0	0.175852	0.190074	0	1.27877	1.35937
AGAP009398	Or15	odorant receptor 15 [Source:VB Community Annotation]	CSR	1.97759	0.90811	0	0.171956	0.113621	0.0597858	1.31124	4.58906
AGAP004453	GPRDOP3	GPCR Dopamine Family 3 [Source:VB Community Annotation]	CSR	1.77517	0.196561	0	0.170969	0.324101	0.15555	3.15245	5.08355
AGAP000667	GPRDOP2	GPCR Dopamine Family 2 [Source:VB Community Annotation]	CSR	0.312464	0	0	0.168167	0	0	0.677767	2.95524
AGAP002891	GPRMGL4	putative metabotropic glutamate receptor 4 [Source:VB Community Annotation]	CSR	0.414499	0.213347	0.158894	0.16533	0.177655	0	1.53665	1.61377
AGAP028630	GPRNNA13	putative GPCR class a orphan receptor 13 [Source:VB Community Annotation]	CSR	1.11986	0.0775518	0	0.15516	0	0.0805788	1.01776	1.76574
AGAP006666	Or48	odorant receptor 48 [Source:VB Community Annotation]	CSR	1.34762	0.189553	0.287508	0.155053	0.438073	0.348562	1.56229	3.19714
AGAP003253	Gr15	gustatory receptor 15 [Source:VB Community Annotation]	CSR	1.64173	0	0	0.153593	0	0	1.50327	3.25041
AGAP001171	Gr50	gustatory receptor 50 [Source:VB Community Annotation]	CSR	1.68969	0	0	0.149152	0	0.192261	1.22016	3.0229
AGAP006667	Or49	odorant receptor 49 [Source:VB Community Annotation]	CSR	2.80881	0.308303	0.321433	0.143494	0.342102	0.209944	0.980796	2.84808
AGAP011631	Or11	odorant receptor 11 [Source:VB Community Annotation]	CSR	1.83313	0	0.157891	0.142174	0	0	1.06199	4.59378
AGAP005681	GPRNNA21	putative GPCR class a orphan receptor 21 [Source:VB Community Annotation]	CSR	0.349469	0	0	0.138048	0	0.207828	0.320977	2.20142
AGAP001892		arrestin domain-containing protein 3 [Source:VB Community Annotation]	CSR	0.184539	0.392486	0.0504903	0.133287	0	0	0.967161	0.97582
AGAP001121	Gr60	gustatory receptor 60 [Source:VB Community Annotation]	CSR	2.02606	0.292069	0.299618	0.125649	0.0804862	0.194981	2.60006	3.4518
AGAP006691	IR139	ionotropic receptor IR139 [Source:VB Community Annotation]	CSR	0.652747	0.114175	0	0.123766	0	0.0494759	0.650649	2.25747
AGAP009719	Or73	odorant receptor 73 [Source:VB Community Annotation]	CSR	0.265821	0	0	0.123492	0.363542	0.200178	1.76866	2.91716
AGAP001303	SAP1	chemosensory protein 6 [Source:VB Community Annotation]	CSR	1.52765	0	0	0.122518	0	0.22918	0.826614	1.46709
AGAP000801	GLURIIb	ionotropic receptor GLURIIb [Source:VB Community Annotation]	CSR	1.49297	0	0	0.121214	0.361548	0.0917906	1.77589	4.42609
AGAP005465	GPRDIH2	putative diuretic insect hormone receptor 2 [Source:VB Community Annotation]	CSR	3.25429	0.0560807	0	0.121143	0	0.0675254	3.02006	3.92537
AGAP009707	Or71	odorant receptor 71 [Source:VB Community Annotation]	CSR	0.595597	0	0	0.12083	0	0	0.770617	2.55842
AGAP009397	Or55	odorant receptor 55 [Source:VB Community Annotation]	CSR	1.63035	0.483614	0.627619	0.114897	0	0.25228	0.852217	2.67924
AGAP006143	Gr56	gustatory receptor 56 [Source:VB Community Annotation]	CSR	1.46177	0.15264	0	0.113843	0	0.157604	1.48894	2.12393
AGAP003244	GPRGHP2	putative growth hormone releasing hormone receptor 2 [Source:VB Community Annotation]	CSR	1.50075	0	0	0.111851	0	0.162344	1.71124	3.79685
AGAP001173	Gr52	gustatory receptor 52 [Source:VB Community Annotation]	CSR	0.795047	0.095714	0	0.108713	0	0	0.740012	1.82327
AGAP009720	Or74	odorant receptor 74 [Source:VB Community Annotation]	CSR	0.895449	0	0	0.104434	0.328422	0	0.786177	2.47523
AGAP003658	GPRALS1	putative allatostatin receptor 1 [Source:VB Community Annotation]	CSR	1.14197	0	0	0.103277	0.223833	0.202194	0.569032	2.39406
AGAP007498	IR75k	ionotropic receptor IR75k [Source:VB Community Annotation]	CSR	1.60982	0.313525	0	0.101961	0.046699	0.411761	1.47226	3.75002
AGAP008347	GPRRK	putative glycoprotein hormone rk-like receptor [Source:VB Community Annotation]	CSR	0.259483	0	0	0.0917638	0.204079	0.185472	0.955574	3.47683
AGAP012427		putative GPCR class a orphan receptor 16 [Source:VB Community Annotation]	CSR	0.653344	0.104362	0	0.0910449	0	0.185892	0.858216	2.10316
AGAP001532		putative gonadotrophin releasing hormone receptor 3 [Source:VB Community Annotation]	CSR	1.69581	0.120692	0	0.0892657	0	0	1.22355	2.57689
AGAP011481	GPR5HT1B	putative serotonin 5HT-1b receptor [Source:VB Community Annotation]	CSR	1.4216	0.141317	0.235325	0.0887679	0.113505	0.10446	1.50613	3.50094
AGAP009411	Or20	Unknown	CSR	1.09805	0.251758	0	0.0844573	0.20136	0.162354	3.06266	4.03463
AGAP001137	Gr59	gustatory receptor 59 [Source:VB Community Annotation]	CSR	0.434386	0.234885	0	0.0832072	0.248263	0	1.2116	2.15239
AGAP003310	Or66	odorant receptor 66 [Source:VB Community Annotation]	CSR	1.69904	0	0	0.0815131	0.233527	0.192242	0.967321	2.5872
AGAP001114	Gr38	gustatory receptor 38 [Source:VB Community Annotation]	CSR	1.23506	0	0	0.0806578	0.475207	0.271792	1.58757	2.13287
AGAP002824	GPRTAK1	putative tachykinin receptor 1 [Source:VB Community Annotation]	CSR	3.61889	0	0	0.0780491	0.11235	0.125745	2.40103	4.67851
AGAP006440	IR136	ionotropic receptor IR136 [Source:VB Community Annotation]	CSR	1.69856	0	0	0.0748434	0	0	1.2594	1.23673
AGAP007951	IR68a	ionotropic receptor IR68a [Source:VB Community Annotation]	CSR	1.46774	0.247153	0	0.0738137	0	0.285635	1.63916	3.08107
AGAP004114	Gr1	gustatory receptor 1 [Source:VB Community Annotation]	CSR	2.47162	0	0	0.0709932	0.0846669	0	1.39309	1.63076
AGAP010513	GPRMAC1	putative muscarinic acetylcholine receptor 1 [Source:VB Community Annotation]	CSR	1.99985	0.134923	0	0.0693344	0	0	1.65413	2.55704
AGAP001122	Gr41	gustatory receptor 41 [Source:VB Community Annotation]	CSR	1.84769	0.291489	0.13867	0.0688602	0.228427	0.176631	1.77022	3.72757
AGAP009111	Or29	odorant receptor 29 [Source:VB Community Annotation]	CSR	0.673139	0	0	0.0636276	0.118557	0	0.627563	1.91022
AGAP010281	GPRGBB1	putative GABA-B receptor 1 [Source:VB Community Annotation]	CSR	2.36179	0.140306	0	0.0618471	0.134995	0.306759	3.3218	5.25119
AGAP001812	IR75h.2	ionotropic receptor IR75h.2 [Source:VB Community Annotation]	CSR	0.310672	0	0	0.0615767	0.229377	0	0.300043	2.07298
AGAP002560	Orco	odorant receptor obligate co-receptor (Orco%2C Or7) [Source:VB Community Annotation]	CSR	0	0.187824	0.0627566	0.0604955	0.150883	0	2.15811	3.16191
AGAP004974	Or31	odorant receptor 31 [Source:VB Community Annotation]	CSR	1.78258	0	0	0.057464	0.250472	0.13276	0.563097	1.20559
AGAP004969	IR75d	ionotropic receptor IR75d [Source:VB Community Annotation]	CSR	0.366447	0.200293	0	0.055955	0.132633	0	0.879968	0.574858
AGAP004035	GPRFSH	putative glyco-protein hormone fsh-like receptor [Source:VB Community Annotation]	CSR	0.122667	0	0	0.0530059	0.258936	0	0.517214	1.29498
AGAP013149	GPROP1	long wavelength sensitive opsin [Source:VB Community Annotation]	CSR	0.613932	0.0875366	0	0.0500698	0	0.273793	0.261579	1.76507
AGAP004595	GPRGBB2	putative GABA-B receptor 2 [Source:VB Community Annotation]	CSR	1.08562	0.0379409	0	0.0498357	0.0530484	0.216045	0.696896	3.29914
AGAP004879		Unknown	CSR	2.20785	0	0	0.0496787	0.720428	0	2.61782	2.4419
AGAP005527	NMDAR3	ionotropic receptor NMDAR3 [Source:VB Community Annotation]	CSR	0.550565	0.0861041	0.0572032	0.0452049	0.0571238	0.117876	0.404524	1.67817
AGAP000803	GLURIIa	ionotropic receptor GLURIIa [Source:VB Community Annotation]	CSR	0	0.37278	0.467579	0.0430882	0.0979567	0	0.726767	1.03432
AGAP011968	IR76b	ionotropic receptor IR76b [Source:VB Community Annotation]	CSR	2.88865	0	0.051577	0.0385909	0	0.304198	1.30693	1.00842
AGAP000640	OBP33	odorant-binding protein 33 [Source:VB Community Annotation]	CSR	1.42709	0	0.127428	0.0371846	0.235561	0.21421	1.21124	2.22058
AGAP001175	GPRCAL2	putative calcitonin receptor 2 [Source:VB Community Annotation]	CSR	1.13091	0.437812	0.101442	0.0345323	0	0.0507706	2.02726	4.19337
AGAP009007	GPRNNB1	putative GPCR class b orphan receptor 1 [Source:VB Community Annotation]	CSR	2.37296	0	0.102208	0.0311754	0	0	1.30272	3.43678
AGAP010474		anoctamin 5 [Source:VB Community Annotation]	CSR	2.25582	0.348251	0	0.0294034	0.3666	0	2.38373	4.65095
AGAP001409	OBP3	odorant-binding protein antennal 3 [Source:VB Community Annotation]	CSR	0.970394	0	0	0.0270283	0.120406	0	1.71612	4.83497
AGAP006874	Gr29	gustatory receptor 29 [Source:VB Community Annotation]	CSR	1.14912	0	0	0.0268946	0.491651	0.161064	1.06108	2.3783
AGAP002229		putative G-protein coupled receptor GPCR [Source:VB Community Annotation]	CSR	1.60377	0	0.109674	0.0200261	0.422791	0	0.433366	2.56325
AGAP010272	IR25a	ionotropic receptor IR25a [Source:VB Community Annotation]	CSR	2.68873	0	0	0.0198838	0	0.196345	1.90283	3.9962
AGAP002888	GPRNNA3	putative GPCR class a orphan receptor 3 [Source:VB Community Annotation]	CSR	2.1996	0.13132	0.153085	0.0130499	0.430364	0.029879	1.99675	4.08666
AGAP009409	Or51	odorant receptor 51 [Source:VB Community Annotation]	CSR	1.58219	0.236591	0.360879	0	0.226999	0.109608	1.23259	4.24077
AGAP011467	Or5	odorant receptor 5 [Source:VB Community Annotation]	CSR	1.43732	0.448905	0.323716	0	0.27191	0	1.0858	1.48334
AGAP009408	Or14	odorant receptor 14 [Source:VB Community Annotation]	CSR	1.27847	0.0830679	0.288681	0	0.180993	0	0.773764	3.52409
AGAP004278	Or42	odorant receptor 42 [Source:VB Community Annotation]	CSR	1.93111	0.0978834	0.283345	0	0.118463	0.144416	2.1004	2.39152
AGAP002156	GPRGNR1	putative gonadotrophin releasing hormone receptor 1 [Source:VB Community Annotation]	CSR	2.08544	0.378696	0.248587	0	0.10736	0.16154	1.11773	2.24698
AGAP002044	Or77	odorant receptor 77 [Source:VB Community Annotation]	CSR	0.273214	0	0.227504	0	0	0.135125	1.16072	2.84831
AGAP001478	NMDAR1	ionotropic receptor NMDAR1 [Source:VB Community Annotation]	CSR	1.91518	0.172452	0.216623	0	0.278334	0.205032	2.13912	2.75459
AGAP011320		putative G-protein coupled receptor GPCR [Source:VB Community Annotation]	CSR	1.54171	0.168774	0.148972	0	0	0.269589	1.33815	3.26338
AGAP001773	GPRALS2	putative allatostatin receptor 2 [Source:VB Community Annotation]	CSR	0.947028	0.125252	0.137466	0	0.224987	0.0921608	1.85443	1.75221
AGAP001123	Gr36	gustatory receptor 36 [Source:VB Community Annotation]	CSR	3.762	0.119238	0.12141	0	0.243182	0.0870663	1.3311	4.08682
AGAP005001	GPRNNA17	putative GPCR class a orphan receptor 17 [Source:VB Community Annotation]	CSR	1.10277	0	0.045742	0	0	0	1.29431	3.1837
AGAP005034	GPRMGL5	putative metabotropic glutamate receptor 5 [Source:VB Community Annotation]	CSR	0	0.243797	0.0374378	0	0.127245	0.242745	1.37721	2.26679
AGAP009514	GPRGBB3	putative GABA-B receptor 3 [Source:VB Community Annotation]	CSR	0.689746	0.117041	0.0365934	0	0.0804978	0.213422	0.339238	1.72058
AGAP008059	CSP1	chemosensory protein 1 [Source:VB Community Annotation]	CSR	1.06306	0	0	0	0.0670166	0	0.39026	3.04113
AGAP008062	CSP4	chemosensory protein 4 [Source:VB Community Annotation]	CSR	0.636258	0	0	0	0.141646	0.131028	1.39315	1.5799
AGAP008058		chemosensory protein 5 [Source:VB Community Annotation]	CSR	0.614637	0	0	0	0.0820518	0	0.692282	1.60292
AGAP008279	D7L2	D7 long form salivary protein [Source:VB Community Annotation]	CSR	0	0	0	0	0	0	1.33337	3.28169
AGAP008278	D7L1	D7 long form salivary protein [Source:VB Community Annotation]	CSR	0.210572	0	0	0	0	0	0.986992	2.10355
AGAP008284	D7r1	D7 short form salivary protein [Source:VB Community Annotation]	CSR	1.17421	0.273383	0	0	0	0	1.81717	3.30992
AGAP008282	D7r2	D7 short form salivary protein [Source:VB Community Annotation]	CSR	1.40858	0	0	0	0.167983	0	1.98476	3.17635
AGAP008283	D7r3	D7 short form salivary protein [Source:VB Community Annotation]	CSR	0	0	0	0	0.168611	0	1.23177	1.94441
AGAP004613	GPRDOP1	GPCR Dopamine Family 1 [Source:VB Community Annotation]	CSR	1.96674	0.159315	0	0	0	0.0941458	1.63204	2.91557
AGAP001961	GPRVPR2	GPCR vasopressin family receptor 2 [Source:VB Community Annotation]	CSR	0.430757	0	0	0	0	0	1.40975	2.2666
AGAP028572		Gustatory receptor [Source:UniProtKB/TrEMBL%3BAcc:A0A1S4HDS4]	CSR	0	0	0	0	0.331372	0.130098	0.760336	2.02988
AGAP003258	Gr19	Gustatory receptor [Source:UniProtKB/TrEMBL%3BAcc:Q7PTR1]	CSR	0.262424	0	0	0	0	0	0.713217	2.02608
AGAP002635	Gr13	gustatory receptor 13 [Source:VB Community Annotation]	CSR	1.46837	0	0	0	0	0	0.768928	2.0695
AGAP003256	Gr18	gustatory receptor 18 [Source:VB Community Annotation]	CSR	1.57722	0	0	0	0	0	0.803459	2.19934
AGAP009999	Gr22	gustatory receptor 22 [Source:VB Community Annotation]	CSR	0.475109	0	0	0	0	0	1.48428	1.49945
AGAP004727	Gr25	gustatory receptor 25 [Source:VB Community Annotation]	CSR	0.421812	0.120306	0	0	0	0.105561	1.20389	2.62851
AGAP006717	Gr26	gustatory receptor 26 [Source:VB Community Annotation]	CSR	0.799932	0	0	0	0	0.353725	0.658205	1.6966
AGAP009858	Gr3	gustatory receptor 3 [Source:VB Community Annotation]	CSR	0.290601	0	0	0	0.180514	0	1.62819	4.11739
AGAP006875	Gr30	gustatory receptor 30 [Source:VB Community Annotation]	CSR	0.330626	0	0	0	0	0.11003	0.607703	1.82623
AGAP006877	Gr32	gustatory receptor 32 [Source:VB Community Annotation]	CSR	1.96361	0.065353	0	0	0.139174	0	2.23568	2.19121
AGAP001117	Gr37	gustatory receptor 37 [Source:VB Community Annotation]	CSR	1.94582	0.0438728	0	0	0.0317066	0.213765	2.06532	4.34789
AGAP001119	Gr39	gustatory receptor 39 [Source:VB Community Annotation]	CSR	0.606851	0	0	0	0	0	1.57889	2.14025
AGAP009857	Gr4	gustatory receptor 4 [Source:VB Community Annotation]	CSR	0.19253	0	0	0	0	0	0.939498	2.31733
AGAP001115	Gr42	gustatory receptor 42 [Source:VB Community Annotation]	CSR	1.01847	0	0	0	0.453441	0.369766	2.66917	3.28938
AGAP009256	Gr44	gustatory receptor 44 [Source:VB Community Annotation]	CSR	1.1754	0.0456176	0	0	0	0.146963	1.45257	1.42787
AGAP005514	Gr47	gustatory receptor 47 [Source:VB Community Annotation]	CSR	0.749854	0	0	0	0.309395	0.231251	1.10414	1.98967
AGAP001169	Gr49	gustatory receptor 49 [Source:VB Community Annotation]	CSR	3.23913	0.140638	0	0	0	0	0.938173	3.79247
AGAP009853	Gr5	gustatory receptor 5 [Source:VB Community Annotation]	CSR	0.633526	0.109801	0	0	0	0	0.72789	1.5606
AGAP002633	Gr53	gustatory receptor 53 [Source:VB Community Annotation]	CSR	0.874922	0	0	0	0.20973	0.0921912	1.26642	2.38607
AGAP004313	Gr54	gustatory receptor 54 [Source:VB Community Annotation]	CSR	0.619082	0.0731143	0	0	0.257815	0.232382	0.901532	2.00044
AGAP004716	Gr57	gustatory receptor 57 [Source:VB Community Annotation]	CSR	1.79262	0.0659573	0	0	0	0	2.65975	3.81446
AGAP001125	Gr58	gustatory receptor 58 [Source:VB Community Annotation]	CSR	0	0	0	0	0	0	0.899492	3.86008
AGAP009855	Gr7	gustatory receptor 7 [Source:VB Community Annotation]	CSR	0.85967	0	0	0	0	0	1.20798	2.24555
AGAP009856	Gr8	gustatory receptor 8 [Source:VB Community Annotation]	CSR	0	0	0	0	0.0817364	0	1.34939	1.82925
AGAP000798	GLURIIc	ionotropic receptor GLURIIc [Source:VB Community Annotation]	CSR	1.18343	0	0	0	0	0	1.59581	1.46022
AGAP002797	GLURIId	ionotropic receptor GLURIId [Source:VB Community Annotation]	CSR	1.32298	0.0503708	0	0	0.187601	0	1.07816	0.378342
AGAP012447	GLURIIe	ionotropic receptor GLURIIe [Source:VB Community Annotation]	CSR	0.786712	0	0	0	0	0	0.809722	1.39507
AGAP013242	IR140.1	ionotropic receptor IR140.1 [Source:VB Community Annotation]	CSR	2.10062	0	0	0	0.0579241	0	1.65924	2.51273
AGAP013473		ionotropic receptor IR141 [Source:VB Community Annotation]	CSR	1.25734	0.172159	0	0	0.603142	0.146861	1.4985	3.31977
AGAP008511	IR21a	ionotropic receptor IR21a [Source:VB Community Annotation]	CSR	0.699077	0	0	0	0.208299	0.0609128	0.187757	1.87897
AGAP009014	IR31a	ionotropic receptor IR31a [Source:VB Community Annotation]	CSR	0.439867	0	0	0	0	0	1.02707	1.12973
AGAP002904	IR41a	ionotropic receptor IR41a [Source:VB Community Annotation]	CSR	1.74187	0.197414	0	0	0	0.402112	2.31639	2.99493
AGAP004432	IR41t.1	ionotropic receptor IR41t.1 [Source:VB Community Annotation]	CSR	1.0492	0	0	0	0.124443	0	0.962913	2.21814
AGAP012969	IR41t.2	ionotropic receptor IR41t.2 [Source:VB Community Annotation]	CSR	0.77924	0	0	0	0.251827	0.0830293	0.82373	1.8722
AGAP004923	IR64a	ionotropic receptor IR64a [Source:VB Community Annotation]	CSR	0.891609	0	0	0	0.259455	0	1.61582	3.34045
AGAP010411	IR8a	ionotropic receptor IR8a [Source:VB Community Annotation]	CSR	0.851624	0	0	0	0	0.0777196	0.733204	2.78883
AGAP000256	IR93a	ionotropic receptor IR93a [Source:VB Community Annotation]	CSR	0.687811	0.24695	0	0	0.0868115	0	1.383	2.48881
AGAP012429	NMDAR2	ionotropic receptor NMDAR2 [Source:VB Community Annotation]	CSR	2.31676	0.542131	0	0	0	0.221072	1.64976	3.46969
AGAP009640	Or1	odorant receptor 1 [Source:VB Community Annotation]	CSR	0.576905	0	0	0	0	0	0.573719	2.40968
AGAP009520	Or10	odorant receptor 10 [Source:VB Community Annotation]	CSR	1.10767	0.564491	0	0	0	0.0668298	1.48527	2.76376
AGAP009394	Or16	odorant receptor 16 [Source:VB Community Annotation]	CSR	2.33315	0.171146	0	0	0	0.164675	2.30843	2.3646
AGAP009395	Or17	odorant receptor 17 [Source:VB Community Annotation]	CSR	0.870537	0.201091	0	0	0.0747384	0.309917	0.65201	2.02051
AGAP007797	Or23	odorant receptor 23 [Source:VB Community Annotation]	CSR	2.07496	0	0	0	0	0	1.56382	2.35686
AGAP010507	Or24	odorant receptor 24 [Source:VB Community Annotation]	CSR	2.38936	0.559933	0	0	0.159411	0	1.84595	3.26407
AGAP004355	Or27	odorant receptor 27 [Source:VB Community Annotation]	CSR	0.257619	0	0	0	0	0	0.79408	1.68389
AGAP011469	OR3	odorant receptor 3 [Source:VB Community Annotation]	CSR	1.68454	0	0	0	0	0	1.34917	1.28362
AGAP002125	Or34	odorant receptor 34 [Source:VB Community Annotation]	CSR	1.71576	0	0	0	0	0	1.82146	3.98972
AGAP002640	Or38	odorant receptor 38 [Source:VB Community Annotation]	CSR	1.16128	0	0	0	0	0	0.723805	3.52298
AGAP010504	Or43	odorant receptor 43 [Source:VB Community Annotation]	CSR	0.50425	0.244996	0	0	0	0.293554	0.740215	1.76785
AGAP010505	Or44	odorant receptor 44 [Source:VB Community Annotation]	CSR	0.433256	0.0896444	0	0	0	0.157261	0.726793	2.56446
AGAP004067	Or58	odorant receptor 58 [Source:VB Community Annotation]	CSR	0.504334	0	0	0	0	0	1.07597	1.7179
AGAP006167	Or6	odorant receptor 6 [Source:VB Community Annotation]	CSR	0.841002	0	0	0	0	0	0.449555	2.1588
AGAP009706	Or70	odorant receptor 70 [Source:VB Community Annotation]	CSR	0.698149	0	0	0	0.140243	0	0.705285	3.90282
AGAP002046	Or76	odorant receptor 76 [Source:VB Community Annotation]	CSR	0.419366	0	0	0	0	0.129491	0.619459	1.59147
AGAP008333	Or9	odorant receptor 9 [Source:VB Community Annotation]	CSR	1.02664	0	0	0	0.156167	0	0.473483	2.36042
AGAP029062	OBP1	odorant-binding protein 1 [Source:VB Community Annotation]	CSR	0.882444	0	0	0	0.405067	0.125355	1.19389	2.03951
AGAP002188	OBP12	odorant-binding protein 12 [Source:VB Community Annotation]	CSR	1.73394	0	0	0	0	0.176358	2.62196	1.87465
AGAP005208	OBP20	odorant-binding protein 20 [Source:VB Community Annotation]	CSR	0.319644	0	0	0	0	0	0.463146	3.138
AGAP012321	OBP26	odorant-binding protein 26 [Source:VB Community Annotation]	CSR	1.2203	0	0	0	0	0	1.6964	2.83415
AGAP012323	OBP27	odorant-binding protein 27 [Source:VB Community Annotation]	CSR	0	0.238499	0	0	0	0	1.37954	2.90914
AGAP000641	OBP34	odorant-binding protein 34 [Source:VB Community Annotation]	CSR	0.981521	0.24763	0	0	0.376229	0	0.49257	1.42564
AGAP002191	OBP40	odorant-binding protein 40 [Source:VB Community Annotation]	CSR	0.330377	0.30355	0	0	0	0	0.796884	2.02068
AGAP009402	OBP43	odorant-binding protein 43 [Source:VB Community Annotation]	CSR	1.02024	0	0	0	0	0.383324	1.1822	2.17369
AGAP006078	Obp52	odorant-binding protein 52 [Source:VB Community Annotation]	CSR	1.6614	0	0	0	0.563067	0	0.556055	2.46061
AGAP011368	OBP57	odorant-binding protein 57 [Source:VB Community Annotation]	CSR	2.02946	0.688078	0	0	0.194167	0.0640803	2.71813	4.79292
AGAP010489	OBP4	odorant-binding protein antennal 4 [Source:VB Community Annotation]	CSR	3.13134	0.230197	0	0	0	0.150575	1.57802	5.5675
AGAP001556	OBP7	odorant-binding protein antennal 7 [Source:VB Community Annotation]	CSR	1.62157	0.578951	0	0	0	0.214704	1.46555	2.77138
AGAP006368	Obp69	odorant-bnding protein [Source:VB Community Annotation]	CSR	1.4196	0.211784	0	0	0.132788	0	0.763439	1.90201
AGAP011452	GPRGRP1	putative gastrin/bombesin receptor 1 [Source:VB Community Annotation]	CSR	0.686989	0	0	0	0	0	1.08176	1.57218
AGAP003631	GPRGRP2	putative gastrin/bombesin receptor 2 [Source:VB Community Annotation]	CSR	0	0	0	0	0.218626	0	0.741005	2.1326
AGAP001022	GPRCCK1	putative gastrin/cholecystokinin receptor 1 [Source:VB Community Annotation]	CSR	1.07157	0.274801	0	0	0.401219	0	1.47027	2.48371
AGAP001807	GPRGPH	putative glycoprotein hormone gph-like receptor [Source:VB Community Annotation]	CSR	1.94794	0.0586617	0	0	0.317731	0.133231	2.31531	3.51156
AGAP001558	GPRGNR2	putative gonadotrophin releasing hormone receptor 2 [Source:VB Community Annotation]	CSR	0.187271	0	0	0	0.060331	0.0729787	0.38827	1.93774
AGAP004829	GPRNNA11	putative GPCR class a orphan receptor 11 [Source:VB Community Annotation]	CSR	1.26271	0.0762834	0	0	0.272733	0.463142	1.04964	3.48083
AGAP005002	GPRNNA18	putative GPCR class a orphan receptor 18 [Source:VB Community Annotation]	CSR	1.04542	0.209515	0	0	0.0517291	0	0.947456	3.79126
AGAP004034	GPRNNA4	putative GPCR class a orphan receptor 4 [Source:VB Community Annotation]	CSR	1.03703	0.0611812	0	0	0.0980135	0	1.45029	1.96637
AGAP003335	GPRNNA7	putative GPCR class a orphan receptor 7 [Source:VB Community Annotation]	CSR	0.157383	0.0489736	0	0	0	0	1.35328	1.65169
AGAP001562	GPRNNB3	putative GPCR class b orphan receptor 3 [Source:VB Community Annotation]	CSR	0.886579	0	0	0	0	0	0.473989	2.19011
AGAP000383		putative G-protein coupled receptor GPCR [Source:VB Community Annotation]	CSR	0.829267	0.0571359	0	0	0	0.255495	1.13771	2.6119
AGAP011646		putative G-protein coupled receptor GPCR [Source:VB Community Annotation]	CSR	0.863572	0	0	0	0	0.11654	1.49649	0.951238
AGAP003076	GPRGHP1	putative growth hormone releasing hormone receptor 1 [Source:VB Community Annotation]	CSR	1.47183	0	0	0	0.0576552	0	2.06054	4.74138
AGAP000658	GPRGHP3	putative growth hormone releasing hormone receptor 3 [Source:VB Community Annotation]	CSR	2.18249	0.112747	0	0	0	0.130859	1.69632	2.96662
AGAP010851	GPRLKK	putative leukokinin receptor [Source:VB Community Annotation]	CSR	1.5102	0.250337	0	0	0.170429	0	1.62273	3.23497
AGAP006156		putative metabotropic glutamate receptor 1 [Source:VB Community Annotation]	CSR	0.330781	0	0	0	0.144462	0	0.468204	3.074
AGAP012578	GPRMGL3	putative metabotropic glutamate receptor 3 [Source:VB Community Annotation]	CSR	1.58905	0	0	0	0	0.229598	0.955387	2.12356
AGAP008702	GPRNPR2	putative neuropeptide receptor 2 [Source:VB Community Annotation]	CSR	1.95128	0	0	0	0.197035	0	0.508727	2.81792
AGAP012378	GPRNPY3	putative neuropeptide Y receptor 3 [Source:VB Community Annotation]	CSR	1.18308	0	0	0	0	0	0.910096	2.21643
AGAP007136	GPR5HT1A	putative serotonin 5HT-1a receptor [Source:VB Community Annotation]	CSR	0.904654	0	0	0	0	0	0.679622	1.42035
AGAP002232	GPR5HT2A	putative serotonin 5HT-2a receptor [Source:VB Community Annotation]	CSR	0.950899	0.0462591	0	0	0.168043	0.067694	0.539552	1.93591
AGAP001592	GPRTAK2	putative tachykinin receptor 2 [Source:VB Community Annotation]	CSR	0.95416	0	0	0	0	0	0.55138	1.61188
AGAP002228		Unknown	CSR	1.51472	0	0	0	0.214083	0	1.01299	2.6288
AGAP004936		EGF repeats	D	15.1103	14.5659	16.5768	15.151	7.00704	11.5423	7.78801	6.49769
AGAP000305		SPARC [Source:VB Community Annotation]	D	13.4033	13.7524	14.2514	13.8364	3.79026	10.7721	3.9841	3.46782
AGAP002465		ferritin heavy chain [Source:VB Community Annotation]	D	11.6349	11.5227	12.359	11.5064	2.49668	7.86863	4.31144	3.32496
AGAP002464		secreted ferritin G subunit [Source:VB Community Annotation]	D	11.0092	10.7632	11.544	10.9683	2.64595	8.80501	2.15396	3.52407
AGAP010173	Rack1	guanine nucleotide-binding protein subunit beta-like protein [Source:VB Community Annotation]	D	9.69257	10.8759	10.3717	10.95	3.7455	9.17417	3.28044	3.15832
AGAP028370	ATP6	adenosine triphosphatase subunit 6 [Source:European Nucleotide Archive%3BAcc:ATP6]	D	11.7425	10.9365	10.841	10.9269	15.1813	13.7971	12.9984	9.06811
AGAP007120		nucleoside-diphosphate kinase [Source:VB Community Annotation]	D	9.59564	10.8059	9.64636	10.517	3.53764	8.12452	3.27271	1.57979
AGAP012407		protein disulfide-isomerase A1 [Source:VB Community Annotation]	D	7.30151	11.1931	10.4241	10.4752	1.98251	4.69377	2.52203	3.19085
AGAP002594		apolipoprotein D [Source:VB Community Annotation]	D	9.95531	10.802	11.0802	10.4214	0.898924	5.34379	1.69808	2.87639
AGAP006459	SUI1	Protein translation factor SUI1 homolog [Source:UniProtKB/Swiss-Prot%3BAcc:P42678]	D	8.67879	10.2547	10.5011	10.1251	2.62525	7.81239	2.88548	3.13734
AGAP002599		polyubiquitin [Source:VB Community Annotation]	D	8.76713	10.0694	10.3743	9.47358	1.78387	5.43193	2.13141	0.894119
AGAP007088		peptidyl-prolyl cis-trans isomerase B (cyclophilin B) [Source:VB Community Annotation]	D	8.36842	10.0341	8.76443	9.39983	0.716336	6.23168	1.93688	2.21627
AGAP001151		14-3-3 protein epsilon [Source:VB Community Annotation]	D	8.84658	9.68289	9.63185	9.37631	2.19548	6.43613	2.34931	3.487
AGAP011092		Polyadenylate-binding protein [Source:UniProtKB/TrEMBL%3BAcc:Q7QH99]	D	8.28568	9.31075	8.46472	9.37238	1.72411	6.6647	2.4413	2.65183
AGAP000462		peptidyl-prolyl isomerase F (cyclophilin D) [Source:VB Community Annotation]	D	8.00453	9.42892	8.61405	9.30999	2.87901	5.57597	2.28214	1.02314
AGAP008075		cellular nucleic acid-binding protein [Source:VB Community Annotation]	D	7.13905	9.77961	9.32235	9.30554	4.02419	6.27704	3.84567	3.48033
AGAP007643		Tyrosine 3-monooxygenase/tryptophan 5-monooxygenase activation protein%2C beta polypeptide 2 [Source:VB Community Annotation]	D	7.71499	9.64023	8.60034	9.23959	2.56968	7.09064	2.99374	6.46427
AGAP007393		protein disulfide isomerase family A%2C member 3 [Source:VB Community Annotation]	D	7.77084	10.1254	8.65666	9.18076	0.532993	4.84127	1.05927	1.30236
AGAP012334		high mobility group protein D%2C isoform C [Source:VB Community Annotation]	D	8.97993	9.71796	9.40456	9.03358	1.51595	7.52977	3.05022	4.19928
AGAP007699		GTP-binding nuclear protein Ran [Source:VB Community Annotation]	D	8.2276	9.90794	8.18418	8.9397	1.29019	6.07198	1.88165	2.44407
AGAP009668		lysosomal-associated membrane protein 1/2 [Source:VB Community Annotation]	D	9.14499	9.22522	10.3087	8.939	0.814452	3.63435	1.8729	4.36771
AGAP000852		Small ubiquitin-related modifier [Source:UniProtKB/TrEMBL%3BAcc:Q7PNJ2]	D	7.21816	9.05565	9.03497	8.83445	1.80739	5.61042	1.30231	2.86618
AGAP012014	Arf1	ADP-ribosylation factor 1 [Source:VB Community Annotation]	D	8.01075	9.61491	8.17253	8.65668	1.14886	6.24681	3.9541	6.26107
AGAP010957		calmodulin [Source:VB Community Annotation]	D	5.81674	8.22476	7.80806	8.59076	1.06561	4.6622	1.28173	1.28859
AGAP001082		saposin [Source:VB Community Annotation]	D	8.90115	9.26789	10.8688	8.49102	1.35284	4.02218	3.40639	6.44907
AGAP004395		nucleophosmin 3 [Source:VB Community Annotation]	D	6.41181	8.82048	6.48987	8.19429	0.79528	5.76752	1.68842	1.66784
AGAP004146		Ras-related protein Rab-1A [Source:VB Community Annotation]	D	6.99131	8.68431	8.72255	8.05212	1.17297	4.38489	2.90299	2.1862
AGAP012307		Spondin-1 [Source:VB Community Annotation]	D	6.46291	7.06737	8.56783	8.00934	0.0459813	3.13066	0.606706	0.58746
AGAP005504		phospholipid scramblase 1 [Source:VB Community Annotation]	D	7.85464	8.7779	8.51454	8.00003	1.4387	5.16713	2.57139	4.03033
AGAP010589		guanine nucleotide-binding protein subunit gamma [Source:VB Community Annotation]	D	6.43986	9.22277	7.66145	7.94396	0.406616	3.61497	0.518186	1.73481
AGAP002063		nucleolar protein 56 [Source:VB Community Annotation]	D	5.27769	7.9088	6.28599	7.77708	0.949706	3.66841	1.63161	1.25508
AGAP007209		Tetraspanin [Source:UniProtKB/TrEMBL%3BAcc:Q7PTA7]	D	7.41991	8.66903	7.81612	7.72419	0.909966	3.50628	1.37994	2.64911
AGAP008909		phosphatidylethanolamine binding	D	6.23151	7.73644	6.80654	7.66965	2.69514	4.94735	2.52321	0.587202
AGAP007901		Ras-related protein Rab-5C [Source:VB Community Annotation]	D	7.43836	8.01783	7.22326	7.63832	1.14278	5.15433	2.8241	4.88367
AGAP008955		ubiquinol-cytochrome c reductase iron-sulfur subunit [Source:VB Community Annotation]	D	6.91644	7.48305	7.0873	7.59231	0.833736	3.59034	1.84444	1.34697
AGAP010337		ubiquinol-cytochrome c reductase subunit 8 [Source:VB Community Annotation]	D	6.6536	7.97926	6.83562	7.55707	1.11999	3.77012	0.542636	0.596903
AGAP028369	ATP8	adenosine triphosphatase subunit 8 [Source:European Nucleotide Archive%3BAcc:ATP8]	D	6.88676	7.00706	7.23789	7.55376	12.1706	10.576	8.90012	3.08657
AGAP005775		Bax inhibitor 1 [Source:VB Community Annotation]	D	5.12241	8.62929	5.88349	7.5222	0.571322	4.51786	1.05837	3.53637
AGAP004739		H/ACA ribonucleoprotein complex subunit 4 [Source:VB Community Annotation]	D	4.02463	8.1632	3.40255	7.4561	0.286888	2.97017	2.35062	1.74998
AGAP005160		Ras homolog gene family%2C member A [Source:VB Community Annotation]	D	5.82052	8.22556	5.81043	7.35196	1.14488	3.83527	4.07691	5.47332
AGAP001928		nucleosome assembly protein 1-like 1 [Source:VB Community Annotation]	D	4.47006	7.85982	6.34467	7.31877	1.16505	3.33549	0.692241	1.42758
AGAP003767		Ecdysteroid kinase	D	5.70263	7.33816	9.08028	7.31636	1.62306	3.16841	1.6485	0.820697
AGAP010010		oligosaccharyltransferase complex subunit gamma [Source:VB Community Annotation]	D	4.09416	7.96797	4.51288	7.28018	0.305106	3.78894	0.704498	1.43815
AGAP003016		mesencephalic astrocyte-derived neurotrophic factor homolog [Source:VB Community Annotation]	D	5.39193	9.50342	4.71976	7.25556	0.398602	3.50351	2.53201	3.95809
AGAP011842		signal peptidase complex subunit 2 [Source:VB Community Annotation]	D	4.55994	8.30031	4.6939	7.11912	0.685597	3.17353	0.156432	0.723632
AGAP001874		Ras-related protein Rap-1A [Source:VB Community Annotation]	D	5.00602	8.62607	6.27935	7.10374	0.804918	4.17248	2.81358	4.89878
AGAP008491		oligosaccharyltransferase complex subunit epsilon [Source:VB Community Annotation]	D	4.78595	7.72658	5.73612	7.09486	0.84822	3.73568	0.535746	0.242898
AGAP009651		CD63 antigen [Source:VB Community Annotation]	D	6.28705	8.34438	7.84785	7.06051	0	3.55072	1.5153	4.5469
AGAP003069		signal peptidase%2C endoplasmic reticulum-type [Source:VB Community Annotation]	D	4.00248	8.28281	5.34738	7.05658	0.343895	2.55497	0.879407	0.811977
AGAP011832		Death-associated protein 1 [Source:VB Community Annotation]	D	7.16194	7.70951	6.63669	7.03275	1.40028	2.86843	1.33659	0.902465
AGAP010174		oligosaccharyltransferase complex subunit alpha (ribophorin I) [Source:VB Community Annotation]	D	4.72208	8.85894	5.1584	6.84361	0.704312	2.19681	0.698127	1.54957
AGAP004819		receptor expression-enhancing protein 5 [Source:VB Community Annotation]	D	5.15895	8.03585	5.20152	6.80301	0.878372	3.30001	1.91652	4.98619
AGAP002931	Arf2	ADP-ribosylation factor 2 [Source:VB Community Annotation]	D	6.34591	7.52461	4.30707	6.80165	0.238349	3.4099	1.07205	1.29323
AGAP002878		Cystatin-like protein [Source:VB Community Annotation]	D	5.88244	7.66542	6.57459	6.76471	0.363573	3.31247	0.925598	0
AGAP001701		Small ubiquitin-related modifier [Source:UniProtKB/TrEMBL%3BAcc:Q7PY16]	D	5.21251	7.70135	5.13393	6.75933	1.08711	3.27015	0.641475	0.553619
AGAP004026	GPRMTH6	methuselah receptor 6 [Source:VB Community Annotation]	D	5.54223	7.70851	4.26412	6.72787	1.04248	2.88438	2.11673	2.79504
AGAP000719	Ahcy13	Adenosylhomocysteinase [Source:UniProtKB/Swiss-Prot%3BAcc:O76757]	D	4.45539	6.32998	4.50089	6.63599	0.963565	2.17535	1.42821	0.896404
AGAP000415		5-hydroxyisourate hydrolase [Source:VB Community Annotation]	D	7.09168	6.59551	6.43479	6.63335	0.558379	3.86656	0.988769	0.716703
AGAP004098		GTP-binding protein SAR1 [Source:VB Community Annotation]	D	4.94034	7.22789	6.88142	6.61203	0.189091	3.21616	0.893247	1.41526
AGAP005393		Ras-related protein Rab-2A [Source:VB Community Annotation]	D	6.13295	7.51679	5.94047	6.59464	0.752852	3.0606	3.47395	3.17411
AGAP011157		cytosolic prostaglandin-E synthase [Source:VB Community Annotation]	D	5.05322	7.61368	5.80223	6.56451	0.418091	1.78878	1.20236	1.41543
AGAP009569		syntenin-1 isoform 1 [Source:VB Community Annotation]	D	5.95796	7.4418	5.76196	6.52346	0	3.2931	1.02196	1.11681
AGAP002759		T-complex protein 1 subunit gamma [Source:UniProtKB/TrEMBL%3BAcc:Q7QCQ5]	D	3.86598	7.74575	5.10728	6.51758	0.510864	2.51017	0.312022	0.314774
AGAP009505		T-complex protein 1%2C delta subunit [Source:VB Community Annotation]	D	4.53721	7.53493	4.63233	6.40519	0.53343	1.38209	0.68889	1.11688
AGAP003893		C-terminal-binding protein [Source:VB Community Annotation]	D	5.47034	6.3954	6.76865	6.39452	0.582533	2.77062	2.99208	5.05244
AGAP008527		CD63 antigen [Source:VB Community Annotation]	D	6.84872	7.70325	6.99512	6.38042	0.35657	2.01272	1.51955	1.84449
AGAP004559		Ras-related protein [Source:VB Community Annotation]	D	6.94402	8.03906	3.36165	6.33928	0.0925208	2.74951	1.98921	2.37526
AGAP011034		Odz%2C odd Oz/ten-m homolog 1 [Source:VB Community Annotation]	D	4.70086	6.4642	6.22539	6.3391	0.898141	2.66634	1.76794	3.49723
AGAP003935	Prosalpha1	26S proteasome alpha 1 subunit [Source:VB Community Annotation]	D	4.19007	6.69306	4.05186	6.33742	0.391193	3.46434	0.226474	0.613496
AGAP003553		Transmembrane emp24 protein transport domain containing 9 [Source:VB Community Annotation]	D	6.10026	7.75442	5.92755	6.33664	0	3.12105	1.40223	2.23138
AGAP012188		ubiquinol-cytochrome c reductase subunit 7 [Source:VB Community Annotation]	D	4.73799	6.54373	5.10619	6.33298	1.14436	3.58331	1.54082	1.99774
AGAP002239		Diamine acetyltransferase 1 [Source:VB Community Annotation]	D	7.17554	5.76204	6.3481	6.32884	0.851191	3.88775	1.36005	2.22448
AGAP011076		ubiquitin-conjugating enzyme E2 I [Source:VB Community Annotation]	D	7.27369	7.09568	7.12766	6.31884	0.545264	3.51876	0.32069	0.745
AGAP006216	GPRMTH2	methuselah receptor 2 [Source:VB Community Annotation]	D	5.57479	7.75942	6.38508	6.29594	0.138528	2.00468	0.678303	1.81267
AGAP003477		T-complex protein 1 subunit zeta [Source:VB Community Annotation]	D	4.62603	7.79402	4.13642	6.27646	0.270605	3.41487	0.729783	0.724447
AGAP011166		protein phosphatase 1%2C catalytic subunit [Source:VB Community Annotation]	D	6.13394	6.69812	6.02068	6.27303	0.131688	1.96316	1.17676	2.29996
AGAP009623	GAPDH	glyceraldehyde 3-phosphate dehydrogenase [Source:VB Community Annotation]	D	4.78278	7.05955	6.02063	6.23407	0.164761	1.02589	0.677913	0.209124
AGAP000145		ubiquitin-conjugating enzyme E2D [Source:VB Community Annotation]	D	4.61304	6.76033	5.00415	6.21728	0.938963	3.19441	3.00978	3.79088
AGAP001919		protein disulfide-isomerase A6 [Source:VB Community Annotation]	D	4.70789	8.25198	4.36858	6.19373	0.389207	2.93781	1.18625	0.485702
AGAP001995	Prosalpha2	26S proteasome alpha 2 subunit [Source:VB Community Annotation]	D	6.76912	6.82483	3.20308	6.16905	0.54928	1.9877	0.924397	0.792928
AGAP001730		cyclin G2 [Source:VB Community Annotation]	D	6.55458	6.54853	6.6153	6.16683	0.807134	3.85794	2.92459	4.76693
AGAP007638		oligosaccharyltransferase complex subunit delta (ribophorin II) [Source:VB Community Annotation]	D	1.71844	7.6385	5.86949	6.14619	0.41778	1.39955	0.437519	0.629006
AGAP010188		stress-induced-phosphoprotein 1 [Source:VB Community Annotation]	D	3.37372	6.73246	3.16902	6.09678	0.501248	3.93289	0.807426	1.33664
AGAP010189		Arf GTPase activating protein	D	5.90652	5.04858	5.99619	6.093	0.953531	1.87191	2.46352	3.9697
AGAP009271	Prosbeta1	26S proteasome beta 1 subunit [Source:VB Community Annotation]	D	5.13193	6.55916	4.63436	6.07372	0.532317	2.00602	1.26391	1.98467
AGAP004743		Transmembrane emp24 domain-containing protein [Source:VB Community Annotation]	D	5.28003	8.82001	5.15431	6.02341	0.233293	2.29147	1.43114	1.88396
AGAP011161		transketolase [Source:VB Community Annotation]	D	3.8998	6.75315	3.95501	6.02134	1.23429	1.92038	1.14513	0.729077
AGAP003462		protein arginine N-methyltransferase 1 [Source:VB Community Annotation]	D	2.55841	7.52074	3.39407	5.94818	0.58177	2.99314	0.932249	0.690247
AGAP005608		NUCB1	D	3.72028	7.53559	6.58668	5.9467	0.317029	1.80364	0.836467	2.04222
AGAP010588		T-complex protein 1 subunit theta [Source:VB Community Annotation]	D	3.45811	7.69259	3.33789	5.94621	0.867124	1.30847	0.372998	0.745263
AGAP004296		signal peptidase complex subunit 1 [Source:VB Community Annotation]	D	3.49998	6.96602	4.68701	5.92023	0.548039	3.61791	0.347766	0
AGAP012204		H/ACA ribonucleoprotein complex subunit 2 [Source:VB Community Annotation]	D	4.13241	5.85244	1.52873	5.89315	0.423458	1.99334	0.4814	1.97305
AGAP000832		Derlin-2/3 [Source:VB Community Annotation]	D	5.46856	8.43135	3.29806	5.89134	0.28767	2.35247	1.71347	3.58516
AGAP010172		protein phosphatase 2 (formerly 2A)%2C catalytic subunit [Source:VB Community Annotation]	D	5.92346	7.32766	6.28171	5.88489	0.823533	2.59515	2.42089	6.36108
AGAP002440	Cdc42	cell division cycle Cdc42 homolog [Source:VB Community Annotation]	D	4.91822	6.71841	6.70852	5.87536	0.814245	2.91186	1.49671	2.6981
AGAP001971		Polyubiquitin-C [Source:VB Community Annotation]	D	4.55008	6.48902	5.65319	5.80599	0.496108	3.48902	0.590778	0.11994
AGAP001721		translocon-associated protein subunit alpha [Source:VB Community Annotation]	D	4.08369	7.22627	3.2524	5.80261	0.339984	2.34972	0.68909	0.196153
AGAP009694		T-complex protein 1 subunit beta [Source:VB Community Annotation]	D	3.77959	6.62362	2.88995	5.75746	1.02283	1.61107	0.72346	1.64713
AGAP001256		3'-phosphoadenosine 5'-phosphosulfate synthase [Source:VB Community Annotation]	D	4.8184	7.49448	6.72702	5.72531	0.0815827	2.71117	0.99347	1.12263
AGAP010755		protein mago nashi [Source:VB Community Annotation]	D	3.77775	6.73831	3.48177	5.71476	0.599552	1.43765	0.201683	0.288975
AGAP006108		Y-box protein	D	4.34952	6.73496	3.78482	5.70104	0.570642	3.11861	1.18618	0.643732
AGAP010445		Rab11 family-interacting protein 3/4 [Source:VB Community Annotation]	D	6.66241	7.1846	6.29157	5.68953	1.32639	3.44291	1.82714	2.92113
AGAP005202		RING-box protein 1 [Source:VB Community Annotation]	D	4.56717	6.31207	4.8321	5.6772	0.179379	2.77258	1.58004	0.206599
AGAP000005		high mobility group protein B1 [Source:VB Community Annotation]	D	4.15671	7.3725	5.25441	5.66489	0.385881	2.71388	2.18284	4.97822
AGAP002762		T-complex protein 1 subunit eta [Source:VB Community Annotation]	D	2.72807	7.30686	4.08597	5.62647	0.569223	2.4064	0.429579	0.482504
AGAP006383		oligosaccharyltransferase complex subunit beta [Source:VB Community Annotation]	D	3.28803	5.77917	3.07973	5.61394	0.0957975	1.14037	0.947751	1.57011
AGAP001617		Ras-related protein Rab-7A [Source:VB Community Annotation]	D	5.51745	6.97134	6.34622	5.60358	0.147533	2.08174	3.16088	4.21617
AGAP011438		Casein kinase II subunit beta [Source:UniProtKB/TrEMBL%3BAcc:A0NFB7]	D	4.11716	6.52548	3.69739	5.58697	0.375213	0.805354	0.647099	1.79523
AGAP009288		Derlin-1 [Source:VB Community Annotation]	D	2.58793	5.73231	4.83705	5.56993	0	2.42205	0.257358	0.626414
AGAP009156		BRICHOS domain	D	6.69998	5.70723	6.34018	5.56462	0.0755069	3.88592	3.06038	3.04697
AGAP005630		transitional endoplasmic reticulum ATPase [Source:VB Community Annotation]	D	4.57085	7.06818	3.7508	5.5386	0.553099	1.82899	0.776534	0.667139
AGAP003968		UMP-CMP kinase [Source:UniProtKB/TrEMBL%3BAcc:Q7Q292]	D	4.46097	7.93793	2.9246	5.53228	0.591028	2.10096	0.782945	1.4119
AGAP000308		proteasome activator subunit 3 (PA28 gamma) [Source:VB Community Annotation]	D	2.93406	6.60345	4.30956	5.51539	0.0765191	2.78758	0.470537	0.767724
AGAP000044		thioredoxin domain-containing protein [Source:VB Community Annotation]	D	5.04724	6.12522	4.89854	5.50625	0.278335	3.79518	0.730329	0.70619
AGAP005618		1%2C2-dihydroxy-3-keto-5-methylthiopentene dioxygenase [Source:UniProtKB/TrEMBL%3BAcc:Q7Q6X6]	D	4.56058	5.55632	5.56025	5.48128	0.463836	2.11837	0.786646	0.750419
AGAP006937		ubiquitin-conjugating enzyme E2 variant [Source:VB Community Annotation]	D	4.6672	6.26178	5.2246	5.451	0.611111	2.21168	2.59162	2.3293
AGAP006099		ubiquinol-cytochrome c reductase core subunit 2 [Source:VB Community Annotation]	D	4.20163	6.80273	3.85317	5.4441	0.263672	2.20753	0.711814	0.762969
AGAP004484		CDGSH iron sulfur domain-containing protein 2 homolog [Source:VB Community Annotation]	D	4.45166	7.33699	3.56071	5.43014	0.197903	2.90284	0.791233	0.20061
AGAP005576		aspartyl-tRNA synthetase [Source:VB Community Annotation]	D	3.60373	6.97873	3.17167	5.39718	0.245955	1.74704	1.44598	0.754934
AGAP010623		X box-binding protein 1 [Source:VB Community Annotation]	D	5.91782	7.35764	5.06096	5.39137	0.192033	2.99965	0.181929	0.724515
AGAP008617		26S proteasome regulatory subunit N11 [Source:VB Community Annotation]	D	4.87034	6.57054	2.05102	5.36714	0.242341	2.11858	0.231483	1.1519
AGAP000498		nuclear transport factor 2 [Source:VB Community Annotation]	D	5.45532	6.38827	4.32202	5.34234	0.630676	2.41685	1.44343	2.33133
AGAP005432		programmed cell death protein 5 [Source:VB Community Annotation]	D	3.9927	6.33593	4.21775	5.32996	0.211177	1.90699	0.245938	1.29527
AGAP011165		prefoldin [Source:VB Community Annotation]	D	2.84731	5.73698	3.29828	5.27706	0.220267	2.68791	0.23512	0.472341
AGAP005528		Bax inhibitor 1-related	D	6.84036	7.48508	6.55366	5.25584	0	1.28991	1.26355	1.89381
AGAP011797		Wbp2 ortholog	D	4.14974	6.48402	4.56191	5.25274	0.704022	1.98692	0.626589	1.12456
AGAP007913		ubiquitin-like protein Nedd8 [Source:VB Community Annotation]	D	4.1786	5.59107	4.03862	5.25141	1.16425	3.51771	1.24139	2.37378
AGAP004002		60 kDa heat shock protein%2C mitochondrial precursor [Source:VB Community Annotation]	D	3.64782	6.21006	3.16596	5.24701	0.736355	1.96344	0.603051	0.450233
AGAP010557		B-cell receptor-associated protein 31 [Source:VB Community Annotation]	D	3.38495	6.60239	4.77616	5.23187	0	1.61363	0	0.493669
AGAP005445		Ras-related C3 botulinum toxin substrate [Source:VB Community Annotation]	D	4.6828	5.99731	4.80532	5.22282	0.602455	1.25502	0.694702	2.34314
AGAP004991		20S proteasome subunit beta 6 [Source:VB Community Annotation]	D	4.92124	6.30153	3.00234	5.19687	0.504819	2.14469	1.10799	0.505551
AGAP002415		Rho GTPase activation protein	D	3.02561	5.61669	3.8947	5.18513	0.168996	1.58537	0.537745	0
AGAP009647		proteasome maturation protein [Source:VB Community Annotation]	D	3.73894	5.41122	2.54762	5.16437	0.868171	2.71305	0.652504	1.69679
AGAP000528		Basic-leucine zipper domain	D	3.71436	5.89334	4.86205	5.08702	0.794209	3.61794	1.02441	1.85739
AGAP001440		Proteasome 26S non-ATPase subunit 11 [Source:VB Community Annotation]	D	3.27906	6.919	4.06812	5.08688	0.607727	2.40951	0.593427	0.995871
AGAP009202		selenoprotein T [Source:VB Community Annotation]	D	5.48104	5.79491	2.88269	5.07555	0.232614	1.67326	0.650681	2.68151
AGAP008761		translocon-associated protein subunit gamma [Source:VB Community Annotation]	D	4.33337	6.61753	2.49224	5.07317	0.139156	2.76173	1.09148	0.428728
AGAP008816	Prosalpha5	26S proteasome alpha 5 subunit [Source:VB Community Annotation]	D	3.15172	6.23578	2.68236	5.06816	0.118433	1.3167	1.50044	0.519059
AGAP010025		Rab GDP dissociation inhibitor beta [Source:VB Community Annotation]	D	4.52139	5.30638	4.38984	5.06117	0.493861	1.19595	1.64421	2.53086
AGAP000321		Nucleoside phosphorylase	D	3.89708	6.16393	4.09898	5.04148	0.232235	3.71933	1.39177	2.12478
AGAP005602		zinc finger protein 706 [Source:VB Community Annotation]	D	3.91038	5.20641	4.539	5.02991	0.28002	2.82017	0.798569	0.332188
AGAP010175		adenylyl cyclase-associated protein 1 [Source:VB Community Annotation]	D	3.43546	6.85401	3.20603	5.01894	0.564312	1.46484	0.857453	1.54362
AGAP011334		Failed axon connections protein [Source:VB Community Annotation]	D	6.68562	5.04615	6.35433	5.00977	0.694224	2.56773	3.9225	4.93059
AGAP001697		20S proteasome subunit beta 3 [Source:VB Community Annotation]	D	3.81511	5.68394	2.72932	5.00728	0	2.35986	0.715248	0.762874
AGAP009621		alpha-N-acetylgalactosaminidase [Source:VB Community Annotation]	D	6.00492	5.89656	7.41377	5.00227	0	1.10011	0.798862	1.58861
AGAP006478		Synaptic vesicle membrane protein VAT-1 homolog-like [Source:VB Community Annotation]	D	5.02956	4.61007	5.10397	4.98267	0.797567	2.56723	1.46738	2.74167
AGAP006733	Thoc4	THO complex subunit 4 [Source:VB Community Annotation]	D	3.75224	6.87615	5.43093	4.96117	0.316457	3.037	1.2138	2.01184
AGAP010718		20S proteasome subunit beta 5 [Source:VB Community Annotation]	D	5.119	5.78251	2.84342	4.9155	0.524647	2.16199	0.922595	1.87038
AGAP000167		Lipid storage droplets surface-binding protein 2 [Source:VB Community Annotation]	D	4.72038	5.12245	7.22536	4.8942	0.497052	2.28712	1.81285	1.08665
AGAP004443		glycogen synthase kinase 3 beta [Source:VB Community Annotation]	D	3.1272	5.38151	3.57946	4.86376	1.0804	2.57976	2.60045	3.61965
AGAP009642		prohibitin 2 [Source:VB Community Annotation]	D	3.08206	5.77376	2.59731	4.86113	0.560145	1.51377	0.472394	3.06205
AGAP001749		Stromal cell-derived factor 2 [Source:VB Community Annotation]	D	4.98783	7.20393	2.9841	4.8534	0.285534	1.05262	0.780661	0.997094
AGAP005197		ubiquitin-conjugating enzyme E2 N [Source:VB Community Annotation]	D	5.30518	6.85124	5.05088	4.84211	0.104886	1.93897	0.835758	2.89602
AGAP001312		succinyl-CoA synthetase alpha subunit [Source:VB Community Annotation]	D	3.62908	6.63657	4.03373	4.82981	1.08103	2.8309	1.13016	2.92639
AGAP009119		suppressor of tumorigenicity protein 13 [Source:VB Community Annotation]	D	2.82047	5.25926	2.31347	4.8265	0.464094	1.05672	0.41445	0
AGAP001973	Prosalpha7	26S proteasome alpha 7 subunit [Source:VB Community Annotation]	D	4.20434	4.63184	2.10117	4.82472	0.314555	1.33963	0.541044	0.73469
AGAP012103		Insulin-like growth factor 2 mRNA-binding protein 2 [Source:VB Community Annotation]	D	4.98817	5.44006	5.41651	4.81156	0.646002	2.57415	1.21759	1.51604
AGAP007024		nuclear transport factor 2 [Source:VB Community Annotation]	D	4.38913	6.5371	3.42371	4.78235	0.186475	2.70671	0.341197	0.686657
AGAP006890	Arf3	ADP-ribosylation factor 3 [Source:VB Community Annotation]	D	4.53612	5.02146	5.27958	4.76769	0.137861	1.58728	2.27011	5.94692
AGAP008837		20S proteasome subunit beta 4 [Source:VB Community Annotation]	D	3.59372	6.39843	3.00667	4.74346	0.832745	2.09317	0.202652	0.580739
AGAP007050		Nucleolar GTP-binding protein 1 [Source:UniProtKB/TrEMBL%3BAcc:Q7QIT0]	D	4.08092	4.581	4.92064	4.73723	0.44309	2.25627	0.485126	1.08944
AGAP005404		lectin%2C mannose-binding 1 [Source:VB Community Annotation]	D	4.00186	5.9915	3.44266	4.73406	0	0.831881	0.731561	2.33908
AGAP004960	Prosalpha3	26S proteasome alpha 3 subunit [Source:VB Community Annotation]	D	1.65081	5.64648	3.56302	4.73257	0.0790254	1.92334	0.746004	2.44843
AGAP004238		T-complex protein 1 subunit alpha [Source:VB Community Annotation]	D	4.08657	6.39667	2.03348	4.72321	0.455023	1.34152	1.03078	2.24216
AGAP002922		Secretory carrier-associated membrane protein [Source:UniProtKB/TrEMBL%3BAcc:Q7QD28]	D	4.19057	5.01589	3.37066	4.72256	0.186537	0.842363	0.813526	1.72405
AGAP012648		Sulfotransferase	D	3.84365	5.25988	2.54272	4.6803	0	1.32037	0.599042	0.225512
AGAP005569		casein kinase II subunit alpha [Source:VB Community Annotation]	D	2.67015	4.9066	3.09414	4.66268	0.277805	0.574268	0.66195	0.437263
AGAP004256		Zinc finger, LIM-type	D	4.78388	5.74676	3.80457	4.6186	0.412049	3.25076	2.24008	4.30024
AGAP008265		seryl-tRNA synthetase [Source:VB Community Annotation]	D	2.81866	6.9795	2.61495	4.60487	0.44712	1.82584	0.731152	0.508578
AGAP000808		DNA damage-regulated autophagy modulator protein 2 [Source:VB Community Annotation]	D	2.75684	7.26172	2.64618	4.59637	0.481466	2.48231	0.956831	0.759896
AGAP002107		calcyclin binding protein [Source:VB Community Annotation]	D	1.42262	5.89608	3.69495	4.55941	0.331899	2.02473	0.0876084	0.998092
AGAP004294	Ubqn	ubiquilin [Source:VB Community Annotation]	D	2.83894	4.91042	3.20974	4.54599	0.138654	2.7568	0.844326	1.31078
AGAP000901		alanine transaminase [Source:VB Community Annotation]	D	3.53646	5.04442	3.92937	4.52589	0.494659	1.28216	1.45001	1.80972
AGAP007827	Eno	enolase [Source:VB Community Annotation]	D	2.97737	5.70052	2.1887	4.52357	0.881697	3.10503	1.28537	1.54319
AGAP003649		Znf216-like, NF-kB inhibitor	D	4.64269	4.85403	4.56932	4.5148	0.827792	1.99422	2.51592	3.79769
AGAP012135		26S proteasome regulatory subunit N8 [Source:VB Community Annotation]	D	2.73403	5.12373	1.85119	4.50354	0.573526	1.04051	0.111559	0
AGAP001136		tetratricopeptide repeat protein 35 [Source:VB Community Annotation]	D	2.84472	3.92971	1.79578	4.49127	0.498025	0.450003	0.819939	0.455326
AGAP004486		adiponectin receptor [Source:VB Community Annotation]	D	4.8365	5.01146	3.92282	4.48891	2.08092	2.09169	2.31001	5.04032
AGAP005423	Prosalpha4	26S proteasome alpha 4 subunit [Source:VB Community Annotation]	D	2.46633	6.95331	3.64004	4.45622	0.531028	2.39045	0.730384	0.809919
AGAP001761		ceramide synthetase [Source:VB Community Annotation]	D	3.79801	6.62948	3.1839	4.44632	0.627583	2.04849	0.684131	2.84244
AGAP028038		Tetratricopeptide repeat domain	D	5.67381	4.12369	5.99046	4.4307	0	1.18852	0.387492	0
AGAP000672		Obg-like ATPase 1 [Source:UniProtKB/TrEMBL%3BAcc:Q7QEG0]	D	2.22978	6.17977	2.67049	4.40205	0.962312	1.08078	1.92577	3.24792
AGAP009323		prohibitin 1 [Source:VB Community Annotation]	D	2.74528	4.66172	1.8611	4.39926	0.363079	1.11164	0.178363	0.572913
AGAP003416		prefoldin alpha subunit [Source:VB Community Annotation]	D	2.70401	4.40903	2.81855	4.39047	0.229822	1.38411	0.477263	0.892172
AGAP006243		phosphatidylinositol-4%2C5-bisphosphate 4-phosphatase [Source:VB Community Annotation]	D	4.71424	6.55842	6.75928	4.38933	0.0609952	2.10705	0.70862	1.45445
AGAP012168		Rho GDP-dissociation inhibitor [Source:VB Community Annotation]	D	3.34175	5.44649	3.03735	4.35567	0.2122	1.23984	1.16943	1.5225
AGAP003549		Tango 9	D	6.01526	6.30041	5.76071	4.35166	0.319759	1.43021	2.69161	2.65522
AGAP000900		protein-tyrosine sulfotransferase [Source:VB Community Annotation]	D	3.58547	4.45859	4.93209	4.33553	0.970379	1.90768	1.36864	2.84042
AGAP004625		cortactin [Source:VB Community Annotation]	D	3.77787	5.42284	3.40476	4.30682	0.352657	1.44597	1.63951	3.62005
AGAP002569		serine incorporator 1 [Source:VB Community Annotation]	D	3.96571	5.435	4.75368	4.30024	0	1.64321	0.50093	1.74588
AGAP003759		juvenile hormone-inducible protein [Source:VB Community Annotation]	D	5.20309	5.37327	4.29747	4.29874	0.588457	1.48662	1.29836	3.81342
AGAP008952		lupus La protein [Source:VB Community Annotation]	D	3.34988	4.85023	2.57363	4.2785	0.111436	2.42486	0.224919	0.368642
AGAP006688		signal recognition particle receptor subunit beta [Source:VB Community Annotation]	D	2.94506	6.79418	1.84069	4.27141	0	1.16711	0.355999	0
AGAP010253	Prosalpha6	26S proteasome alpha 6 subunit [Source:VB Community Annotation]	D	2.57405	5.99173	3.06179	4.26458	0.0776905	1.73273	0.862857	0.364904
AGAP006907		Cat eye syndrome chromosome region%2C candidate 1a [Source:VB Community Annotation]	D	4.01858	4.72302	4.28618	4.26014	0	0.851236	1.89798	2.50529
AGAP005149		H/ACA ribonucleoprotein complex subunit 3 [Source:VB Community Annotation]	D	2.43403	4.14282	1.65431	4.23297	0.618435	2.77911	0.503782	0.959306
AGAP011733		Unknown	D	0.930578	4.92174	3.32858	4.21386	0.616267	1.59253	0.318954	0.853459
AGAP001267		Adaptor-related protein complex 2%2C beta 1 subunit [Source:VB Community Annotation]	D	4.4281	6.69937	4.49639	4.21144	0.732089	1.55502	1.20444	1.88999
AGAP006070		prefoldin 2 [Source:VB Community Annotation]	D	3.1186	6.51332	3.10518	4.20523	0.383964	1.80695	0.539204	1.59066
AGAP007852		aconitate hydratase 1 / homoaconitase [Source:VB Community Annotation]	D	3.12443	4.5684	2.8716	4.19749	0.257557	1.46984	0.454395	2.51613
AGAP012177		Aveugle [Source:VB Community Annotation]	D	3.62736	4.97425	3.32215	4.174	0	0.567309	0.169183	0
AGAP007259		TMEM9 protein [Source:VB Community Annotation]	D	4.21975	5.99997	4.57248	4.13998	0.119719	1.57911	0.795489	2.4807
AGAP003398		nucleosome-remodeling factor 38 kDa subunit [Source:VB Community Annotation]	D	3.00883	5.36914	1.51268	4.13798	0.426368	1.81227	2.19119	4.33894
AGAP002606		26S proteasome regulatory subunit N12 [Source:VB Community Annotation]	D	3.34472	4.86215	2.93735	4.13579	0.0784778	0.704211	0.519133	0.855769
AGAP006946		Prefoldin subunit 4 [Source:UniProtKB/TrEMBL%3BAcc:Q7QIM0]	D	1.51155	4.35879	1.9069	4.13272	0.105078	1.13654	0.353929	0
AGAP004492		upstream activation factor subunit UAF30 [Source:VB Community Annotation]	D	3.50905	5.47894	1.53569	4.12553	0.626363	1.27239	1.59382	2.18902
AGAP000457		protein-L-isoaspartate(D-aspartate) O-methyltransferase [Source:VB Community Annotation]	D	2.20385	3.87501	2.81061	4.10786	0.512566	0.390238	0.58088	0.872121
AGAP001148		SH3 domain	D	5.89506	5.7473	5.45097	4.0902	1.32545	1.99518	1.43907	2.5381
AGAP002171		nucleolar protein 58 [Source:VB Community Annotation]	D	3.57662	5.99893	2.333	4.08626	0.580049	1.85596	2.28859	2.7427
AGAP001827		hypoxia up-regulated 1 [Source:VB Community Annotation]	D	4.47361	6.59046	3.27762	4.07241	0.408842	1.40782	0.880385	2.12131
AGAP002352		p53	D	4.5483	5.45651	3.2198	4.06699	0.735931	1.77318	2.43992	4.67015
AGAP004428		Midline fasciclin [Source:VB Community Annotation]	D	4.23833	4.23516	6.25811	4.06118	0.232565	1.50009	1.61076	2.43297
AGAP004205		N-sulfoglucosamine sulfohydrolase [Source:VB Community Annotation]	D	3.29822	5.09685	3.00875	4.05653	0.204299	0.898125	1.11732	2.71557
AGAP007362		SH3 domain-binding glutamic acid-rich-like protein 3 [Source:VB Community Annotation]	D	2.97524	6.02676	2.6433	4.05031	0.293206	2.45819	1.15194	4.39963
AGAP009105		Serine/threonine-protein phosphatase 2A 65 kDa regulatory subunit A beta isoform isoform c [Source:VB Community Annotation]	D	4.81668	5.96481	4.28446	4.04488	0.310826	1.03672	0.650141	1.51545
AGAP003857		ubiquitin-conjugating enzyme E2 A [Source:VB Community Annotation]	D	3.94785	5.30245	3.91236	4.03544	0.69756	1.82413	2.59423	3.20236
AGAP002568		Nat13 protein [Source:VB Community Annotation]	D	1.69271	5.08476	1.30775	4.01745	0.381096	0.976845	0	0.425894
AGAP003008		26S proteasome regulatory subunit T3 [Source:VB Community Annotation]	D	2.68723	5.8681	2.08567	3.99609	0.584666	1.0887	0.805142	0.226543
AGAP011423		20S proteasome subunit beta 2 [Source:VB Community Annotation]	D	3.76039	4.87661	1.76409	3.99543	0.07732	1.07922	0.319208	0.66752
AGAP003851		26 proteasome complex subunit DSS1 [Source:VB Community Annotation]	D	1.38783	4.02817	2.72855	3.99517	0.789086	2.28139	0.556523	0.416869
AGAP012235		prefoldin 6 [Source:VB Community Annotation]	D	2.88501	4.96266	3.39044	3.99375	0.15751	2.19349	0.240145	0.317714
AGAP003914		Unknown	D	4.39853	4.27339	4.55676	3.98576	0.508403	3.01373	3.1351	4.44095
AGAP000705		protein DJ-1 [Source:VB Community Annotation]	D	3.51612	4.73169	2.89514	3.97568	0.237621	1.54046	0.345584	0.455728
AGAP010548		Laminin B type IV	D	4.42563	4.37637	1.88524	3.97006	0.0725749	1.11954	0.378076	2.68915
AGAP010386		Translocating chain-associated membrane protein 2 [Source:VB Community Annotation]	D	3.94413	6.72981	3.82221	3.95533	0	2.21366	1.99218	1.84974
AGAP007112		Pescadillo homolog [Source:UniProtKB/Swiss-Prot%3BAcc:Q7QIX1]	D	1.43995	4.68123	1.65199	3.91652	0.119797	1.27688	0.178846	0.655427
AGAP011444		20S proteasome subunit beta 7 [Source:VB Community Annotation]	D	1.83041	4.81827	2.67927	3.89721	0	0.886262	0.478379	0
AGAP005672		staphylococcal nuclease domain-containing protein 1 [Source:VB Community Annotation]	D	2.90414	5.41827	3.23436	3.88831	0.0764171	1.44335	1.3035	1.81953
AGAP003220		CHK kinase-like	D	1.74633	4.84538	3.31408	3.87176	0.0536582	0.553674	0.0893986	0.313136
AGAP001364		Ubiquitin-fold modifier 1 [Source:UniProtKB/Swiss-Prot%3BAcc:Q7PXE2]	D	0.908975	4.65386	2.35642	3.8702	0.287621	1.17855	0.87867	0.276509
AGAP010477		phosducin-like 3 [Source:VB Community Annotation]	D	1.90108	4.34936	2.83978	3.85544	0.0777216	0.939077	0.709584	2.34269
AGAP010476		alpha-endosulfine [Source:VB Community Annotation]	D	2.8138	3.59119	3.15454	3.85257	0.160262	1.1261	0.71638	3.12115
AGAP007000		Asterix family	D	2.67979	5.9082	3.59586	3.84033	0.221852	1.61106	0.520553	0.506543
AGAP007243		26S protease regulatory subunit 8 [Source:VB Community Annotation]	D	2.93492	5.7994	3.10094	3.83186	0.579178	0.961887	0	0
AGAP007864		F-actin capping protein subunit beta [Source:VB Community Annotation]	D	3.14961	6.76352	2.13976	3.81847	0.536122	0.699235	0.996504	0.936228
AGAP002061		26S proteasome regulatory subunit N7 [Source:VB Community Annotation]	D	2.60221	5.8773	5.52453	3.81353	0	1.45135	0.0868522	0.25636
AGAP000616		26S proteasome regulatory subunit T5 [Source:VB Community Annotation]	D	3.44947	5.82363	1.57612	3.81337	0.671002	2.35954	0.570929	0.413857
AGAP011140		Protein canopy homolog 3 [Source:VB Community Annotation]	D	3.4117	5.99683	2.37544	3.81328	0	0.768637	0.978784	1.39452
AGAP011521		28 kDa heat-and acid-stable phosphoprotein [Source:VB Community Annotation]	D	2.37394	5.48024	1.80385	3.81215	0	1.11241	0.616144	0.880944
AGAP010553		poly(U)-binding-splicing factor PUF60 [Source:VB Community Annotation]	D	3.50176	6.31323	5.99616	3.76528	0.702941	2.06647	0.9067	3.56467
AGAP005535		26S proteasome regulatory subunit N5 [Source:VB Community Annotation]	D	2.07336	5.05428	2.42294	3.76259	0.261708	1.64231	0.349022	0.739542
AGAP012813		Unknown	D	2.09176	3.57505	4.67915	3.75437	0	0.594947	0	0
AGAP005891		coronin homolog [Source:VB Community Annotation]	D	3.56926	6.44098	2.29262	3.75391	0.486373	1.0888	1.7002	3.96056
AGAP005529		Transmembrane BAX inhibitor motif-containing protein 4 [Source:VB Community Annotation]	D	2.36374	4.83194	2.9268	3.75016	0.23972	0.637621	1.73892	2.17973
AGAP010214		Kruppel homolog 2	D	6.19388	5.28384	3.14378	3.72249	0.543756	1.36805	0.750579	1.2712
AGAP000064	plexA	plexin A [Source:VB Community Annotation]	D	4.45112	3.76974	3.85763	3.71914	0.356387	1.19707	2.35482	2.37202
AGAP000954		phosphoribosyl pyrophosphate synthetase-associated protein 2 [Source:VB Community Annotation]	D	3.84046	3.46782	3.99482	3.71417	0.873272	1.90968	1.70229	2.45472
AGAP009494		ETS-type family%2C other [Source:VB Community Annotation]	D	1.14292	3.65273	2.90147	3.71387	0.33075	0.829974	0.683537	1.85969
AGAP000975		Angiotensin II, type I receptor-associated	D	3.18326	4.92726	5.37862	3.65691	0	1.54874	0.229779	1.13109
AGAP002251		ubiquitin-conjugating enzyme E2 G1 [Source:VB Community Annotation]	D	2.25844	4.40568	1.14947	3.64301	0.591778	1.46555	1.79963	2.27447
AGAP007722	Adk2	adenylate kinase 2%2C mitochondrial [Source:VB Community Annotation]	D	5.21248	5.96925	2.23304	3.64158	0.585342	1.39732	0.629135	4.4898
AGAP000941		Molecular chaperone (small heat shock protein) [Posttranslational modification	D	2.23614	4.67804	3.22104	3.64036	0.626693	2.32213	1.28572	2.9815
AGAP003598		template-activating factor I [Source:VB Community Annotation]	D	2.10763	3.04007	0.616607	3.63605	0.32547	0.61552	0.939358	1.39531
AGAP000470		methylthioribulose-1-phosphate dehydratase [Source:VB Community Annotation]	D	3.56392	4.85079	3.82428	3.63138	0.452612	1.57285	1.20497	2.485
AGAP012185		erythrocyte membrane protein band 4.1 [Source:VB Community Annotation]	D	4.76224	4.70835	3.37285	3.62795	0.64843	2.29593	1.41666	2.74647
AGAP004852		Adducin [Source:VB Community Annotation]	D	6.24468	4.77341	3.68386	3.62456	0.857743	1.62485	3.56112	5.11253
AGAP006895		signal recognition particle subunit SRP19 [Source:VB Community Annotation]	D	2.67729	5.18578	2.54104	3.61627	0	1.10684	0.265562	0
AGAP008929		threonyl-tRNA synthetase [Source:VB Community Annotation]	D	2.90245	5.59492	3.23674	3.61267	0.659727	2.04549	0.73174	1.20857
AGAP006353		Histidine triad nucleotide binding protein 1 [Source:VB Community Annotation]	D	2.17795	4.55768	3.04532	3.61012	0	1.25026	1.37724	0.397797
AGAP001399		Coatomer subunit beta [Source:UniProtKB/TrEMBL%3BAcc:Q7PXG9]	D	1.57175	4.56674	1.43712	3.60771	0.0425149	1.17093	0.500283	0.351664
AGAP000780		Yippee-like 5 [Source:VB Community Annotation]	D	2.9517	2.95247	2.23838	3.60658	0.838766	1.32981	1.83174	1.32753
AGAP009522		fibronectin type-III domain-containing protein 3a [Source:VB Community Annotation]	D	3.85195	4.79707	4.27988	3.60434	0.531439	1.67133	1.90566	2.18707
AGAP008753		Barrier-to-autointegration factor B [Source:VB Community Annotation]	D	3.17776	5.08753	3.08827	3.56915	0	0.960822	2.12608	0.605303
AGAP010308		nucleolar complex protein 3 [Source:VB Community Annotation]	D	1.61986	2.39385	0.530295	3.56028	0.595596	0.553481	0.737149	2.36373
AGAP010552		mimitin%2C mitochondrial [Source:VB Community Annotation]	D	4.22993	5.65416	3.86163	3.55731	0.243523	3.26499	0.677047	3.72405
AGAP009059		Glia maturation factor beta [Source:VB Community Annotation]	D	4.15322	5.83379	2.85046	3.55279	0.298111	1.26233	0.140413	0.658019
AGAP001056		ubiquitin-conjugating enzyme E2 L3 [Source:VB Community Annotation]	D	3.44114	3.82462	2.78664	3.54698	0.452574	2.90084	0.617888	1.4287
AGAP011105		guanylate kinase [Source:VB Community Annotation]	D	1.04007	3.3646	1.17804	3.53509	0.280819	0.711676	1.3358	2.12356
AGAP009264		ethanolamine-phosphate cytidylyltransferase [Source:VB Community Annotation]	D	4.60573	4.79238	3.99511	3.52644	0.422083	1.38689	1.41084	3.96714
AGAP005913		guanine nucleotide-binding protein G(I)/G(S)/G(T) subunit beta-1 [Source:VB Community Annotation]	D	3.09174	4.83399	3.98934	3.51487	0.152085	1.89894	0.503408	1.46036
AGAP004514		nuclear GTP-binding protein [Source:VB Community Annotation]	D	1.92851	4.61256	1.27925	3.50648	0.187351	1.47701	0.628161	1.5484
AGAP002653		phenylalanyl-tRNA synthetase alpha chain [Source:VB Community Annotation]	D	2.97584	5.08729	1.69246	3.50001	0.237883	2.1591	0	0.293223
AGAP000180		phosphoribosylaminoimidazole carboxylase [Source:VB Community Annotation]	D	3.20398	3.68327	2.33357	3.48821	0.313185	1.76336	1.19828	0.741083
AGAP004990	mbf1	multiprotein bridging factor 1 [Source:VB Community Annotation]	D	2.71113	5.93522	1.8413	3.48524	0.771646	1.1502	1.15147	0.720866
AGAP005375		nonsense-mediated mRNA decay protein [Source:VB Community Annotation]	D	2.01312	3.54184	2.09799	3.47876	0	1.80081	0.62859	0.745229
AGAP004801		Huntingtin interacting protein [Source:VB Community Annotation]	D	3.39682	3.83873	2.70071	3.47387	0.638062	2.44278	2.07035	3.53976
AGAP008693		Leptin receptor overlapping transcript-like 1 [Source:VB Community Annotation]	D	1.37892	5.36992	3.38581	3.47331	0	0.827399	0.611588	1.45248
AGAP010212		prefoldin subunit 1 [Source:VB Community Annotation]	D	3.70587	4.55333	2.22578	3.46212	0.349758	1.88156	0.691222	1.15453
AGAP002185		developmentally-regulated GTP-binding protein 2 [Source:VB Community Annotation]	D	2.30076	4.32698	1.95626	3.42731	0	1.98352	0.364063	0.403049
AGAP004151		protein phosphatase 5 [Source:VB Community Annotation]	D	2.47653	5.69239	2.29156	3.42248	0.327594	1.26667	0.611025	0.85096
AGAP004596	PyK	pyruvate kinase [Source:VB Community Annotation]	D	3.23551	5.34146	5.5181	3.4173	0.7864	1.75488	1.58009	3.22184
AGAP005117		polyadenylate-binding protein 2 [Source:VB Community Annotation]	D	2.75394	6.24763	1.59489	3.4161	0.502782	1.19287	1.88574	2.84813
AGAP006462		ADP-ribosylation factor GTPase-activating protein 1 [Source:VB Community Annotation]	D	2.27005	4.235	2.89114	3.41543	0.671874	1.20239	0.639642	1.62561
AGAP004606		HYPK [Source:VB Community Annotation]	D	2.62214	4.41464	2.27212	3.41492	0.137759	0.898487	0.423981	1.60684
AGAP010893		oxysterol-binding protein 1 [Source:VB Community Annotation]	D	4.67825	3.98834	2.12192	3.40723	0.840171	1.14655	2.13595	4.30185
AGAP008974		protein cornichon homolog [Source:VB Community Annotation]	D	3.0384	4.59987	2.61972	3.3998	0	1.08595	1.08741	3.98519
AGAP004609		protein kinase C substrate 80K-H [Source:VB Community Annotation]	D	3.66178	5.15666	1.7891	3.39245	0	1.37001	2.00319	3.30799
AGAP000733		UV excision repair protein RAD23 [Source:VB Community Annotation]	D	0.958518	4.79055	1.67745	3.35272	0.530924	1.23658	0.662639	1.21411
AGAP004407		lectin%2C mannose-binding 2 [Source:VB Community Annotation]	D	3.7609	5.67382	2.79041	3.33314	0	0.727437	0.612791	1.24041
AGAP006367		no poles/Zinc finger, RING-type	D	2.50478	7.29689	2.5247	3.33158	0.796764	2.15476	1.05678	1.84234
AGAP011133		Inosine-5'-monophosphate dehydrogenase [Source:VB Community Annotation]	D	1.67464	5.08917	0.913749	3.32631	0.723066	0.68908	1.45673	1.70205
AGAP003476		protein BCP1 [Source:VB Community Annotation]	D	2.32687	4.79064	1.00644	3.3186	0.250048	0.502881	0.874372	0.256239
AGAP008419		Ras-related protein Rab-14 [Source:VB Community Annotation]	D	4.54253	4.33323	4.12008	3.31465	0.175408	0.608452	2.45077	2.78823
AGAP009265		ectonucleoside triphosphate diphosphohydrolase 5/6 [Source:VB Community Annotation]	D	4.0422	5.00878	2.49182	3.3085	0.610229	2.1584	0.952299	2.24434
AGAP012647		sulfotransferase [Source:VB Community Annotation]	D	2.61841	3.59741	1.36358	3.30365	0	0.714004	0.694951	0.771793
AGAP000969		tropomodulin [Source:VB Community Annotation]	D	4.14678	4.53647	3.36372	3.30332	0.343736	1.93604	2.11007	4.52516
AGAP001043	arm	Armadillo segment polarity protein [Source:UniProtKB/Swiss-Prot%3BAcc:Q7QHW5]	D	4.00578	4.20446	3.69104	3.30103	0.335236	1.68225	2.48632	4.21211
AGAP002481		26S proteasome regulatory subunit N1 [Source:VB Community Annotation]	D	2.83282	4.63726	1.80806	3.29771	0.365958	1.11727	1.50463	0.265214
AGAP011251		ubiquitin-like protein 5 [Source:VB Community Annotation]	D	2.82387	5.55386	2.07425	3.29706	0	0.790078	1.22532	1.38054
AGAP002807		Bromodomain	D	2.80921	2.90982	3.70797	3.29359	0.721836	1.76746	1.57886	2.94941
AGAP004096		Serine/threonine-protein phosphatase 2A 56 kDa regulatory subunit epsilon [Source:VB Community Annotation]	D	5.80365	3.86402	3.40014	3.29177	0.498875	1.7034	3.384	5.80699
AGAP004686		WW domain	D	1.75453	3.24353	2.19136	3.28123	0.232803	0.57398	2.30753	4.00848
AGAP011309		nuclear GTP-binding protein [Source:VB Community Annotation]	D	3.01191	4.09028	1.55745	3.26556	0.228079	1.11863	0.333778	0.525931
AGAP011174		26S proteasome regulatory subunit T1 [Source:VB Community Annotation]	D	2.76232	5.2304	1.81744	3.25149	0.257971	1.66226	0.80618	0.610377
AGAP004817	lig	Protein lingerer [Source:UniProtKB/Swiss-Prot%3BAcc:Q7PMS9]	D	3.95887	5.49826	2.92485	3.24292	0.4453	2.29702	2.35873	2.8358
AGAP013291		Trafficking protein particle complex 3 [Source:VB Community Annotation]	D	3.08515	4.43318	2.24585	3.23428	0.508705	0.430163	0.868169	2.12404
AGAP002969		asparaginyl-tRNA synthetase [Source:VB Community Annotation]	D	2.86161	6.00613	2.87026	3.20148	0	0.935398	0.689772	1.30326
AGAP009179		nucleolar protein 6 [Source:VB Community Annotation]	D	1.47208	3.0128	0.762681	3.19702	0.352553	0.54823	0.15358	0
AGAP006117		nudC	D	2.51642	4.43986	1.54082	3.18851	0.295079	1.63895	0.381093	1.15708
AGAP007125		glutamate-rich WD repeat-containing protein 1 [Source:VB Community Annotation]	D	1.97248	3.12452	0.610324	3.18559	0.246503	1.05321	0.390697	0.319308
AGAP000913		G protein-coupled receptor 107 [Source:VB Community Annotation]	D	3.04699	4.63968	1.68318	3.14737	0.0423147	0.860041	1.14615	2.27394
AGAP009082	DOX-A2	26S proteasome non-ATPase regulatory subunit 3 [Source:VB Community Annotation]	D	3.93599	5.02357	1.48478	3.13864	0.437815	1.57447	0.248599	0.166956
AGAP003006		Surf6	D	1.57616	3.77787	0.971398	3.13627	0.826536	1.26397	0.83912	1.42962
AGAP000685		Unknown	D	3.08959	4.30862	2.40641	3.12562	0	0.69954	0.757572	1.33115
AGAP005723		adenine phosphoribosyltransferase [Source:VB Community Annotation]	D	3.00522	5.36075	2.01011	3.11094	0	1.37241	0.857359	0.582718
AGAP005916		ubiquitin-conjugating enzyme E2 M [Source:VB Community Annotation]	D	3.11934	5.72683	3.55389	3.11068	1.06875	1.2	0.659407	2.93432
AGAP008027		Slowmo [Source:VB Community Annotation]	D	3.67192	4.3707	1.93483	3.10684	0.554066	0.8256	1.10379	3.30354
AGAP011730		ADP-ribosylation factor-like protein 1 [Source:VB Community Annotation]	D	1.62858	5.7324	2.47817	3.0936	0.142607	1.05686	0.363465	0.60829
AGAP000270		nucleolar protein 53 [Source:VB Community Annotation]	D	1.76268	3.53379	1.57193	3.08537	0	0.568177	0.616631	0.639041
AGAP004204		Ras-related protein Rab-4B [Source:VB Community Annotation]	D	3.7343	3.04336	2.25773	3.07503	0.305675	0.475336	1.7011	3.824
AGAP001321		biliverdin IX beta reductase (BVR-B); NADP(H) binding	D	1.66956	5.3894	1.67567	3.07441	0.395179	0.653223	0.234322	1.18468
AGAP009224		6-hydroxyhexanoate dehydrogenase	D	3.11178	3.92252	3.39684	3.06402	0.836793	1.24835	1.11188	4.07237
AGAP012208		glycosyltransferase 25 family member [Source:VB Community Annotation]	D	2.51626	4.92797	2.77875	3.05814	0	0.512447	0.697976	1.04165
AGAP009447		S-adenosylmethionine synthetase [Source:VB Community Annotation]	D	2.90785	4.16944	2.27023	3.04313	0.442112	1.72768	0.729353	2.01381
AGAP011566		Unknown	D	2.26145	2.76217	2.19201	3.03604	0.59814	1.94334	0.729284	1.80662
AGAP007137		Unknown	D	2.61925	4.9473	3.90814	3.03258	0.454682	1.55579	1.8537	0.961945
AGAP006125		Density-regulated protein [Source:UniProtKB/TrEMBL%3BAcc:Q7Q5Z2]	D	0.704381	4.73494	2.0538	3.03188	0.334854	0.840264	0.209857	0.305721
AGAP006690		BTB (POZ) domain containing 9 [Source:VB Community Annotation]	D	2.29789	5.49167	1.5317	3.03092	0.12991	0.832827	0.226716	1.38823
AGAP002509		Unknown	D	3.19332	4.22511	1.43786	3.0296	0.0883036	1.4447	1.26599	1.97057
AGAP011872		ubiquitin-activating enzyme E1 [Source:VB Community Annotation]	D	2.4066	3.95618	2.46303	3.0204	0.863727	1.67894	0.972831	1.68017
AGAP010382	Ars2	Serrate RNA effector molecule homolog [Source:UniProtKB/Swiss-Prot%3BAcc:Q5TUF1]	D	3.99857	3.5791	2.20245	3.02037	0.190115	1.13991	2.46453	3.95027
AGAP012357		Vanin-like protein 1 [Source:VB Community Annotation]	D	2.96337	4.67327	4.21117	3.01941	0.100969	0.733031	0.156781	0.429326
AGAP010297		TACC	D	2.52708	4.46344	1.65394	3.01774	0.674885	1.03904	0.614901	2.44551
AGAP008249		T-complex protein%2C epsilon subunit [Source:VB Community Annotation]	D	1.13808	3.80582	2.05033	3.0157	0.17066	1.28587	0.349372	0.16677
AGAP004142		aspartate aminotransferase%2C cytoplasmic [Source:VB Community Annotation]	D	3.9294	6.22846	3.38558	3.01495	0.819616	1.169	0.670068	1.44209
AGAP001068		ubiquitin-conjugating enzyme E2 H [Source:VB Community Annotation]	D	2.32899	3.35531	1.23293	3.01103	0.381246	0.448784	1.76589	2.39685
AGAP012475		Unknown	D	1.96296	3.91295	2.34543	3.00242	0.17573	0.970572	0	0
AGAP012608		20S proteasome subunit beta 7 [Source:VB Community Annotation]	D	2.23553	3.50041	1.91406	2.99038	0	0.971267	0.373704	0
AGAP005032		calnexin [Source:VB Community Annotation]	D	3.32622	5.17383	2.72975	2.98372	0.214286	1.54589	1.79236	1.48935
AGAP003092		Ras-related C3 botulinum toxin substrate 1 precursor [Source:VB Community Annotation]	D	3.6756	4.31632	2.19038	2.98346	0.172524	0.806811	2.27887	3.50171
AGAP003018		dynamin GTPase [Source:VB Community Annotation]	D	4.28455	4.59216	4.07729	2.98325	0.734552	2.27639	2.48285	3.27424
AGAP006469		cell growth-regulating nucleolar protein [Source:VB Community Annotation]	D	2.03136	3.77202	2.60401	2.97854	0.0741826	1.47868	0.878976	0.997602
AGAP003429		LIM and senescent cell antigen-like domains 1 [Source:VB Community Annotation]	D	3.85743	4.10029	3.18112	2.97309	0.700307	2.01161	1.73075	2.70868
AGAP005931		Differentially expressed in FDCP 8 homolog [Source:VB Community Annotation]	D	2.4137	2.87571	1.57234	2.96644	0.777092	0.948548	1.12619	1.94004
AGAP010514		activator of 90 kDa heat shock protein ATPase [Source:VB Community Annotation]	D	1.10283	4.11092	2.0823	2.9664	0	0.224721	0.755038	0.911646
AGAP007001		ubiquitin thioesterase OTU1 [Source:VB Community Annotation]	D	2.62013	3.86736	1.74495	2.96503	0	0.842798	0.872853	1.46399
AGAP011871		E3 ubiquitin-protein ligase [Source:UniProtKB/TrEMBL%3BAcc:A0A1S4H8V4]	D	3.46134	3.29685	4.01038	2.94781	0.576266	0.790674	0.650064	0.317327
AGAP000562	Moe	Moesin/ezrin/radixin homolog 1 [Source:UniProtKB/Swiss-Prot%3BAcc:Q7PS12]	D	3.28159	5.05869	2.88433	2.94272	0.674595	2.29725	1.68659	2.89795
AGAP003519		ankyrin repeat domain-containing protein 17 [Source:VB Community Annotation]	D	3.18813	3.45494	1.78459	2.93827	0.365803	2.01718	1.33411	1.65688
AGAP003240		Protein jagunal [Source:VB Community Annotation]	D	2.36889	3.77073	3.1295	2.92367	0.114283	0.517226	0.9254	1.61081
AGAP008838		minor histocompatibility antigen H13 [Source:VB Community Annotation]	D	0.99975	4.88168	1.7468	2.91705	0.197681	0.711395	0.225219	1.18314
AGAP000627		casein kinase 1%2C alpha [Source:VB Community Annotation]	D	3.48273	3.72789	1.94139	2.90769	1.03009	1.3264	2.44495	2.89957
AGAP004417		zinc finger protein [Source:VB Community Annotation]	D	1.27922	3.32906	1.76222	2.89742	0.193602	1.0413	0.607472	0.308688
AGAP000997		mitogen-activated protein kinase kinase 1 interacting protein 1 [Source:VB Community Annotation]	D	2.1087	3.74562	3.50697	2.8953	0	1.18147	0.381097	0.271105
AGAP004322		pumilio homology domain family member 6 [Source:VB Community Annotation]	D	1.68765	3.67389	1.32838	2.89381	0.178815	0.808785	0.613365	0.67473
AGAP009181		RING FINGER DOMAIN PROTEINS	D	2.90821	3.05596	2.8504	2.89255	0.293424	1.01133	1.38614	2.62958
AGAP001032		Interferon-related developmental regulator 1 [Source:VB Community Annotation]	D	3.70598	5.17267	2.4707	2.89189	0.133669	2.14667	1.31528	2.1397
AGAP006935		trailer hitch, a component of a ribonucleoprotein complex	D	2.67137	4.21649	3.32006	2.8878	0.43786	1.40379	2.84621	3.43514
AGAP002549		nicalin homolog [Source:VB Community Annotation]	D	2.04249	5.67916	2.08267	2.87332	0.214387	1.11214	0.6983	1.4916
AGAP000322		Adaptin ear-binding coat-associated protein 1 [Source:VB Community Annotation]	D	2.97021	4.84819	2.04614	2.86495	0.239971	0.561512	0.503272	0.917886
AGAP010277		Succinate dehydrogenase assembly factor 3	D	2.60405	3.54176	1.66702	2.86373	0.157062	0.83757	1.45371	1.48816
AGAP004619	pnt	pointed	D	4.56333	3.11419	2.11667	2.86288	0.546693	2.65346	1.99577	4.11274
AGAP011363		Ras-related protein Rab-6A [Source:VB Community Annotation]	D	4.12735	4.65953	2.02066	2.86064	0.604093	1.11162	1.04097	2.80685
AGAP006915		pyruvate dehydrogenase E2	D	2.0455	6.0613	3.82665	2.85968	0	1.17055	1.01378	1.27588
AGAP012108		Ras-related protein Ral-A [Source:VB Community Annotation]	D	3.45075	4.15494	2.17204	2.85136	0.257229	0.461706	1.50738	2.90666
AGAP011546		calcium channel flower [Source:VB Community Annotation]	D	2.97824	5.11708	1.86049	2.84603	0.565685	0.986042	1.30828	2.3158
AGAP004631		calcium ion binding	D	1.42321	5.9211	3.93627	2.83526	0.0962576	1.32928	0.814281	1.74638
AGAP004426		midline fasciclin	D	3.00048	2.81005	4.5527	2.8209	0.185368	0.846375	1.45551	3.79864
AGAP006344		RAG1-activating protein 1-like protein [Source:VB Community Annotation]	D	2.41296	4.29536	3.61055	2.81729	0	0.639024	0.352539	0.368364
AGAP000491		HIG1 domain family member 2A [Source:VB Community Annotation]	D	3.05727	4.84244	1.66652	2.81293	0	1.73214	0.342058	0.66749
AGAP001745		26S proteasome regulatory subunit RPN2 [Source:VB Community Annotation]	D	1.51755	4.52814	0.769306	2.81178	0.0334927	0.29542	0.238726	0.158063
AGAP002054		fermitin family homolog 2 [Source:VB Community Annotation]	D	2.91752	2.79466	2.83477	2.80574	0.444409	0.998818	1.01322	2.27323
AGAP006824		5-formyltetrahydrofolate cyclo-ligase [Source:UniProtKB/TrEMBL%3BAcc:Q7QIG0]	D	1.84032	1.58957	1.89097	2.79766	0	1.19261	0.943971	2.20533
AGAP009685		aspartate aminotransferase%2C mitochondrial [Source:VB Community Annotation]	D	1.88757	4.72208	2.42238	2.79548	0.926872	0.608201	0.744243	1.18154
AGAP012893		Selenium-binding protein	D	2.33705	3.76235	2.74008	2.794	0	1.07442	0.149238	0.915864
AGAP007103		calsyntenin-1 [Source:VB Community Annotation]	D	3.18363	2.67721	2.141	2.77936	0.21503	1.18975	2.85886	4.41899
AGAP012865		Unknown	D	1.07354	3.00131	1.11742	2.7791	0.250365	0	0.246614	0
AGAP008175		TM-CCP domain	D	5.34542	4.7248	4.39586	2.77908	0.315383	1.06656	1.22101	5.53709
AGAP008167		abhydrolase domain containing 4 [Source:VB Community Annotation]	D	2.73449	4.0132	2.67185	2.77808	0.720646	1.30105	1.208	2.06706
AGAP000823		CD81 antigen [Source:VB Community Annotation]	D	3.10839	3.36087	2.39993	2.77664	0	1.4524	1.89406	2.24363
AGAP010909		Unknown	D	1.6654	3.89627	4.06713	2.7722	1.11618	1.08844	1.26313	3.64538
AGAP001621		proline synthetase co-transcribed homolog [Source:VB Community Annotation]	D	3.51072	4.13973	2.38301	2.77056	0.248712	0.944656	1.44561	3.79805
AGAP011964		Integrin alpha N-terminal domain superfamily	D	2.60059	5.39244	3.06872	2.76932	0	0.654584	0.182062	0.821738
AGAP008615		Canopy homolog 2 [Source:VB Community Annotation]	D	1.87126	5.52758	1.42565	2.76924	0.316945	0.829478	0.189127	0
AGAP001407		26S proteasome regulatory subunit T4 [Source:VB Community Annotation]	D	2.69259	3.16788	0.68575	2.76779	0.159049	0.723603	0.190319	0.519969
AGAP011413		CCR4-NOT transcription complex subunit 7/8 [Source:VB Community Annotation]	D	1.75475	3.7459	1.09758	2.76091	0.217414	0.655753	0.379739	0.962362
AGAP007940		Reticulon-like protein [Source:UniProtKB/TrEMBL%3BAcc:A0A1S4GWR7]	D	2.51059	5.31107	2.34839	2.75584	0.192226	1.0451	2.72817	3.88153
AGAP000241		N-acetylglucosamine kinase [Source:VB Community Annotation]	D	1.52681	3.65597	4.53208	2.75156	0.28	1.3831	1.75495	2.68919
AGAP007634		Ras-related GTP-binding protein C/D [Source:VB Community Annotation]	D	1.85998	2.57761	0.866955	2.75056	0.912491	0.74532	0.713707	1.43376
AGAP001601		Ser/Thr protein phosphatase/nucleotidase [Source:VB Community Annotation]	D	2.49377	3.45274	3.09865	2.74902	0.131882	0.613218	0.406144	0
AGAP002943		NAD-dependent deacetylase sirtuin 2 [Source:VB Community Annotation]	D	2.2115	3.47664	2.9193	2.74149	0.300763	0.95635	1.07765	2.14501
AGAP009788		translocation protein SEC62 [Source:VB Community Annotation]	D	4.09506	3.53838	1.92303	2.74024	0.357203	0.542162	2.0271	3.14087
AGAP009547		torsin A [Source:VB Community Annotation]	D	1.6163	5.35441	2.88522	2.73712	0.1093	0.206278	0.108133	0.367749
AGAP004610		signal recognition particle subunit SRP54 [Source:VB Community Annotation]	D	2.32605	5.2165	1.2428	2.7301	0.406986	0.962843	1.37029	2.27334
AGAP002389		ubiquitin-like 4A [Source:VB Community Annotation]	D	4.19082	3.24955	0.46011	2.71873	0	0.866175	0.390093	0.218334
AGAP000617		dual specificity phosphatase [Source:VB Community Annotation]	D	1.73501	2.74394	2.44368	2.71593	0.306772	0.517924	0.296341	1.11835
AGAP001073		BTB/POZ-like	D	3.01685	3.92401	2.37433	2.71587	0.885781	1.70944	2.87003	2.33684
AGAP006340		misshapen/NIK-related kinase [Source:VB Community Annotation]	D	3.08916	3.68635	2.06258	2.70982	0	1.36012	1.78088	3.605
AGAP005122		UBX domain-containing protein 1 [Source:VB Community Annotation]	D	2.50916	5.44305	1.3692	2.70904	0.10651	0.995576	1.03957	0.412869
AGAP006097		target of Myb-like protein 2 [Source:VB Community Annotation]	D	2.1889	4.69327	1.89124	2.69699	0	0.15049	0.588022	2.04876
AGAP008474		calcium and integrin-binding protein 1 [Source:VB Community Annotation]	D	1.53346	2.79037	2.88704	2.68512	0.360269	0.430384	0.115923	0.80225
AGAP001211		Ras-related protein Rab-8A [Source:VB Community Annotation]	D	2.31513	3.7584	1.93307	2.68204	0.592703	0.963237	0.972609	3.68115
AGAP003017		serine/threonine-protein phosphatase 6 catalytic subunit [Source:VB Community Annotation]	D	3.8152	5.51877	2.00396	2.68041	0.111378	1.20108	0.868536	0.557075
AGAP007534		Rhodanese-related sulfurtransferase [Inorganic ion transport and metabolism]	D	2.4073	2.10997	1.67271	2.67538	0	0.107515	1.36353	1.68706
AGAP006247		Survival of motor neuron-related-splicing factor 30 [Source:VB Community Annotation]	D	1.50108	3.2949	1.71204	2.67265	0	0.921099	0.486614	1.00686
AGAP004301		phosphatidylinositol glycan%2C class K [Source:VB Community Annotation]	D	4.11241	3.86359	2.89176	2.67197	0.177533	0.517608	1.32835	2.65567
AGAP005081		mesoderm development candidate 2 [Source:VB Community Annotation]	D	1.81635	4.01612	1.69815	2.66047	0.262851	0.572276	0.238634	0
AGAP007418		proteasome inhibitor subunit 1 (PI31) [Source:VB Community Annotation]	D	1.766	3.45885	4.65757	2.64801	0	1.50255	0.43219	0
AGAP011768		growth factor receptor-binding protein 2 [Source:VB Community Annotation]	D	2.76133	4.69571	2.47915	2.63242	0.269022	1.24541	2.23364	4.15772
AGAP009883		Bax inhibitor 1-related	D	3.11411	5.34839	1.93421	2.63035	0.105566	1.80974	0.631909	1.36592
AGAP001396		inositol monophosphatase 3 [Source:VB Community Annotation]	D	1.37391	3.83546	1.56958	2.62297	0	0.540898	0.571453	0.847923
AGAP005245		pre-lola-G	D	4.08178	2.92185	2.04781	2.61156	0.773255	2.72312	3.13142	4.79711
AGAP001734		nicastrin [Source:VB Community Annotation]	D	1.06239	4.48985	2.45045	2.6102	0.256265	0.215366	0.115932	0.592395
AGAP000812		calcium binding protein [Source:VB Community Annotation]	D	0.926107	1.7572	2.7973	2.60831	0.202247	0.563063	1.21434	1.57934
AGAP006090		nucleolar protein 15 [Source:VB Community Annotation]	D	1.83437	3.37289	0.828072	2.59822	0	1.51595	0.411799	0.589754
AGAP012404		alanine--glyoxylate aminotransferase 2%2C mitochondrial [Source:VB Community Annotation]	D	4.2991	3.37976	3.48432	2.59658	0.22935	1.23127	1.18899	2.48248
AGAP005954		ubiquitin-conjugating enzyme E2 J2 [Source:VB Community Annotation]	D	1.42346	3.75798	0.974974	2.59438	0.0844275	0.568769	0.377196	0.687102
AGAP006570		myo-inositol-1(or 4)-monophosphatase [Source:VB Community Annotation]	D	2.46014	3.50141	1.82643	2.58626	1.36958	1.72849	0.394478	2.34537
AGAP009566		zinc finger protein 271 [Source:VB Community Annotation]	D	4.5173	2.91731	3.43651	2.57847	0.410937	1.19286	2.38539	5.51809
AGAP013296		Peptidyl-prolyl cis-trans isomerase NIMA-interacting 4 [Source:VB Community Annotation]	D	0.447261	3.26951	1.25876	2.57807	0.10971	1.53711	0.401538	0.631197
AGAP010164	whd	protein withered%2C carnitine O-palmitoyltransferase [Source:VB Community Annotation]	D	2.9238	2.76398	4.00511	2.57119	0.736026	0.769935	1.9016	3.45576
AGAP011560		Dbl homology (DH) domain	D	1.84501	4.36626	2.22662	2.55813	0.256736	0.922849	1.76177	4.18057
AGAP003934		Battenin [Source:UniProtKB/TrEMBL%3BAcc:Q7Q2B1]	D	4.53775	3.7688	1.80688	2.55612	0.392691	0.19324	1.1814	2.70879
AGAP008540		phosphatidylinositol glycan%2C class T [Source:VB Community Annotation]	D	1.03634	4.1219	1.10261	2.55171	0.148084	0.515863	0.106833	0
AGAP003405		adenylosuccinate synthase [Source:VB Community Annotation]	D	4.48628	3.6474	1.43118	2.5426	0	1.47638	1.61828	4.66351
AGAP010624		Developmentally regulated GTP-binding protein [Source:VB Community Annotation]	D	0.906691	2.90016	0.602999	2.53809	0.653934	0.315573	0.37027	0.649113
AGAP011158		Kynurenine--oxoglutarate transaminase 3 isoform 1 [Source:VB Community Annotation]	D	2.18668	3.34033	2.07254	2.52482	0.0931622	0.950345	0.790447	0.750808
AGAP008884		protoheme IX farnesyltransferase [Source:VB Community Annotation]	D	2.45459	3.42014	2.46712	2.52327	0.640069	0.805706	0.425303	0.459057
AGAP012148		Mitogen-activated protein kinase [Source:UniProtKB/TrEMBL%3BAcc:Q7PZY6]	D	0	4.7969	1.6926	2.51877	0.186691	0.94813	0.784861	1.25258
AGAP012590		MutT domain protein-like protein [Source:VB Community Annotation]	D	1.91557	3.51264	2.11963	2.51555	0.268266	0.847021	0.529506	0
AGAP000285		TMEM120 family	D	2.24796	3.94392	1.97528	2.51396	0.0663154	0.628015	0.951315	2.23177
AGAP011767		protein farnesyltransferase/geranylgeranyltransferase type-1 subunit alpha [Source:VB Community Annotation]	D	2.32214	3.64216	0.500201	2.50992	0	0.435282	0.597276	0
AGAP003789		flotillin [Source:VB Community Annotation]	D	3.56239	3.55828	1.95067	2.50855	0	0.545624	1.13614	3.37573
AGAP004079		low molecular weight phosphotyrosine protein phosphatase [Source:VB Community Annotation]	D	2.66707	3.70026	0.818883	2.50656	0.400295	0.706769	1.20814	1.35204
AGAP000995		trafficking protein particle complex 1 [Source:VB Community Annotation]	D	2.88444	4.56194	3.62818	2.49524	0	0.87145	0.366107	0.969089
AGAP010072		Iron--sulfur cluster insertion protein erpA 1 [Source:VB Community Annotation]	D	2.99966	3.10995	0.721076	2.49465	0	0.56502	0.248046	0.279986
AGAP001884		fumarate hydratase%2C class II [Source:VB Community Annotation]	D	3.09635	2.62464	2.22976	2.49301	0.782767	2.01803	1.50595	0.262221
AGAP012439		Src homology 3 domain of Apoptosis Stimulating of p53 proteins (ASPP); contains many ankyrin repeats	D	2.69244	1.89655	1.8124	2.48402	0.322156	0.903232	1.07155	2.72844
AGAP004692		Ras GTPase-activating protein	D	2.5117	2.14135	3.2084	2.46579	0.818358	1.76529	2.25916	4.23032
AGAP002161		RAC serine/threonine-protein kinase [Source:VB Community Annotation]	D	2.68612	3.49688	4.04949	2.4633	0.78778	1.71883	1.2041	2.12808
AGAP008707		Maf-like protein yceF 1 [Source:VB Community Annotation]	D	0.250403	2.59348	1.29123	2.45765	0	1.90532	0.627225	1.51092
AGAP010769		glucosamine-phosphate N-acetyltransferase [Source:VB Community Annotation]	D	0.488964	2.8487	1.04004	2.44839	0	0.575911	0.841899	0.605091
AGAP005551		Unknown	D	0.897461	2.58768	1.8598	2.44647	0.814945	1.01515	0.778324	1.43949
AGAP005559		26S proteasome regulatory subunit N10 [Source:VB Community Annotation]	D	2.95092	4.74279	1.73207	2.44309	0	1.32972	0.349917	0
AGAP000930		Coronin [Source:UniProtKB/TrEMBL%3BAcc:Q7QI35]	D	3.36694	2.9653	2.46305	2.44139	0.51392	0.853079	1.62144	1.22674
AGAP000149		Ras association domain-containing protein 2/4 [Source:VB Community Annotation]	D	2.305	2.44146	1.90662	2.43949	0.295021	1.16775	2.86994	3.30537
AGAP012189		abhydrolase domain-containing protein 12 [Source:VB Community Annotation]	D	3.40317	2.8917	2.25457	2.42689	0	0.404567	0.203854	1.13597
AGAP003216		26S proteasome regulatory subunit T2 [Source:VB Community Annotation]	D	1.56386	3.56973	1.37007	2.42469	0.132675	1.21554	0.202915	0
AGAP006906		Cat eye syndrome critical region protein 1 [Source:VB Community Annotation]	D	2.73289	3.6852	2.11626	2.4203	0.322803	0.385006	0.869819	1.70947
AGAP010314		GTPase activity	D	1.68219	3.32326	2.32469	2.41151	0.0669555	0.472505	0.538282	1.02609
AGAP003904		AIF-like mitochondrial oxidoreductase (Nfrl) [Source:VB Community Annotation]	D	1.74996	4.4584	1.90833	2.41039	0.183437	1.34199	2.13374	2.2943
AGAP001099		Polybromo-1 [Source:VB Community Annotation]	D	2.71527	3.08773	1.75205	2.40407	0.376254	0.95154	3.36386	5.78417
AGAP000022		amino acid transporter protein [Source:VB Community Annotation]	D	4.38152	4.49826	4.00079	2.40105	0	0.343853	1.31774	0.518077
AGAP011627		polyadenylate-binding protein-interacting protein 1 [Source:VB Community Annotation]	D	2.7152	4.80856	2.17185	2.39879	0.370027	0.882297	1.55354	3.95675
AGAP009948		signal recognition particle subunit SRP19 [Source:VB Community Annotation]	D	2.64667	3.82707	2.0396	2.3977	0.246906	1.12299	1.5203	2.39312
AGAP002923		bystin [Source:VB Community Annotation]	D	3.35075	3.35497	1.42349	2.39707	0.234219	0.670131	1.06811	2.07192
AGAP005076		bridging integrator [Source:VB Community Annotation]	D	1.93816	3.60945	0.692127	2.39566	0.513683	0.514231	2.80515	3.45248
AGAP005904		guanine nucleotide-binding protein G(i) subunit alpha [Source:VB Community Annotation]	D	2.70722	3.38818	1.50084	2.39216	0.684383	1.3862	1.40938	3.57283
AGAP010234		microsomal triglyceride transfer protein large subunit [Source:VB Community Annotation]	D	1.48888	4.71805	1.2777	2.39046	0	1.1952	0.540659	1.56127
AGAP007801		vrille [Source:VB Community Annotation]	D	2.80567	1.70953	3.30466	2.38449	0.628273	1.27773	1.40319	2.18419
AGAP011247		Longitudinals lacking protein-like [Source:VB Community Annotation]	D	4.42684	4.97231	2.40561	2.37367	0.711053	1.50172	2.99069	3.59541
AGAP002808		rRNA small subunit pseudouridine methyltransferase Nep1 [Source:VB Community Annotation]	D	2.0394	3.43249	1.01817	2.36948	0	0.884433	0.280118	1.85507
AGAP007975		pyruvate dehydrogenase E2 component (dihydrolipoamide acetyltransferase) [Source:VB Community Annotation]	D	1.54726	4.64342	1.59919	2.35349	0.276996	1.14925	0.878183	2.99644
AGAP004933		ankyrin repeat and MYND domain-containing protein 2 [Source:VB Community Annotation]	D	1.14876	3.50628	0.34382	2.33089	0	0.283198	0.610982	0.280051
AGAP005531		programmed cell death 6-interacting protein [Source:VB Community Annotation]	D	1.07708	3.07694	1.88703	2.32709	0.29418	0.78982	0.484735	0
AGAP005562		RING-box protein 2 [Source:VB Community Annotation]	D	3.06362	2.48505	1.84817	2.3185	0.72371	0.605594	1.74968	1.14025
AGAP008634		zinc finger CCCH domain-containing protein 15 [Source:VB Community Annotation]	D	1.46473	3.89902	0.584912	2.31704	0.342512	0.757633	0.265964	0.173179
AGAP000439		4a-hydroxytetrahydrobiopterin dehydratase [Source:VB Community Annotation]	D	2.11166	4.51237	1.7464	2.31357	0.500358	1.28327	0.959384	0.844689
AGAP012845		Selenium-binding protein [Source:VB Community Annotation]	D	2.06921	3.43971	2.03636	2.31283	0.201423	0.929097	0.316836	1.08188
AGAP011779		Unknown	D	3.14467	2.92995	1.71173	2.30771	0.217418	1.01109	0.969679	1.31749
AGAP008195		protein kinase%2C AMP-activated%2C beta 2 non-catalytic subunit [Source:VB Community Annotation]	D	1.53203	2.82802	2.8081	2.30621	0	0.899878	0.623572	0.668481
AGAP002408		Unknown	D	3.09756	3.68859	0.883358	2.28984	0.301871	0.598268	0.25217	0.367435
AGAP012272		blocked early in transport 1 [Source:VB Community Annotation]	D	2.25646	2.85454	1.90086	2.2785	0.26308	0.353885	0	0
AGAP005381		hexosaminidase [Source:VB Community Annotation]	D	2.85173	3.94389	2.37082	2.27486	0	0.636676	0.0992137	0.387601
AGAP003028		Ras-related protein Rab-35 [Source:VB Community Annotation]	D	1.73591	5.44801	3.62519	2.27187	0	1.50392	1.66158	3.17411
AGAP000304		Protein twisted gastrulation [Source:VB Community Annotation]	D	0.801687	2.0631	2.74377	2.26314	0.373842	1.43912	1.36326	3.24961
AGAP009624	CTPsyn	CTP synthase [Source:VB Community Annotation]	D	1.30628	1.95362	0.788254	2.25922	0.0610749	0.795775	1.50331	0.34286
AGAP001028		Unknown	D	2.45687	2.79902	1.15494	2.25678	0	0.654217	1.28367	3.03922
AGAP010536		nucleolar complex protein 2 [Source:VB Community Annotation]	D	3.18519	4.16163	0.469852	2.25123	0	0.269098	1.34243	2.07222
AGAP009037		Dynamin associated protein 160	D	2.00433	3.15625	2.08544	2.24323	0.176743	0.846034	0.822599	1.75261
AGAP004459		ubiquitin-like 1-activating enzyme E1 A [Source:VB Community Annotation]	D	1.90393	3.3818	1.92203	2.24178	0.263825	0.264635	0.831533	0.758434
AGAP001471		3-phosphoinositide dependent protein kinase-1 [Source:VB Community Annotation]	D	0.723529	2.04304	1.78091	2.24047	0.251398	1.23903	1.36688	2.43791
AGAP008637	APG7A	autophagy related gene [Source:VB Community Annotation]	D	2.23333	4.05035	0.600161	2.23394	0.103954	0.228941	0.33023	0.97226
AGAP003439		Zinc finger, FLYWCH-type	D	3.77424	3.76244	2.90608	2.23198	0.327884	1.70612	3.27199	5.64699
AGAP008408		Unknown	D	4.0724	4.43348	2.37889	2.23111	0.254509	0.784548	2.00858	4.179
AGAP010142	Dat	dopamine N-acetyltransferase [Source:VB Community Annotation]	D	4.25242	3.4714	3.83127	2.22857	0.261392	1.45712	1.92339	2.77965
AGAP007494		flotillin [Source:VB Community Annotation]	D	3.6389	3.34066	2.11279	2.22818	0	0.527884	2.03505	2.05906
AGAP000351	GPRNPY1	GPRNPY1	D	2.77457	3.67203	3.07172	2.22722	0.179433	0.811997	0.87752	1.44563
AGAP003742		regulator of chromosome condensation [Source:VB Community Annotation]	D	2.82214	3.46022	1.04345	2.22622	0.943601	0.440755	0.578002	1.67485
AGAP011838		Unknown	D	1.93319	2.06166	0.790844	2.22253	0.136665	0.588444	0.317089	1.58382
AGAP003817		YTH domain/may remove transcripts of meiosis-specific genes expressed in mitotic cells	D	2.18388	3.30692	2.46037	2.22198	0.0999446	0.714342	1.55274	2.48862
AGAP005449		E3 ubiquitin-protein ligase CBL [Source:VB Community Annotation]	D	2.29062	2.80128	2.3006	2.211	0.0542579	1.45185	1.28442	3.65646
AGAP001651		26S proteasome regulatory subunit N9 [Source:VB Community Annotation]	D	2.69713	3.73867	1.23714	2.19723	0	0.709329	0.133497	0.221886
AGAP007879		Steroid dehydrogenase [Source:VB Community Annotation]	D	0.552554	2.75302	0.980223	2.18308	0	0	0	1.05308
AGAP012144		endoplasmic reticulum-Golgi intermediate compartment protein 3 [Source:VB Community Annotation]	D	2.96336	3.39148	1.78675	2.17996	0	0.0873142	0.494941	1.0202
AGAP010421		pyruvate dehydrogenase E1 component subunit beta [Source:VB Community Annotation]	D	2.71261	3.13334	0.736845	2.1795	0	0.889889	1.70167	3.19551
AGAP010732		Unknown	D	2.65454	2.90149	1.5635	2.17802	0.201137	1.22475	0	1.72555
AGAP008541		cyclin-dependent kinase 9 [Source:VB Community Annotation]	D	3.35473	2.79331	1.73328	2.17696	0	0.849932	0.12931	0.26734
AGAP001713		stearoyl-CoA desaturase (delta-9 desaturase) [Source:VB Community Annotation]	D	2.74124	2.9181	1.29562	2.17512	0.334604	1.83551	1.99236	4.25202
AGAP004937		Upstream of N-ras	D	2.02226	1.75286	1.05559	2.17295	0.666511	0.843367	1.46879	4.39466
AGAP007651		growth arrest and DNA-damage-inducible protein [Source:VB Community Annotation]	D	1.22767	3.34631	1.50165	2.17239	0	1.04601	0.421133	0.969396
AGAP009811		Cdk5rap3 [Source:VB Community Annotation]	D	2.37526	3.34632	1.52522	2.16423	0.101152	0.948099	0.0751862	0.217887
AGAP011091		Unknown	D	2.82589	3.7195	1.72368	2.16097	0.299365	0.351833	0	0.680757
AGAP010436		adenylate cyclase 2 [Source:VB Community Annotation]	D	4.63441	3.40218	2.34738	2.16005	0.313783	1.36938	1.89371	3.06613
AGAP010875		Ras-related protein Rab-18 [Source:VB Community Annotation]	D	2.77237	2.48492	1.87457	2.15819	0	0.422838	0.276994	1.04606
AGAP003336		tetratricopeptide repeat domain 1 variant [Source:VB Community Annotation]	D	1.29326	3.15046	1.28419	2.15793	0	1.02363	0.579917	0.587469
AGAP002883		Oxoglutarate/iron-dependent dioxygenase	D	3.5856	4.88793	1.10937	2.152	1.31491	1.39178	0.963278	1.12181
AGAP001092		LDLRA	D	1.43343	4.80838	2.96687	2.14878	0.137386	1.08826	0	0.963559
AGAP008652		phosphotyrosyl phosphatase activator protein [Source:VB Community Annotation]	D	0.432646	2.22496	0.394398	2.14591	0	0.147516	0.337675	0.216353
AGAP007654		Ras-related protein Rab-32 [Source:VB Community Annotation]	D	1.92001	3.6181	1.75493	2.13681	0.486676	0.576155	1.64134	1.38917
AGAP011463		src homology 2 domain-containing transforming protein C [Source:VB Community Annotation]	D	2.11439	3.61039	0.50677	2.13136	0	0.614464	0.641647	1.17019
AGAP001746		Transport and Golgi organization 11	D	1.66119	2.5015	1.15613	2.12826	0	0.297442	0.384936	0.659662
AGAP010682		Troponin C-akin-1	D	2.24838	3.24571	1.27617	2.12358	0	0.485784	0.421251	0
AGAP006161		suppressor of G2 allele of SKP1 [Source:VB Community Annotation]	D	1.47649	4.21988	1.09482	2.1123	0.116426	0.849147	0.231072	0.964152
AGAP001914		cell division cycle protein 37 [Source:VB Community Annotation]	D	2.81746	3.49877	1.60131	2.10816	0	1.58009	0.38589	1.1458
AGAP006939		Armitage [Source:VB Community Annotation]	D	0.909243	1.74446	1.69796	2.10794	0.109186	0.8439	0.731716	0.289074
AGAP008099		Ubiquitin-fold modifier-conjugating enzyme 1 [Source:UniProtKB/Swiss-Prot%3BAcc:Q7PND3]	D	4.05654	3.75752	1.37069	2.10776	0.552339	1.00162	1.96854	1.96746
AGAP009659		Unknown	D	2.2968	3.03259	2.74761	2.09791	0.453527	0.986362	0.606756	0.896564
AGAP005654		Nitric oxide synthase-interacting protein homolog [Source:UniProtKB/TrEMBL%3BAcc:Q7Q6V1]	D	0.949941	2.38269	1.37648	2.09299	0	0.604479	0.144652	1.32161
AGAP001046		Abl interactor 2 [Source:VB Community Annotation]	D	2.09052	3.32265	1.09936	2.09097	0.0811947	0.456636	0.843432	2.69808
AGAP006715		serine/threonine-protein kinase OSR1/STK39 [Source:VB Community Annotation]	D	1.10065	1.82233	0.713155	2.08546	0	0.243233	0.197563	0
AGAP000760		alkylated DNA repair protein alkB homolog 7 [Source:VB Community Annotation]	D	0.59855	1.35092	0.138605	2.07801	0	0.38494	0.303272	0.719307
AGAP007391		Coenzyme Q10 homolog B (S. cerevisiae) [Source:VB Community Annotation]	D	2.31601	2.87671	1.60577	2.07776	0.565747	0.668431	1.69561	2.70885
AGAP004734		PAX-interacting protein 1 [Source:VB Community Annotation]	D	2.62104	1.50041	1.91635	2.06354	0.753077	2.15189	1.18479	1.25752
AGAP010491		N-acetyltransferase 10 [Source:VB Community Annotation]	D	0.976433	2.17798	0.365905	2.05691	0	0.860244	0.377718	1.73942
AGAP008150		Metaxin-2 [Source:VB Community Annotation]	D	1.64568	1.62433	1.29691	2.05092	0	0.214864	0.408365	0.186481
AGAP011531		Selenium-binding protein 2 [Source:VB Community Annotation]	D	1.86273	3.09183	1.80695	2.04816	0.162988	0.926775	0.303562	0.446221
AGAP004830		AGAP004830	D	1.4629	1.99299	1.09379	2.04613	0.116327	0.539422	0.640756	1.05523
AGAP010318		guanine nucleotide-binding protein subunit beta-5 [Source:VB Community Annotation]	D	1.20668	3.10226	1.5462	2.04471	0.108714	0.547852	0	0.92442
AGAP008339		signal recognition particle subunit SRP14 [Source:VB Community Annotation]	D	1.23399	2.74232	2.11911	2.04154	0.410141	1.2284	0.125376	0.944788
AGAP005260		dTMP kinase [Source:VB Community Annotation]	D	1.60257	4.79286	0.541736	2.03699	0	1.19363	0.976332	1.29678
AGAP009030		CCR4-NOT transcription complex subunit 3 [Source:VB Community Annotation]	D	2.81908	3.24629	2.29263	2.03612	0.531442	1.32637	1.95459	2.81906
AGAP000757		peptide-O-fucosyltransferase [Source:VB Community Annotation]	D	2.28527	4.04185	2.14151	2.03392	0	0.315297	0.522185	1.01709
AGAP004483		Lethal giant larvae [Source:VB Community Annotation]	D	1.73135	1.74974	0.542326	2.03106	0.206261	0.937058	1.81914	3.72943
AGAP000378		programmed cell death protein 4 [Source:VB Community Annotation]	D	3.36556	2.31176	2.29287	2.02601	0.255679	1.16589	0.709174	0.726375
AGAP003200		NipSnap homolog 2 [Source:VB Community Annotation]	D	2.08935	2.67204	1.02161	2.02004	0.297842	0.479057	1.38941	0.790481
AGAP005029		serine-threonine kinase receptor-associated protein [Source:VB Community Annotation]	D	2.17712	3.31322	1.99561	2.01764	0.0546235	0.517697	0.418959	0.9416
AGAP007996		nuclear receptor-binding protein [Source:VB Community Annotation]	D	2.4015	1.66274	1.54124	2.01498	0.891481	0.76225	3.18267	4.82559
AGAP000013		Unknown	D	2.84876	1.74873	1.74803	2.01482	0.464952	0.584106	1.11588	2.68205
AGAP003883		peptidyl-tRNA hydrolase%2C PTH2 family [Source:VB Community Annotation]	D	1.10464	3.3748	1.25952	2.01278	0	0.435522	0.163812	0.699934
AGAP003063		Rwd domain-containing protein [Source:VB Community Annotation]	D	1.53053	2.6872	1.28595	2.01117	0.220289	0.428915	0	0.378091
AGAP006653		Protein rogdi [Source:VB Community Annotation]	D	5.15119	3.06542	0.817825	2.00983	0.751365	0.864791	2.86991	5.8319
AGAP004679		Folylpolyglutamate synthase [Source:UniProtKB/TrEMBL%3BAcc:Q5TSB4]	D	3.46014	4.08889	2.0051	2.00933	0.222767	0.569553	0.501498	3.97077
AGAP007968		cysteine-rich with EGF-like domain protein 2 [Source:VB Community Annotation]	D	1.14988	3.84104	0.0802691	2.00576	0.0754014	0.94418	0.606149	1.13423
AGAP010821		Fasciclin 3	D	1.62457	2.35528	3.37016	2.00343	0	0.83514	0.101918	1.46137
AGAP001243		Ankyrin repeat-containing domain	D	3.89885	3.18337	3.64905	1.98988	0.14425	1.50217	1.52987	4.06855
AGAP012050		cell differentiation protein RCD1 homolog [Source:VB Community Annotation]	D	1.88126	2.80184	0.783437	1.9874	0	0.573319	0.31352	0.19621
AGAP012463		ER degradation enhancer%2C mannosidase alpha-like 2 [Source:VB Community Annotation]	D	2.50621	3.67312	0.31594	1.98155	0.112107	1.74043	1.96021	4.53371
AGAP010276		pyruvate dehydrogenase kinase [Source:VB Community Annotation]	D	2.91443	5.09675	2.43584	1.98029	0.436538	1.65216	2.16627	4.57449
AGAP011884		nucleolar protein 4 [Source:VB Community Annotation]	D	1.65051	2.08969	0.578033	1.98013	0	0.334394	0.71384	1.19628
AGAP004071		fimbrin [Source:VB Community Annotation]	D	1.86294	2.6918	2.20254	1.9768	0	0.577086	1.17777	1.18195
AGAP001157		E3 ubiquitin-protein ligase UBR4 [Source:VB External Description;Acc:AGAP001157]	D	2.69525	2.45115	1.16314	1.96942	0.630126	1.83458	3.20726	4.15192
AGAP007258		aconitate hydratase 1 / homoaconitase [Source:VB Community Annotation]	D	1.95199	3.76669	1.95413	1.96909	0.284575	0.793372	0	0.904258
AGAP004102		Unknown	D	1.04134	1.67767	1.84706	1.96131	0.246305	0.496904	0.592881	0.439013
AGAP008859		Insulin receptor substrate-1, PTB	D	2.39726	1.7391	2.06119	1.95105	0.405121	1.54646	1.86031	2.67734
AGAP007952		ubiquitin-conjugating enzyme E2 D/E [Source:VB Community Annotation]	D	1.15102	3.32065	1.96635	1.94865	0	0.997035	0.420749	0.181542
AGAP009507		ubiquitin thioesterase protein OTUB1 [Source:VB Community Annotation]	D	2.14034	4.94574	1.0924	1.94538	0.255476	1.11092	0.406079	0.338602
AGAP004940		cAMP-dependent protein kinase regulator [Source:VB Community Annotation]	D	4.46602	1.1427	1.93094	1.94498	0.8581	0.629427	1.6437	5.76369
AGAP003552		SET and MYND domain-containing protein 5 [Source:VB Community Annotation]	D	1.09002	2.81307	0.631748	1.94413	0.663423	0.768715	0.980873	0.679478
AGAP011478		Lipocalin / cytosolic fatty-acid binding protein family	D	1.39812	2.17783	0.787451	1.94298	0.49259	0.888394	0.854884	2.58898
AGAP002736		Unknown	D	1.80784	3.76722	1.61798	1.94018	0	1.07112	0.395542	0.745665
AGAP006238		ubiquitin-conjugating enzyme E2 C [Source:VB Community Annotation]	D	1.99955	4.15116	1.34359	1.93994	0.405613	1.23797	1.26417	2.66265
AGAP009523		Major facilitator superfamily domain-containing protein 1 [Source:VB Community Annotation]	D	2.36308	2.2167	1.725	1.93451	0.352121	0.0979718	0.50744	0.970868
AGAP002166		A-kinase anchor protein 1%2C mitochondrial [Source:VB Community Annotation]	D	3.00332	3.11299	1.61946	1.9306	0	1.68582	0.80539	2.25591
AGAP003488		nucleotide exchange factor SIL1 [Source:VB Community Annotation]	D	0.927928	2.47465	1.09313	1.92246	0.0984367	0.545506	0.62423	1.07709
AGAP010539		coiled-coil and C2 domain-containing protein 1-like [Source:VB Community Annotation]	D	2.44063	3.25247	1.06376	1.91684	0.127188	0.131398	0.8937	1.38202
AGAP011814		guanine nucleotide binding protein (G protein)%2C beta polypeptide 1-like [Source:VB Community Annotation]	D	1.99212	1.37054	1.93348	1.91606	0.145067	0.250049	0.730133	0.213409
AGAP004353		dual specificity phosphatase [Source:VB Community Annotation]	D	2.36061	2.1291	0.949589	1.9086	0.234324	1.15093	1.07673	3.4573
AGAP010478		Protein crossbronx homolog [Source:UniProtKB/Swiss-Prot%3BAcc:Q7PRH1]	D	2.90363	1.35499	0.670542	1.89744	0	0.256898	0.602785	1.4569
AGAP010891		ariadne-1 [Source:VB Community Annotation]	D	4.68651	3.10521	2.17239	1.89645	0.227931	1.20534	3.48785	4.0637
AGAP002982		E3 SUMO-protein ligase RanBP2 [Source:VB Community Annotation]	D	1.48261	2.46214	0.196764	1.89589	0.0685966	0.649844	0.611802	0.417271
AGAP008297		leucyl-tRNA synthetase [Source:VB Community Annotation]	D	0.300654	4.38294	0.380226	1.89334	0.190214	1.05654	0.201789	0.584622
AGAP000392		synaptobrevin homolog YKT6 [Source:VB Community Annotation]	D	2.51521	3.59659	3.82349	1.89104	1.07403	0.413478	1.29737	1.01342
AGAP007492		signal recognition particle subunit SRP9 [Source:VB Community Annotation]	D	2.10745	1.9004	0.581867	1.88559	0.526632	1.00759	0.867883	0.824114
AGAP004307		aprataxin [Source:VB Community Annotation]	D	1.74458	2.16188	1.85175	1.88082	0.360897	0.539252	1.41417	1.55866
AGAP000824		bone morphogenetic protein 5 [Source:VB Community Annotation]	D	2.24705	2.10955	1.65046	1.87787	0.266215	0.57835	1.03865	2.70383
AGAP009325		Unknown	D	1.04493	2.68392	1.96186	1.87674	0.576512	0.644831	0.968532	0.532177
AGAP005282		guanine deaminase [Source:VB Community Annotation]	D	1.47351	2.24566	0.351138	1.87386	0	0.564376	1.13594	1.97887
AGAP006162		TatD DNase family protein [Source:VB Community Annotation]	D	1.041	2.7588	0.680332	1.87211	0	0.799695	0.353732	1.53266
AGAP005801		Unknown	D	0.831794	3.38876	1.32078	1.87083	0	0.0867613	0.375484	0.52379
AGAP012228		NGG1 interacting factor 3-like protein [Source:VB Community Annotation]	D	1.80498	3.35044	0.472809	1.8675	0	0.683652	0.181808	0.267414
AGAP009161		deoxyribose-phosphate aldolase [Source:VB Community Annotation]	D	0.352262	1.4427	0.561348	1.86697	0	0.510944	0	0.699378
AGAP002028		E3 ubiquitin-protein ligase RNF13 [Source:VB Community Annotation]	D	2.20204	2.38335	1.9968	1.86594	0.179788	0.269307	0.718115	1.74999
AGAP009100		Protein-glutamine gamma-glutamyltransferase E [Source:VB Community Annotation]	D	2.51341	4.03535	1.33796	1.8637	1.00939	1.59191	1.82678	4.27286
AGAP002036		zinc finger%2C FYVE domain containing 1 [Source:VB Community Annotation]	D	0.960379	2.85716	1.92503	1.85941	0.105831	1.18093	0.391238	1.41405
AGAP009970		Cullin-associated NEDD8-dissociated protein 1 [Source:VB Community Annotation]	D	1.60897	2.21591	1.10276	1.8562	0.368047	0.949343	1.37351	0.477583
AGAP002286		Unknown	D	2.64407	2.73416	1.61505	1.85546	0	0.790498	1.61097	1.59973
AGAP006159		Ras-related protein Rab-5C [Source:VB Community Annotation]	D	1.13152	3.18829	2.2107	1.85501	0.740724	1.16872	1.24715	1.90001
AGAP004321		peptidyl-prolyl cis-trans isomerase NIMA-interacting 1 [Source:VB Community Annotation]	D	1.21351	3.49879	0.896323	1.85065	0.109967	0.46724	0.184918	0.43147
AGAP012746		Phyhd1 protein [Source:VB Community Annotation]	D	0.804926	1.49692	0.54222	1.84974	0.0897152	0.366952	0.521539	0.403895
AGAP005715		Autophagy-related protein 13 [Source:UniProtKB/TrEMBL%3BAcc:Q7Q6R5]	D	3.58845	3.45179	2.3443	1.84786	0.425735	1.7259	1.56519	1.16423
AGAP001804	Nmt	Glycylpeptide N-tetradecanoyltransferase [Source:UniProtKB/TrEMBL%3BAcc:Q7PY97]	D	1.24886	2.08433	1.2432	1.84259	0.551793	0.22008	0.884506	0.828428
AGAP003171		nucleolar protein 12 [Source:VB Community Annotation]	D	1.61532	2.92267	0.834235	1.84226	0.0789148	0.710775	0.361058	0.538802
AGAP000444	Ciao1	cytosolic iron-sulfur protein assembly protein [Source:VB Community Annotation]	D	2.59188	4.69871	2.30301	1.84181	0.733865	1.80844	0.586041	0.238979
AGAP010217		protein disulfide-isomerase [Source:VB Community Annotation]	D	2.05345	4.37091	0.324396	1.84115	0.08717	0.182756	0.549086	0
AGAP008769		very long chain acyl-CoA dehydrogenase [Source:VB Community Annotation]	D	0.973315	3.1346	1.09137	1.84025	0.0761971	0.430823	0.881272	0.501352
AGAP007640		Unknown	D	1.47491	1.43087	2.29674	1.83701	0.146828	0.906807	0.799604	1.11143
AGAP009335		F-box and leucine-rich repeat protein 15 [Source:VB Community Annotation]	D	0.670451	2.32111	1.12061	1.83281	0	0.215625	0.393578	0.672925
AGAP009445		Unknown	D	1.85722	4.48476	1.647	1.83216	0.239435	0.357719	0.480135	0
AGAP002193		nuclear RNA export factor 1/2 [Source:VB Community Annotation]	D	2.64229	1.95654	0.878833	1.83081	0.208077	0.340864	0.144901	1.86435
AGAP008232		Unknown	D	1.38797	1.34747	1.66418	1.82631	0.500616	0.729127	1.39169	2.21525
AGAP010693		periodic tryptophan protein 2 [Source:VB Community Annotation]	D	0.279138	2.30145	0.529568	1.82569	0.256071	0.387921	0.379583	0.750241
AGAP005823		Ubiquitin-related modifier 1 homolog [Source:UniProtKB/Swiss-Prot%3BAcc:Q7Q6I6]	D	1.41425	1.2121	1.39745	1.82534	0	0.0618647	0.972344	2.56946
AGAP011994		phosphopantothenoylcysteine decarboxylase [Source:VB Community Annotation]	D	1.20879	2.43524	1.00566	1.82438	0.340144	0.358091	0.777991	1.30912
AGAP004025	GPRMTH5	methuselah receptor 5 [Source:VB Community Annotation]	D	0.894235	2.53947	0.853045	1.82275	0	0.136175	0.787185	1.52548
AGAP004227		ADP-ribosylation factor-like protein [Source:VB Community Annotation]	D	2.88546	4.81252	2.90411	1.82192	0.895679	0.949563	1.97099	2.37482
AGAP007729		activin receptor type-1 [Source:VB Community Annotation]	D	1.96601	3.42992	1.6026	1.82155	0.545284	0.419225	0.972729	3.61442
AGAP004786		Pyruvate dehydrogenase E1 component subunit alpha [Source:UniProtKB/TrEMBL%3BAcc:Q7Q2S3]	D	1.12307	0.915616	1.8753	1.8192	0	0.276772	0.135227	0.451221
AGAP012350		Echinoderm microtubule associated protein like 1 [Source:VB Community Annotation]	D	1.62904	1.69164	1.11686	1.80738	0.239381	0.162434	0.693644	0.427089
AGAP006819		abhydrolase domain-containing protein 1/3 [Source:VB Community Annotation]	D	3.2575	2.66387	2.65801	1.80609	0.203694	0.183546	0.759353	1.94258
AGAP008287		Programmed cell death protein [Source:VB Community Annotation]	D	2.06831	3.45343	1.83103	1.80474	0.311068	0.348502	1.15014	2.1968
AGAP001677		Cyclin C/H/T/L	D	1.01796	2.61081	1.69712	1.79401	0.247277	0.358754	0.440395	1.71502
AGAP003121		phosphatidylinositol 4-kinase type 2 [Source:VB Community Annotation]	D	2.92653	2.86547	1.65843	1.79371	0.205911	1.24446	0.70315	1.17136
AGAP008877		Unknown	D	2.78503	2.78961	2.67106	1.78992	0	0.471461	0.737621	0.936193
AGAP006107		triple functional domain (PTPRF interacting) [Source:VB Community Annotation]	D	2.88221	1.05568	1.16002	1.78832	0.461082	1.54773	2.61901	4.81703
AGAP000646		Myc proto-oncogene protein [Source:VB Community Annotation]	D	2.07291	2.22835	1.97489	1.78522	0.729323	1.75317	1.44985	1.51352
AGAP006245		zinc finger matrin-type protein 2 [Source:VB Community Annotation]	D	1.4846	2.99964	2.56755	1.7841	0	1.04917	0.424123	0.611513
AGAP007577		Histidine triad nucleotide binding protein 3 [Source:VB Community Annotation]	D	0.620111	2.46046	0.882023	1.78133	0.247628	0.949456	0.64742	0.883388
AGAP004769		Ras-related protein Rap-1b precursor [Source:VB Community Annotation]	D	4.23342	2.67924	1.71195	1.77966	0.395281	0.758581	1.29297	5.27952
AGAP003901		pickled eggs/negative regulator of Notch signalling	D	1.85203	2.36758	3.10681	1.77504	0.535529	1.0325	1.77653	3.75595
AGAP004336		UTP11-like%2C U3 small nucleolar ribonucleoprotein [Source:VB Community Annotation]	D	1.32089	2.63522	0.687502	1.77316	0	0.138788	0.354296	0.731251
AGAP009160		Arf-GAP%2C GTPase%2C ANK repeat and PH domain-containing protein 1/2/3 [Source:VB Community Annotation]	D	2.37297	1.99535	1.48165	1.77269	0.355739	0.637361	0.881958	2.61766
AGAP002488		REST corepressor [Source:VB Community Annotation]	D	4.5735	1.55895	0.980175	1.77265	0.228538	0.586379	3.35266	6.56725
AGAP012064		MAP/microtubule affinity-regulating kinase [Source:VB Community Annotation]	D	2.58472	1.21641	1.1459	1.77092	0.384384	0.762754	1.7123	3.86715
AGAP008149		protein phosphatase 1B (formerly 2C) [Source:VB Community Annotation]	D	2.65225	3.99291	1.60462	1.76632	0.1973	1.36297	0.360047	0.389861
AGAP005152		Unknown	D	1.61385	1.4556	0.912032	1.75926	0.103	0.358517	1.00987	1.20847
AGAP005413		survival of motor neuron protein-interacting protein 1 [Source:VB Community Annotation]	D	2.22902	3.13347	0.944814	1.74156	0	0.703717	0.517286	0.529099
AGAP008798		guanine nucleotide exchange factor MSS4 [Source:VB Community Annotation]	D	1.82912	2.86915	0.942458	1.7395	0.207688	0.518074	0.633978	0.289321
AGAP003997		casein kinase 1%2C gamma [Source:VB Community Annotation]	D	3.37935	1.43733	1.63912	1.73659	0.62774	1.24575	3.95689	5.91291
AGAP010139		GMP synthase (glutamine-hydrolysing) [Source:VB Community Annotation]	D	2.54464	3.775	1.66058	1.73414	0.299303	0.972294	2.319	4.75212
AGAP003826		proteasome assembly chaperone 2 [Source:VB Community Annotation]	D	1.74803	3.09415	0.993181	1.72522	0.0672035	0.303601	0.500212	0.347621
AGAP003229		SAP domain	D	1.00974	2.40546	0.740104	1.72199	0.108457	0.155512	0.151834	0.282275
AGAP003215		26S proteasome regulatory subunit T2 [Source:VB Community Annotation]	D	0.195708	2.34419	0.797503	1.72061	0.0855062	0.582709	0.133207	0
AGAP003133		E3 ubiquitin-protein ligase NEDD4 [Source:VB Community Annotation]	D	2.24265	3.00462	1.53436	1.71984	0.220332	0.1173	0.275324	1.00459
AGAP009329		bone morphogenetic protein receptor type-1B [Source:VB Community Annotation]	D	1.88271	1.48314	0.665043	1.71584	0	0	0.836644	1.43821
AGAP001041		E3 ubiquitin-protein ligase MARCH5 [Source:VB Community Annotation]	D	1.43657	2.36505	1.97516	1.71222	0.362024	0.676842	0.566673	0.921992
AGAP001461		JNK1/MAPK8-associated membrane protein [Source:VB Community Annotation]	D	0.372589	2.09385	2.01605	1.71065	0.0823195	0.496522	0.57035	1.44743
AGAP001997		interleukin enhancer-binding factor [Source:VB Community Annotation]	D	0.943837	2.83508	2.12088	1.70975	0.105092	0.550395	1.04404	0.578773
AGAP012042		TM DUF778	D	1.33588	2.28556	1.75214	1.70502	0	0.530546	0.871557	0.185296
AGAP001681		ubiquitin conjugation factor E4 A [Source:VB Community Annotation]	D	2.01105	2.41226	0.547155	1.69929	0.242741	0.364617	0.495402	0.96357
AGAP000255		disks large protein 1 [Source:VB Community Annotation]	D	1.68815	1.96731	1.74426	1.69686	0.557779	1.47222	3.35454	4.80057
AGAP000433		Ras-related protein Rab-39B [Source:VB Community Annotation]	D	1.50886	2.82211	1.48519	1.69267	0	0	0.128812	0.94678
AGAP000380		5'-nucleotidase [Source:VB Community Annotation]	D	1.85006	2.4136	1.61261	1.68915	0.27856	1.23525	1.298	2.02023
AGAP004234		BTB/POZ domain-containing protein [Source:VB Community Annotation]	D	1.15903	1.90994	1.61958	1.68062	0.619611	0.107137	0.466933	0.656971
AGAP002118		zinc finger protein 622 [Source:VB Community Annotation]	D	0.835032	2.80339	0.213008	1.68016	0.112389	0.655004	0	1.107
AGAP005143		E3 ubiquitin-protein ligase RNF144 [Source:VB Community Annotation]	D	0.892022	0.88395	1.05983	1.67461	0.317488	0.280048	1.49429	2.0871
AGAP006173		BTB/POZ domain-containing adapter for CUL3-mediated RhoA degradation protein [Source:VB Community Annotation]	D	1.77751	1.87745	1.05923	1.67116	0.350585	0.237888	0.877383	1.54717
AGAP008473		Unknown	D	2.41229	2.84202	2.15967	1.66932	0.90344	1.01807	1.00285	2.36306
AGAP002957		presenilin 1 [Source:VB Community Annotation]	D	0.889452	3.28598	1.89778	1.66444	0.361389	0.673858	1.62743	3.82133
AGAP013457		CDC-like kinase 2 [Source:VB Community Annotation]	D	1.28001	1.646	0.920351	1.66134	0.366455	0.568424	0.190494	1.43211
AGAP005556		Motile sperm domain-containing protein 2 [Source:VB Community Annotation]	D	2.16653	2.66168	1.60644	1.66061	0	0.638354	1.70007	4.12062
AGAP007256		Multiple epidermal growth factor-like domains 10 [Source:VB Community Annotation]	D	2.10868	3.97527	1.69873	1.6553	0.587005	0.864206	1.59498	2.37678
AGAP000127		zinc finger protein-like 1 homolog [Source:VB Community Annotation]	D	1.65272	2.45182	0.920125	1.6542	0	1.36867	0.779682	1.4397
AGAP007584		CAP domain	D	2.3601	2.2699	1.60186	1.65087	0.159728	1.00618	1.08385	2.51043
AGAP007954		RING finger protein 10 [Source:VB Community Annotation]	D	0.697753	2.33544	1.71373	1.65085	0.545265	0.495352	0.493318	1.12437
AGAP011893		Potentail helicase MOV-10 [Source:VB Community Annotation]	D	1.29891	2.13862	0.623426	1.64751	0.0840799	0.949705	0.406906	1.50806
AGAP002169		ubiquitin-conjugating enzyme E2 G2 [Source:VB Community Annotation]	D	3.61302	2.89771	1.02211	1.64491	0.291259	0.61271	1.43734	2.88511
AGAP009260		centrin-1 [Source:VB Community Annotation]	D	3.08848	1.18791	0	1.64462	0.31609	0.349094	1.14991	4.86162
AGAP003735		Unknown	D	2.57929	1.78229	2.59348	1.64424	0.499204	0.96236	2.49455	4.55055
AGAP003431		RUN and FYVE domain-containing 2 [Source:VB Community Annotation]	D	1.94861	1.62017	0.812232	1.64202	0.154502	0	1.81111	3.30635
AGAP007947		CHK kinase-like	D	3.12699	1.67638	3.2775	1.64076	0.426989	0.659956	0.701153	1.65844
AGAP002320		isochorismatase domain-containing protein [Source:VB Community Annotation]	D	0.943812	2.45573	2.57818	1.6309	0	0.274825	0.894287	0.551026
AGAP003525		CCR4-NOT transcription complex%2C subunit 2 [Source:VB Community Annotation]	D	1.16083	1.17982	2.36282	1.62627	0.138024	0.495467	0.427965	1.88277
AGAP004341		metastasis-associated protein MTA [Source:VB Community Annotation]	D	1.25359	1.29912	1.75804	1.62616	0.0752065	0.410156	2.53228	3.12337
AGAP000179		Amidophosphoribosyltransferase [Source:UniProtKB/TrEMBL%3BAcc:Q7QEW3]	D	1.64747	2.91196	2.46121	1.62468	0.175883	1.22941	0.900005	1.03719
AGAP000671		Ras-related protein Rab-10 [Source:VB Community Annotation]	D	0.934254	2.39109	0.794889	1.62463	0.492874	0.822026	0.526319	1.0537
AGAP012424	INR	insulin receptor [Source:VB Community Annotation]	D	3.86676	2.44773	2.81462	1.62435	0.271735	1.4788	1.30899	3.68634
AGAP005710		prominin-like protein [Source:VB Community Annotation]	D	3.06709	1.35935	0.872425	1.62046	0.432069	0.58566	2.68449	3.97399
AGAP008849		D-3-phosphoglycerate dehydrogenase [Source:VB Community Annotation]	D	2.24254	4.70232	1.53951	1.61827	0.504959	1.15401	0.768746	0.926855
AGAP008785		Ras suppressor protein 1 [Source:VB Community Annotation]	D	1.82581	2.31229	1.74244	1.61332	0	0.342632	0.447292	0.481438
AGAP012857		MutT domain protein-like protein [Source:VB Community Annotation]	D	1.13694	1.98475	1.49754	1.60587	0.199526	0.392125	0.33439	0
AGAP004678		Unknown	D	1.90471	3.45447	1.19233	1.60428	0.272109	0.506423	0.0850353	0.371836
AGAP011890		mitogen-activated protein kinase-activated protein kinase 2 [Source:VB Community Annotation]	D	1.19479	3.79835	0.566229	1.59943	0.0743041	0.469124	1.01664	3.60698
AGAP007167		Translocase of inner membrane 9b	D	1.52523	2.09744	1.54268	1.59827	0	0.479153	0.123398	0.799806
AGAP004211		Unknown	D	1.00358	1.71839	1.04694	1.59643	0.143248	0.606972	0.719907	0.451343
AGAP001102		C-myc promoter-binding protein [Source:VB Community Annotation]	D	2.26349	1.89303	1.47847	1.5955	0.241608	0.363756	1.61047	3.79688
AGAP004629		Calmodulin	D	3.38662	2.16085	1.61162	1.59491	0.422425	0.4622	2.6337	3.93859
AGAP011925		Patatin-like phospholipase domain containing 5 [Source:VB Community Annotation]	D	1.60691	1.89214	1.98972	1.59474	0.108942	0.290355	1.17958	3.16575
AGAP004737		Rhomboid-4%2C isoform B [Source:VB Community Annotation]	D	2.83833	0.650679	1.42865	1.59406	0.0957167	0.690431	0.46394	1.26836
AGAP010981		Zinc finger, C2H2	D	2.43398	1.02168	1.6769	1.58402	0.333401	1.31606	1.55677	3.46236
AGAP003490		alanine-glyoxylate aminotransferase [Source:VB Community Annotation]	D	1.02691	1.17131	1.25873	1.58208	0.53295	0.737275	0	0
AGAP012831		Unknown	D	0.664754	2.33556	0.839425	1.57655	0	0.351199	0.130079	0
AGAP002991		Ras-related GTP-binding protein A/B [Source:VB Community Annotation]	D	1.4407	3.28771	0.860168	1.57373	0.144264	0.36119	0.99596	1.65946
AGAP001871		Ro ribonucleoprotein autoantigen [Source:VB Community Annotation]	D	1.66501	2.00196	1.41785	1.573	0.241419	0.58005	0.747051	1.77559
AGAP001208		Small acidic protein-like domain	D	2.0465	3.05954	0.983667	1.569	0.573725	0.867598	1.94748	2.53848
AGAP003179		E3 ubiquitin-protein ligase synoviolin [Source:VB Community Annotation]	D	1.65085	2.8794	0.767428	1.56878	0	0.274539	0.161191	0.973436
AGAP006817		FACT complex subunit SPT16 [Source:VB Community Annotation]	D	1.95858	3.3027	0.943248	1.56242	0.139102	0.555457	1.4246	1.16265
AGAP000633		T-complex 11	D	1.85013	1.75232	1.98485	1.55888	0.2136	0.132209	0.800831	1.37548
AGAP001526		RIO kinase 2 [Source:VB Community Annotation]	D	1.95242	1.64556	0.868304	1.55669	0.230245	0.48143	0.655782	1.08431
AGAP011310		phosphatidylinositol glycan%2C class P [Source:VB Community Annotation]	D	1.64519	2.98711	1.85649	1.55543	0.090904	1.1268	0.145007	0.376422
AGAP002477		single-stranded DNA-binding protein%2C mitochondrial [Source:VB Community Annotation]	D	2.03821	3.46445	0.536151	1.55437	0.863665	0.354427	0.492479	1.73375
AGAP003142		sulfide:quinone oxidoreductase [Source:VB Community Annotation]	D	1.93413	1.63464	1.61837	1.553	0.29169	0.135886	1.30596	2.06773
AGAP003558		Zinc finger, RING-type	D	3.53956	3.26845	2.02018	1.55067	0.0899218	0.350553	0.113827	0.28334
AGAP001760		protein phosphatase 3%2C regulatory subunit [Source:VB Community Annotation]	D	3.46059	1.6527	1.66209	1.54872	0.0782869	1.02192	1.23575	2.83201
AGAP008635		protein SDA1 [Source:VB Community Annotation]	D	3.50898	3.34341	1.25822	1.5441	0.0961422	0.654772	0.372034	0.557406
AGAP000933	APG10	autophagy related gene [Source:VB Community Annotation]	D	1.34584	2.97488	1.58947	1.54278	0.0743035	0.246633	0.163834	0.484328
AGAP008827		Unknown	D	2.37405	1.20492	1.08456	1.54268	0	0.521048	0	0.180038
AGAP006270		fyn-related kinase [Source:VB Community Annotation]	D	1.55684	1.55623	1.05191	1.53968	0.127193	0.316515	1.97435	3.86084
AGAP001091		N-terminal kinase-like protein [Source:VB Community Annotation]	D	2.89845	2.62259	1.00752	1.53886	0.465953	1.29523	2.01696	3.09069
AGAP004391		N-acylneuraminate-9-phosphatase [Source:VB Community Annotation]	D	1.54153	1.94837	0.820185	1.53855	0.39223	0.586262	0.474233	1.00957
AGAP008497	APG4B	autophagy related gene [Source:VB Community Annotation]	D	2.13119	1.42005	1.27525	1.53737	0	0.331418	0.66434	0.729229
AGAP007247		hippocalcin-like protein 1 [Source:VB Community Annotation]	D	4.30192	1.66608	0.866482	1.53497	0.427811	0.715077	2.59065	4.16894
AGAP004502		Serine/threonine-protein phosphatase 2A 55 kDa regulatory subunit B alpha isoform [Source:VB Community Annotation]	D	2.27928	2.25068	0.673409	1.53438	0.0266917	0.714884	1.29851	4.48761
AGAP009117		calcium uptake protein 1%2C mitochondrial [Source:VB Community Annotation]	D	3.60442	3.0379	1.03848	1.53195	0.464338	0.362997	2.77205	5.02636
AGAP008375		mannose-P-dolichol utilization defect 1 [Source:VB Community Annotation]	D	0.702466	3.79008	1.40497	1.53103	0.114216	0.35568	0.345295	0.222994
AGAP007934		Transmembrane receptor	D	2.47727	4.76122	0.866537	1.52794	0.414341	0.526349	0.458098	4.05761
AGAP006629		regulator of G-protein signaling [Source:VB Community Annotation]	D	3.13954	2.05086	1.93823	1.52239	0.0979199	0.459773	1.42806	1.25582
AGAP010894		signal recognition particle receptor subunit alpha [Source:VB Community Annotation]	D	0.460872	2.04132	1.35195	1.52112	0.287114	0.396001	0.534211	0.952345
AGAP009439		membrane protein GNA1220 [Source:VB Community Annotation]	D	0.348377	2.17934	0.438318	1.52	0	0.263543	0.278448	0
AGAP003706		BolA protein [Source:VB Community Annotation]	D	0.326479	1.74177	0.306178	1.51851	0.281775	0.315237	0.232756	0.541409
AGAP007610		Unknown	D	1.93392	5.3419	2.21072	1.51844	0.0781883	0.67707	0.0825108	0.75798
AGAP006116		TBC1 domain family%2C member 8B (with GRAM domain) [Source:VB Community Annotation]	D	2.69127	1.59404	1.3622	1.51727	0.157202	0.501589	0.728411	1.87622
AGAP000317		Brother/Core binding factor, beta subunit/Runt and Lozenge cofactor	D	2.80674	1.57756	1.29668	1.51591	0.0774395	1.05713	1.42727	1.01929
AGAP000096		Unknown	D	1.01125	1.81283	0.669301	1.50865	0.351749	0.455214	2.22201	3.49844
AGAP013475		Peptidyl-prolyl cis-trans isomerase NIMA-interacting 1 [Source:VB Community Annotation]	D	0.611463	3.17875	0.73181	1.50773	0	0.169657	0.166495	0.256023
AGAP000615		Unknown	D	1.4627	3.01961	1.14771	1.50657	0.378065	0.716887	0.198267	0.257583
AGAP002047		atlastin [Source:VB Community Annotation]	D	2.64371	2.47517	1.05446	1.49882	0.297606	1.00891	1.55971	2.69923
AGAP010873		Cytosolic Fe-S cluster assembly factor NUBP2 homolog [Source:UniProtKB/Swiss-Prot%3BAcc:Q7QGS3]	D	1.1353	2.97636	1.08488	1.49608	0.391859	0.801864	0.391208	0.206554
AGAP001152		GPN-loop GTPase 3 [Source:VB Community Annotation]	D	1.08145	2.49469	1.29316	1.49508	0.118809	0.430895	0.610246	0.382862
AGAP012299		cyclin D2 [Source:VB Community Annotation]	D	1.30734	1.51588	1.76847	1.49315	0.159986	0.592441	0.942365	2.35151
AGAP007522		Adaptor-related protein complex 3%2C sigma 1 subunit [Source:VB Community Annotation]	D	3.14205	4.92842	1.99676	1.49287	0	0.244033	0.252992	0.273632
AGAP006193		E3 ligase	D	1.48492	3.3551	0.814778	1.49003	0.209479	0.17938	0.334994	0.836601
AGAP002215		Unknown	D	1.852	3.05051	0.923848	1.48899	0	0.748511	0.468462	1.4615
AGAP001802		mitofusin [Source:VB Community Annotation]	D	1.86572	1.56579	0.512178	1.4863	0.036929	0.489767	1.62103	1.33397
AGAP001420		2%2C3-bisphosphoglycerate-dependent phosphoglycerate mutase [Source:VB Community Annotation]	D	1.56728	2.0607	1.61721	1.4858	0.11477	0.935742	0.110196	0.58429
AGAP003815		very-long-chain (3R)-3-hydroxyacyl-(acyl-carrier protein) dehydratase [Source:VB Community Annotation]	D	1.54979	3.26889	1.43682	1.48546	0.11225	0.439176	0.882394	0.518504
AGAP012038		glutamate--cysteine ligase regulatory subunit [Source:VB Community Annotation]	D	0.435407	2.85922	1.33748	1.48152	0.297508	0.93466	0.851594	0.52205
AGAP002901		Protein unc-50 homolog [Source:VB Community Annotation]	D	1.01315	4.04879	2.40829	1.4795	0	0.444533	1.5275	2.22692
AGAP003517		phenylalanyl-tRNA synthetase beta chain [Source:VB Community Annotation]	D	0.751907	2.52838	1.15992	1.47885	0.160786	0.369653	0.19103	0.443543
AGAP003007		SURF6	D	0.376201	1.53638	0.263002	1.47694	0.354931	0.658861	0.222415	0
AGAP003160		MAP kinase interacting serine/threonine kinase [Source:VB Community Annotation]	D	1.40225	1.4465	2.67778	1.47399	0.225892	0.660627	0.69577	2.51612
AGAP002729		Ras GTPase-activating protein 1 [Source:VB Community Annotation]	D	1.87736	3.26249	1.51506	1.47362	0.143779	0.664272	1.16197	1.9279
AGAP004504		Unknown	D	3.25513	3.26634	1.02212	1.46585	0.204856	0.611222	2.14428	3.168
AGAP001279		protein phosphatase 3%2C catalytic subunit [Source:VB Community Annotation]	D	4.2138	3.74662	1.46598	1.46499	0.0245209	0.903316	0.970073	2.10153
AGAP005071		calcium release-activated calcium channel protein 1 [Source:VB Community Annotation]	D	1.72207	3.11357	1.28058	1.46479	0.0961193	0.553007	1.22943	1.37584
AGAP010728		Unknown	D	2.10019	1.53416	0.821859	1.46219	0.175446	0	1.06033	2.73533
AGAP007169		sestrin [Source:VB Community Annotation]	D	2.25165	1.68462	2.01824	1.46049	0	0.921323	1.49972	1.39596
AGAP010303		autophagy-related protein 7 [Source:VB Community Annotation]	D	2.09346	2.69438	0.991786	1.45806	0.22907	0.667662	0.974813	2.54813
AGAP005655	CYC	cycle [Source:VB Community Annotation]	D	1.69646	0.962986	1.29661	1.45599	0.147446	0.693579	0.482558	1.64107
AGAP009827		CCR4-NOT transcription complex subunit 4 [Source:VB Community Annotation]	D	1.71702	1.65217	1.19258	1.45582	0.155504	0.0999362	0.946093	1.53365
AGAP007623		CLIP-associating protein 1/2 [Source:VB Community Annotation]	D	2.67911	2.47263	1.47345	1.45503	0.354919	0.863057	2.47446	4.14114
AGAP013449		rhythmically expressed gene 2 protein [Source:VB Community Annotation]	D	2.33253	1.40176	1.12094	1.45349	0	0.0940988	0.21941	0.953189
AGAP007420		peptidylglycine monooxygenase [Source:VB Community Annotation]	D	2.84389	1.42651	1.052	1.4522	0.544601	0.0920731	1.76498	3.31109
AGAP008148		RING finger and SPRY domain-containing protein 1 [Source:VB Community Annotation]	D	1.22257	4.07976	1.40754	1.45035	0.332499	0.583467	0.698804	1.88485
AGAP011997		Cytosolic Fe-S cluster assembly factor NUBP1 homolog [Source:UniProtKB/Swiss-Prot%3BAcc:Q7PV10]	D	1.54104	2.67728	1.42934	1.44975	0.117923	0.973871	0.769977	0.761587
AGAP004050		Doublesex female isoform [Source:VB Community Annotation]	D	3.1743	1.17096	2.03096	1.44345	0.55015	0.905416	1.9293	3.98181
AGAP011962		Unknown	D	1.24566	3.40541	2.36626	1.44264	0.168641	0.71611	1.37005	2.13007
AGAP010312		keren [Source:VB Community Annotation]	D	1.19002	2.38508	1.41104	1.44177	0	0.63652	0.621604	1.24342
AGAP012095		Guanine nucleotide-binding protein G(s) subunit alpha [Source:UniProtKB/Swiss-Prot%3BAcc:Q7PD79]	D	1.63054	1.66089	0.593223	1.43852	0.107743	0.651769	0.377656	3.54687
AGAP008708		protein-tyrosine phosphatase [Source:VB Community Annotation]	D	1.64317	1.54234	0.576512	1.43345	0.291238	1.137	0.994387	0.933747
AGAP005548		alpha-crystallin B chain [Source:VB Community Annotation]	D	1.3351	0.641582	0.571508	1.42755	0.251406	0.960807	1.33682	2.23513
AGAP000771		Vacuolar-sorting protein SNF8 [Source:UniProtKB/TrEMBL%3BAcc:Q7QE89]	D	0.40656	2.23251	0.255917	1.42671	0.133808	0.193733	0.355687	0.960042
AGAP001490		26S proteasome non-ATPase regulatory subunit 5 [Source:VB Community Annotation]	D	0.809025	2.58035	0.31102	1.42588	0	0.197349	0.253386	0.493734
AGAP009132		CKLF-like MARVEL transmembrane domain-containing protein 4 [Source:VB Community Annotation]	D	1.54545	3.05926	1.35546	1.42327	0	0.557293	1.92656	3.43274
AGAP002686		5'-AMP-activated protein kinase%2C catalytic alpha subunit [Source:VB Community Annotation]	D	1.75645	1.70622	1.95344	1.42137	0.599957	1.24465	0.0744827	0.740825
AGAP003595		rRNA biogenesis protein RRP5 [Source:VB Community Annotation]	D	1.54642	1.86425	0.0749178	1.42115	0	0.235294	0.746468	2.01195
AGAP008476		Unknown	D	2.52635	2.31951	0.68457	1.41697	0.336829	0.155354	0.60918	0.634583
AGAP006460		Nucleotide-binding alpha-beta plait domain	D	1.45659	1.62785	0.999413	1.40944	0.68653	0.545156	0.609575	2.45881
AGAP007381		Unknown	D	1.27272	3.59503	0.6518	1.40706	0.152205	0.224447	0.253478	0.841187
AGAP002073		E3 ubiquitin-protein ligase RNF1/2 [Source:VB Community Annotation]	D	0	2.1931	0.246576	1.40297	0	0.436015	0.0816245	0.473543
AGAP000310		mitogen-activated protein kinase kinase 3 [Source:VB Community Annotation]	D	1.3055	2.59273	1.30915	1.40061	0.143206	0.30741	0	0
AGAP002183		Signal recognition particle subunit SRP68 [Source:UniProtKB/TrEMBL%3BAcc:Q7QK73]	D	1.29299	2.79907	0.528106	1.40011	0	0.374661	0.0730327	0
AGAP007847		dual specificity tyrosine-phosphorylation-regulated kinase [Source:VB Community Annotation]	D	2.61597	1.48566	1.63455	1.39883	0	0.278902	1.46771	4.89341
AGAP002114		cell division cycle 20-like protein 1%2C cofactor of APC complex [Source:VB Community Annotation]	D	0.821099	0.721996	0.375765	1.39817	0	0.297537	0.551923	1.28382
AGAP000286		Unknown	D	1.43907	2.00747	2.1169	1.39806	0.0585786	0.605835	0.521329	0.143275
AGAP008813		FMS-like tyrosine kinase 1 [Source:VB Community Annotation]	D	2.91128	2.63307	1.10402	1.39677	0.507607	0.623478	1.49525	3.97643
AGAP008863		protein kinase%2C cGMP-dependent [Source:VB Community Annotation]	D	2.93217	2.36668	1.01173	1.38934	0.112377	0.826876	1.79637	1.8746
AGAP007726		ArfGAP with SH3 domain%2C ankyrin repeat and PH domain 2 [Source:VB Community Annotation]	D	3.42437	1.83133	2.04118	1.38839	0.302603	0.525589	1.53584	5.44955
AGAP002149		Unknown	D	2.93311	2.27691	1.49241	1.38688	0.194306	1.128	1.52781	1.8665
AGAP005617		Rho GTPase activation protein	D	1.94677	1.5336	1.34791	1.38624	0.489139	1.29068	1.80531	2.21716
AGAP002091		phosphoribosylformylglycinamidine synthase [Source:VB Community Annotation]	D	0.554702	1.22438	0.944215	1.3855	0.399688	0.277617	0.538474	1.91663
AGAP005910	APG18B	autophagy related gene [Source:VB Community Annotation]	D	1.41433	2.30993	1.55437	1.38385	0.37457	1.02814	1.09247	3.27975
AGAP001007		Unknown	D	0	1.71069	0.296657	1.37753	0	0.305834	0.198143	0.218121
AGAP010029		transmembrane 9 superfamily member 2/4 [Source:VB Community Annotation]	D	0.664687	4.12712	1.07394	1.37505	0	0.134202	1.23906	3.80522
AGAP005364		protein BAT5 [Source:VB Community Annotation]	D	1.00136	1.1737	1.64753	1.37278	0.0938704	0.609848	1.3336	1.67309
AGAP013026		nucleolar protein 4	D	1.34575	0.415711	0.531602	1.37013	0	0.129288	0	0.236336
AGAP009643		diaphanous	D	1.59795	1.57592	1.65005	1.36927	0.204122	0.196865	0.409268	0.728814
AGAP002913		C-terminal putative kinase domain of FAM20 (family with sequence similarity 20) proteins	D	2.49468	1.37084	1.85636	1.36884	0	0.278855	0.335762	0.223359
AGAP001083		Unknown	D	1.24428	2.57732	1.92599	1.36709	0.220307	0.491757	0.260979	0
AGAP002730		iron-sulfur cluster assembly protein [Source:VB Community Annotation]	D	3.61274	1.34236	1.4494	1.36683	0	0.223197	0.435927	0.244426
AGAP000784		abhydrolase domain containing 4 [Source:VB Community Annotation]	D	2.38336	4.16766	2.17756	1.36468	0.317513	0.72432	0.637005	0.808589
AGAP005435		Iodotyrosine dehalogenase [Source:VB Community Annotation]	D	2.49187	0.771881	1.75979	1.36209	0.128984	0.19092	0.316078	0.464614
AGAP004521		SNW domain-containing protein 1 [Source:VB Community Annotation]	D	2.18507	2.90145	1.19695	1.35729	0.317741	0.623889	1.53002	1.98821
AGAP003688		threonine aldolase [Source:VB Community Annotation]	D	1.36314	1.75724	1.75081	1.35448	0.10425	0.288101	0.873022	1.29754
AGAP002378		Adenylosuccinate lyase [Source:UniProtKB/TrEMBL%3BAcc:Q7QBZ6]	D	1.10757	2.63087	0.505448	1.35103	0.133825	0.785535	0.377041	0.575183
AGAP009992		inhibitor of growth protein 4 [Source:VB Community Annotation]	D	1.4196	2.22346	0.736258	1.34947	0.383959	0	1.47948	2.36148
AGAP005300		nuclear factor erythroid 2%2C invertebrate [Source:VB Community Annotation]	D	2.13989	1.91637	0.675998	1.34881	0.0888038	0.694935	0.696525	1.88036
AGAP013467		Protein kinase-like domain	D	2.16671	1.89879	1.73418	1.3445	0.132678	0.438353	0.272581	1.05065
AGAP002496		Von Hippel-Lindau disease tumor suppressor [Source:VB Community Annotation]	D	1.94117	1.53339	0.737922	1.3443	0	0.615421	0.249708	1.30837
AGAP003999		Unknown	D	3.2917	0.750246	1.59827	1.34394	0	0.250087	1.03806	2.97222
AGAP002285		Unknown	D	0.695895	2.17679	0.890442	1.34178	0	0.191734	0.353689	0.220771
AGAP008774		Unknown	D	0	3.2952	0.467865	1.34084	0	0.332981	0.697943	0.526905
AGAP001529		H/ACA ribonucleoprotein complex subunit [Source:UniProtKB/TrEMBL%3BAcc:Q7PXR0]	D	0.45266	2.66237	0.563285	1.34066	0	1.03298	0.179196	0
AGAP010551		STE20-like kinase [Source:VB Community Annotation]	D	2.31068	1.53279	0.779741	1.34031	0.346781	0.84855	1.48687	3.06177
AGAP005976		Unknown	D	2.45114	2.60366	0.670449	1.3398	0.416449	0.594196	1.45137	5.0895
AGAP009304		metallophosphoesterase 1 [Source:VB Community Annotation]	D	0	2.58681	1.85639	1.33542	0	0.453922	0.311906	0.3341
AGAP002876		single-strand selective monofunctional uracil DNA glycosylase [Source:VB Community Annotation]	D	0.694932	1.09296	0.27625	1.33462	0	0.206481	0.261556	0.62406
AGAP001051		Golgi Kinase	D	2.1269	1.39267	0.608845	1.33438	0	0.246548	0.125488	0.744504
AGAP002078		14 kDa phosphohistidine phosphatase [Source:VB Community Annotation]	D	0.459845	1.63782	0.490436	1.33373	0.179896	0.694531	0.306933	1.4826
AGAP001314		Sde2	D	1.52557	1.95805	1.48501	1.33208	0.168398	0.660804	0.850845	2.41094
AGAP013244		adenosine deaminase%2C tRNA-specific 2%2C TAD2 homolog [Source:VB Community Annotation]	D	0.645058	1.11245	0.27691	1.32934	0	0.678417	0.134636	0.272423
AGAP000747		mitogen-activated protein kinase kinase kinase 5 [Source:VB Community Annotation]	D	1.49591	1.2557	0.756805	1.32807	0.143384	0.406931	0.627085	0.975105
AGAP001747		Ubiquitin domain-containing protein [Source:VB Community Annotation]	D	2.46441	2.80605	0.78263	1.32163	0.512756	1.63488	0.668683	1.42489
AGAP009993		RIO kinase 3 [Source:VB Community Annotation]	D	0.545332	1.33201	0.471205	1.31984	0	0	0.746287	0.377243
AGAP003324		NAD(P)H-hydrate epimerase [Source:UniProtKB/Swiss-Prot%3BAcc:Q7Q0G5]	D	0	1.03742	0.248147	1.31939	0	0.439843	0.891236	1.3144
AGAP001729		protein farnesyltransferase subunit beta [Source:VB Community Annotation]	D	0.842535	1.75337	0.726644	1.31876	0.188127	0.215724	0.649775	1.44625
AGAP007884		protein dpy-30 [Source:VB Community Annotation]	D	0.310615	1.17849	0.429925	1.31707	0.173902	0.322785	0.136568	0
AGAP009057		CCR4-NOT transcription complex%2C subunit 1 [Source:VB Community Annotation]	D	1.42522	2.25075	2.48878	1.31431	0.615422	0.845481	0.682359	2.20741
AGAP007175		Phosphatidate cytidylyltransferase [Source:UniProtKB/TrEMBL%3BAcc:Q7QJ08]	D	1.5739	0.849141	0.730123	1.31426	0	0	1.0331	3.80418
AGAP010716		HIG1 hypoxia inducible domain family%2C member 1B [Source:VB Community Annotation]	D	0.997472	3.34192	1.86835	1.31421	0	1.29637	0.577748	1.62866
AGAP008746		Protein bem46 [Source:VB Community Annotation]	D	1.07808	2.27201	0.210398	1.31269	0	0.0510642	0.998287	1.63856
AGAP003622		Queuine tRNA-ribosyltransferase catalytic subunit 1 [Source:UniProtKB/TrEMBL%3BAcc:Q7QAM7]	D	0.734161	2.71993	0.424374	1.31255	0.0870195	0.136672	0.211354	0
AGAP008542		abhydrolase domain-containing protein 2 [Source:VB Community Annotation]	D	1.89301	2.88741	0.462675	1.31224	0.0735357	0.286134	1.20055	1.05733
AGAP003561		Znf_RING	D	2.49462	2.58639	2.41181	1.30955	0.435811	0.54726	0.496517	1.06244
AGAP005267		ADP-ribosylation factor-like protein 2 [Source:VB Community Annotation]	D	2.36651	1.61397	0.833943	1.30772	0.263838	0.50484	0.120973	0.734351
AGAP000556		selenoprotein W-related protein [Source:VB Community Annotation]	D	0.406496	1.85572	0.908145	1.3053	0	0.774282	0.215613	0.295299
AGAP009189		Unknown	D	1.56115	2.39836	1.28214	1.30242	0.159969	0.502949	1.81281	3.16436
AGAP009237		apoptotic chromatin condensation inducer in the nucleus [Source:VB Community Annotation]	D	1.43349	1.10872	0.83222	1.3011	0.673925	0.268249	0.294395	0.214469
AGAP000809		Proteasome 26S non-ATPase subunit 10 [Source:VB Community Annotation]	D	0.409759	2.90865	1.13983	1.30022	0.213799	0.200453	0.207816	0.195821
AGAP003779		serine/threonine-protein phosphatase 4 catalytic subunit [Source:VB Community Annotation]	D	2.92163	2.69264	0.706839	1.29847	0	0.424715	1.08585	2.15611
AGAP012563		Unknown	D	1.38215	1.90125	1.16457	1.2984	0	0.439065	0.195856	0.909422
AGAP008412		ubiquitin thioesterase CYLD [Source:VB Community Annotation]	D	1.95704	2.59901	1.58954	1.29786	0.597958	1.35405	1.26591	2.72362
AGAP002424		Sema domain%2C seven thrombospondin repeats (type 1 and type 1-like) [Source:VB Community Annotation]	D	1.39978	2.31674	0.969008	1.29617	0.384273	1.33926	1.96167	2.83379
AGAP004853		Ral GEF with PH domain and SH3-binding motif 1 [Source:VB Community Annotation]	D	1.86844	0.967864	0.311637	1.29616	0	0.711657	0.168573	0.887898
AGAP007587		protein kinase N [Source:VB Community Annotation]	D	0.825495	0.76197	0.316032	1.29375	0	0.474372	1.4409	1.82082
AGAP000631		integrator complex subunit 6 [Source:VB Community Annotation]	D	0.74526	1.5287	0.596442	1.29303	0.0329948	0.304565	0.511176	1.06768
AGAP004236		metallo-beta-lactamase superfamily	D	1.77163	2.81456	1.39412	1.29215	0	0.240528	0.108433	0.459284
AGAP008887		hepatocyte growth factor-regulated tyrosine kinase substrate [Source:VB Community Annotation]	D	2.52932	1.85241	0.287304	1.29198	0	0.233305	1.20951	0.727561
AGAP008041		RING finger protein 121 [Source:VB Community Annotation]	D	1.81879	1.83365	0.674811	1.2899	0.26053	0.268701	1.98222	3.66664
AGAP011338		peptide-O-fucosyltransferase [Source:VB Community Annotation]	D	1.52259	2.39119	1.81147	1.28865	0	0.356359	0.57554	0.856883
AGAP007204		E3 ubiquitin-protein ligase MARCH6 [Source:VB Community Annotation]	D	0.618284	1.58886	0.584337	1.2838	0	0.155683	0.192753	0.229225
AGAP005953		calcium homeostasis endoplasmic reticulum protein [Source:VB Community Annotation]	D	0.589642	1.59899	0	1.28228	0.249088	0.796551	0.372661	1.6476
AGAP009958		arginine and glutamate-rich protein 1 [Source:VB Community Annotation]	D	2.95732	2.67281	1.84239	1.28202	0.208667	0.720598	0.43345	1.07948
AGAP005609		ADP-ribosylation factor GTPase-activating protein 2/3 [Source:VB Community Annotation]	D	1.05183	2.70637	0.095414	1.2816	0.0581771	0.362173	0.439984	1.65679
AGAP004885		CDGSH iron sulfur domain-containing protein 3%2C mitochondrial [Source:VB Community Annotation]	D	3.77962	2.32448	1.00023	1.28143	0.246282	0.616002	1.53372	2.7791
AGAP012521		Rab GTPase binding	D	3.80967	2.25139	1.73317	1.28139	0.220804	1.06536	1.13587	2.32571
AGAP012499		polo-like kinase 4 [Source:VB Community Annotation]	D	2.51844	1.38254	0.31895	1.28109	0	0.560771	3.60048	4.55487
AGAP000545		von Wildebrand factor A - domain containing	D	1.0547	1.70664	0.561635	1.27477	0.11222	0.726534	0.249524	1.30508
AGAP012332		Differentially expressed in FDCP 6-like protein [Source:VB Community Annotation]	D	0.872728	2.98292	1.20319	1.27467	0.356382	0.731715	0.251394	0.265951
AGAP010220		Proliferating cell nuclear antigen [Source:UniProtKB/TrEMBL%3BAcc:Q7Q0Q0]	D	1.65056	4.64774	0.32606	1.26766	0	0.450995	0.427674	1.95134
AGAP012008		Unknown	D	0.936834	2.41612	1.21803	1.26571	0	0.409279	0.335134	1.40506
AGAP010565		prohibitin 1	D	2.30462	1.99938	1.14162	1.26368	0	0.427397	1.24193	1.63277
AGAP010954		Unknown	D	0.505873	1.13539	0.24955	1.26328	0	0.212426	0.341038	0
AGAP012622		peroxisomal membrane protein	D	1.13225	0.857468	0.393453	1.25833	0.165056	0.625311	0.858426	1.02097
AGAP010135		NCK adaptor protein [Source:VB Community Annotation]	D	1.51101	1.37893	0.325735	1.25635	0	1.15963	1.08634	3.77136
AGAP011762		Unknown	D	0.750344	1.43761	1.53112	1.25498	0.127147	0.758521	0	0.53877
AGAP002597		proteasome activator subunit 4 [Source:VB Community Annotation]	D	1.22618	1.73993	0.733864	1.25454	0.803052	0.480164	1.03449	1.85051
AGAP007306		MOB1%2C Mps One Binder kinase activator-like 3 (yeast) [Source:VB Community Annotation]	D	1.74855	2.23305	1.17906	1.25383	0.198355	0.676969	1.7936	3.07005
AGAP009841		chromodomain-helicase-DNA-binding protein 1	D	0.781338	2.14119	0.508485	1.25124	0.216391	0.367601	0.575177	0.729123
AGAP004273		Synapse-associated protein [Source:VB Community Annotation]	D	2.21272	1.54979	0.534434	1.25095	0.401306	0.57729	2.55947	5.45818
AGAP005018		LysM domain	D	2.68328	1.85303	0.173689	1.24644	0	0	0.220478	0.200291
AGAP004232		pellino [Source:VB Community Annotation]	D	3.54084	0.585701	3.25163	1.24144	0.481599	0.973494	3.26852	5.77064
AGAP010690		Unknown	D	0.999647	1.85919	0.259967	1.24086	0.0929842	0.123093	0.434216	1.8948
AGAP000552		TBC domain-containing protein kinase-like protein [Source:VB Community Annotation]	D	1.8658	1.14092	0.776588	1.23411	0	0.0231505	1.00254	1.10116
AGAP010566		ORM1-like 3 [Source:VB Community Annotation]	D	3.96367	1.72592	0.261097	1.23137	0.123269	0.448725	0.941244	2.49883
AGAP011422		carboxy-terminal domain RNA polymerase II polypeptide A small phosphatase [Source:VB Community Annotation]	D	1.35814	3.87335	2.05958	1.23097	0	0.556126	0.389759	1.44656
AGAP012088		stromal membrane-associated protein [Source:VB Community Annotation]	D	1.67043	2.11405	1.18502	1.2283	0	0.563405	0.113825	0.275852
AGAP001786		AT-rich interactive domain-containing protein 1 [Source:VB Community Annotation]	D	2.13052	1.55179	1.14179	1.22792	0.22333	0.531141	0.897142	1.8421
AGAP005978		zinc finger and SCAN domain containing 2 [Source:VB Community Annotation]	D	3.22119	1.86527	0.774508	1.21686	0.0977289	0.799545	2.53838	3.70678
AGAP001307		ubiquitin fusion degradation protein 1 [Source:VB Community Annotation]	D	2.05379	2.61748	0.925059	1.21428	0	0	1.16624	1.82996
AGAP011883		Unknown	D	1.42551	1.55122	0.78932	1.21076	0	0.375586	0	0.350066
AGAP001888		Alpha-(1%2C6)-fucosyltransferase [Source:UniProtKB/TrEMBL%3BAcc:Q7PYD8]	D	1.73451	2.63631	0.569991	1.20932	0	0.0906663	0.251567	0.642842
AGAP003440		Alpha/beta hydrolase family	D	0.520934	0.183677	0.51465	1.20868	0	0.761215	0.274784	1.08043
AGAP008384		pdz domain protein arc	D	1.13763	0.858093	0.0553288	1.20846	0.446034	0.644042	0.810884	1.57388
AGAP007896		predicted G-protein coupled receptor GPCR [Source:VB Community Annotation]	D	0.4164	1.12113	0.318345	1.20579	0.217837	0.298273	1.43802	1.73244
AGAP002385	Trs33	trafficking protein particle complex subunit 6 [Source:VB Community Annotation]	D	2.00273	2.06599	1.31942	1.20501	0.22256	1.14875	0.226377	1.27675
AGAP011474		ubiquitin-protein ligase E3 C [Source:VB Community Annotation]	D	2.21725	1.8623	1.45343	1.20496	0	0.264456	0.494782	1.12919
AGAP003114		protein phosphatase 1%2C catalytic subunit [Source:VB Community Annotation]	D	1.7719	1.20576	0.604694	1.19986	0.341743	0.394594	2.1061	3.49736
AGAP007576		Unknown	D	0.712048	0.91524	0.532226	1.1971	0	0	0.720187	1.03274
AGAP010622		Era G-protein-like 1 [Source:VB Community Annotation]	D	1.60473	2.03625	0.902101	1.19695	0.218419	0.0967299	0.779006	1.77901
AGAP008494		signal transducing adaptor molecule [Source:VB Community Annotation]	D	2.40077	3.39988	0.785345	1.19677	0	0.570241	0.713898	2.30133
AGAP012044		tetratricopeptide repeat protein 4 [Source:VB Community Annotation]	D	0.345598	2.4727	0	1.19515	0.221536	0.335092	1.14901	2.05999
AGAP012413	CycA	cyclin A [Source:VB Community Annotation]	D	3.97098	3.85844	1.04085	1.19397	0	0.814495	0.842271	2.53255
AGAP008749		ER degradation enhancer%2C mannosidase alpha-like 3 [Source:VB Community Annotation]	D	2.18796	1.52833	1.2081	1.18817	0.247303	0.219003	0.944217	1.68697
AGAP000787		E3 ubiquitin-protein ligase NEDD4 [Source:VB Community Annotation]	D	1.66841	1.93361	1.51811	1.18636	0.232519	1.09896	3.28001	4.35832
AGAP001140		Without children	D	2.15886	1.0202	0.806269	1.18386	0.157768	0.505894	2.29429	2.49687
AGAP009891		juvenile hormone esterase binding protein [Source:VB Community Annotation]	D	1.06949	1.54242	1.37953	1.18215	0	0.21181	0.74455	1.42986
AGAP003618		serine/threonine-protein kinase LATS1/2 [Source:VB Community Annotation]	D	1.92736	1.79914	0.595022	1.18107	0	0.439278	0.711685	1.13321
AGAP000029		E1A/CREB-binding protein [Source:VB Community Annotation]	D	0.979636	0.6893	1.01852	1.17883	0.524523	1.052	0.406797	1.02553
AGAP007853		zinc finger HIT domain-containing protein 1 [Source:VB Community Annotation]	D	1.31901	2.54027	0.896236	1.17679	0.495316	0.301621	1.43468	2.34779
AGAP009818		methyltransferase-like protein 6 [Source:VB Community Annotation]	D	0.444194	0.87145	1.18272	1.17663	0.084658	0	0.644878	1.15667
AGAP003824		conserved oligomeric Golgi complex subunit 2 [Source:VB Community Annotation]	D	0.651482	2.32553	2.43905	1.17579	0.24088	0.60402	0.440345	1.52466
AGAP001639		polyA-binding protein interacting protein [Source:VB Community Annotation]	D	2.12162	0.389811	2.15382	1.17462	0	0.0662007	0.118232	1.93901
AGAP009020		Cyclin PHO80-like	D	1.63373	1.83019	0.872399	1.17402	0.0957826	0.995103	0.673661	2.03975
AGAP007892		paired amphipathic helix protein Sin3a [Source:VB Community Annotation]	D	2.81919	1.16762	0.697399	1.17394	0.160975	1.04569	2.27179	4.20979
AGAP006689		BTB (POZ) domain containing 9 [Source:VB Community Annotation]	D	1.34391	1.69048	0.800387	1.17194	0	0.268463	0.49783	1.9654
AGAP008037		KDEL (Lys-Asp-Glu-Leu) containing 1%2C isoform CRA_a [Source:VB Community Annotation]	D	0.91905	1.42034	0.622197	1.16966	0	0.21222	0.289447	1.5048
AGAP001501		Regucalcin protein [Source:VB Community Annotation]	D	2.54173	2.79254	1.02349	1.16855	0.275926	0.639455	1.04645	1.61233
AGAP007213		mitogen-activated protein-binding protein-interacting protein [Source:VB Community Annotation]	D	1.89593	1.85123	0.466061	1.16818	0	0.163776	0.905019	1.48936
AGAP002498		Vam6/Vps39-like protein isoform 1 [Source:VB Community Annotation]	D	1.4536	2.04044	0.339058	1.16717	0.426276	0.0937683	1.06703	1.98042
AGAP003301		M-phase inducer phosphatase [Source:VB Community Annotation]	D	1.89328	1.02923	0.606551	1.1657	0.372661	0.407094	1.49348	1.7718
AGAP003537		Cys2His2 zinc finger developmental/cell cycle regulator%2C other [Source:VB Community Annotation]	D	1.26787	0.407535	0.483305	1.16439	0.328567	0.252544	0.523851	4.15544
AGAP009893		nocturnin [Source:VB Community Annotation]	D	1.34997	1.33216	0.877879	1.16191	0	0.905538	0.321635	1.47562
AGAP003701		zinc finger protein 593 homolog [Source:VB Community Annotation]	D	0.334472	1.62996	0.393209	1.16081	0.262756	0.377346	0.291858	0.465924
AGAP012437		nuclear factor related to kappa-B-binding protein	D	1.66342	1.13739	0.577833	1.15975	0	0.356302	0.33337	2.18866
AGAP007392		peptidyl-prolyl isomerase H (cyclophilin H) [Source:VB Community Annotation]	D	3.767	3.58263	1.76733	1.15782	0	0.15215	1.12929	2.18569
AGAP002536		Unknown	D	1.57647	2.9631	0.37935	1.15727	0	0.698879	1.16096	3.45281
AGAP008851		E3 ubiquitin-protein ligase mind-bomb [Source:VB Community Annotation]	D	0.670028	1.6739	0.446376	1.15301	0.273202	0.545542	0.898485	1.39093
AGAP010402		abhydrolase domain-containing protein FAM108B1 [Source:VB Community Annotation]	D	1.20049	0.982756	0.796338	1.15116	0	0.372921	0.710567	0.763133
AGAP009843		Unknown	D	0.753458	1.31925	1.23652	1.14889	0.152653	0	0.30092	0.277349
AGAP010292		guanine nucleotide exchange factor VAV [Source:VB Community Annotation]	D	1.59861	2.67608	0.447747	1.14593	0	0.625201	0.265152	1.80239
AGAP008330		guanine nucleotide-binding protein-like 1 [Source:VB Community Annotation]	D	2.20514	2.81291	1.04787	1.14513	0	0.223792	0.668176	1.54792
AGAP004689		Plexin-like fold	D	2.16705	2.95391	1.20015	1.14225	0.0704257	0.822418	0	0.668295
AGAP008983		Unknown	D	0.40427	1.16977	0.775157	1.14163	0.46118	0.303238	0.883459	0.719626
AGAP011060		calcium binding protein 39 [Source:VB Community Annotation]	D	1.72221	1.85709	1.2144	1.13139	0	0.66114	0	0.624149
AGAP008337		Spo0B-associated GTP-binding protein [Source:VB Community Annotation]	D	0.816805	1.05512	0	1.13032	0.238908	0.547952	1.63558	1.10524
AGAP009066	ush	ushaped	D	1.43873	1.11387	0.96772	1.13002	0.166402	0.22424	0.458303	0.764186
AGAP004641		ATP synthase mitochondrial F1 complex assembly factor 1 [Source:VB Community Annotation]	D	0.936825	2.59168	1.45119	1.12407	0.207474	0.915852	1.03011	0
AGAP002315	APG16L	autophagy related gene [Source:VB Community Annotation]	D	2.14945	2.07685	0.482924	1.12297	0.358483	0.384278	1.1594	2.39646
AGAP003678	LST2	lateral signalling target protein 2 [Source:VB Community Annotation]	D	1.10842	1.51706	1.28235	1.12142	0.33973	1.17008	1.61507	1.69293
AGAP005199		Ubiquinone biosynthesis protein COQ4 homolog%2C mitochondrial [Source:UniProtKB/Swiss-Prot%3BAcc:Q7Q9J8]	D	2.26309	2.61151	1.63817	1.11995	0.24049	0.549268	1.10829	1.35367
AGAP000847		CDC-like kinase [Source:VB Community Annotation]	D	1.79916	1.63931	1.43133	1.11658	0.386371	0.551118	1.33004	2.95036
AGAP011358		Unknown	D	0.154702	2.60365	0.25766	1.11539	0	0.274178	0	0.625182
AGAP006231		serine/threonine-protein phosphatase dullard homolog [Source:VB Community Annotation]	D	1.30996	0.913895	1.07526	1.11026	0.289141	0.206787	0.530122	2.46666
AGAP003193		GPN-loop GTPase [Source:VB Community Annotation]	D	1.08862	0.795141	0.866205	1.10781	0	0.217068	0.127123	1.13686
AGAP005102	APG7B	autophagy related gene [Source:VB Community Annotation]	D	1.5733	2.15583	0.492631	1.10721	0	0	0.417529	1.06709
AGAP001905		zinc finger RNA-binding protein [Source:VB Community Annotation]	D	1.91582	2.6405	1.61202	1.10477	0.354542	0.607868	1.00796	3.13211
AGAP000452		Unknown	D	2.17806	1.75321	1.33974	1.10468	0.535148	0.65539	1.24592	1.66214
AGAP008312		Unknown	D	1.42817	1.23407	0.304088	1.10237	0.37126	0.385634	0.838799	0.805667
AGAP012773		Unknown	D	0.87194	1.10535	0.383259	1.10209	0	0.311668	0.132517	0.75374
AGAP006391		UBX domain protein 6 [Source:VB Community Annotation]	D	0.765707	2.00247	0.418112	1.10138	0	0.144433	0.722065	0.713489
AGAP004507		Dedicator of cytokinesis [Source:VB Community Annotation]	D	2.36201	2.08105	0.360959	1.09705	0.250379	0.849405	1.37031	3.3737
AGAP003174		Unknown	D	1.43434	1.19418	0.503404	1.09423	0.104273	0.23882	2.07928	3.84254
AGAP002952		peptidyl-prolyl isomerase G (cyclophilin G) [Source:VB Community Annotation]	D	1.6619	2.41586	0.868001	1.09142	0	0.625596	0.848897	2.44911
AGAP007751		Unknown	D	1.84854	1.47272	0.681415	1.0874	0.349493	0.274081	1.34804	4.32163
AGAP001141		Unknown	D	2.71776	1.88877	0.35	1.0858	0.0708606	0.47812	1.46505	2.69294
AGAP005400		four and a half LIM domains [Source:VB Community Annotation]	D	3.50635	2.52953	1.35879	1.08517	0.30693	0.658371	1.93228	4.03954
AGAP011691		Unknown	D	0.933825	1.20819	1.82686	1.0844	0.0800846	0.256227	1.26438	2.31027
AGAP000841		Ras-related protein Rab-40 [Source:VB Community Annotation]	D	1.95677	2.28786	1.58101	1.08318	0	0.0899521	0.914912	2.11548
AGAP010767		Unknown	D	1.47364	1.73691	1.85981	1.08109	0.798488	1.72013	1.83159	2.58424
AGAP005429	Thoc6	THO complex subunit 6 [Source:VB Community Annotation]	D	0.599654	0.977568	0	1.08062	0	0.0990552	0.113956	0.750347
AGAP028730		ankyrin [Source:VB Community Annotation]	D	4.26746	1.98909	1.54336	1.08061	0.266017	0.887653	2.65427	5.25632
AGAP005547		alpha-crystallin B chain [Source:VB Community Annotation]	D	0.300564	0.31586	0.437353	1.08061	0.175983	1.01253	0.756543	0.932267
AGAP004938		zinc finger%2C DHHC-type containing 15 [Source:VB Community Annotation]	D	3.80843	3.18902	1.26456	1.07324	0.186873	0.437068	0.712142	3.40833
AGAP003580		Unknown	D	1.64965	0.0808553	0.224416	1.06951	0.524123	0.814171	0.906134	1.48681
AGAP010273		phosphatidylinositol 3-kinase [Source:VB Community Annotation]	D	2.85849	2.1424	0	1.06923	0.0475215	0.429708	2.21427	2.9026
AGAP008049		cell division cycle 123 homolog [Source:VB Community Annotation]	D	1.03424	2.70027	1.76135	1.06913	0	0.54468	0.544192	0.921723
AGAP005631		pleiotropic regulator 1 [Source:VB Community Annotation]	D	0.95253	0.801827	0.22703	1.06881	0	0	0.227076	0.173653
AGAP000598		scaffold protein Nfu/NifU [Source:VB Community Annotation]	D	2.11571	1.63451	0.47405	1.06873	0	0.20872	0.391123	0.238506
AGAP005190		protein KTI12 [Source:VB Community Annotation]	D	0.279764	1.01064	0.883909	1.06704	0	0	0.445886	1.69361
AGAP007500		lachesin [Source:VB Community Annotation]	D	2.56258	2.78966	0.302229	1.06552	0	0.265267	2.00245	3.4089
AGAP000653		xenotropic and polytropic retrovirus receptor 1 [Source:VB Community Annotation]	D	1.76738	1.0412	0.916506	1.06547	0.242644	0.17879	0.739111	2.74034
AGAP008896		dynamin 1-like protein [Source:VB Community Annotation]	D	0.730549	1.48938	0.147854	1.06408	0	0.195895	0.612758	1.30578
AGAP001322		Unknown	D	0.902035	2.33468	0.46471	1.06365	0	0.614217	0.567601	1.57182
AGAP004405		glucose-repressible alcohol dehydrogenase transcriptional effector homolog [Source:VB Community Annotation]	D	0.988905	1.34089	0.611083	1.0633	0.0977162	0.667286	1.23548	3.38613
AGAP006784		F-box protein 9 [Source:VB Community Annotation]	D	1.75628	2.04086	0.263576	1.05506	0	0.354218	0.803074	0.689909
AGAP001573		Ras-related C3 botulinum toxin substrate 1 [Source:VB Community Annotation]	D	3.27291	1.71118	0.888945	1.05499	0.178497	1.43384	0.701346	1.54184
AGAP007939		starch phosphorylase [Source:VB Community Annotation]	D	0.432648	0.924378	1.80111	1.05108	0	0.81805	0.708878	1.05894
AGAP009822		DNA-binding protein rfxank [Source:VB Community Annotation]	D	0.900465	0.344502	0.785481	1.0494	0	0.373304	0.611168	1.15974
AGAP004329		Unknown	D	0.307251	0.974839	0.859277	1.04912	0	0.435702	0.133846	0
AGAP010756		Unknown	D	0.79672	2.71103	1.22045	1.0478	0.201239	0.350678	0.349734	0.520472
AGAP002155		hepatocyte nuclear factor 4 [Source:VB Community Annotation]	D	1.50796	1.27333	1.05988	1.04724	0	0.132508	0.547083	1.62614
AGAP009816		anterior pharynx defective 1 [Source:VB Community Annotation]	D	3.25325	4.7443	2.25661	1.04677	0	1.37078	0.28477	0.89272
AGAP007970	APG18A	autophagy related gene [Source:VB Community Annotation]	D	1.87175	2.04676	2.52042	1.0442	0	0	1.08621	2.44316
AGAP002821		TM2 domain	D	1.59252	2.28712	0.871703	1.04157	0	0.71852	0.543235	0.260859
AGAP008046		protein kinase C and casein kinase substrate in neurons 2 protein [Source:VB Community Annotation]	D	2.12049	2.69529	1.65773	1.04098	0.0607953	0.54942	1.50582	4.32898
AGAP007422		Unknown	D	1.09029	1.57123	0.917187	1.04082	0.0922589	0.475109	0.762994	0
AGAP005279		Rho-type gtpase activating protein [Source:VB Community Annotation]	D	0.787928	1.43456	0.386214	1.04048	0.0851815	1.01455	1.71444	3.66298
AGAP008495		bis(5'-nucleosidyl)-tetraphosphatase [Source:VB Community Annotation]	D	0.391252	1.41855	1.026	1.04048	0.176398	0.264253	0	0
AGAP010843		Unknown	D	0.339166	1.09825	0.345586	1.03847	0	0.417979	0.11479	0.275943
AGAP006678		cyclin T [Source:VB Community Annotation]	D	0.497936	1.63295	0.881681	1.03624	0.0967077	0.39137	0.343952	0.271285
AGAP010697		Zinc finger, FYVE/PHD-type	D	0.729949	0.999621	0.287165	1.03612	0.0121236	0.238293	0.0826634	0.905956
AGAP000622		5-formyltetrahydrofolate cyclo-ligase family	D	0.448422	1.37794	0.0704746	1.03216	0.146714	0.477359	0.256664	1.81531
AGAP006109		Unknown	D	1.2757	0.758918	0.856425	1.03135	0.285633	0.171935	0	0.232253
AGAP011360	ARRK	arrestin kurtz-like [Source:VB Community Annotation]	D	2.41624	2.45376	0.633716	1.03042	1.19386	0.530769	1.8169	4.87904
AGAP005341		myotubularin related protein 6 [Source:VB Community Annotation]	D	3.21198	2.0558	0.631815	1.02846	0.255976	0.687242	1.68708	5.55123
AGAP004773		pyruvate dehydrogenase E1 component subunit alpha%2C mitochondrial [Source:VB Community Annotation]	D	0	0.736554	0.762162	1.02632	0.0755929	0.271182	0	0.173992
AGAP010594		Protein CWC15 homolog A [Source:VB Community Annotation]	D	1.08462	1.77278	1.1251	1.02529	0	0.273393	0.157559	0.250836
AGAP004607		Insulin-like growth factor binding protein	D	2.56992	1.23336	0.525981	1.02488	0.43363	0.338164	0.959919	2.08808
AGAP013168	Mocs2	Molybdopterin synthase catalytic subunit [Source:UniProtKB/Swiss-Prot%3BAcc:Q7QAD7]	D	0.426644	1.71754	0.820057	1.02052	0	0.356628	0.41118	0
AGAP005560		microspherule protein 1 [Source:VB Community Annotation]	D	0.607992	2.85917	0.974798	1.01549	0	0.536517	0.82892	0.355795
AGAP011177		E3 ubiquitin-protein ligase MYCBP2 [Source:VB Community Annotation]	D	0.746263	1.19907	1.1537	1.01546	0.394929	0.405863	0.992452	1.47141
AGAP007595		Unknown	D	2.09752	2.31014	1.45436	1.01479	0	0.462252	1.23586	2.34285
AGAP001795		mortality factor 4-like protein 1 [Source:VB Community Annotation]	D	1.36933	2.189	0.561012	1.01369	0	0.10696	0.88941	2.31126
AGAP010842		methyltransferase C20orf7 homolog%2C mitochondrial [Source:VB Community Annotation]	D	1.86419	1.71212	0.44308	1.01347	0	0.47924	0.884999	1.59733
AGAP009936		cyclin-dependent kinase 8/11 [Source:VB Community Annotation]	D	1.96618	0.991716	0.570902	1.00848	0	0.548439	0.659055	1.4666
AGAP005461		NSE1-type zinc finger	D	0	1.4577	0.287478	1.00667	0	0.210289	0	0.290246
AGAP003265		peptidyl-prolyl isomerase D [Source:VB Community Annotation]	D	0.891342	0.920334	1.62078	1.00564	0	0.412608	0.28123	0.326014
AGAP006992		Unknown	D	0.330971	0.527184	0.756216	1.00543	0	0.660996	0.175345	0.484089
AGAP009888		SANT/Myb domain	D	2.286	2.05765	0.257161	1.00519	0.12108	0	0.490579	1.39774
AGAP010837		mitogen-activated protein kinase kinase kinase kinase 5 [Source:VB Community Annotation]	D	2.05782	0.398688	1.00892	1.00314	0.383093	1.03588	1.96869	4.23211
AGAP010090		receptor-type tyrosine-protein phosphatase F [Source:VB Community Annotation]	D	3.40922	0.808093	0.880929	1.00187	0.84246	0.0214969	3.20465	5.21618
AGAP008876		ATP synthase mitochondrial F1 complex assembly factor 2 [Source:VB Community Annotation]	D	0.717292	1.83188	0	0.99718	0.162589	0.296387	0.187729	0.185539
AGAP000826		cap-specific mRNA (nucleoside-2'-O-)-methyltransferase 1 [Source:VB Community Annotation]	D	1.33828	2.30754	0.52561	0.995958	0	0.404977	0.303932	0
AGAP005079		guanine nucleotide-binding protein G(q) alpha subunit [Source:VB Community Annotation]	D	1.97597	2.25269	1.9627	0.993163	0.186002	0.659847	2.6702	4.7192
AGAP003792		phosphatidylinositol glycan%2C class B [Source:VB Community Annotation]	D	1.17355	1.0616	0.943643	0.992664	0.380576	0.540026	1.13282	1.40861
AGAP009645		apoptosis inhibitor [Source:VB Community Annotation]	D	0.610775	1.58961	0.776757	0.992541	0.268891	0.900235	0.676498	0.822833
AGAP004089		Ubiquitin-like	D	1.51577	2.61732	1.46647	0.988921	0	0.330863	0.131992	1.52695
AGAP003365		mitogen-activated protein kinase kinase 4 [Source:VB Community Annotation]	D	1.56229	0.874033	0.491787	0.987321	0.130989	0.817891	0.967691	1.95639
AGAP010587		tetratricopeptide repeat protein 7B [Source:VB Community Annotation]	D	1.18886	1.56504	0.489972	0.985264	0	0.212508	0.478725	0.401909
AGAP010379		F-box protein 28 [Source:VB Community Annotation]	D	1.58412	1.35318	0.719338	0.982318	0.344581	0.344197	1.26236	1.99919
AGAP000555	mal	Molybdenum cofactor sulfurase [Source:UniProtKB/Swiss-Prot%3BAcc:Q7QFL7]	D	0	0.260832	0.289463	0.981549	0	0.283894	0.137144	0
AGAP004161		myofilin variant C [Source:VB Community Annotation]	D	2.67078	1.65256	2.05979	0.981282	0.405084	2.01196	1.92465	1.649
AGAP008044		programmed cell death 8 (apoptosis-inducing factor) [Source:VB Community Annotation]	D	1.15689	1.83501	0.483796	0.979253	0	0.527675	1.18845	0.470105
AGAP005211		CDK5 regulatory subunit-associated protein 1-like 1 [Source:VB Community Annotation]	D	0.528785	1.98205	0.0497479	0.979054	0.100488	0.299371	0.68633	0.973594
AGAP000397		nucleolar protein 14 [Source:VB Community Annotation]	D	0.501438	0.462968	0.0921122	0.976283	0.173874	0.226635	0.0767464	0.284022
AGAP008425		peptidyl-tRNA hydrolase ICT1 [Source:VB Community Annotation]	D	0	2.28386	0	0.976071	0	1.04895	0.524099	0
AGAP003357		RAG1-activating protein 1-like protein [Source:VB Community Annotation]	D	0.989217	1.47681	0.49527	0.97518	0	0.491655	0.434107	0.711059
AGAP010710		Tyrosine-protein kinase shark [Source:VB Community Annotation]	D	1.17273	1.18456	0.753551	0.974092	0.0681617	0.239955	0.998383	1.88662
AGAP003584		L-iditol 2-dehydrogenase [Source:VB Community Annotation]	D	2.12198	0.973639	1.31585	0.972756	0.421048	0.491687	0.462341	0.496012
AGAP008828		ATP-binding protein involved in chromosome partitioning [Source:VB Community Annotation]	D	0.796758	1.43736	0.459657	0.972571	0	0.540719	0.875471	1.78805
AGAP010417		tetratricopeptide repeat protein 39B [Source:VB Community Annotation]	D	1.84744	1.16272	1.72111	0.972485	0.383702	0.499607	2.63938	4.06642
AGAP001737		adenylyltransferase and sulfurtransferase MOCS3 Molybdopterin-synthase adenylyltransferase Molybdopterin-synthase sulfurtransferase [Source:VB Community Annotation]	D	0.161974	0.858007	0.97247	0.970426	0	0.17609	0.280127	0
AGAP008111		methyltransferase-like protein 14 [Source:VB Community Annotation]	D	0.836634	0.506829	0.29113	0.969102	0.223718	0.071594	0.716781	2.23632
AGAP002927		high affinity cGMP-specific 3'%2C5'-cyclic phosphodiesterase 9 [Source:VB Community Annotation]	D	2.8038	0.506916	0.025371	0.967833	0.392469	0.591167	2.00793	3.04839
AGAP011745		Bestrophin homolog [Source:UniProtKB/TrEMBL%3BAcc:Q7PZ58]	D	0.595604	1.9516	0.943496	0.967397	0.234977	0.412915	0.959975	2.00609
AGAP009889		cabut [Source:VB Community Annotation]	D	0.435446	0.9474	0.349295	0.967191	0.210181	0.460939	0	0
AGAP008300		elongator complex protein 3 [Source:VB Community Annotation]	D	0.528927	1.88302	0.293579	0.966252	0.332293	0.412089	0.594904	1.4313
AGAP008374		Inosine triphosphate pyrophosphatase [Source:UniProtKB/Swiss-Prot%3BAcc:Q7Q4F5]	D	0.641475	2.22212	0	0.966228	0	0.338175	0.406831	1.42756
AGAP000634		Regulator of telomere elongation helicase 1 homolog [Source:UniProtKB/Swiss-Prot%3BAcc:Q7QEI1]	D	1.35108	1.46526	0	0.957218	0	0.484908	0.618827	0.854038
AGAP010939	APG5	autophagy related gene [Source:VB Community Annotation]	D	1.12494	1.19815	0.28327	0.956423	0.326714	0.212741	0.81922	2.89469
AGAP002626		rhomboid-like protein [Source:VB Community Annotation]	D	0.993386	1.95906	0.0582504	0.955964	0.403844	0.683539	0.285616	0.288276
AGAP001683		calcium/calmodulin-dependent serine protein kinase [Source:VB Community Annotation]	D	3.50908	1.18745	0.526894	0.955059	0.343077	0.556346	3.40449	6.26784
AGAP002219		GTPase KRas [Source:VB Community Annotation]	D	1.9526	2.08907	1.05448	0.95495	0.102834	0.495057	0.976626	1.02838
AGAP011285		Unknown	D	0.471077	0.868265	0.684836	0.952844	0.222092	0.285018	0.775654	0.899565
AGAP005545		Unknown	D	1.52468	1.62595	0.649818	0.952733	0.182638	1.19213	0.279536	1.50989
AGAP004520		Ran-binding protein 3 [Source:VB Community Annotation]	D	1.44059	2.64511	0.43892	0.949755	0	0.61738	1.31978	2.04695
AGAP001278		Cysteine-rich hydrophobic domain 2 [Source:VB Community Annotation]	D	1.64207	0.558782	0.436131	0.949563	0.114273	0	0.827121	2.10147
AGAP000161		Adaptor-related protein complex 3%2C delta 1 subunit [Source:VB Community Annotation]	D	1.13993	2.66557	1.04119	0.948803	0	0.692017	0.925067	0.609274
AGAP005812		ELONGATOR COMPLEX PROTEIN 5	D	0.357091	0.985313	0.300624	0.948212	0	0.806359	0.326888	0.273346
AGAP007723		guanine nucleotide exchange factor DBS [Source:VB Community Annotation]	D	2.89871	0.459737	1.28002	0.947973	0.416254	0.451145	2.90573	5.18456
AGAP005042		MAP-kinase scaffold activity (Sunday driver)	D	1.3685	0.706626	0.581185	0.946681	0.0447124	0.521883	1.04952	2.34632
AGAP000978		origin recognition complex subunit 5 [Source:VB Community Annotation]	D	0.282	1.87144	0.263827	0.946249	0	0.178395	0.375279	0.530914
AGAP004018		Unknown	D	0.491072	1.28295	0.836409	0.946079	0.40275	0.368138	1.56488	2.46537
AGAP001393	Sgf11	SAGA-associated factor 11 homolog [Source:UniProtKB/Swiss-Prot%3BAcc:Q7PXG4]	D	1.60243	1.54762	0	0.939714	0.453388	0.674448	2.03549	0.889373
AGAP003158		serine/threonine-protein kinase [Source:VB Community Annotation]	D	0.367938	0.255269	0.194589	0.937408	0	0.528792	0.119813	0.820376
AGAP005738		TBC1 domain family member 13 [Source:VB Community Annotation]	D	0.60518	2.2151	0.440985	0.937355	0	0.191281	0.488598	0.86349
AGAP005123		nucleoside-diphosphate kinase [Source:VB Community Annotation]	D	1.38073	1.42136	0.353883	0.93735	0.309113	0	0.998667	0.216164
AGAP010419		Rab proteins geranylgeranyltransferase component A [Source:VB Community Annotation]	D	1.63652	1.53148	0.799056	0.929023	0	0.280192	0.135673	0.351493
AGAP011831		H/ACA ribonucleoprotein complex non-core subunit NAF1 [Source:VB Community Annotation]	D	0.459646	1.24853	0.5129	0.928379	0.475742	0.191024	0.74085	0.321004
AGAP002608		Ribokinase [Source:UniProtKB/TrEMBL%3BAcc:Q7QCF9]	D	0.262995	1.61734	1.22375	0.928012	0.284162	0	0	0.732588
AGAP000554		ASC-1 homology domain; Putative zinc finger motif	D	1.05828	2.4883	0.618506	0.927056	0.178099	0.466485	0.156469	0.359626
AGAP008660		peptidylprolyl isomerase domain and WD repeat-containing protein 1 [Source:VB Community Annotation]	D	0.374988	1.53189	0.729316	0.92508	0	0	0	1.63637
AGAP003982		methyl-CpG-binding domain protein 2 [Source:VB Community Annotation]	D	1.28644	2.02868	0	0.924319	0	0	0.625319	0.407646
AGAP003907		Unknown	D	1.08227	0.969773	0.697668	0.92356	0	0.282829	0.907755	0.899917
AGAP004425		Dephospho-CoA kinase domain-containing protein [Source:VB Community Annotation]	D	1.48634	2.63479	0.476722	0.920624	0.304271	0.552666	1.48826	3.96773
AGAP000106		Ubiquinone biosynthesis monooxygenase COQ6%2C mitochondrial [Source:UniProtKB/TrEMBL%3BAcc:Q7QER0]	D	1.15002	1.7911	0.229262	0.919291	0.155558	0.172969	0.59958	0.85254
AGAP011922		Lipase maturation factor [Source:UniProtKB/TrEMBL%3BAcc:A0A1S4H7Y4]	D	1.23436	0.645336	1.14879	0.91468	0.335109	0.268536	0.576624	1.21036
AGAP003903		Required for meiotic nuclear division 1 homolog (S. cerevisiae) [Source:VB Community Annotation]	D	1.23379	2.22892	0.603401	0.914304	0	0.236794	1.63919	1.11987
AGAP000171		E3 ubiquitin-protein ligase [Source:VB Community Annotation]	D	2.21126	1.25666	1.15422	0.913461	0.343005	0.900389	0.498802	0.86162
AGAP003820		Lin-10 homolog [Source:VB Community Annotation]	D	1.58498	0.179756	0.381042	0.913334	0.198942	0	0.720912	2.59765
AGAP004889		ubiquitin-conjugating enzyme (huntingtin interacting protein 2) [Source:VB Community Annotation]	D	4.17473	2.82708	2.26246	0.911518	0.37093	0.621002	1.05545	1.63596
AGAP000328		AMME syndrome candidate gene 1 protein [Source:VB Community Annotation]	D	2.42687	1.77202	0.607695	0.911392	0.642192	0.156589	1.24539	3.88009
AGAP008236	Thoc2	THO complex subunit 2 [Source:VB Community Annotation]	D	0.361855	1.75637	0.572323	0.910764	0.320868	0.466673	0.492381	1.5871
AGAP005826		Unknown	D	1.03477	1.77756	0.508769	0.908758	0.367233	0.183745	0.523692	1.5645
AGAP004952		CBF1 interacting corepressor [Source:VB Community Annotation]	D	2.14073	2.1691	1.68231	0.907277	0	0.25034	0.774284	0.896288
AGAP001902	Rheb	GTP-binding protein Rheb [Source:VB Community Annotation]	D	1.59139	3.90736	4.25647	0.906866	0	0.574733	0.71218	1.62862
AGAP010488		ubiquinone biosynthesis methyltransferase [Source:VB Community Annotation]	D	2.42588	2.69363	0.81181	0.904329	0.417345	0.691922	2.10322	2.44323
AGAP009563		myotubularin related protein 2 [Source:VB Community Annotation]	D	2.65952	3.33954	0.827741	0.90422	0.441233	0.599994	1.67031	2.38466
AGAP006634		Semaphorin-2A [Source:VB Community Annotation]	D	3.40601	1.03601	1.93545	0.903736	0.182692	0.557851	2.82193	5.46264
AGAP011055		cell division cycle 2-like [Source:VB Community Annotation]	D	0.344284	0.513968	0.280439	0.900401	0.106178	0.652548	0.470484	0.475354
AGAP010544		cell cycle arrest protein BUB3 [Source:VB Community Annotation]	D	1.09135	1.14866	1.11097	0.899987	0.110355	0.754165	0.505294	0
AGAP001103		mitogen-activated protein kinase kinase 1 [Source:VB Community Annotation]	D	1.75584	2.56529	1.33229	0.899727	0.199205	0.22491	1.68878	4.84568
AGAP008626		Androgen-induced 1 [Source:VB Community Annotation]	D	1.78636	2.4067	2.05388	0.899103	0	0.320118	1.15612	3.60096
AGAP009660		GTP:AMP phosphotransferase mitochondrial [Source:VB Community Annotation]	D	1.06309	1.13363	0.727842	0.895459	0	0.136006	1.0561	1.65325
AGAP004154		jagged/serrate [Source:VB Community Annotation]	D	1.59849	0.529168	1.26843	0.895455	0.147055	0.724742	1.95944	4.1362
AGAP011586		protein-tyrosine phosphatase [Source:VB Community Annotation]	D	1.20289	1.37987	0.716421	0.894212	0.127981	0.446882	0.365903	0.789921
AGAP008196		anaphase-promoting complex subunit 11 [Source:VB Community Annotation]	D	0.511303	0.655916	0.187602	0.89386	0	0.2097	0.42208	1.81286
AGAP004780		cyclin-dependent kinase 12/13 [Source:VB Community Annotation]	D	2.71797	2.04589	0.594588	0.892508	0.439828	0.319081	2.22779	3.4733
AGAP005498		phospholipid scramblase 2 [Source:VB Community Annotation]	D	1.43776	0.549466	0.665639	0.891833	0	0.318892	0.726691	1.21841
AGAP002243		ankyrin repeat and FYVE domain-containing protein 1 [Source:VB Community Annotation]	D	2.18405	1.81767	0.0934629	0.891092	0.117325	0.248166	0.531199	1.62791
AGAP008668		Unknown	D	0.77432	1.99794	1.20358	0.891032	0.0939042	0.24868	0.216575	0.236796
AGAP001778		Unknown	D	0	0.992889	0.271301	0.889526	0	0.199098	0.407333	0
AGAP009942		prolactin regulatory element-binding protein [Source:VB Community Annotation]	D	1.05743	1.67257	0.624455	0.889268	0.131498	0.191614	0.104705	0.432115
AGAP012376		peptidyl-prolyl cis-trans isomerase-like 1 [Source:VB Community Annotation]	D	0.975608	1.52522	0.444391	0.889139	0	0.404216	0	0.565872
AGAP002108		dual specificity phosphatase [Source:VB Community Annotation]	D	0.750853	1.26282	0.13521	0.88865	0	1.03075	0.605964	0.511182
AGAP010677		ankyrin repeat domain-containing protein 13D [Source:VB Community Annotation]	D	1.11504	1.59843	0.867351	0.887512	0.238908	0.170724	0.619536	0.386135
AGAP008042		pyridine nucleotide-disulfide oxidoreductase domain 1 [Source:VB Community Annotation]	D	1.20456	1.83785	0.978782	0.887498	0.0667249	0.191184	0.753916	0.807407
AGAP011822		proteasome component ECM29 [Source:VB Community Annotation]	D	0.820589	1.10928	0.733667	0.887209	0.116338	0	1.02845	0.484393
AGAP002646		cyclin-dependent kinase 7 [Source:VB Community Annotation]	D	0.483558	1.82139	0.414383	0.887116	0	0.395792	0.465476	0.581529
AGAP009262		Unknown	D	1.36073	0.454351	0.547001	0.886912	0.211961	0.607977	0.437023	1.91286
AGAP006665		Myosin binding subunit	D	1.81309	1.82211	0.930202	0.886369	0.476381	0.590146	2.09743	3.26864
AGAP006736		zinc finger protein GLIS2 [Source:VB Community Annotation]	D	2.25854	0.637506	0.473223	0.886201	0.175932	0.408481	1.58893	3.02029
AGAP011816		Unknown	D	0.347483	1.26251	0.55294	0.886044	0	0.579802	0.212044	0.24682
AGAP004656		histone-lysine N-methyltransferase NSD2 [Source:VB Community Annotation]	D	1.63754	1.72687	0.535187	0.885334	0.301928	0.552953	1.48872	2.80733
AGAP009116		ER-derived vesicles protein ERV14 [Source:VB Community Annotation]	D	1.50893	0.849472	0.313681	0.885007	0	0.298429	0.850998	1.77952
AGAP004039		afadin [Source:VB Community Annotation]	D	2.26418	0.452179	0.760731	0.884951	0.189999	0.189761	2.1844	4.34678
AGAP002710		Unknown	D	0.985896	0.881502	1.12983	0.884337	0.0765416	0.165043	1.0624	1.88243
AGAP002301		bud site selection protein 31 [Source:VB Community Annotation]	D	0	2.73329	1.18506	0.883355	0	0.476087	0.474801	0.270506
AGAP004715		Pyruvate dehydrogenase phosphatase regulatory subunit%2C mitochondrial [Source:VB Community Annotation]	D	2.59848	2.98591	0.548432	0.882586	0.335392	0.22286	2.32592	3.92413
AGAP007742		E3 UFM1-protein ligase 1 homolog [Source:UniProtKB/Swiss-Prot%3BAcc:Q7Q373]	D	1.06185	1.81763	0	0.88188	0	0.429487	0.488204	1.05916
AGAP000199		phospholipase D3/4 [Source:VB Community Annotation]	D	0.783195	2.06068	1.56862	0.879945	0.188997	0.504867	0.484015	2.0864
AGAP007874		CWC22 spliceosome-associated protein homolog [Source:VB Community Annotation]	D	1.15073	1.37442	0.294238	0.87942	0.220784	0.475596	0.195556	2.29743
AGAP002528		trafficking protein particle complex subunit 2 [Source:VB Community Annotation]	D	0.874914	2.36832	0.908294	0.878474	0	0.170879	0.37333	0.75946
AGAP009222		DNA ligase 1 [Source:VB Community Annotation]	D	0.791626	2.54555	0.290036	0.878112	0.035807	0.334041	0.501321	0.934305
AGAP006662		Unknown	D	0.987467	1.5504	0.859795	0.876922	0.0801673	0	0.585886	0
AGAP000337		regulator of nonsense transcripts 2 [Source:VB Community Annotation]	D	1.30201	1.16325	0.143541	0.875136	0	0.468856	0.119235	0
AGAP001133		regulator of nonsense transcripts 1 [Source:VB Community Annotation]	D	0	1.24743	0.442584	0.874627	0.179225	0	0.272669	0.648329
AGAP005506		Boule%2C transcript variant B [Source:VB Community Annotation]	D	2.38477	0.587995	0.448661	0.872992	0.331983	0.67388	2.88186	3.66105
AGAP001357		beta-catenin-like protein 1 [Source:VB Community Annotation]	D	2.04949	1.63481	0	0.872361	0	0.22158	1.03526	1.11757
AGAP012026		beta-adrenergic-receptor kinase [Source:VB Community Annotation]	D	0.834266	0.306743	0.072345	0.872077	0.424295	0.30112	1.20895	1.91779
AGAP009511		E3 ubiquitin-protein ligase HECTD1 [Source:VB Community Annotation]	D	0.498498	1.24255	1.29212	0.87185	0.279091	0.524772	0.712342	0.888519
AGAP009320		Unknown	D	1.6403	0.965789	0.726376	0.870944	0.0786493	0.347299	0.79347	0.987067
AGAP003118		SWI/SNF related%2C matrix associated%2C actin dependent regulator of chromatin [Source:VB Community Annotation]	D	1.48113	1.23685	0.506568	0.86915	0.0729952	0.0813873	0.274745	0.533355
AGAP005622		F-box protein 33 [Source:VB Community Annotation]	D	1.80201	0.505812	0.740366	0.868752	0.174103	1.2881	1.73403	4.44776
AGAP002335		nucleolysin TIA-1/TIAR [Source:VB Community Annotation]	D	0.931403	1.86127	0.76353	0.867136	0.105465	0.512961	0.527437	1.25337
AGAP011299		glycosylphosphatidylinositol deacylase [Source:VB Community Annotation]	D	0.745378	2.43532	0.707434	0.866537	0	0	0.323929	0.409379
AGAP009167		Unknown	D	1.24126	0.863019	0.907776	0.86518	0.583542	0.783883	0.350298	1.75735
AGAP009887		Unknown	D	1.06636	1.7239	1.09371	0.862702	0.327889	0.450639	0.561566	1.44193
AGAP003555		multiple inositol-polyphosphate phosphatase [Source:VB Community Annotation]	D	1.6332	1.94952	1.54853	0.860815	0	0.496077	0	0.892885
AGAP001482		Unknown	D	0.348628	0.729223	0.41107	0.858882	0	0.500429	0.442172	0.509849
AGAP002339		AN1-type zinc finger protein 2B [Source:VB Community Annotation]	D	0.415601	1.10411	1.39118	0.857619	0	0.510701	0.288619	1.26639
AGAP003698		zinc finger protein 593 homolog [Source:VB Community Annotation]	D	0.306921	0.758186	0.415985	0.85473	0.105632	0	0	0
AGAP001889		Metallothionein	D	1.12335	0.860145	2.05322	0.852562	0.207414	0.183112	0.151844	0.374717
AGAP007586		conserved oligomeric Golgi complex subunit 6 [Source:VB Community Annotation]	D	1.14999	1.48278	0.312173	0.852557	0	0.246664	0.142513	0.999387
AGAP010342		Unknown	D	0.305137	1.35325	0.78814	0.852356	0.400083	0.438478	1.51749	2.39398
AGAP009178		Reticulon 4 interacting protein 1 [Source:VB Community Annotation]	D	1.20438	1.5866	0	0.852047	0	0.118812	0	0.477472
AGAP004028		intron-binding protein aquarius [Source:VB Community Annotation]	D	1.27647	1.94494	0.389452	0.851901	0.141985	0.944844	0.433348	1.12064
AGAP009826		Myotubularin-like phosphatase domain	D	1.52594	0.376731	0.475382	0.851786	0.459675	0.0672723	0.412429	1.56928
AGAP002269		Unknown	D	0.867887	1.13386	0.305228	0.851569	0	0.423891	0.523649	0.926808
AGAP005863		N-alpha-acetyltransferase 35%2C NatC auxiliary subunit [Source:VB Community Annotation]	D	1.24092	0.939192	1.27733	0.850753	0.2209	0.92093	0.226171	0.702067
AGAP000983		deep orange/late endosomal biogenesis	D	1.00801	1.32599	0.554827	0.849689	0.083958	0.229228	0.237858	0
AGAP000792		Adenosylhomocysteinase [Source:UniProtKB/TrEMBL%3BAcc:Q7QE71]	D	1.57894	1.99007	0.938341	0.849445	0	0.201943	0.463618	1.33375
AGAP011993		Unknown	D	2.95838	0.903864	0.788363	0.848692	0.116642	0	1.49054	3.80735
AGAP012469		Unknown	D	1.50009	1.04031	1.3874	0.847622	0.199251	0.147273	0.31266	0.533055
AGAP004176		serine/threonine-protein kinase/endoribonuclease IRE1 [Source:VB Community Annotation]	D	2.91756	1.46273	0.669036	0.845825	0	0.247196	1.74942	3.28858
AGAP012696		Sulfotransferase (Sult) [Source:VB Community Annotation]	D	0	0.519421	0.330651	0.84506	0	0	0	0
AGAP004412		diphthine synthase [Source:VB Community Annotation]	D	1.97738	1.80724	0	0.840693	0.0894088	0.0894261	1.86463	1.81404
AGAP003870	Thoc7	THO complex subunit 7 [Source:VB Community Annotation]	D	0	1.17844	0	0.839763	0	0.117405	0.188874	0.213818
AGAP008106		Trafficking protein particle complex subunit 4 [Source:VB Community Annotation]	D	1.01294	1.29116	1.07088	0.839458	0.280871	0.298447	0.291707	1.13342
AGAP012336		Unknown	D	0.583932	0.352053	0	0.839432	0.055935	0.175426	0.297888	0.409529
AGAP013488		Trafficking protein particle complex 2-like [Source:VB Community Annotation]	D	0	0.906518	0	0.83624	0.119767	0.693058	0.611065	0.320155
AGAP003737		ESF2/ABP1 family protein [Source:VB Community Annotation]	D	1.35328	0.755142	0.267592	0.835555	0	0.32321	0.51097	2.99957
AGAP008705		Unknown	D	1.35283	1.58004	1.29586	0.835063	0.238035	0.391017	0.519226	2.15808
AGAP002364		MICOS complex subunit MIC60 [Source:UniProtKB/TrEMBL%3BAcc:F5HK71]	D	2.06017	3.13533	1.41458	0.832891	0.0471716	1.17731	1.46566	0.896887
AGAP002512		protein FRG1 [Source:VB Community Annotation]	D	1.09665	1.62224	0.77553	0.831925	0.172306	0.168046	0.226791	2.23405
AGAP002657		negative regulation of protein phosphatase type 2A activity/DNA damage checkpoint	D	1.04368	2.1017	0.484285	0.831437	0.575143	0	0.199152	0.408768
AGAP002257		tetraspanin 14 [Source:VB Community Annotation]	D	3.84667	3.79561	0.31502	0.831024	0	0.250941	0.54185	0.600956
AGAP003337		hydroxyacylglutathione hydrolase	D	2.01633	1.16015	0.260851	0.828861	0.184269	0.803732	0.820504	2.25198
AGAP010681		5'-nucleotidase [Source:UniProtKB/TrEMBL%3BAcc:Q7QE29]	D	2.02155	1.04908	0.897209	0.828678	0	0.104375	0.398348	0.804969
AGAP008930		phosphatidylinositol glycan%2C class X [Source:VB Community Annotation]	D	0.772143	1.00023	0.59833	0.826617	0	0.561465	0.570319	0.440728
AGAP004195		D-2-hydroxyglutarate dehydrogenase%2C mitochondrial [Source:VB Community Annotation]	D	0.677538	0.864837	0.483483	0.826327	0.791512	0.789497	1.08694	2.1709
AGAP009083		Zinc finger, CCHC-type	D	1.44513	1.21028	0.861473	0.82577	0.189632	0.158149	0.920789	3.19456
AGAP003230		poly (ADP-ribose) polymerase [Source:VB Community Annotation]	D	1.21675	1.00071	0.471043	0.823917	0.571126	0.0551209	0.559796	0.376156
AGAP001608		Unknown	D	1.34819	0.947735	0.66271	0.822151	0.371131	0.776774	2.41352	3.63637
AGAP009459	cdk1	cyclin-dependent kinase 1 [Source:VB Community Annotation]	D	0.193984	3.42366	0.880256	0.821927	0.233383	0.584035	0.132901	1.16883
AGAP009650		YEATS domain-containing protein 4 [Source:VB Community Annotation]	D	0.756066	1.23192	0.24509	0.821762	0	0.639063	1.13528	1.19215
AGAP008535		Unknown	D	1.2256	0.357577	1.23906	0.821708	0.126276	0.272788	1.39894	2.25506
AGAP007650		growth arrest and DNA-damage-inducible protein [Source:VB Community Annotation]	D	0.825809	2.25646	0.989125	0.821628	0.141676	0.917913	0.518459	0.86248
AGAP010143		Unknown	D	1.03388	1.37906	0.834524	0.821627	0.20981	0	1.38551	2.31404
AGAP004065		hemomucin [Source:VB Community Annotation]	D	0.545086	1.65092	1.45916	0.82153	0.112673	0.733222	0.630467	1.75917
AGAP004953		G protein pathway suppressor 1 [Source:VB Community Annotation]	D	1.44967	1.14462	1.04878	0.816782	0	0.146013	0.421932	0.182032
AGAP004311		phosphopantothenate-cysteine ligase [Source:VB Community Annotation]	D	2.46217	2.23382	0.454793	0.816279	0	0.343173	1.52488	4.24465
AGAP006165	domino	E1A-binding protein p400 [Source:VB Community Annotation]	D	1.44877	1.24716	0.924697	0.814941	0.227385	0.986921	2.13106	3.22986
AGAP007174		E3 ubiquitin-protein ligase MARCH1/8 [Source:VB Community Annotation]	D	0.625858	0.626102	0.148318	0.814674	0	0.127037	0.958773	0.605553
AGAP005858		protein lin-7 homolog C [Source:VB Community Annotation]	D	1.69474	1.62023	0.67208	0.812866	0.187798	0.310666	0	0.54106
AGAP002968		thiamine pyrophosphokinase [Source:VB Community Annotation]	D	1.13489	0.427968	0.235683	0.812584	0	0.185115	0.214383	0.710545
AGAP008572		TIM21-like protein%2C mitochondrial precursor [Source:VB Community Annotation]	D	0.662952	1.8303	0.0796046	0.810169	0	0	0.608159	1.2069
AGAP000258		Hexosyltransferase [Source:UniProtKB/TrEMBL%3BAcc:Q7PRX3]	D	0.411026	0.786535	0.643013	0.806938	0	0.132604	0	0.274442
AGAP007296	APG12	autophagy related gene [Source:VB Community Annotation]	D	0	1.65005	0.746289	0.806365	0	0.288792	0.304065	0.748957
AGAP005287		Unknown	D	0.729811	1.38394	0.999696	0.805045	0	0.0849324	0.584232	1.1133
AGAP001363		cohesin loading complex subunit SCC4 homolog [Source:VB Community Annotation]	D	0	1.4007	0.718417	0.802866	0	0.567142	0.195515	0
AGAP011217		E3 ubiquitin-protein ligase RBBP6 [Source:VB Community Annotation]	D	0.258204	1.0097	0.584578	0.800975	0.0734243	0.436257	0.482597	0.888994
AGAP001310		Protein-S-isoprenylcysteine O-methyltransferase [Source:UniProtKB/TrEMBL%3BAcc:Q7PXA7]	D	2.56765	0.709556	0.872586	0.80062	0	0.405857	0.735018	2.89842
AGAP012093		Unknown	D	0.45469	0.830679	0.836849	0.800063	0	0	0	0
AGAP006388		structural maintenance of chromosome 3 (chondroitin sulfate proteoglycan 6) [Source:VB Community Annotation]	D	0.375962	0.926638	0.925174	0.793919	0	0	0.397163	0.430197
AGAP005864		Fumarylacetoacetase	D	1.77671	1.16937	1.52483	0.792326	0.204386	0.172007	0.662121	1.39017
AGAP003593		Protein arginine methyltransferase RmtB [Source:VB Community Annotation]	D	1.36559	2.35146	0.799736	0.791887	0.0582514	0.0816448	0.382016	1.50184
AGAP003341		Rab-GTPase-TBC domain	D	1.85365	2.33527	0.48162	0.790432	0.23826	0.430048	1.42947	1.89934
AGAP007295		protein KRI1 [Source:VB Community Annotation]	D	1.21146	1.40178	0.257195	0.789865	0.197677	0.361318	1.19955	2.95973
AGAP006994		E3 ubiquitin-protein ligase HERC4 [Source:VB Community Annotation]	D	1.10251	1.87887	1.01695	0.788524	0	0.0980063	0.475807	1.01367
AGAP006889		elongator complex protein 2 [Source:VB Community Annotation]	D	0.824156	1.64962	0.365629	0.788323	0.0262613	0.0860866	0.248627	0.997318
AGAP005649		Ankyrin repeat	D	0.63697	1.20164	0.764157	0.787112	0.114568	0.557004	0.462734	0.743452
AGAP007689		RNA recognition motif domain	D	1.83133	1.68785	0.61297	0.785761	0	0	0.466796	0.903172
AGAP009840		USO1 vesicle docking protein homolog [Source:VB Community Annotation]	D	2.19566	0.726612	0.190241	0.785207	0.295862	0.381088	0.833366	1.78008
AGAP000456		Unknown	D	1.18275	1.64839	1.65463	0.782683	0	0.307262	0.512412	1.11145
AGAP003187		protein-tyrosine phosphatase [Source:VB Community Annotation]	D	0.970987	1.16881	0.409542	0.782589	0.0743542	0.608926	1.07989	2.10464
AGAP005711	CLK	clock [Source:VB Community Annotation]	D	2.31095	0.640014	1.0748	0.781261	0	0.488642	1.07123	2.27542
AGAP004467		centromere/kinetochore protein ZW10 [Source:VB Community Annotation]	D	0.855205	2.11762	0.833021	0.779589	0	0.089883	0.759316	0.852003
AGAP011573		Unknown	D	0.351282	1.10448	0.606316	0.775534	0.349293	0	0.231553	0.304332
AGAP007813		ankyrin repeat domain-containing protein 49 [Source:VB Community Annotation]	D	0.476334	3.40786	0.674107	0.775533	0	0.409703	0.323845	0.211075
AGAP009457		guanine nucleotide-binding protein subunit alpha-12 [Source:VB Community Annotation]	D	3.13017	1.38765	1.16642	0.775118	0.067287	0.409893	1.13395	2.93015
AGAP011293		Unknown	D	1.75299	0.907936	0.399071	0.775117	0.225493	0.467216	1.48491	3.56631
AGAP011155		dual specificity phosphatase [Source:VB Community Annotation]	D	0.719424	1.37567	0	0.774544	0.225053	0	1.14934	2.34372
AGAP010171	papi	Unknown	D	1.17018	1.43515	1.02172	0.766325	0	0.477799	1.24848	1.24986
AGAP005226		josephin [Source:VB Community Annotation]	D	0	0.557682	0.316736	0.764829	0	0.102486	0.666302	0.187711
AGAP004699		RAF proto-oncogene serine/threonine-protein kinase [Source:VB Community Annotation]	D	1.39749	1.30332	0.723464	0.763594	0	0.156672	0.350954	0.274793
AGAP005567		bone morphogenetic protein receptor type-2 [Source:VB Community Annotation]	D	1.74909	0.858235	1.97017	0.762117	0.172777	0.344722	1.30816	1.78223
AGAP008656	sema1a	semaphorin 6 [Source:VB Community Annotation]	D	2.48689	0.584274	0.910083	0.761067	0.442395	0.204446	3.40887	3.71457
AGAP002670		Unknown	D	2.01534	0.847074	1.0316	0.760452	0.371779	0.214712	0.874131	3.17418
AGAP002313		Small Interfering RNA-associated Factors	D	1.00106	0.224615	0.0301858	0.759933	0.144343	0	0.423739	1.89005
AGAP006083	fra	frazzled protein [Source:VB Community Annotation]	D	1.88057	0.548923	0.593631	0.759769	0.196341	0.392449	0.868941	0.90799
AGAP008064		uroporphyrinogen-III synthase [Source:VB Community Annotation]	D	1.2925	0.753875	0	0.758824	0	0.146998	0.82258	1.02492
AGAP009278		phosphorylase kinase alpha/beta subunit [Source:VB Community Annotation]	D	1.29874	1.14578	0.762017	0.754774	0.297391	0	0.403859	1.25441
AGAP008846		Unknown	D	1.09125	1.59123	0	0.75463	0	0.330461	0.293358	0.714376
AGAP009074		atrophin-1 interacting protein 5 (WW domain containing E3 ubiquitin protein li [Source:VB Community Annotation]	D	1.33448	1.3055	0.493781	0.75105	0.0785369	0.200829	1.89894	1.68647
AGAP011036		phosphatidylinositol-4-phosphate 3-kinase [Source:VB Community Annotation]	D	1.29696	1.10759	0.819507	0.750301	0.047688	0.614376	0.243882	0.385225
AGAP000708		phosphorylase kinase alpha/beta subunit [Source:VB Community Annotation]	D	2.00776	0.989235	0.970191	0.749838	0.197997	0.525436	1.70561	2.05389
AGAP010313		serine/threonine-protein kinase ATR [Source:VB Community Annotation]	D	1.38935	1.80743	0.188492	0.748027	0.110584	0.341812	0.794061	2.83648
AGAP011563		Yippee-like 2 [Source:VB Community Annotation]	D	3.29664	0.323188	1.43167	0.746761	0	0.227399	1.01466	3.31205
AGAP007387		DNA methyltransferase 1-associated protein 1 [Source:VB Community Annotation]	D	0.587751	2.83555	0.528769	0.745435	0	0	0.754932	1.16422
AGAP000195		cytoplasmic FMR1 interacting protein [Source:VB Community Annotation]	D	1.26073	1.77293	0.673321	0.744141	0.24404	0.199412	0.0726762	1.53819
AGAP011242		E3 ubiquitin ligase SMURF1/2 [Source:VB Community Annotation]	D	2.33999	0.707051	0.228704	0.74395	0.299081	0.241712	1.15944	2.26226
AGAP004320		Dedicator of cytokinesis protein 1 [Source:VB Community Annotation]	D	2.03717	1.6376	0.252653	0.740751	0.0791068	0.376703	1.89828	2.39018
AGAP002773		early growth response protein 1 [Source:VB Community Annotation]	D	1.12201	0.949283	0.923482	0.740701	0.429317	0.404674	0.592265	1.12639
AGAP007010		GTPase activator activity	D	1.33916	1.60503	0.762189	0.740113	0.505379	0.179437	1.2496	2.43514
AGAP010714		very-long-chain enoyl-CoA reductase [Source:VB Community Annotation]	D	0	2.55966	0.564968	0.739466	0.161957	0.545809	0.641068	1.62323
AGAP004585		Translin-associated factor X [Source:VB Community Annotation]	D	0	1.23807	0.364782	0.737314	0.503292	0.501594	1.32447	0.9968
AGAP000175		stromal interaction molecule [Source:VB Community Annotation]	D	0.875879	0.443809	0.219631	0.735827	0	0.0862358	1.20574	1.48495
AGAP012096		phenylalanyl-tRNA synthetase alpha chain [Source:VB Community Annotation]	D	1.0713	2.18549	0.162319	0.735489	0.272737	0	0.516624	0.613352
AGAP001999		protein neuralized [Source:VB Community Annotation]	D	1.95057	0.487188	0.373182	0.733625	0.220975	0.108799	1.22738	2.26088
AGAP002147		protein phosphatase [Source:VB Community Annotation]	D	0.890724	0.111388	0.81344	0.733488	0.503076	0.174218	1.26153	1.47402
AGAP009532		histidine protein methyltransferase 1 homolog [Source:VB Community Annotation]	D	1.03059	0.712498	0.292451	0.731858	0.244831	0.328037	1.03699	2.07049
AGAP007545		Contactin associated protein-like 2 [Source:VB Community Annotation]	D	1.96826	1.7324	0	0.731295	0.0722097	0.194008	0.793378	2.56617
AGAP001270		Unknown	D	0.271739	0.428534	0.279554	0.730995	0	0.0789474	0.338843	0.265274
AGAP008094		gamma-secretase subunit PEN-2 [Source:VB Community Annotation]	D	0.886345	1.91136	1.13769	0.730302	0	0.334355	0.566401	0.661185
AGAP008247		TGF-beta receptor type-1 [Source:VB Community Annotation]	D	0.992131	0.947078	1.08082	0.727982	0.247821	0.251008	0.838636	2.71197
AGAP000237		cAMP response element-binding protein (CREB) [Source:VB Community Annotation]	D	0.815435	0.726157	0.483504	0.727093	0	0.252303	0.255193	0.759608
AGAP003844		Class b basic helix-loop-helix protein [Source:VB Community Annotation]	D	0.97999	0.53964	1.31288	0.72677	0.277081	0.29999	0.715755	1.37295
AGAP012920		Unknown	D	1.02714	1.23173	0.415828	0.726028	0.14523	0.306458	0.643881	1.06667
AGAP001944		F-box and WD-40 domain protein 1/11 [Source:VB Community Annotation]	D	0.704728	1.0302	1.0352	0.725558	0	0.665756	2.06945	2.86654
AGAP001650		cation transport regulator-like protein 2 [Source:VB Community Annotation]	D	0.540214	1.38721	0.538967	0.725409	0.127649	0.986519	0.306537	0.72204
AGAP012500		Sperm-associated antigen 7 homolog [Source:VB Community Annotation]	D	0.592056	1.32739	0	0.721178	0	0.947965	0	0.598177
AGAP006474		Rho-related BTB domain-containing protein 1/2 [Source:VB Community Annotation]	D	2.69044	1.02864	0	0.720856	0.187727	0.0495215	2.81631	3.82739
AGAP002264		Unknown	D	1.94138	1.19575	1.69704	0.719358	0.189163	0.436018	0.878459	2.33774
AGAP001469		Protein tyrosine phosphatase%2C receptor type%2C f polypeptide (PTPRF) interacting protein (liprin) [Source:VB Community Annotation]	D	1.15465	0.733083	0.331798	0.719092	0.172895	0.644587	1.19419	2.93638
AGAP001867		mitogen-activated protein kinase kinase 7 [Source:VB Community Annotation]	D	1.43796	0.951522	0.231518	0.718453	0.24475	0.460651	0.487038	2.29288
AGAP003717		Twinfilin-1 [Source:VB Community Annotation]	D	0	1.86068	0.594577	0.718086	0.17285	0.297459	0.253353	0.136099
AGAP003562		Unknown	D	0.449086	0.550422	0.230359	0.717769	0.0704471	0	0.45406	0.961166
AGAP003891	Thoc3	THO complex subunit 3 [Source:VB Community Annotation]	D	1.07639	0.898734	0.143764	0.717504	0	0.495385	0.763544	1.88277
AGAP007378		N-acetyltransferase 9 [Source:VB Community Annotation]	D	1.72687	0.70317	0.503018	0.716395	0.494532	0.387545	1.49595	2.39658
AGAP008680		ubiquitin-conjugating enzyme E2 R [Source:VB Community Annotation]	D	1.2302	0.825749	0.924166	0.716283	0	0.409448	0.996811	4.1815
AGAP005116		coiled-coil domain containing 101 [Source:VB Community Annotation]	D	0.630311	0.59061	0	0.716237	0	0.260339	1.15411	0.92994
AGAP012425		Unknown	D	1.4268	0.529499	0.341803	0.715693	0	0.0460351	0.766487	3.23487
AGAP006203		F-box protein 28 [Source:VB Community Annotation]	D	1.61047	2.15329	1.53042	0.713687	0.106116	0.338048	0.609103	1.29559
AGAP000141		Unknown	D	0.50448	0.568863	0.449787	0.712452	0.300352	0.446493	0.147828	0.327279
AGAP000042		Histone-lysine N-methyltransferase [Source:UniProtKB/TrEMBL%3BAcc:Q5TUT6]	D	0.984032	1.11662	0.467096	0.710453	0.132546	0.177436	0.224488	0.656712
AGAP008768		Leucine carboxyl methyltransferase 1 protein [Source:VB Community Annotation]	D	0.477887	1.06865	0.302778	0.709294	0	0.12754	0.387071	0.571015
AGAP004315		Unknown	D	1.04798	0.746869	0.320729	0.709256	0.121174	0.450013	1.28599	2.7426
AGAP009403		Unknown	D	1.25785	1.27374	0.651272	0.708867	0.131445	0.161658	1.2684	1.89402
AGAP004314		exopolyphosphatase [Source:VB Community Annotation]	D	0.349821	1.34121	0.547602	0.707781	0	0.579788	1.13233	3.7722
AGAP003705		Set1/Ash2 histone methyltransferase complex subunit ASH2 [Source:VB Community Annotation]	D	1.48328	1.47819	0	0.70728	0	0.466865	0.770144	0.734734
AGAP002095	USP	ultraspiracle [Source:VB Community Annotation]	D	2.08775	1.27026	0.29676	0.706456	0.152795	0.512564	1.693	4.03408
AGAP000660		Rab GTPase binding	D	0.539399	2.00387	0.229112	0.703265	0.129302	0.812251	0.957689	2.0308
AGAP000297		Unknown	D	1.85138	1.54621	0.598128	0.703265	0.0884224	0.494615	0.505935	1.7694
AGAP005188		Unknown	D	0.352878	1.68458	0.693731	0.699704	0.110055	0.652753	1.04658	0.613347
AGAP002137		CHK kinase-like	D	2.10527	1.52443	0.578638	0.698289	0	0	0.867954	0.518117
AGAP006448		cAMP-dependent protein kinase regulator [Source:VB Community Annotation]	D	0.554123	1.60738	0.669415	0.698252	0.125455	0.487007	2.13591	3.13818
AGAP010223		Unknown	D	1.13904	0.92839	0.320504	0.698206	0	0.36613	0.642991	1.06958
AGAP006990		AT-rich interactive domain-containing protein 2 [Source:VB Community Annotation]	D	1.4822	0.354324	0.410791	0.697686	0.100456	0.290754	0.904422	0.671713
AGAP011383		rRNA-processing protein EBP2 [Source:VB Community Annotation]	D	0.673282	2.09838	0.356007	0.696975	0	0.787399	1.13525	1.4634
AGAP000339		E3 ubiquitin-protein ligase Hakai [Source:VB Community Annotation]	D	0	2.02555	0.468732	0.693746	0	0.178141	0.126046	0
AGAP001820		TATA-binding protein-associated factor [Source:VB Community Annotation]	D	0.554045	0.692259	0.336253	0.692603	0	0.398328	0.310477	1.24384
AGAP011127		Unknown	D	0.128506	1.5528	0.684552	0.690128	0.202579	0.502105	0.73292	0.295677
AGAP009034		doublecortin and CaM kinase-like 1 [Source:VB Community Annotation]	D	1.357	0.803561	0.368876	0.689578	0.0841395	0	0.671261	0.932745
AGAP011192		histone-lysine N-methyltransferase MLL3 [Source:VB Community Annotation]	D	1.08664	1.53783	0.646492	0.689216	0.318428	0.326301	0.132379	1.01953
AGAP009012		ubiquitin-like modifier-activating enzyme 5 [Source:VB Community Annotation]	D	0	1.32887	0.55798	0.687091	0	0.335586	0.876497	1.22023
AGAP006777		BTB/POZ domain-containing protein 10 [Source:VB Community Annotation]	D	1.32263	1.93564	0.77932	0.685568	0.0587128	0.395177	0.42322	0.173462
AGAP006133		nucleosome-remodeling factor subunit BPTF [Source:VB Community Annotation]	D	1.6625	0.811652	0.882457	0.684755	0.710097	0.914249	1.77849	1.86644
AGAP011488		conserved oligomeric Golgi complex subunit 8 [Source:VB Community Annotation]	D	0.235132	1.41497	0.346826	0.683672	0.335883	0.0513834	0	0.734533
AGAP007023	cue	Protein cueball [Source:UniProtKB/Swiss-Prot%3BAcc:Q7QIQ6]	D	1.32617	0.3605	0.266012	0.68094	0.335568	0.195439	0.686919	2.89584
AGAP000126		Unknown	D	0.392073	1.60911	1.03102	0.680246	0.410824	0	0.0495091	0.862631
AGAP007702		Histidine triad nucleotide binding protein 1 [Source:VB Community Annotation]	D	0	2.27664	0	0.67961	0	0.225158	0.368962	2.50374
AGAP007315		Unknown	D	1.79035	0	0	0.677722	0	0.157079	1.0369	2.10401
AGAP007803		Unknown	D	0.722029	1.33045	0.0420547	0.675688	0.242173	0.584143	0.147571	0.197208
AGAP002920		Unknown	D	1.33495	0.743091	0.393449	0.67403	0	0	0.621226	0
AGAP001154		SWI/SNF-related matrix-associated actin-dependent regulator of chromatin [Source:VB Community Annotation]	D	0.910864	1.07219	0	0.673585	0	0.335696	0.385277	0.498246
AGAP011274		phosphatidylinositol glycan%2C class A [Source:VB Community Annotation]	D	0.232262	0.32431	0	0.673042	0.149726	0.157684	0.751809	1.31993
AGAP008234		NTF2-related export protein 1/2 [Source:VB Community Annotation]	D	1.05291	0.596052	0.41309	0.671128	0.123611	0	0.601159	0.27316
AGAP005809		protein phosphatase inhibitor 2 [Source:VB Community Annotation]	D	1.14262	0.800152	0.27592	0.667749	0.10271	0.481548	0.948573	1.51044
AGAP001452		ubiquitin-conjugating enzyme E2 Q [Source:VB Community Annotation]	D	2.27463	1.65246	0.347001	0.666378	0.173089	0.299291	2.76376	3.89165
AGAP002567		hormone-sensitive lipase [Source:VB Community Annotation]	D	1.0495	0.96053	0.391855	0.665449	0.0462445	0.21416	0.368387	1.78616
AGAP002816		ERO1-like protein alpha [Source:VB Community Annotation]	D	1.07648	0.84186	0.53531	0.665405	0	0.317016	1.47984	2.13842
AGAP011701		predicted G-protein coupled receptor GPCR [Source:VB Community Annotation]	D	1.45582	2.09668	0.244956	0.662852	0.472742	0	0	1.6467
AGAP007485		TM2 domain	D	1.05322	1.25893	0.714685	0.662283	0	0.194044	0.455182	2.51591
AGAP012361		MRG-binding protein [Source:VB Community Annotation]	D	1.0149	0.741491	1.18007	0.662222	0	0.17057	1.11691	2.39547
AGAP002371		Serine/threonine kinase activity	D	0.93566	0.548023	1.67494	0.660442	0.216096	0.482197	1.68905	1.94072
AGAP008864		Unknown	D	0.600037	1.34059	0.455047	0.658364	0	0	0	0.703353
AGAP010397		protein N-terminal methyltransferase [Source:VB Community Annotation]	D	0.701921	1.01168	0	0.658111	0.114533	0	0.720391	2.95983
AGAP005053		E3 ubiquitin-protein ligase LRSAM1 [Source:VB Community Annotation]	D	2.83902	1.72836	0.525951	0.656461	0	0.25247	0.988115	1.43178
AGAP008926		shingomyelin synthase [Source:VB Community Annotation]	D	0.955846	1.29348	0.787962	0.654523	0.276847	0.434064	1.34544	1.73537
AGAP001611		Diphosphomevalonate decarboxylase [Source:UniProtKB/TrEMBL%3BAcc:Q7PXV2]	D	1.79955	1.01938	0	0.652166	0	0	0.409521	0.812545
AGAP009512		E3 ubiquitin-protein ligase UBR7 [Source:VB Community Annotation]	D	0.416185	1.71142	0.697083	0.651972	0	0.16245	0.740149	1.07902
AGAP001512		glutamate--cysteine ligase catalytic subunit [Source:VB Community Annotation]	D	1.29811	0.983679	0.19174	0.651378	0	0.0445378	0.715176	0.832107
AGAP006017		serine/threonine-protein phosphatase 6 regulatory subunit 3 [Source:VB Community Annotation]	D	2.05029	1.34064	0.328272	0.650707	0.186916	0.0547199	1.7158	3.73024
AGAP003715		cyclin G-associated kinase [Source:VB Community Annotation]	D	1.32165	1.42142	0.364195	0.65054	0.479651	0.303437	1.24101	1.28727
AGAP000438		Unknown	D	1.3201	2.02603	1.06211	0.649213	0	0	0.213308	0
AGAP005218		Zinc finger Ran-binding domain-containing protein 2 [Source:UniProtKB/TrEMBL%3BAcc:Q7Q9I7]	D	2.02453	0.506708	0.284039	0.648901	0.12798	0.193766	1.29708	1.67521
AGAP002253		TatD DNase family protein [Source:VB Community Annotation]	D	1.88621	2.37424	0.758143	0.647734	0	1.00313	2.12688	2.45663
AGAP000566		Unknown	D	0	0.824663	0.310524	0.647342	0	0.159784	0.194441	0
AGAP004797		Unknown	D	0.842487	0.84693	0.303139	0.645221	0	0.596456	0.230925	0.947653
AGAP007714		Ubiquinol-cytochrome c chaperone, CBP3	D	2.03617	3.07431	0.580329	0.643626	0.211489	0.223506	1.30443	4.87308
AGAP008947		mevalonate kinase [Source:VB Community Annotation]	D	1.3404	0.982765	0.23805	0.642345	0.160692	0.128163	0.354626	0.493631
AGAP003861		Peptide deformylase [Source:UniProtKB/TrEMBL%3BAcc:Q7QFS8]	D	0.803444	1.63433	1.2175	0.641892	0.0955871	0.204965	0.408656	1.31101
AGAP008074		phosphatidylinositol glycan%2C class U [Source:VB Community Annotation]	D	2.23758	0.46169	0.564132	0.6417	0.317368	0.359364	0.382338	1.03043
AGAP003263		CDC42 small effector protein-like protein [Source:VB Community Annotation]	D	3.18686	1.28397	0.326989	0.641459	0.141276	0.0766148	0.760282	1.57368
AGAP006239		Protein TSSC1 [Source:VB Community Annotation]	D	0.584638	0.800739	0.549048	0.640647	0	0.0930536	0.976393	1.25236
AGAP007379		ArfGAP with dual PH domains 2 [Source:VB Community Annotation]	D	1.8093	1.08869	0.203458	0.640109	0.315321	0.212025	1.21907	2.19363
AGAP009180		protein son of sevenless [Source:VB Community Annotation]	D	1.42213	1.13276	0.471737	0.639799	0.148111	0.392152	1.70665	2.72131
AGAP000355		Unknown	D	0.703376	0.113039	0.450458	0.638979	0	0.411056	0.225303	0.436464
AGAP002341		Haemolymph juvenile hormone binding protein (JHBP)	D	0.696365	0.350707	0.232543	0.638835	0.435276	0.345753	0.144167	0.439215
AGAP003509		Complexin%2C isoform V [Source:VB Community Annotation]	D	3.72442	1.07369	0.509718	0.638634	0.295021	1.02152	4.6676	6.22896
AGAP009207		extracellular signal-regulated kinase 1/2 [Source:VB Community Annotation]	D	2.84724	1.21649	0.858736	0.635415	0.413021	0.302101	2.5804	4.41425
AGAP008944		Unknown	D	0.247486	0.633146	0	0.634881	0	0	1.29874	1.45188
AGAP011686		BTB/POZ domain-containing protein 13 (germ cell-less protein-like 1) [Source:VB Community Annotation]	D	1.5272	1.8834	0.657235	0.634793	0.367623	0.783723	0.779805	1.09201
AGAP007657		syndecan 2 [Source:VB Community Annotation]	D	1.50197	0.86993	0.904473	0.632829	0	0.0468148	1.38898	4.14581
AGAP008772		nucleoporin p58/p45 [Source:VB Community Annotation]	D	0.922301	0.856415	0.570687	0.632809	0	0.0801401	0	0
AGAP007332		Rab GTPase-activating protein 1 isoform a [Source:VB Community Annotation]	D	1.27635	2.36369	1.44619	0.632548	0.180881	0.440014	0.696365	0.766298
AGAP005216		1-phosphatidylinositol-3-phosphate 5-kinase [Source:VB Community Annotation]	D	1.55843	0.956216	0.394668	0.632511	0.405879	0.297884	1.37458	1.78519
AGAP012476		Transforming growth factor%2C beta receptor 1 b [Source:VB Community Annotation]	D	0	0.886302	0.66069	0.63187	0	0.13377	0.293555	1.45201
AGAP007571		Activating signal cointegrator 1 complex subunit [Source:VB Community Annotation]	D	2.6544	1.57696	0.26621	0.626967	0.233996	0.112272	0.352463	1.40574
AGAP011549		guanine nucleotide-binding protein subunit beta-5	D	2.02301	2.31434	0.538642	0.625709	0	0.325432	0	1.23278
AGAP002672		Unknown	D	1.25911	1.15612	1.4317	0.624113	0.2182	0.22434	1.37068	1.50095
AGAP013018		abhydrolase domain-containing protein FAM108B1 [Source:VB Community Annotation]	D	0.504732	0.709239	0.918726	0.622416	0.359917	0.219252	0	0.444703
AGAP001856	PER	period circadian protein [Source:VB Community Annotation]	D	1.10898	1.29967	0.660988	0.622155	0.146409	1.13092	0.686646	0.812022
AGAP012464		natural resistance-associated macrophage protein [Source:VB Community Annotation]	D	0.373573	1.69705	1.05008	0.617973	0	0.8681	0.757043	1.5286
AGAP000865		Unknown	D	1.88027	0.651912	0.879658	0.616815	0.0818808	0.119692	1.29159	2.62511
AGAP007870		ubiquitin conjugation factor E4 B [Source:VB Community Annotation]	D	0.605039	0.609048	0.221565	0.615878	0.208257	0.158434	0.233438	0.417968
AGAP009628		phosphatidylinositol-3%2C4%2C5-trisphosphate 3-phosphatase and dual-specificity [Source:VB Community Annotation]	D	1.7991	0.746609	0.790664	0.615222	0.307514	0.612997	1.93654	1.45429
AGAP009727		RhoGAP92B [Source:VB Community Annotation]	D	1.07607	1.13286	0.645306	0.614686	0.217565	0.547747	0.309232	0.446982
AGAP006965		Protein TRS85-like protein [Source:VB Community Annotation]	D	1.20592	0.959284	0	0.614342	0	0.17813	0.276619	0.558298
AGAP011548		Unknown	D	0.25262	1.0149	0.428393	0.614248	0	0.109756	0.15712	0.816879
AGAP010841		Unknown	D	1.71085	0.82281	0.501534	0.614242	0.234942	1.20361	1.11297	1.39641
AGAP010494		partitioning defective protein 6 [Source:VB Community Annotation]	D	0.793221	2.68562	0.308295	0.612964	0.273049	0.540329	0.137954	1.09553
AGAP004579	cdk2	cyclin-dependent kinase 2 [Source:VB Community Annotation]	D	1.53193	1.46923	0	0.610381	0	0.450476	0.780286	1.92114
AGAP004729		Unknown	D	0.955622	0.225678	0.667883	0.609721	0	0.138671	1.2069	2.30682
AGAP010036		minor histocompatibility antigen H13	D	2.19078	1.38457	0.150962	0.609485	0.255506	0	0.78027	1.06017
AGAP000763		activin receptor type-2%2C invertebrate [Source:VB Community Annotation]	D	0.52315	0.913333	0.229385	0.608009	0	0	1.26073	0.97567
AGAP005776	PDH	pigment dispersing hormone [Source:VB Community Annotation]	D	1.30285	0	0.223173	0.606506	0.105982	0.681157	1.91447	2.54672
AGAP001276		asparaginyl-tRNA synthetase [Source:VB Community Annotation]	D	0.573306	1.53868	0.433377	0.606376	0	0.492983	0.52614	0
AGAP006701		Zinc finger, C2H2	D	2.85529	1.84952	0.585844	0.604504	0	0.410237	0.521527	4.00792
AGAP000436	Cht11	chitinase [Source:VB Community Annotation]	D	1.35078	0.495146	0.513322	0.600311	0.124762	0.38991	1.52415	1.42314
AGAP000767		membrane-associated progesterone receptor component 2 [Source:VB Community Annotation]	D	0	0.24891	0.417794	0.600179	0.332289	0.180072	0	0.18921
AGAP010288		YY1-associated factor 2 [Source:VB Community Annotation]	D	2.18669	1.9516	0.61622	0.598118	0.280311	0.36717	1.75951	2.15002
AGAP004246		Receptor protein-tyrosine phosphatase 10d [Source:VB Community Annotation]	D	1.96914	0.900983	0.594085	0.59793	0.417294	0.346594	1.6287	2.92681
AGAP011085		Catalytic domain of the Serine/Threonine protein kinase	D	0	0.711731	0	0.597144	0	0.198722	0.455441	1.36645
AGAP002064		Zinc finger, FYVE/PHD-type	D	1.67925	1.29379	0.305383	0.595468	0.147791	0.223085	0.744237	1.30128
AGAP007911		TBC1 domain family, member 15/17 ortholog	D	0.873061	0.795884	0.132173	0.59527	0	0.401671	0.815887	0.995485
AGAP011685		Unknown	D	0.755847	0.297649	0	0.59422	0	0.0556996	0.932017	1.57422
AGAP007604		Unknown	D	0.545448	0.967233	0.219343	0.592746	0	0	0.661367	0.542483
AGAP001751		Oxidation resistance protein [Source:VB Community Annotation]	D	2.73698	0.96775	0.0704702	0.592178	0.133144	0.115013	3.05274	5.24654
AGAP006510		tyrosine-protein kinase Src [Source:VB Community Annotation]	D	1.20882	0.229319	0.293828	0.591082	0	0.204863	0.266756	0.868045
AGAP002151		Unknown	D	1.47549	1.16039	0.749409	0.591037	0.254056	0.239655	0.504926	2.4953
AGAP005174		nucleoporin SEH1 [Source:VB Community Annotation]	D	0.637437	2.43503	0.633531	0.590989	0	0.113684	0.159556	0.502956
AGAP009578		adenosine monophosphate-protein transferase FICD homolog [Source:VB Community Annotation]	D	1.15756	0.794486	0.696171	0.590766	0	0.163408	0.127017	0
AGAP009533		Unknown	D	1.68449	0.483636	0.446363	0.59051	0	0.484079	0.509955	0.86392
AGAP002438		tyrosine-protein phosphatase non-receptor type 11 [Source:VB Community Annotation]	D	1.36711	0.429405	0.310397	0.590311	0.0535911	0.689084	1.46205	1.66929
AGAP004501		allantoicase [Source:VB Community Annotation]	D	0.58012	0	0.595027	0.588186	0	0.199829	1.05706	1.99256
AGAP005244		Homeodomain	D	2.89367	0.582502	0.851742	0.586941	0.35884	0.545684	2.08779	3.57092
AGAP007038		krueppel-like factor 6/7 [Source:VB Community Annotation]	D	0	0.620637	0.361368	0.58671	0	0.0595178	0.644244	1.84367
AGAP009747		gamma-interferon-inducible lysosomal thiol reductase precursor [Source:VB Community Annotation]	D	1.08971	1.29306	0.557862	0.58651	0.27971	0.353408	0.796857	1.13489
AGAP006281		Unknown	D	0.833824	0.880126	1.01651	0.58604	0	0.321943	0.183004	0.771828
AGAP012519		fused [Source:VB Community Annotation]	D	0.919216	1.28643	0.860026	0.585902	0.719164	0.374563	0.885068	2.54002
AGAP007872		Mps one binder kinase activator-like 3 [Source:VB Community Annotation]	D	1.10813	2.78652	0.293521	0.585291	0	0.549946	0	0.534576
AGAP004271		phospholipase/carboxylesterase [Source:VB Community Annotation]	D	0	1.83224	0.396747	0.584066	0	0.091409	0.176822	0.877935
AGAP001109		protein-tyrosine phosphatase [Source:VB Community Annotation]	D	2.33544	0.917255	0.291431	0.583837	0.439381	0.291314	2.96899	3.70579
AGAP004144		BEACH (Beige and Chediak-Higashi) domains	D	1.66456	0.958748	0.0751784	0.583494	0	0	1.25506	1.99172
AGAP001326		mitotic spindle assembly checkpoint protein MAD2B [Source:VB Community Annotation]	D	0.368274	0.934184	0.130128	0.582733	0	0.419252	0.263371	0.331731
AGAP011876		zinc finger protein 277 [Source:VB Community Annotation]	D	0.208312	0.40577	0.262332	0.580561	0	0	0.366111	0.527251
AGAP007538		autocrine motility factor receptor [Source:VB Community Annotation]	D	1.62987	0.454554	0.683475	0.579737	0	0.670004	2.17909	2.64628
AGAP004573		E3 ubiquitin-protein ligase RNF19A [Source:VB Community Annotation]	D	2.00807	1.55944	1.01745	0.578308	0.151943	0.243003	1.46048	2.93447
AGAP008002		cyclin K [Source:VB Community Annotation]	D	1.1033	1.38105	0.0719481	0.577729	0	0	0.185599	0.510361
AGAP002397		60 kDa lysophospholipase [Source:VB Community Annotation]	D	1.66788	0.0943031	0.716834	0.575909	0	0	0.357431	0
AGAP004746	Thoc5	THO complex subunit 5 [Source:VB Community Annotation]	D	1.81789	0.56738	0	0.575898	0.160313	0.370363	1.51004	2.09493
AGAP012718		proline oxidase [Source:VB Community Annotation]	D	1.36868	0.0826357	0.821161	0.575872	0	0.147429	0.410751	1.74615
AGAP003332		Unknown	D	2.15229	0.275293	0	0.57355	0	0.272928	0.642932	0.495435
AGAP005825		acylglycerol kinase [Source:VB Community Annotation]	D	0.220055	2.40978	0	0.573513	0.186573	0.571991	0.0792207	0.35015
AGAP003863		Lnk/SH2B adaptor for Ins-Chico	D	1.32837	1.56577	0.572232	0.573113	0.327959	0.519194	0.580945	0.762653
AGAP008349		pyruvate dehyrogenase phosphatase catalytic subunit 1 [Source:VB Community Annotation]	D	0.847271	0.811638	0.260485	0.572076	0	0.313906	0.643157	1.3346
AGAP010420		valyl-tRNA synthetase [Source:VB Community Annotation]	D	1.63117	2.5538	0.26764	0.570937	0	0.297227	1.13922	1.44961
AGAP001536		Unknown	D	2.49779	1.05183	0.689691	0.570377	0.303525	0.207417	1.03872	2.79465
AGAP001362		polyadenylation factor subunit 2 [Source:VB Community Annotation]	D	0.679868	0.828901	0.333783	0.570012	0	0.3034	1.27704	3.12426
AGAP012101		Unknown	D	1.03406	1.06598	0.249404	0.56987	0.383557	0.234283	0.4545	0
AGAP004344		hairless [Source:VB Community Annotation]	D	2.34371	0.635073	0.26927	0.569721	0.483354	0.463969	1.34639	2.65542
AGAP009619		S-adenosylmethionine decarboxylase proenzyme [Source:UniProtKB/TrEMBL%3BAcc:Q7Q1V3]	D	0.407515	0.251227	0	0.56957	0.317017	0	2.25034	1.74406
AGAP004989		abelson tyrosine-protein kinase 1 [Source:VB Community Annotation]	D	1.16475	0.899617	0.226349	0.569056	0.0568196	0.363154	1.08112	2.276
AGAP007512		phosphatidylinositol 4-kinase [Source:VB Community Annotation]	D	2.98169	1.07984	0.750609	0.568264	0.0370671	0.961264	1.10694	1.89746
AGAP003496		ADAM (A DISINTEGRIN AND METALLOPROTEASE DOMAIN)	D	0.908079	1.13418	0.182028	0.565919	0	0.422244	1.36464	1.46602
AGAP010757		Unknown	D	0.877977	0.325913	0	0.562466	0	0.143605	0.135642	0.920593
AGAP012449		Unknown	D	0.434824	0.413518	0.506556	0.560058	0.121823	0.147882	0.975306	0
AGAP010346	Mer	merlin [Source:VB Community Annotation]	D	1.80999	1.13753	0.462	0.559949	0.317114	0.620189	2.21119	2.54574
AGAP005437		Unknown	D	0.482276	1.58425	0.607614	0.559172	0.358182	0.554789	0.213211	0.47585
AGAP000751		mitotic spindle assembly checkpoint protein MAD2 [Source:VB Community Annotation]	D	0.485265	1.22847	0	0.557969	0	0.301349	0	1.47821
AGAP006712		BTB (POZ) domain containing 9	D	0.273728	1.56778	0.135641	0.55775	0	0	0.320206	0.163737
AGAP001762	APG9	autophagy related gene [Source:VB Community Annotation]	D	2.03481	0.55763	0.189718	0.556317	0.147374	0.439543	1.91224	3.59924
AGAP009565		TANK-binding kinase 1 [Source:VB Community Annotation]	D	0	0.857101	0.259517	0.55617	0.0888102	0.0857028	0.317259	1.62163
AGAP001941		phosphatidic acid phosphatase type 2 domain-containing protein 1B [Source:VB Community Annotation]	D	0.742894	0.721058	0.265513	0.555965	0	0	0.0627635	0
AGAP010516		Unknown	D	0.990613	0.760534	0	0.553892	0	0	0.368754	1.93983
AGAP005746		Unknown	D	0.149244	0.591627	0.66268	0.551843	0	0.0478429	0.847731	0.212257
AGAP004495		Unknown	D	0.619602	0.421924	0	0.550718	0.309162	0.280377	1.06098	3.11921
AGAP010518		Unknown	D	1.00966	1.20142	0.43809	0.550682	0.0447801	0.464088	0.474508	0.389289
AGAP013466		AMP-dependent synthetase/ligase	D	0.32746	0.722589	0.555098	0.550207	0.246619	0.0499308	0.329503	0.581429
AGAP001606		5-oxoprolinase (ATP-hydrolysing) [Source:VB Community Annotation]	D	0.624858	0.580006	0.590414	0.549453	0.104475	0.232823	0	0.857413
AGAP004833		serine/threonine-protein kinase PRP4 [Source:VB Community Annotation]	D	0.340676	0.555505	0.251371	0.548371	0.0940734	0.246556	0.745839	3.03273
AGAP004560		cohesin complex subunit SCC1 [Source:VB Community Annotation]	D	1.37112	0.724819	0.26706	0.547604	0.111548	0.0708285	0	2.80929
AGAP002951		BTB/POZ domain-containing protein 7 [Source:VB Community Annotation]	D	1.22295	0.774802	0.544085	0.547129	0.124592	0.366658	0.321398	1.56509
AGAP005544		amyloid beta precursor protein binding protein 1 [Source:VB Community Annotation]	D	1.26864	1.62177	0.24227	0.546835	0	0.316633	0.385858	0.162398
AGAP007080		hexosaminidase [Source:VB Community Annotation]	D	0.440819	1.29583	0.423504	0.545503	0.227537	0	0.62144	1.84051
AGAP006218	GPRMTH4	methuselah receptor 4 [Source:VB Community Annotation]	D	3.33914	2.27189	0.712014	0.543625	0.346991	0.343999	2.81183	4.58703
AGAP011318		Synaptogyrin [Source:VB Community Annotation]	D	0.924202	0	0.633259	0.541509	0.209967	0	0.82824	4.20361
AGAP004992		microsomal prostaglandin-E synthase 2 [Source:VB Community Annotation]	D	2.89391	1.42223	0	0.539769	0.294115	0.308052	1.71052	2.26895
AGAP007715		Unknown	D	3.12024	0.651017	0	0.539138	0	0.311821	1.94343	2.52789
AGAP005897		ubiquitin-protein ligase E3 B [Source:VB Community Annotation]	D	0.471155	1.35939	0.541638	0.537908	0.0342178	0	1.1127	1.24912
AGAP001427		Unknown	D	1.13868	0.260841	0.308743	0.536982	0	0.433706	0.904087	1.29764
AGAP012247		phosphoserine phosphatase [Source:VB Community Annotation]	D	1.88998	0.534683	0.225801	0.536652	0.751187	0.215783	0.534665	1.01336
AGAP011123	Tsc2	tuberous sclerosis 2 [Source:VB Community Annotation]	D	0.364748	0.4834	0.173423	0.536548	0	0.1279	0.233064	0.420587
AGAP011582	APG3	autophagy related gene [Source:VB Community Annotation]	D	1.11424	2.54794	0.300267	0.535752	0	0.22018	1.06599	2.14152
AGAP003014		fasciculation and elongation protein zeta 2 (zygin II) [Source:VB Community Annotation]	D	1.34071	0.929467	0.801397	0.534172	0.0601085	0.772587	0.475233	1.18897
AGAP012354		Syntrophin%2C alpha 1 [Source:VB Community Annotation]	D	2.17277	0.220681	0.492348	0.533844	0.110855	0	1.90732	2.70317
AGAP008136		peptidyl-prolyl cis-trans isomerase-like 4 [Source:VB Community Annotation]	D	1.70607	1.96318	0.565581	0.532089	0.0580405	0.188777	0.633509	0.442957
AGAP007524		Suppression of tumorigenicity [Source:VB Community Annotation]	D	0.392478	0.481667	1.02313	0.531578	0.101394	0.357799	0.20493	1.00758
[truncated: 11,363 more rows]
